# Supplementary material for: SOD1 is a synthetic-lethal target in PPM1D-mutant leukemia cells
Source: eLife. 2024 Jun 18;12:RP91611. doi: 10.7554/eLife.91611 (PMC11186636; doi:10.7554/eLife.91611)
Supplement: Figure 1—source data 1. [file elife-91611-fig1-data1.xlsx]

## Sheet: All Genes
Gene	sgRNA	Mut2102|beta	Mut2102|z	Mut2102|p-value	Mut2102|fdr	Mut2102|wald-p-value	Mut2102|wald-fdr	Mut2113|beta	Mut2113|z	Mut2113|p-value	Mut2113|fdr	Mut2113|wald-p-value	Mut2113|wald-fdr
PRRG1	5	-0.30644	-6.7326	0.15966	0.75916	1.67e-11	3.4e-11	1.5091	32.992	0.97839	0.99835	1.07e-238	2.02e-238
SSBP2	5	0.095484	1.7218	0.76886	0.9835	0.085103	0.098979	0.61706	9.3623	0.18907	0.80611	7.8e-21	8.72e-21
APOM	9	0.041404	1.3711	0.64404	0.97483	0.17034	0.19201	1.8083	59.54	0.62513	0.97217	0	0
MFF	5	-0.053024	-1.1695	0.46048	0.94988	0.24222	0.26799	2.0153	44.935	0.38803	0.91513	0	0
TTLL12	5	0.0026533	0.067045	0.56317	0.96337	0.94655	0.95157	2.2261	56.84	0.20908	0.8225	0	0
WNT8B	5	-0.051115	-1.1847	0.46376	0.95066	0.23613	0.26156	0.97839	21.386	0.39853	0.92189	1.79e-101	2.38e-101
GPC5	5	0.061856	1.6014	0.69033	0.97759	0.10929	0.12563	1.8861	48.761	0.52968	0.95483	0	0
RTN4RL2	5	-0.15577	-3.9147	0.3075	0.89601	9.05e-05	0.00013178	1.3007	32.082	0.71424	0.9818	7.9e-226	1.43e-225
DLAT	5	-0.75454	-17.805	0.021834	0.3202	6.47e-71	8.85e-70	-0.083034	-1.7746	0.042279	0.48933	0.075966	0.077682
WIPF3	5	0.050955	1.3173	0.66501	0.97606	0.18775	0.21054	1.043	25.977	0.45115	0.93702	8.95e-149	1.33e-148
TRPM2	5	0.31424	7.9891	0.69609	0.97759	1.36e-15	3.32e-15	1.8381	46.182	0.58855	0.9654	0	0
DOPEY1	5	0.45707	11.265	0.39807	0.93434	1.96e-29	8.16e-29	1.689	40.549	0.7824	0.98659	0	0
TMEM63A	5	0.059334	1.4691	0.68399	0.97759	0.14181	0.16112	1.6994	41.519	0.76799	0.98659	0	0
CD72	5	0.33261	8.5222	0.65412	0.97483	1.57e-17	4.15e-17	1.8372	46.377	0.58956	0.9654	0	0
SLC23A3	5	0.41959	11.097	0.46663	0.95066	1.3e-28	5.28e-28	1.4001	36.064	0.83724	0.98873	8.2e-285	1.77e-284
TSSK4	5	0.043662	1.0639	0.64883	0.97483	0.28735	0.31478	1.4446	33.997	0.89364	0.99349	2.5e-253	4.89e-253
ICOSLG	5	0.60377	15.281	0.19349	0.8083	1.03e-52	8.78e-52	1.6382	39.769	0.85019	0.99087	0	0
DIAPH1	5	-0.32598	-7.3894	0.14726	0.74587	1.47e-13	3.3e-13	1.4335	32.182	0.87932	0.99277	3.13e-227	5.7e-227
PTP4A3	5	0.1243	3.0459	0.83788	0.98841	0.00232	0.0030748	1.7951	43.572	0.64185	0.97502	0	0
CHAD	5	0.34582	8.7778	0.62327	0.97483	1.67e-18	4.6e-18	1.336	32.55	0.75741	0.98553	2.11e-232	3.91e-232
MIDN	5	0.22837	5.6521	0.90574	0.99436	1.58e-08	2.81e-08	1.3776	32.822	0.80934	0.98659	2.84e-236	5.31e-236
UTS2R	5	0.092383	2.317	0.76147	0.98201	0.020503	0.02524	1.7634	43.938	0.68279	0.98041	0	0
BCKDHB	5	-0.25342	-6.0221	0.20345	0.81656	1.72e-09	3.2e-09	0.47636	10.397	0.13942	0.73934	2.56e-25	2.89e-25
TBX3	5	-0.14923	-3.5019	0.31549	0.89752	0.00046189	0.00064011	-0.0068018	-0.14135	0.049098	0.51543	0.88759	0.88912
GHRL	10	0.012151	0.43547	0.58253	0.96636	0.66322	0.68718	1.6975	60.344	0.77079	0.98659	0	0
MAGEB17	5	0.34944	8.0834	0.61454	0.97329	6.3e-16	1.56e-15	1.7668	40.283	0.67817	0.98041	0	0
MS4A2	5	0.84865	17.804	0.046555	0.48267	6.59e-71	9.01e-70	1.7799	34.576	0.66129	0.97839	5.9e-262	1.19e-261
GDA	5	0.26828	6.4946	0.80589	0.98428	8.33e-11	1.65e-10	1.6518	39.118	0.83213	0.98873	0	0
DENND3	5	0.053111	1.3455	0.67001	0.97606	0.17847	0.20073	1.3035	32.042	0.71767	0.9818	2.87e-225	5.19e-225
VSTM5	5	0.4276	10.259	0.45154	0.94703	1.07e-24	3.75e-24	1.0268	22.669	0.43798	0.93471	8.98e-114	1.23e-113
LYPD1	7	0.14167	4.1406	0.8792	0.99332	3.46e-05	5.17e-05	1.6901	48.603	0.78084	0.98659	0	0
CACNA2D2	5	0.35067	8.8054	0.61136	0.97292	1.3e-18	3.61e-18	1.576	38.301	0.93258	0.99718	0	0
TMEM174	5	-0.20695	-5.2044	0.24779	0.85723	1.95e-07	3.27e-07	1.085	26.469	0.48889	0.94219	2.19e-154	3.28e-154
IQCC	5	0.21919	5.5834	0.92919	0.99473	2.36e-08	4.15e-08	1.5827	39.374	0.92377	0.99587	0	0
ELOVL6	5	0.25996	6.5234	0.82684	0.98661	6.87e-11	1.36e-10	1.0563	24.687	0.4628	0.93789	1.49e-134	2.14e-134
TFDP2	5	0.046378	1.162	0.65476	0.97483	0.24525	0.2712	1.5092	37.261	0.97847	0.99835	6.99e-304	1.6e-303
KDELR2	5	0.75865	17.154	0.080549	0.60988	5.89e-66	7.18e-65	1.8344	38.627	0.59301	0.9654	0	0
SLC47A1	5	0.2219	5.3899	0.92224	0.99473	7.05e-08	1.21e-07	0.76981	17.151	0.26098	0.85952	6.17e-66	7.64e-66
PLK2	5	-0.22227	-4.9499	0.23172	0.83928	7.42e-07	1.21e-06	2.7945	65.492	0.022156	0.38872	0	0
MYO5C	5	0.63186	16.535	0.16634	0.76988	2.07e-61	2.26e-60	1.0787	26.782	0.48293	0.94096	5.27e-158	7.97e-158
NME3	5	-0.15859	-4.0627	0.30408	0.89568	4.85e-05	7.18e-05	1.8299	47.076	0.59831	0.9654	0	0
ZNF248	9	0.20054	5.5169	0.97434	0.99833	3.45e-08	6.02e-08	1.2851	32.567	0.69586	0.98041	1.22e-232	2.26e-232
ID1	5	0.14932	3.6548	0.89816	0.99436	0.00025735	0.00036331	0.44088	9.392	0.12954	0.72477	5.89e-21	6.58e-21
HES2	5	0.069304	1.7145	0.70716	0.97763	0.08644	0.10042	0.63926	14.579	0.19828	0.816	3.82e-48	4.55e-48
MFAP3L	5	0.057412	1.307	0.67968	0.97672	0.19121	0.21411	1.4651	32.369	0.92052	0.99583	7.49e-230	1.38e-229
CCND2	5	0.23527	6.0684	0.8883	0.99433	1.29e-09	2.41e-09	1.5058	37.857	0.97386	0.99835	0	0
WDYHV1	6	-0.96653	-20.634	0.009262	0.20267	1.35e-94	3.02e-93	1.5952	36.044	0.90708	0.99482	1.7e-284	3.66e-284
CCL24	5	-0.18489	-4.4369	0.27279	0.87767	9.13e-06	1.4e-05	1.4439	34.006	0.89283	0.99314	1.8e-253	3.53e-253
CD5	5	-0.37774	-9.1426	0.11737	0.69579	6.1e-20	1.78e-19	2.1355	53.209	0.27581	0.86685	0	0
PTPRT	5	-0.33347	-8.3814	0.14253	0.74202	5.23e-17	1.36e-16	2.0983	53.678	0.30756	0.88534	0	0
CCDC117	5	0.052028	1.2452	0.66747	0.97606	0.21304	0.23726	2.5754	62.665	0.056783	0.54394	0	0
ARHGEF10	5	0.070819	1.7913	0.71059	0.97771	0.073241	0.085732	1.8937	47.783	0.52012	0.94935	0	0
COL16A1	5	0.26298	6.7698	0.8189	0.9862	1.29e-11	2.65e-11	2.0766	53.372	0.32769	0.89168	0	0
ZNF488	5	0.22797	5.9286	0.90676	0.99436	3.06e-09	5.62e-09	1.7003	43.586	0.76671	0.98659	0	0
DUSP9	5	0.46205	11.995	0.38992	0.93033	3.77e-33	1.81e-32	1.33	33.321	0.7501	0.98497	1.93e-243	3.68e-243
MRPS11	5	0.60202	11.187	0.19525	0.80911	4.73e-29	1.94e-28	2.3642	43.485	0.12927	0.7247	0	0
KAAG1	5	0.39786	10.248	0.50932	0.95635	1.21e-24	4.22e-24	1.4648	36.686	0.92012	0.99583	1.21e-294	2.68e-294
AKAP3	5	-0.071472	-1.6285	0.43022	0.94022	0.10343	0.11916	1.7493	39.707	0.70138	0.98041	0	0
PLXNC1	5	0.41074	10.913	0.48458	0.95304	9.97e-28	3.91e-27	1.4401	37.487	0.88777	0.99306	1.5e-307	3.49e-307
FTHL17	5	0.23261	5.7809	0.89522	0.99436	7.43e-09	1.34e-08	0.74667	16.591	0.24838	0.8564	8.04e-62	9.86e-62
SLC6A13	9	0.041948	1.3427	0.64511	0.97483	0.17936	0.20166	1.673	52.827	0.804	0.98659	0	0
SUCO	5	0.16824	3.9213	0.94452	0.99507	8.81e-05	0.00012832	2.3622	55.725	0.13022	0.72477	0	0
KCNH4	5	0.20855	5.399	0.95489	0.99583	6.7e-08	1.15e-07	1.4149	35.584	0.85529	0.99087	2.47e-277	5.2e-277
FAM3B	5	-0.32826	-6.482	0.14575	0.74521	9.05e-11	1.79e-10	1.2978	24.87	0.71078	0.98169	1.58e-136	2.28e-136
SIDT2	5	0.16281	4.0899	0.93101	0.99473	4.32e-05	6.41e-05	2.0981	52.828	0.3077	0.88534	0	0
CNBD1	5	0.55729	12.532	0.24794	0.85728	5.02e-36	2.62e-35	1.4053	29.632	0.84381	0.98989	5.78e-193	9.59e-193
NDUFV3	9	0.12612	3.8022	0.84222	0.98892	0.00014342	0.00020603	0.80544	22.266	0.27982	0.86837	7.93e-110	1.07e-109
DOK3	5	-0.15797	-4.0837	0.30473	0.89601	4.43e-05	6.58e-05	1.3686	34.854	0.79772	0.98659	3.7e-266	7.54e-266
SOSTDC1	5	0.54768	13.933	0.26015	0.86679	4.01e-44	2.68e-43	1.1628	27.434	0.56226	0.96223	1.09e-165	1.67e-165
CYP46A1	5	-0.20524	-5.2318	0.24976	0.85955	1.68e-07	2.84e-07	1.7292	44.142	0.72717	0.9818	0	0
GAL3ST1	5	-0.031466	-0.81066	0.49826	0.95441	0.41756	0.44718	1.624	41.489	0.86922	0.99174	0	0
VRTN	5	0.36801	9.2988	0.57217	0.96436	1.42e-20	4.24e-20	1.8195	45.329	0.61114	0.96898	0	0
GABRR1	5	0.8132	20.317	0.058149	0.52729	9.01e-92	1.91e-90	2.6396	65.827	0.043267	0.49454	0	0
ASTL	5	0.066499	1.6368	0.70086	0.97759	0.10168	0.11725	1.5456	37.379	0.97341	0.99835	8.65e-306	2e-305
SLC27A4	5	0.25923	6.6397	0.82845	0.98688	3.14e-11	6.34e-11	1.823	46.201	0.6068	0.96788	0	0
VPREB3	5	0.5779	14.498	0.22179	0.83121	1.24e-47	9.25e-47	1.5655	37.883	0.9467	0.99718	0	0
DENND5A	5	-0.10045	-2.2443	0.38377	0.92683	0.024813	0.030355	1.0293	21.673	0.44	0.93484	3.68e-104	4.92e-104
NEO1	5	0.2129	5.4582	0.94427	0.99507	4.81e-08	8.34e-08	1.6811	42.34	0.79293	0.98659	0	0
HPS4	5	0.12385	2.7814	0.83678	0.98816	0.0054122	0.0069835	2.4255	55.32	0.10314	0.66741	0	0
PITHD1	5	-0.25771	-5.9331	0.19968	0.81302	2.97e-09	5.47e-09	1.2783	28.455	0.68808	0.98041	4.26e-178	6.78e-178
LRRC27	5	0.42624	10.83	0.45424	0.94843	2.49e-27	9.64e-27	1.4865	36.363	0.94811	0.99718	1.65e-289	3.6e-289
MAB21L3	5	0.52817	13.356	0.28623	0.88646	1.09e-40	6.63e-40	0.73118	16.315	0.23995	0.84782	7.77e-60	9.49e-60
DUSP22	5	0.055261	1.2613	0.67511	0.97613	0.20719	0.23106	1.2273	26.776	0.63126	0.97217	6.09e-158	9.2e-158
STAC	5	0.54532	13.815	0.26336	0.86999	2.06e-43	1.36e-42	1.4633	35.43	0.91825	0.99573	5.89e-275	1.23e-274
DMRTB1	5	0.92042	22.393	0.029796	0.38523	4.62e-111	1.39e-109	2.3536	56.276	0.13436	0.7313	0	0
2022-03-01	5	-0.046514	-1.1576	0.4712	0.9511	0.24702	0.27305	1.8668	46.522	0.55316	0.96153	0	0
FAP	5	0.11083	2.5714	0.80564	0.98428	0.01013	0.012785	1.3958	31.45	0.83144	0.98873	4.21e-217	7.45e-217
ACVR1B	5	0.44225	10.915	0.42435	0.93885	9.73e-28	3.82e-27	1.8167	43.611	0.61459	0.9697	0	0
ZNF43	5	-0.056051	-1.2273	0.45558	0.94928	0.21973	0.24423	1.4795	31.782	0.93873	0.99718	1.14e-221	2.04e-221
ZMYND15	5	0.22606	5.8768	0.9118	0.99436	4.18e-09	7.63e-09	0.73012	17.538	0.23949	0.84766	7.4e-69	9.22e-69
CERCAM	5	0.40194	9.4061	0.50154	0.95502	5.15e-21	1.56e-20	1.6267	36.425	0.86559	0.99172	1.72e-290	3.78e-290
MXD4	5	0.35365	8.8977	0.60516	0.97177	5.7e-19	1.6e-18	0.87514	19.984	0.32325	0.89056	7.64e-89	9.9e-89
CALHM3	5	0.12958	3.3892	0.85042	0.98947	0.00070101	0.00096076	1.0499	26.416	0.45715	0.93789	8.88e-154	1.33e-153
ZNF579	5	0.30004	7.2761	0.72994	0.97987	3.44e-13	7.57e-13	1.8876	45.054	0.52787	0.95483	0	0
CHCHD5	5	-0.1333	-3.0313	0.33683	0.91307	0.0024348	0.0032232	0.37932	8.0078	0.11303	0.69058	1.17e-15	1.28e-15
SIN3B	5	1.2675	30.349	0.003998	0.1342	2.57e-202	2.25e-200	3.3881	81.665	0.0018324	0.1988	0	0
PRSS53	5	-0.079027	-1.9583	0.41804	0.93676	0.0502	0.059724	1.1294	26.961	0.5298	0.95483	4.21e-160	6.4e-160
SNTB1	5	-0.040764	-1.0462	0.4811	0.95304	0.29547	0.32316	2.0539	53.03	0.34967	0.9003	0	0
SPAG1	5	0.34406	8.8596	0.62748	0.97483	8.03e-19	2.24e-18	2.4602	63.716	0.090588	0.63751	0	0
QDPR	5	-0.041787	-1.0219	0.47963	0.95304	0.30683	0.33483	0.67437	15.347	0.21263	0.82629	3.71e-53	4.46e-53
RAB4B	5	-0.063769	-1.65	0.44309	0.94243	0.098946	0.11428	1.1125	27.803	0.51379	0.94861	4.04e-170	6.31e-170
PDCD5	5	-1.0184	-17.713	0.0076739	0.18232	3.31e-70	4.43e-69	-0.036569	-0.5673	0.04621	0.50744	0.57051	0.57414
SLC4A11	5	0.32765	8.3736	0.66523	0.97606	5.59e-17	1.45e-16	-0.024177	-0.51059	0.04751	0.5105	0.60964	0.61308
TRIM14	5	-0.016775	-0.32889	0.52512	0.95755	0.74224	0.76234	1.3469	25.199	0.77106	0.98659	4.13e-140	6e-140
PPAT	5	0.72708	8.433	0.096607	0.64859	3.37e-17	8.81e-17	1.7789	16.683	0.66261	0.97894	1.73e-62	2.13e-62
CMC4	4	0.091822	1.8305	0.75991	0.98201	0.067175	0.078899	1.4293	27.533	0.87402	0.99203	7.04e-167	1.09e-166
NACC1	5	0.065302	1.6772	0.69804	0.97759	0.093504	0.10822	2.4267	63.112	0.10276	0.66688	0	0
KRT3	5	-0.14049	-3.0827	0.32683	0.90523	0.0020512	0.0027278	1.0625	22.277	0.46833	0.93789	6.2e-110	8.41e-110
NRGN	5	0.27074	6.8337	0.7998	0.98428	8.27e-12	1.71e-11	1.3968	34.327	0.83289	0.98873	3.14e-258	6.24e-258
TIRAP	5	0.41337	10.926	0.47934	0.95304	8.68e-28	3.41e-27	1.8373	48.017	0.58948	0.9654	0	0
EPHA4	5	-0.3118	-7.7558	0.15617	0.75674	8.78e-15	2.08e-14	2.068	52.1	0.33579	0.89397	0	0
GLP1R	5	-0.64811	-12.138	0.034394	0.41543	6.61e-34	3.23e-33	2.1496	42.592	0.26431	0.8606	0	0
MRPS6	5	0.69305	11.515	0.11812	0.69705	1.11e-30	4.83e-30	1.614	23.936	0.88271	0.99296	1.3e-126	1.83e-126
PEF1	5	0.19068	4.7522	0.99892	0.99976	2.01e-06	3.21e-06	1.5869	38.535	0.91847	0.99573	0	0
YAF2	14	-0.15947	-6.119	0.30288	0.89501	9.42e-10	1.77e-09	1.0302	37.699	0.4407	0.9349	0	0
KCTD3	5	0.46923	10.642	0.37802	0.92552	1.9e-26	7.13e-26	0.53958	9.5459	0.16004	0.77081	1.35e-21	1.51e-21
PRKD1	5	0.4264	10.762	0.45388	0.94843	5.2e-27	1.99e-26	1.7278	42.441	0.72882	0.9818	0	0
TBC1D10A	5	0.40851	10.596	0.48898	0.95389	3.13e-26	1.16e-25	1.2897	32.495	0.70079	0.98041	1.27e-231	2.35e-231
C1orf159	5	0.021699	0.52801	0.60269	0.97088	0.59749	0.62454	0.74798	16.818	0.24895	0.85644	1.8e-63	2.22e-63
ALDH3A1	5	0.48987	12.778	0.34415	0.91577	2.17e-37	1.18e-36	1.5215	38.707	0.99464	0.99929	0	0
ENTPD3	5	-0.28028	-6.632	0.18043	0.78965	3.31e-11	6.67e-11	1.5632	36.917	0.94968	0.99718	2.46e-298	5.54e-298
EP400	5	0.23899	5.8614	0.87893	0.9933	4.59e-09	8.36e-09	1.3312	31.081	0.75172	0.98503	4.33e-212	7.55e-212
CYP26A1	5	0.26803	6.6689	0.80651	0.98428	2.58e-11	5.22e-11	1.9293	47.641	0.47975	0.94096	0	0
TRA2A	5	-0.11287	-2.4434	0.36543	0.92264	0.014551	0.018132	0.053115	0.91537	0.055272	0.53864	0.36	0.3641
LPHN3	5	0.34174	8.736	0.63296	0.97483	2.41e-18	6.61e-18	1.4835	36.601	0.94409	0.99718	2.76e-293	6.1e-293
CLMN	5	-0.42279	-9.2045	0.096663	0.64859	3.43e-20	1.01e-19	1.545	33.804	0.9742	0.99835	1.7e-250	3.3e-250
SLC16A3	5	0.82755	21.331	0.053096	0.51172	5.8e-101	1.44e-99	1.8487	46.181	0.57479	0.96427	0	0
NNAT	7	0.20484	5.529	0.96424	0.99767	3.22e-08	5.63e-08	1.476	38.775	0.93451	0.99718	0	0
HIBADH	5	-0.15934	-3.6867	0.30302	0.89501	0.00022718	0.00032195	1.1441	25.318	0.54432	0.95892	2.01e-141	2.94e-141
ROPN1L	5	0.041937	1.0373	0.64511	0.97483	0.29958	0.32743	2.2799	57.063	0.17496	0.78682	0	0
TMEM116	5	-0.15352	-3.5243	0.31034	0.89601	0.00042457	0.00059003	1.1737	25.869	0.57402	0.9642	1.5e-147	2.22e-147
TIMD4	5	-0.09071	-2.2688	0.39963	0.93484	0.023278	0.028532	1.453	35.85	0.90468	0.99482	1.87e-281	3.98e-281
FUT1	5	0.16668	4.2067	0.94041	0.99473	2.59e-05	3.89e-05	1.3423	32.674	0.7652	0.98627	3.62e-234	6.73e-234
NTAN1	5	-0.26377	-6.3112	0.19461	0.80886	2.77e-10	5.33e-10	1.2522	29.207	0.65914	0.97814	1.59e-187	2.6e-187
CENPV	5	0.3065	7.8316	0.71462	0.97862	4.82e-15	1.15e-14	1.8407	46.571	0.58526	0.9654	0	0
CCDC30	5	-0.18233	-3.9861	0.27577	0.87767	6.72e-05	9.86e-05	1.6669	36.346	0.81159	0.98659	3e-289	6.57e-289
NYAP2	5	0.32569	8.1919	0.67042	0.97606	2.57e-16	6.46e-16	1.3889	33.869	0.82286	0.98817	1.92e-251	3.74e-251
B3GNT8	5	0.056551	1.4007	0.67807	0.97654	0.16129	0.18223	0.79474	18.119	0.27411	0.86601	2.27e-73	2.85e-73
TSPAN9	5	0.065561	1.4484	0.69873	0.97759	0.14752	0.16735	0.38557	7.2984	0.11489	0.69491	2.91e-13	3.18e-13
ANKRD33B	5	0.062772	1.5773	0.69241	0.97759	0.11472	0.13164	1.6865	41.871	0.7859	0.98659	0	0
LRRC59	5	0.18402	4.6302	0.98401	0.99876	3.65e-06	5.76e-06	1.0581	24.917	0.46461	0.93789	4.92e-137	7.1e-137
TMEM208	5	0.85457	20.54	0.044911	0.47521	9.48e-94	2.09e-92	2.6209	62.699	0.046777	0.50881	0	0
RIMS3	5	0.24612	6.4205	0.86103	0.99054	1.36e-10	2.66e-10	1.1306	28.316	0.53099	0.95483	2.21e-176	3.5e-176
AFAP1L2	5	0.29153	7.2423	0.75027	0.98105	4.41e-13	9.65e-13	0.79503	18.408	0.2743	0.86601	1.14e-75	1.44e-75
EXTL3	5	0.15112	3.7219	0.90265	0.99436	0.00019772	0.0002814	1.1589	26.931	0.55872	0.96212	9.61e-160	1.46e-159
FOXR1	5	-0.059575	-1.476	0.44988	0.94625	0.13993	0.15909	0.88237	20.685	0.32797	0.89176	4.72e-95	6.19e-95
GALR3	5	0.13314	3.4563	0.8588	0.99054	0.00054759	0.00075544	1.5965	40.819	0.90575	0.99482	0	0
HHLA3	7	0.43455	11.792	0.43884	0.94181	4.31e-32	1.98e-31	1.6	41.752	0.9015	0.9945	0	0
CECR6	9	0.42624	14.598	0.45425	0.94843	2.91e-48	2.2e-47	1.5834	52.797	0.92284	0.99583	0	0
TAGLN	5	0.067167	1.4488	0.70253	0.97763	0.1474	0.16723	2.0455	44.287	0.35755	0.90198	0	0
SLC17A8	5	0.48916	11.345	0.34551	0.91683	7.81e-30	3.31e-29	1.8388	41.095	0.58771	0.9654	0	0
STK19	5	0.011185	0.29043	0.58051	0.96636	0.77149	0.78989	1.0278	25.598	0.43879	0.93478	1.59e-144	2.34e-144
LAIR1	5	0.28079	6.4487	0.77583	0.9835	1.13e-10	2.22e-10	1.4574	32.491	0.9105	0.99483	1.43e-231	2.64e-231
C3orf22	5	0.57001	14.666	0.23185	0.83928	1.07e-48	8.17e-48	0.51554	11.528	0.15176	0.75623	9.52e-31	1.09e-30
CCDC71	5	0.060088	1.5424	0.68601	0.97759	0.12297	0.14065	1.7753	45.29	0.66672	0.97964	0	0
AGO3	5	0.21378	4.5479	0.94215	0.99473	5.42e-06	8.45e-06	1.4528	29.114	0.90434	0.99472	2.39e-186	3.89e-186
OTOS	5	0.095474	2.4622	0.76885	0.9835	0.013807	0.017235	1.2501	31.151	0.65676	0.97766	4.89e-213	8.55e-213
IMPG2	5	-0.14194	-3.2737	0.32493	0.90372	0.0010613	0.0014382	1.9014	44.194	0.51156	0.94837	0	0
TTC16	5	0.17995	4.6736	0.9738	0.99833	2.96e-06	4.69e-06	1.0663	26.453	0.47173	0.93845	3.36e-154	5.04e-154
TP53INP2	5	0.73926	19.305	0.089944	0.63125	4.84e-83	8.6e-82	2.1793	56.28	0.24209	0.84915	0	0
C9orf62	5	-0.24968	-6.1417	0.20644	0.8179	8.17e-10	1.54e-09	1.9786	49.277	0.42534	0.93034	0	0
C11orf91	5	-0.28729	-6.4778	0.17425	0.77885	9.3e-11	1.84e-10	1.7334	39.273	0.72162	0.9818	0	0
SRMS	5	0.53497	13.932	0.27693	0.87775	4.04e-44	2.7e-43	1.2584	31.245	0.66587	0.97963	2.58e-214	4.52e-214
ARMCX1	5	0.55884	14.345	0.24594	0.85697	1.15e-46	8.27e-46	1.5174	37.403	0.98907	0.99928	3.54e-306	8.19e-306
PIWIL3	5	0.62698	13.728	0.171	0.77473	6.88e-43	4.45e-42	1.6228	34.019	0.87098	0.99193	1.17e-253	2.3e-253
ZIC2	5	0.069637	1.7425	0.7078	0.97763	0.081417	0.094841	1.1353	27.566	0.53562	0.95626	2.83e-167	4.39e-167
GC	5	0.52358	13.495	0.29298	0.88817	1.67e-41	1.04e-40	1.7801	44.868	0.66103	0.97839	0	0
MEGF6	5	0.44684	11.552	0.41586	0.93607	7.19e-31	3.16e-30	0.70941	16.998	0.22881	0.83755	8.47e-65	1.05e-64
HIST1H4D	5	0.29078	6.6592	0.75197	0.98172	2.75e-11	5.57e-11	1.7409	38.53	0.71243	0.9818	0	0
KIAA2013	5	-0.77961	-19.311	0.019557	0.3031	4.36e-83	7.76e-82	1.4081	35.499	0.84725	0.99049	5.16e-276	1.08e-275
OLFM2	5	-0.16249	-4.0674	0.29899	0.89181	4.75e-05	7.04e-05	1.5597	38.81	0.95464	0.9981	0	0
KDM5B	5	-0.13986	-2.7507	0.32755	0.90526	0.0059472	0.0076546	1.3894	26.139	0.82345	0.98817	1.3e-150	1.94e-150
KRT16	4	0.23301	5.3995	0.89411	0.99436	6.68e-08	1.15e-07	1.401	31.771	0.83848	0.98873	1.63e-221	2.92e-221
PIK3CD	5	0.039421	0.83776	0.63987	0.97483	0.40217	0.43154	1.1954	23.97	0.59692	0.9654	5.78e-127	8.14e-127
C20orf144	5	0.26042	6.6548	0.82564	0.98661	2.84e-11	5.74e-11	1.2644	31.26	0.67263	0.98041	1.61e-214	2.83e-214
IRX4	5	0.1774	4.5895	0.96762	0.99767	4.44e-06	6.96e-06	1.8958	48.845	0.51785	0.94861	0	0
YLPM1	5	-0.45357	-10.579	0.083636	0.61958	3.75e-26	1.39e-25	2.3749	58.725	0.12449	0.71608	0	0
ANXA13	5	0.36947	8.4936	0.5687	0.96365	2e-17	5.29e-17	1.6298	36.418	0.86151	0.99172	2.22e-290	4.88e-290
ZNF517	5	-0.16213	-3.9831	0.29933	0.89181	6.8e-05	9.98e-05	1.5385	37.406	0.98294	0.99835	3.07e-306	7.1e-306
BTBD2	5	0.14413	3.6943	0.8855	0.99433	0.00022046	0.00031264	1.8672	47.56	0.5528	0.96153	0	0
CHST3	5	0.51275	11.651	0.30849	0.89601	2.27e-31	1.02e-30	0.97284	20.323	0.39409	0.91844	8e-92	1.04e-91
PRLH	5	-0.053454	-1.3904	0.45995	0.94974	0.16442	0.18558	1.4383	36.983	0.88531	0.99306	2.19e-299	4.94e-299
GDE1	5	0.63729	15.447	0.16114	0.76236	7.94e-54	6.96e-53	1.4178	32.213	0.85904	0.99099	1.16e-227	2.12e-227
PTCD2	5	-0.040324	-0.84278	0.48207	0.95304	0.39935	0.42863	1.971	41.605	0.43323	0.93347	0	0
BGLAP	5	0.10513	2.6282	0.79125	0.98425	0.0085835	0.010905	2.918	74.945	0.012827	0.32535	0	0
THEGL	5	0.08249	2.0092	0.7374	0.97996	0.044514	0.053227	1.8284	44.225	0.59997	0.96572	0	0
KRTAP1-3	2	0.55599	8.9468	0.2494	0.85927	3.66e-19	1.04e-18	2.2486	36.043	0.19415	0.81236	1.78e-284	3.84e-284
TMEM247	5	0.36125	9.3786	0.58755	0.96873	6.69e-21	2.02e-20	1.1624	29.073	0.56183	0.96223	7.9e-186	1.29e-185
C6orf58	5	0.30382	6.8568	0.72106	0.97959	7.04e-12	1.46e-11	2.1665	48.837	0.25151	0.85795	0	0
LIPE	5	0.48001	12.593	0.36009	0.92053	2.31e-36	1.22e-35	1.8023	46.512	0.63264	0.97217	0	0
ADM	5	0.60911	16.101	0.18775	0.79788	2.52e-58	2.53e-57	1.735	44.992	0.71966	0.9818	0	0
ADCY7	5	0.13796	3.6339	0.87076	0.99151	0.00027921	0.00039272	2.0605	54.32	0.34304	0.89693	0	0
DLGAP1	5	0.6551	16.209	0.14649	0.74531	4.37e-59	4.47e-58	1.5787	38.028	0.92912	0.99718	0	0
PSMB11	5	0.40502	10.367	0.49527	0.95429	3.52e-25	1.25e-24	1.5098	37.26	0.9791	0.99835	7.41e-304	1.7e-303
C9orf172	5	-0.078855	-2.0102	0.41832	0.93676	0.044405	0.0531	1.0541	25.923	0.46083	0.93789	3.68e-148	5.45e-148
APCDD1	5	0.066634	1.6833	0.70115	0.97762	0.092319	0.10689	1.3481	33.212	0.77257	0.98659	7.19e-242	1.37e-241
ZBTB24	5	0.051272	1.1505	0.66573	0.97606	0.24996	0.27613	1.1895	25.625	0.59102	0.9654	8.08e-145	1.19e-144
ITFG2	5	0.2211	5.7463	0.92432	0.99473	9.12e-09	1.64e-08	1.3875	35.166	0.82136	0.98817	6.74e-271	1.39e-270
ACRBP	5	0.38615	9.9622	0.53373	0.95851	2.23e-23	7.4e-23	1.1622	28.484	0.56174	0.96223	1.86e-178	2.97e-178
HAMP	5	-0.023479	-0.59253	0.51272	0.95725	0.5535	0.58126	2.5143	64.477	0.073452	0.60337	0	0
DNAJC22	5	0.4723	12.248	0.37288	0.92552	1.72e-34	8.57e-34	1.8841	48.126	0.53227	0.95483	0	0
DSC3	5	0.43608	9.3547	0.43588	0.941	8.38e-21	2.53e-20	0.83671	15.658	0.29926	0.88242	2.94e-55	3.56e-55
INMT	5	0.0058045	0.14784	0.56919	0.96365	0.88247	0.89343	2.3332	60.113	0.14473	0.74554	0	0
PDZD7	5	0.43336	11.372	0.44082	0.94243	5.78e-30	2.46e-29	0.60478	14.785	0.1842	0.79933	1.83e-49	2.19e-49
SDC3	5	0.13456	3.4207	0.86241	0.99054	0.00062466	0.00085874	2.386	61.406	0.11947	0.70497	0	0
PTBP2	5	0.50285	12.076	0.32384	0.90246	1.42e-33	6.87e-33	0.6919	14.555	0.22085	0.8331	5.42e-48	6.44e-48
C2orf71	5	0.32879	8.5869	0.66257	0.9756	8.93e-18	2.39e-17	1.6473	42.213	0.8381	0.98873	0	0
BEAN1	13	0.53695	22.55	0.27456	0.87767	1.34e-112	4.13e-111	1.5655	63.743	0.94662	0.99718	0	0
ZNF829	5	0.9844	23.524	0.019801	0.30557	2.3e-122	8.08e-121	1.2097	26.135	0.61247	0.96957	1.47e-150	2.18e-150
ICAM5	5	0.26127	6.3567	0.82348	0.98661	2.06e-10	4e-10	1.5447	36.74	0.97449	0.99835	1.68e-295	3.76e-295
ZNFX1	5	0.13687	3.5428	0.86787	0.99054	0.00039583	0.00055119	2.1206	55.059	0.28813	0.87331	0	0
PIGN	5	0.66077	16.997	0.14216	0.74058	8.67e-65	1.02e-63	0.51262	11.407	0.15091	0.7549	3.87e-30	4.42e-30
S100A7	4	-0.17274	-3.696	0.28697	0.88646	0.00021899	0.00031063	1.0713	21.889	0.4763	0.94096	3.34e-106	4.49e-106
IRF7	5	0.080297	2.0623	0.73191	0.97993	0.039183	0.047033	2.0595	53.045	0.34395	0.89693	0	0
FLVCR2	5	0.19423	4.3874	0.9901	0.99876	1.15e-05	1.76e-05	1.6265	35.787	0.86587	0.99172	1.77e-280	3.76e-280
MDGA1	5	0.36096	9.2331	0.58822	0.96901	2.63e-20	7.77e-20	1.5284	38.112	0.99605	0.99929	0	0
GPATCH4	5	0.30844	7.6987	0.71038	0.97769	1.37e-14	3.22e-14	1.4917	35.85	0.95531	0.99817	1.85e-281	3.96e-281
CORO2A	5	0.36538	9.3595	0.57857	0.96636	8.01e-21	2.42e-20	1.5986	39.9	0.90328	0.99472	0	0
TUBA4A	5	0.35085	8.6268	0.61092	0.97262	6.31e-18	1.7e-17	1.5001	35.178	0.96658	0.99835	4.37e-271	9.03e-271
STAG3	5	-0.08696	-2.1634	0.4051	0.9351	0.030509	0.037034	1.7573	43.641	0.69071	0.98041	0	0
KIAA1671	5	-0.068276	-1.6973	0.43539	0.941	0.089648	0.10396	1.8831	46.925	0.53316	0.95506	0	0
LYSMD1	5	0.41552	10.004	0.47472	0.95186	1.47e-23	4.9e-23	1.6495	38.19	0.83524	0.98873	0	0
PLBD2	5	0.48891	12.489	0.34586	0.91683	8.6e-36	4.47e-35	2.1458	54.551	0.26727	0.8618	0	0
C2orf73	5	-0.097951	-2.2229	0.38755	0.92912	0.02622	0.03199	2.3575	54.819	0.13248	0.72871	0	0
GPR107	5	0.27432	5.9844	0.79129	0.98425	2.17e-09	4.02e-09	0.6071	11.444	0.18514	0.80091	2.51e-30	2.88e-30
TMEM178B	5	-0.081542	-2.063	0.414	0.93592	0.039116	0.046956	1.0231	25.016	0.43499	0.93347	4.1e-138	5.92e-138
PLA2G6	5	-0.13793	-3.196	0.3302	0.90738	0.0013935	0.0018746	2.3667	55.795	0.12809	0.72065	0	0
OCLN	8	-0.032538	-1.0252	0.49641	0.95441	0.30526	0.3333	2.2553	72.156	0.18986	0.80646	0	0
PRR15	5	0.73827	18.793	0.090477	0.63351	8.65e-79	1.42e-77	1.0615	25.028	0.46751	0.93789	3.02e-138	4.36e-138
CLDND2	5	0.018645	0.42679	0.59644	0.96949	0.66953	0.6932	0.88313	18.71	0.32844	0.89187	4.11e-78	5.21e-78
ST6GALNAC2	5	0.43309	11.306	0.44129	0.94243	1.23e-29	5.15e-29	2.2032	57.347	0.22492	0.83512	0	0
ASPG	5	-0.32067	-8.1485	0.15064	0.75105	3.69e-16	9.21e-16	1.8367	47.181	0.59013	0.9654	0	0
EPM2AIP1	5	0.035334	0.90489	0.63123	0.97483	0.36552	0.39472	1.4775	37.046	0.93648	0.99718	2.09e-300	4.74e-300
ZNF562	6	0.25251	6.3299	0.84538	0.98892	2.45e-10	4.74e-10	1.8919	46.611	0.52219	0.95089	0	0
ANKHD1	5	-0.95072	-18.901	0.0097951	0.20777	1.12e-79	1.85e-78	0.19867	3.5303	0.074996	0.60674	0.0004151	0.00043309
TSGA10IP	5	0.32735	7.8957	0.6662	0.97606	2.89e-15	6.97e-15	1.8357	43.581	0.59128	0.9654	0	0
RNF219	5	0.45828	9.8269	0.396	0.93351	8.62e-23	2.8e-22	2.7157	59.782	0.031462	0.43597	0	0
MAT2B	5	0.21524	4.8722	0.93875	0.99473	1.1e-06	1.78e-06	0.81552	16.872	0.2858	0.87167	7.27e-64	8.96e-64
ZSWIM8	5	0.54297	13.251	0.26618	0.87133	4.44e-40	2.64e-39	2.9648	73.606	0.010295	0.31034	0	0
FGF3	5	0.43897	11.475	0.43025	0.94022	1.76e-30	7.62e-30	1.5666	39.952	0.94502	0.99718	0	0
C11orf94	5	0.18365	4.6093	0.98313	0.99876	4.04e-06	6.35e-06	0.9756	23.196	0.39625	0.92005	4.96e-119	6.86e-119
C6orf165	5	0.051618	1.2676	0.66671	0.97606	0.20495	0.22868	1.1069	25.648	0.50846	0.94814	4.48e-145	6.59e-145
SCNN1D	5	0.13279	3.314	0.85787	0.99054	0.00091986	0.0012512	1.8862	46.892	0.52942	0.95483	0	0
TTBK1	5	0.32065	8.2484	0.68168	0.97749	1.6e-16	4.07e-16	2.1196	54.372	0.28888	0.87382	0	0
NR2F2	5	0.21807	5.8014	0.93188	0.99473	6.58e-09	1.19e-08	1.0958	28.328	0.49844	0.94638	1.57e-176	2.49e-176
GLOD4	5	-0.2236	-4.9163	0.23048	0.83797	8.82e-07	1.43e-06	2.3814	54.283	0.12166	0.70998	0	0
KLHL6	5	0.25268	5.8249	0.84513	0.98892	5.71e-09	1.04e-08	0.45191	8.6144	0.13279	0.72975	7.03e-18	7.78e-18
TNRC6B	5	-1.1455	-27.506	0.0050641	0.15251	1.47e-166	8.7e-165	0.080725	1.8725	0.058271	0.54825	0.061132	0.062563
SLC14A2	5	0.16111	4.2047	0.92675	0.99473	2.61e-05	3.93e-05	1.6077	41.335	0.89087	0.99306	0	0
ACER2	5	0.090921	2.0743	0.75778	0.98201	0.038055	0.045735	1.4143	30.743	0.85447	0.99087	1.53e-207	2.63e-207
CNNM3	5	0.098932	2.5579	0.77701	0.9835	0.01053	0.01327	0.83068	20.22	0.29505	0.87845	6.52e-91	8.48e-91
MGLL	5	-0.019913	-0.48747	0.5194	0.95738	0.62592	0.65188	0.60934	13.489	0.18613	0.80302	1.81e-41	2.13e-41
ELOVL2	5	0.47303	11.197	0.37179	0.92506	4.2e-29	1.73e-28	1.4548	33.408	0.90709	0.99482	1.05e-244	2e-244
TXNL1	5	-0.36457	-7.2219	0.12423	0.70465	5.13e-13	1.12e-12	2.1206	44.1	0.28812	0.87331	0	0
SPHK2	5	-0.072027	-1.6482	0.42932	0.94022	0.099306	0.11465	2.2966	53.644	0.16513	0.77696	0	0
RHOH	5	0.1788	4.5592	0.97089	0.99784	5.14e-06	8.02e-06	2.1533	55.054	0.26144	0.85952	0	0
ASB13	5	0.4456	11.656	0.41816	0.93676	2.15e-31	9.63e-31	0.53752	12.781	0.15935	0.76887	2.09e-37	2.44e-37
MX2	5	0.21092	4.8723	0.94941	0.99561	1.1e-06	1.78e-06	1.1687	26.03	0.56893	0.9642	2.29e-149	3.4e-149
FTL	5	-0.076041	-1.8107	0.42272	0.9382	0.070184	0.082282	1.7024	40.354	0.7638	0.98621	0	0
CD248	5	0.37261	9.2353	0.56211	0.96337	2.58e-20	7.62e-20	1.6038	38.63	0.89603	0.99381	0	0
ABHD15	5	0.5918	15.239	0.20646	0.8179	1.95e-52	1.65e-51	0.86665	20.552	0.31804	0.88799	7.35e-94	9.63e-94
DEFA4	5	0.30109	7.3703	0.72746	0.97959	1.7e-13	3.8e-13	1.6279	38.486	0.86396	0.99172	0	0
CDC123	5	0.31373	4.2713	0.69731	0.97759	1.94e-05	2.94e-05	0.34048	3.6264	0.10307	0.66736	0.00028736	0.00030009
CENPW	6	-0.75312	-12.866	0.021922	0.32071	7e-38	3.88e-37	1.2853	22.441	0.69627	0.98041	1.55e-111	2.11e-111
EXD3	5	0.3627	9.1059	0.58421	0.96658	8.55e-20	2.48e-19	1.9558	48.447	0.44978	0.93689	0	0
NSUN7	5	-0.25826	-5.5662	0.19924	0.81291	2.6e-08	4.57e-08	0.38461	6.8838	0.11456	0.69491	5.83e-12	6.32e-12
IL36A	5	0.096078	2.4309	0.77017	0.9835	0.01506	0.018746	1.768	44.332	0.67638	0.98041	0	0
KRTAP3-1	5	0.26728	6.8979	0.80828	0.98491	5.28e-12	1.1e-11	1.1474	28.124	0.54723	0.95928	5e-174	7.88e-174
ZNF800	5	-0.0078166	-0.17419	0.54251	0.95988	0.86172	0.87444	0.57176	11.14	0.17146	0.78541	8e-29	9.13e-29
MSI2	5	1.022	23.82	0.01577	0.27457	2.08e-125	7.75e-124	0.71896	14.474	0.23348	0.84197	1.76e-47	2.09e-47
PCF11	5	-0.082383	-1.8837	0.41266	0.93562	0.059605	0.070338	-0.60365	-8.7219	0.018102	0.36318	2.74e-18	3.03e-18
MBD6	5	-0.00093229	-0.024	0.55597	0.96337	0.98085	0.98265	2.5768	67.499	0.056461	0.5424	0	0
FBXO46	5	0.5744	15.006	0.22621	0.83267	6.71e-51	5.42e-50	1.8901	48.564	0.52444	0.95304	0	0
POLE3	5	-0.9374	-21.242	0.010395	0.21717	3.92e-100	9.63e-99	0.36027	7.5416	0.10822	0.68063	4.64e-14	5.08e-14
GUCA1B	5	0.10772	2.7994	0.79792	0.98428	0.0051193	0.0066208	1.9297	50.057	0.47915	0.94096	0	0
OXTR	5	0.2988	7.8545	0.73301	0.97993	4.01e-15	9.64e-15	1.4795	38.039	0.9387	0.99718	0	0
ZNF512B	5	0.065813	1.693	0.69923	0.97759	0.090455	0.10486	2.1341	55.256	0.27702	0.86754	0	0
PIP4K2C	5	0.35004	8.5865	0.61299	0.97329	8.97e-18	2.4e-17	1.7432	41.649	0.70943	0.98166	0	0
MYOF	5	0.1277	3.1993	0.84627	0.98892	0.0013774	0.0018534	1.8879	47.069	0.52745	0.95475	0	0
CTF1	5	-0.020192	-0.49443	0.51877	0.95738	0.621	0.64728	1.7654	43.051	0.68009	0.98041	0	0
FCGBP	5	0.22341	5.5795	0.91847	0.99473	2.41e-08	4.24e-08	1.2486	29.863	0.65501	0.97732	5.88e-196	9.82e-196
GDF2	5	0.3461	8.9379	0.62264	0.97483	3.97e-19	1.12e-18	2.136	55.019	0.27536	0.8665	0	0
DPP10	5	0.13024	3.4055	0.85211	0.98966	0.00066051	0.00090692	0.94981	23.803	0.37607	0.91159	3.11e-125	4.36e-125
SPACA4	5	0.24013	6.1059	0.87618	0.99286	1.02e-09	1.92e-09	1.9556	49.441	0.44988	0.93689	0	0
CDH11	5	-0.092384	-2.2353	0.39679	0.93421	0.025401	0.031045	1.4419	34.224	0.89015	0.99306	1.08e-256	2.13e-256
ARHGAP18	5	-0.35256	-9.0237	0.13102	0.71754	1.82e-19	5.21e-19	2.0201	52.548	0.3834	0.91383	0	0
TP73	5	0.0821	2.0669	0.7363	0.97995	0.038745	0.046523	0.75965	18.183	0.25525	0.85874	6.98e-74	8.78e-74
TNNT3	5	-0.37437	-8.5174	0.11912	0.69789	1.63e-17	4.32e-17	2.0905	48.639	0.31473	0.88701	0	0
C16orf78	5	0.42044	10.366	0.46507	0.95066	3.54e-25	1.26e-24	2.0913	51.181	0.31389	0.88667	0	0
BPGM	5	0.29425	7.0204	0.74379	0.98069	2.21e-12	4.7e-12	0.72262	15.563	0.23542	0.84492	1.29e-54	1.56e-54
SH3TC2	5	0.16061	4.1469	0.92553	0.99473	3.37e-05	5.04e-05	0.89909	21.782	0.33886	0.8956	3.44e-105	4.61e-105
STT3B	5	0.028809	0.72312	0.61762	0.97346	0.4696	0.499	2.3621	59.717	0.13029	0.72477	0	0
GOLGA1	5	0.17709	4.341	0.96687	0.99767	1.42e-05	2.17e-05	1.6372	39.175	0.85179	0.99087	0	0
INPP5K	5	0.38649	10.105	0.53297	0.95851	5.27e-24	1.79e-23	2.0289	52.679	0.37439	0.91159	0	0
SYAP1	5	0.31351	7.9031	0.69792	0.97759	2.72e-15	6.58e-15	1.9688	49.157	0.4357	0.93347	0	0
ASB10	5	0.66288	16.608	0.14019	0.73738	6.08e-62	6.73e-61	1.5002	36.31	0.96666	0.99835	1.12e-288	2.44e-288
TUSC1	5	0.11409	2.9622	0.81333	0.98511	0.0030547	0.0040161	1.6055	41.189	0.89388	0.99351	0	0
NCCRP1	5	-0.31161	-7.8111	0.15631	0.75675	5.67e-15	1.35e-14	1.7283	43.506	0.7282	0.9818	0	0
RALA	5	-0.23575	-5.5685	0.21879	0.82927	2.57e-08	4.51e-08	1.8172	43.433	0.61403	0.96957	0	0
NRG1	18	0.21104	10.093	0.94908	0.99561	5.92e-24	2e-23	1.7407	81.901	0.71269	0.9818	0	0
ESX1	5	0.04147	1.0974	0.64414	0.97483	0.27246	0.29927	1.4433	37.673	0.89201	0.99306	1.3556e-310	3.1892e-310
CYorf17	5	0.26918	6.7108	0.80362	0.98428	1.94e-11	3.94e-11	1.4601	35.55	0.91413	0.99519	8.25e-277	1.74e-276
LCLAT1	5	-0.75659	-17.256	0.021634	0.3183	1.01e-66	1.25e-65	1.6749	38.92	0.80124	0.98659	0	0
SLC43A2	5	0.46696	12.166	0.38161	0.92608	4.69e-34	2.31e-33	2.1494	55.693	0.26448	0.86072	0	0
SLC15A4	5	-0.026918	-0.65541	0.50658	0.95634	0.51221	0.54076	1.6168	38.792	0.87904	0.99277	0	0
TRABD2A	5	0.34328	8.4555	0.6293	0.97483	2.78e-17	7.3e-17	2.05	50.07	0.35346	0.90122	0	0
FAM65A	5	0.10829	2.7563	0.79944	0.98428	0.0058467	0.0075301	1.7491	44.088	0.7017	0.98041	0	0
FOXA1	5	0.069954	1.7468	0.70846	0.97763	0.080672	0.094021	1.3413	32.513	0.76387	0.98621	6.88e-232	1.27e-231
SCAMP2	5	0.63361	14.313	0.16461	0.76764	1.81e-46	1.29e-45	1.4512	31.17	0.90238	0.9945	2.71e-213	4.74e-213
THEM4	5	-0.080996	-1.7785	0.41488	0.93607	0.075325	0.088057	2.0875	46.854	0.31753	0.88795	0	0
ARMC8	5	0.18275	4.5993	0.98082	0.99867	4.24e-06	6.66e-06	2.7501	70.635	0.027309	0.41726	0	0
WFDC8	5	0.088296	1.8696	0.75124	0.98129	0.061537	0.072537	1.6473	33.937	0.83819	0.98873	1.91e-252	3.72e-252
SLC31A1	5	-0.26292	-4.8226	0.19536	0.80915	1.42e-06	2.28e-06	0.78677	12.922	0.26961	0.86246	3.36e-38	3.92e-38
MTCP1	5	0.32134	8.0136	0.68025	0.9768	1.11e-15	2.73e-15	0.7599	17.478	0.25536	0.85874	2.1e-68	2.61e-68
USP27X	5	0.3685	9.3195	0.57111	0.96365	1.17e-20	3.5e-20	1.4454	35.29	0.8946	0.9937	8.46e-273	1.76e-272
TMEM201	5	-0.65087	-16.469	0.034072	0.41403	6.14e-61	6.59e-60	-1.7002	-25.662	0.0056527	0.29318	3.1e-145	4.55e-145
GPR150	5	0.086122	2.2532	0.7461	0.98069	0.024244	0.02968	1.8631	48.632	0.55754	0.96183	0	0
STRA6	5	0.56504	14.511	0.23797	0.84723	1.03e-47	7.7e-47	1.7482	44.1	0.70265	0.98041	0	0
FGF19	5	0.35177	9.2683	0.60922	0.97221	1.89e-20	5.62e-20	1.5536	40.172	0.96263	0.99835	0	0
MSANTD4	5	-0.14986	-3.0455	0.31471	0.8975	0.0023231	0.0030787	0.32831	5.4474	0.10019	0.66016	5.11e-08	5.46e-08
HCFC2	5	0.29826	7.8213	0.73443	0.97993	5.23e-15	1.25e-14	0.7664	18.793	0.25899	0.85952	8.55e-79	1.09e-78
STXBP5	5	-0.30943	-6.9577	0.15767	0.75675	3.46e-12	7.28e-12	1.2817	28.28	0.692	0.98041	6.07e-176	9.61e-176
C9orf171	5	0.36341	9.4706	0.58259	0.96636	2.78e-21	8.53e-21	2.0207	52.324	0.38296	0.91357	0	0
KCNK1	5	0.37754	9.8556	0.55167	0.96185	6.49e-23	2.11e-22	1.5869	40.498	0.9185	0.99573	0	0
DEFB124	3	0.14853	3.0032	0.89632	0.99436	0.0026713	0.0035241	2.191	44.459	0.23402	0.84305	0	0
NAPB	5	-0.56937	-11.076	0.049675	0.50006	1.63e-28	6.59e-28	0.80688	14.966	0.28066	0.86837	1.22e-50	1.46e-50
CD84	7	0.22675	5.891	0.90996	0.99436	3.84e-09	7.02e-09	1.9031	48.885	0.50986	0.94814	0	0
CALML4	10	0.27111	9.543	0.79898	0.98428	1.39e-21	4.31e-21	1.2316	41.309	0.63599	0.97304	0	0
CHAMP1	5	-0.766	-16.994	0.020901	0.31329	9.09e-65	1.07e-63	2.8364	69.013	0.018224	0.36318	0	0
WDR88	5	0.24445	6.337	0.8649	0.99054	2.34e-10	4.53e-10	1.3549	34.176	0.78091	0.98659	5.49e-256	1.08e-255
TMEM212	5	0.084321	1.875	0.74175	0.98055	0.060798	0.071694	1.1739	24.235	0.57432	0.9642	9.54e-130	1.35e-129
ZFYVE1	5	0.15001	3.5042	0.90006	0.99436	0.00045805	0.00063517	1.1811	26.465	0.58193	0.9654	2.47e-154	3.7e-154
FOXL1	5	0.12778	3.2266	0.8464	0.98892	0.0012528	0.0016901	1.798	45.052	0.63827	0.97375	0	0
ZNF367	5	0.29615	6.7631	0.73943	0.98044	1.35e-11	2.77e-11	-0.025103	-0.42754	0.047443	0.51039	0.66899	0.67223
TMEM117	5	-0.47462	-10.382	0.07624	0.59609	3e-25	1.07e-24	0.80355	16.578	0.27884	0.86837	1.01e-61	1.23e-61
NPPA	5	-0.11365	-2.805	0.36416	0.92155	0.0050315	0.0065118	0.5043	11.181	0.14809	0.75053	5.07e-29	5.79e-29
ADCY8	5	0.37931	9.4374	0.54804	0.96026	3.82e-21	1.17e-20	0.93419	21.309	0.36435	0.90655	9.45e-101	1.26e-100
CORIN	5	-0.33596	-7.7865	0.14084	0.73806	6.89e-15	1.64e-14	1.8484	43.576	0.57532	0.96462	0	0
FRA10AC1	5	-1.3481	-24.223	0.0029208	0.11715	1.27e-129	5e-128	2.5276	53.379	0.069376	0.58413	0	0
ZNF74	5	0.4463	11.481	0.41671	0.93607	1.64e-30	7.09e-30	1.2868	31.583	0.69786	0.98041	6.27e-219	1.11e-218
NUDT11	3	0.46136	8.3467	0.39094	0.9309	7.02e-17	1.81e-16	0.83244	13.106	0.29627	0.8792	3.04e-39	3.55e-39
COL20A1	5	0.11793	3.0252	0.82202	0.98661	0.002485	0.003286	2.6465	69.073	0.042023	0.48846	0	0
FAM71A	5	-0.11345	-2.8235	0.3645	0.92155	0.0047505	0.0061602	1.6899	41.884	0.78119	0.98659	0	0
TSC22D3	13	0.47595	19.059	0.36686	0.923	5.54e-81	9.42e-80	1.4212	54.362	0.86326	0.99172	0	0
OSBP2	5	0.065372	1.6487	0.69823	0.97759	0.099199	0.11453	1.4436	35.704	0.89234	0.99306	3.44e-279	7.3e-279
THUMPD3	5	-0.061206	-1.5164	0.4471	0.94426	0.12941	0.14769	0.94175	21.923	0.3697	0.90995	1.55e-106	2.09e-106
ZADH2	5	0.35966	9.1939	0.59113	0.96908	3.79e-20	1.11e-19	1.7946	45.032	0.64246	0.97509	0	0
SLC9A8	5	-0.11637	-2.6688	0.36061	0.92053	0.0076125	0.0097161	2.4454	57.869	0.095985	0.65206	0	0
CMPK2	5	0.36558	8.6909	0.57802	0.96636	3.59e-18	9.78e-18	2.1961	52.154	0.22979	0.83811	0	0
FMN1	11	0.063887	2.2786	0.69473	0.97759	0.02269	0.027835	1.7158	60.375	0.74529	0.98409	0	0
PDHB	5	-1.0826	-26.38	0.0060636	0.16451	2.33e-153	1.22e-151	-1.5454	-25.826	0.0067189	0.30654	4.56e-147	6.74e-147
CSRP2BP	5	0.62162	14.968	0.17606	0.78132	1.19e-50	9.51e-50	0.042104	0.73245	0.054117	0.53491	0.4639	0.46779
LARGE	5	-0.46294	-11.732	0.080382	0.60926	8.72e-32	3.97e-31	0.88673	21.793	0.33078	0.89278	2.73e-105	3.66e-105
ZNF333	5	0.51062	12.648	0.31171	0.89601	1.15e-36	6.12e-36	0.42752	8.6409	0.1257	0.71753	5.58e-18	6.17e-18
ZNF114	5	-0.20075	-4.7532	0.25474	0.86249	2e-06	3.19e-06	1.899	45.32	0.51435	0.94861	0	0
TMEM220	5	-0.13957	-2.8552	0.32789	0.90526	0.0043004	0.0055906	2.0617	42.684	0.34187	0.89693	0	0
KRT84	5	0.42959	10.351	0.44772	0.94437	4.13e-25	1.47e-24	1.7203	40.049	0.73872	0.98342	0	0
TMEM169	5	0.66343	16.371	0.13989	0.73673	3.07e-60	3.23e-59	1.1639	26.486	0.56338	0.96223	1.41e-154	2.12e-154
ANAPC1	4	0.14905	2.1675	0.89761	0.99436	0.030193	0.036671	1.0285	12.758	0.43937	0.93481	2.82e-37	3.28e-37
ITSN2	5	0.28217	6.1666	0.77275	0.9835	6.98e-10	1.32e-09	3.0355	70.11	0.0077517	0.30654	0	0
BPI	5	0.46004	11.581	0.39319	0.9321	5.16e-31	2.27e-30	1.7684	43.581	0.676	0.98041	0	0
FAM168B	5	0.89146	22.888	0.035793	0.42462	6.16e-116	2e-114	2.1097	52.963	0.29736	0.88021	0	0
CXCR6	5	-0.070383	-1.7932	0.43185	0.94022	0.072947	0.085405	1.4934	37.564	0.9576	0.99817	0	0
IFFO2	5	0.39065	10.302	0.52428	0.95755	6.92e-25	2.43e-24	2.1814	57.441	0.24065	0.84877	0	0
B3GAT2	5	0.42218	11.039	0.46172	0.95034	2.49e-28	9.95e-28	1.2489	31.343	0.65531	0.97732	1.22e-215	2.15e-215
MTERF	5	-0.049411	-1.1664	0.46638	0.95066	0.24344	0.2693	1.8995	45.062	0.51393	0.94861	0	0
SLC30A1	5	-0.37942	-9.9629	0.11659	0.6935	2.21e-23	7.35e-23	2.0196	53.508	0.38391	0.91384	0	0
GBF1	5	0.31342	6.3009	0.69823	0.97759	2.96e-10	5.69e-10	1.4288	26.424	0.8732	0.99203	7.25e-154	1.09e-153
KIF21B	5	0.32356	8.0912	0.67525	0.97613	5.91e-16	1.47e-15	1.8128	44.803	0.61938	0.97155	0	0
EPM2A	5	0.57342	13.037	0.22746	0.83451	7.57e-39	4.31e-38	0.88412	18.007	0.32904	0.89187	1.73e-72	2.16e-72
IMMP1L	5	-0.029707	-0.65438	0.50153	0.95502	0.51287	0.5414	0.74574	14.204	0.24775	0.85544	8.63e-46	1.02e-45
PI4KA	5	0.084894	1.9837	0.74295	0.98069	0.047289	0.056411	1.2263	27.001	0.63007	0.97217	1.43e-160	2.17e-160
FAM154A	5	0.24525	5.3983	0.86298	0.99054	6.73e-08	1.16e-07	0.9013	17.981	0.34065	0.8967	2.72e-72	3.41e-72
HNRNPH2	5	-0.16102	-4.0979	0.30081	0.89319	4.17e-05	6.2e-05	1.514	38.156	0.98445	0.99842	0	0
MYO7A	5	-0.12281	-3.0833	0.35159	0.91931	0.0020472	0.0027229	2.1036	53.46	0.30286	0.8847	0	0
SPATA25	5	-0.049183	-1.239	0.46679	0.95066	0.21536	0.23964	1.4254	35.204	0.86871	0.99174	1.75e-271	3.62e-271
C9	5	-0.1345	-3.2642	0.33489	0.91245	0.0010976	0.0014859	2.0569	50.766	0.34659	0.8978	0	0
CNTN2	5	-0.077341	-1.8188	0.42079	0.93787	0.068941	0.080885	1.4589	33.689	0.91247	0.99519	8.44e-249	1.63e-248
TGM1	5	0.53734	12.315	0.27404	0.87767	7.53e-35	3.81e-34	1.9546	43.966	0.45109	0.93702	0	0
LRRC70	5	-0.20061	-4.488	0.25486	0.86261	7.19e-06	1.11e-05	1.7884	40.36	0.65012	0.97693	0	0
XRN1	5	0.15937	3.5906	0.92252	0.99473	0.00032993	0.00046164	0.50775	9.5846	0.14936	0.75387	9.28e-22	1.04e-21
TRPV3	5	0.40201	10.52	0.50139	0.95502	6.96e-26	2.55e-25	2.1856	57.054	0.23769	0.84645	0	0
TIMM21	5	0.051653	1.2404	0.66679	0.97606	0.21484	0.23912	2.2488	54.674	0.19404	0.81227	0	0
ZNF672	5	0.27862	7.1917	0.78065	0.9835	6.4e-13	1.39e-12	1.8238	46.538	0.60546	0.96733	0	0
SEC61A2	5	0.0055297	0.13631	0.56865	0.96365	0.89158	0.90169	1.9504	48.229	0.45592	0.93789	0	0
KLHL17	5	-0.36401	-9.2105	0.12452	0.70468	3.25e-20	9.57e-20	1.1523	28.641	0.5521	0.96153	2.05e-180	3.29e-180
SPRY4	5	0.20683	5.2614	0.95895	0.99708	1.43e-07	2.42e-07	1.6951	42.508	0.77404	0.98659	0	0
OPRK1	5	0.054545	1.3726	0.67359	0.97606	0.16987	0.19152	1.6529	41.159	0.83052	0.98873	0	0
AEBP1	5	0.33088	8.1926	0.65785	0.97493	2.56e-16	6.43e-16	1.7679	42.995	0.67653	0.98041	0	0
GALNTL5	5	0.39294	8.0519	0.5195	0.95738	8.15e-16	2.01e-15	1.8551	36.954	0.56717	0.9636	6.28e-299	1.42e-298
PADI2	5	-0.16194	-4.1167	0.29957	0.892	3.84e-05	5.72e-05	1.097	26.896	0.49947	0.94645	2.46e-159	3.74e-159
SAMD4A	6	0.37275	10.765	0.56184	0.96337	5.04e-27	1.93e-26	1.2896	36.062	0.70072	0.98041	8.98e-285	1.94e-284
ADH1B	5	0.16424	4.1839	0.93482	0.99473	2.87e-05	4.3e-05	1.4508	36.031	0.90185	0.9945	2.7e-284	5.82e-284
ARSB	5	-0.035271	-0.78216	0.4913	0.95389	0.43412	0.46385	2.2297	50.58	0.20686	0.82115	0	0
BTN2A2	16	0.27897	11.868	0.77994	0.9835	1.74e-32	8.12e-32	1.6155	66.448	0.88069	0.99296	0	0
GPS1	5	0.15723	2.8086	0.91737	0.99473	0.0049751	0.006443	2.6918	50.803	0.034738	0.45399	0	0
HLA-DPB1	5	0.12	3.0035	0.82705	0.98661	0.0026692	0.0035216	0.738	17.335	0.2436	0.85036	2.58e-67	3.21e-67
KPNA5	5	0.42091	9.6793	0.46408	0.95066	3.69e-22	1.17e-21	1.5214	32.805	0.99458	0.99929	5.07e-236	9.49e-236
CSDE1	5	-1.248	-28.366	0.003787	0.13117	5.34e-177	3.47e-175	1.0839	25.559	0.48778	0.94153	4.33e-144	6.35e-144
DNAH10	5	0.22889	5.7589	0.90456	0.99436	8.47e-09	1.52e-08	0.90778	21.412	0.34527	0.89736	1.04e-101	1.38e-101
ZNF445	5	-0.41926	-10.123	0.098084	0.65149	4.36e-24	1.49e-23	1.534	37.134	0.98902	0.99928	7.93e-302	1.81e-301
PALB2	5	-0.27509	-6.4145	0.18479	0.79517	1.41e-10	2.76e-10	1.6883	39.603	0.7833	0.98659	0	0
ZSWIM1	5	0.0069948	0.17628	0.57158	0.96409	0.86007	0.87287	0.58067	13.374	0.17505	0.78692	8.59e-41	1.01e-40
FAM218A	5	0.18667	4.7883	0.99073	0.99876	1.68e-06	2.69e-06	1.713	43.423	0.7496	0.98497	0	0
HIPK1	5	0.58816	13.808	0.21025	0.8206	2.28e-43	1.5e-42	0.6117	11.825	0.18702	0.80334	2.9e-32	3.34e-32
DDX25	5	-0.19916	-4.5332	0.25641	0.86412	5.81e-06	9.04e-06	1.6611	37.758	0.81905	0.98804	0	0
RXFP1	5	0.60987	14.345	0.18707	0.79788	1.14e-46	8.2e-46	1.7102	38.607	0.75346	0.98503	0	0
RAB8B	5	0.05407	1.1374	0.67246	0.97606	0.25535	0.28161	1.6066	32.955	0.89248	0.99306	3.62e-238	6.81e-238
SRCIN1	5	0.27725	7.0416	0.78423	0.98425	1.9e-12	4.05e-12	2.4719	63.401	0.086368	0.63104	0	0
CTRB2	5	0.18249	4.7303	0.98018	0.99859	2.24e-06	3.57e-06	1.6709	42.884	0.80642	0.98659	0	0
HPS3	5	0.032046	0.77712	0.62402	0.97483	0.43709	0.46674	1.5916	38.03	0.91201	0.99519	0	0
SPATA18	5	0.2302	5.7403	0.90162	0.99436	9.45e-09	1.69e-08	2.208	55.255	0.2215	0.83439	0	0
SPDYE4	4	0.34016	7.595	0.63664	0.97483	3.08e-14	7.12e-14	-0.41643	-7.2061	0.023677	0.39776	5.76e-13	6.27e-13
UNC13D	5	-0.1389	-3.5502	0.32887	0.90671	0.000385	0.00053627	1.9183	49.364	0.49207	0.94343	0	0
TTC31	5	0.16233	3.9392	0.92972	0.99473	8.18e-05	0.00011938	2.5927	64.349	0.052985	0.53212	0	0
SMIM18	5	0.012239	0.25625	0.58275	0.96636	0.79776	0.81417	1.9575	41.131	0.44796	0.93689	0	0
SRGAP3	5	0.60507	15.282	0.19212	0.80563	1e-52	8.56e-52	2.0095	50.192	0.3935	0.91844	0	0
PTGER2	5	0.59791	15.728	0.19987	0.81324	9.67e-56	8.96e-55	1.2372	31.074	0.64217	0.97509	5.46e-212	9.52e-212
ASTN2	14	0.43405	17.531	0.43962	0.94243	8.28e-69	1.07e-67	0.86614	32.082	0.31775	0.88795	7.87e-226	1.43e-225
SAPCD2	5	0.18033	4.4593	0.97482	0.99833	8.22e-06	1.27e-05	1.2913	30.846	0.70282	0.98041	6.25e-209	1.08e-208
RGS4	12	-0.0077899	-0.26622	0.54256	0.95988	0.79007	0.80705	1.9076	65.329	0.50469	0.94737	0	0
BANF2	6	0.4305	12.187	0.44588	0.94333	3.65e-34	1.8e-33	1.4131	38.48	0.85316	0.99087	0	0
FGF4	5	0.076126	1.8369	0.72263	0.97959	0.066218	0.077851	1.8841	45.372	0.53227	0.95483	0	0
CDKN1B	5	0.39149	9.7221	0.52256	0.95738	2.43e-22	7.76e-22	1.2341	28.851	0.63891	0.97375	4.89e-183	7.9e-183
SRRM2	5	0.46231	10.79	0.38954	0.93033	3.83e-27	1.47e-26	2.029	46.588	0.37434	0.91159	0	0
SORT1	5	0.16988	4.277	0.94856	0.99561	1.89e-05	2.87e-05	0.94281	21.945	0.37054	0.91035	9.58e-107	1.29e-106
CALR3	5	-0.52373	-11.541	0.060925	0.54219	8.22e-31	3.6e-30	1.4016	31.03	0.83934	0.98896	2.12e-211	3.69e-211
AJAP1	5	0.18931	4.9543	0.99751	0.99976	7.26e-07	1.19e-06	1.2273	31.013	0.63127	0.97217	3.65e-211	6.35e-211
PSMD8	5	0.32372	7.3733	0.6748	0.97613	1.66e-13	3.72e-13	1.2853	27.95	0.69627	0.98041	6.67e-172	1.05e-171
MON1B	5	0.35931	9.3605	0.59205	0.96908	7.93e-21	2.39e-20	2.7151	71.461	0.031495	0.43597	0	0
LRRC34	5	0.18903	4.1309	0.99678	0.99972	3.61e-05	5.39e-05	1.7645	37.822	0.68138	0.98041	0	0
ENHO	5	0.67368	17.002	0.13187	0.7192	8e-65	9.46e-64	1.4332	34.117	0.87896	0.99277	4.09e-255	8.05e-255
RASA3	5	0.16791	4.3552	0.94364	0.99507	1.33e-05	2.03e-05	1.1246	28.002	0.52537	0.95359	1.52e-172	2.39e-172
ZBTB16	5	0.089534	2.2954	0.75426	0.98201	0.021711	0.026675	1.9513	49.99	0.45484	0.93789	0	0
PINK1	5	0.16315	4.2271	0.93191	0.99473	2.37e-05	3.57e-05	0.9161	22.41	0.35116	0.90091	3.18e-111	4.32e-111
TMEM55A	5	0.38357	9.4712	0.53893	0.95953	2.77e-21	8.48e-21	2.5115	62.635	0.074185	0.60452	0	0
CAMK1G	5	0.049714	1.2549	0.66222	0.9756	0.2095	0.23352	1.8383	46.227	0.58833	0.9654	0	0
CLDN11	5	0.33371	8.6052	0.65161	0.97483	7.62e-18	2.04e-17	1.6581	42.062	0.82384	0.98817	0	0
TMEM233	5	0.16219	4.1412	0.9293	0.99473	3.45e-05	5.16e-05	1.1783	28.989	0.57904	0.9654	8.99e-185	1.46e-184
NR2C2	5	-0.058158	-1.4719	0.45216	0.94741	0.14105	0.16034	2.0819	53.241	0.32259	0.89056	0	0
IFLTD1	5	0.18534	4.5019	0.98731	0.99876	6.74e-06	1.04e-05	2.4031	59.259	0.11227	0.6898	0	0
USP6NL	5	0.30867	6.9799	0.70986	0.97769	2.95e-12	6.24e-12	1.515	33.204	0.98587	0.99872	9.37e-242	1.78e-241
CHD7	5	-1.7033	-37.451	0.0014104	0.093382	5.84e-307	1.25e-304	-0.60659	-11.773	0.01808	0.36318	5.36e-32	6.16e-32
USP3	5	0.70366	17.31	0.11092	0.67997	3.97e-67	4.96e-66	2.5039	61.384	0.076473	0.61019	0	0
FARP2	5	0.37258	9.0557	0.56216	0.96337	1.36e-19	3.91e-19	0.53388	11.505	0.15811	0.76687	1.25e-30	1.43e-30
OAS3	5	0.28435	7.3467	0.76747	0.98338	2.03e-13	4.52e-13	1.428	35.816	0.87222	0.992	6.24e-281	1.33e-280
NT5DC3	5	0.45883	11.238	0.3952	0.9328	2.66e-29	1.1e-28	1.0046	22.071	0.41955	0.92935	6.01e-108	8.1e-108
LRRC36	5	0.26157	6.2079	0.82268	0.98661	5.37e-10	1.02e-09	1.1496	24.889	0.54954	0.96091	9.79e-137	1.41e-136
ULBP2	4	0.091515	1.9823	0.75913	0.98201	0.047443	0.056586	-0.22919	-3.8761	0.032239	0.43867	0.00010612	0.00011118
ZNF555	5	0.1602	3.5847	0.92456	0.99473	0.00033751	0.00047181	1.8089	39.952	0.62443	0.97217	0	0
HOXC12	5	0.3416	8.9967	0.63332	0.97483	2.33e-19	6.63e-19	1.198	30.45	0.59962	0.96572	1.19e-203	2.03e-203
NPRL2	5	1.271	31.134	0.0038869	0.13158	8.27e-213	7.76e-211	1.3166	28.185	0.73341	0.98215	8.91e-175	1.41e-174
SNX19	5	0.4311	10.157	0.44474	0.94278	3.1e-24	1.06e-23	0.25414	4.9455	0.085124	0.63033	7.6e-07	8.06e-07
NDRG3	5	-0.1586	-3.5825	0.30408	0.89568	0.00034033	0.00047549	1.2554	27.597	0.66242	0.97894	1.23e-167	1.9e-167
SPDEF	5	0.26092	6.3592	0.82434	0.98661	2.03e-10	3.94e-10	1.2294	28.663	0.63349	0.97219	1.1e-180	1.77e-180
IL21R	5	1.2306	29.554	0.0048198	0.14838	5.82e-192	4.5e-190	1.4842	32.354	0.94495	0.99718	1.21e-229	2.22e-229
PSTPIP1	5	0.10327	2.5861	0.78711	0.98425	0.0097069	0.012278	2.7425	70.46	0.028175	0.42053	0	0
SH3YL1	5	0.17746	4.2781	0.96771	0.99767	1.88e-05	2.86e-05	2.6777	66.43	0.037137	0.46412	0	0
KRT1	5	0.54623	12.475	0.2621	0.86974	1.02e-35	5.31e-35	1.9374	43.079	0.47033	0.93793	0	0
ANKRD37	5	0.098578	2.5732	0.77611	0.9835	0.010077	0.012722	2.3248	61.193	0.14934	0.75387	0	0
KCNK16	5	0.093765	2.3759	0.7645	0.98305	0.017505	0.021675	1.8599	46.958	0.56109	0.96223	0	0
INPP1	5	0.21494	5.0492	0.93952	0.99473	4.44e-07	7.33e-07	2.0765	48.707	0.32782	0.89168	0	0
ZNF513	5	0.057863	1.4399	0.68059	0.9768	0.1499	0.16999	0.81199	18.813	0.28388	0.87049	5.94e-79	7.54e-79
ZNF33B	5	-0.12216	-2.3575	0.35237	0.91931	0.018396	0.022735	0.77068	13.618	0.26137	0.85952	3.14e-42	3.7e-42
PPAPDC3	5	0.57643	15.077	0.22365	0.83154	2.28e-51	1.86e-50	0.61415	14.55	0.18803	0.80528	5.8e-48	6.89e-48
CNGA3	5	-0.16738	-4.1374	0.29294	0.88817	3.51e-05	5.24e-05	1.7679	43.82	0.67647	0.98041	0	0
DZIP1	5	0.75821	19.212	0.08076	0.60988	2.94e-82	5.16e-81	1.8307	44.869	0.59735	0.9654	0	0
ZNF345	5	0.085903	1.9095	0.74546	0.98069	0.056193	0.066508	1.063	20.882	0.46869	0.93789	7.76e-97	1.02e-96
MAGEA2	3	0.033347	0.61829	0.62695	0.97483	0.53638	0.5645	1.6189	29.618	0.87594	0.99206	8.88e-193	1.47e-192
NPR1	5	0.19291	5.0533	0.99327	0.99878	4.34e-07	7.18e-07	2.1546	56.555	0.26058	0.85952	0	0
NOXRED1	5	-0.072574	-1.5986	0.42839	0.94019	0.10991	0.12631	0.95509	19.224	0.38001	0.9126	2.35e-82	3e-82
PLEKHH1	5	0.044462	1.1475	0.65069	0.97483	0.25119	0.27741	1.7959	46.141	0.64091	0.9747	0	0
DMRT2	8	0.10997	3.5344	0.80339	0.98428	0.00040863	0.00056827	1.8516	59.187	0.57164	0.9642	0	0
ANXA8L1	4	0.16552	3.7971	0.93795	0.99473	0.00014639	0.00021019	1.5066	34.064	0.9752	0.99835	2.54e-254	4.99e-254
MKL1	5	0.14719	3.7934	0.89291	0.99436	0.00014858	0.00021326	1.4244	35.986	0.86742	0.99172	1.4e-283	3e-283
IL11	8	0.38697	12.165	0.53201	0.95851	4.78e-34	2.35e-33	1.6673	50.991	0.81104	0.98659	0	0
GPBP1	5	-1.0294	-21.89	0.0073186	0.17956	3.2e-106	8.8e-105	0.27022	5.4089	0.088111	0.63262	6.34e-08	6.77e-08
RSAD1	5	0.023837	0.60908	0.60716	0.97185	0.54247	0.57047	1.2106	29.876	0.61343	0.96957	4.02e-196	6.72e-196
DND1	5	0.30789	7.7155	0.71144	0.97771	1.21e-14	2.83e-14	1.7985	44.398	0.63763	0.97371	0	0
PDZD11	5	0.38711	9.0122	0.5317	0.95851	2.02e-19	5.77e-19	2.5077	59.094	0.07534	0.60823	0	0
TPST1	5	0.36237	8.6478	0.58487	0.96683	5.25e-18	1.42e-17	0.33615	6.6593	0.1021	0.66383	2.75e-11	2.98e-11
HAND2	5	0.5038	13.402	0.32266	0.90118	5.86e-41	3.58e-40	0.86803	21.868	0.31885	0.88819	5.23e-106	7.02e-106
ARTN	5	0.079297	1.9796	0.72947	0.97966	0.047753	0.056941	1.407	34.101	0.84611	0.99022	7.24e-255	1.42e-254
TALDO1	5	-0.79725	-19.184	0.018102	0.29369	5.08e-82	8.86e-81	0.88887	21.056	0.33223	0.89368	2.02e-98	2.67e-98
TSPAN4	5	0.6399	15.379	0.15911	0.75885	2.27e-53	1.96e-52	1.1974	27.229	0.59886	0.96572	2.92e-163	4.47e-163
NFIC	5	0.16301	4.3361	0.93148	0.99473	1.45e-05	2.21e-05	1.0452	27.091	0.45308	0.93773	1.26e-161	1.93e-161
ACY3	5	0.70928	18.421	0.10762	0.67622	8.93e-76	1.36e-74	-0.14328	-2.923	0.037703	0.46603	0.0034666	0.0035929
AGBL1	5	0.23637	5.7597	0.88542	0.99433	8.43e-09	1.52e-08	0.68822	14.972	0.21903	0.83184	1.12e-50	1.35e-50
RSPH1	5	0.031892	0.75899	0.6237	0.97483	0.44786	0.47736	1.5859	36.93	0.91962	0.99573	1.5e-298	3.38e-298
TMEM109	5	0.068194	1.5954	0.70451	0.97763	0.11061	0.12707	0.66203	14.208	0.20766	0.82207	8.15e-46	9.64e-46
PHIP	5	-0.64696	-15.552	0.034583	0.41659	1.54e-54	1.38e-53	0.078561	1.6884	0.058004	0.54806	0.091342	0.093306
KCNS2	5	-0.081053	-1.9794	0.41481	0.93607	0.047767	0.05695	1.8377	44.974	0.58904	0.9654	0	0
FTCD	5	0.47739	12.374	0.36456	0.92159	3.6e-35	1.84e-34	0.96488	23.318	0.38776	0.91513	2.92e-120	4.05e-120
LINGO4	5	-0.1708	-4.3139	0.28936	0.88726	1.6e-05	2.44e-05	1.3292	33.052	0.74916	0.98497	1.45e-239	2.74e-239
MPC2	5	-0.74774	-17.216	0.022544	0.32716	2e-66	2.47e-65	0.44645	9.5741	0.1311	0.72622	1.03e-21	1.15e-21
SLA	10	-0.010904	-0.37285	0.53638	0.95851	0.70926	0.73135	1.5376	51.503	0.9841	0.99842	0	0
PRTG	5	0.053308	1.1994	0.67048	0.97606	0.23036	0.25556	2.501	58.406	0.077339	0.61465	0	0
ANKRD55	5	0.51478	12.836	0.30558	0.89601	1.03e-37	5.66e-37	1.9689	48.313	0.43552	0.93347	0	0
GRIA2	5	0.26665	6.2439	0.80977	0.98511	4.27e-10	8.16e-10	1.5453	34.85	0.9738	0.99835	4.32e-266	8.81e-266
ALDH1A1	5	0.37015	9.5713	0.56704	0.96337	1.06e-21	3.3e-21	1.7625	44.766	0.68389	0.98041	0	0
ZAR1L	5	0.1312	3.425	0.85415	0.99005	0.00061486	0.00084584	1.165	29.363	0.56476	0.9626	1.63e-189	2.68e-189
TUBA8	5	-0.06627	-1.5233	0.43877	0.94181	0.12768	0.14583	1.7697	40.604	0.67421	0.98041	0	0
FBP2	5	0.085068	2.1096	0.74343	0.98069	0.034896	0.042116	1.2592	29.671	0.6668	0.97964	1.82e-193	3.02e-193
C19orf60	5	0.11038	2.8728	0.80432	0.98428	0.0040687	0.0052989	0.99131	24.703	0.40865	0.92559	9.89e-135	1.42e-134
MAPRE3	5	0.33958	8.935	0.63793	0.97483	4.07e-19	1.15e-18	2.0227	52.963	0.38078	0.91262	0	0
SART1	5	0.76925	16.771	0.075651	0.59338	3.95e-63	4.46e-62	1.7973	36.698	0.63934	0.97375	8e-295	1.78e-294
ADRB1	5	0.18576	4.8087	0.98835	0.99876	1.52e-06	2.44e-06	2.0954	54.289	0.31016	0.88537	0	0
FRMD3	15	0.18432	7.3535	0.98481	0.99876	1.93e-13	4.3e-13	1.3969	53.12	0.83301	0.98873	0	0
PAK4	5	0.091156	2.3067	0.75841	0.98201	0.021074	0.02592	1.2325	30.247	0.63707	0.97365	5.7e-201	9.65e-201
DIRAS2	5	0.41836	9.8319	0.46907	0.95084	8.21e-23	2.66e-22	0.01061	0.2106	0.050741	0.52277	0.8332	0.83529
HOXB3	5	0.72098	18.311	0.10043	0.66128	6.71e-75	9.99e-74	2.0081	49.893	0.39505	0.91929	0	0
DOPEY2	5	-0.14544	-3.4472	0.32017	0.8985	0.00056637	0.00078069	2.53	62.114	0.068621	0.58375	0	0
CDK5R2	5	0.38477	10.001	0.53647	0.95851	1.51e-23	5.04e-23	1.3883	34.813	0.82239	0.98817	1.53e-265	3.12e-265
IRAK1	5	0.48973	12.806	0.34431	0.91577	1.53e-37	8.35e-37	1.9864	51.386	0.41719	0.9287	0	0
OCA2	5	0.081128	2.1	0.73383	0.97993	0.035732	0.043077	1.493	38.034	0.95709	0.99817	0	0
FAM57A	5	0.59721	14.876	0.20072	0.81481	4.71e-50	3.72e-49	0.76073	16.705	0.25586	0.85912	1.2e-62	1.47e-62
PRR14	5	0.090487	2.3078	0.75664	0.98201	0.02101	0.025845	1.4181	35.343	0.85941	0.9911	1.29e-273	2.68e-273
TOB2	5	0.25128	6.3727	0.84834	0.9892	1.86e-10	3.61e-10	1.7183	42.806	0.74164	0.9839	0	0
CHN1	5	0.75939	17.557	0.080193	0.60834	5.28e-69	6.87e-68	0.81532	15.94	0.28571	0.87167	3.33e-57	4.05e-57
ENTPD6	5	0.055314	1.3537	0.67527	0.97613	0.17584	0.19795	0.4433	9.5036	0.13025	0.72477	2.03e-21	2.27e-21
LMF2	5	0.5603	13.775	0.24393	0.85521	3.59e-43	2.34e-42	1.6236	38.038	0.8699	0.99174	0	0
GFRA2	5	0.31637	8.2211	0.69163	0.97759	2.02e-16	5.1e-16	2.0762	53.763	0.32808	0.89176	0	0
PTAFR	5	-0.13743	-3.0885	0.33105	0.90813	0.0020114	0.0026773	0.90017	18.859	0.33984	0.89574	2.49e-79	3.16e-79
DLG2	8	0.32372	9.9367	0.67481	0.97613	2.88e-23	9.51e-23	1.2832	37.111	0.69371	0.98041	1.89e-301	4.29e-301
WFS1	5	-0.073814	-1.8723	0.42635	0.94003	0.061172	0.072125	1.4475	36.094	0.89747	0.99415	2.82e-285	6.1e-285
PPM1M	5	0.60707	15.69	0.18994	0.80225	1.78e-55	1.64e-54	0.9339	22.144	0.36411	0.90655	1.2e-108	1.62e-108
TXNRD2	5	0.14496	3.7694	0.88763	0.99433	0.00016367	0.00023425	1.594	40.942	0.90868	0.99482	0	0
SMPDL3B	5	-0.25237	-5.9767	0.20414	0.81656	2.28e-09	4.21e-09	1.4959	35.099	0.96124	0.99835	7.03e-270	1.45e-269
LACRT	5	0.16358	4.002	0.93299	0.99473	6.28e-05	9.24e-05	1.8565	44.944	0.56546	0.96269	0	0
GDF10	5	0.066539	1.6835	0.70091	0.97759	0.092275	0.10685	1.9055	48.145	0.50699	0.94737	0	0
RBCK1	5	0.27276	7.0702	0.79536	0.98428	1.55e-12	3.31e-12	1.5453	39.169	0.97372	0.99835	0	0
FAM65C	5	0.28507	7.373	0.76574	0.98313	1.67e-13	3.73e-13	1.6903	42.946	0.78045	0.98659	0	0
RAB21	5	0.93041	18.744	0.027964	0.37208	2.15e-78	3.5e-77	1.7918	34.782	0.6458	0.97607	4.5e-265	9.16e-265
CCDC166	5	0.1402	3.6683	0.8758	0.99286	0.00024415	0.00034532	1.1454	28.877	0.54542	0.95922	2.35e-183	3.79e-183
PTP4A2	7	-0.3959	-10.357	0.10859	0.67745	3.88e-25	1.38e-24	1.5457	40.636	0.97326	0.99835	0	0
WDR86	5	0.28815	7.4627	0.75813	0.98201	8.48e-14	1.92e-13	1.7859	45.694	0.6533	0.97712	0	0
ZMYND10	5	-0.30386	-7.4309	0.16165	0.76269	1.08e-13	2.43e-13	1.9613	49.028	0.44421	0.93654	0	0
PCBP3	5	-0.40465	-10.188	0.10457	0.6703	2.25e-24	7.75e-24	1.4987	37.766	0.96486	0.99835	0	0
ZHX1	5	-0.074365	-1.8048	0.42569	0.93972	0.071104	0.083312	1.7519	42.387	0.69787	0.98041	0	0
PABPC1L2A	2	-0.56404	-9.4717	0.050752	0.50297	2.75e-21	8.44e-21	2.4239	41.452	0.10379	0.66924	0	0
ADAMTS2	5	0.32515	8.46	0.67162	0.97606	2.67e-17	7.03e-17	1.2286	30.712	0.63269	0.97217	3.92e-207	6.74e-207
LHX8	5	-0.13526	-2.9927	0.33393	0.91091	0.0027649	0.0036438	2.1901	49.094	0.23462	0.84351	0	0
C9orf40	5	-0.037293	-0.96572	0.48769	0.95328	0.33418	0.36244	1.0575	26.624	0.46405	0.93789	3.6e-156	5.41e-156
LBP	5	0.19146	4.8419	0.99691	0.99972	1.29e-06	2.07e-06	1.9002	47.706	0.51298	0.94861	0	0
TPBGL	5	0.14694	3.8318	0.89231	0.99436	0.0001272	0.00018327	1.8775	48.733	0.54022	0.95732	0	0
PVALB	5	0.64744	14.899	0.15296	0.75402	3.36e-50	2.66e-49	1.2994	27.511	0.71255	0.9818	1.31e-166	2.03e-166
GK5	5	-0.090826	-2.2027	0.39952	0.93484	0.027619	0.033637	1.7569	42.533	0.69134	0.98041	0	0
TFDP1	5	1.1185	23.669	0.008729	0.19528	7.55e-124	2.76e-122	1.0276	16.721	0.43858	0.93471	9.19e-63	1.13e-62
FAM104B	5	-0.28451	-5.8444	0.1766	0.78316	5.08e-09	9.24e-09	1.6427	33.895	0.84417	0.98997	7.9e-252	1.54e-251
MEST	4	-0.3552	-7.4739	0.12959	0.71529	7.79e-14	1.77e-13	1.6589	35.225	0.82254	0.98817	8.17e-272	1.69e-271
ZFAT	5	-0.88447	-20.892	0.012816	0.24711	6.27e-97	1.47e-95	0.10979	2.3528	0.062247	0.56497	0.018631	0.019186
KIAA0195	5	0.41952	10.517	0.4667	0.95066	7.25e-26	2.66e-25	2.0246	50.155	0.37894	0.91211	0	0
PDK1	5	0.65056	15.631	0.15016	0.74982	4.51e-55	4.1e-54	1.021	21.66	0.43326	0.93347	4.9e-104	6.56e-104
GUCA1C	5	0.57769	11.083	0.22206	0.83154	1.51e-28	6.1e-28	1.5506	27.818	0.96663	0.99835	2.66e-170	4.15e-170
NID2	5	0.45319	11.187	0.40496	0.9351	4.72e-29	1.94e-28	1.9714	47.898	0.43282	0.93347	0	0
SLAMF8	5	0.2256	5.4765	0.91299	0.99465	4.34e-08	7.54e-08	0.33026	6.6317	0.10063	0.66016	3.32e-11	3.59e-11
FAM161A	5	0.51363	10.385	0.30717	0.89601	2.89e-25	1.03e-24	1.3513	25.582	0.77656	0.98659	2.41e-144	3.54e-144
FKBP1B	6	-0.50903	-10.878	0.064823	0.55564	1.47e-27	5.73e-27	1.867	41.437	0.55298	0.96153	0	0
VLDLR	5	0.39013	10.061	0.52535	0.95755	8.25e-24	2.78e-23	2.0678	53.044	0.33598	0.89397	0	0
CRYGN	5	-0.29687	-6.868	0.16716	0.77163	6.51e-12	1.35e-11	0.43919	9.316	0.12907	0.72465	1.21e-20	1.35e-20
C14orf177	5	-0.045421	-1.1177	0.47314	0.95186	0.2637	0.29008	1.2879	30.991	0.69881	0.98041	7.06e-211	1.23e-210
LYPD5	5	0.41162	10.362	0.48271	0.95304	3.69e-25	1.31e-24	0.6642	14.86	0.20852	0.82207	6.02e-50	7.18e-50
ABTB2	5	0.53953	14.017	0.27103	0.87587	1.22e-44	8.31e-44	0.97552	23.981	0.39615	0.92005	4.36e-127	6.15e-127
RGMB	5	0.2761	6.9837	0.78705	0.98425	2.87e-12	6.08e-12	1.5519	38.459	0.96493	0.99835	0	0
PTTG1IP	9	-0.12864	-4.0979	0.34302	0.91577	4.17e-05	6.2e-05	1.1104	33.613	0.51177	0.94837	1.09e-247	2.1e-247
UCP1	5	-0.024525	-0.57367	0.51076	0.95698	0.56619	0.59365	1.3816	31.214	0.8141	0.98659	6.86e-214	1.2e-213
DTWD2	5	-0.0799	-1.9904	0.41664	0.93607	0.046545	0.055578	1.8253	45.502	0.60368	0.96709	0	0
UGT2A3	4	0.11572	2.5077	0.81695	0.98557	0.012154	0.015228	-0.0859	-1.4022	0.042068	0.48846	0.16084	0.16374
PDE6G	5	0.50145	12.137	0.32607	0.90445	6.72e-34	3.28e-33	2.0172	47.987	0.38618	0.91447	0	0
UNKL	13	0.11067	4.3892	0.80515	0.98428	1.14e-05	1.74e-05	1.5746	61.298	0.9345	0.99718	0	0
CCDC36	5	-0.019999	-0.50563	0.51924	0.95738	0.61312	0.63987	2.5652	66.129	0.059293	0.55098	0	0
ABR	11	0.57727	20.726	0.2226	0.83154	2.01e-95	4.58e-94	1.7467	60.244	0.7046	0.981	0	0
CAMKMT	5	-0.051329	-1.3185	0.46352	0.95066	0.18733	0.2101	1.8246	46.858	0.60449	0.96715	0	0
MMP19	5	0.2284	5.552	0.90567	0.99436	2.82e-08	4.95e-08	1.3627	31.813	0.79107	0.98659	4.32e-222	7.74e-222
CHST8	5	0.57682	14.642	0.22318	0.83154	1.52e-48	1.16e-47	0.51468	11.23	0.15144	0.75515	2.89e-29	3.3e-29
ARNTL	5	0.24075	5.6338	0.87445	0.99253	1.76e-08	3.12e-08	0.73625	15.845	0.24256	0.84948	1.52e-56	1.84e-56
VAMP2	5	0.20497	5.0362	0.96377	0.99767	4.75e-07	7.84e-07	1.5745	37.589	0.93459	0.99718	0	0
SFTPA2	4	0.1185	2.7383	0.82347	0.98661	0.0061759	0.0079393	1.8093	41.521	0.62384	0.97217	0	0
SLC18A3	5	-0.017779	-0.45545	0.52321	0.95738	0.64878	0.67352	2.7128	70.938	0.031817	0.43738	0	0
UGT1A9	3	0.55011	8.3743	0.25647	0.86412	5.56e-17	1.44e-16	0.32109	3.715	0.09874	0.65971	0.00020318	0.00021243
PER1	5	0.27918	6.8255	0.7796	0.9835	8.76e-12	1.81e-11	2.3086	56.684	0.15824	0.7669	0	0
CTRC	5	0.5764	15.204	0.22372	0.83154	3.32e-52	2.78e-51	1.5889	41.025	0.91538	0.9954	0	0
FAM107B	9	0.33726	10.708	0.64338	0.97483	9.33e-27	3.54e-26	2.0179	63.458	0.38558	0.91417	0	0
IL24	5	0.41346	10.266	0.47917	0.95304	1e-24	3.51e-24	1.6327	39.592	0.85763	0.99087	0	0
ZCCHC7	5	0.34944	8.5797	0.61454	0.97329	9.51e-18	2.54e-17	0.37745	7.6221	0.11253	0.69058	2.5e-14	2.73e-14
BLOC1S4	5	0.22708	5.8018	0.90916	0.99436	6.56e-09	1.19e-08	0.7933	19.316	0.27327	0.8653	3.91e-83	5.01e-83
CCDC33	5	0.1114	2.8148	0.80696	0.98434	0.004881	0.0063239	0.89701	21.274	0.3375	0.89472	2e-100	2.65e-100
CHST7	5	0.18019	4.6558	0.97439	0.99833	3.23e-06	5.1e-06	1.052	25.885	0.45894	0.93789	9.83e-148	1.46e-147
ACOX1	5	-0.39082	-9.1367	0.11094	0.67997	6.44e-20	1.88e-19	0.86612	19.44	0.31775	0.88795	3.52e-84	4.52e-84
TSHZ2	5	0.040497	1.0333	0.64205	0.97483	0.30146	0.32947	1.9393	49.514	0.46809	0.93789	0	0
DCAF12L2	5	0.19897	5.1651	0.97804	0.99833	2.4e-07	4.02e-07	2.3603	61.702	0.13112	0.72622	0	0
IFT43	5	-0.019307	-0.49026	0.52031	0.95738	0.62395	0.65009	0.52277	11.973	0.15433	0.75956	4.89e-33	5.64e-33
TPST2	5	0.44268	10.748	0.42365	0.93857	6.02e-27	2.3e-26	1.4678	34.22	0.92376	0.99587	1.22e-256	2.41e-256
LZTS1	5	0.14218	3.6078	0.88048	0.99352	0.00030885	0.00043305	1.7949	45.118	0.642	0.97502	0	0
NNT	5	0.43639	10.894	0.43543	0.941	1.23e-27	4.82e-27	0.72713	16.21	0.23794	0.84645	4.27e-59	5.21e-59
TRIM25	5	0.30971	7.9857	0.70737	0.97763	1.4e-15	3.42e-15	1.955	50.001	0.45053	0.93702	0	0
CACNG1	5	-0.053647	-1.3577	0.45967	0.94974	0.17457	0.1966	2.6298	68.067	0.045122	0.50254	0	0
NIPSNAP3A	5	0.24642	5.9556	0.8604	0.99054	2.59e-09	4.78e-09	0.35664	7.1982	0.10738	0.67954	6.1e-13	6.65e-13
HOXA3	5	0.56762	14.637	0.23489	0.84498	1.63e-48	1.24e-47	2.3526	60.513	0.13473	0.73172	0	0
ANKRD23	5	0.087408	1.9889	0.74903	0.98105	0.046714	0.055769	1.2543	26.866	0.66112	0.97839	5.48e-159	8.31e-159
MCEE	5	0.044849	1.124	0.65152	0.97483	0.26102	0.28733	0.90437	21.102	0.34276	0.89693	7.56e-99	9.99e-99
ATG7	5	-0.81169	-19.044	0.016969	0.28507	7.3e-81	1.24e-79	0.64377	14.41	0.2002	0.81654	4.49e-47	5.32e-47
SMAD2	5	-0.21457	-3.9878	0.23997	0.84978	6.67e-05	9.8e-05	-0.21002	-2.8838	0.033317	0.44412	0.0039286	0.00407
INCENP	5	0.74623	16.281	0.086357	0.62298	1.34e-59	1.4e-58	0.92266	15.81	0.35579	0.90122	2.64e-56	3.2e-56
SPTBN1	5	0.15856	3.5362	0.92054	0.99473	0.00040597	0.00056482	1.8236	40.321	0.60581	0.96748	0	0
IPP	5	-0.19809	-4.5771	0.25758	0.86434	4.71e-06	7.38e-06	1.8382	42.909	0.58849	0.9654	0	0
ZNF70	5	0.47272	11.762	0.37228	0.92515	6.1e-32	2.8e-31	2.4074	60.007	0.11044	0.68657	0	0
DIS3L2	5	-0.34376	-7.6733	0.136	0.72741	1.68e-14	3.92e-14	1.7434	39.579	0.70916	0.98166	0	0
WNT2	5	0.33157	8.2191	0.65631	0.97483	2.05e-16	5.18e-16	1.9046	46.603	0.50823	0.94814	0	0
CHIC1	5	0.47995	11.609	0.36018	0.92053	3.71e-31	1.65e-30	1.5543	35.42	0.96167	0.99835	8.3e-275	1.74e-274
KIF7	5	0.14466	3.78	0.88678	0.99433	0.0001568	0.00022472	1.4511	37.159	0.90218	0.9945	3.18e-302	7.25e-302
NQO2	5	0.3514	9.0002	0.60992	0.97221	2.25e-19	6.42e-19	1.8382	46.436	0.58844	0.9654	0	0
POU2F3	5	-0.10799	-2.6005	0.37238	0.92515	0.0093079	0.011788	0.96826	22.134	0.39058	0.9167	1.49e-108	2.01e-108
ZMAT5	5	0.083539	1.976	0.73985	0.98055	0.048153	0.0574	1.7455	40.664	0.70619	0.9813	0	0
ZSCAN25	5	-0.31688	-7.3288	0.15316	0.75402	2.32e-13	5.15e-13	1.8382	42.98	0.58848	0.9654	0	0
ITSN1	5	-0.33149	-7.8429	0.14387	0.74348	4.4e-15	1.06e-14	2.5468	62.261	0.064123	0.56956	0	0
HMX3	5	-0.046463	-1.1931	0.47129	0.9511	0.23284	0.2582	1.6738	42.69	0.8027	0.98659	0	0
ZNF180	5	0.66981	14.858	0.13481	0.72515	6.18e-50	4.87e-49	3.1387	71.576	0.0048864	0.28205	0	0
CDAN1	5	0.33744	7.2624	0.64292	0.97483	3.8e-13	8.36e-13	1.6914	34.594	0.77879	0.98659	3.16e-262	6.37e-262
AHSG	5	0.38302	9.8404	0.54021	0.95988	7.54e-23	2.45e-22	0.63912	14.767	0.1982	0.816	2.39e-49	2.85e-49
ZBTB5	5	0.55164	14.096	0.25442	0.8623	4.04e-45	2.78e-44	0.064078	1.3493	0.056472	0.5424	0.17725	0.1803
ATXN7L2	5	0.40767	10.307	0.49048	0.95389	6.58e-25	2.32e-24	1.6984	41.772	0.76949	0.98659	0	0
MICB	5	0.22063	5.127	0.92549	0.99473	2.94e-07	4.91e-07	1.2579	27.738	0.6653	0.97951	2.43e-169	3.79e-169
PHOX2A	5	0.51543	12.731	0.30469	0.89601	3.99e-37	2.15e-36	1.0057	23	0.42041	0.92945	4.65e-117	6.41e-117
ANXA4	5	0.58843	14.793	0.21	0.82051	1.62e-49	1.26e-48	1.6035	38.919	0.89642	0.99388	0	0
PITPNB	5	0.065535	1.4143	0.69871	0.97759	0.15726	0.1779	1.8394	39.415	0.58686	0.9654	0	0
PMP2	5	0.2041	5.214	0.96601	0.99767	1.85e-07	3.11e-07	2.78	72.173	0.023544	0.39626	0	0
IL1RAP	5	0.38045	8.8273	0.54557	0.95988	1.07e-18	2.98e-18	0.73914	14.978	0.24428	0.85058	1.02e-50	1.22e-50
NKAIN4	5	0.29379	6.6176	0.74496	0.98069	3.65e-11	7.34e-11	1.2432	26.44	0.64893	0.97693	4.76e-154	7.13e-154
KDM4B	5	-0.19902	-4.9761	0.25661	0.86412	6.49e-07	1.06e-06	0.75934	18.136	0.25504	0.85874	1.66e-73	2.09e-73
ARFGAP2	5	0.27025	6.9175	0.80099	0.98428	4.6e-12	9.63e-12	1.2838	31.633	0.69439	0.98041	1.3e-219	2.31e-219
TMIE	5	0.45724	12.111	0.3977	0.93434	9.18e-34	4.47e-33	2.1169	55.834	0.29127	0.87568	0	0
TIMM17B	5	0.38533	9.9429	0.53538	0.95851	2.71e-23	8.95e-23	1.241	30.518	0.64635	0.97607	1.49e-204	2.55e-204
SPATC1	5	0.13452	3.3911	0.86229	0.99054	0.00069603	0.00095423	1.8687	46.845	0.55091	0.96153	0	0
CLEC2D	11	0.055493	1.8957	0.67565	0.97631	0.057996	0.06852	1.7583	59.416	0.6894	0.98041	0	0
AMOTL2	5	-0.070316	-1.8387	0.43202	0.94022	0.065952	0.077544	2.1252	56.012	0.28447	0.87159	0	0
MFSD12	5	0.34701	9.0713	0.62017	0.97427	1.18e-19	3.39e-19	2.2027	57.543	0.22523	0.83512	0	0
POGK	5	0.30163	7.5168	0.72623	0.97959	5.61e-14	1.28e-13	2.0084	49.761	0.39465	0.91907	0	0
EFCC1	5	0.16943	4.2665	0.94723	0.9955	1.99e-05	3.01e-05	0.89786	21.004	0.33804	0.8954	5.97e-98	7.89e-98
LDB3	5	0.081285	1.9081	0.7343	0.97993	0.056375	0.066719	1.0078	22.226	0.42194	0.92963	1.92e-109	2.6e-109
ISLR2	5	0.40307	10.145	0.49922	0.95481	3.47e-24	1.19e-23	1.7278	42.285	0.72882	0.9818	0	0
CD1E	23	0.1995	9.9709	0.97684	0.99833	2.04e-23	6.8e-23	1.4165	67.536	0.85742	0.99087	0	0
IGFBP5	5	0.28467	7.4151	0.76668	0.98318	1.21e-13	2.73e-13	2.3458	61.369	0.13825	0.73816	0	0
LIMA1	5	0.33613	8.2629	0.64589	0.97483	1.42e-16	3.62e-16	1.7228	41.37	0.73528	0.98268	0	0
METAP2	5	0.44469	10.529	0.41987	0.93721	6.36e-26	2.34e-25	1.2861	27.848	0.69704	0.98041	1.15e-170	1.79e-170
COL4A5	5	-0.041892	-0.924	0.47932	0.95304	0.35549	0.38445	1.5365	33.164	0.98555	0.99869	3.59e-241	6.81e-241
TF	5	0.15921	4.0244	0.92219	0.99473	5.71e-05	8.43e-05	1.6542	41.145	0.82885	0.98873	0	0
FGL1	5	0.37778	9.1001	0.55124	0.96172	9.02e-20	2.61e-19	1.3749	31.179	0.80597	0.98659	2.08e-213	3.65e-213
EAF1	5	0.91251	23.557	0.03144	0.39484	1.05e-122	3.72e-121	2.0974	53	0.30831	0.88534	0	0
IL36G	5	-0.16511	-3.5111	0.2959	0.88962	0.00044624	0.00061914	1.1367	22.898	0.53715	0.95724	4.83e-116	6.64e-116
VWA1	7	-0.1473	-4.3552	0.3178	0.89834	1.33e-05	2.03e-05	1.3821	40.098	0.81465	0.98659	0	0
DHX38	5	0.95623	20.474	0.023677	0.33868	3.69e-93	8.04e-92	1.1151	20.259	0.51624	0.94861	2.95e-91	3.84e-91
CEP41	9	-0.04918	-1.5053	0.46679	0.95066	0.13225	0.15079	2.1579	67.048	0.25785	0.85913	0	0
FBXL16	5	-0.38694	-8.6193	0.11287	0.68507	6.74e-18	1.81e-17	1.3499	29.767	0.77481	0.98659	1.05e-194	1.75e-194
SNX30	5	0.037324	0.92674	0.63556	0.97483	0.35406	0.38303	1.9799	49.26	0.42398	0.93034	0	0
UPF3A	5	-0.18089	-4.6058	0.27755	0.87892	4.11e-06	6.46e-06	1.3914	34.886	0.82599	0.98857	1.21e-266	2.47e-266
CHST9	8	0.38552	9.8394	0.53503	0.95851	7.62e-23	2.48e-22	2.0265	50.706	0.37708	0.91164	0	0
RFT1	5	0.54479	9.7274	0.26407	0.87016	2.3e-22	7.37e-22	-0.51768	-5.5328	0.020345	0.37657	3.15e-08	3.37e-08
KLRG2	5	0.056113	1.4545	0.67718	0.97654	0.14581	0.16549	0.47051	11.222	0.13782	0.73672	3.17e-29	3.62e-29
CREBL2	5	0.37989	9.1455	0.54674	0.95988	5.94e-20	1.74e-19	0.30386	5.8626	0.095175	0.64924	4.56e-09	4.89e-09
PLCG2	5	0.1624	4.2439	0.92987	0.99473	2.2e-05	3.32e-05	1.8642	48.463	0.55622	0.96183	0	0
CABP1	9	0.20545	6.9729	0.9626	0.99767	3.1e-12	6.54e-12	0.86093	27.433	0.31437	0.88667	1.11e-165	1.71e-165
CDK18	5	0.07764	1.9552	0.72578	0.97959	0.050557	0.060133	1.5654	38.974	0.94679	0.99718	0	0
ARSG	5	-0.042046	-1.0714	0.47908	0.95304	0.28401	0.31134	1.8079	46.005	0.6256	0.97217	0	0
BEND2	5	0.21454	5.3832	0.94034	0.99473	7.32e-08	1.26e-07	1.0109	23.896	0.4246	0.93034	3.4e-126	4.78e-126
SLC15A1	5	0.46635	11.811	0.38268	0.92608	3.42e-32	1.58e-31	1.8236	45.315	0.60581	0.96748	0	0
KPNA3	5	0.21254	4.9677	0.94538	0.99524	6.77e-07	1.11e-06	1.6343	37.672	0.85567	0.99087	1.4292e-310	3.362e-310
SPEG	6	0.47341	13.084	0.37114	0.92466	4.09e-39	2.35e-38	1.7331	46.999	0.72202	0.9818	0	0
ACP1	11	0.088905	2.8151	0.75297	0.98191	0.004876	0.0063184	1.3689	41.748	0.79809	0.98659	0	0
NBEA	10	0.33497	12.224	0.64849	0.97483	2.31e-34	1.15e-33	1.2102	42.283	0.61299	0.96957	0	0
DUOXA1	5	0.16643	3.9948	0.93991	0.99473	6.47e-05	9.51e-05	1.2748	29.148	0.68431	0.98041	8.97e-187	1.46e-186
CXCR4	5	0.17206	3.6774	0.95401	0.99566	0.00023562	0.00033364	1.4664	30.347	0.92214	0.99583	2.76e-202	4.69e-202
XAGE2	4	0.31307	6.8592	0.69899	0.97759	6.92e-12	1.44e-11	0.77088	15.397	0.26148	0.85952	1.72e-53	2.07e-53
DUSP1	5	-0.19833	-4.9228	0.25725	0.8642	8.53e-07	1.39e-06	0.85127	20.117	0.30805	0.88534	5.23e-90	6.79e-90
RNF123	5	0.62573	15.594	0.1722	0.77473	8.01e-55	7.23e-54	2.2834	56.407	0.17284	0.78606	0	0
TMEM52	5	0.0058802	0.13771	0.56932	0.96365	0.89047	0.90072	1.9106	44.774	0.50123	0.94645	0	0
TUBGCP3	5	-0.35441	-5.3602	0.13002	0.71583	8.31e-08	1.42e-07	0.63065	8.0032	0.19462	0.81341	1.21e-15	1.33e-15
FOSL2	5	-1.0957	-25.712	0.0058415	0.1621	8.54e-146	4.1e-144	-0.48013	-9.6432	0.021489	0.38507	5.25e-22	5.89e-22
ELMO2	5	0.2294	5.6497	0.90339	0.99436	1.61e-08	2.85e-08	1.4017	32.853	0.83944	0.98896	1.04e-236	1.94e-236
STAB1	5	0.54119	14.108	0.26878	0.87419	3.41e-45	2.35e-44	2.1852	56.641	0.23791	0.84645	0	0
KLHL1	5	0.32022	7.9704	0.68268	0.97759	1.58e-15	3.86e-15	1.8945	46.574	0.51923	0.94918	0	0
EFEMP1	5	0.48812	10.527	0.34704	0.91738	6.51e-26	2.39e-25	2.1436	45.69	0.26894	0.86196	0	0
KCNE1L	5	0.27471	6.416	0.79042	0.98425	1.4e-10	2.74e-10	1.5689	35.493	0.94222	0.99718	6.23e-276	1.31e-275
CYP21A2	5	0.27858	6.9511	0.78071	0.9835	3.63e-12	7.62e-12	1.1946	27.944	0.59609	0.9654	7.9e-172	1.24e-171
KCNMA1	5	0.46485	12.291	0.38505	0.92748	1.01e-34	5.09e-34	1.3151	33.702	0.73175	0.98209	5.45e-249	1.06e-248
HMHA1	5	-1.0442	-20.612	0.0068854	0.17367	2.14e-94	4.77e-93	0.36141	6.5914	0.10839	0.68081	4.36e-11	4.71e-11
LEPROT	5	0.40658	10.206	0.49224	0.95401	1.87e-24	6.45e-24	1.8177	44.693	0.61347	0.96957	0	0
KIAA1737	5	-0.3555	-7.7283	0.1294	0.71485	1.09e-14	2.57e-14	1.2563	26.571	0.66337	0.97905	1.47e-155	2.21e-155
PGBD4	5	0.27272	6.7078	0.79544	0.98428	1.98e-11	4.02e-11	0.81011	17.858	0.28274	0.86922	2.51e-71	3.14e-71
FSCN3	5	-0.034097	-0.89174	0.49359	0.95429	0.37253	0.40178	1.6422	42.662	0.84477	0.99008	0	0
RPE	9	1.2467	30.704	0.0044644	0.14255	5.02e-207	4.48e-205	1.6573	33.832	0.82483	0.9885	6.68e-251	1.3e-250
ARIH2OS	5	0.12793	3.2904	0.84671	0.98892	0.0010004	0.001358	1.4478	36.6	0.8979	0.99415	2.85e-293	6.31e-293
A1BG	5	0.23368	6.1054	0.89244	0.99436	1.03e-09	1.93e-09	1.8144	46.965	0.61744	0.9707	0	0
SFMBT1	5	0.043714	1.1111	0.64893	0.97483	0.26651	0.29301	2.2134	56.762	0.21764	0.83111	0	0
PPP1R3D	5	0.24209	6.1438	0.87106	0.99151	8.06e-10	1.52e-09	1.5957	39.693	0.90662	0.99482	0	0
RNF41	5	1.0185	25.129	0.016203	0.27897	2.4e-139	1.07e-137	2.0415	48.802	0.36164	0.90454	0	0
KLK7	5	0.20547	5.2593	0.96256	0.99767	1.45e-07	2.45e-07	1.9866	50.757	0.417	0.92865	0	0
TMEM185B	5	0.51652	13.57	0.30294	0.89501	6.05e-42	3.82e-41	2.1261	55.508	0.28364	0.87019	0	0
C10orf91	5	-0.60152	-13.534	0.042779	0.46466	9.85e-42	6.19e-41	1.9625	46.122	0.4427	0.93569	0	0
ITM2C	5	0.29117	7.5939	0.75105	0.98124	3.11e-14	7.18e-14	0.72581	17.796	0.23725	0.84592	7.57e-71	9.45e-71
NDST4	5	-0.14744	-3.3353	0.31764	0.89834	0.00085218	0.0011613	1.9943	45.565	0.40893	0.92576	0	0
KRTAP27-1	5	0.49727	12.177	0.33248	0.91011	4.11e-34	2.02e-33	1.9406	46.63	0.46654	0.93789	0	0
ZNF420	5	0.46452	10.464	0.3856	0.92775	1.26e-25	4.57e-25	0.69242	12.926	0.22113	0.83366	3.22e-38	3.75e-38
APH1A	5	0.074591	1.6739	0.71914	0.97959	0.094143	0.10893	2.0056	45.065	0.39763	0.92118	0	0
GATSL2	5	0.19987	5.1924	0.97588	0.99833	2.08e-07	3.49e-07	2.1386	55.649	0.27311	0.86521	0	0
DNAH1	5	0.45	11.625	0.41047	0.93549	3.06e-31	1.36e-30	1.4896	37.256	0.95227	0.99728	8.53e-304	1.96e-303
WAS	5	0.062264	1.5339	0.69119	0.97759	0.12507	0.14298	1.9091	46.964	0.50289	0.94703	0	0
TRMT61B	5	0.60441	15.719	0.19278	0.80706	1.13e-55	1.04e-54	1.5934	40.172	0.90941	0.99482	0	0
DAP	5	0.06609	1.4156	0.69993	0.97759	0.1569	0.1775	0.21923	3.8591	0.07875	0.61809	0.0001138	0.00011921
ZNF589	5	0.10142	2.6631	0.78273	0.98425	0.0077434	0.0098754	1.4844	38.319	0.94513	0.99718	0	0
FUT11	5	0.21214	5.068	0.94634	0.99524	4.02e-07	6.66e-07	1.8492	43.587	0.57427	0.9642	0	0
OLFML1	5	0.09003	1.9391	0.75556	0.98201	0.052486	0.062324	1.2481	25.346	0.65441	0.97732	1e-141	1.46e-141
KCNK18	5	0.30032	7.6836	0.72931	0.97966	1.55e-14	3.62e-14	1.3019	31.951	0.71559	0.9818	5.31e-224	9.57e-224
ARPP21	8	0.062365	1.9104	0.69141	0.97759	0.056077	0.066375	1.7081	51.797	0.75652	0.98553	0	0
ZNF35	5	-0.21209	-4.2322	0.24235	0.85321	2.31e-05	3.49e-05	1.2978	25.013	0.71077	0.98169	4.43e-138	6.4e-138
SLC30A3	5	0.19145	5.005	0.99695	0.99972	5.59e-07	9.19e-07	2.3543	61.952	0.13404	0.7313	0	0
ACAA2	5	0.26017	6.5015	0.82626	0.98661	7.95e-11	1.57e-10	1.0589	24.767	0.46551	0.93789	2.06e-135	2.96e-135
GZMM	5	0.22822	5.8787	0.9062	0.99436	4.14e-09	7.55e-09	2.1587	55.687	0.25716	0.85912	0	0
SLC26A4	5	0.45598	11.412	0.40014	0.93484	3.64e-30	1.56e-29	1.9894	49.031	0.41393	0.92704	0	0
DKK1	5	0.36676	9.6087	0.57517	0.96523	7.35e-22	2.3e-21	1.9212	49.954	0.48851	0.94215	0	0
DNAJB7	5	0.48881	12.165	0.34597	0.91683	4.77e-34	2.35e-33	1.6733	40.028	0.80343	0.98659	0	0
SNRNP40	5	0.55845	8.6065	0.24648	0.85712	7.54e-18	2.02e-17	1.8259	26.501	0.60299	0.96709	9.49e-155	1.42e-154
SLC50A1	10	0.16873	5.7968	0.94572	0.99524	6.76e-09	1.22e-08	1.4895	49.861	0.95215	0.99728	0	0
PLXNB3	5	0.041134	1.071	0.6434	0.97483	0.28417	0.3115	0.99625	24.947	0.4126	0.92704	2.32e-137	3.35e-137
GGH	5	0.10493	2.5634	0.7907	0.98425	0.010367	0.013072	1.3632	32.153	0.79169	0.98659	7.94e-227	1.45e-226
SPP2	5	-0.083684	-2.0191	0.41059	0.93549	0.043472	0.052023	0.98939	22.739	0.40722	0.92514	1.83e-114	2.51e-114
RDM1	5	-0.36818	-7.2811	0.12217	0.69952	3.31e-13	7.3e-13	0.61438	10.713	0.18809	0.80537	8.84e-27	1e-26
PDE1C	5	-0.036754	-0.86613	0.48866	0.95389	0.38642	0.41571	2.0858	49.892	0.3188	0.88819	0	0
RIN3	5	0.66649	17.207	0.13748	0.73121	2.36e-66	2.9e-65	2.383	61.292	0.12088	0.7077	0	0
C19orf35	5	0.50151	13.269	0.32595	0.90445	3.5e-40	2.08e-39	1.7605	45.865	0.68652	0.98041	0	0
TRIM36	9	0.3981	13.234	0.5089	0.95635	5.58e-40	3.3e-39	2.2695	75.411	0.18134	0.79518	0	0
CALML3	5	-0.040452	-1.0157	0.48183	0.95304	0.30975	0.33782	1.602	39.891	0.89887	0.99443	0	0
SOX18	5	0.48352	12.008	0.35448	0.91932	3.21e-33	1.54e-32	1.4036	33.767	0.84183	0.98952	6.05e-250	1.18e-249
DLG4	5	0.32407	8.261	0.67406	0.97606	1.44e-16	3.68e-16	2.2365	57.069	0.20229	0.81753	0	0
FADD	5	0.096707	2.4617	0.77154	0.9835	0.013829	0.017262	1.9246	48.881	0.48487	0.94096	0	0
ZER1	5	-0.081981	-2.1441	0.41317	0.93562	0.032024	0.038806	1.6906	44.086	0.77997	0.98659	0	0
LY96	6	-0.69093	-14.22	0.028775	0.37839	6.87e-46	4.83e-45	1.9446	42.89	0.4621	0.93789	0	0
ZNF688	5	0.013093	0.32953	0.58456	0.96662	0.74176	0.76189	1.9558	49.348	0.44974	0.93689	0	0
OLFML2B	5	0.010536	0.26471	0.57912	0.96636	0.79123	0.8081	1.8718	46.985	0.54726	0.95928	0	0
TNNC1	5	0.3242	6.8776	0.67381	0.97606	6.09e-12	1.27e-11	2.3875	51.026	0.1189	0.70365	0	0
SLC26A9	5	0.266	6.4714	0.81138	0.98511	9.71e-11	1.92e-10	0.24704	5.0102	0.083936	0.62786	5.44e-07	5.77e-07
GYPA	4	0.47749	10.388	0.3644	0.92155	2.8e-25	1e-24	1.6483	34.191	0.83662	0.98873	3.29e-256	6.5e-256
SLC8A1	5	0.086899	2.1541	0.74767	0.98105	0.031235	0.037893	1.4335	34.57	0.87928	0.99277	7.13e-262	1.43e-261
ANP32E	10	-0.3104	-8.5674	0.15708	0.75675	1.06e-17	2.82e-17	1.3795	37.161	0.81172	0.98659	2.92e-302	6.66e-302
TBC1D8B	5	0.74306	18.054	0.088012	0.62645	7.33e-73	1.05e-71	1.4713	32.801	0.92856	0.99718	5.74e-236	1.07e-235
OBSCN	5	0.52066	13.323	0.29714	0.8906	1.71e-40	1.03e-39	1.3895	34.182	0.82362	0.98817	4.49e-256	8.87e-256
PTGS2	5	-0.11474	-2.7855	0.36272	0.92155	0.0053446	0.0069012	0.81673	18.595	0.28662	0.87193	3.51e-77	4.45e-77
SNN	5	0.38694	10.073	0.53206	0.95851	7.24e-24	2.44e-23	2.4575	64.264	0.091676	0.63868	0	0
KANK2	5	-0.062088	-1.5865	0.44583	0.94333	0.11262	0.1293	1.2231	30.389	0.62649	0.97217	7.77e-203	1.32e-202
TRPC5	5	0.097692	2.3836	0.7739	0.9835	0.017143	0.021241	-0.041631	-0.79346	0.045699	0.50398	0.42751	0.43158
SMCO2	5	-0.017651	-0.42818	0.52348	0.95738	0.66852	0.69224	1.0824	24.646	0.48642	0.94107	4.04e-134	5.79e-134
B3GALT2	5	0.094609	2.1063	0.76664	0.98318	0.035177	0.04244	-0.039339	-0.68288	0.045888	0.50575	0.49468	0.49858
CCL25	5	0.35083	8.1308	0.61096	0.97262	4.27e-16	1.06e-15	2.2289	51.646	0.20725	0.82207	0	0
PIGR	5	0.14071	3.6069	0.87693	0.99286	0.00030983	0.00043439	1.387	34.517	0.82069	0.98817	4.53e-261	9.09e-261
KCNG4	5	-0.018555	-0.4593	0.52165	0.95738	0.64602	0.67082	1.5302	37.287	0.99373	0.99929	2.63e-304	6.05e-304
CD1A	5	-0.011457	-0.27607	0.53542	0.95851	0.7825	0.80027	0.60392	12.974	0.1839	0.7986	1.72e-38	2.01e-38
ADCY10	5	0.75117	19.071	0.084136	0.62092	4.42e-81	7.55e-80	1.2415	29.209	0.64691	0.97654	1.5e-187	2.45e-187
ST6GALNAC6	5	0.1571	3.8642	0.91704	0.99473	0.00011145	0.00016127	1.6992	41.179	0.76832	0.98659	0	0
LMO3	6	-0.013501	-0.32677	0.5314	0.95845	0.74384	0.76386	0.57553	11.743	0.17287	0.78606	7.64e-32	8.79e-32
XK	5	0.72692	18.854	0.096741	0.64859	2.74e-79	4.51e-78	1.6022	40.125	0.89862	0.99443	0	0
SCRT2	5	0.092926	2.4149	0.76271	0.98201	0.015741	0.019562	1.649	42.449	0.83578	0.98873	0	0
DENND1A	5	-0.51781	-11.989	0.062569	0.54658	4.04e-33	1.93e-32	2.1061	50.531	0.30078	0.88423	0	0
ZNF362	5	0.37739	8.2122	0.55201	0.96187	2.17e-16	5.48e-16	1.1573	23.401	0.55719	0.96183	4.13e-121	5.74e-121
ACTR1A	5	-1.8482	-37.035	0.0012105	0.092373	3.17e-300	6.21e-298	-2.6405	-22.918	0.001688	0.19363	3.11e-116	4.27e-116
TRIM42	5	0.44828	11.551	0.41339	0.93592	7.32e-31	3.21e-30	2.082	53.236	0.32255	0.89056	0	0
VSX2	5	-0.3182	-7.2765	0.15233	0.75401	3.43e-13	7.54e-13	1.4975	34.148	0.96332	0.99835	1.44e-255	2.84e-255
PKM	5	0.1985	3.5049	0.97902	0.99837	0.00045681	0.0006335	-0.53524	-5.457	0.019901	0.37608	4.84e-08	5.17e-08
CTAG2	6	0.37206	10.542	0.56321	0.96337	5.53e-26	2.04e-25	0.86944	22.819	0.3196	0.88847	2.98e-115	4.09e-115
OTP	5	0.40182	10.673	0.50178	0.95502	1.36e-26	5.14e-26	1.9921	52.584	0.41116	0.92704	0	0
CNTROB	5	0.017541	0.43057	0.59424	0.96927	0.66678	0.69063	1.9138	47.003	0.49727	0.94606	0	0
PAPPA	5	0.45908	10.406	0.39492	0.9328	2.32e-25	8.33e-25	1.5899	34.509	0.914	0.99519	5.98e-261	1.2e-260
GSG1L	6	-0.2922	-8.1748	0.17039	0.77473	2.96e-16	7.44e-16	1.4071	39.05	0.84623	0.99022	0	0
FOXF2	5	0.2234	5.8386	0.91851	0.99473	5.26e-09	9.55e-09	1.9038	49.573	0.50902	0.94814	0	0
C3orf72	5	-0.24248	-6.1672	0.21237	0.82249	6.95e-10	1.31e-09	1.6991	43.3	0.76853	0.98659	0	0
RING1	5	-0.85364	-22.089	0.014459	0.26383	4.06e-108	1.16e-106	1.0729	27.8	0.47766	0.94096	4.33e-170	6.76e-170
H2AFY2	5	0.04313	1.0753	0.64767	0.97483	0.28224	0.30947	1.3035	31.427	0.71773	0.9818	8.6e-217	1.52e-216
CPA1	5	0.34383	8.3967	0.62796	0.97483	4.59e-17	1.2e-16	2.1698	52.896	0.24915	0.85662	0	0
DOK5	5	0.16424	3.6066	0.93483	0.99473	0.00031018	0.00043485	1.4603	31.045	0.91453	0.99519	1.33e-211	2.32e-211
MAPK8IP1	5	-0.10504	-2.6567	0.37694	0.92552	0.0078901	0.010054	1.5368	38.409	0.98517	0.99865	0	0
BAALC	7	0.19705	6.0726	0.98289	0.99869	1.26e-09	2.35e-09	1.4911	44.992	0.95426	0.99781	0	0
KRT5	5	-0.0054256	-0.13516	0.54685	0.95988	0.89248	0.90246	1.7369	43.047	0.71722	0.9818	0	0
GIPR	5	-0.081122	-2.1241	0.41469	0.93607	0.033665	0.040708	1.3547	34.913	0.78074	0.98659	4.75e-267	9.71e-267
NUTM2G	2	-0.011304	-0.17125	0.53569	0.95851	0.86403	0.87649	1.8493	27.975	0.57415	0.9642	3.31e-172	5.19e-172
ZNRF1	5	0.18774	4.9517	0.99343	0.99878	7.36e-07	1.2e-06	1.9335	50.828	0.47507	0.9409	0	0
PTPRA	5	0.34307	8.8034	0.62977	0.97483	1.33e-18	3.68e-18	1.4649	36.464	0.92036	0.99583	4.18e-291	9.2e-291
NUCB1	5	0.26048	6.3116	0.82545	0.98661	2.76e-10	5.32e-10	1.582	37.48	0.92478	0.99631	1.95e-307	4.53e-307
NR2C1	5	-0.16724	-3.8843	0.29308	0.88817	0.00010261	0.00014879	1.6656	38.582	0.8133	0.98659	0	0
ZNF414	5	0.28683	7.4335	0.7615	0.98201	1.06e-13	2.39e-13	1.8702	48.018	0.5491	0.96045	0	0
CDK16	5	0.27218	6.7781	0.79682	0.98428	1.22e-11	2.5e-11	2.3251	58.249	0.14908	0.75331	0	0
FGF13	5	0.33354	8.0503	0.65197	0.97483	8.26e-16	2.04e-15	1.853	43.956	0.56987	0.9642	0	0
ANK1	13	0.26779	11.082	0.80703	0.98434	1.54e-28	6.22e-28	1.2867	51.036	0.69771	0.98041	0	0
CEL	5	-0.28699	-7.135	0.17446	0.77902	9.68e-13	2.09e-12	1.1109	27.06	0.51237	0.94837	2.89e-161	4.4e-161
SHBG	5	0.6449	16.622	0.15478	0.75478	4.85e-62	5.39e-61	1.9771	49.998	0.42699	0.93034	0	0
ADAM15	5	0.083562	2.1029	0.73992	0.98055	0.035478	0.042791	1.7913	44.706	0.64641	0.97607	0	0
PAX6	5	0.11503	2.9622	0.81547	0.98549	0.003054	0.0040161	1.4754	37.163	0.93369	0.99718	2.7e-302	6.16e-302
APOL1	5	-0.11895	-2.8599	0.35695	0.91979	0.0042372	0.0055111	2.6618	65.986	0.039325	0.47498	0	0
PRR18	5	0.19108	4.9563	0.99792	0.99976	7.19e-07	1.17e-06	1.0783	26.974	0.48261	0.94096	3.02e-160	4.6e-160
ZNF454	5	0.38209	9.4026	0.542	0.95988	5.32e-21	1.62e-20	1.3415	30.975	0.76412	0.98627	1.15e-210	2.01e-210
ZP1	5	-0.017952	-0.41544	0.52287	0.95738	0.67782	0.70126	2.3185	54.343	0.15275	0.75838	0	0
BTNL9	5	0.40769	10.297	0.49044	0.95389	7.24e-25	2.54e-24	2.0986	52.707	0.30732	0.88534	0	0
BBX	5	-0.006832	-0.16804	0.54406	0.95988	0.86655	0.8788	1.0981	26.123	0.50058	0.94645	1.99e-150	2.97e-150
CERS6	5	-0.93737	-17.635	0.010395	0.21717	1.34e-69	1.76e-68	1.1725	22.531	0.57291	0.9642	2.05e-112	2.79e-112
PCDHAC1	5	0.29753	7.6848	0.73617	0.97995	1.53e-14	3.59e-14	1.3557	34.268	0.78195	0.98659	2.34e-257	4.64e-257
METTL23	8	-0.014376	-0.3597	0.5298	0.95827	0.71907	0.74037	1.9907	50.364	0.41282	0.92704	0	0
KCNB1	5	0.34402	8.6314	0.6276	0.97483	6.06e-18	1.63e-17	1.1365	26.72	0.53702	0.95724	2.78e-157	4.19e-157
GPR137B	5	0.37739	9.9161	0.55201	0.96187	3.54e-23	1.17e-22	1.362	34.741	0.79017	0.98659	1.88e-264	3.82e-264
C10orf95	5	-0.26023	-6.4803	0.19756	0.81177	9.15e-11	1.81e-10	2.5002	64.416	0.077617	0.61576	0	0
CTNNA3	5	0.29847	7.4094	0.73386	0.97993	1.27e-13	2.85e-13	1.3527	31.788	0.77817	0.98659	9.62e-222	1.72e-221
LRRTM1	5	0.24986	6.3284	0.85209	0.98966	2.48e-10	4.79e-10	2.3924	61.165	0.11675	0.69758	0	0
ZNF263	5	0.064281	1.6385	0.69541	0.97759	0.10133	0.11688	1.7221	43.476	0.73624	0.98294	0	0
STK40	5	0.26474	6.7347	0.8144	0.98511	1.64e-11	3.36e-11	3.1482	81.596	0.0047532	0.28066	0	0
ICT1	5	0.78701	17.018	0.067833	0.56634	6.06e-65	7.18e-64	1.8748	38.097	0.54354	0.95863	0	0
JPH4	5	0.21868	5.4969	0.93058	0.99473	3.87e-08	6.73e-08	1.7245	42.675	0.73311	0.98215	0	0
UFM1	7	0.6581	15.14	0.14418	0.7438	8.83e-52	7.27e-51	1.5238	32.599	0.99792	0.99946	4.24e-233	7.87e-233
KIAA1328	5	0.25578	6.1211	0.83704	0.98816	9.29e-10	1.75e-09	2.0757	49.503	0.32854	0.89187	0	0
IL13RA1	5	0.15747	3.5206	0.91801	0.99473	0.0004305	0.00059794	1.4761	31.547	0.93465	0.99718	1.96e-218	3.47e-218
CPNE1	5	0.66426	17.283	0.13917	0.73458	6.36e-67	7.91e-66	1.2915	32.059	0.703	0.98041	1.64e-225	2.97e-225
CCDC17	5	-0.13774	-3.5405	0.33052	0.90765	0.00039944	0.00055609	1.4061	35.637	0.84484	0.99008	3.7e-278	7.82e-278
SSR4	5	0.08761	2.1261	0.74951	0.98105	0.033491	0.040509	0.67727	15.121	0.21405	0.8265	1.18e-51	1.41e-51
CLCNKB	7	0.3401	9.1756	0.63673	0.97483	4.49e-20	1.32e-19	1.3604	35.097	0.78794	0.98659	7.39e-270	1.52e-269
C16orf89	5	0.47716	11.997	0.36508	0.9224	3.66e-33	1.75e-32	1.0588	24.37	0.46537	0.93789	3.57e-131	5.08e-131
FAM20C	5	0.10052	2.5335	0.78071	0.9835	0.011292	0.014189	1.5468	38.135	0.97191	0.99835	0	0
ENOX2	5	0.50057	12.919	0.32739	0.90526	3.52e-38	1.97e-37	1.7541	44.355	0.69505	0.98041	0	0
PAQR6	5	0.04012	0.96596	0.6412	0.97483	0.33407	0.36233	1.5963	37.648	0.90588	0.99482	3.4856e-310	8.1841e-310
BCL2L11	17	0.071322	3.1364	0.71172	0.97771	0.0017101	0.0022863	1.9387	85.197	0.46869	0.93789	0	0
SRSF9	5	-0.30735	-7.6914	0.15906	0.75885	1.46e-14	3.41e-14	2.006	51.224	0.39713	0.92058	0	0
ATRN	5	0.1268	3.273	0.84414	0.98892	0.001064	0.0014416	1.136	28.173	0.53644	0.95724	1.25e-174	1.98e-174
PDE10A	5	-0.024826	-0.59653	0.51018	0.95666	0.55082	0.57854	1.4839	35.071	0.94469	0.99718	1.86e-269	3.82e-269
ADAMTS12	5	0.034135	0.88573	0.62874	0.97483	0.37576	0.40492	1.5044	38.426	0.97209	0.99835	0	0
PNLIP	5	0.6181	13.886	0.1794	0.78704	7.73e-44	5.14e-43	1.2741	26.893	0.68352	0.98041	2.62e-159	3.98e-159
EGFR	5	-0.0049851	-0.1218	0.54776	0.96025	0.90305	0.91202	1.2422	29.17	0.64755	0.97654	4.62e-187	7.56e-187
ZCCHC17	5	0.56451	14.358	0.2387	0.84789	9.56e-47	6.89e-46	1.7104	42.174	0.75329	0.98503	0	0
DDR1	5	0.16538	3.8995	0.93766	0.99473	9.64e-05	0.00014003	0.96293	21.728	0.38606	0.91447	1.11e-104	1.49e-104
AKAP8	5	0.024226	0.60996	0.60794	0.97198	0.54189	0.56999	1.474	36.506	0.93187	0.99718	8.81e-292	1.94e-291
RGL2	5	0.34367	8.8903	0.62833	0.97483	6.09e-19	1.71e-18	0.42576	9.7349	0.12512	0.71644	2.14e-22	2.4e-22
KLF8	5	0.302	7.6964	0.72548	0.97959	1.4e-14	3.28e-14	1.1577	27.967	0.55758	0.96183	4.1e-172	6.43e-172
FBXO8	5	0.60794	13.722	0.18888	0.79981	7.48e-43	4.83e-42	0.84474	15.898	0.30408	0.8847	6.58e-57	7.98e-57
GBA	9	0.35047	11.091	0.61183	0.97292	1.38e-28	5.58e-28	2.1089	66.386	0.29822	0.88168	0	0
YWHAH	5	0.12011	3.0107	0.82734	0.98661	0.0026067	0.0034422	1.1333	27.202	0.53366	0.95542	6.22e-163	9.53e-163
ADAMTS7	5	0.29536	7.2892	0.74142	0.98055	3.12e-13	6.88e-13	1.7779	43.211	0.66368	0.97921	0	0
SP8	5	0.2933	7.7175	0.74617	0.98069	1.19e-14	2.79e-14	2.089	54.857	0.31599	0.88772	0	0
G3BP1	5	-3.5698	-61.908	0.00023322	0.081675	0	0	-2.5224	-37.821	0.001999	0.1989	0	0
FDPS	5	-1.3942	-23.677	0.0025321	0.11286	6.26e-124	2.3e-122	0.87684	15.782	0.3244	0.89056	4.16e-56	5.04e-56
TIMP4	5	-0.10919	-2.7815	0.37091	0.92466	0.0054104	0.0069817	2.132	55.014	0.27871	0.86837	0	0
TTPA	5	-0.084656	-1.5663	0.409	0.93515	0.11727	0.13443	1.3096	23.411	0.72496	0.9818	3.33e-121	4.63e-121
PRDM8	5	-0.1231	-3.0719	0.3512	0.91931	0.0021273	0.0028265	1.7646	44.045	0.68114	0.98041	0	0
MED19	5	1.4659	27.511	0.0014993	0.093426	1.3e-166	7.69e-165	3.0865	57.116	0.0062191	0.30187	0	0
PBX4	5	0.3675	9.3392	0.57349	0.96456	9.71e-21	2.92e-20	1.3219	31.891	0.74024	0.9839	3.6e-223	6.48e-223
SEC22A	5	0.076057	1.5375	0.72253	0.97959	0.12418	0.14199	2.3087	48.071	0.15821	0.7669	0	0
TK1	5	1.2415	29.078	0.0045533	0.14386	6.72e-186	4.86e-184	1.5972	33.902	0.90494	0.99482	6.26e-252	1.22e-251
PARP12	5	-0.12439	-3.0864	0.34937	0.91931	0.0020261	0.0026956	1.292	31.158	0.70357	0.98059	3.94e-213	6.88e-213
MAP3K6	5	-0.25092	-5.7363	0.20539	0.81677	9.68e-09	1.73e-08	1.744	40.063	0.7083	0.98166	0	0
FABP2	5	0.7155	14.041	0.10375	0.66857	8.7e-45	5.92e-44	2.5688	50.317	0.058337	0.54825	0	0
ABCG4	5	-0.13002	-3.2118	0.34114	0.91577	0.0013193	0.0017774	0.27851	5.9444	0.089766	0.63571	2.77e-09	2.98e-09
MPC1	5	-1.5331	-29.467	0.0018657	0.099408	7.72e-191	5.79e-189	0.34967	6.722	0.10559	0.67457	1.79e-11	1.94e-11
FGFR2	5	0.44732	9.108	0.41499	0.93607	8.39e-20	2.43e-19	2.4877	51.296	0.081415	0.62259	0	0
TTC36	5	-0.19858	-5.0168	0.25696	0.8642	5.25e-07	8.65e-07	1.322	32.769	0.7404	0.9839	1.6e-235	2.99e-235
PLAC1	5	0.51071	11.465	0.31162	0.89601	1.99e-30	8.59e-30	1.5717	33.52	0.93846	0.99718	2.48e-246	4.78e-246
ZNF24	5	-0.23063	-5.0695	0.22382	0.83154	3.99e-07	6.61e-07	2.1292	48.12	0.28073	0.86837	0	0
F2	5	0.12653	3.2629	0.8433	0.98892	0.0011029	0.0014928	1.5679	39.872	0.94339	0.99718	0	0
PLD4	5	0.54792	13.619	0.25987	0.86679	3.08e-42	1.96e-41	1.9589	47.995	0.44663	0.93683	0	0
LAMC1	5	0.28748	7.3597	0.7599	0.98201	1.84e-13	4.11e-13	1.9785	50.307	0.42544	0.93034	0	0
DPPA5	5	0.86499	21.778	0.041979	0.46324	3.74e-105	1.01e-103	1.1763	26.807	0.57693	0.96511	2.65e-158	4e-158
FBXO16	5	0.38365	9.55	0.53879	0.95936	1.3e-21	4.04e-21	1.7144	41.798	0.74738	0.98497	0	0
GFRAL	5	0.11438	2.7404	0.81402	0.98511	0.0061371	0.0078917	1.3493	30.917	0.77412	0.98659	7.11e-210	1.23e-209
GPR128	5	0.16034	3.9781	0.92493	0.99473	6.95e-05	0.0001019	1.2461	29.371	0.65194	0.97693	1.3e-189	2.14e-189
PNMA1	5	0.55896	13.671	0.24573	0.85679	1.52e-42	9.73e-42	1.0588	23.42	0.46531	0.93789	2.7e-121	3.75e-121
BSPH1	5	1.0147	21.308	0.016525	0.28049	9.57e-101	2.38e-99	1.443	27.352	0.8917	0.99306	1.03e-164	1.58e-164
USP50	5	0.25309	6.3693	0.84409	0.98892	1.9e-10	3.69e-10	1.6766	41.18	0.79899	0.98659	0	0
ALG6	5	-0.27945	-5.5981	0.18105	0.79022	2.17e-08	3.82e-08	1.5915	31.852	0.91212	0.99519	1.22e-222	2.18e-222
CPA4	5	0.06208	1.555	0.69081	0.97759	0.11994	0.13732	1.7551	43.621	0.69388	0.98041	0	0
MRC2	5	0.009758	0.24156	0.57754	0.9661	0.80912	0.82478	0.96333	22.447	0.38638	0.91447	1.37e-111	1.86e-111
LSMEM1	5	0.23206	5.1117	0.8965	0.99436	3.19e-07	5.31e-07	1.6357	34.716	0.85366	0.99087	4.57e-264	9.26e-264
KRTAP21-1	3	0.47756	8.3479	0.3643	0.92155	6.95e-17	1.8e-16	-0.16344	-2.0863	0.036315	0.4605	0.036955	0.037943
ESR1	5	0.31197	8.1517	0.70179	0.97763	3.59e-16	8.97e-16	1.3527	34.311	0.77817	0.98659	5.38e-258	1.07e-257
ELOVL3	5	0.55313	13.318	0.25263	0.8623	1.82e-40	1.1e-39	0.68431	14.988	0.21719	0.83103	8.77e-51	1.05e-50
COL1A2	5	0.27177	6.4837	0.79768	0.98428	8.95e-11	1.77e-10	1.9699	46.489	0.43446	0.93347	0	0
C7orf55	5	-0.1665	-4.0595	0.29391	0.88822	4.92e-05	7.28e-05	2.2369	55.699	0.20189	0.81753	0	0
DHX36	5	-3.0485	-31.992	0.00033317	0.081675	1.41e-224	1.41e-222	-0.60119	-7.6554	0.01818	0.36318	1.93e-14	2.11e-14
SLC39A1	5	0.14058	3.4223	0.87673	0.99286	0.00062086	0.00085369	1.4566	34.577	0.90943	0.99482	5.59e-262	1.13e-261
GOLPH3L	5	-0.03681	-0.79659	0.48861	0.95389	0.42569	0.45538	1.9478	42.391	0.45878	0.93789	0	0
C2orf91	5	0.21211	5.3918	0.9464	0.99524	6.98e-08	1.2e-07	1.9472	49.202	0.4594	0.93789	0	0
GPAM	5	0.1509	3.8387	0.90219	0.99436	0.00012367	0.00017836	1.7936	45.18	0.64374	0.97528	0	0
MPP4	5	0.029755	0.73739	0.61946	0.97406	0.46089	0.49049	1.9758	49.098	0.42819	0.93122	0	0
CTTNBP2	5	0.1294	3.2576	0.84996	0.9894	0.0011235	0.0015194	1.2185	29.305	0.62154	0.97217	9.03e-189	1.48e-188
POPDC3	5	-0.12297	-2.9633	0.35136	0.91931	0.0030432	0.004003	1.6339	39.107	0.85618	0.99087	0	0
CENPB	5	0.26317	6.5513	0.81838	0.98583	5.7e-11	1.14e-10	2.0862	51.833	0.31847	0.88804	0	0
MEF2B	5	0.14608	3.7083	0.89013	0.99433	0.00020864	0.00029644	1.7513	43.97	0.69881	0.98041	0	0
EPHA1	5	0.50102	13.138	0.3267	0.90512	1.99e-39	1.16e-38	2.4251	63.649	0.10334	0.66812	0	0
CNKSR1	5	0.32368	7.9482	0.67493	0.97613	1.89e-15	4.6e-15	1.2862	29.711	0.69723	0.98041	5.52e-194	9.18e-194
C1orf204	5	0.23208	5.9814	0.89645	0.99436	2.21e-09	4.09e-09	1.5294	38.501	0.99481	0.99929	0	0
TSPAN2	5	0.010413	0.22982	0.5789	0.96636	0.81823	0.83346	1.3616	28.987	0.78965	0.98659	9.51e-185	1.54e-184
DUSP13	13	0.40668	16.083	0.49203	0.95401	3.38e-58	3.38e-57	1.2543	47.01	0.66111	0.97839	0	0
MSN	5	0.69551	17.135	0.11661	0.6935	8.2e-66	9.97e-65	1.9985	47.83	0.40486	0.92364	0	0
NPTX1	5	0.086418	2.1139	0.74673	0.98069	0.034521	0.041697	1.9586	47.89	0.44688	0.93683	0	0
AMMECR1	5	-0.46392	-11.908	0.080027	0.60834	1.08e-32	5.09e-32	1.1545	29.267	0.5542	0.96162	2.73e-188	4.48e-188
CREB3	5	0.70527	18.142	0.1099	0.67906	1.49e-73	2.15e-72	1.7008	42.253	0.76602	0.98659	0	0
ZFP36	5	0.51077	13.224	0.31146	0.89601	6.34e-40	3.75e-39	2.7753	72.476	0.024021	0.4	0	0
RGAG4	5	0.038437	0.9939	0.6378	0.97483	0.32027	0.34852	2.1946	57.054	0.23101	0.83913	0	0
C20orf96	5	0.41166	10.468	0.48265	0.95304	1.22e-25	4.42e-25	2.0958	52.894	0.30973	0.88537	0	0
C2orf54	5	0.27169	6.9553	0.79778	0.98428	3.52e-12	7.4e-12	1.5335	38.529	0.98984	0.99928	0	0
RCOR3	5	0.95319	23.935	0.024099	0.34013	1.31e-126	4.95e-125	0.68738	15.431	0.21855	0.83121	1.02e-53	1.22e-53
TRPM5	5	-0.22731	-5.7323	0.22708	0.83423	9.91e-09	1.77e-08	1.467	36.639	0.92276	0.99583	6.95e-294	1.54e-293
GFRA4	5	0.52687	13.615	0.28809	0.88646	3.26e-42	2.07e-41	2.2601	58.151	0.18708	0.80334	0	0
AP4M1	5	0.15483	3.7005	0.91168	0.99436	0.00021515	0.00030531	0.36048	7.406	0.10826	0.68063	1.3e-13	1.42e-13
FAM222B	5	0.40837	10.419	0.48924	0.95389	2.03e-25	7.31e-25	1.0947	26.261	0.49744	0.94628	5.32e-152	7.94e-152
MBLAC2	5	0.48198	12.584	0.35689	0.91979	2.59e-36	1.36e-35	0.93701	23.351	0.36638	0.9089	1.33e-120	1.85e-120
TIE1	5	0.37173	9.5165	0.56387	0.96337	1.79e-21	5.54e-21	2.0309	51.574	0.37228	0.91109	0	0
NPFFR1	5	0.41096	10.181	0.48416	0.95304	2.42e-24	8.34e-24	0.62843	14.101	0.1937	0.81163	3.73e-45	4.41e-45
PLA2G15	5	-0.14938	-3.6513	0.3153	0.89752	0.00026087	0.00036799	1.7247	42.142	0.73283	0.98211	0	0
GMFB	5	0.30089	6.6712	0.72795	0.97959	2.54e-11	5.14e-11	1.1794	24.426	0.58023	0.9654	9.16e-132	1.31e-131
ZNF148	5	0.6701	12.193	0.1346	0.72445	3.4e-34	1.68e-33	-0.76064	-8.5026	0.014537	0.33814	1.85e-17	2.05e-17
TGFB3	5	0.35665	8.9736	0.59778	0.97008	2.87e-19	8.14e-19	1.5837	38.618	0.92251	0.99583	0	0
IDH3G	5	0.092489	2.3083	0.76176	0.98201	0.020985	0.025818	1.147	27.141	0.54697	0.95928	3.27e-162	5e-162
EPDR1	12	-0.063671	-2.2314	0.44325	0.94243	0.025656	0.031335	1.1314	37.875	0.53175	0.95483	0	0
AKAP10	5	0.021402	0.52451	0.6021	0.97085	0.59992	0.62694	1.2152	28.315	0.61828	0.97137	2.27e-176	3.61e-176
C2orf82	5	0.33014	8.612	0.65954	0.97525	7.18e-18	1.93e-17	0.63429	15.454	0.19617	0.81365	7.14e-54	8.61e-54
ZNF641	5	0.6113	14.298	0.18572	0.79624	2.24e-46	1.6e-45	0.3429	6.8405	0.1037	0.66924	7.89e-12	8.56e-12
NDUFB7	5	-0.38774	-6.7724	0.11247	0.68356	1.27e-11	2.6e-11	1.3133	22.312	0.72939	0.9818	2.86e-110	3.87e-110
CCDC101	5	-0.58626	-10.406	0.045888	0.48074	2.32e-25	8.34e-25	2.7283	56.609	0.029718	0.42641	0	0
DNAJC25	5	0.1092	2.6778	0.80163	0.98428	0.0074104	0.0094634	1.6637	40.18	0.81555	0.98659	0	0
RGPD1	1	0.40048	4.7152	0.50427	0.95548	2.41e-06	3.84e-06	0.32587	3.3943	0.099728	0.65981	0.00068804	0.00071665
FABP12	5	0.54149	12.776	0.26834	0.8741	2.24e-37	1.21e-36	0.96376	21.141	0.38671	0.91464	3.36e-99	4.45e-99
HLA-DOB	5	0.44788	11.678	0.41406	0.93592	1.66e-31	7.46e-31	1.4759	37.433	0.93447	0.99718	1.13e-306	2.62e-306
PHKA1	5	0.017556	0.4538	0.59424	0.96927	0.64997	0.67454	1.3183	33.343	0.73565	0.98282	9.31e-244	1.78e-243
CRABP2	5	0.15004	3.7548	0.90012	0.99436	0.00017346	0.00024783	1.4519	35.474	0.9031	0.99472	1.25e-275	2.62e-275
LUC7L	5	0.0088634	0.2277	0.57562	0.96537	0.81988	0.8349	1.8231	46.723	0.6066	0.96788	0	0
ABHD4	5	0.25041	6.2626	0.85081	0.98947	3.79e-10	7.25e-10	2.1998	55.165	0.22708	0.83666	0	0
CTSZ	5	0.052474	1.3156	0.66851	0.97606	0.18832	0.21109	1.2497	30.244	0.65617	0.97766	6.29e-201	1.06e-200
MT4	3	0.17668	3.1346	0.96594	0.99767	0.0017207	0.0023002	1.2263	20.779	0.63016	0.97217	6.75e-96	8.86e-96
C22orf29	5	0.43021	10.999	0.44643	0.94364	3.86e-28	1.54e-27	1.4276	35.104	0.87172	0.992	5.81e-270	1.2e-269
TLX3	5	0.48678	12.118	0.34909	0.91931	8.52e-34	4.15e-33	2.2097	54.737	0.2201	0.83203	0	0
SCAI	5	-0.63924	-13.354	0.035904	0.4251	1.12e-40	6.77e-40	0.24997	4.537	0.084502	0.62935	5.71e-06	6.03e-06
GPR116	5	-0.9056	-17.622	0.011883	0.23646	1.68e-69	2.21e-68	0.87444	16.835	0.32285	0.89056	1.36e-63	1.67e-63
NPPC	5	0.16435	4.058	0.9351	0.99473	4.95e-05	7.32e-05	0.76791	17.306	0.25998	0.85952	4.2e-67	5.22e-67
ASMTL	5	0.16391	4.1801	0.93397	0.99473	2.91e-05	4.37e-05	2.0666	52.724	0.33706	0.89445	0	0
CDC34	5	0.018171	0.44949	0.59548	0.96927	0.65308	0.67745	2.625	66.697	0.046033	0.50641	0	0
CNNM2	5	0.38032	9.3132	0.54582	0.95988	1.24e-20	3.71e-20	1.5221	35.994	0.99552	0.99929	1.03e-283	2.22e-283
NUDCD1	5	0.6036	12.288	0.19367	0.80834	1.05e-34	5.29e-34	0.96991	16.343	0.39203	0.91765	4.91e-60	6e-60
LIMK2	5	0.45437	11.889	0.40304	0.93494	1.35e-32	6.34e-32	1.5324	38.962	0.99114	0.99928	0	0
C11orf80	5	0.66156	15.328	0.14143	0.73886	5e-53	4.29e-52	2.4185	55.81	0.10578	0.67465	0	0
NTN3	5	-0.29109	-7.4474	0.17143	0.77473	9.52e-14	2.15e-13	2.0485	53.218	0.35486	0.90122	0	0
BOLA1	5	0.2827	7.2517	0.77139	0.9835	4.12e-13	9.02e-13	1.9061	48.449	0.50639	0.94737	0	0
TTLL5	5	-0.12773	-3.0618	0.34435	0.91577	0.0022001	0.0029218	1.3135	30.438	0.72961	0.9818	1.74e-203	2.96e-203
LYAR	5	-0.044736	-1.1269	0.47432	0.95186	0.25977	0.28602	0.8638	20.555	0.31622	0.88775	6.95e-94	9.1e-94
KIAA2022	5	0.68904	17.689	0.12113	0.69907	5.11e-70	6.81e-69	1.8909	47.492	0.5234	0.95183	0	0
TGM5	5	0.14491	3.7477	0.88746	0.99433	0.00017844	0.00025456	1.6965	43.307	0.77232	0.98659	0	0
RPS6KB2	5	0.11926	3.0541	0.82513	0.98661	0.0022577	0.0029953	1.3235	32.85	0.74217	0.9839	1.15e-236	2.15e-236
ANKMY1	5	-0.12076	-2.8228	0.35431	0.91932	0.0047601	0.0061717	1.5504	35.876	0.96698	0.99835	7.33e-282	1.57e-281
GUSB	5	-0.19004	-4.7819	0.26697	0.87256	1.74e-06	2.78e-06	2.11	53.928	0.29711	0.87995	0	0
GCNT2	15	0.28633	11.095	0.76271	0.98201	1.32e-28	5.34e-28	1.1086	39.136	0.51002	0.94814	0	0
FASN	5	0.81675	21.089	0.056761	0.52177	1.01e-98	2.43e-97	2.1398	54.329	0.27231	0.86445	0	0
ATP6V1C2	5	0.43505	9.4601	0.43788	0.94151	3.08e-21	9.42e-21	-0.2191	-3.3267	0.032795	0.44307	0.00087891	0.00091477
RBBP9	5	0.43666	9.7191	0.43488	0.941	2.5e-22	7.98e-22	2.277	50.602	0.17661	0.78943	0	0
FAM9C	5	0.26655	6.0457	0.80995	0.98511	1.49e-09	2.77e-09	1.4195	30.665	0.86129	0.99172	1.67e-206	2.86e-206
SH3PXD2B	5	-0.085537	-2.2382	0.40731	0.9351	0.025205	0.030818	1.7628	46.078	0.68356	0.98041	0	0
GORAB	5	0.37952	8.8548	0.54763	0.9602	8.38e-19	2.34e-18	1.8856	42.96	0.53031	0.95483	0	0
LEMD1	10	0.044496	1.3555	0.65077	0.97483	0.17526	0.19732	1.9263	58.68	0.48303	0.94096	0	0
COL7A1	5	0.077333	1.9998	0.72514	0.97959	0.045527	0.054409	2.4292	63.549	0.10184	0.66383	0	0
NANOS2	5	0.26277	6.6364	0.81948	0.98626	3.22e-11	6.48e-11	0.92207	21.77	0.35534	0.90122	4.49e-105	6.02e-105
BRE	5	-1.4762	-32.3	0.0021323	0.10663	6.92e-229	7.29e-227	0.93808	21.638	0.36712	0.9089	7.91e-104	1.06e-103
SNCA	6	0.10917	2.8448	0.8016	0.98428	0.0044439	0.0057713	0.94425	22.538	0.37183	0.91109	1.77e-112	2.42e-112
C15orf40	5	-0.24651	-5.9945	0.20914	0.8195	2.04e-09	3.78e-09	0.88859	20.458	0.33203	0.89368	5.14e-93	6.73e-93
TMCC2	5	0.32293	8.2613	0.67677	0.97654	1.44e-16	3.67e-16	1.2366	30.176	0.6415	0.97476	4.96e-200	8.37e-200
PSEN2	5	0.63114	15.127	0.16719	0.77163	1.08e-51	8.85e-51	1.6319	37.701	0.85868	0.99099	0	0
GFOD1	11	0.31176	11.452	0.70229	0.97763	2.3e-30	9.91e-30	1.4244	50.819	0.86736	0.99172	0	0
GLB1L	5	-0.11387	-2.7803	0.36382	0.92155	0.0054301	0.0070061	0.93748	21.359	0.36674	0.9089	3.23e-101	4.29e-101
SSX2IP	5	0.032143	0.70429	0.6242	0.97483	0.48125	0.51027	1.4641	30.834	0.91923	0.99573	9.24e-209	1.6e-208
MANEAL	12	0.20896	7.6971	0.95397	0.99566	1.39e-14	3.26e-14	2.288	84.832	0.16997	0.78341	0	0
C1QTNF7	5	0.38466	7.4498	0.53667	0.95851	9.35e-14	2.11e-13	-0.70794	-8.7003	0.015581	0.342	3.31e-18	3.67e-18
CDHR5	5	0.16458	4.261	0.93564	0.99473	2.04e-05	3.08e-05	2.4371	63.741	0.099184	0.65971	0	0
ADD1	5	0.30367	7.304	0.72139	0.97959	2.79e-13	6.18e-13	1.2736	28.939	0.68296	0.98041	3.86e-184	6.25e-184
NPAS4	5	0.27022	6.906	0.80111	0.98428	4.99e-12	1.04e-11	1.8319	46.256	0.59584	0.9654	0	0
CRYBB3	5	0.52335	13.483	0.29328	0.88817	1.98e-41	1.23e-40	1.1349	27.89	0.53523	0.95626	3.56e-171	5.57e-171
PLCXD3	5	0.26359	5.7982	0.81727	0.98557	6.7e-09	1.21e-08	0.17371	3.193	0.071031	0.59268	0.0014081	0.0014636
FAM173A	5	-0.23682	-5.5572	0.2178	0.82803	2.74e-08	4.8e-08	2.1455	51.531	0.26751	0.8618	0	0
ZNF507	5	0.38661	9.6511	0.53269	0.95851	4.86e-22	1.53e-21	1.871	45.848	0.5482	0.95959	0	0
SLC6A14	5	-0.12868	-3.1522	0.34294	0.91577	0.0016206	0.0021709	2.116	52.578	0.29207	0.87607	0	0
COG7	5	0.29444	6.6945	0.74338	0.98069	2.16e-11	4.4e-11	2.8336	67.044	0.018446	0.36447	0	0
P2RY1	5	0.053338	1.3807	0.67055	0.97606	0.16738	0.18884	1.4867	37.884	0.94843	0.99718	0	0
CLEC14A	5	0.7516	19.133	0.08398	0.62092	1.35e-81	2.34e-80	1.4211	34.095	0.86312	0.99172	8.67e-255	1.7e-254
APH1B	5	0.018016	0.43529	0.59515	0.96927	0.66335	0.68728	1.6512	39.335	0.83313	0.98873	0	0
C8orf87	5	-0.021278	-0.51067	0.51679	0.95738	0.60958	0.63637	1.5275	35.872	0.99705	0.9994	8.46e-282	1.81e-281
PPP6R2	5	-0.028044	-0.723	0.50464	0.95575	0.46968	0.49902	1.3073	32.896	0.72219	0.9818	2.53e-237	4.74e-237
VWC2	5	0.069305	1.8089	0.70716	0.97763	0.070463	0.082583	1.6735	43.427	0.80319	0.98659	0	0
SLC17A4	5	0.3533	9.0639	0.60595	0.97185	1.26e-19	3.63e-19	2.0807	53.085	0.32367	0.89056	0	0
CAMK1	5	0.42864	10.848	0.44952	0.94612	2.04e-27	7.93e-27	0.96805	22.402	0.39036	0.9167	3.78e-111	5.14e-111
CITED1	5	0.18433	4.5812	0.98484	0.99876	4.62e-06	7.24e-06	0.81533	18.474	0.28572	0.87167	3.34e-76	4.22e-76
BFSP2	5	0.11004	2.6441	0.80358	0.98428	0.0081904	0.010423	2.3968	58.118	0.11483	0.69491	0	0
AGPAT3	5	-0.35999	-8.7829	0.12681	0.70903	1.59e-18	4.4e-18	1.583	38.762	0.92323	0.99583	0	0
ADORA3	12	0.28994	11.132	0.75405	0.98201	8.76e-29	3.56e-28	1.1598	41.827	0.5596	0.96212	0	0
CPZ	5	0.43001	11.263	0.44679	0.94406	2e-29	8.33e-29	1.6507	42.378	0.83384	0.98873	0	0
ATP6V1G2	7	-0.23424	-6.8877	0.22035	0.82965	5.67e-12	1.18e-11	1.7432	51.49	0.70935	0.98166	0	0
GNG8	5	0.33578	8.7516	0.64679	0.97483	2.1e-18	5.79e-18	1.6815	43.035	0.79236	0.98659	0	0
VSTM4	5	0.51276	13.247	0.30847	0.89601	4.72e-40	2.8e-39	1.9337	49.31	0.47486	0.94059	0	0
CD96	5	0.3086	7.5082	0.70999	0.97769	6e-14	1.37e-13	1.2472	28.548	0.6533	0.97712	2.94e-179	4.71e-179
TLK1	5	0.27549	5.8934	0.78854	0.98425	3.78e-09	6.92e-09	1.761	36.257	0.68588	0.98041	7.66e-288	1.67e-287
NANS	5	-0.98474	-21.451	0.0086512	0.19478	4.5e-102	1.15e-100	1.1121	24.679	0.51345	0.94861	1.79e-134	2.57e-134
SPATS1	5	0.56144	13.725	0.24252	0.85346	7.17e-43	4.63e-42	1.2271	27.974	0.63106	0.97217	3.39e-172	5.32e-172
GEM	5	0.35967	9.2344	0.59108	0.96908	2.6e-20	7.68e-20	1.2167	29.969	0.61978	0.97184	2.52e-197	4.21e-197
C5AR1	5	0.14791	3.8108	0.89456	0.99436	0.00013852	0.00019908	1.2516	31.155	0.65847	0.97814	4.38e-213	7.66e-213
LY6G6C	5	0.0179	0.39572	0.59494	0.96927	0.69231	0.71514	1.5497	33.602	0.96796	0.99835	1.54e-247	2.98e-247
HIC1	5	0.10355	2.4612	0.78784	0.98425	0.013846	0.01728	1.8131	42.765	0.61896	0.97155	0	0
TG	5	0.3548	8.879	0.60211	0.97085	6.74e-19	1.89e-18	0.78721	18.539	0.26991	0.86246	1e-76	1.27e-76
DNAJC18	5	0.75616	19.088	0.081737	0.61323	3.18e-81	5.45e-80	1.2353	29.098	0.64001	0.97397	3.86e-186	6.28e-186
S100A13	5	0.35614	8.9355	0.59876	0.97013	4.05e-19	1.14e-18	1.5475	37.792	0.97087	0.99835	0	0
PLSCR2	5	-0.1444	-3.5363	0.32144	0.90034	0.00040571	0.00056451	1.4396	34.846	0.88713	0.99306	4.92e-266	1e-265
DPPA2	5	0.45915	11.214	0.39479	0.9328	3.49e-29	1.44e-28	0.84931	18.578	0.30684	0.88534	4.85e-77	6.13e-77
RAB25	5	0.16068	4.0955	0.92578	0.99473	4.21e-05	6.26e-05	1.6429	41.146	0.84389	0.98989	0	0
TEKT2	5	0.36931	9.5015	0.56917	0.96365	2.07e-21	6.37e-21	1.1114	26.959	0.51269	0.94843	4.45e-160	6.75e-160
FOXO1	5	-0.31426	-7.8429	0.15473	0.75478	4.4e-15	1.06e-14	1.2042	29.456	0.60631	0.96782	1.05e-190	1.73e-190
SUGP2	5	-0.38248	-8.5947	0.11516	0.69015	8.35e-18	2.23e-17	1.445	32.296	0.89416	0.99355	7.97e-229	1.46e-228
MFSD1	5	0.094793	2.2752	0.76701	0.98327	0.022892	0.028076	1.6115	37.958	0.88637	0.99306	0	0
MFAP4	5	-0.069538	-1.6899	0.43327	0.941	0.091053	0.10549	1.7505	42.449	0.69988	0.98041	0	0
OTOG	5	0.32399	8.1904	0.67423	0.97613	2.6e-16	6.54e-16	1.2824	31.2	0.69282	0.98041	1.07e-213	1.88e-213
NEUROG3	5	0.051864	1.3414	0.66721	0.97606	0.1798	0.20209	1.1342	28.232	0.53457	0.95565	2.35e-175	3.72e-175
GLRA2	5	-0.024878	-0.53836	0.51016	0.95666	0.59033	0.61741	0.55693	10.364	0.16591	0.77823	3.63e-25	4.1e-25
KRT72	5	0.24336	5.1708	0.86774	0.99054	2.33e-07	3.91e-07	1.3363	26.743	0.75768	0.98553	1.49e-157	2.24e-157
GTF3C6	5	0.54038	10.459	0.26984	0.87534	1.33e-25	4.84e-25	0.94176	15.621	0.36973	0.90995	5.25e-55	6.35e-55
RASIP1	5	-0.15452	-3.5724	0.30908	0.89601	0.00035368	0.00049372	2.0739	48.466	0.33035	0.89278	0	0
ZNF585B	5	0.45662	9.5625	0.39912	0.93469	1.15e-21	3.58e-21	1.7651	35.954	0.68052	0.98041	4.35e-283	9.33e-283
GAS2L3	5	0.51489	11.447	0.30543	0.89601	2.43e-30	1.05e-29	1.6308	34.535	0.86017	0.99146	2.37e-261	4.75e-261
C14orf166B	5	0.22948	5.7922	0.90317	0.99436	6.95e-09	1.25e-08	1.7545	43.669	0.69454	0.98041	0	0
KRTAP8-1	2	0.78372	13.005	0.069332	0.57197	1.14e-38	6.47e-38	1.5589	25.027	0.95572	0.99817	3.1e-138	4.49e-138
FAM114A1	5	0.39134	9.9453	0.52289	0.95738	2.64e-23	8.74e-23	2.1785	55.167	0.24269	0.84948	0	0
FIBCD1	5	-0.25098	-5.7122	0.20538	0.81677	1.12e-08	1.99e-08	2.7556	66.169	0.026542	0.41224	0	0
WDR31	5	0.44632	10.435	0.4167	0.93607	1.71e-25	6.18e-25	1.811	41.317	0.62183	0.97217	0	0
MTERFD2	5	0.89812	16.995	0.034272	0.41519	8.93e-65	1.05e-63	0.075957	0.84785	0.057716	0.54705	0.39652	0.40055
TRUB2	5	1.0129	18.58	0.016681	0.28154	4.63e-77	7.32e-76	-0.87874	-5.8814	0.012516	0.3224	4.07e-09	4.37e-09
SAA2	5	0.0505	1.113	0.664	0.97606	0.2657	0.2922	1.4782	31.934	0.93724	0.99718	9.08e-224	1.64e-223
OSER1	5	-0.15839	-3.6292	0.30424	0.89577	0.00028428	0.00039966	1.2578	28.123	0.66511	0.97939	5.19e-174	8.19e-174
MYO1C	5	-0.0070445	-0.18025	0.54371	0.95988	0.85695	0.86996	1.4943	37.63	0.95884	0.99835	7.0331e-310	0
PROSER2	5	0.29308	7.5024	0.7467	0.98069	6.27e-14	1.43e-13	1.7853	45.125	0.65428	0.97732	0	0
FGF23	5	0.15681	3.7846	0.91635	0.99473	0.00015397	0.0002208	1.4243	33.33	0.86726	0.99172	1.44e-243	2.76e-243
ACOT7	5	0.22343	5.9158	0.9184	0.99473	3.3e-09	6.06e-09	2.102	55.649	0.30434	0.8847	0	0
EMC8	5	0.16875	4.0662	0.94582	0.99524	4.78e-05	7.08e-05	1.724	40.873	0.73377	0.98248	0	0
COL6A3	5	0.13755	3.3999	0.8697	0.99122	0.00067421	0.00092517	2.1268	52.73	0.28284	0.86922	0	0
HIST1H4G	5	0.23612	5.3359	0.8861	0.99433	9.51e-08	1.62e-07	1.0579	22.64	0.46448	0.93789	1.75e-113	2.39e-113
NUPR1L	5	0.13195	3.0059	0.85582	0.9902	0.0026481	0.0034953	0.88524	18.877	0.32966	0.8924	1.76e-79	2.24e-79
ZNF438	5	-0.052331	-1.3129	0.46177	0.95034	0.18922	0.21204	1.7815	44.6	0.65906	0.97814	0	0
CREBBP	5	-0.80144	-19.015	0.017836	0.292	1.27e-80	2.15e-79	1.532	37.558	0.99164	0.99928	0	2.4e-308
LSS	5	-0.12938	-3.2798	0.34198	0.91577	0.0010388	0.0014082	2.1123	54.135	0.29493	0.87845	0	0
ABHD2	5	0.037272	0.86906	0.63544	0.97483	0.38481	0.41418	0.17902	3.4467	0.071842	0.59677	0.00056746	0.00059144
FAM47C	5	0.14612	3.352	0.8902	0.99433	0.00080232	0.001095	1.8059	41.069	0.62812	0.97217	0	0
RND1	5	0.56254	14.156	0.24119	0.85206	1.72e-45	1.19e-44	2.7365	69.466	0.028786	0.42197	0	0
PTPN4	5	0.36493	9.1378	0.57955	0.96636	6.38e-20	1.86e-19	1.6245	39.452	0.86852	0.99174	0	0
HIST1H3C	5	0.68446	17.875	0.12423	0.70465	1.85e-71	2.56e-70	1.9937	51.252	0.40961	0.92608	0	0
HYAL2	5	0.73578	19.351	0.091843	0.63776	1.99e-83	3.55e-82	2.0358	52.793	0.36756	0.90926	0	0
ANTXR1	5	-0.25868	-5.5701	0.19897	0.81289	2.55e-08	4.47e-08	1.7251	37.453	0.73229	0.98209	5.37e-307	1.24e-306
CXorf22	5	0.31343	6.7798	0.69822	0.97759	1.2e-11	2.47e-11	1.2271	24.631	0.63107	0.97217	5.93e-134	8.49e-134
GRID1	5	0.07624	1.9807	0.72286	0.97959	0.047624	0.056799	2.1311	55.624	0.27936	0.86837	0	0
METTL24	5	0.25809	6.4944	0.83135	0.98728	8.34e-11	1.65e-10	1.3573	33.021	0.7841	0.98659	4.04e-239	7.62e-239
PLA2G12B	5	0.49324	12.417	0.33858	0.91476	2.12e-35	1.09e-34	0.91707	21.217	0.35184	0.90122	6.64e-100	8.8e-100
BTBD3	5	-0.15008	-3.1277	0.31438	0.8975	0.0017621	0.0023531	2.2878	49.603	0.17001	0.78341	0	0
ASF1A	5	0.87377	20.93	0.039636	0.44663	2.87e-97	6.77e-96	-0.68908	-9.7891	0.015903	0.342	1.25e-22	1.41e-22
ARMC10	5	0.02251	0.51393	0.60419	0.97141	0.6073	0.63428	0.79072	16.69	0.27192	0.86428	1.56e-62	1.92e-62
SHISA7	5	0.097889	2.5809	0.77439	0.9835	0.0098556	0.012456	1.5873	41.444	0.91783	0.99573	0	0
RFPL3	4	-0.20036	-4.4519	0.25513	0.86316	8.51e-06	1.31e-05	0.3469	6.9428	0.10483	0.67219	3.84e-12	4.17e-12
ARHGEF26	5	0.67923	17.332	0.12804	0.71229	2.69e-67	3.37e-66	2.4239	61.61	0.10379	0.66924	0	0
APOBEC2	5	0.047501	1.1923	0.65738	0.97493	0.23313	0.25849	1.7418	43.336	0.71126	0.98169	0	0
SEMA4F	5	-0.13745	-3.4203	0.33098	0.90813	0.00062546	0.00085978	0.96114	22.791	0.38447	0.91405	5.61e-115	7.69e-115
C7orf43	5	-0.22907	-5.2023	0.22541	0.83171	1.97e-07	3.31e-07	1.1372	25.02	0.53768	0.95724	3.69e-138	5.33e-138
RERG	5	0.31314	6.7358	0.6988	0.97759	1.63e-11	3.33e-11	0.98604	18.694	0.4044	0.92317	5.53e-78	7.01e-78
ALPK2	5	0.023002	0.58994	0.60531	0.97185	0.55523	0.58301	1.7523	44.68	0.6973	0.98041	0	0
KCND3	5	0.068665	1.7261	0.70572	0.97763	0.084321	0.0981	2.0788	52.449	0.32549	0.89056	0	0
SMIM9	5	-0.23357	-5.1476	0.22103	0.83022	2.64e-07	4.41e-07	1.3399	28.872	0.76203	0.98553	2.68e-183	4.33e-183
SULT1A2	4	0.43805	9.8004	0.43206	0.94022	1.12e-22	3.62e-22	0.62795	12.508	0.19344	0.81163	6.78e-36	7.86e-36
VGLL4	5	0.42082	11.074	0.46432	0.95066	1.67e-28	6.74e-28	1.5385	39.569	0.98284	0.99835	0	0
ZNF268	19	0.23147	9.7203	0.89811	0.99436	2.47e-22	7.89e-22	1.1922	46.37	0.59379	0.9654	0	0
HTR1D	5	0.11705	2.8674	0.81993	0.98626	0.0041388	0.0053887	1.8589	45.252	0.56235	0.96223	0	0
ITGA11	5	0.68937	15.903	0.12087	0.69878	6e-57	5.77e-56	1.9816	44.742	0.42206	0.92965	0	0
CNGA2	5	0.31414	7.9002	0.69636	0.97759	2.78e-15	6.73e-15	1.0142	23.595	0.42713	0.93034	4.35e-123	6.07e-123
SPINT1	5	-0.13411	-3.4263	0.33555	0.91245	0.0006118	0.00084197	1.2777	31.973	0.68751	0.98041	2.62e-224	4.73e-224
SIGLEC8	5	0.42519	10.073	0.45628	0.94974	7.25e-24	2.45e-23	0.90982	19.545	0.34669	0.8978	4.54e-85	5.83e-85
MN1	5	0.34854	8.8478	0.61646	0.97329	8.92e-19	2.49e-18	1.5708	39.078	0.93955	0.99718	0	0
HINT3	5	-0.043805	-1.0407	0.47574	0.95217	0.29801	0.32579	0.95523	21.54	0.38012	0.9126	6.57e-103	8.77e-103
IGFBP1	5	-0.013556	-0.33138	0.53129	0.95845	0.74035	0.76067	1.4391	34.308	0.88641	0.99306	5.96e-258	1.18e-257
DENND4C	5	-0.31132	-7.354	0.1565	0.75675	1.92e-13	4.29e-13	1.5369	36.22	0.98505	0.99865	3e-287	6.52e-287
ZNF536	5	-0.11515	-3.0013	0.36226	0.92155	0.0026881	0.0035455	2.1358	56.23	0.27555	0.86685	0	0
WLS	5	0.15713	3.9621	0.91712	0.99473	7.43e-05	0.00010878	2.1675	54.933	0.25066	0.85679	0	0
DIO2	5	-0.0054846	-0.13925	0.54674	0.95988	0.88925	0.89969	1.3386	33.154	0.76053	0.98553	4.95e-241	9.39e-241
FAM24B	5	0.49121	12.82	0.34204	0.91577	1.26e-37	6.94e-37	2.1852	56.752	0.23797	0.84645	0	0
MSLN	5	-0.1018	-2.6279	0.38178	0.92608	0.0085904	0.010912	1.6192	41.572	0.87556	0.99206	0	0
SLC39A12	5	0.25427	5.6626	0.84095	0.98892	1.49e-08	2.65e-08	1.7275	37.241	0.72925	0.9818	1.49e-303	3.41e-303
MAG	5	-0.2553	-5.736	0.20177	0.81526	9.69e-09	1.74e-08	0.96279	20.782	0.38593	0.91447	6.26e-96	8.23e-96
FBXL20	5	-2.6753	-53.989	0.00047754	0.081675	0	0	-2.4701	-32.562	0.0022433	0.202	1.42e-232	2.63e-232
GNAL	12	0.095006	3.601	0.76761	0.98342	0.00031701	0.00044408	1.2375	44.671	0.64256	0.97509	0	0
FAM19A4	5	0.46908	11.707	0.37826	0.92552	1.17e-31	5.31e-31	2.078	51.303	0.32617	0.89066	0	0
MPO	5	0.33388	8.7899	0.65115	0.97483	1.5e-18	4.13e-18	1.5236	39.332	0.99766	0.9994	0	0
PTH2R	5	0.82541	17.567	0.053851	0.51421	4.38e-69	5.7e-68	1.2141	22.649	0.61708	0.9707	1.42e-113	1.94e-113
DIRC2	5	-0.44484	-9.3086	0.086757	0.62379	1.29e-20	3.87e-20	1.1019	22.313	0.50408	0.9472	2.76e-110	3.75e-110
TJP2	5	0.25719	6.6784	0.83343	0.98745	2.41e-11	4.9e-11	1.3134	33.067	0.72955	0.9818	8.8e-240	1.66e-239
HPCAL1	5	0.33429	7.5487	0.65032	0.97483	4.4e-14	1.01e-13	0.5322	10.564	0.15744	0.76529	4.36e-26	4.94e-26
CCDC169	11	0.02237	0.69612	0.60388	0.97126	0.48635	0.51531	1.5167	45.823	0.98828	0.99928	0	0
EME1	5	-1.0814	-23.38	0.0060747	0.16451	6.78e-121	2.33e-119	0.079917	1.5551	0.058171	0.54825	0.11993	0.1223
SERTAD4	5	0.44766	9.7493	0.41443	0.93592	1.86e-22	5.96e-22	1.9354	41.28	0.47287	0.93873	0	0
FAM43A	5	0.50932	12.5	0.3138	0.89675	7.48e-36	3.89e-35	1.7959	43.225	0.64099	0.9747	0	0
COLEC12	5	0.1767	4.4062	0.96601	0.99767	1.05e-05	1.61e-05	1.6717	41.056	0.80546	0.98659	0	0
TIFAB	5	-0.28339	-6.6162	0.17749	0.78396	3.69e-11	7.41e-11	1.2865	29.458	0.69746	0.98041	1e-190	1.65e-190
TOX	5	0.27511	7.003	0.78949	0.98425	2.5e-12	5.31e-12	1.7799	44.856	0.66126	0.97839	0	0
TFPT	5	0.0067243	0.172	0.571	0.96365	0.86344	0.87599	0.083715	1.883	0.058615	0.5501	0.059706	0.06111
TTC30B	5	0.42403	9.8034	0.45835	0.94974	1.09e-22	3.52e-22	-0.27342	-4.8709	0.029929	0.42812	1.11e-06	1.18e-06
BAD	5	0.51128	13.477	0.31067	0.89601	2.15e-41	1.33e-40	1.9284	50.254	0.48073	0.94096	0	0
FXYD4	5	0.38581	9.7975	0.5345	0.95851	1.15e-22	3.73e-22	0.85744	20.428	0.31216	0.88644	9.44e-93	1.23e-92
SCNN1B	5	0.04543	1.151	0.65265	0.97483	0.24974	0.27593	1.4257	35.412	0.86905	0.99174	1.12e-274	2.35e-274
SP7	5	0.34089	8.4081	0.63495	0.97483	4.17e-17	1.09e-16	2.0379	49.774	0.36526	0.90778	0	0
GRM1	5	0.6018	15.438	0.19547	0.80943	9.08e-54	7.95e-53	2.2041	56.073	0.2242	0.83512	0	0
DPM3	8	0.39514	12.353	0.51482	0.95738	4.71e-35	2.4e-34	1.4939	45.001	0.95838	0.99832	0	0
TMPRSS7	5	0.12683	2.7477	0.8442	0.98892	0.0060016	0.0077213	1.2437	25.416	0.64941	0.97693	1.68e-142	2.45e-142
CMTM2	5	-0.28752	-6.9632	0.17404	0.7783	3.33e-12	7e-12	1.1969	28.115	0.59841	0.9654	6.46e-174	1.02e-173
PPP2R5A	5	-0.9685	-19.878	0.0091621	0.20122	6.34e-88	1.25e-86	1.348	29.007	0.77245	0.98659	5.42e-185	8.8e-185
PKDREJ	5	0.26437	6.676	0.8153	0.98536	2.46e-11	4.98e-11	1.5104	37.466	0.97973	0.99835	3.28e-307	7.62e-307
NRXN2	5	0.182	4.4446	0.97878	0.99837	8.81e-06	1.36e-05	1.6677	39.981	0.81051	0.98659	0	0
C2orf44	5	-0.23922	-4.8333	0.21553	0.82548	1.34e-06	2.16e-06	1.335	26.102	0.75599	0.98553	3.48e-150	5.18e-150
OMA1	5	0.10974	2.4627	0.80287	0.98428	0.013791	0.017217	0.25351	4.6723	0.08508	0.63033	2.98e-06	3.15e-06
DGCR8	5	-0.12235	-2.3076	0.35219	0.91931	0.021022	0.025857	0.95547	16.457	0.38031	0.9126	7.44e-61	9.11e-61
MPZL1	6	-0.020194	-0.49541	0.51877	0.95738	0.62031	0.64659	0.66938	14.556	0.21056	0.82398	5.37e-48	6.39e-48
RASSF3	5	0.81503	18.478	0.057316	0.52423	3.08e-76	4.75e-75	1.3395	26.995	0.76167	0.98553	1.68e-160	2.55e-160
CD79B	8	-0.29875	-9.2793	0.16568	0.76882	1.71e-20	5.08e-20	1.706	53.246	0.75904	0.98553	0	0
GJD4	5	-0.32621	-7.4796	0.14714	0.74587	7.46e-14	1.69e-13	0.43796	9.4436	0.12884	0.72393	3.6e-21	4.03e-21
ADRA1A	5	-0.20596	-5.1426	0.24896	0.85842	2.71e-07	4.53e-07	1.5831	39.366	0.92306	0.99583	0	0
RABGAP1L	15	-0.038247	-1.4963	0.48606	0.95304	0.13457	0.15324	1.1524	42.781	0.55215	0.96153	0	0
CBY3	5	-0.026602	-0.68998	0.50715	0.95634	0.49021	0.51909	1.8465	47.88	0.57782	0.9654	0	0
TOR1AIP1	5	0.70415	18.493	0.11047	0.67921	2.33e-76	3.61e-75	1.9098	49.334	0.50215	0.9466	0	0
OLR1	5	0.22145	5.3599	0.92345	0.99473	8.33e-08	1.43e-07	1.6227	38.2	0.87108	0.99193	0	0
CEP135	5	-0.44631	-9.1875	0.086368	0.62298	4.02e-20	1.18e-19	1.3329	27.144	0.75358	0.98503	2.97e-162	4.54e-162
DYX1C1	5	0.2447	6.0294	0.86429	0.99054	1.65e-09	3.06e-09	1.3983	32.816	0.83498	0.98873	3.47e-236	6.49e-236
GLUD1	5	-0.30258	-6.2753	0.1627	0.76441	3.49e-10	6.69e-10	1.8445	38.818	0.58029	0.9654	0	0
INS	5	0.027753	0.61529	0.61519	0.97329	0.53836	0.56645	2.0739	46.293	0.33035	0.89278	0	0
COMMD7	5	0.2247	5.7115	0.9153	0.99473	1.12e-08	2e-08	1.5128	37.344	0.98298	0.99835	3.12e-305	7.2e-305
PAPL	5	-0.0026495	-0.06769	0.55253	0.96187	0.94603	0.9511	1.903	48.658	0.50997	0.94814	0	0
ANKRD18A	5	0.076937	1.8658	0.72439	0.97959	0.06207	0.073142	2.2986	56.7	0.16384	0.77505	0	0
WNT11	5	0.56452	14.488	0.23869	0.84789	1.44e-47	1.07e-46	2.0787	52.795	0.32552	0.89056	0	0
RAB40C	5	0.33781	8.3795	0.64196	0.97483	5.32e-17	1.38e-16	1.5241	36.408	0.99832	0.9996	3.24e-290	7.11e-290
SLC25A34	5	0.51226	13.414	0.30918	0.89601	5.01e-41	3.06e-40	1.3927	35.088	0.82765	0.98872	1.02e-269	2.1e-269
CABLES1	5	-0.031211	-0.79811	0.49868	0.95459	0.42481	0.45448	2.0713	53.346	0.33283	0.89371	0	0
ZNF446	5	0.35124	8.9419	0.61015	0.97222	3.83e-19	1.08e-18	2.1109	53.492	0.29614	0.8792	0	0
TBC1D22A	5	0.02347	0.61172	0.60633	0.97185	0.54072	0.56883	1.7916	46.532	0.64609	0.97607	0	0
SPOCK1	5	0.24086	5.9629	0.87401	0.9925	2.48e-09	4.57e-09	1.0485	24.569	0.45615	0.93789	2.69e-133	3.85e-133
ZNF737	5	-0.34804	-6.4931	0.1334	0.72156	8.41e-11	1.66e-10	1.1722	21.092	0.5725	0.9642	9.52e-99	1.26e-98
ZNF451	10	0.29781	10.485	0.73555	0.97993	1.01e-25	3.7e-25	1.4565	49.738	0.90925	0.99482	0	0
UBE4B	5	-0.30387	-7.3838	0.16165	0.76269	1.54e-13	3.44e-13	0.87667	20.06	0.32429	0.89056	1.66e-89	2.15e-89
SHROOM3	5	0.6228	15.596	0.17495	0.77985	7.73e-55	6.99e-54	1.3496	31.697	0.77445	0.98659	1.72e-220	3.06e-220
WNT2B	5	0.23301	5.9996	0.89411	0.99436	1.98e-09	3.67e-09	1.2446	30.662	0.6502	0.97693	1.84e-206	3.16e-206
PKD1L1	5	0.39339	9.5282	0.51849	0.95738	1.6e-21	4.96e-21	1.1129	24.929	0.51418	0.94861	3.61e-137	5.21e-137
LGSN	5	0.032803	23.899	0.62572	0.97483	3.13e-126	1.17e-124	0.25141	184.29	0.084724	0.62972	0	0
CLEC10A	5	-0.089523	-2.0956	0.40121	0.93494	0.036114	0.043521	1.0527	23.769	0.45956	0.93789	7.01e-125	9.81e-125
FKRP	5	0.32852	8.6419	0.66341	0.97602	5.53e-18	1.49e-17	2.0318	53.211	0.37139	0.91109	0	0
FCRL6	5	-0.48555	-11.747	0.072542	0.58347	7.28e-32	3.32e-31	1.1156	26.428	0.51685	0.94861	6.61e-154	9.89e-154
PIKFYVE	5	0.045207	0.98656	0.6523	0.97483	0.32386	0.35208	1.7112	36.968	0.75205	0.98503	3.67e-299	8.29e-299
LOR	5	0.0043968	0.1155	0.56637	0.96337	0.90804	0.91624	1.5108	39.209	0.98039	0.99835	0	0
TMEM132E	5	0.64173	16.765	0.15739	0.75675	4.4e-63	4.95e-62	1.5944	40.62	0.9081	0.99482	0	0
TBXA2R	5	-0.1046	-2.6735	0.37778	0.92552	0.0075067	0.0095838	1.9456	49.953	0.46108	0.93789	0	0
FAM178A	8	-0.15989	-4.833	0.30226	0.89448	1.35e-06	2.16e-06	1.2045	35.376	0.60652	0.96788	4.03e-274	8.41e-274
PNPLA6	5	-0.048118	-1.2347	0.46848	0.95069	0.21696	0.24131	1.5505	39.322	0.96683	0.99835	0	0
RNF31	5	0.39037	10.237	0.52473	0.95755	1.36e-24	4.72e-24	1.5832	40.729	0.92296	0.99583	0	0
2022-03-01	5	0.12313	2.9402	0.83485	0.98814	0.00328	0.0043041	1.4919	34.569	0.95558	0.99817	7.4e-262	1.49e-261
S100A8	5	-0.03241	-0.67519	0.49666	0.95441	0.49956	0.52834	0.44592	7.9976	0.13092	0.7257	1.27e-15	1.39e-15
CYP2E1	5	0.29349	7.6226	0.74564	0.98069	2.49e-14	5.77e-14	2.0783	53.831	0.32589	0.89056	0	0
KAZALD1	5	0.49592	13.069	0.33459	0.91223	4.96e-39	2.84e-38	1.4633	37.655	0.91817	0.99573	2.6797e-310	6.2959e-310
FOXD2	5	0.17789	4.7331	0.96865	0.99767	2.21e-06	3.52e-06	1.7458	46.167	0.70585	0.98129	0	0
DKK4	5	0.048553	1.1151	0.65949	0.97525	0.26479	0.29125	1.7463	39.581	0.70507	0.98106	0	0
TIMM44	5	0.7889	16.681	0.066955	0.56125	1.8e-62	2.01e-61	1.3482	25.264	0.77274	0.98659	8.01e-141	1.17e-140
TMPRSS15	5	-0.046034	-0.96017	0.4721	0.95112	0.33697	0.3653	2.3277	50.663	0.14759	0.74979	0	0
ABCB4	5	-0.29438	-7.0554	0.16882	0.77438	1.72e-12	3.67e-12	1.5951	38.249	0.90727	0.99482	0	0
MTMR2	5	1.2018	25.283	0.0057305	0.1621	4.93e-141	2.27e-139	1.5722	30.306	0.9378	0.99718	9.53e-202	1.62e-201
INHA	5	-0.021217	-0.48685	0.51686	0.95738	0.62636	0.6523	1.6674	38.006	0.81091	0.98659	0	0
HEMK1	5	0.27557	6.8855	0.78828	0.98425	5.76e-12	1.2e-11	2.1965	54.975	0.22952	0.83798	0	0
RALGPS2	5	-0.22513	-5.0955	0.22901	0.83638	3.48e-07	5.78e-07	1.4714	32.772	0.9288	0.99718	1.46e-235	2.72e-235
STARD4	5	-0.9172	-16.337	0.011217	0.22799	5.34e-60	5.61e-59	1.1459	20.899	0.54593	0.95922	5.51e-97	7.26e-97
RBM15B	5	-0.45849	-11.275	0.082037	0.6143	1.75e-29	7.29e-29	0.92572	22.101	0.35789	0.90265	3.11e-108	4.19e-108
TM4SF1	5	0.27022	6.6367	0.80111	0.98428	3.21e-11	6.47e-11	1.3828	32.505	0.81563	0.98659	9.18e-232	1.7e-231
CDC42EP1	5	0.014096	0.36785	0.58672	0.9684	0.71299	0.73469	1.3432	34.328	0.76626	0.98659	2.98e-258	5.93e-258
HTR1B	5	0.1607	3.8533	0.92581	0.99473	0.00011653	0.00016837	2.3094	55.946	0.15784	0.76658	0	0
RMND5A	5	-0.31744	-6.5092	0.15278	0.75402	7.56e-11	1.5e-10	2.0298	43.507	0.37346	0.91109	0	0
PCDHGA11	5	0.48633	12.035	0.3498	0.91931	2.31e-33	1.11e-32	1.9277	46.735	0.48146	0.94096	0	0
GPR115	5	0.31968	7.8497	0.68375	0.97759	4.17e-15	1e-14	1.5651	36.836	0.94712	0.99718	4.84e-297	1.08e-296
AMBP	5	0.20877	5.2106	0.9544	0.99566	1.88e-07	3.17e-07	1.1582	27.6	0.55799	0.96183	1.13e-167	1.75e-167
EGFLAM	13	0.15856	6.384	0.92052	0.99473	1.73e-10	3.36e-10	1.7039	67.485	0.76197	0.98553	0	0
MTHFR	5	0.14582	3.6668	0.88957	0.99433	0.0002456	0.00034731	1.6641	41.156	0.81519	0.98659	0	0
AKT3	5	0.00091671	0.018675	0.55962	0.96337	0.9851	0.98636	0.94344	17.513	0.37116	0.91103	1.15e-68	1.43e-68
MYCBPAP	5	0.19196	4.6918	0.99561	0.99933	2.71e-06	4.29e-06	1.9242	46.68	0.48534	0.94096	0	0
AKAP4	5	0.20117	4.5178	0.97271	0.9982	6.25e-06	9.71e-06	1.9818	44.213	0.42179	0.92945	0	0
DRD2	5	0.22758	5.7359	0.90782	0.99436	9.7e-09	1.74e-08	1.0187	24.045	0.43105	0.93247	9.41e-128	1.33e-127
LY6D	5	0.24379	5.7653	0.86661	0.99054	8.15e-09	1.47e-08	1.326	30.381	0.74548	0.98427	9.94e-203	1.69e-202
ERCC1	5	-1.0378	-20.446	0.0070076	0.17479	6.54e-93	1.41e-91	-3.582	-15.782	0.00012216	0.17297	4.13e-56	5e-56
ZNF254	10	-0.016766	-0.48233	0.52513	0.95755	0.62957	0.65534	0.77112	18.909	0.26158	0.85952	9.54e-80	1.22e-79
TLCD1	5	0.059193	1.4191	0.68372	0.97759	0.15588	0.17642	1.2345	28.215	0.63927	0.97375	3.83e-175	6.05e-175
B3GNT1	5	0.05043	1.2371	0.66386	0.97606	0.21606	0.24039	2.1529	53.182	0.2617	0.85952	0	0
TULP4	5	0.12711	3.2815	0.84498	0.98892	0.0010327	0.0014004	1.3979	35.246	0.83426	0.98873	3.9e-272	8.09e-272
RPP30	5	0.41514	5.652	0.47565	0.9521	1.59e-08	2.81e-08	1.8495	24.038	0.57394	0.9642	1.13e-127	1.59e-127
ZNF613	5	0.57069	11.968	0.23086	0.83856	5.25e-33	2.5e-32	0.86568	15.679	0.31747	0.88795	2.11e-55	2.55e-55
VSTM2B	5	0.32176	8.2205	0.6793	0.97658	2.03e-16	5.12e-16	1.2909	31.435	0.70233	0.98041	6.8e-217	1.2e-216
KDM4E	5	-0.13345	-3.0737	0.33658	0.913	0.0021144	0.0028097	2.127	50.19	0.2826	0.86922	0	0
GPR35	5	0.35436	9.3529	0.60322	0.97107	8.53e-21	2.57e-20	1.8197	47.642	0.61082	0.96898	0	0
FOXL2	5	0.26047	6.187	0.82545	0.98661	6.13e-10	1.16e-09	2.0847	49.418	0.3197	0.88847	0	0
UBOX5	5	0.090312	2.2495	0.75616	0.98201	0.024481	0.029955	1.3266	31.778	0.7464	0.98469	1.3e-221	2.32e-221
ABHD8	5	-0.27515	-6.7083	0.18473	0.79512	1.97e-11	4.01e-11	1.5182	36.823	0.99019	0.99928	7.83e-297	1.75e-296
SFRP1	5	0.011865	0.30355	0.58193	0.96636	0.76147	0.78054	1.2453	31.123	0.651	0.97693	1.18e-212	2.06e-212
ALOX12B	5	0.25613	6.6549	0.8362	0.98816	2.83e-11	5.73e-11	2.2208	57.832	0.21263	0.82629	0	0
HRCT1	5	-0.075438	-1.9441	0.42382	0.93857	0.051888	0.061655	0.87755	21.473	0.32477	0.89056	2.81e-102	3.75e-102
FUT2	5	0.31521	8.1929	0.69399	0.97759	2.55e-16	6.42e-16	1.999	51.653	0.40441	0.92317	0	0
CD86	5	0.80397	13.715	0.061614	0.54339	8.27e-43	5.33e-42	-1.334	-7.1738	0.008096	0.30654	7.29e-13	7.94e-13
FAM153B	5	0.28444	6.4283	0.76723	0.9833	1.29e-10	2.53e-10	0.73308	15.287	0.24095	0.84897	9.34e-53	1.12e-52
C1orf189	5	0.0043203	0.10443	0.56617	0.96337	0.91683	0.92427	2.3304	57.326	0.14612	0.74712	0	0
CNKSR3	5	0.25199	5.952	0.84658	0.98892	2.65e-09	4.88e-09	1.1736	26.172	0.57392	0.9642	5.56e-151	8.28e-151
STX4	5	0.52181	11.462	0.29535	0.88962	2.05e-30	8.85e-30	0.69415	12.274	0.22189	0.83439	1.24e-34	1.44e-34
KRT20	5	0.0088366	0.22335	0.57558	0.96537	0.82326	0.83797	2.0423	51.942	0.36083	0.90403	0	0
CYTIP	5	0.30569	6.9734	0.71665	0.97948	3.09e-12	6.52e-12	0.26438	5.2067	0.087068	0.63138	1.92e-07	2.05e-07
SFXN2	5	0.17282	4.4092	0.95607	0.99609	1.04e-05	1.59e-05	1.4592	36.113	0.91295	0.99519	1.4e-285	3.02e-285
2022-03-04	5	0.27473	6.777	0.79036	0.98425	1.23e-11	2.52e-11	1.8053	43.854	0.62893	0.97217	0	0
TMEM205	5	0.045373	1.1702	0.65257	0.97483	0.24191	0.26766	2.1747	56.541	0.2457	0.85231	0	0
ARC	5	0.49999	13.088	0.32819	0.90553	3.85e-39	2.21e-38	1.3698	34.602	0.79901	0.98659	2.38e-262	4.81e-262
EML5	5	-0.19473	-4.3378	0.26165	0.86899	1.44e-05	2.2e-05	1.1302	24.093	0.53063	0.95483	2.93e-128	4.14e-128
TMEM180	5	0.69244	17.207	0.11866	0.69789	2.33e-66	2.87e-65	0.77331	16.764	0.26257	0.85994	4.5e-63	5.53e-63
CTNND1	5	0.16055	3.9243	0.92546	0.99473	8.7e-05	0.00012686	2.1023	51.526	0.30405	0.8847	0	0
ROM1	5	0.077236	1.9851	0.72498	0.97959	0.047137	0.05624	1.6265	41.325	0.86587	0.99172	0	0
STYK1	5	0.1859	4.5747	0.98878	0.99876	4.77e-06	7.46e-06	0.67222	14.721	0.21183	0.82587	4.74e-49	5.64e-49
AVPR2	5	-0.026466	-0.67369	0.50742	0.95634	0.50051	0.52931	1.5458	38.784	0.97321	0.99835	0	0
WWP2	14	0.08974	3.7779	0.75472	0.98201	0.00015816	0.00022659	1.3902	57.182	0.82458	0.9885	0	0
NCKAP1	5	0.36649	9.4017	0.57577	0.96537	5.37e-21	1.63e-20	2.1633	55.333	0.25387	0.85859	0	0
C18orf21	7	-0.41306	-8.1325	0.10102	0.66281	4.21e-16	1.05e-15	1.113	20.772	0.51425	0.94861	7.72e-96	1.01e-95
PYROXD2	5	0.39352	9.8118	0.51817	0.95738	1e-22	3.24e-22	1.6138	39.24	0.88301	0.99296	0	0
SYCN	5	0.33023	8.7069	0.65936	0.97517	3.12e-18	8.51e-18	2.2892	60.456	0.1693	0.78341	0	0
CHCHD7	9	0.35131	7.9024	0.61008	0.97221	2.74e-15	6.61e-15	1.9139	41.973	0.49713	0.94606	0	0
ALDOC	5	0.5801	14.289	0.21911	0.82927	2.57e-46	1.82e-45	2.238	54.512	0.20118	0.81654	0	0
CBX4	5	-0.90227	-20.929	0.012005	0.2375	2.92e-97	6.88e-96	1.6507	39.856	0.83381	0.98873	0	0
RNF169	5	0.22128	5.7555	0.92379	0.99473	8.64e-09	1.55e-08	1.7386	44.668	0.71505	0.9818	0	0
H1FNT	5	0.079869	1.9856	0.73097	0.97993	0.047073	0.056172	1.338	31.915	0.75972	0.98553	1.67e-223	3.01e-223
CNFN	5	0.46191	12.07	0.39008	0.93034	1.53e-33	7.38e-33	2.2982	59.981	0.16417	0.77619	0	0
TTLL2	5	0.24034	6.1876	0.87572	0.99286	6.11e-10	1.16e-09	2.2988	59.509	0.16365	0.77457	0	0
APOBEC3H	5	-0.073577	-1.6038	0.42672	0.94019	0.10876	0.12504	1.3816	29.065	0.81417	0.98659	9.94e-186	1.62e-185
C3AR1	5	0.68409	17.087	0.12443	0.70465	1.84e-65	2.22e-64	0.87348	19.476	0.32232	0.89056	1.76e-84	2.26e-84
DIRC1	5	0.70713	15.682	0.10888	0.67777	2.01e-55	1.85e-54	1.3711	28.09	0.80092	0.98659	1.3e-173	2.05e-173
XPNPEP1	5	-1.1536	-27.81	0.004942	0.15008	3.32e-170	2.02e-168	0.79482	19.253	0.27416	0.86601	1.34e-82	1.72e-82
HMCES	5	-0.56266	-12.502	0.051052	0.50361	7.26e-36	3.78e-35	0.98076	21.097	0.4005	0.92252	8.53e-99	1.13e-98
PRPF3	5	0.024639	0.52178	0.60881	0.97221	0.60183	0.62874	1.1706	22.77	0.57086	0.9642	9.04e-115	1.24e-114
PPP1R37	5	-0.26053	-6.2596	0.19731	0.81177	3.86e-10	7.39e-10	1.1427	26.654	0.54304	0.95849	1.61e-156	2.42e-156
ABCC12	5	0.27973	7.1997	0.77843	0.9835	6.04e-13	1.31e-12	1.0955	26.748	0.49817	0.94638	1.31e-157	1.97e-157
LRRC20	10	0.39312	14.25	0.51912	0.95738	4.5e-46	3.18e-45	1.404	49.201	0.84222	0.98954	0	0
CPNE8	5	-0.01057	-0.2484	0.53693	0.95851	0.80383	0.8199	1.3463	30.526	0.77025	0.98659	1.16e-204	1.98e-204
ITCH	5	0.070502	1.7787	0.70983	0.97769	0.075282	0.088013	1.7054	42.521	0.75976	0.98553	0	0
C12orf39	5	0.17907	4.2961	0.97147	0.99784	1.74e-05	2.64e-05	1.8203	43.057	0.61013	0.96871	0	0
CYB561D1	12	0.45262	16.302	0.40606	0.9351	9.55e-60	9.96e-59	1.6323	56.798	0.85799	0.99087	0	0
THY1	5	0.25846	6.598	0.83028	0.98714	4.17e-11	8.35e-11	1.2762	31.461	0.68592	0.98041	2.98e-217	5.27e-217
SETD1B	5	0.25504	5.7064	0.83881	0.98874	1.15e-08	2.06e-08	1.7566	38.076	0.69168	0.98041	0	0
ZSCAN1	5	0.10262	2.6127	0.78563	0.98425	0.0089825	0.011389	1.1307	27.433	0.53118	0.95483	1.12e-165	1.72e-165
NOV	5	0.45697	11.21	0.39828	0.93434	3.62e-29	1.5e-28	0.71668	15.905	0.23234	0.84076	5.84e-57	7.08e-57
SLC35B3	5	0.74372	17.276	0.087667	0.62626	7.19e-67	8.94e-66	1.5174	32.882	0.98912	0.99928	4e-237	7.51e-237
WBSCR27	5	0.38836	9.641	0.52909	0.95782	5.37e-22	1.69e-21	1.1569	27.161	0.55679	0.96183	1.86e-162	2.85e-162
DDI1	5	0.76339	19.667	0.078383	0.60273	4.13e-86	7.82e-85	1.8438	46.104	0.5814	0.9654	0	0
CCNF	5	0.42511	9.0639	0.45638	0.94974	1.26e-19	3.63e-19	0.51312	7.8782	0.15109	0.7549	3.32e-15	3.65e-15
DNAJC5	5	-0.22927	-5.2007	0.22518	0.83171	1.99e-07	3.34e-07	1.3972	31.329	0.83336	0.98873	1.87e-215	3.29e-215
METTL13	5	-0.55426	-13.413	0.053196	0.51203	5.05e-41	3.09e-40	0.075449	1.5688	0.05766	0.54692	0.11669	0.11906
RBM47	5	0.048235	1.2679	0.65879	0.97495	0.20484	0.22857	2.4215	64.278	0.10457	0.67161	0	0
NPHP4	5	0.16368	4.2555	0.93328	0.99473	2.09e-05	3.15e-05	0.52672	12.542	0.15572	0.76217	4.38e-36	5.08e-36
NUP210L	5	-0.47996	-11.319	0.074207	0.58924	1.05e-29	4.43e-29	2.1953	53.611	0.23042	0.8383	0	0
CCL17	5	0.23334	5.7601	0.89324	0.99436	8.41e-09	1.51e-08	2.3294	57.856	0.14665	0.74778	0	0
KLHL36	5	0.35502	9.3293	0.60151	0.97061	1.07e-20	3.2e-20	2.2406	58.882	0.19942	0.81636	0	0
CDC42EP5	5	0.27434	6.9234	0.79125	0.98425	4.41e-12	9.24e-12	1.9367	48.422	0.47132	0.93811	0	0
TRIM58	5	0.055334	1.4006	0.67531	0.97613	0.16135	0.18228	2.0754	52.78	0.32885	0.89187	0	0
RIMS2	10	0.23472	7.8813	0.88976	0.99433	3.24e-15	7.81e-15	1.2192	38.815	0.62223	0.97217	0	0
ZNF135	5	0.13341	3.3609	0.85947	0.99054	0.00077694	0.0010611	1.5159	37.29	0.98708	0.99904	2.38e-304	5.47e-304
ZNF621	5	0.11809	2.9798	0.82234	0.98661	0.0028844	0.0037994	1.0502	24.896	0.45744	0.93789	8.13e-137	1.17e-136
LTB	8	0.22499	7.2208	0.91439	0.99473	5.17e-13	1.13e-12	1.5222	47.737	0.99571	0.99929	0	0
CDCP1	5	0.59306	14.395	0.2052	0.81677	5.6e-47	4.06e-46	1.1973	27.651	0.59878	0.96572	2.7e-168	4.18e-168
TRAF3	5	-0.23477	-5.4912	0.21992	0.82927	3.99e-08	6.94e-08	1.0819	24.122	0.48596	0.94107	1.46e-128	2.06e-128
TESK1	5	0.21591	5.559	0.93705	0.99473	2.71e-08	4.76e-08	2.1345	55.016	0.27668	0.86718	0	0
C14orf1	5	-0.33465	-6.852	0.14174	0.73967	7.28e-12	1.51e-11	0.28046	4.8853	0.090077	0.63656	1.03e-06	1.09e-06
NEK11	5	0.15916	3.8847	0.92206	0.99473	0.00010245	0.00014858	0.35682	7.8311	0.10741	0.67954	4.84e-15	5.31e-15
LRRC25	5	-0.20831	-5.0878	0.24634	0.85711	3.62e-07	6.01e-07	1.7481	42.792	0.70292	0.98041	0	0
UNC80	5	0.011279	0.28484	0.58069	0.96636	0.77577	0.79407	1.1112	27.033	0.5126	0.94837	6.06e-161	9.23e-161
ARHGAP32	5	0.035485	0.92152	0.6315	0.97483	0.35678	0.38562	2.2663	59.356	0.18333	0.79836	0	0
USP49	5	0.37358	9.8367	0.56005	0.96337	7.83e-23	2.54e-22	2.3547	62.125	0.13382	0.73119	0	0
DEXI	5	0.7919	17.124	0.066	0.55927	9.81e-66	1.19e-64	2.4895	53.12	0.080848	0.62191	0	0
SFXN3	5	0.4843	12.584	0.35326	0.91932	2.59e-36	1.36e-35	1.2295	30.323	0.63355	0.97219	5.66e-202	9.6e-202
TTYH2	6	0.25019	6.9736	0.85126	0.98947	3.09e-12	6.52e-12	2.3562	66.149	0.13312	0.73022	0	0
TAS2R3	5	0.56159	14.319	0.24232	0.85321	1.67e-46	1.2e-45	1.8996	47.432	0.51369	0.94861	0	0
YIPF6	5	0.41366	9.6126	0.47876	0.95304	7.08e-22	2.22e-21	1.7574	39.801	0.69064	0.98041	0	0
C20orf78	5	0.57547	14.949	0.22478	0.83154	1.58e-50	1.26e-49	1.5105	38.061	0.98002	0.99835	0	0
INO80B	5	0.41129	9.4518	0.48354	0.95304	3.33e-21	1.02e-20	1.1923	24.544	0.59397	0.9654	4.96e-133	7.09e-133
TFEB	5	0.17651	4.1958	0.96555	0.99767	2.72e-05	4.08e-05	0.59533	12.011	0.18044	0.79355	3.1e-33	3.57e-33
C1orf74	5	0.0015569	0.040315	0.56086	0.96337	0.96784	0.97082	0.87839	21.763	0.32538	0.89056	5.17e-105	6.94e-105
APOL6	5	0.35875	8.9807	0.5934	0.96927	2.69e-19	7.65e-19	1.7424	42.584	0.71044	0.98169	0	0
GARS	5	-0.39219	-7.2832	0.11027	0.67906	3.26e-13	7.19e-13	0.073725	1.1944	0.057538	0.54681	0.2323	0.23589
KLF14	5	0.31594	8.2718	0.69254	0.97759	1.32e-16	3.37e-16	1.6747	43.265	0.80149	0.98659	0	0
PRSS16	5	-0.078647	-1.8445	0.41872	0.93676	0.065109	0.076572	2.5747	63.022	0.057027	0.54504	0	0
RNF222	5	0.33274	8.5299	0.65373	0.97483	1.46e-17	3.89e-17	1.3654	34.179	0.7942	0.98659	4.94e-256	9.75e-256
MTNR1B	5	0.50749	13.257	0.31669	0.89834	4.13e-40	2.46e-39	1.4125	35.712	0.8525	0.99087	2.54e-279	5.39e-279
OPCML	5	0.23341	5.7601	0.89301	0.99436	8.41e-09	1.51e-08	1.539	36.804	0.98224	0.99835	1.57e-296	3.51e-296
GPR162	5	0.32343	8.3124	0.67556	0.97626	9.38e-17	2.41e-16	-0.57231	-11.237	0.018935	0.36706	2.7e-29	3.08e-29
ZNF799	2	-0.14583	-1.9046	0.3197	0.89844	0.056828	0.067211	0.89563	10.765	0.33662	0.89397	5.04e-27	5.73e-27
SEMA6B	5	0.23356	5.7476	0.89278	0.99436	9.05e-09	1.63e-08	1.6051	38.608	0.8943	0.99355	0	0
SEPN1	5	0.10522	2.6295	0.79147	0.98425	0.0085514	0.010866	1.4294	34.754	0.87406	0.99203	1.21e-264	2.46e-264
HBEGF	5	0.11616	2.7972	0.81789	0.98557	0.0051552	0.0066652	1.6934	40.017	0.77642	0.98659	0	0
TM4SF19	5	-0.22014	-4.9931	0.23399	0.84314	5.94e-07	9.76e-07	1.5411	34.681	0.9798	0.99835	1.54e-263	3.11e-263
C19orf57	5	0.63871	15.701	0.16005	0.75978	1.48e-55	1.37e-54	1.079	24.288	0.48326	0.94096	2.64e-130	3.76e-130
RHBDD2	5	0.025295	0.63353	0.61019	0.97222	0.52638	0.55466	1.5455	37.965	0.9735	0.99835	0	0
ARMC4	5	0.27327	6.5008	0.79408	0.98428	7.99e-11	1.58e-10	1.4124	32.175	0.85227	0.99087	3.96e-227	7.21e-227
SFTPD	5	0.02051	0.48807	0.60037	0.9706	0.6255	0.65155	1.6432	38.465	0.8436	0.98989	0	0
RNASE3	5	0.13612	3.0999	0.86611	0.99054	0.0019358	0.0025793	0.62499	12.584	0.19223	0.80997	2.6e-36	3.02e-36
PIP5KL1	5	0.66193	16.831	0.14104	0.73806	1.46e-63	1.67e-62	1.6904	41.568	0.78032	0.98659	0	0
FSTL3	5	0.17497	4.5747	0.96137	0.99767	4.77e-06	7.46e-06	1.2983	33.026	0.71142	0.98169	3.41e-239	6.44e-239
BRD3	5	-0.67853	-16.857	0.03034	0.38834	9.34e-64	1.07e-62	0.12799	2.9504	0.064612	0.57095	0.0031737	0.0032897
KLK15	5	0.25373	6.4345	0.84241	0.98892	1.24e-10	2.43e-10	2.2808	58.065	0.17437	0.78682	0	0
DDX31	5	0.56093	14.468	0.24308	0.8542	1.93e-47	1.42e-46	1.5005	37.207	0.96713	0.99835	5.16e-303	1.18e-302
VCAM1	5	-0.0028296	-0.06536	0.55222	0.96187	0.94789	0.95281	1.8957	43.816	0.51796	0.94861	0	0
FAM193A	5	0.72178	18.741	0.099983	0.65956	2.29e-78	3.73e-77	2.7999	72.993	0.021667	0.38659	0	0
MBOAT1	5	0.54275	11.434	0.26653	0.87162	2.84e-30	1.22e-29	0.81761	15.559	0.28718	0.87289	1.38e-54	1.66e-54
SPARCL1	5	-0.37373	-3.2808	0.11946	0.69789	0.001035	0.0014032	2.9169	26.218	0.012849	0.32546	1.68e-151	2.5e-151
PANX1	5	0.044482	1.1186	0.65074	0.97483	0.26333	0.28971	2.2	55.891	0.22698	0.83666	0	0
HSD17B3	5	0.31162	7.9955	0.70277	0.97763	1.29e-15	3.16e-15	1.943	49.393	0.46383	0.93789	0	0
GRIPAP1	5	0.010624	0.25126	0.57929	0.96636	0.80161	0.81787	2.4475	59.589	0.09513	0.64919	0	0
SURF4	5	-0.17219	-3.9195	0.2876	0.88646	8.87e-05	0.00012929	1.9212	44.074	0.4886	0.94215	0	0
NOL6	5	0.68367	10.909	0.12479	0.70562	1.04e-27	4.08e-27	-0.26262	-2.2964	0.030396	0.42967	0.021655	0.022278
DOK6	5	-0.026816	-0.6411	0.50677	0.95634	0.52146	0.54988	0.74266	16.486	0.24601	0.85233	4.59e-61	5.62e-61
ALDH3A2	5	-0.015616	-0.39506	0.52739	0.95755	0.6928	0.71557	2.3153	59.487	0.1546	0.76009	0	0
SERTAD2	5	0.50684	12.071	0.31766	0.89834	1.5e-33	7.26e-33	2.765	66.811	0.02521	0.40645	0	0
ZSWIM4	5	-0.0051429	-0.12804	0.5474	0.96018	0.89812	0.90759	0.90757	21.128	0.34515	0.89736	4.36e-99	5.77e-99
CXCL14	5	0.32091	8.3515	0.68111	0.97715	6.74e-17	1.74e-16	1.9314	49.94	0.47728	0.94096	0	0
MR1	5	-0.17401	-4.1203	0.28534	0.88609	3.78e-05	5.63e-05	1.9583	47.131	0.44717	0.93683	0	0
DNAAF3	5	0.20708	5.5028	0.95839	0.99692	3.74e-08	6.51e-08	1.6012	42.044	0.89979	0.9945	0	0
AFMID	5	0.37098	9.3184	0.56556	0.96337	1.18e-20	3.54e-20	1.8508	45.749	0.5726	0.9642	0	0
ZPBP	5	0.35172	7.9305	0.60931	0.97221	2.18e-15	5.3e-15	1.7829	38.871	0.65737	0.97766	0	0
NXPE2	5	0.3673	8.8361	0.57389	0.96456	9.91e-19	2.76e-18	0.75607	15.951	0.25331	0.85859	2.83e-57	3.43e-57
SOD2	5	-0.015104	-0.3395	0.52837	0.95771	0.73423	0.75489	1.1908	25.821	0.59238	0.9654	5.12e-147	7.57e-147
MMP16	5	0.55161	12.972	0.25446	0.8623	1.76e-38	9.91e-38	1.4668	32.087	0.92252	0.99583	6.77e-226	1.23e-225
RAVER1	5	0.068056	1.5569	0.70423	0.97763	0.1195	0.13684	0.18854	3.4907	0.073497	0.60337	0.00048174	0.00050235
ASPSCR1	5	0.37043	9.2503	0.56662	0.96337	2.24e-20	6.64e-20	0.96836	22.579	0.39068	0.9167	6.97e-113	9.51e-113
FOXQ1	5	0.03445	0.8996	0.62936	0.97483	0.36833	0.39756	1.6433	42.538	0.84341	0.98983	0	0
TMEM161A	5	-0.074701	-1.8987	0.42518	0.93915	0.057602	0.068081	1.9015	48.453	0.51151	0.94837	0	0
MIA	5	-0.30946	-7.2831	0.15764	0.75675	3.26e-13	7.19e-13	1.3152	30.539	0.73185	0.98209	7.9e-205	1.35e-204
SKAP1	5	-0.097739	-2.328	0.38791	0.92917	0.019913	0.024539	2.2848	55.696	0.17195	0.78543	0	0
ASIP	5	-0.42238	-8.2915	0.096807	0.64859	1.12e-16	2.87e-16	0.24073	3.9938	0.08287	0.62597	6.5e-05	6.82e-05
ENOX1	5	0.13574	3.4889	0.86521	0.99054	0.00048497	0.00067158	2.3798	61.845	0.12238	0.71243	0	0
CSRP3	5	0.59848	15.509	0.19914	0.81291	3.02e-54	2.69e-53	1.4898	37.058	0.95252	0.99728	1.32e-300	3e-300
ZFYVE19	5	0.4414	10.926	0.42589	0.93984	8.64e-28	3.4e-27	0.56306	12.364	0.16817	0.78319	4.09e-35	4.74e-35
SH3KBP1	5	0.35024	8.8322	0.61236	0.97292	1.03e-18	2.86e-18	1.0284	23.807	0.43935	0.93481	2.8e-125	3.93e-125
CCDC42	5	0.28699	7.0665	0.7612	0.98201	1.59e-12	3.39e-12	1.2594	29.65	0.66711	0.9797	3.42e-193	5.67e-193
CCDC159	5	-0.075975	-1.9308	0.42279	0.9382	0.053507	0.063479	1.8784	47.861	0.53911	0.95732	0	0
DOCK11	5	0.014541	0.3414	0.58774	0.96873	0.73281	0.75365	1.5221	34.722	0.9955	0.99929	3.61e-264	7.33e-264
SBK2	5	0.25619	6.6065	0.83596	0.98816	3.94e-11	7.9e-11	2.0425	52.507	0.36056	0.90395	0	0
HIST1H2BE	3	0.42011	4.8912	0.46571	0.95066	1e-06	1.62e-06	2.2612	26.287	0.18656	0.8032	2.69e-152	4.02e-152
STAG1	5	-1.148	-20.477	0.0050086	0.1516	3.45e-93	7.51e-92	1.845	37.569	0.57963	0.9654	0	0
DIO3	5	0.29736	7.568	0.73655	0.97995	3.79e-14	8.73e-14	1.9352	48.764	0.47299	0.93873	0	0
BRD1	5	0.15842	3.6442	0.92015	0.99473	0.00026826	0.00037785	1.7519	39.392	0.69787	0.98041	0	0
SAMD14	5	0.68667	16.444	0.12273	0.70121	9.26e-61	9.89e-60	1.5609	36.475	0.95298	0.9973	2.73e-291	6.01e-291
CCR7	5	0.34933	8.7447	0.61478	0.97329	2.24e-18	6.14e-18	1.2773	30.093	0.68705	0.98041	5.95e-199	1e-198
SLC2A7	5	0.24298	6.3002	0.86885	0.99099	2.97e-10	5.72e-10	1.8248	46.829	0.60418	0.96715	0	0
ALPP	3	0.29122	5.7987	0.75092	0.98124	6.68e-09	1.21e-08	1.7184	33.74	0.74147	0.9839	1.48e-249	2.86e-249
CNPPD1	5	-0.19973	-4.555	0.25577	0.86366	5.24e-06	8.18e-06	1.5315	34.72	0.99223	0.99929	3.96e-264	8.02e-264
DNAI1	5	0.18943	4.8882	0.99791	0.99976	1.02e-06	1.65e-06	1.8567	47.551	0.56516	0.96269	0	0
TSPYL2	5	0.18581	4.8044	0.98845	0.99876	1.55e-06	2.49e-06	2.2849	59.447	0.17193	0.78543	0	0
TBC1D22B	5	0.18688	4.3174	0.99124	0.99876	1.58e-05	2.41e-05	1.367	30.146	0.79591	0.98659	1.23e-199	2.07e-199
KIAA1143	5	0.74559	17.637	0.08669	0.62379	1.29e-69	1.7e-68	1.7143	38.193	0.7475	0.98497	0	0
AOC2	5	-0.33993	-8.1702	0.13845	0.73277	3.08e-16	7.72e-16	2.0438	50.073	0.35931	0.90345	0	0
ADAM8	5	-0.37171	-8.6526	0.12043	0.69801	5.03e-18	1.36e-17	1.7632	41.397	0.68299	0.98041	0	0
CBFA2T2	5	0.39885	10.254	0.5074	0.95634	1.14e-24	3.98e-24	2.7862	72.533	0.022944	0.39321	0	0
RORC	5	0.32475	8.1632	0.67266	0.97606	3.26e-16	8.17e-16	1.636	40.23	0.8533	0.99087	0	0
BEST3	7	-0.13023	-3.5091	0.34093	0.91577	0.00044957	0.0006237	1.9366	52.656	0.4715	0.93815	0	0
MSR1	5	0.39582	10.279	0.51358	0.95738	8.78e-25	3.08e-24	1.3751	34.409	0.80622	0.98659	1.87e-259	3.73e-259
USP10	5	-1.1241	-25.507	0.0054973	0.16019	1.64e-143	7.73e-142	0.87849	20.212	0.32543	0.89056	7.72e-91	1e-90
SYNJ2	5	0.099504	2.4343	0.77831	0.9835	0.014922	0.018581	1.5806	37.803	0.92671	0.99718	0	0
MEFV	5	-0.11896	-2.8979	0.35694	0.91979	0.0037573	0.0049079	1.7418	42.404	0.71129	0.98169	0	0
AMD1	5	-0.3776	-7.1849	0.11746	0.69592	6.73e-13	1.46e-12	1.1941	21.628	0.59559	0.9654	9.74e-104	1.3e-103
PNMA3	5	-0.083267	-2.167	0.41131	0.93549	0.030231	0.036712	1.8034	46.939	0.6313	0.97217	0	0
PLXDC1	5	0.26702	6.7846	0.80885	0.98491	1.16e-11	2.39e-11	1.842	46.315	0.58357	0.9654	0	0
CYB5R1	5	0.24526	6.3511	0.86297	0.99054	2.14e-10	4.14e-10	1.8517	47.499	0.57155	0.9642	0	0
PJA1	5	0.13609	3.2659	0.86609	0.99054	0.0010912	0.0014777	1.7698	41.979	0.67409	0.98041	0	0
SLC20A2	5	0.41427	10.516	0.47744	0.95304	7.3e-26	2.67e-25	1.191	28.443	0.5926	0.9654	5.89e-178	9.38e-178
CTH	5	0.37441	8.688	0.55813	0.96337	3.69e-18	1e-17	1.1496	25.051	0.54958	0.96091	1.69e-138	2.44e-138
PODXL2	5	0.23568	5.9264	0.88721	0.99433	3.1e-09	5.69e-09	1.9576	48.919	0.44789	0.93689	0	0
CKB	5	0.2263	5.8074	0.9111	0.99436	6.34e-09	1.15e-08	1.1878	29.253	0.58909	0.9654	4.14e-188	6.78e-188
LIPG	5	-0.044015	-1.1286	0.4754	0.95202	0.25907	0.28532	2.0359	52.576	0.36755	0.90926	0	0
SEC23IP	5	0.0022825	0.055359	0.56235	0.96337	0.95585	0.96001	2.007	48.949	0.39598	0.9198	0	0
COL9A2	5	-0.53668	-12.847	0.057682	0.52544	8.97e-38	4.95e-37	1.3315	31.852	0.75206	0.98503	1.22e-222	2.19e-222
KRTAP16-1	5	0.33874	8.3698	0.63982	0.97483	5.77e-17	1.5e-16	0.33391	7.0049	0.10153	0.66295	2.47e-12	2.69e-12
CIB2	8	-0.005725	-0.17849	0.54628	0.95988	0.85834	0.87121	0.19861	5.2822	0.074996	0.60674	1.28e-07	1.36e-07
C19orf73	5	0.48815	12.806	0.34699	0.91738	1.53e-37	8.35e-37	1.0972	27.754	0.49971	0.94645	1.56e-169	2.43e-169
KLK13	5	-0.30385	-6.7978	0.16165	0.76269	1.06e-11	2.19e-11	1.0916	23.582	0.49449	0.94405	5.84e-123	8.15e-123
IKBKE	5	0.71952	18.636	0.10144	0.66405	1.64e-77	2.61e-76	1.7092	43.124	0.75492	0.98546	0	0
DNAJC21	5	0.61994	14.715	0.17752	0.78396	5.18e-49	4e-48	0.18799	3.3079	0.073463	0.60337	0.00093993	0.00097806
LCAT	5	0.34777	9.0091	0.6181	0.97362	2.08e-19	5.94e-19	2.2658	58.75	0.18373	0.7986	0	0
C9orf173	5	0.25478	6.4607	0.83955	0.98892	1.04e-10	2.05e-10	1.5067	37.275	0.97529	0.99835	4.17e-304	9.58e-304
MLH1	5	0.14373	3.589	0.8845	0.99431	0.00033189	0.00046427	1.5289	37.315	0.99549	0.99929	9.54e-305	2.2e-304
GPR56	5	0.37463	9.6783	0.55777	0.96337	3.73e-22	1.18e-21	1.4178	35.379	0.85909	0.99099	3.64e-274	7.61e-274
SNX32	5	-0.15535	-3.9393	0.30802	0.89601	8.17e-05	0.00011937	2.1155	54.431	0.2924	0.87617	0	0
CGA	5	0.071436	1.7605	0.71196	0.97773	0.07833	0.091422	1.3671	33.088	0.79605	0.98659	4.37e-240	8.27e-240
TENC1	5	0.021891	0.56053	0.60304	0.97105	0.57512	0.60228	2.0584	53.009	0.34514	0.89736	0	0
TBRG4	5	0.49073	12.373	0.34278	0.91577	3.65e-35	1.87e-34	2.4793	62.69	0.08398	0.62786	0	0
BTN3A2	4	0.17054	3.9564	0.95025	0.99561	7.61e-05	0.00011135	2.3854	55.828	0.11971	0.7052	0	0
RREB1	5	-0.4827	-10.468	0.073341	0.58676	1.21e-25	4.39e-25	0.51826	10.403	0.15266	0.75838	2.39e-25	2.7e-25
C9orf9	5	-0.20789	-5.2177	0.24689	0.85712	1.81e-07	3.05e-07	1.8892	47.78	0.52547	0.95359	0	0
KCNJ16	5	0.23727	5.9092	0.88303	0.99414	3.44e-09	6.3e-09	2.3221	58.325	0.15075	0.7549	0	0
PHF19	13	0.44462	18.002	0.42005	0.93731	1.87e-72	2.65e-71	1.7641	69.513	0.6819	0.98041	0	0
MFSD6L	5	0.30515	7.722	0.7181	0.97959	1.15e-14	2.7e-14	1.5136	37.155	0.98413	0.99842	3.7e-302	8.44e-302
PCDH18	5	0.1874	4.5256	0.99237	0.99878	6.02e-06	9.37e-06	1.1594	25.878	0.5592	0.96212	1.17e-147	1.74e-147
NRCAM	5	-0.12227	-2.7879	0.35226	0.91931	0.0053054	0.0068521	0.9422	19.902	0.36997	0.91003	3.91e-88	5.05e-88
ATG4C	5	-0.46364	-10.273	0.080104	0.60834	9.29e-25	3.25e-24	1.5292	34.258	0.99511	0.99929	3.35e-257	6.64e-257
KIAA1644	5	0.11321	2.9066	0.81136	0.98511	0.0036541	0.004779	1.986	50.969	0.41761	0.92879	0	0
CEPT1	5	1.2663	27.336	0.0040202	0.13432	1.58e-164	9.24e-163	0.31501	4.717	0.097418	0.65527	2.39e-06	2.53e-06
MCIDAS	5	0.63365	15.728	0.16457	0.76764	9.73e-56	9.01e-55	2.1958	53.813	0.23008	0.83811	0	0
ROGDI	5	0.3174	7.121	0.68906	0.97759	1.07e-12	2.3e-12	1.4926	32.211	0.95658	0.99817	1.26e-227	2.29e-227
NUDCD2	5	-0.27369	-6.7718	0.18608	0.79677	1.27e-11	2.61e-11	1.2363	29.823	0.64125	0.9747	1.95e-195	3.25e-195
C18orf63	5	0.04698	1.1594	0.65601	0.97483	0.24629	0.27228	1.5384	37.179	0.98296	0.99835	1.52e-302	3.46e-302
PAX4	5	0.16236	4.2505	0.92975	0.99473	2.13e-05	3.22e-05	1.3068	33.361	0.72149	0.9818	4.99e-244	9.54e-244
BAG5	5	0.049967	1.131	0.66282	0.97571	0.25805	0.28442	1.8018	40.557	0.63332	0.97219	0	0
NKAIN1	5	0.2349	5.8791	0.88929	0.99433	4.12e-09	7.53e-09	2.0863	52.174	0.31827	0.88804	0	0
NXT1	5	0.049638	1.2595	0.66205	0.9756	0.20787	0.23176	2.2767	58.339	0.1768	0.78944	0	0
PAX3	5	0.37281	9.2608	0.56164	0.96337	2.03e-20	6.02e-20	1.7546	42.831	0.69452	0.98041	0	0
CCNG1	5	0.2635	6.0696	0.81746	0.98557	1.28e-09	2.4e-09	0.22856	3.92	0.080593	0.62157	8.85e-05	9.28e-05
GCAT	5	0.36155	9.1789	0.58694	0.96843	4.35e-20	1.28e-19	1.7717	44.197	0.67122	0.98041	0	0
AGR2	5	0.22608	5.068	0.91167	0.99436	4.02e-07	6.66e-07	2.0036	44.671	0.39957	0.9223	0	0
RIPPLY2	5	0.21538	5.4058	0.93835	0.99473	6.45e-08	1.11e-07	1.7279	42.937	0.72871	0.9818	0	0
CDKN2A	10	-0.47702	-15.819	0.07544	0.5925	2.32e-56	2.19e-55	0.9289	30.219	0.36048	0.90395	1.34e-200	2.27e-200
FGF6	5	0.32975	8.0294	0.66036	0.9756	9.79e-16	2.41e-15	1.9486	47.141	0.45792	0.93789	0	0
MED11	5	0.094603	1.2718	0.76664	0.98318	0.20343	0.22707	-1.1053	-5.0646	0.009995	0.31034	4.09e-07	4.35e-07
CDKL2	5	0.49177	12.109	0.34121	0.91577	9.48e-34	4.61e-33	2.0346	49.278	0.36884	0.9096	0	0
TMEM218	5	0.079323	2.0581	0.72959	0.97966	0.039583	0.047498	1.9172	49.669	0.49328	0.944	0	0
SPINK2	9	0.052573	1.5158	0.66873	0.97606	0.12957	0.14786	1.931	55.665	0.47786	0.94096	0	0
CRYBA1	5	0.085362	2.081	0.74418	0.98069	0.03743	0.045032	0.86855	19.184	0.3192	0.88847	5.05e-82	6.45e-82
PCMT1	5	-0.19815	-4.9361	0.25756	0.86434	7.97e-07	1.3e-06	2.1607	54.908	0.25568	0.85907	0	0
ITGA7	5	0.39902	9.8229	0.5071	0.95634	8.97e-23	2.91e-22	1.1378	26.359	0.53821	0.95732	4.03e-153	6.03e-153
PPP1R16A	5	-0.32256	-7.9665	0.14938	0.7488	1.63e-15	3.98e-15	2.1928	55.49	0.23261	0.84082	0	0
CAST	5	-0.015486	-0.34953	0.52763	0.95755	0.72669	0.74783	1.6611	37.146	0.81911	0.98804	5.04e-302	1.15e-301
ZNF76	5	0.21613	5.1128	0.93653	0.99473	3.17e-07	5.28e-07	2.6052	62.582	0.050319	0.52051	0	0
FBLIM1	5	-0.066678	-1.5015	0.43813	0.94152	0.13322	0.1518	1.3916	30.536	0.82628	0.98863	8.63e-205	1.47e-204
HEY2	5	0.054558	1.3962	0.6736	0.97606	0.16265	0.18368	1.4185	35.608	0.85999	0.9914	1.07e-277	2.26e-277
AMIGO1	5	0.29427	7.5303	0.74376	0.98069	5.06e-14	1.16e-13	2.3169	59.486	0.15378	0.75916	0	0
MAGI2	5	0.16234	4.0919	0.92974	0.99473	4.28e-05	6.36e-05	2.7038	69.264	0.033017	0.44307	0	0
WISP2	5	0.1618	3.7642	0.92838	0.99473	0.00016712	0.00023907	2.0408	47.474	0.36241	0.90565	0	0
SPTBN5	5	-0.062694	-1.6338	0.44476	0.94278	0.1023	0.11792	2.4409	64.546	0.097784	0.65599	0	0
ZNF605	5	-0.73138	-14.468	0.024066	0.34013	1.92e-47	1.41e-46	2.0889	45.442	0.3161	0.88775	0	0
SLC2A11	5	0.15918	3.7512	0.92208	0.99473	0.00017597	0.00025128	0.85679	18.629	0.31154	0.88621	1.86e-77	2.36e-77
GNPTG	5	-0.016026	-0.40882	0.52656	0.95755	0.68267	0.70587	1.4471	36.164	0.89686	0.99413	2.28e-286	4.93e-286
GPHN	5	0.29116	6.9602	0.75106	0.98124	3.4e-12	7.15e-12	1.9706	46.569	0.43366	0.93347	0	0
RTP4	5	0.37408	9.7667	0.55895	0.96337	1.56e-22	5.03e-22	2.0432	53.048	0.35988	0.90361	0	0
MINK1	5	-0.13276	-3.2906	0.33756	0.91375	0.00099985	0.0013573	1.0791	25.86	0.4833	0.94096	1.89e-147	2.8e-147
PLP2	5	0.8484	19.793	0.046621	0.48308	3.45e-87	6.69e-86	1.7328	37.911	0.72237	0.9818	0	0
OAZ2	5	0.19074	4.5888	0.99881	0.99976	4.46e-06	6.99e-06	1.2502	28.536	0.65685	0.97766	4.17e-179	6.67e-179
SGCE	5	0.36029	8.8181	0.58972	0.96908	1.16e-18	3.23e-18	1.6825	39.785	0.79116	0.98659	0	0
TREM2	5	0.64565	16.59	0.15431	0.75468	8.17e-62	9.02e-61	1.3192	32.016	0.73673	0.98302	6.53e-225	1.18e-224
TCP11	5	0.5681	13.591	0.23421	0.8433	4.5e-42	2.85e-41	1.9353	45.052	0.47293	0.93873	0	0
PLCH2	5	0.43192	11.565	0.44342	0.9426	6.22e-31	2.74e-30	2.469	66.25	0.087279	0.63138	0	0
HOXC6	5	0.045032	1.0858	0.65193	0.97483	0.27755	0.30452	-0.27786	-5.2257	0.02973	0.42641	1.74e-07	1.85e-07
CLDN24	2	-0.19202	-2.9525	0.26453	0.87039	0.0031525	0.0041404	2.2397	35.437	0.19993	0.8164	4.52e-275	9.48e-275
GYS2	5	-0.02366	-0.56233	0.51227	0.95709	0.57389	0.60116	0.85531	18.736	0.31062	0.88541	2.51e-78	3.19e-78
CST9L	5	0.64271	16.532	0.15658	0.75675	2.16e-61	2.35e-60	0.68771	15.779	0.21874	0.83158	4.32e-56	5.23e-56
ENDOG	5	0.31389	8.1576	0.69698	0.97759	3.42e-16	8.55e-16	1.6658	42.552	0.81306	0.98659	0	0
IL20	5	-0.048665	-1.1722	0.46761	0.95069	0.24111	0.26683	1.8618	44.928	0.55889	0.96212	0	0
GPR148	5	0.1432	3.6718	0.88303	0.99414	0.00024081	0.00034077	1.6324	41.246	0.85786	0.99087	0	0
EIF3M	5	-0.79242	-12.724	0.018457	0.29573	4.37e-37	2.35e-36	2.2239	41.208	0.21044	0.82382	0	0
MYH7B	5	0.40379	10.449	0.49775	0.95441	1.47e-25	5.33e-25	1.0493	25.543	0.45683	0.93789	6.62e-144	9.7e-144
MGST3	5	0.14276	3.6894	0.88176	0.99409	0.00022476	0.0003186	1.3934	35.05	0.82851	0.98873	3.88e-269	7.99e-269
COL6A1	5	0.37263	9.6143	0.5621	0.96337	6.96e-22	2.18e-21	1.8448	46.901	0.57999	0.9654	0	0
ARHGAP22	5	0.24932	6.6097	0.8533	0.99005	3.85e-11	7.73e-11	1.8283	48.124	0.6001	0.96572	0	0
ST8SIA5	5	-0.016462	-0.33747	0.5257	0.95755	0.73576	0.75634	0.023312	0.40419	0.052352	0.53026	0.68607	0.68917
AMH	5	0.578	13.327	0.22168	0.83121	1.62e-40	9.74e-40	2.7342	63.303	0.029074	0.42344	0	0
KAT5	5	-0.52636	-9.8439	0.060248	0.53846	7.28e-23	2.37e-22	1.3554	25.348	0.78164	0.98659	9.4e-142	1.37e-141
HCRTR1	5	0.31095	7.9138	0.70443	0.97763	2.5e-15	6.05e-15	0.99892	23.865	0.41476	0.92704	7.15e-126	1e-125
POU3F4	5	0.53762	12.831	0.27374	0.87767	1.09e-37	6.01e-37	2.0812	49.176	0.32326	0.89056	0	0
RPUSD1	5	0.10647	2.7114	0.79439	0.98428	0.0067009	0.0085879	1.8833	47.779	0.533	0.95506	0	0
XPR1	5	0.44315	10.64	0.42281	0.9382	1.95e-26	7.3e-26	1.1396	25.019	0.54005	0.95732	3.84e-138	5.55e-138
REV1	5	-1.264	-25.579	0.0036426	0.12738	2.62e-144	1.25e-142	0.63484	12.882	0.19641	0.81365	5.71e-38	6.66e-38
KIF3A	5	0.062676	1.3943	0.69214	0.97759	0.16322	0.18427	2.4757	56.551	0.085046	0.63033	0	0
GTF2IRD2	3	-0.021919	-0.38787	0.51565	0.95738	0.69811	0.72073	1.2187	20.507	0.62179	0.97217	1.88e-93	2.46e-93
MBNL3	5	0.23696	5.8429	0.8838	0.99414	5.13e-09	9.32e-09	1.3405	31.921	0.76282	0.98569	1.37e-223	2.47e-223
KRTAP23-1	3	0.50815	9.5308	0.31553	0.89752	1.56e-21	4.84e-21	1.5962	28.595	0.90599	0.99482	7.72e-180	1.24e-179
PAGE1	5	0.10076	2.4497	0.78133	0.9835	0.014296	0.017825	2.2776	56.192	0.17622	0.78892	0	0
BTN1A1	5	0.272	6.9731	0.79727	0.98428	3.1e-12	6.54e-12	1.9545	49.741	0.45115	0.93702	0	0
ADAMTSL1	5	0.27938	6.9906	0.77912	0.9835	2.74e-12	5.8e-12	1.743	42.913	0.70966	0.98166	0	0
PEX11A	5	0.252	6.0013	0.84657	0.98892	1.96e-09	3.63e-09	1.5868	36.498	0.91851	0.99573	1.18e-291	2.59e-291
PTPRN2	5	-0.10227	-2.5549	0.38113	0.92608	0.010623	0.013384	1.0551	25.063	0.46176	0.93789	1.27e-138	1.84e-138
SLC5A11	5	0.062155	1.5203	0.691	0.97759	0.12843	0.14663	1.6008	38.498	0.90044	0.9945	0	0
KANSL1	5	0.87819	16.811	0.038614	0.44209	2.03e-63	2.32e-62	1.3724	23.021	0.8028	0.98659	2.9e-117	3.99e-117
ACPT	5	0.32769	8.6427	0.66517	0.97606	5.49e-18	1.48e-17	2.0408	53.633	0.36241	0.90565	0	0
PDE1A	5	-0.12499	-2.6602	0.3484	0.91919	0.0078096	0.0099535	0.91865	18.58	0.35283	0.90122	4.71e-77	5.96e-77
CCNYL1	5	0.015159	0.22868	0.58904	0.96908	0.81912	0.83422	1.8478	27.749	0.57603	0.96488	1.77e-169	2.76e-169
LMTK3	5	0.06541	1.6777	0.69832	0.97759	0.093409	0.10812	1.9046	48.78	0.50811	0.94814	0	0
KATNAL2	5	0.36531	9.4484	0.57876	0.96636	3.44e-21	1.05e-20	0.86385	20.795	0.31624	0.88775	4.77e-96	6.27e-96
MAFB	5	0.18295	4.4736	0.9814	0.99869	7.69e-06	1.19e-05	1.8149	44.068	0.6169	0.9707	0	0
AP2A1	5	-0.32551	-8.475	0.14753	0.74587	2.35e-17	6.19e-17	1.2562	32.378	0.66327	0.979	5.67e-230	1.04e-229
TNFRSF4	5	0.24198	6.3378	0.8714	0.99151	2.33e-10	4.51e-10	1.5501	39.925	0.96752	0.99835	0	0
PGRMC1	6	0.39965	10.995	0.50576	0.95628	4.03e-28	1.6e-27	2.4918	68.831	0.080071	0.62118	0	0
GGT5	5	0.49889	12.862	0.32996	0.90738	7.39e-38	4.09e-37	1.3715	33.764	0.80161	0.98659	6.77e-250	1.31e-249
SIM2	5	0.34284	8.8537	0.63034	0.97483	8.47e-19	2.36e-18	1.3009	32.331	0.71439	0.9818	2.55e-229	4.68e-229
RAE1	5	0.53511	10.156	0.27678	0.87775	3.1e-24	1.06e-23	2.5073	47.873	0.075496	0.60823	0	0
HTRA1	5	0.21941	5.6444	0.92866	0.99473	1.66e-08	2.93e-08	1.5601	39.201	0.95407	0.99767	0	0
PTPN23	5	-0.04598	-0.95226	0.4722	0.95112	0.34097	0.36944	1.7736	36.5	0.669	0.98029	1.09e-291	2.41e-291
CHRNG	5	0.52683	12.68	0.28814	0.88646	7.59e-37	4.06e-36	1.3273	30.343	0.74722	0.98497	3.11e-202	5.27e-202
PNMAL2	5	-0.14606	-3.6324	0.31942	0.89844	0.00028076	0.00039486	1.1765	28.409	0.57702	0.96511	1.55e-177	2.47e-177
AGRN	5	0.079945	2.0797	0.73111	0.97993	0.037549	0.045169	1.7099	44.116	0.75382	0.98503	0	0
SOX15	5	-0.19136	-4.9011	0.26527	0.87111	9.53e-07	1.55e-06	1.6214	41.438	0.87276	0.99203	0	0
DIXDC1	5	0.38854	9.8105	0.52871	0.95771	1.02e-22	3.28e-22	1.9919	49.82	0.41127	0.92704	0	0
APOOL	5	-0.33673	-7.811	0.14037	0.73746	5.67e-15	1.36e-14	1.6237	37.887	0.86964	0.99174	0	0
LCA5	5	-0.001479	-0.033682	0.555	0.96297	0.97313	0.97562	1.3626	30.347	0.79092	0.98659	2.72e-202	4.61e-202
UNC5D	5	0.51353	12.338	0.30741	0.89601	5.67e-35	2.88e-34	0.85189	18.845	0.3084	0.88534	3.22e-79	4.09e-79
COL2A1	5	0.52078	13.736	0.29691	0.89042	6.18e-43	4.01e-42	1.5067	38.68	0.97526	0.99835	0	0
RBM4B	6	0.34071	9.0273	0.63538	0.97483	1.76e-19	5.04e-19	0.076848	1.629	0.057782	0.5474	0.10332	0.10548
MYH2	5	0.29905	7.1593	0.73228	0.97993	8.11e-13	1.76e-12	0.81221	17.416	0.28401	0.8706	6.21e-68	7.71e-68
LYRM9	5	0.55836	12.701	0.24659	0.85712	5.83e-37	3.13e-36	1.188	25.265	0.58941	0.9654	7.8e-141	1.14e-140
C12orf73	5	0.61072	15.516	0.18634	0.79748	2.68e-54	2.39e-53	1.5562	38.333	0.95931	0.99835	0	0
TSPAN11	5	0.19116	4.8022	0.99767	0.99976	1.57e-06	2.52e-06	1.3862	33.68	0.8197	0.98817	1.14e-248	2.21e-248
FAM107A	6	0.39932	11.327	0.50649	0.95634	9.62e-30	4.06e-29	1.9159	53.71	0.49491	0.94425	0	0
SYNDIG1	5	-0.066475	-1.7171	0.43846	0.94159	0.085958	0.099885	2.3173	60.7	0.15352	0.75916	0	0
RNF121	5	-0.29381	-6.8401	0.1693	0.77444	7.91e-12	1.64e-11	1.1029	24.415	0.50488	0.94737	1.18e-131	1.68e-131
ING2	5	-0.23942	-5.3541	0.21527	0.82548	8.6e-08	1.47e-07	-0.43776	-7.6343	0.022866	0.39321	2.27e-14	2.49e-14
IFIT1B	5	0.17308	4.292	0.95664	0.99614	1.77e-05	2.69e-05	1.8382	45.193	0.58851	0.9654	0	0
NTN1	5	0.48374	11.476	0.35419	0.91932	1.74e-30	7.54e-30	0.55847	12.013	0.16646	0.77905	3.05e-33	3.52e-33
CTPS2	5	0.30622	7.8488	0.71535	0.97908	4.2e-15	1.01e-14	1.0221	24.477	0.43415	0.93347	2.6e-132	3.71e-132
GFM1	5	-0.45701	-6.7054	0.082403	0.61551	2.01e-11	4.09e-11	2.2881	36.838	0.1699	0.78341	4.53e-297	1.02e-296
C8G	5	0.42448	10.903	0.45748	0.94974	1.11e-27	4.36e-27	0.84131	19.893	0.30204	0.8847	4.69e-88	6.07e-88
PHKG2	5	0.61124	15.509	0.18575	0.79624	3e-54	2.67e-53	1.7276	42.338	0.72904	0.9818	0	0
TM7SF2	5	0.58878	14.998	0.20964	0.82025	7.54e-51	6.07e-50	1.2313	29.411	0.6356	0.97285	3.94e-190	6.49e-190
RLIM	5	-0.22373	-5.2156	0.2304	0.83797	1.83e-07	3.09e-07	0.81332	17.835	0.2847	0.87159	3.79e-71	4.73e-71
B4GALNT3	5	0.32968	8.4682	0.6605	0.9756	2.49e-17	6.56e-17	1.1664	28.367	0.56635	0.96316	5.1e-177	8.11e-177
NR4A3	5	0.060408	1.4187	0.68686	0.97759	0.156	0.17655	1.6478	38.324	0.83745	0.98873	0	0
ZNF100	5	0.46682	11.276	0.38188	0.92608	1.73e-29	7.24e-29	1.5112	34.585	0.98098	0.99835	4.26e-262	8.58e-262
KLK3	6	0.34004	9.2064	0.63686	0.97483	3.37e-20	9.93e-20	2.2724	61.615	0.17952	0.7926	0	0
PRDM1	5	0.86287	21.686	0.042579	0.46466	2.77e-104	7.4e-103	1.2614	29.856	0.66939	0.98029	7.28e-196	1.22e-195
LGI2	5	0.33796	8.1881	0.6416	0.97483	2.65e-16	6.67e-16	1.7395	40.874	0.71389	0.9818	0	0
NAT2	5	0.49384	11.413	0.33773	0.91397	3.6e-30	1.55e-29	2.7063	63.712	0.032673	0.44241	0	0
GLI2	5	-0.072443	-1.8879	0.4286	0.94019	0.059042	0.069705	1.7124	44.487	0.75041	0.98497	0	0
DPY19L1	5	-0.50165	-10.597	0.067066	0.56125	3.09e-26	1.15e-25	1.9381	42.692	0.46925	0.93789	0	0
SLC2A10	5	-0.37277	-8.8432	0.1199	0.69801	9.3e-19	2.59e-18	1.8957	45.833	0.51796	0.94861	0	0
L3MBTL2	5	0.093553	2.3406	0.76402	0.98259	0.019253	0.023755	2.1766	54.925	0.24426	0.85058	0	0
EML6	5	0.18629	4.4981	0.98981	0.99876	6.86e-06	1.06e-05	1.3743	31.728	0.80523	0.98659	6.42e-221	1.15e-220
CREG2	5	0.20273	5.2216	0.96915	0.99767	1.77e-07	2.99e-07	0.71877	17.218	0.23337	0.8419	1.94e-66	2.41e-66
PKIB	6	0.026572	0.74922	0.61293	0.97329	0.45372	0.48333	1.6271	45.395	0.86502	0.99172	0	0
SAG	5	0.19735	5.1922	0.98221	0.99869	2.08e-07	3.49e-07	2.2016	58.085	0.22604	0.83571	0	0
GUCY2D	5	-0.06597	-1.5012	0.43928	0.94223	0.1333	0.15188	1.541	34.62	0.97984	0.99835	1.27e-262	2.57e-262
CCDC136	5	0.3154	7.7375	0.69353	0.97759	1.01e-14	2.39e-14	1.2713	29.598	0.68047	0.98041	1.59e-192	2.64e-192
ZBED1	5	0.17076	4.3858	0.95071	0.99564	1.16e-05	1.77e-05	1.8068	46.075	0.62689	0.97217	0	0
SFT2D3	5	0.14226	3.5774	0.88065	0.99352	0.000347	0.00048458	1.1108	26.667	0.51216	0.94837	1.15e-156	1.73e-156
CXCL12	11	0.16283	86.815	0.93108	0.99473	0	0	0.62603	335.05	0.19259	0.81037	0	0
MPHOSPH9	5	0.20591	4.4497	0.96149	0.99767	8.6e-06	1.33e-05	1.5875	32.771	0.91766	0.99573	1.51e-235	2.82e-235
BRICD5	5	0.028572	0.709	0.61704	0.97329	0.47832	0.50746	1.8653	46.212	0.55482	0.96162	0	0
ARGFX	5	-0.2864	-6.6735	0.1749	0.77985	2.5e-11	5.06e-11	1.509	34.98	0.97833	0.99835	4.59e-268	9.4e-268
R3HDM2	5	-0.12696	-3.1407	0.34528	0.91673	0.0016852	0.0022545	1.9428	48.535	0.46411	0.93789	0	0
MXD3	5	0.015849	0.39508	0.59047	0.96908	0.69278	0.71557	1.7843	44.232	0.65556	0.97732	0	0
PRKAB1	5	0.609	13.439	0.18785	0.79788	3.56e-41	2.19e-40	0.95796	18.016	0.382	0.91272	1.45e-72	1.81e-72
TBRG1	5	-0.015575	-0.38878	0.52748	0.95755	0.69744	0.72007	1.4067	34.349	0.84568	0.99022	1.46e-258	2.91e-258
CYB5D1	5	0.17209	4.3931	0.95409	0.99566	1.12e-05	1.71e-05	1.8695	47.392	0.55001	0.96113	0	0
FAM98C	5	-0.035271	-0.88676	0.4913	0.95389	0.37521	0.40442	1.2621	30.897	0.6702	0.98041	1.3e-209	2.24e-209
SLC25A44	5	0.069957	1.7172	0.70846	0.97763	0.08595	0.099882	2.1917	54.282	0.23342	0.8419	0	0
GLB1L3	5	0.45836	10.988	0.3959	0.93346	4.36e-28	1.73e-27	1.6167	37.468	0.87908	0.99277	3.11e-307	7.22e-307
PCYT1B	5	0.37774	9.651	0.55131	0.96172	4.87e-22	1.53e-21	2.1549	54.846	0.26027	0.85952	0	0
KIAA0895	5	0.22447	5.3555	0.91572	0.99473	8.53e-08	1.46e-07	1.8365	43.205	0.5903	0.9654	0	0
NR1D1	5	0.50663	12.659	0.31804	0.89834	1e-36	5.33e-36	1.1843	28.042	0.58532	0.9654	5.03e-173	7.91e-173
FFAR3	5	-0.4287	-10.528	0.093897	0.64248	6.44e-26	2.37e-25	1.2208	29.557	0.62393	0.97217	5.35e-192	8.86e-192
CALM1	5	0.10429	2.4431	0.78937	0.98425	0.01456	0.018142	1.1087	24.066	0.5102	0.94814	5.65e-128	7.97e-128
CRB2	5	0.053239	1.3585	0.6703	0.97606	0.1743	0.19633	1.8969	48.338	0.51666	0.94861	0	0
CLDN23	5	-0.13416	-3.4152	0.33544	0.91245	0.00063724	0.00087563	1.4861	37.556	0.94748	0.99718	0	2.67e-308
KRT4	5	0.23415	5.3256	0.89112	0.99433	1.01e-07	1.72e-07	1.6666	37.125	0.81197	0.98659	1.11e-301	2.54e-301
FBLN5	5	-0.0020159	-0.0501	0.55386	0.96204	0.96004	0.96374	1.3762	33.419	0.80752	0.98659	7.14e-245	1.37e-244
NPW	5	0.32211	8.3299	0.67853	0.97654	8.09e-17	2.09e-16	1.4209	35.797	0.86299	0.99172	1.24e-280	2.64e-280
AP3B2	5	0.13409	3.4235	0.86127	0.99054	0.00061825	0.00085025	2.3782	61.276	0.12313	0.71319	0	0
TDO2	5	-0.044753	-0.85128	0.47427	0.95186	0.39462	0.4239	-1.2992	-12.775	0.0083292	0.30654	2.27e-37	2.64e-37
SLC35D1	5	0.43032	10.241	0.44615	0.94338	1.29e-24	4.5e-24	1.4139	31.542	0.85401	0.99087	2.29e-218	4.06e-218
PIWIL4	5	0.11412	2.7472	0.81344	0.98511	0.0060111	0.0077319	1.1868	27.216	0.58805	0.9654	4.24e-163	6.49e-163
ITIH6	5	-0.2291	-5.7615	0.22538	0.83171	8.34e-09	1.5e-08	1.5753	39.488	0.93339	0.99718	0	0
FBXO10	5	0.13829	3.3313	0.87143	0.99151	0.00086452	0.0011776	1.4631	34.455	0.91795	0.99573	3.83e-260	7.66e-260
CALY	5	0.3971	10.081	0.511	0.95698	6.73e-24	2.28e-23	0.4795	10.979	0.14041	0.74033	4.82e-28	5.49e-28
PPP2R5B	5	0.47082	12.21	0.37521	0.92552	2.74e-34	1.36e-33	1.598	40.256	0.90406	0.99472	0	0
FERMT1	5	0.15588	3.9388	0.91398	0.99473	8.19e-05	0.00011958	1.6516	40.933	0.83253	0.98873	0	0
TMEM59L	5	0.38472	9.6296	0.53651	0.95851	6e-22	1.89e-21	0.27224	5.8591	0.088522	0.63262	4.65e-09	4.99e-09
TEX9	5	0.58074	11.922	0.21835	0.82888	9.06e-33	4.28e-32	0.8663	15.169	0.31784	0.88795	5.65e-52	6.78e-52
ERGIC1	5	0.3075	7.8381	0.71224	0.9778	4.57e-15	1.1e-14	2.6393	68.045	0.043356	0.49512	0	0
FMNL1	5	0.35733	9.0474	0.59632	0.96949	1.46e-19	4.21e-19	1.764	43.715	0.68211	0.98041	0	0
CNP	5	0.091214	2.3796	0.7585	0.98201	0.017332	0.021469	1.7429	45.117	0.70981	0.98168	0	0
GRP	5	0.82988	20.453	0.052418	0.50829	5.7e-93	1.24e-91	2.0882	50.167	0.3168	0.88795	0	0
FAM174A	5	-0.25267	-6.4127	0.20402	0.81656	1.43e-10	2.79e-10	2.2262	57.331	0.20908	0.8225	0	0
TRIM63	5	0.22751	5.9753	0.90796	0.99436	2.3e-09	4.25e-09	1.9828	51.932	0.4209	0.92945	0	0
HCRT	5	0.44458	11.593	0.42013	0.93731	4.47e-31	1.98e-30	2.2379	58.227	0.20118	0.81654	0	0
NUBP2	5	-0.3514	-5.4411	0.13166	0.71907	5.29e-08	9.15e-08	-0.87379	-8.6018	0.012605	0.32255	7.85e-18	8.69e-18
LRRK1	5	-0.189	-4.9207	0.26818	0.8741	8.62e-07	1.4e-06	1.7671	46.101	0.67776	0.98041	0	0
C1orf111	5	-0.077701	-1.9986	0.42019	0.93731	0.045649	0.054551	2.406	62.911	0.11106	0.68749	0	0
LHX1	5	0.38453	9.7961	0.53691	0.95851	1.17e-22	3.78e-22	1.2524	30.261	0.65933	0.97814	3.68e-201	6.24e-201
PSMD10	5	0.50064	12.547	0.32726	0.90526	4.11e-36	2.15e-35	1.9689	48.742	0.43553	0.93347	0	0
LRRC71	5	0.64868	17.087	0.15166	0.7526	1.85e-65	2.22e-64	1.7179	44.21	0.7423	0.9839	0	0
TMEM128	5	-0.17168	-3.5931	0.28814	0.88646	0.00032671	0.00045735	1.7167	35.944	0.74391	0.9839	6.23e-283	1.34e-282
HACE1	5	0.27401	6.436	0.79217	0.98428	1.23e-10	2.41e-10	0.61536	12.297	0.18845	0.80555	9.44e-35	1.09e-34
SEC24C	5	-0.056413	-1.3547	0.45507	0.94896	0.17553	0.19762	0.99568	22.968	0.41212	0.92704	9.84e-117	1.36e-116
CRYGB	5	-0.27892	-6.8975	0.18148	0.79057	5.29e-12	1.11e-11	1.8016	45.037	0.63353	0.97219	0	0
SCARA5	5	-0.019423	-0.48524	0.52015	0.95738	0.62751	0.65334	1.6249	40.401	0.86799	0.99174	0	0
CAPRIN1	5	-3.2211	-72.654	0.00032206	0.081675	0	0	-0.50872	-12.591	0.020612	0.37782	2.36e-36	2.74e-36
PRR19	5	0.61128	15.78	0.18572	0.79624	4.28e-56	4.01e-55	1.5272	38.063	0.99741	0.9994	0	0
TAS2R16	5	0.14053	3.5159	0.87655	0.99286	0.00043828	0.00060839	1.9756	49.326	0.42842	0.93122	0	0
CTIF	5	0.18006	4.6184	0.97406	0.99833	3.87e-06	6.08e-06	2.083	53.468	0.32138	0.89038	0	0
P2RY2	5	0.52465	13.701	0.29123	0.88794	9.95e-43	6.39e-42	1.1249	27.867	0.52569	0.95378	6.74e-171	1.05e-170
ADRA1D	5	0.14489	3.8285	0.88746	0.99433	0.00012893	0.00018573	1.8347	48.241	0.59251	0.9654	0	0
PAX1	5	-0.27747	-6.7089	0.18264	0.79353	1.96e-11	3.99e-11	1.0159	23.496	0.42874	0.93122	4.44e-122	6.19e-122
KCNQ3	5	0.74743	17.586	0.085857	0.6227	3.16e-69	4.14e-68	0.078489	1.4391	0.057993	0.54806	0.15012	0.1529
STON1-GTF2A1L	4	0.24253	5.6971	0.86997	0.99122	1.22e-08	2.17e-08	0.70563	15.464	0.22728	0.83666	6.04e-54	7.28e-54
RMND5B	5	0.095894	2.2722	0.76984	0.9835	0.023073	0.02829	1.8277	42.99	0.60067	0.96572	0	0
DMXL2	5	-0.20121	-4.7343	0.25425	0.8623	2.2e-06	3.5e-06	2.7471	68.082	0.027664	0.41953	0	0
COX7A2L	5	0.3406	8.1865	0.63569	0.97483	2.69e-16	6.75e-16	1.5228	35.285	0.99645	0.99929	9.93e-273	2.06e-272
FAM177B	5	-0.13178	-2.8974	0.33893	0.91476	0.0037622	0.0049136	1.1293	23.345	0.52974	0.95483	1.55e-120	2.16e-120
MRVI1	5	0.22798	5.5826	0.90674	0.99436	2.37e-08	4.17e-08	0.96383	21.569	0.38676	0.91464	3.53e-103	4.72e-103
GULP1	5	-0.87323	-15.41	0.013593	0.255	1.4e-53	1.21e-52	1.1817	21.336	0.58254	0.9654	5.27e-101	7e-101
RAB42	5	-0.0043803	-0.10614	0.54909	0.96099	0.91547	0.923	1.2871	30.154	0.69815	0.98041	9.53e-200	1.61e-199
STARD13	5	0.57201	14.213	0.22929	0.83672	7.63e-46	5.36e-45	1.6105	38.421	0.88761	0.99306	0	0
PCDHA2	5	0.10203	2.1174	0.78422	0.98425	0.034226	0.041356	0.53017	9.1559	0.15679	0.76396	5.39e-20	6.01e-20
ABCA13	5	0.57975	14.594	0.21955	0.82927	3.09e-48	2.33e-47	0.85949	19.271	0.31359	0.88667	9.43e-83	1.21e-82
MCOLN2	5	-0.11636	-2.8756	0.36063	0.92053	0.0040332	0.0052534	1.6775	41.248	0.79779	0.98659	0	0
PTPLAD1	5	0.2421	5.2492	0.87106	0.99151	1.53e-07	2.58e-07	2.4512	54.073	0.093786	0.6454	0	0
ITGB2	5	0.34521	8.9345	0.6248	0.97483	4.09e-19	1.15e-18	2.5412	66.258	0.065634	0.57622	0	0
ZNF563	5	0.12012	2.4134	0.82734	0.98661	0.015806	0.019641	1.6651	32.928	0.81394	0.98659	8.74e-238	1.64e-237
TREX1	5	-0.048931	-1.2479	0.46718	0.95069	0.21207	0.23622	1.5772	39.739	0.93122	0.99718	0	0
FMNL3	5	0.28054	7.1382	0.77656	0.9835	9.46e-13	2.04e-12	1.4922	36.914	0.95602	0.99817	2.79e-298	6.27e-298
SOCS6	5	0.1522	3.8433	0.90516	0.99436	0.00012141	0.00017524	2.1862	55.504	0.23728	0.84592	0	0
CELF5	5	0.24529	6.045	0.8629	0.99054	1.49e-09	2.78e-09	1.3117	30.515	0.72729	0.9818	1.67e-204	2.85e-204
METAP1	5	-0.019977	-0.45495	0.51931	0.95738	0.64915	0.67384	1.2707	28.053	0.67987	0.98041	3.7e-173	5.81e-173
RANBP2	5	-0.4859	-11.862	0.072397	0.58327	1.87e-32	8.72e-32	1.3419	32.626	0.76468	0.98627	1.74e-233	3.24e-233
MYO9A	5	-0.087621	-2.1349	0.4042	0.93503	0.032765	0.039671	1.5504	37.302	0.96711	0.99835	1.51e-304	3.48e-304
GRM8	5	-0.15526	-3.7782	0.30817	0.89601	0.00015799	0.00022637	1.3622	32.424	0.79042	0.98659	1.27e-230	2.33e-230
AGGF1	5	0.15883	3.6874	0.92118	0.99473	0.00022654	0.00032107	1.708	38.539	0.75659	0.98553	0	0
TEX264	5	-0.053025	-1.3286	0.46048	0.94988	0.18397	0.20652	1.3337	32.427	0.7546	0.9854	1.13e-230	2.09e-230
TCEA3	5	0.24897	6.3696	0.85407	0.99005	1.9e-10	3.68e-10	2.1001	53.667	0.30589	0.88534	0	0
PKD2	5	-0.013468	-0.31954	0.5315	0.95845	0.74932	0.76909	1.7878	42.242	0.65107	0.97693	0	0
USP4	5	0.11248	2.7618	0.80947	0.98511	0.0057489	0.0074063	0.8899	20.139	0.33304	0.89371	3.36e-90	4.36e-90
MORC4	5	-0.35131	-8.2825	0.13171	0.71907	1.21e-16	3.09e-16	1.6247	38.497	0.86829	0.99174	0	0
USP33	5	-0.016733	-0.35978	0.52519	0.95755	0.71901	0.74035	0.76778	14.41	0.25985	0.85952	4.45e-47	5.27e-47
YIPF2	5	0.34504	8.7547	0.62527	0.97483	2.05e-18	5.63e-18	1.5498	38.057	0.96783	0.99835	0	0
TRPT1	5	0.045628	1.1496	0.6531	0.97483	0.25029	0.27646	1.3115	32.078	0.72716	0.9818	8.85e-226	1.6e-225
TMEM74B	5	0.4198	10.915	0.46614	0.95066	9.77e-28	3.83e-27	0.56901	13.48	0.17034	0.78341	2.05e-41	2.41e-41
RAP1GAP2	5	0.12681	3.1635	0.84416	0.98892	0.0015588	0.0020907	1.1597	27.841	0.55949	0.96212	1.39e-170	2.17e-170
DECR1	5	0.13579	3.3859	0.86538	0.99054	0.00070937	0.00097186	1.3873	33.494	0.821	0.98817	5.92e-246	1.14e-245
CMTR1	5	-0.78449	-10.377	0.019157	0.30026	3.14e-25	1.12e-24	0.7257	8.9194	0.23718	0.84592	4.69e-19	5.21e-19
NARF	5	0.4205	10.005	0.46497	0.95066	1.46e-23	4.86e-23	2.2265	52.77	0.20883	0.8225	0	0
RORA	5	0.39497	9.4206	0.5152	0.95738	4.48e-21	1.37e-20	1.2636	28.442	0.67184	0.98041	6.19e-178	9.86e-178
GLIS3	5	-0.30329	-7.5495	0.16211	0.76345	4.37e-14	1e-13	2.1835	55.605	0.23922	0.8474	0	0
SPATS2	5	0.085239	2.2007	0.74382	0.98069	0.027754	0.033792	1.572	39.966	0.938	0.99718	0	0
OSM	5	-0.088064	-2.2864	0.40352	0.93494	0.022229	0.027287	1.9163	49.925	0.49441	0.944	0	0
WSCD1	5	0.10338	2.6668	0.78742	0.98425	0.0076572	0.0097696	1.6255	41.336	0.86728	0.99172	0	0
ALDH4A1	5	0.47477	11.587	0.36882	0.92344	4.81e-31	2.13e-30	1.696	39.821	0.77298	0.98659	0	0
CACNG2	5	0.28079	6.9	0.77585	0.9835	5.2e-12	1.09e-11	1.602	37.931	0.89892	0.99443	0	0
BTC	5	-0.37451	-7.5761	0.11901	0.69789	3.56e-14	8.22e-14	0.45594	8.075	0.1338	0.73119	6.75e-16	7.43e-16
NXN	5	0.42241	10.716	0.46137	0.95034	8.6e-27	3.27e-26	1.6058	39.418	0.89351	0.99341	0	0
CRTAM	5	0.33538	8.3994	0.64754	0.97483	4.49e-17	1.17e-16	1.6388	39.852	0.8494	0.99084	0	0
MIEF2	5	0.11325	2.9266	0.81138	0.98511	0.0034267	0.0044914	1.2252	30.539	0.62887	0.97217	7.86e-205	1.34e-204
SLC5A4	5	0.27542	6.9954	0.78874	0.98425	2.65e-12	5.61e-12	2.0417	51.628	0.36147	0.90454	0	0
MRAP2	5	0.40181	9.2527	0.50179	0.95502	2.19e-20	6.49e-20	0.2263	3.9256	0.080127	0.62118	8.65e-05	9.07e-05
KRTAP21-2	5	-0.17238	-3.8743	0.28737	0.88646	0.00010693	0.00015492	1.7345	39.046	0.7203	0.9818	0	0
EFHB	5	-0.53708	-11.086	0.057582	0.525	1.47e-28	5.93e-28	1.0299	20.568	0.4405	0.9349	5.35e-94	7.01e-94
CTCFL	12	0.12257	4.8514	0.83348	0.98745	1.23e-06	1.98e-06	1.3768	53.167	0.80825	0.98659	0	0
OSBPL7	5	0.35465	9.1137	0.60244	0.97088	7.96e-20	2.31e-19	1.0299	24.91	0.4405	0.9349	5.86e-137	8.45e-137
HMGN3	6	0.31005	7.496	0.70654	0.97763	6.58e-14	1.5e-13	0.52612	10.459	0.1555	0.76192	1.33e-25	1.51e-25
CREM	26	-0.032077	-1.7428	0.4973	0.95441	0.081374	0.0948	1.3534	71.563	0.77908	0.98659	0	0
CSTF2	5	1.2306	27.94	0.0048198	0.14838	8.74e-172	5.35e-170	1.5723	33.499	0.93769	0.99718	4.97e-246	9.56e-246
MID1IP1	5	0.29328	7.5863	0.74625	0.98069	3.29e-14	7.6e-14	2.3963	62.355	0.11501	0.69491	0	0
ITLN1	5	0.15147	3.8152	0.90353	0.99436	0.0001361	0.00019574	1.6592	41.087	0.8219	0.98817	0	0
WWOX	8	0.30301	9.3881	0.72312	0.97959	6.11e-21	1.85e-20	1.3928	41.383	0.82775	0.98872	0	0
ST5	5	0.097801	2.4876	0.77415	0.9835	0.012861	0.01609	1.9261	48.878	0.48326	0.94096	0	0
SCNN1A	5	0.66909	16.482	0.13537	0.72597	4.91e-61	5.3e-60	2.1569	52.171	0.25865	0.85952	0	0
ARSA	5	-0.08714	-2.217	0.40488	0.9351	0.02662	0.03246	1.3318	33.249	0.75236	0.98503	2.13e-242	4.06e-242
IRS1	5	0.10423	2.1572	0.78926	0.98425	0.03099	0.037602	2.1173	43.963	0.2909	0.87568	0	0
PQLC3	5	0.25518	6.2092	0.8384	0.98858	5.33e-10	1.01e-09	0.66988	14.667	0.21079	0.82418	1.04e-48	1.24e-48
DEF6	5	-0.34302	-8.6524	0.13635	0.72845	5.04e-18	1.36e-17	1.0304	25.322	0.44088	0.9349	1.81e-141	2.65e-141
BHMT2	5	0.024748	0.58011	0.609	0.97221	0.56184	0.58936	0.058871	1.1636	0.055861	0.54134	0.24458	0.24829
HTR5A	5	-0.090812	-2.3294	0.39953	0.93484	0.019836	0.024453	1.5969	40.629	0.90524	0.99482	0	0
TAS2R38	5	0.046969	1.0458	0.65597	0.97483	0.29566	0.32335	0.90381	18.755	0.34242	0.89693	1.77e-78	2.25e-78
TRIM3	5	0.13552	3.3902	0.86463	0.99054	0.0006983	0.00095727	1.6121	39.673	0.88558	0.99306	0	0
TGFA	5	-0.15791	-3.3694	0.30478	0.89601	0.00075324	0.0010298	1.2297	25.482	0.63379	0.97219	3.1e-143	4.54e-143
ALDH1L2	5	-0.12929	-3.1083	0.34206	0.91577	0.0018815	0.0025076	0.96841	22.049	0.39073	0.9167	9.76e-108	1.32e-107
SCAF4	5	-2.1206	-39.908	0.00086623	0.081675	0	0	0.1079	2.1427	0.061902	0.56303	0.03214	0.033019
FAM120AOS	4	0.36713	8.5386	0.57434	0.96467	1.36e-17	3.61e-17	1.2859	28.94	0.69686	0.98041	3.79e-184	6.13e-184
NXPH3	5	0.34609	9.099	0.62267	0.97483	9.12e-20	2.64e-19	1.8093	47.031	0.62381	0.97217	0	0
SERPINA5	5	-0.0077664	-0.19329	0.5426	0.95988	0.84673	0.8602	1.8176	45.128	0.61364	0.96957	0	0
HOXA2	5	0.035307	0.88903	0.63118	0.97483	0.37399	0.40327	2.3812	60.808	0.12177	0.7104	0	0
SMAP1	5	0.075393	1.8586	0.72095	0.97959	0.063089	0.074294	1.3385	31.711	0.76041	0.98553	1.08e-220	1.93e-220
RTN2	9	0.34802	11.72	0.61759	0.97346	1.01e-31	4.59e-31	2.0851	69.814	0.31944	0.88847	0	0
C17orf62	5	0.33139	8.6572	0.6567	0.97483	4.83e-18	1.31e-17	1.1783	29.462	0.57901	0.9654	8.93e-191	1.48e-190
ZBTB43	5	0.15502	3.8752	0.91209	0.99442	0.00010653	0.00015436	1.6328	40.18	0.85747	0.99087	0	0
SOX14	5	0.33982	8.8685	0.63723	0.97483	7.42e-19	2.07e-18	0.38909	9.0436	0.11559	0.69627	1.52e-19	1.69e-19
POM121L12	5	0.3317	7.9363	0.65595	0.97483	2.08e-15	5.06e-15	1.2525	28.079	0.6594	0.97814	1.75e-173	2.76e-173
CASP1	13	0.16876	5.6751	0.94583	0.99524	1.39e-08	2.46e-08	0.59078	16.761	0.17873	0.79183	4.67e-63	5.74e-63
LRCH3	5	0.13428	3.4499	0.86164	0.99054	0.00056088	0.00077348	1.823	46.493	0.60669	0.96788	0	0
RALGDS	5	0.17696	4.4318	0.96663	0.99767	9.34e-06	1.44e-05	0.88677	20.434	0.33081	0.89278	8.3e-93	1.08e-92
CISD1	1	0.43712	5.059	0.43409	0.941	4.21e-07	6.97e-07	1.1815	12.942	0.58231	0.9654	2.6e-38	3.04e-38
ARL6IP5	5	0.30442	7.2565	0.71977	0.97959	3.97e-13	8.71e-13	0.24377	4.7798	0.083358	0.62628	1.76e-06	1.86e-06
BIK	5	-0.69332	-16.579	0.02853	0.37727	9.88e-62	1.09e-60	1.7752	43.857	0.66706	0.97969	0	0
RASSF7	5	-0.56799	-14.66	0.049886	0.50072	1.17e-48	8.94e-48	2.1078	55.766	0.29928	0.88242	0	0
EMP3	5	-0.15667	-3.8086	0.30634	0.89601	0.00013978	0.00020085	1.396	33.237	0.83171	0.98873	3.15e-242	5.99e-242
ACOT11	5	0.15817	4.0535	0.91965	0.99473	5.05e-05	7.47e-05	1.6121	40.64	0.8856	0.99306	0	0
NADSYN1	5	0.16643	4.2211	0.93991	0.99473	2.43e-05	3.66e-05	1.5733	39.101	0.93637	0.99718	0	0
SSH2	5	-0.70728	-17.058	0.026909	0.36574	3.05e-65	3.65e-64	2.2803	58.068	0.1747	0.78682	0	0
CNTD2	5	0.35516	8.6926	0.60119	0.9706	3.54e-18	9.65e-18	1.2855	30.101	0.69644	0.98041	4.74e-199	7.98e-199
FLOT2	5	-1.0997	-24.954	0.0058193	0.1621	1.94e-137	8.36e-136	2.2283	54.295	0.20765	0.82207	0	0
EFCAB12	5	0.2868	7.5317	0.7616	0.98201	5.01e-14	1.15e-13	2.182	57.317	0.24026	0.84829	0	0
RNF149	5	-0.68674	-15.968	0.029374	0.38223	2.15e-57	2.1e-56	0.0095982	0.19055	0.050641	0.52234	0.84888	0.85091
G6PC3	5	0.21202	5.4543	0.94658	0.99524	4.92e-08	8.51e-08	1.977	50.651	0.42708	0.93034	0	0
CXXC5	5	0.01596	0.41151	0.59076	0.96908	0.6807	0.70396	0.99087	24.522	0.40833	0.92559	8.61e-133	1.23e-132
IL17A	5	0.28322	7.1241	0.77018	0.9835	1.05e-12	2.26e-12	1.6407	40.303	0.84668	0.99025	0	0
POMC	5	0.38159	9.8559	0.54308	0.95988	6.46e-23	2.11e-22	1.3323	33.249	0.75296	0.98503	2.13e-242	4.06e-242
RNF144B	5	0.015621	0.37167	0.58998	0.96908	0.71014	0.73213	1.2771	28.946	0.68679	0.98041	3.15e-184	5.1e-184
NUDT6	8	-0.093233	-2.7318	0.39548	0.93296	0.0062994	0.0080905	1.5587	45.202	0.95609	0.99817	0	0
SLC30A4	5	0.097332	2.1784	0.77305	0.9835	0.029374	0.035705	0.25444	4.979	0.085157	0.63033	6.39e-07	6.78e-07
SAP30L	7	0.1475	4.2596	0.89355	0.99436	2.05e-05	3.1e-05	0.89443	23.999	0.3358	0.89397	2.88e-127	4.06e-127
PXN	5	0.0922	2.1891	0.76093	0.98201	0.02859	0.034779	0.86337	18.381	0.31594	0.88772	1.86e-75	2.35e-75
CHRNA9	5	-0.037362	-0.9039	0.48758	0.95328	0.36605	0.39526	0.95611	21.586	0.38072	0.9126	2.43e-103	3.24e-103
ZNF691	5	0.16555	4.2441	0.93808	0.99473	2.19e-05	3.31e-05	1.6351	41.288	0.85433	0.99087	0	0
CPT1A	5	-0.17709	-4.3733	0.28186	0.88134	1.22e-05	1.87e-05	1.5164	37.136	0.98771	0.99928	7.39e-302	1.68e-301
MAP3K19	5	0.098914	2.5235	0.77697	0.9835	0.011621	0.014586	2.0395	52.131	0.36372	0.90641	0	0
TMEM141	5	0.28623	7.3723	0.76294	0.98201	1.68e-13	3.74e-13	1.1716	28.812	0.57191	0.9642	1.51e-182	2.44e-182
BPIFB3	5	0.29612	7.2774	0.73952	0.98049	3.4e-13	7.5e-13	1.2638	29.176	0.67193	0.98041	3.89e-187	6.37e-187
ASB18	5	0.21113	5.5291	0.94881	0.99561	3.22e-08	5.62e-08	1.174	29.677	0.57437	0.9642	1.51e-193	2.51e-193
THBD	5	-0.030641	-0.77065	0.49977	0.95493	0.44091	0.47057	1.3304	32.593	0.75056	0.98497	5.18e-233	9.6e-233
AGBL5	5	0.27988	7.1356	0.77798	0.9835	9.64e-13	2.08e-12	1.9775	50.159	0.42661	0.93034	0	0
GPT	5	-0.14145	-3.4174	0.32554	0.90415	0.00063223	0.00086882	1.4917	35.571	0.95533	0.99817	3.93e-277	8.3e-277
TBX19	5	0.39553	10.222	0.51417	0.95738	1.58e-24	5.49e-24	1.5505	38.954	0.96698	0.99835	0	0
RGS5	9	0.19681	6.1207	0.9835	0.99876	9.32e-10	1.75e-09	1.4203	41.878	0.8622	0.99172	0	0
ABCB9	5	0.08094	1.99	0.7334	0.97993	0.046589	0.055627	2.1648	53.704	0.25275	0.85851	0	0
KIR3DL3	5	-0.44321	-10.429	0.087423	0.62576	1.83e-25	6.6e-25	1.2106	28.14	0.61345	0.96957	3.15e-174	4.96e-174
PATL2	5	0.31594	7.8714	0.69254	0.97759	3.51e-15	8.43e-15	1.9122	46.975	0.49929	0.94645	0	0
COG4	5	0.57851	11.966	0.22103	0.83022	5.35e-33	2.54e-32	1.7283	33.56	0.7282	0.9818	6.4e-247	1.23e-246
PDE4DIP	22	-0.4899	-21.615	0.070887	0.57791	1.29e-103	3.39e-102	1.2195	52.652	0.62248	0.97217	0	0
MYCN	5	0.054877	1.3971	0.67414	0.97609	0.16239	0.18342	1.4588	36.346	0.91217	0.99519	3.07e-289	6.72e-289
LRRC48	5	0.45181	11.505	0.40741	0.9351	1.24e-30	5.42e-30	0.92826	22.067	0.35991	0.90361	6.5e-108	8.77e-108
HDDC3	5	0.19036	4.8962	0.99986	0.99996	9.77e-07	1.58e-06	1.8169	46.35	0.61434	0.9697	0	0
LAMC2	5	0.17517	4.1973	0.96185	0.99767	2.7e-05	4.06e-05	0.87976	19.825	0.32621	0.89066	1.81e-87	2.33e-87
RLBP1	5	0.45569	11.603	0.40064	0.93484	3.96e-31	1.75e-30	1.0834	25.887	0.48731	0.94153	9.43e-148	1.4e-147
CST7	5	0.059035	1.3494	0.6834	0.97759	0.17722	0.19941	1.8312	41.731	0.59673	0.9654	0	0
DISP2	5	-0.0034996	-0.087386	0.55091	0.96172	0.93037	0.93661	1.5216	37.518	0.99477	0.99929	4.64e-308	1.08e-307
BSG	9	0.53217	17.831	0.2806	0.88006	4.08e-71	5.61e-70	1.2524	39.532	0.65936	0.97814	0	0
RNF114	5	0.10763	2.7606	0.79758	0.98428	0.0057702	0.0074326	1.1702	28.738	0.57034	0.9642	1.26e-181	2.03e-181
ARHGAP25	5	-0.011406	-0.27538	0.53557	0.95851	0.78302	0.8007	1.54	36.649	0.98115	0.99835	4.78e-294	1.06e-293
PWP1	5	0.97927	12.84	0.020423	0.31189	9.84e-38	5.43e-37	1.9889	24.46	0.4145	0.92704	3.98e-132	5.67e-132
TMCO3	5	0.34279	8.3638	0.63044	0.97483	6.07e-17	1.57e-16	1.61	37.848	0.8882	0.99306	0	0
TMEM235	5	0.011482	0.29709	0.58104	0.96636	0.7664	0.78519	1.5234	38.987	0.99727	0.9994	0	0
CHRNE	5	0.43755	11.116	0.43316	0.941	1.05e-28	4.26e-28	2.195	55.533	0.23065	0.83847	0	0
SPATA22	5	0.18722	4.3992	0.99195	0.99876	1.09e-05	1.67e-05	2.4382	58.444	0.098806	0.65971	0	0
DHRSX	3	-0.25724	-4.765	0.20007	0.8135	1.89e-06	3.02e-06	-2.2506	-18.897	0.0027986	0.225	1.2e-79	1.53e-79
BSX	5	0.576	15.026	0.2242	0.83154	4.98e-51	4.02e-50	1.7108	43.581	0.75256	0.98503	0	0
MBOAT7	5	-0.52085	-12.431	0.061647	0.54342	1.78e-35	9.14e-35	1.8279	44.545	0.60049	0.96572	0	0
CEP72	5	0.087156	2.1156	0.7483	0.98105	0.034378	0.041532	0.87143	19.643	0.321	0.88966	6.66e-86	8.58e-86
ANGPTL7	5	0.2054	4.8347	0.96266	0.99767	1.33e-06	2.15e-06	1.0885	23.538	0.49201	0.94343	1.65e-122	2.3e-122
MFSD9	5	0.3171	8.2672	0.68982	0.97759	1.37e-16	3.5e-16	1.8431	47.515	0.58218	0.9654	0	0
LCA5L	5	0.38974	9.3402	0.52627	0.95755	9.62e-21	2.89e-20	0.45945	9.0099	0.13497	0.73235	2.06e-19	2.3e-19
STX1A	5	0.2971	7.734	0.73723	0.97996	1.04e-14	2.46e-14	2.2069	57.48	0.22233	0.83439	0	0
ZC3H12B	5	0.11614	3.0578	0.81785	0.98557	0.00223	0.0029601	1.4708	38.065	0.92778	0.99718	0	0
PIK3R1	5	-0.76313	-14.453	0.021134	0.31481	2.4e-47	1.76e-46	0.48496	8.6022	0.14205	0.74126	7.82e-18	8.65e-18
PPIB	5	-0.013661	-0.33643	0.53115	0.95845	0.73655	0.75702	1.6429	39.873	0.84402	0.98991	0	0
FKBP6	5	0.51166	12.616	0.30997	0.89601	1.72e-36	9.08e-36	1.3036	29.823	0.71782	0.9818	1.98e-195	3.3e-195
GPX6	5	0.23339	5.7836	0.89305	0.99436	7.31e-09	1.32e-08	1.151	26.909	0.55102	0.96153	1.75e-159	2.65e-159
GRIN2C	5	0.28633	7.2664	0.76271	0.98201	3.69e-13	8.12e-13	2.0774	52.527	0.3268	0.89107	0	0
PTCH2	5	0.49463	12.913	0.33649	0.9129	3.78e-38	2.11e-37	1.7425	44.551	0.71031	0.98169	0	0
CRYGD	4	-0.083329	-1.902	0.41118	0.93549	0.057171	0.067594	1.7681	40.303	0.6763	0.98041	0	0
GPR45	5	0.2039	5.1258	0.96651	0.99767	2.96e-07	4.94e-07	1.7087	42.248	0.75553	0.98549	0	0
PAPD4	5	0.041412	0.97895	0.64404	0.97483	0.3276	0.35593	2.2106	53.113	0.21953	0.83185	0	0
SLFNL1	5	0.26114	6.7758	0.82379	0.98661	1.24e-11	2.54e-11	2.0132	52.022	0.39019	0.9167	0	0
ATP1A3	5	0.18321	4.7161	0.982	0.99869	2.4e-06	3.82e-06	2.3415	60.751	0.1405	0.74033	0	0
CD6	5	0.4115	10.609	0.48301	0.95304	2.72e-26	1.01e-25	1.5125	37.868	0.98258	0.99835	0	0
E2F2	5	0.11167	2.8485	0.80755	0.98471	0.0043927	0.0057064	1.2904	32.134	0.70175	0.98041	1.5e-226	2.72e-226
KDM5D	5	0.58182	15.448	0.21707	0.82728	7.79e-54	6.83e-53	1.8741	49.1	0.54453	0.95897	0	0
FAM131B	5	0.079098	2.0247	0.72905	0.97959	0.042897	0.051348	1.4299	35.817	0.87473	0.99203	6.07e-281	1.29e-280
SKOR1	5	0.29825	7.761	0.73444	0.97993	8.42e-15	1.99e-14	2.0434	52.961	0.35973	0.90361	0	0
NPVF	5	0.51441	12.112	0.30609	0.89601	9.13e-34	4.45e-33	1.9549	44.766	0.45061	0.93702	0	0
ECHS1	5	0.71935	17.39	0.10152	0.66425	9.83e-68	1.24e-66	0.67592	13.903	0.21326	0.82629	6.1e-44	7.2e-44
IFI27L1	5	-0.14704	-3.6908	0.3182	0.89834	0.00022356	0.00031697	1.0336	25.06	0.44351	0.93627	1.37e-138	1.98e-138
ATOH1	5	0.076749	1.954	0.72393	0.97959	0.050704	0.060305	1.8059	45.724	0.62815	0.97217	0	0
VTCN1	8	0.065145	1.9212	0.69772	0.97759	0.054704	0.064826	1.7109	49.816	0.75248	0.98503	0	0
VDAC2	5	-0.3694	-7.1969	0.12156	0.6992	6.16e-13	1.34e-12	1.5674	30.733	0.94404	0.99718	2.05e-207	3.53e-207
ATAD2B	5	0.32772	7.876	0.66509	0.97606	3.38e-15	8.14e-15	1.0985	24.361	0.50094	0.94645	4.4e-131	6.26e-131
RRAS	5	-0.12911	-2.9977	0.34231	0.91577	0.0027206	0.003587	2.0994	49.844	0.30657	0.88534	0	0
FERD3L	5	0.48455	12.761	0.35288	0.91931	2.69e-37	1.46e-36	1.8938	49.256	0.51995	0.94929	0	0
CHPF	5	0.01395	0.31645	0.58632	0.96812	0.75166	0.77136	0.97912	21.202	0.39907	0.92209	9.11e-100	1.21e-99
SIAE	5	0.23104	5.9971	0.89929	0.99436	2.01e-09	3.72e-09	2.1624	56.186	0.25446	0.85874	0	0
PROKR1	5	0.107	2.7475	0.79594	0.98428	0.0060051	0.0077253	2.1523	55.497	0.26227	0.85958	0	0
ZNF433	5	0.10851	2.4275	0.80001	0.98428	0.015205	0.018923	-0.70732	-10.062	0.015592	0.342	8.17e-24	9.19e-24
SDF2L1	5	0.15368	3.8433	0.90868	0.99436	0.00012137	0.0001752	1.3336	32.21	0.75426	0.98518	1.29e-227	2.36e-227
C17orf89	5	0.3714	6.8134	0.56457	0.96337	9.53e-12	1.97e-11	2.0623	36.885	0.34131	0.89693	7.94e-298	1.78e-297
AKAP11	5	0.10377	2.5039	0.78832	0.98425	0.012285	0.015387	1.3951	32.579	0.83073	0.98873	8.24e-233	1.53e-232
DENND6A	5	0.053004	40.261	0.66975	0.97606	0	0	0.52148	397.73	0.15378	0.75916	0	0
USP6	5	-0.12137	-3.005	0.35352	0.91932	0.0026562	0.0035052	0.8953	21.033	0.33638	0.89397	3.29e-98	4.35e-98
BZRAP1	5	-0.054183	-1.3243	0.45865	0.94974	0.18542	0.20806	0.82871	18.991	0.29389	0.87676	2.02e-80	2.58e-80
CLIP3	5	-0.19153	-4.2147	0.26503	0.87083	2.5e-05	3.76e-05	1.4431	31.254	0.89174	0.99306	1.96e-214	3.44e-214
UQCC1	5	0.44524	10.754	0.41881	0.93676	5.7e-27	2.18e-26	1.9828	47.056	0.42089	0.92945	0	0
BCAS3	5	-0.08331	-2.0535	0.41123	0.93549	0.040028	0.048008	1.6833	41.206	0.7902	0.98659	0	0
C10orf82	5	0.44213	11.017	0.42464	0.93914	3.16e-28	1.26e-27	2.0317	50.081	0.37151	0.91109	0	0
SF3A1	5	0.27677	3.6634	0.78536	0.98425	0.00024894	0.00035189	0.011429	0.10913	0.05083	0.52309	0.9131	0.91442
HOXC13	5	0.19496	4.9859	0.98796	0.99876	6.17e-07	1.01e-06	2.4123	62.355	0.10847	0.68081	0	0
PTRF	5	0.081308	1.8339	0.7344	0.97993	0.066674	0.078336	1.7382	38.899	0.71559	0.9818	0	0
GBP2	5	0.3983	10.285	0.5085	0.95635	8.19e-25	2.88e-24	2.2395	57.78	0.20009	0.8164	0	0
STK31	5	0.30242	7.3975	0.72454	0.97959	1.39e-13	3.11e-13	1.3582	31.254	0.78529	0.98659	1.94e-214	3.4e-214
GLP2R	5	0.056802	1.4033	0.67863	0.97654	0.16053	0.18143	2.1362	53.182	0.27521	0.8665	0	0
TICAM2	5	0.87751	18.821	0.038758	0.44233	5.11e-79	8.39e-78	-0.6558	-7.067	0.016903	0.35486	1.58e-12	1.72e-12
NPAS2	5	0.35776	8.7901	0.59548	0.96927	1.49e-18	4.13e-18	1.4496	34.298	0.90022	0.9945	8.42e-258	1.67e-257
CA6	5	-0.19185	-4.9953	0.2647	0.87039	5.87e-07	9.65e-07	2.0195	52.993	0.38395	0.91384	0	0
STC2	5	-0.053429	-1.3517	0.45997	0.94974	0.17647	0.19862	1.5272	38.213	0.99736	0.9994	0	0
ZNF547	5	-0.055149	-1.1707	0.45706	0.94974	0.24171	0.26747	2.2825	49.621	0.1735	0.78682	0	0
APBB3	5	-0.012898	-0.32173	0.53251	0.95851	0.74766	0.76743	1.1098	26.407	0.5113	0.94837	1.15e-153	1.72e-153
GATA6	5	0.2868	7.4901	0.7616	0.98201	6.88e-14	1.57e-13	1.7247	44.397	0.73277	0.98209	0	0
ZNF597	5	-0.17877	-4.1547	0.27978	0.88006	3.26e-05	4.87e-05	2.1785	52.084	0.24265	0.84948	0	0
PWWP2B	5	0.19519	5.0122	0.98736	0.99876	5.38e-07	8.86e-07	1.7143	43.498	0.7474	0.98497	0	0
WDR66	5	0.44159	10.287	0.42568	0.93972	8.06e-25	2.83e-24	2.6015	61.274	0.05113	0.52467	0	0
CYP27C1	5	0.281	6.9811	0.77532	0.9835	2.93e-12	6.19e-12	0.81957	18.421	0.28843	0.87345	8.9e-76	1.12e-75
CASP10	5	0.40683	10.23	0.49173	0.95401	1.46e-24	5.08e-24	1.7493	42.84	0.70138	0.98041	0	0
UMODL1	5	0.50614	12.342	0.31883	0.89834	5.36e-35	2.73e-34	2.0793	50.16	0.32503	0.89056	0	0
CCDC178	5	-0.178	-3.9143	0.28074	0.88006	9.07e-05	0.00013198	1.1323	23.262	0.53259	0.95483	1.08e-119	1.5e-119
C9orf135	5	0.02757	0.66597	0.61486	0.97329	0.50543	0.53414	2.3684	58.236	0.12725	0.71905	0	0
SYCE2	5	0.084857	2.1294	0.74287	0.98069	0.033222	0.040211	1.4877	36.509	0.94955	0.99718	8.09e-292	1.79e-291
CTAG1A	3	0.16229	3.0881	0.92961	0.99473	0.0020144	0.0026811	1.718	32.474	0.74194	0.9839	2.48e-231	4.57e-231
EVC2	5	-0.27886	-7.012	0.18154	0.79067	2.35e-12	4.98e-12	1.5128	37.893	0.98292	0.99835	0	0
JAK1	5	0.14449	3.5855	0.88642	0.99433	0.00033638	0.00047026	1.9756	48.914	0.42847	0.93122	0	0
TMEM177	5	0.71023	18.528	0.10708	0.67622	1.23e-76	1.92e-75	1.1531	28.144	0.55278	0.96153	2.83e-174	4.47e-174
CCDC8	5	0.49004	12.366	0.34384	0.91577	3.97e-35	2.03e-34	1.4673	35.746	0.92307	0.99583	7.54e-280	1.6e-279
ZNF394	5	0.38938	9.9701	0.52696	0.95755	2.06e-23	6.84e-23	1.1446	27.767	0.54484	0.95914	1.08e-169	1.69e-169
ZNF7	10	0.012936	0.45437	0.58422	0.96658	0.64957	0.6742	1.8873	66.261	0.52807	0.95483	0	0
SERPINC1	5	0.35027	8.9828	0.61232	0.97292	2.64e-19	7.51e-19	1.7418	43.797	0.71118	0.98169	0	0
STARD3NL	5	0.43573	9.5114	0.43669	0.94128	1.88e-21	5.81e-21	0.091849	1.4877	0.059803	0.55393	0.13684	0.13943
PDXDC1	5	-0.36504	-9.0398	0.12389	0.70465	1.57e-19	4.51e-19	2.0328	51.496	0.37038	0.91029	0	0
MANBAL	4	0.34845	7.8688	0.61675	0.97329	3.58e-15	8.61e-15	1.1092	23.387	0.51069	0.94814	5.75e-121	7.98e-121
CDC37L1	5	0.1199	2.5233	0.82681	0.98661	0.011627	0.014592	0.59665	11.004	0.18094	0.79478	3.68e-28	4.18e-28
SERPINA10	5	0.3141	7.9207	0.69647	0.97759	2.36e-15	5.73e-15	1.0091	23.966	0.42317	0.92994	6.32e-127	8.9e-127
RGS11	5	-0.34447	-8.5514	0.13552	0.72612	1.22e-17	3.24e-17	1.7342	43.488	0.72058	0.9818	0	0
RNF186	5	0.087216	1.9742	0.74846	0.98105	0.048353	0.057634	1.7316	38.894	0.72427	0.9818	0	0
IL1R2	5	-0.14689	-3.7018	0.3184	0.89834	0.00021405	0.00030384	1.6419	41.179	0.84518	0.99022	0	0
ST8SIA2	5	0.42423	9.8445	0.45796	0.94974	7.24e-23	2.36e-22	0.86616	18.532	0.31776	0.88795	1.13e-76	1.43e-76
NUAK2	5	0.2513	5.8523	0.8483	0.9892	4.85e-09	8.82e-09	1.9127	43.948	0.49878	0.94644	0	0
CYP20A1	5	0.19509	4.9104	0.98763	0.99876	9.09e-07	1.48e-06	1.8955	47.37	0.51811	0.94861	0	0
CHRM1	5	0.28028	7.2265	0.77721	0.9835	4.96e-13	1.08e-12	1.6447	41.74	0.84142	0.98944	0	0
DCDC2B	5	0.61009	14.756	0.18688	0.79788	2.81e-49	2.18e-48	2.0531	48.848	0.35038	0.90059	0	0
TRIM15	5	0.34023	8.7106	0.63648	0.97483	3.02e-18	8.25e-18	1.6845	42.259	0.78863	0.98659	0	0
DGKD	5	-0.060317	-1.5522	0.4487	0.94539	0.12062	0.13806	2.3083	60.263	0.15842	0.76714	0	0
CIZ1	5	0.01433	0.36487	0.58727	0.96861	0.7152	0.73676	2.3309	60.077	0.14596	0.74703	0	0
C1orf168	5	0.16118	3.8183	0.92695	0.99473	0.00013436	0.00019329	1.559	35.772	0.95561	0.99817	3.02e-280	6.42e-280
HIST1H4F	5	0.2794	6.3088	0.77904	0.9835	2.81e-10	5.41e-10	0.97568	19.308	0.39629	0.92005	4.64e-83	5.94e-83
SUSD5	5	-0.33294	-7.5192	0.14291	0.74274	5.51e-14	1.26e-13	0.33615	6.4982	0.1021	0.66383	8.13e-11	8.78e-11
TTC7A	5	0.74799	19.505	0.085646	0.62151	9.9e-85	1.83e-83	1.2346	30.63	0.6394	0.97375	4.86e-206	8.33e-206
ARHGAP28	5	-0.38626	-8.9404	0.11332	0.68635	3.88e-19	1.1e-18	2.3317	55.834	0.14554	0.74672	0	0
C9orf64	5	-0.013735	-0.34566	0.531	0.95845	0.7296	0.75061	1.6214	40.392	0.87291	0.99203	0	0
RPGR	5	0.268	6.4045	0.80656	0.98428	1.51e-10	2.95e-10	1.7565	41.281	0.69187	0.98041	0	0
RNF157	5	0.20848	5.3606	0.95501	0.99583	8.3e-08	1.42e-07	2.46	63.936	0.090699	0.63805	0	0
NENF	5	0.2396	6.0186	0.87751	0.99286	1.76e-09	3.27e-09	2.1349	53.648	0.27628	0.86698	0	0
C11orf71	5	0.28377	7.072	0.76884	0.9835	1.53e-12	3.27e-12	2.2527	56.237	0.19159	0.80971	0	0
IGFN1	5	-0.080218	-1.9507	0.41609	0.93607	0.051095	0.060762	1.0158	23.625	0.42864	0.93122	2.12e-123	2.96e-123
VGLL1	5	0.34763	9.0041	0.61851	0.97384	2.18e-19	6.2e-19	1.6507	41.885	0.83379	0.98873	0	0
ATP6V0A4	5	0.38767	9.8883	0.5306	0.95845	4.68e-23	1.53e-22	1.4593	36.365	0.91302	0.99519	1.51e-289	3.29e-289
HMGCS2	5	0.30438	7.7003	0.71981	0.97959	1.36e-14	3.19e-14	1.1054	26.092	0.50695	0.94737	4.54e-150	6.76e-150
ITLN2	5	0.066172	1.6526	0.70006	0.97759	0.098422	0.11371	1.9548	48.832	0.45075	0.93702	0	0
TTC34	5	-0.20886	-4.0623	0.24578	0.85679	4.86e-05	7.2e-05	0.74922	13.59	0.24962	0.85679	4.58e-42	5.39e-42
FKBP5	5	-0.24558	-5.1202	0.20986	0.82051	3.05e-07	5.09e-07	0.90885	16.901	0.34598	0.89768	4.45e-64	5.49e-64
TMEM255B	5	0.26589	6.8238	0.81166	0.98511	8.87e-12	1.84e-11	2.0837	53.358	0.3207	0.88934	0	0
ZNF461	5	0.19705	3.8907	0.98289	0.99869	0.0001	0.0001451	1.4592	26.798	0.91288	0.99519	3.37e-158	5.09e-158
ELF1	5	0.014592	0.33582	0.58781	0.96873	0.737	0.75744	1.8865	43.399	0.52912	0.95483	0	0
TMPRSS9	5	0.43878	11.47	0.43055	0.94022	1.87e-30	8.08e-30	1.5812	40.37	0.92591	0.99694	0	0
RAB19	5	0.2512	6.4469	0.84856	0.9892	1.14e-10	2.24e-10	1.5511	38.945	0.96587	0.99835	0	0
IFT88	5	0.30135	6.864	0.72684	0.97959	6.7e-12	1.39e-11	1.5195	32.719	0.99176	0.99928	8.45e-235	1.57e-234
LRFN5	5	0.035864	0.85327	0.63242	0.97483	0.39351	0.42278	0.83967	17.985	0.30119	0.88426	2.53e-72	3.18e-72
ROBO4	5	0.042866	1.0828	0.64701	0.97483	0.27892	0.30595	2.3443	59.821	0.13905	0.7392	0	0
SNCB	5	0.38184	9.0914	0.54244	0.95988	9.78e-20	2.83e-19	0.96652	20.793	0.38899	0.91531	4.99e-96	6.56e-96
USP17L10	4	-0.091395	-1.8343	0.39836	0.93434	0.066612	0.078274	1.5676	30.856	0.94377	0.99718	4.61e-209	7.97e-209
WARS2	5	0.23683	4.401	0.88408	0.99414	1.08e-05	1.65e-05	1.6592	29.586	0.82203	0.98817	2.26e-192	3.74e-192
TRIM33	5	0.32647	7.5938	0.66848	0.97606	3.11e-14	7.19e-14	2.2998	53.781	0.1632	0.77448	0	0
CES5A	5	0.22669	5.88	0.91009	0.99436	4.1e-09	7.49e-09	1.4493	36.598	0.89987	0.9945	3.11e-293	6.89e-293
CBX2	5	-0.025397	-0.64544	0.50931	0.95635	0.51864	0.54704	1.9085	48.599	0.50363	0.9472	0	0
C1RL	5	0.099116	2.5919	0.77746	0.9835	0.0095442	0.012078	1.4646	37.661	0.91978	0.99573	2.1459e-310	5.0438e-310
SLFN14	5	0.24016	5.8612	0.87617	0.99286	4.59e-09	8.37e-09	1.8794	45.329	0.5378	0.95724	0	0
FAM178B	10	-0.054245	-1.9078	0.45854	0.94974	0.056421	0.066769	1.7484	61.264	0.70254	0.98041	0	0
RIPPLY1	7	-0.17325	-4.913	0.28631	0.88646	8.97e-07	1.46e-06	1.8244	52.016	0.60482	0.96715	0	0
COQ9	5	-0.075265	-1.8686	0.42413	0.9387	0.061684	0.0727	1.8517	46.08	0.57158	0.9642	0	0
PTX3	5	0.47243	11.99	0.37272	0.92537	3.99e-33	1.91e-32	1.9891	49.94	0.41435	0.92704	0	0
CMTM5	5	0.065303	1.7002	0.69804	0.97759	0.089086	0.10333	2.445	64.404	0.096074	0.65207	0	0
LYNX1	12	-0.10414	-3.9543	0.37851	0.92552	7.68e-05	0.0001123	1.5195	57.01	0.99189	0.99928	0	0
HPN	5	0.10863	2.7636	0.80024	0.98428	0.0057168	0.0073654	1.4798	36.842	0.93911	0.99718	3.88e-297	8.7e-297
HES3	5	-0.084617	-2.1217	0.40903	0.93515	0.03386	0.040939	1.2258	29.891	0.62951	0.97217	2.55e-196	4.27e-196
TTLL6	5	0.42763	9.3855	0.45152	0.94703	6.26e-21	1.9e-20	1.3906	28.597	0.82501	0.98853	7.42e-180	1.19e-179
VAX2	5	0.27051	6.9723	0.80032	0.98428	3.12e-12	6.57e-12	1.8423	46.948	0.58321	0.9654	0	0
TPM4	5	-0.26919	-6.5477	0.18987	0.80225	5.84e-11	1.16e-10	2.4748	62.432	0.085335	0.63043	0	0
LIX1L	5	0.076238	1.7887	0.72286	0.97959	0.073669	0.0862	1.0397	22.517	0.44842	0.93689	2.86e-112	3.89e-112
BBC3	18	0.10016	4.8745	0.77981	0.9835	1.09e-06	1.76e-06	2.1084	102.96	0.29863	0.88225	0	0
PFN3	5	0.31075	7.3803	0.70493	0.97763	1.58e-13	3.53e-13	1.8471	43.406	0.57717	0.96511	0	0
KRT85	5	0.84621	21.725	0.047365	0.48784	1.2e-104	3.23e-103	1.5348	37.519	0.98789	0.99928	4.51e-308	1.05e-307
RBMXL3	5	0.62584	16.248	0.17209	0.77473	2.32e-59	2.39e-58	1.5841	39.807	0.92192	0.99583	0	0
OTUD1	5	0.22458	5.8013	0.91549	0.99473	6.58e-09	1.19e-08	1.9782	50.882	0.42584	0.93034	0	0
CCL26	5	0.15954	4.0259	0.92292	0.99473	5.68e-05	8.38e-05	1.5646	38.875	0.94788	0.99718	0	0
HIST1H4A	5	0.67309	15.58	0.13236	0.72077	9.94e-55	8.95e-54	1.315	28.502	0.73159	0.98209	1.11e-178	1.78e-178
SECTM1	5	0.5897	14.99	0.20866	0.81816	8.56e-51	6.88e-50	1.4862	36.123	0.94766	0.99718	9.89e-286	2.14e-285
CD70	5	0.38467	8.9813	0.53667	0.95851	2.68e-19	7.61e-19	2.0704	47.938	0.33378	0.89397	0	0
C1orf115	5	-0.07943	-1.824	0.41738	0.93653	0.068148	0.08	2.2302	51.952	0.2066	0.82109	0	0
HCN4	5	0.20146	5.2578	0.9721	0.99793	1.46e-07	2.47e-07	1.621	41.706	0.87333	0.99203	0	0
IFI6	5	0.15345	3.8389	0.90817	0.99436	0.00012357	0.00017823	1.6529	40.566	0.83055	0.98873	0	0
NLN	5	-0.01061	-0.26613	0.53685	0.95851	0.79014	0.80708	0.781	18.618	0.26629	0.86089	2.29e-77	2.9e-77
JMJD1C	5	0.55799	14.152	0.24704	0.85712	1.82e-45	1.26e-44	2.4422	61.942	0.097296	0.65527	0	0
DAGLB	5	0.061921	1.5199	0.69049	0.97759	0.12853	0.14673	0.64494	14.561	0.20077	0.81654	4.96e-48	5.9e-48
MYADML2	5	0.25407	6.7338	0.8415	0.98892	1.65e-11	3.38e-11	1.3982	36.301	0.83475	0.98873	1.54e-288	3.37e-288
ARHGDIA	5	0.32508	8.4341	0.67175	0.97606	3.34e-17	8.74e-17	1.4377	36.307	0.88454	0.99306	1.26e-288	2.74e-288
MAGEB1	5	0.049778	1.0864	0.66238	0.9756	0.27729	0.30426	0.305	5.7318	0.095375	0.65006	9.94e-09	1.06e-08
ESRRG	5	0.2063	5.0981	0.96045	0.99762	3.43e-07	5.7e-07	1.9405	47.622	0.46673	0.93789	0	0
HERC1	5	0.26532	6.7055	0.81303	0.98511	2.01e-11	4.08e-11	2.091	52.727	0.31417	0.88667	0	0
CLIC6	5	0.24198	6.1486	0.8714	0.99151	7.82e-10	1.48e-09	2.1955	55.874	0.23033	0.8383	0	0
NT5C1B	5	0.53216	13.294	0.28062	0.88006	2.51e-40	1.51e-39	1.4256	33.821	0.8689	0.99174	9.83e-251	1.91e-250
KRTAP13-3	4	1.0046	22.859	0.017658	0.28935	1.19e-115	3.85e-114	1.2233	25.53	0.62675	0.97217	9.07e-144	1.33e-143
GALM	5	0.23487	5.8147	0.88938	0.99433	6.07e-09	1.1e-08	1.836	44.821	0.591	0.9654	0	0
UGT1A1	5	0.31936	8.0891	0.68457	0.97759	6.01e-16	1.49e-15	1.3849	33.66	0.81802	0.98768	2.21e-248	4.27e-248
RELA	5	0.055621	1.4128	0.676	0.97654	0.15772	0.17836	1.4633	36.414	0.91814	0.99573	2.55e-290	5.6e-290
FOCAD	5	-0.5281	-11.541	0.05987	0.53615	8.18e-31	3.59e-30	1.7674	39.972	0.67725	0.98041	0	0
FBXO21	5	0.23324	5.6887	0.89351	0.99436	1.28e-08	2.28e-08	1.1763	27.163	0.57694	0.96511	1.79e-162	2.74e-162
DVL2	5	0.50933	13.441	0.3138	0.89675	3.47e-41	2.14e-40	1.605	41.417	0.89447	0.99362	0	0
PTCHD3	5	0.22654	5.9233	0.91047	0.99436	3.15e-09	5.79e-09	1.3558	34.606	0.78203	0.98659	2.04e-262	4.11e-262
GLRA4	5	0.1705	4.2216	0.95012	0.99561	2.43e-05	3.65e-05	1.3675	33.135	0.79641	0.98659	9.32e-241	1.77e-240
ZNF726	5	-0.21776	-4.6583	0.23648	0.84625	3.19e-06	5.04e-06	1.3897	29.049	0.82389	0.98817	1.57e-185	2.54e-185
CDRT15L2	5	0.34097	8.6742	0.63467	0.97483	4.16e-18	1.13e-17	2.1887	55.613	0.23562	0.84494	0	0
LOC100507003	5	0.48239	10.506	0.35613	0.91979	8.07e-26	2.95e-25	0.1509	2.6149	0.067688	0.58112	0.0089259	0.0092219
MYADM	5	0.13034	3.2177	0.85243	0.98984	0.0012921	0.0017414	1.5729	37.867	0.93692	0.99718	0	0
C1QB	5	-0.0099996	-0.25064	0.53801	0.95925	0.80209	0.81827	1.5121	37.471	0.98205	0.99835	2.76e-307	6.4e-307
C17orf72	10	-0.18452	-6.4732	0.2732	0.87767	9.59e-11	1.89e-10	1.6413	57.412	0.8459	0.99022	0	0
TEX30	10	0.43018	13.723	0.4465	0.94367	7.4e-43	4.78e-42	1.5049	45.417	0.97281	0.99835	0	0
LEPRE1	5	0.32452	7.5523	0.67304	0.97606	4.28e-14	9.83e-14	1.0738	22.51	0.47843	0.94096	3.35e-112	4.56e-112
C5orf46	4	0.14034	3.1446	0.87616	0.99286	0.001663	0.0022265	1.68	37.277	0.79451	0.98659	3.82e-304	8.78e-304
GRIA3	5	0.37834	9.0932	0.55008	0.96133	9.62e-20	2.78e-19	1.2511	28.301	0.65799	0.97811	3.37e-176	5.34e-176
ACTL8	5	0.49571	12.835	0.33494	0.91245	1.05e-37	5.77e-37	1.6262	41.155	0.86636	0.99172	0	0
COL4A1	5	-0.60785	-14.089	0.041657	0.46138	4.46e-45	3.07e-44	1.3224	30.715	0.74089	0.9839	3.64e-207	6.26e-207
KNCN	5	0.11898	2.7929	0.82453	0.98661	0.005224	0.0067498	1.4108	32.483	0.8505	0.99087	1.87e-231	3.46e-231
CCDC43	5	-0.41196	-9.4764	0.10159	0.66425	2.63e-21	8.08e-21	1.9967	47.422	0.40661	0.92492	0	0
IFIT2	5	0.15003	3.6847	0.90009	0.99436	0.000229	0.00032445	2.1809	53.864	0.24094	0.84897	0	0
ZSCAN31	8	-0.31824	-9.1642	0.15228	0.75401	4.99e-20	1.46e-19	0.91176	24.784	0.3479	0.89915	1.34e-135	1.92e-135
RNASEL	5	0.47047	11.516	0.37567	0.92552	1.09e-30	4.75e-30	1.8797	45.229	0.53742	0.95724	0	0
ALCAM	5	0.07021	1.7515	0.70908	0.97763	0.079868	0.093109	1.658	40.809	0.82391	0.98817	0	0
TBC1D9	5	0.30265	7.1363	0.72392	0.97959	9.59e-13	2.07e-12	1.8724	43.517	0.54656	0.95926	0	0
RRAGA	5	-0.17872	-4.2497	0.27985	0.88006	2.14e-05	3.23e-05	0.63099	13.36	0.19478	0.81341	1.03e-40	1.21e-40
DDX60L	5	0.12556	2.8149	0.84087	0.98892	0.0048792	0.006322	0.79273	16.231	0.27296	0.86515	3.05e-59	3.72e-59
ZDHHC8	5	0.21251	5.422	0.94546	0.99524	5.89e-08	1.02e-07	2.2383	57.395	0.20091	0.81654	0	0
KIAA0586	5	-0.22628	-5.1877	0.22801	0.83493	2.13e-07	3.57e-07	1.1924	26.329	0.59403	0.9654	9.01e-153	1.35e-152
NTRK3	5	0.19959	5.176	0.97663	0.99833	2.27e-07	3.8e-07	1.7433	44.676	0.70932	0.98166	0	0
RASSF2	5	-0.021959	-0.56213	0.51555	0.95738	0.57403	0.6012	1.67	42.445	0.80746	0.98659	0	0
ACOT9	5	0.094406	1.943	0.76617	0.98318	0.052013	0.061792	4.1032	91.525	0.00036648	0.17297	0	0
KBTBD7	5	0.15696	3.9834	0.91671	0.99473	6.79e-05	9.97e-05	2.0249	51.364	0.37859	0.91202	0	0
STX11	5	-0.19696	-5.0294	0.25903	0.86549	4.92e-07	8.12e-07	1.6122	41.07	0.88545	0.99306	0	0
SLK	5	0.07065	1.6244	0.71019	0.97769	0.10428	0.12012	1.1279	24.106	0.52846	0.95483	2.16e-128	3.05e-128
NSG1	5	0.072239	1.7484	0.714	0.97862	0.080397	0.093719	0.79047	17.777	0.27174	0.86421	1.07e-70	1.33e-70
VWF	5	-0.073206	-1.8517	0.42729	0.94019	0.064074	0.075409	1.5694	39.335	0.94154	0.99718	0	0
C16orf62	5	0.26167	6.2243	0.82238	0.98661	4.84e-10	9.23e-10	0.95104	21.36	0.37691	0.91164	3.16e-101	4.2e-101
ATP6V0A1	5	0.52595	13.12	0.28934	0.88726	2.54e-39	1.47e-38	1.8382	44.81	0.58841	0.9654	0	0
LGI4	5	0.12901	3.2074	0.84905	0.9894	0.0013392	0.0018036	2.0149	50.102	0.38826	0.91513	0	0
KLF9	5	0.0081754	0.20558	0.57406	0.96456	0.83712	0.85144	2.1582	54.531	0.25756	0.85912	0	0
RNF139	5	0.45595	11.565	0.40018	0.93484	6.18e-31	2.72e-30	1.4426	34.89	0.89108	0.99306	1.07e-266	2.19e-266
GPR179	5	0.088921	2.2177	0.75297	0.98191	0.026577	0.032412	1.154	27.333	0.55367	0.96162	1.72e-164	2.65e-164
ZNF195	9	-0.19108	-6.0342	0.26563	0.87111	1.6e-09	2.97e-09	1.6059	50.446	0.89345	0.99341	0	0
LUM	5	0.50833	10.67	0.3153	0.89752	1.41e-26	5.3e-26	2.0102	41.407	0.39295	0.91844	0	0
CA12	5	0.51013	13.078	0.3125	0.89601	4.42e-39	2.53e-38	2.6655	68.828	0.038847	0.47143	0	0
KCNN3	5	-0.23945	-5.6639	0.21525	0.82548	1.48e-08	2.63e-08	1.1894	27.338	0.59087	0.9654	1.52e-164	2.33e-164
ZCCHC13	5	-0.20365	-4.3643	0.25155	0.86125	1.28e-05	1.95e-05	2.1738	48.088	0.24637	0.85307	0	0
KCNC2	5	0.22375	5.9274	0.91761	0.99473	3.08e-09	5.66e-09	1.9954	52.733	0.40786	0.9254	0	0
MAST1	5	0.018193	0.46732	0.59555	0.96929	0.64027	0.66532	2.2076	57.295	0.2218	0.83439	0	0
MTNR1A	5	0.018716	0.46823	0.5966	0.96949	0.63962	0.66482	1.7438	43.368	0.7086	0.98166	0	0
ITPR1	5	0.3945	10.287	0.51602	0.95738	8.09e-25	2.84e-24	2.0846	54.071	0.31974	0.88847	0	0
SHC1	5	-0.0020891	-0.052608	0.55365	0.96195	0.95804	0.96184	1.5575	38.695	0.95755	0.99817	0	0
COL25A1	5	0.51308	12.793	0.30802	0.89601	1.78e-37	9.74e-37	1.7972	43.691	0.63945	0.97375	0	0
AP5S1	5	0.25325	5.9864	0.84366	0.98892	2.15e-09	3.97e-09	1.521	35.124	0.99409	0.99929	2.89e-270	5.97e-270
SLC9B2	5	0.37546	9.1544	0.55629	0.96337	5.46e-20	1.6e-19	2.0571	49.805	0.34642	0.8978	0	0
TAS2R8	5	0.51409	9.9367	0.30654	0.89601	2.88e-23	9.52e-23	2.0127	37.546	0.3906	0.9167	0	3.81e-308
TOR1A	5	-0.20306	-4.7618	0.2522	0.86179	1.92e-06	3.06e-06	0.95874	21.144	0.38263	0.91325	3.14e-99	4.15e-99
NLRP10	5	0.19307	4.9591	0.99275	0.99878	7.08e-07	1.16e-06	2.2229	57.332	0.21122	0.82516	0	0
KCTD14	5	0.37129	9.5878	0.56487	0.96337	9e-22	2.81e-21	1.9391	49.535	0.46825	0.93789	0	0
KCNN1	5	0.1019	2.6021	0.78386	0.98425	0.0092667	0.011738	0.45794	10.594	0.13445	0.7313	3.19e-26	3.61e-26
RPS6KA4	5	0.043032	0.92322	0.64734	0.97483	0.35589	0.3848	1.9368	41.583	0.47112	0.93796	0	0
PLIN3	5	0.32961	8.4741	0.6608	0.9756	2.37e-17	6.24e-17	2.4943	64.457	0.079494	0.61947	0	0
B4GALT1	5	0.26072	6.4399	0.82481	0.98661	1.2e-10	2.35e-10	0.043101	0.87022	0.054251	0.53519	0.38418	0.38823
ZFYVE26	5	0.15398	3.9428	0.90931	0.99436	8.06e-05	0.0001177	2.2198	57.165	0.21336	0.82629	0	0
NIM1	5	0.090214	2.2242	0.75593	0.98201	0.026136	0.031898	1.1009	25.764	0.50315	0.94703	2.26e-146	3.33e-146
CACHD1	5	-0.017879	-0.45186	0.52302	0.95738	0.65137	0.6758	1.7277	43.463	0.729	0.9818	0	0
ADM2	5	0.63741	16.42	0.16104	0.76236	1.38e-60	1.47e-59	1.4359	35.498	0.88234	0.99296	5.34e-276	1.12e-275
CA3	5	-0.12017	-2.9725	0.35526	0.91979	0.0029541	0.0038881	1.7903	44.339	0.64785	0.97683	0	0
RRP12	5	0.086556	1.4024	0.74695	0.98081	0.16079	0.1817	-1.7524	-9.9684	0.0053196	0.29318	2.1e-23	2.35e-23
MRE11A	5	-0.15184	-2.661	0.31239	0.89601	0.0077912	0.0099329	-1.2919	-9.8831	0.0083736	0.30654	4.93e-23	5.53e-23
SCIN	5	0.64634	14.814	0.15387	0.75429	1.19e-49	9.33e-49	1.102	22.701	0.50418	0.94729	4.39e-114	6.01e-114
ASB16	5	0.22458	5.9296	0.91549	0.99473	3.04e-09	5.58e-09	1.9337	50.839	0.4748	0.94056	0	0
ADAMTS6	5	-0.22464	-4.8281	0.22953	0.83729	1.38e-06	2.22e-06	0.6666	13.334	0.20962	0.8227	1.46e-40	1.71e-40
RASSF8	5	-0.51646	-11.641	0.062969	0.54783	2.54e-31	1.14e-30	1.7897	41.729	0.64872	0.97693	0	0
HSD11B2	5	0.2752	7.1331	0.78932	0.98425	9.81e-13	2.11e-12	2.1366	55.345	0.27484	0.8665	0	0
C14orf79	5	0.36909	9.4997	0.56973	0.96365	2.1e-21	6.48e-21	1.4078	34.974	0.84694	0.9903	5.62e-268	1.15e-267
DACT1	5	0.43291	10.381	0.44163	0.94243	3.03e-25	1.08e-24	0.97809	21.869	0.39837	0.92189	5.14e-106	6.91e-106
TMEM8B	5	0.26214	6.6951	0.82112	0.98661	2.16e-11	4.38e-11	2.3083	59.244	0.15837	0.76708	0	0
SMOX	5	0.33876	7.692	0.63978	0.97483	1.45e-14	3.4e-14	1.4221	30.922	0.8643	0.99172	6.02e-210	1.04e-209
VEGFA	17	0.21024	9.7759	0.95104	0.99564	1.43e-22	4.6e-22	1.4572	65.917	0.91018	0.99483	0	0
TMEM237	5	0.022819	0.55932	0.6049	0.97168	0.57595	0.60307	0.39663	8.5175	0.11749	0.69828	1.63e-17	1.8e-17
PRODH2	5	-0.20791	-5.2815	0.24689	0.85712	1.28e-07	2.17e-07	1.6049	40.636	0.8947	0.99375	0	0
CLCN2	5	0.40962	10.379	0.4866	0.95304	3.08e-25	1.1e-24	2.0568	51.812	0.34673	0.8978	0	0
RRP1B	5	0.11662	2.5609	0.81892	0.9862	0.01044	0.013161	0.72628	14.208	0.23758	0.84645	8.22e-46	9.73e-46
PLXNA1	5	0.16736	3.8448	0.94206	0.99473	0.00012063	0.00017415	1.7205	39.042	0.73843	0.98342	0	0
SNX8	5	0.40363	10.46	0.49801	0.95441	1.32e-25	4.8e-25	1.1687	28.763	0.56896	0.9642	6.25e-182	1.01e-181
GAS2	5	0.15914	3.6211	0.92205	0.99473	0.0002934	0.00041213	2.1276	48.576	0.28201	0.86875	0	0
SEZ6L2	5	0.73057	18.292	0.094586	0.64474	9.54e-75	1.42e-73	1.6387	39.293	0.84948	0.99084	0	0
LCN12	5	0.25351	6.4608	0.84295	0.98892	1.04e-10	2.05e-10	1.2643	30.794	0.67255	0.98041	3.19e-208	5.5e-208
CKMT2	5	0.37525	9.726	0.55664	0.96337	2.34e-22	7.47e-22	1.8767	48.073	0.54127	0.95754	0	0
SAMD13	6	-0.71651	-16.212	0.025609	0.35287	4.17e-59	4.27e-58	1.752	41.149	0.69763	0.98041	0	0
MFAP2	5	0.16145	3.9862	0.92756	0.99473	6.71e-05	9.86e-05	1.6233	39.186	0.87022	0.99174	0	0
TIAM1	5	-0.15232	-3.6718	0.31183	0.89601	0.00024086	0.00034082	1.37	32.48	0.79927	0.98659	2.05e-231	3.78e-231
MGAT4B	5	0.31531	8.2304	0.69374	0.97759	1.87e-16	4.72e-16	1.522	38.873	0.99538	0.99929	0	0
BEST1	5	-0.055151	-1.3895	0.45706	0.94974	0.1647	0.18587	1.7138	42.995	0.74833	0.98497	0	0
ITGB4	5	-0.1714	-4.3683	0.28856	0.88683	1.25e-05	1.92e-05	2.5913	67.72	0.053251	0.53212	0	0
ZNF213	5	0.44851	9.7222	0.41313	0.93562	2.43e-22	7.75e-22	1.7503	36.801	0.70017	0.98041	1.8e-296	4.02e-296
CACNB3	5	0.54028	13.108	0.26999	0.87534	2.98e-39	1.72e-38	1.4311	32.533	0.87637	0.99222	3.67e-232	6.79e-232
CCDC85B	5	0.33072	8.6173	0.65823	0.97493	6.86e-18	1.84e-17	1.504	38.231	0.97169	0.99835	0	0
EFCAB7	5	-0.43424	-9.9485	0.091354	0.6361	2.56e-23	8.47e-23	1.7419	40.737	0.71109	0.98169	0	0
CABP7	5	0.22995	5.9688	0.90213	0.99436	2.39e-09	4.42e-09	1.5488	39.398	0.96912	0.99835	0	0
IRF2	5	-0.9683	-18.648	0.0091732	0.20122	1.3e-77	2.08e-76	-2.024	-15.356	0.0038092	0.26159	3.21e-53	3.87e-53
[truncated: 16,010 more rows]

## Sheet: Top 37 Shared Genes
Gene	2102 BETA	2102 PVAL	2102 FDR	2113 BETA	2113 PVAL	2113 FDR
SOD1	-4.0072	0.00012216	0.081675	-3.5308	0.00016658	0.17297
BRIP1	-3.7808	0.00017769	0.081675	-2.5799	0.0018768	0.1989
ZBTB7B	-3.7135	0.00017769	0.081675	-3.6076	0.00012216	0.17297
G3BP1	-3.5698	0.00023322	0.081675	-2.5224	0.001999	0.1989
KIF18B	-3.4238	0.00026653	0.081675	-4.2183	0	0
FANCI	-3.418	0.00026653	0.081675	-3.1638	0.00054417	0.17297
EIF1AX	-3.1462	0.00033317	0.081675	-4.3482	0	0
SET	-3.0565	0.00033317	0.081675	-3.4702	0.00021101	0.17297
FBXL20	-2.6753	0.00047754	0.081675	-2.4701	0.0022433	0.202
PDS5B	-2.6492	0.00047754	0.081675	-3.3021	0.00036648	0.17297
C12orf75	-2.5656	0.00052196	0.081675	-2.1085	0.0034094	0.24959
LRRC8C	-2.4519	0.0005997	0.081675	-3.7803	3.33e-05	0.12
UBE2A	-2.4489	0.0005997	0.081675	-2.374	0.0025543	0.21698
ZRSR2	-2.2562	0.00072186	0.081675	-3.2955	0.00037759	0.17297
USP39	-2.1486	0.00083292	0.081675	-2.9551	0.00089955	0.17719
FANCA	-2.0855	0.00089955	0.082234	-3.721	4.44e-05	0.13333
KDSR	-2.0801	0.00089955	0.082234	-2.8729	0.0010106	0.17719
UBE2N	-1.9785	0.0010106	0.088182	-2.2438	0.0027986	0.225
XPO4	-1.9618	0.0010328	0.088182	-4.3914	0	0
ACTR1A	-1.8482	0.0012105	0.092373	-2.6405	0.001688	0.19363
RAD18	-1.6853	0.0014548	0.093426	-3.2706	0.00041091	0.17297
EXOSC1	-1.6248	0.001577	0.094771	-2.6491	0.0016769	0.19359
SLX4	-1.6048	0.0016103	0.094771	-2.9179	0.00096618	0.17719
WAC	-1.5607	0.0017436	0.096024	-2.5221	0.001999	0.1989
ARHGAP11B	-1.4496	0.0022322	0.10831	-2.6017	0.0018324	0.1988
MCM8	-1.3951	0.002521	0.11286	-2.4877	0.0021878	0.202
POLH	-1.3788	0.002632	0.11286	-3.7741	3.33e-05	0.12
MT1H	-1.3029	0.0032984	0.12401	-2.8947	0.00098839	0.17719
EIF3L	-1.2711	0.0035871	0.12738	-2.9131	0.00096618	0.17719
UBE2T	-1.2416	0.0038203	0.1313	-2.1756	0.0031429	0.24
C19orf40	-1.2014	0.004309	0.14039	-2.242	0.0028208	0.22578
ERCC6-PGBD3	-1.0967	0.0058415	0.1621	-2.4518	0.0023544	0.2099
ETS2	-1.0739	0.0062857	0.16721	-2.8239	0.0011439	0.17759
DCP2	-1.0512	0.0066967	0.17204	-2.7467	0.0013549	0.18657
ERCC1	-1.0378	0.0070076	0.17479	-3.582	0.00012216	0.17297
SLC30A9	-0.98355	0.0086845	0.19478	-2.8515	0.0010995	0.17719
BRMS1	-0.97385	0.0090177	0.19853	-3.1357	0.00056638	0.17297
