# Supplementary material for: SOD1 is a synthetic-lethal target in PPM1D-mutant leukemia cells
Source: eLife. 2024 Jun 18;12:RP91611. doi: 10.7554/eLife.91611 (PMC11186636; doi:10.7554/eLife.91611)
Supplement: Figure 4—source data 1. [file elife-91611-fig4-data1.xlsx]

## Sheet: PPM1D.EV_over_WT.EV
GeneID	GeneSymbol	GeneBiotype	logFC	logCPM	LR	PValue	FDR
ENSG00000109113	RAB34	protein_coding	-7.5043	4.30524	840.169	9.97311e-185	1.17982e-180
ENSG00000175445	LPL	protein_coding	-5.51011	4.5804	732.887	2.11068e-161	1.24847e-157
ENSG00000067798	NAV3	protein_coding	-3.30912	6.19499	584.154	4.68385e-129	1.847e-125
ENSG00000038427	VCAN	protein_coding	-5.62054	3.8025	571.505	2.64202e-126	7.81378e-123
ENSG00000143340	FAM163A	protein_coding	-8.09978	2.62663	438.091	2.81757e-97	6.66638e-94
ENSG00000122378	PRXL2A	protein_coding	-7.45938	2.6242	430.248	1.43505e-95	2.82945e-92
ENSG00000164825	DEFB1	protein_coding	-2.88785	5.64074	416.968	1.11522e-92	1.88473e-89
ENSG00000124006	OBSL1	protein_coding	-8.22634	2.29039	373.17	3.82018e-83	5.64909e-80
ENSG00000180592	SKIDA1	protein_coding	-7.71476	2.21345	363.458	4.97243e-81	6.53598e-78
ENSG00000196793	ZNF239	protein_coding	-7.45552	1.97079	321.516	6.77262e-72	8.01202e-69
ENSG00000159307	SCUBE1	protein_coding	-5.84475	1.91523	266.671	6.03167e-60	6.48679e-57
ENSG00000103544	VPS35L	protein_coding	-3.40929	3.3396	264.816	1.53029e-59	1.50862e-56
ENSG00000145358	DDIT4L	protein_coding	-7.49096	1.4699	261.107	9.84532e-59	8.95924e-56
ENSG00000177508	IRX3	protein_coding	-4.26366	2.21967	234.398	6.55006e-53	5.5348e-50
ENSG00000113645	WWC1	protein_coding	-7.9263	1.26718	223.667	1.43401e-50	1.13096e-47
ENSG00000005381	MPO	protein_coding	-2.30386	4.87869	223.331	1.69754e-50	1.25512e-47
ENSG00000007171	NOS2	protein_coding	-4.06966	2.20259	219.473	1.17844e-49	8.20059e-47
ENSG00000198346	ZNF813	protein_coding	-7.10154	1.15434	212.167	4.62522e-48	3.03979e-45
ENSG00000056998	GYG2	protein_coding	-7.72546	1.0041	204.227	2.49666e-46	1.5545e-43
ENSG00000133863	TEX15	protein_coding	-9.34663	0.830115	198.79	3.83594e-45	2.26896e-42
ENSG00000251493	FOXD1	protein_coding	-7.67364	0.989921	198.233	5.07607e-45	2.85952e-42
ENSG00000104177	MYEF2	protein_coding	-2.77245	3.39225	196.752	1.06805e-44	5.74321e-42
ENSG00000170456	DENND5B	protein_coding	-9.30744	0.732298	196.657	1.12038e-44	5.76266e-42
ENSG00000167555	ZNF528	protein_coding	-6.48476	1.17426	190.251	2.80207e-43	1.38119e-40
ENSG00000134202	GSTM3	protein_coding	-7.5602	0.831384	188.487	6.8001e-43	3.21781e-40
ENSG00000277443	MARCKS	protein_coding	-1.72881	5.71455	169.931	7.65924e-39	3.48495e-36
ENSG00000112290	WASF1	protein_coding	-2.46721	3.51931	169.125	1.14872e-38	5.03309e-36
ENSG00000171160	MORN4	protein_coding	-7.22249	0.45515	158.983	1.88768e-36	7.97545e-34
ENSG00000003989	SLC7A2	protein_coding	-8.89992	0.435878	158.031	3.04693e-36	1.24294e-33
ENSG00000055118	KCNH2	protein_coding	-3.51	1.86518	157.088	4.89586e-36	1.9306e-33
ENSG00000133105	RXFP2	protein_coding	-1.96068	4.48466	150.858	1.12564e-34	4.29559e-32
ENSG00000166068	SPRED1	protein_coding	-7.13428	0.632834	143.094	5.60505e-33	2.07212e-30
ENSG00000088882	CPXM1	protein_coding	-1.61878	5.51444	142.172	8.91791e-33	3.19694e-30
ENSG00000133048	CHI3L1	protein_coding	1.34759	8.06243	139.559	3.32437e-32	1.15668e-29
ENSG00000179083	FAM133A	protein_coding	3.61412	1.69984	139.349	3.69419e-32	1.24864e-29
ENSG00000113739	STC2	protein_coding	-3.94465	1.09856	136.649	1.43931e-31	4.72973e-29
ENSG00000165731	RET	protein_coding	-1.90843	4.29377	135.873	2.12681e-31	6.80005e-29
ENSG00000187068	C3orf70	protein_coding	-5.30489	0.616511	135.451	2.63083e-31	8.19018e-29
ENSG00000198715	GLMP	protein_coding	-2.64288	2.52538	134.114	5.15902e-31	1.5649e-28
ENSG00000179348	GATA2	protein_coding	-2.44289	2.9014	133.393	7.41613e-31	2.19332e-28
ENSG00000138772	ANXA3	protein_coding	-6.18843	0.198286	131.911	1.56471e-30	4.51476e-28
ENSG00000010818	HIVEP2	protein_coding	-3.52412	1.37686	130.696	2.88651e-30	8.13035e-28
ENSG00000124762	CDKN1A	protein_coding	1.26891	8.91025	129.96	4.18032e-30	1.15008e-27
ENSG00000136010	ALDH1L2	protein_coding	-1.68082	4.85799	124.966	5.17834e-29	1.39227e-26
ENSG00000100985	MMP9	protein_coding	1.43387	6.0828	124.919	5.3009e-29	1.39355e-26
ENSG00000167972	ABCA3	protein_coding	-3.52988	1.38064	124.558	6.35978e-29	1.63557e-26
ENSG00000147255	IGSF1	protein_coding	-1.30524	7.20445	124.129	7.89577e-29	1.98738e-26
ENSG00000116157	GPX7	protein_coding	-2.16763	3.20088	121.459	3.03179e-28	7.47209e-26
ENSG00000205213	LGR4	protein_coding	-1.45604	5.64777	120.371	5.24787e-28	1.26699e-25
ENSG00000178773	CPNE7	protein_coding	-3.86742	0.864001	116.774	3.21656e-27	7.61037e-25
ENSG00000180828	BHLHE22	protein_coding	-5.0595	0.415917	115.723	5.46479e-27	1.26762e-24
ENSG00000165152	TMEM246	protein_coding	-8.29616	-0.106469	114.94	8.11095e-27	1.84524e-24
ENSG00000104341	LAPTM4B	protein_coding	-4.84493	0.42126	114.42	1.05421e-26	2.35308e-24
ENSG00000258227	CLEC5A	protein_coding	-1.20091	8.38506	113.907	1.36574e-26	2.99198e-24
ENSG00000174307	PHLDA3	protein_coding	1.33049	6.22935	111.753	4.04634e-26	8.70331e-24
ENSG00000109762	SNX25	protein_coding	-3.5792	0.92093	111.472	4.66314e-26	9.85089e-24
ENSG00000106484	MEST	protein_coding	-2.66646	1.91163	108.704	1.88471e-25	3.9116e-23
ENSG00000130487	KLHDC7B	protein_coding	-4.31955	0.431919	108.122	2.52681e-25	5.15381e-23
ENSG00000214279	SCART1	protein_coding	1.39812	5.54645	107.242	3.93945e-25	7.89893e-23
ENSG00000087116	ADAMTS2	protein_coding	-2.78813	1.74857	106.161	6.79682e-25	1.34011e-22
ENSG00000132514	CLEC10A	protein_coding	1.58364	4.71478	105.636	8.85929e-25	1.71812e-22
ENSG00000075618	FSCN1	protein_coding	-1.40171	5.40565	104.815	1.34064e-24	2.55803e-22
ENSG00000214787	MS4A4E	protein_coding	-1.66395	4.19705	102.664	3.97152e-24	7.45763e-22
ENSG00000228594	FNDC10	protein_coding	-8.26167	0.116235	100.943	9.46503e-24	1.74955e-21
ENSG00000075275	CELSR1	protein_coding	-2.72843	1.67458	100.801	1.01729e-23	1.85146e-21
ENSG00000163710	PCOLCE2	protein_coding	-6.45143	-0.120895	100.687	1.0774e-23	1.93116e-21
ENSG00000263961	RHEX	protein_coding	-2.23095	2.42892	98.8129	2.77527e-23	4.90022e-21
ENSG00000120708	TGFBI	protein_coding	1.16075	7.1394	97.9993	4.18535e-23	7.28129e-21
ENSG00000015413	DPEP1	protein_coding	-6.39783	-0.179444	97.8569	4.49736e-23	7.71069e-21
ENSG00000187134	AKR1C1	protein_coding	-3.21297	0.934514	97.0784	6.66357e-23	1.12614e-20
ENSG00000101197	BIRC7	protein_coding	-4.95523	-0.0723598	96.6176	8.40955e-23	1.4012e-20
ENSG00000176171	BNIP3	protein_coding	-1.32341	5.5032	96.3294	9.72735e-23	1.59826e-20
ENSG00000151632	AKR1C2	protein_coding	-2.54251	1.75375	95.6929	1.34163e-22	2.17418e-20
ENSG00000114948	ADAM23	protein_coding	-2.45901	1.87358	94.4633	2.49682e-22	3.99153e-20
ENSG00000160593	JAML	protein_coding	1.22325	6.11461	93.8091	3.47464e-22	5.48066e-20
ENSG00000196867	ZFP28	protein_coding	-5.70731	0.0054022	92.8437	5.6592e-22	8.809e-20
ENSG00000160233	LRRC3	protein_coding	-5.58243	-0.310108	92.504	6.71874e-22	1.03224e-19
ENSG00000087245	MMP2	protein_coding	1.56437	4.31571	91.5719	1.07612e-21	1.63211e-19
ENSG00000111199	TRPV4	protein_coding	1.863	3.2734	89.2727	3.4397e-21	5.15084e-19
ENSG00000267508	ZNF285	protein_coding	-7.72118	-0.745443	86.5036	1.39482e-20	2.0626e-18
ENSG00000170458	CD14	protein_coding	-1.20387	5.79699	86.2893	1.55449e-20	2.27032e-18
ENSG00000156299	TIAM1	protein_coding	2.17698	2.34902	85.7805	2.01064e-20	2.90071e-18
ENSG00000177614	PGBD5	protein_coding	-4.78054	-0.174446	85.0856	2.85723e-20	4.07242e-18
ENSG00000153823	PID1	protein_coding	-7.72338	-0.646753	84.264	4.32921e-20	6.09697e-18
ENSG00000173546	CSPG4	protein_coding	1.19418	5.75569	83.6488	5.90958e-20	8.22474e-18
ENSG00000060718	COL11A1	protein_coding	1.91728	2.81751	81.8731	1.45112e-19	1.99614e-17
ENSG00000128268	MGAT3	protein_coding	1.36928	4.76925	81.7644	1.53315e-19	2.08473e-17
ENSG00000148600	CDHR1	protein_coding	-4.32939	0.00792542	79.9555	3.82935e-19	5.14786e-17
ENSG00000149516	MS4A3	protein_coding	-0.968515	9.75216	79.5482	4.70615e-19	6.25548e-17
ENSG00000203710	CR1	protein_coding	-1.05486	6.89441	79.3258	5.26681e-19	6.92293e-17
ENSG00000135218	CD36	protein_coding	-1.12429	6.03321	79.2282	5.53346e-19	7.19349e-17
ENSG00000171509	RXFP1	protein_coding	-1.22958	5.29477	79.051	6.05262e-19	7.78288e-17
ENSG00000104219	ZDHHC2	protein_coding	-1.11073	6.14992	78.748	7.05592e-19	8.97543e-17
ENSG00000187479	C11orf96	protein_coding	-7.56529	-0.856255	78.6564	7.39106e-19	9.30172e-17
ENSG00000106031	HOXA13	protein_coding	-5.38519	-0.374779	78.5213	7.91391e-19	9.8549e-17
ENSG00000159784	FAM131B	protein_coding	-2.28013	1.65775	76.0224	2.80463e-18	3.45612e-16
ENSG00000099194	SCD	protein_coding	-0.944509	9.65568	75.4786	3.69398e-18	4.50513e-16
ENSG00000142621	FHAD1	protein_coding	-4.33704	-0.338467	74.4298	6.28346e-18	7.58503e-16
ENSG00000118785	SPP1	protein_coding	-1.1521	5.51976	73.9211	8.13024e-18	9.71522e-16
ENSG00000181381	DDX60L	protein_coding	-0.989956	7.16268	72.236	1.90941e-17	2.25883e-15
ENSG00000130513	GDF15	protein_coding	1.69701	3.26208	72.1007	2.04486e-17	2.39512e-15
ENSG00000114805	PLCH1	protein_coding	2.79199	1.02002	72.0652	2.08199e-17	2.4147e-15
ENSG00000109107	ALDOC	protein_coding	-1.26634	4.7969	71.5767	2.66686e-17	3.063e-15
ENSG00000171408	PDE7B	protein_coding	-2.55549	1.02078	71.1468	3.31616e-17	3.77213e-15
ENSG00000104918	RETN	protein_coding	-2.05678	1.89803	71.048	3.48647e-17	3.92809e-15
ENSG00000117091	CD48	protein_coding	1.07857	5.88995	70.8804	3.79556e-17	4.23599e-15
ENSG00000170542	SERPINB9	protein_coding	-2.16603	1.67369	70.5663	4.45059e-17	4.92061e-15
ENSG00000100979	PLTP	protein_coding	-1.36981	4.13689	69.9964	5.94134e-17	6.50797e-15
ENSG00000198561	CTNND1	protein_coding	1.04848	6.08171	69.1869	8.95626e-17	9.72042e-15
ENSG00000136235	GPNMB	protein_coding	-1.04917	6.02005	69.0601	9.55073e-17	1.02714e-14
ENSG00000018189	RUFY3	protein_coding	-2.73682	0.673504	68.9344	1.01795e-16	1.0849e-14
ENSG00000158517	NCF1	protein_coding	-0.980005	6.88447	68.6097	1.20011e-16	1.26762e-14
ENSG00000163145	C1QTNF7	protein_coding	-5.20288	-0.494954	68.5879	1.21345e-16	1.27037e-14
ENSG00000123689	G0S2	protein_coding	-1.68446	2.83613	68.5472	1.23876e-16	1.28548e-14
ENSG00000163808	KIF15	protein_coding	-1.10951	5.47849	68.2386	1.44864e-16	1.49021e-14
ENSG00000181458	TMEM45A	protein_coding	-1.51519	3.42684	67.9596	1.66882e-16	1.70191e-14
ENSG00000164749	HNF4G	protein_coding	-3.47448	0.14214	67.8973	1.72234e-16	1.74148e-14
ENSG00000124731	TREM1	protein_coding	-1.09925	5.50733	67.5484	2.05576e-16	2.06098e-14
ENSG00000166825	ANPEP	protein_coding	1.14203	5.26547	66.8289	2.96132e-16	2.9439e-14
ENSG00000030582	GRN	protein_coding	-0.894599	9.15803	66.5062	3.48789e-16	3.43848e-14
ENSG00000166927	MS4A7	protein_coding	-1.00196	6.34604	66.4105	3.66148e-16	3.57978e-14
ENSG00000254415	SIGLEC14	protein_coding	1.0966	5.52535	66.3635	3.74974e-16	3.63602e-14
ENSG00000111817	DSE	protein_coding	1.41233	3.91419	66.3339	3.80661e-16	3.66116e-14
ENSG00000125538	IL1B	protein_coding	-0.923734	7.8361	66.0186	4.46693e-16	4.26159e-14
ENSG00000124613	ZNF391	protein_coding	-5.92785	-0.396781	65.4932	5.83147e-16	5.5189e-14
ENSG00000179163	FUCA1	protein_coding	1.01473	6.09413	65.1025	7.11035e-16	6.67583e-14
ENSG00000119630	PGF	protein_coding	1.4051	3.78581	64.8829	7.94857e-16	7.40407e-14
ENSG00000157227	MMP14	protein_coding	0.877412	9.37052	64.583	9.25497e-16	8.55362e-14
ENSG00000174776	WDR49	protein_coding	-1.39928	3.71431	64.4059	1.01257e-15	9.28579e-14
ENSG00000161944	ASGR2	protein_coding	1.24161	4.55905	64.0527	1.21136e-15	1.10234e-13
ENSG00000185745	IFIT1	protein_coding	-1.70589	2.52601	63.2026	1.86505e-15	1.68424e-13
ENSG00000111490	TBC1D30	protein_coding	-1.2719	4.33403	63.0562	2.00888e-15	1.80038e-13
ENSG00000155966	AFF2	protein_coding	-1.26122	4.3128	62.813	2.27296e-15	2.02174e-13
ENSG00000148400	NOTCH1	protein_coding	0.948815	6.74938	62.7456	2.35211e-15	2.07653e-13
ENSG00000167996	FTH1	protein_coding	0.984014	6.20544	62.4164	2.78e-15	2.4361e-13
ENSG00000246705	H2AFJ	protein_coding	-1.35687	3.81199	62.3474	2.87916e-15	2.50444e-13
ENSG00000119917	IFIT3	protein_coding	-1.4465	3.41347	62.2819	2.9765e-15	2.57022e-13
ENSG00000126091	ST3GAL3	protein_coding	-1.25222	4.33894	62.259	3.01134e-15	2.58146e-13
ENSG00000175489	LRRC25	protein_coding	-1.12061	5.09368	62.0662	3.32096e-15	2.8264e-13
ENSG00000102265	TIMP1	protein_coding	0.909082	7.30073	61.5891	4.23164e-15	3.57574e-13
ENSG00000188822	CNR2	protein_coding	1.70967	2.56453	61.1391	5.31805e-15	4.46188e-13
ENSG00000163221	S100A12	protein_coding	-1.07524	5.29426	60.9188	5.94793e-15	4.95522e-13
ENSG00000125735	TNFSF14	protein_coding	1.24453	4.27957	59.7201	1.09356e-14	9.04676e-13
ENSG00000112378	PERP	protein_coding	-7.29787	-0.833485	59.5921	1.167e-14	9.58722e-13
ENSG00000120875	DUSP4	protein_coding	1.29459	4.01534	59.498	1.2242e-14	9.98776e-13
ENSG00000061492	WNT8A	protein_coding	5.66441	-0.60095	59.1351	1.47207e-14	1.19278e-12
ENSG00000126709	IFI6	protein_coding	-0.945193	6.32945	59.0949	1.5025e-14	1.20915e-12
ENSG00000138028	CGREF1	protein_coding	-1.07435	5.2004	58.9865	1.58759e-14	1.269e-12
ENSG00000143061	IGSF3	protein_coding	-4.92436	-0.808125	58.7969	1.74814e-14	1.38795e-12
ENSG00000116701	NCF2	protein_coding	-0.868307	7.89796	58.7727	1.76977e-14	1.39155e-12
ENSG00000181577	C6orf223	protein_coding	-0.924969	6.5713	58.7656	1.77619e-14	1.39155e-12
ENSG00000197343	ZNF655	protein_coding	-1.02412	5.487	58.4856	2.04786e-14	1.59383e-12
ENSG00000169508	GPR183	protein_coding	1.26674	4.07505	58.1265	2.45788e-14	1.90044e-12
ENSG00000130592	LSP1	protein_coding	0.923786	6.52227	57.7818	2.92866e-14	2.24974e-12
ENSG00000088827	SIGLEC1	protein_coding	-1.17688	4.48987	57.5147	3.35456e-14	2.56028e-12
ENSG00000159164	SV2A	protein_coding	-3.19829	-0.00799983	57.4178	3.52408e-14	2.67243e-12
ENSG00000116985	BMP8B	protein_coding	-0.906978	6.65816	57.2311	3.87492e-14	2.91976e-12
ENSG00000137693	YAP1	protein_coding	1.79118	2.19837	57.1826	3.97167e-14	2.97373e-12
ENSG00000147465	STAR	protein_coding	-1.00041	5.55504	56.7882	4.85381e-14	3.61135e-12
ENSG00000159674	SPON2	protein_coding	-1.08134	5.02326	56.6389	5.23648e-14	3.87172e-12
ENSG00000204271	SPIN3	protein_coding	-3.94442	-0.676218	56.5222	5.55664e-14	4.08292e-12
ENSG00000136014	USP44	protein_coding	2.11359	1.43154	56.3453	6.07989e-14	4.43982e-12
ENSG00000162594	IL23R	protein_coding	-1.56697	2.64509	56.2454	6.39673e-14	4.64254e-12
ENSG00000134827	TCN1	protein_coding	-1.3527	3.48501	56.1838	6.60016e-14	4.76097e-12
ENSG00000152192	POU4F1	protein_coding	-5.42715	-1.15638	56.1331	6.77276e-14	4.85586e-12
ENSG00000119922	IFIT2	protein_coding	-1.60529	2.48166	55.8245	7.92359e-14	5.64675e-12
ENSG00000134247	PTGFRN	protein_coding	0.936627	6.05866	55.2259	1.07443e-13	7.61106e-12
ENSG00000159335	PTMS	protein_coding	1.06803	5.05763	55.1067	1.14163e-13	8.03901e-12
ENSG00000145632	PLK2	protein_coding	1.11606	4.73102	54.8119	1.32638e-13	9.28464e-12
ENSG00000147592	LACTB2	protein_coding	-1.39567	3.23936	54.5476	1.5173e-13	1.05586e-11
ENSG00000197122	SRC	protein_coding	1.00663	5.38918	54.0782	1.92667e-13	1.3329e-11
ENSG00000108947	EFNB3	protein_coding	-3.46944	-0.509437	53.959	2.0472e-13	1.40805e-11
ENSG00000125730	C3	protein_coding	0.978695	5.55107	53.9223	2.08573e-13	1.42625e-11
ENSG00000151651	ADAM8	protein_coding	0.851592	7.23422	53.8417	2.17307e-13	1.47744e-11
ENSG00000099814	CEP170B	protein_coding	-4.42408	-0.757187	53.7306	2.29958e-13	1.55452e-11
ENSG00000143546	S100A8	protein_coding	-0.805963	8.73379	53.0583	3.23791e-13	2.17639e-11
ENSG00000124570	SERPINB6	protein_coding	-0.903475	6.19978	53.0051	3.32682e-13	2.22352e-11
ENSG00000133317	LGALS12	protein_coding	1.06219	4.93845	52.4039	4.51814e-13	3.00279e-11
ENSG00000148143	ZNF462	protein_coding	1.3701	3.29822	52.2697	4.83771e-13	3.19721e-11
ENSG00000187091	PLCD1	protein_coding	1.40752	3.16334	52.1658	5.10055e-13	3.3522e-11
ENSG00000135636	DYSF	protein_coding	-0.872938	6.50065	51.8348	6.03734e-13	3.94595e-11
ENSG00000115590	IL1R2	protein_coding	2.0945	1.82604	51.555	6.9618e-13	4.50957e-11
ENSG00000074410	CA12	protein_coding	-4.71343	-1.0262	51.5511	6.97591e-13	4.50957e-11
ENSG00000169896	ITGAM	protein_coding	-0.919579	5.77692	51.1508	8.5536e-13	5.49941e-11
ENSG00000104611	SH2D4A	protein_coding	-1.32462	3.34084	51.1396	8.60241e-13	5.50089e-11
ENSG00000166199	ALKBH3	protein_coding	-1.36754	3.15418	51.1198	8.6898e-13	5.5269e-11
ENSG00000005187	ACSM3	protein_coding	-1.65933	2.06882	50.8992	9.72339e-13	6.15121e-11
ENSG00000161513	FDXR	protein_coding	1.03796	4.96305	50.5025	1.19012e-12	7.48887e-11
ENSG00000204272	NBDY	protein_coding	1.33434	3.32645	50.47	1.21002e-12	7.57384e-11
ENSG00000178096	BOLA1	protein_coding	-1.65948	2.05797	50.3364	1.29522e-12	8.06447e-11
ENSG00000249992	TMEM158	protein_coding	-1.23128	3.68582	49.9862	1.54834e-12	9.58999e-11
ENSG00000266074	BAHCC1	protein_coding	-1.63383	2.11961	49.934	1.59002e-12	9.79683e-11
ENSG00000234465	PINLYP	protein_coding	-1.03217	4.89619	49.6617	1.82682e-12	1.11975e-10
ENSG00000177606	JUN	protein_coding	-1.11599	4.30511	49.5416	1.94208e-12	1.18427e-10
ENSG00000110455	ACCS	protein_coding	-1.12062	4.27784	49.4641	2.0204e-12	1.22571e-10
ENSG00000196371	FUT4	protein_coding	-0.795753	7.78878	49.1322	2.39279e-12	1.44422e-10
ENSG00000133055	MYBPH	protein_coding	1.35573	3.16347	49.0526	2.49186e-12	1.49638e-10
ENSG00000095970	TREM2	protein_coding	1.53293	2.49239	48.9144	2.67379e-12	1.59294e-10
ENSG00000133739	LRRCC1	protein_coding	-0.989143	5.11376	48.9102	2.67959e-12	1.59294e-10
ENSG00000006530	AGK	protein_coding	-2.1242	0.819107	48.6237	3.10099e-12	1.83423e-10
ENSG00000157827	FMNL2	protein_coding	-1.87425	1.44064	48.4851	3.32815e-12	1.9588e-10
ENSG00000167210	LOXHD1	protein_coding	-0.935415	5.45203	48.3966	3.48171e-12	2.03904e-10
ENSG00000155657	TTN	protein_coding	-1.04038	4.75528	48.3512	3.5633e-12	2.0705e-10
ENSG00000166432	ZMAT1	protein_coding	-1.31466	3.20125	48.3473	3.57043e-12	2.0705e-10
ENSG00000117480	FAAH	protein_coding	-1.04984	4.65608	48.1488	3.95073e-12	2.27986e-10
ENSG00000130477	UNC13A	protein_coding	2.02416	1.25169	48.1244	4.00019e-12	2.2972e-10
ENSG00000196878	LAMB3	protein_coding	1.15482	4.13681	47.848	4.60576e-12	2.63218e-10
ENSG00000176024	ZNF613	protein_coding	-1.64351	1.91115	47.7172	4.9235e-12	2.80024e-10
ENSG00000103037	SETD6	protein_coding	-1.09199	4.31493	47.4747	5.57188e-12	3.15384e-10
ENSG00000161011	SQSTM1	protein_coding	-0.809917	6.94119	47.4464	5.65282e-12	3.18442e-10
ENSG00000085719	CPNE3	protein_coding	-0.939019	5.33911	47.3505	5.93638e-12	3.32831e-10
ENSG00000114455	HHLA2	protein_coding	-1.42008	2.70455	47.3285	6.00336e-12	3.34999e-10
ENSG00000145087	STXBP5L	protein_coding	-2.23767	0.740747	47.3163	6.04077e-12	3.35504e-10
ENSG00000163220	S100A9	protein_coding	-0.745462	9.61567	47.2804	6.15229e-12	3.40101e-10
ENSG00000135679	MDM2	protein_coding	0.764388	8.48746	47.1033	6.73407e-12	3.7053e-10
ENSG00000184985	SORCS2	protein_coding	-1.35029	2.98129	47.0118	7.05592e-12	3.86442e-10
ENSG00000149485	FADS1	protein_coding	-0.765596	8.31714	46.9248	7.37624e-12	4.02124e-10
ENSG00000132199	ENOSF1	protein_coding	-1.13666	4.04734	46.6405	8.52782e-12	4.62771e-10
ENSG00000110077	MS4A6A	protein_coding	-0.846669	6.17903	46.5028	9.14865e-12	4.94194e-10
ENSG00000124508	BTN2A2	protein_coding	-1.03125	4.64202	46.4522	9.38821e-12	5.0483e-10
ENSG00000151135	TMEM263	protein_coding	-4.15267	-1.08081	46.4171	9.55775e-12	5.11621e-10
ENSG00000205426	KRT81	protein_coding	1.43935	2.66475	46.2756	1.02737e-11	5.47469e-10
ENSG00000219607	PPP1R3G	protein_coding	-1.22409	3.47378	46.2212	1.0563e-11	5.60361e-10
ENSG00000055732	MCOLN3	protein_coding	-4.23269	-0.907423	46.1659	1.08652e-11	5.73817e-10
ENSG00000114204	SERPINI2	protein_coding	-1.28072	3.21349	46.0857	1.13194e-11	5.95147e-10
ENSG00000168758	SEMA4C	protein_coding	0.835851	6.32628	46.0055	1.17923e-11	6.17272e-10
ENSG00000180537	RNF182	protein_coding	-4.609	-1.03173	45.9314	1.22468e-11	6.38236e-10
ENSG00000197808	ZNF461	protein_coding	-1.61567	1.88506	45.7665	1.33222e-11	6.91237e-10
ENSG00000163040	CCDC74A	protein_coding	-2.32222	0.556153	45.716	1.36701e-11	7.06188e-10
ENSG00000109906	ZBTB16	protein_coding	-3.72158	-0.757267	45.3503	1.64765e-11	8.47463e-10
ENSG00000185950	IRS2	protein_coding	-0.957102	5.06432	45.1466	1.82818e-11	9.36252e-10
ENSG00000149179	C11orf49	protein_coding	-1.67608	1.71887	44.9028	2.07062e-11	1.05584e-09
ENSG00000027075	PRKCH	protein_coding	-1.49483	2.24921	44.8417	2.13624e-11	1.08463e-09
ENSG00000132965	ALOX5AP	protein_coding	0.735442	9.00737	44.8326	2.14617e-11	1.08501e-09
ENSG00000115295	CLIP4	protein_coding	-1.29698	3.07136	44.7348	2.25607e-11	1.13571e-09
ENSG00000174099	MSRB3	protein_coding	-0.832599	6.1386	44.7083	2.28685e-11	1.14633e-09
ENSG00000112195	TREML2	protein_coding	0.849877	5.91333	44.6132	2.40066e-11	1.19831e-09
ENSG00000007237	GAS7	protein_coding	-0.803341	6.58385	44.5763	2.44634e-11	1.21597e-09
ENSG00000145569	OTULINL	protein_coding	-0.955776	5.02702	44.4805	2.56907e-11	1.27163e-09
ENSG00000125144	MT1G	protein_coding	-2.97123	-0.510255	43.912	3.43471e-11	1.69303e-09
ENSG00000158639	PAGE5	protein_coding	-3.6372	-0.884476	43.5597	4.11217e-11	2.01854e-09
ENSG00000172667	ZMAT3	protein_coding	0.795645	6.58609	43.4293	4.39556e-11	2.14874e-09
ENSG00000182963	GJC1	protein_coding	-3.63182	-0.884829	43.1642	5.03323e-11	2.45033e-09
ENSG00000167850	CD300C	protein_coding	1.02241	4.48986	42.9568	5.59611e-11	2.7132e-09
ENSG00000139626	ITGB7	protein_coding	0.799469	6.40683	42.6921	6.40713e-11	3.09373e-09
ENSG00000185513	L3MBTL1	protein_coding	-1.93532	0.94316	42.5979	6.72332e-11	3.23321e-09
ENSG00000137959	IFI44L	protein_coding	-1.36672	2.57411	42.5729	6.8097e-11	3.24894e-09
ENSG00000073670	ADAM11	protein_coding	1.03556	4.3545	42.5725	6.81096e-11	3.24894e-09
ENSG00000165474	GJB2	protein_coding	-4.40807	-1.30404	42.4328	7.31541e-11	3.47555e-09
ENSG00000166582	CENPV	protein_coding	-1.01015	4.44993	42.4236	7.34983e-11	3.47794e-09
ENSG00000169385	RNASE2	protein_coding	-0.73201	8.02505	42.2539	8.01601e-11	3.77806e-09
ENSG00000117984	CTSD	protein_coding	-0.795538	6.3637	42.2423	8.06388e-11	3.78554e-09
ENSG00000134627	PIWIL4	protein_coding	-0.844065	5.68135	42.226	8.13115e-11	3.80204e-09
ENSG00000134594	RAB33A	protein_coding	-1.22212	3.20955	42.1282	8.54814e-11	3.98128e-09
ENSG00000157833	GAREM2	protein_coding	-1.32739	2.72784	42.0862	8.73357e-11	4.05169e-09
ENSG00000167554	ZNF610	protein_coding	-2.13874	0.428573	42.0149	9.05799e-11	4.18578e-09
ENSG00000163807	KIAA1143	protein_coding	-0.868015	5.45637	41.9035	9.58904e-11	4.41394e-09
ENSG00000159339	PADI4	protein_coding	-0.81551	5.99958	41.8767	9.72154e-11	4.45759e-09
ENSG00000127920	GNG11	protein_coding	-2.10109	0.565328	41.5012	1.17799e-10	5.38054e-09
ENSG00000134531	EMP1	protein_coding	-0.96885	4.66466	41.3699	1.2598e-10	5.72963e-09
ENSG00000118257	NRP2	protein_coding	-2.0358	0.601876	41.3633	1.2641e-10	5.72963e-09
ENSG00000134824	FADS2	protein_coding	-0.705128	8.90144	41.0658	1.47192e-10	6.64612e-09
ENSG00000181433	SAGE1	protein_coding	-3.73268	-1.11329	41.0294	1.49953e-10	6.74503e-09
ENSG00000108679	LGALS3BP	protein_coding	1.17914	3.46049	40.9023	1.60031e-10	7.1711e-09
ENSG00000118513	MYB	protein_coding	-0.707015	8.70726	40.8872	1.61277e-10	7.19965e-09
ENSG00000126822	PLEKHG3	protein_coding	0.947073	4.85204	40.8684	1.62833e-10	7.24177e-09
ENSG00000166928	MS4A14	protein_coding	-0.995217	4.41044	40.8196	1.6695e-10	7.38648e-09
ENSG00000095261	PSMD5	protein_coding	-0.861899	5.41063	40.8151	1.67335e-10	7.38648e-09
ENSG00000172179	PRL	protein_coding	1.9669	0.938372	40.7342	1.74408e-10	7.67008e-09
ENSG00000076356	PLXNA2	protein_coding	1.37653	2.54042	40.4196	2.04878e-10	8.97668e-09
ENSG00000139220	PPFIA2	protein_coding	2.57131	0.055632	40.0429	2.48448e-10	1.08455e-08
ENSG00000066279	ASPM	protein_coding	0.722827	7.61757	39.9515	2.60341e-10	1.13229e-08
ENSG00000153898	MCOLN2	protein_coding	-0.823179	5.64287	39.738	2.90418e-10	1.25848e-08
ENSG00000117525	F3	protein_coding	0.968318	4.54563	39.4976	3.28467e-10	1.41816e-08
ENSG00000111052	LIN7A	protein_coding	-0.900931	5.00978	39.422	3.41424e-10	1.46874e-08
ENSG00000182985	CADM1	protein_coding	0.8042	5.81463	39.3846	3.48029e-10	1.49027e-08
ENSG00000147614	ATP6V0D2	protein_coding	-1.62501	1.4739	39.3795	3.48948e-10	1.49027e-08
ENSG00000184226	PCDH9	protein_coding	-0.833329	5.51603	39.2715	3.68785e-10	1.56933e-08
ENSG00000131355	ADGRE3	protein_coding	1.26055	3.32324	39.1994	3.82661e-10	1.62254e-08
ENSG00000186350	RXRA	protein_coding	0.840877	5.47082	39.1468	3.93116e-10	1.66092e-08
ENSG00000171115	GIMAP8	protein_coding	1.21755	3.09538	39.0761	4.07599e-10	1.71598e-08
ENSG00000079385	CEACAM1	protein_coding	2.07275	0.797784	39.0634	4.10264e-10	1.72107e-08
ENSG00000104870	FCGRT	protein_coding	-0.933466	4.73809	39.0399	4.15236e-10	1.73577e-08
ENSG00000005961	ITGA2B	protein_coding	0.842782	5.43887	38.9966	4.24535e-10	1.7684e-08
ENSG00000144026	ZNF514	protein_coding	-1.04627	3.90482	38.9813	4.27891e-10	1.77612e-08
ENSG00000182580	EPHB3	protein_coding	1.28498	2.80415	38.8924	4.47824e-10	1.85236e-08
ENSG00000156970	BUB1B	protein_coding	0.738729	6.80051	38.7425	4.83573e-10	1.99326e-08
ENSG00000164485	IL22RA2	protein_coding	-0.955317	4.51388	38.6178	5.15469e-10	2.11454e-08
ENSG00000104765	BNIP3L	protein_coding	-0.762267	6.31783	38.6136	5.16569e-10	2.11454e-08
ENSG00000085514	PILRA	protein_coding	-0.939826	4.63967	38.56	5.3097e-10	2.16599e-08
ENSG00000145555	MYO10	protein_coding	-1.2782	2.68521	38.5286	5.39584e-10	2.19357e-08
ENSG00000011422	PLAUR	protein_coding	0.705774	7.64803	38.3951	5.77763e-10	2.34073e-08
ENSG00000115155	OTOF	protein_coding	-0.895073	4.95945	38.2688	6.16397e-10	2.48862e-08
ENSG00000253368	TRNP1	protein_coding	-2.54665	-0.205114	38.2623	6.18473e-10	2.48862e-08
ENSG00000181019	NQO1	protein_coding	0.839774	5.37194	38.1338	6.60543e-10	2.64689e-08
ENSG00000172403	SYNPO2	protein_coding	-0.857424	5.22121	38.1287	6.62281e-10	2.64689e-08
ENSG00000026950	BTN3A1	protein_coding	-0.809596	5.57811	37.7389	8.08773e-10	3.22148e-08
ENSG00000087088	BAX	protein_coding	0.695102	7.86409	37.7135	8.19359e-10	3.25269e-08
ENSG00000110092	CCND1	protein_coding	0.894579	4.9439	37.6926	8.28199e-10	3.27679e-08
ENSG00000135048	CEMIP2	protein_coding	1.01278	4.05265	37.4902	9.18741e-10	3.6229e-08
ENSG00000181026	AEN	protein_coding	0.730948	6.68895	37.3982	9.6311e-10	3.78525e-08
ENSG00000162645	GBP2	protein_coding	-1.00078	4.05652	37.3515	9.86456e-10	3.86416e-08
ENSG00000042493	CAPG	protein_coding	0.674081	8.7641	37.2806	1.02297e-09	3.99398e-08
ENSG00000122966	CIT	protein_coding	0.779182	5.86767	37.2511	1.03857e-09	4.04154e-08
ENSG00000198721	ECI2	protein_coding	2.20248	0.340099	37.1947	1.06903e-09	4.14645e-08
ENSG00000049130	KITLG	protein_coding	1.48002	2.00733	37.1614	1.08746e-09	4.20412e-08
ENSG00000147454	SLC25A37	protein_coding	-0.698307	7.32463	36.7741	1.32639e-09	5.11114e-08
ENSG00000088256	GNA11	protein_coding	-3.03381	-0.823375	36.6172	1.43755e-09	5.50545e-08
ENSG00000139629	GALNT6	protein_coding	0.771509	5.88598	36.6166	1.43803e-09	5.50545e-08
ENSG00000161642	ZNF385A	protein_coding	0.697495	7.32995	36.5731	1.47044e-09	5.61139e-08
ENSG00000148773	MKI67	protein_coding	0.661588	9.12849	36.5107	1.51828e-09	5.77533e-08
ENSG00000073282	TP63	protein_coding	-1.60066	1.37298	36.2724	1.71577e-09	6.50564e-08
ENSG00000163281	GNPDA2	protein_coding	-0.99225	4.01624	36.2616	1.72534e-09	6.52102e-08
ENSG00000167460	TPM4	protein_coding	-0.702132	7.04613	36.2356	1.74848e-09	6.57715e-08
ENSG00000117724	CENPF	protein_coding	0.663702	8.83248	36.2324	1.75131e-09	6.57715e-08
ENSG00000213694	S1PR3	protein_coding	-0.808221	5.43409	36.1692	1.80904e-09	6.77244e-08
ENSG00000169136	ATF5	protein_coding	-0.708598	6.84483	36.0351	1.938e-09	7.23234e-08
ENSG00000188643	S100A16	protein_coding	-0.989634	4.00958	35.9771	1.99653e-09	7.42736e-08
ENSG00000125462	C1orf61	protein_coding	2.57185	-0.0727876	35.9426	2.03219e-09	7.53632e-08
ENSG00000133106	EPSTI1	protein_coding	-1.5029	1.56826	35.5567	2.47733e-09	9.15839e-08
ENSG00000163694	RBM47	protein_coding	-1.05198	3.57214	35.5099	2.53761e-09	9.35201e-08
ENSG00000108798	ABI3	protein_coding	0.963208	4.17453	35.304	2.82059e-09	1.03626e-07
ENSG00000111674	ENO2	protein_coding	-1.00941	3.84398	35.2368	2.91959e-09	1.06931e-07
ENSG00000122691	TWIST1	protein_coding	-3.88425	-1.17275	35.1531	3.04779e-09	1.11282e-07
ENSG00000168461	RAB31	protein_coding	-0.695551	6.94242	35.1147	3.10849e-09	1.13149e-07
ENSG00000115594	IL1R1	protein_coding	1.07018	3.49809	35.0771	3.16908e-09	1.15001e-07
ENSG00000123384	LRP1	protein_coding	-0.704353	6.74296	35.0684	3.18331e-09	1.15164e-07
ENSG00000196387	ZNF140	protein_coding	-1.14803	3.02836	35.0317	3.24389e-09	1.16689e-07
ENSG00000198092	TMPRSS11F	protein_coding	2.56418	0.140711	35.0299	3.24687e-09	1.16689e-07
ENSG00000130598	TNNI2	protein_coding	1.78379	0.956732	35.025	3.25505e-09	1.16689e-07
ENSG00000142731	PLK4	protein_coding	0.743387	6.04053	34.9887	3.3163e-09	1.18525e-07
ENSG00000140525	FANCI	protein_coding	0.677892	7.45751	34.9312	3.41568e-09	1.21709e-07
ENSG00000020181	ADGRA2	protein_coding	-0.752925	5.80156	34.6377	3.97148e-09	1.41089e-07
ENSG00000158869	FCER1G	protein_coding	0.66386	7.96018	34.5603	4.13252e-09	1.4637e-07
ENSG00000158104	HPD	protein_coding	1.20821	2.74689	34.4787	4.30944e-09	1.52181e-07
ENSG00000138778	CENPE	protein_coding	0.717757	6.38492	34.4017	4.48328e-09	1.57849e-07
ENSG00000104419	NDRG1	protein_coding	-0.66132	7.88144	34.2693	4.79898e-09	1.68463e-07
ENSG00000104549	SQLE	protein_coding	-0.676026	7.22999	34.2387	4.8751e-09	1.70628e-07
ENSG00000256223	ZNF10	protein_coding	-1.47979	1.63392	34.1847	5.01221e-09	1.7491e-07
ENSG00000111275	ALDH2	protein_coding	0.940448	4.22478	34.1789	5.02703e-09	1.74911e-07
ENSG00000130649	CYP2E1	protein_coding	1.26881	2.45448	34.0744	5.3044e-09	1.84021e-07
ENSG00000140678	ITGAX	protein_coding	-0.668474	7.4431	34.0421	5.39319e-09	1.86554e-07
ENSG00000171051	FPR1	protein_coding	1.19584	3.38831	33.9019	5.79616e-09	1.99908e-07
ENSG00000110031	LPXN	protein_coding	0.640028	8.86116	33.7984	6.11297e-09	2.10222e-07
ENSG00000128594	LRRC4	protein_coding	-1.05787	3.40041	33.7833	6.1606e-09	2.11246e-07
ENSG00000163162	RNF149	protein_coding	-0.725674	6.07541	33.7336	6.31983e-09	2.1608e-07
ENSG00000132530	XAF1	protein_coding	-0.92961	4.22028	33.6433	6.62033e-09	2.25702e-07
ENSG00000196684	HSH2D	protein_coding	0.663558	7.52692	33.5903	6.80302e-09	2.31264e-07
ENSG00000131747	TOP2A	protein_coding	0.635209	9.04922	33.5085	7.09515e-09	2.40503e-07
ENSG00000172716	SLFN11	protein_coding	-0.67234	7.10214	33.4653	7.25459e-09	2.45205e-07
ENSG00000197746	PSAP	protein_coding	-0.642163	8.4862	33.4202	7.42502e-09	2.50251e-07
ENSG00000183019	MCEMP1	protein_coding	-0.785774	5.3457	33.4043	7.48572e-09	2.5158e-07
ENSG00000142405	NLRP12	protein_coding	-0.997615	3.7145	33.385	7.56055e-09	2.53375e-07
ENSG00000157399	ARSE	protein_coding	-2.46738	-0.483681	33.173	8.43152e-09	2.81765e-07
ENSG00000139428	MMAB	protein_coding	-0.737053	5.76954	33.0887	8.80499e-09	2.93417e-07
ENSG00000003987	MTMR7	protein_coding	-1.30697	2.16493	33.025	9.09828e-09	3.02339e-07
ENSG00000135094	SDS	protein_coding	1.80555	0.768896	32.9265	9.57121e-09	3.17164e-07
ENSG00000165821	SALL2	protein_coding	0.943509	4.05729	32.7055	1.07234e-08	3.54352e-07
ENSG00000197506	SLC28A3	protein_coding	-0.70914	6.11693	32.4457	1.22569e-08	4.03896e-07
ENSG00000221869	CEBPD	protein_coding	-0.868837	4.58573	32.4289	1.23634e-08	4.06275e-07
ENSG00000141232	TOB1	protein_coding	0.819575	5.001	32.4212	1.24124e-08	4.06756e-07
ENSG00000170836	PPM1D	protein_coding	0.764182	5.46232	32.4059	1.25108e-08	4.08848e-07
ENSG00000179855	GIPC3	protein_coding	-2.05979	0.0115291	32.2566	1.35095e-08	4.39722e-07
ENSG00000141013	GAS8	protein_coding	-1.26273	2.2691	32.2537	1.35299e-08	4.39722e-07
ENSG00000115129	TP53I3	protein_coding	1.02815	3.57348	32.1467	1.42957e-08	4.63336e-07
ENSG00000175899	A2M	protein_coding	-1.14802	2.73662	32.0967	1.46685e-08	4.74121e-07
ENSG00000160179	ABCG1	protein_coding	-1.04431	3.31196	32.0255	1.52164e-08	4.90491e-07
ENSG00000110446	SLC15A3	protein_coding	-0.885449	4.37526	31.955	1.57788e-08	5.07236e-07
ENSG00000172638	EFEMP2	protein_coding	-1.4658	1.40741	31.8423	1.67209e-08	5.36066e-07
ENSG00000101298	SNPH	protein_coding	2.83403	-0.607186	31.8303	1.68251e-08	5.37949e-07
ENSG00000178695	KCTD12	protein_coding	-0.687458	6.40028	31.8168	1.69423e-08	5.40235e-07
ENSG00000115306	SPTBN1	protein_coding	-0.767087	5.33869	31.8022	1.70702e-08	5.42852e-07
ENSG00000114268	PFKFB4	protein_coding	-0.750673	5.4864	31.7404	1.76217e-08	5.58886e-07
ENSG00000187678	SPRY4	protein_coding	0.873373	4.53495	31.618	1.87681e-08	5.93654e-07
ENSG00000064933	PMS1	protein_coding	-0.778811	5.21612	31.5265	1.96739e-08	6.20646e-07
ENSG00000089693	MLF2	protein_coding	0.656255	7.00971	31.4757	2.01953e-08	6.35399e-07
ENSG00000170627	GTSF1	protein_coding	0.772308	5.27706	31.4167	2.08181e-08	6.53258e-07
ENSG00000116774	OLFML3	protein_coding	1.02078	3.43329	31.3238	2.1839e-08	6.83481e-07
ENSG00000283486	FAM95C	protein_coding	-1.11562	2.82849	31.1643	2.37092e-08	7.40053e-07
ENSG00000104921	FCER2	protein_coding	-0.749126	5.43188	31.1521	2.3858e-08	7.42737e-07
ENSG00000130822	PNCK	protein_coding	-3.04475	-0.493425	31.0317	2.53853e-08	7.88209e-07
ENSG00000244694	PTCHD4	protein_coding	2.54495	0.168415	30.9812	2.60544e-08	8.06869e-07
ENSG00000149243	KLHL35	protein_coding	-1.426	1.5836	30.9754	2.61322e-08	8.07164e-07
ENSG00000121053	EPX	protein_coding	-1.87319	0.306564	30.9698	2.62077e-08	8.07388e-07
ENSG00000148926	ADM	protein_coding	-1.14693	2.62362	30.8168	2.83571e-08	8.71337e-07
ENSG00000026559	KCNG1	protein_coding	-1.97616	0.0279413	30.7223	2.9772e-08	9.12443e-07
ENSG00000170442	KRT86	protein_coding	1.7252	0.784316	30.6762	3.04882e-08	9.31978e-07
ENSG00000114446	IFT57	protein_coding	-0.701907	5.86789	30.5813	3.20163e-08	9.76166e-07
ENSG00000172893	DHCR7	protein_coding	-0.661695	6.61682	30.5351	3.27872e-08	9.95261e-07
ENSG00000108702	CCL1	protein_coding	1.91764	0.512081	30.5338	3.28108e-08	9.95261e-07
ENSG00000137563	GGH	protein_coding	-0.723804	5.60339	30.5272	3.29221e-08	9.96083e-07
ENSG00000242732	RTL5	protein_coding	0.912132	4.04317	30.4126	3.4926e-08	1.05402e-06
ENSG00000160752	FDPS	protein_coding	-0.627351	7.61228	30.3934	3.52729e-08	1.06178e-06
ENSG00000026103	FAS	protein_coding	0.765647	5.2337	30.363	3.58293e-08	1.07579e-06
ENSG00000156509	FBXO43	protein_coding	-1.02506	3.25288	30.343	3.62019e-08	1.08422e-06
ENSG00000132718	SYT11	protein_coding	-0.751828	5.30053	30.2065	3.88405e-08	1.16031e-06
ENSG00000152256	PDK1	protein_coding	-0.69033	5.98505	30.1555	3.98755e-08	1.18823e-06
ENSG00000121064	SCPEP1	protein_coding	0.631306	7.34906	30.1027	4.09751e-08	1.21793e-06
ENSG00000172216	CEBPB	protein_coding	-0.800629	4.885	30.077	4.15225e-08	1.23111e-06
ENSG00000177989	ODF3B	protein_coding	-1.09604	2.80989	30.0614	4.18574e-08	1.23793e-06
ENSG00000133678	TMEM254	protein_coding	-0.89655	4.02862	29.8494	4.66949e-08	1.37756e-06
ENSG00000068323	TFE3	protein_coding	0.710561	5.68497	29.841	4.6897e-08	1.38008e-06
ENSG00000117594	HSD11B1	protein_coding	-0.937014	3.73737	29.7665	4.87329e-08	1.43055e-06
ENSG00000119714	GPR68	protein_coding	0.993315	3.42406	29.652	5.16988e-08	1.51385e-06
ENSG00000101255	TRIB3	protein_coding	-0.652666	6.59571	29.6315	5.2248e-08	1.52616e-06
ENSG00000263001	GTF2I	protein_coding	-0.72105	5.52521	29.6199	5.25625e-08	1.53156e-06
ENSG00000157404	KIT	protein_coding	1.03821	3.18038	29.5627	5.41365e-08	1.57355e-06
ENSG00000154359	LONRF1	protein_coding	-0.800068	4.80394	29.447	5.74663e-08	1.66624e-06
ENSG00000154122	ANKH	protein_coding	0.720393	5.53919	29.4268	5.80704e-08	1.67964e-06
ENSG00000111913	RIPOR2	protein_coding	-0.821029	4.6103	29.3838	5.9371e-08	1.71307e-06
ENSG00000168209	DDIT4	protein_coding	-1.08442	2.78044	29.2343	6.41324e-08	1.84595e-06
ENSG00000163217	BMP10	protein_coding	1.27624	2.07687	29.1592	6.66668e-08	1.91424e-06
ENSG00000140379	BCL2A1	protein_coding	-0.771875	5.01738	29.1519	6.69217e-08	1.91691e-06
ENSG00000140534	TICRR	protein_coding	0.690984	5.80354	29.1152	6.81984e-08	1.94876e-06
ENSG00000205208	C4orf46	protein_coding	-0.733475	5.34196	29.0814	6.94012e-08	1.97835e-06
ENSG00000186470	BTN3A2	protein_coding	-0.657106	6.38084	29.0528	7.0434e-08	2.00297e-06
ENSG00000163462	TRIM46	protein_coding	-1.14131	2.51161	28.9221	7.53491e-08	2.1376e-06
ENSG00000186529	CYP4F3	protein_coding	2.26001	0.06401	28.7089	8.41175e-08	2.38064e-06
ENSG00000127586	CHTF18	protein_coding	0.728536	5.43496	28.7033	8.43618e-08	2.38186e-06
ENSG00000089127	OAS1	protein_coding	-0.885445	3.95463	28.4947	9.3953e-08	2.64634e-06
ENSG00000171004	HS6ST2	protein_coding	-2.40042	-0.540767	28.4462	9.63373e-08	2.70706e-06
ENSG00000172164	SNTB1	protein_coding	-0.632607	6.74119	28.4218	9.75619e-08	2.73497e-06
ENSG00000196611	MMP1	protein_coding	0.895158	3.97209	28.407	9.8309e-08	2.7494e-06
ENSG00000198598	MMP17	protein_coding	-1.04598	2.96695	28.3544	1.01018e-07	2.8185e-06
ENSG00000123342	MMP19	protein_coding	-0.848889	4.20568	28.1805	1.10511e-07	3.0761e-06
ENSG00000138722	MMRN1	protein_coding	0.602511	7.69033	28.082	1.1628e-07	3.22908e-06
ENSG00000118200	CAMSAP2	protein_coding	0.763221	5.01734	28.0611	1.17546e-07	3.2566e-06
ENSG00000196083	IL1RAP	protein_coding	-0.661001	6.06754	27.9901	1.21935e-07	3.37032e-06
ENSG00000163624	CDS1	protein_coding	-2.13208	-0.356106	27.9646	1.23558e-07	3.40721e-06
ENSG00000171724	VAT1L	protein_coding	0.583418	8.73553	27.943	1.24943e-07	3.43739e-06
ENSG00000133639	BTG1	protein_coding	-0.618754	6.95591	27.9142	1.26816e-07	3.48081e-06
ENSG00000112972	HMGCS1	protein_coding	-0.608345	7.29534	27.9089	1.27163e-07	3.48226e-06
ENSG00000168268	NT5DC2	protein_coding	0.627749	6.73754	27.8877	1.28567e-07	3.51155e-06
ENSG00000159788	RGS12	protein_coding	0.719426	5.34802	27.8838	1.28826e-07	3.51155e-06
ENSG00000163406	SLC15A2	protein_coding	-0.71135	5.39741	27.8704	1.29716e-07	3.52769e-06
ENSG00000196220	SRGAP3	protein_coding	1.01585	3.12227	27.727	1.39701e-07	3.78978e-06
ENSG00000196092	PAX5	protein_coding	1.19648	2.20348	27.7229	1.39995e-07	3.78978e-06
ENSG00000186480	INSIG1	protein_coding	-0.580612	8.7292	27.6963	1.41937e-07	3.8336e-06
ENSG00000187772	LIN28B	protein_coding	0.757558	5.00049	27.6832	1.42895e-07	3.85069e-06
ENSG00000130775	THEMIS2	protein_coding	-0.616383	6.91283	27.5437	1.53585e-07	4.12325e-06
ENSG00000173848	NET1	protein_coding	-0.69572	5.51861	27.5372	1.54099e-07	4.12325e-06
ENSG00000171860	C3AR1	protein_coding	-0.966116	3.29843	27.5371	1.54106e-07	4.12325e-06
ENSG00000067064	IDI1	protein_coding	-0.606562	7.19257	27.5334	1.54404e-07	4.12325e-06
ENSG00000173530	TNFRSF10D	protein_coding	0.672293	5.75943	27.3928	1.66051e-07	4.42428e-06
ENSG00000171827	ZNF570	protein_coding	-1.09324	2.54121	27.3779	1.6733e-07	4.44834e-06
ENSG00000073737	DHRS9	protein_coding	-1.06344	2.693	27.3215	1.72284e-07	4.56979e-06
ENSG00000011201	ANOS1	protein_coding	-0.913545	3.62469	27.2784	1.76173e-07	4.66247e-06
ENSG00000188343	FAM92A	protein_coding	-0.852011	4.07761	27.2702	1.76915e-07	4.67014e-06
ENSG00000204186	ZDBF2	protein_coding	-1.40508	1.29846	27.2665	1.77252e-07	4.67014e-06
ENSG00000093072	ADA2	protein_coding	-0.594895	7.5569	27.2352	1.80147e-07	4.73586e-06
ENSG00000131669	NINJ1	protein_coding	0.716373	5.34192	27.2211	1.81472e-07	4.76012e-06
ENSG00000014914	MTMR11	protein_coding	-0.71074	5.31886	27.2039	1.83091e-07	4.78804e-06
ENSG00000115165	CYTIP	protein_coding	-0.661847	5.86198	27.2012	1.83346e-07	4.78804e-06
ENSG00000137265	IRF4	protein_coding	1.94785	0.0989298	27.1843	1.8495e-07	4.81929e-06
ENSG00000152580	IGSF10	protein_coding	0.601023	7.32077	27.175	1.85849e-07	4.83209e-06
ENSG00000065833	ME1	protein_coding	-0.769615	4.78788	27.1446	1.88791e-07	4.8978e-06
ENSG00000057657	PRDM1	protein_coding	0.92905	3.5357	27.1307	1.90157e-07	4.92244e-06
ENSG00000112303	VNN2	protein_coding	-0.956839	3.31022	27.082	1.95003e-07	5.03687e-06
ENSG00000168779	SHOX2	protein_coding	-0.666436	5.76123	27.0288	2.00445e-07	5.15855e-06
ENSG00000180530	NRIP1	protein_coding	0.605196	7.09219	27.0275	2.00586e-07	5.15855e-06
ENSG00000198520	ARMH1	protein_coding	0.63532	6.33734	26.9214	2.11901e-07	5.43771e-06
ENSG00000139433	GLTP	protein_coding	0.728107	5.13788	26.8154	2.23848e-07	5.73186e-06
ENSG00000127507	ADGRE2	protein_coding	0.658973	5.85235	26.7446	2.32204e-07	5.93299e-06
ENSG00000025708	TYMP	protein_coding	-0.670855	5.66801	26.695	2.38234e-07	6.06312e-06
ENSG00000154059	IMPACT	protein_coding	-0.749073	4.92335	26.6943	2.38322e-07	6.06312e-06
ENSG00000185215	TNFAIP2	protein_coding	0.605889	6.96643	26.6667	2.41758e-07	6.13348e-06
ENSG00000186810	CXCR3	protein_coding	1.22191	2.04912	26.6637	2.42125e-07	6.13348e-06
ENSG00000166845	C18orf54	protein_coding	-0.824246	4.2152	26.6446	2.44537e-07	6.18134e-06
ENSG00000161509	GRIN2C	protein_coding	1.28359	1.76179	26.6239	2.47171e-07	6.23461e-06
ENSG00000185088	RPS27L	protein_coding	0.583346	7.80598	26.5715	2.5396e-07	6.39223e-06
ENSG00000167232	ZNF91	protein_coding	-2.067	-0.319195	26.5511	2.56661e-07	6.44651e-06
ENSG00000118515	SGK1	protein_coding	-0.831894	4.20519	26.5434	2.57686e-07	6.45853e-06
ENSG00000134574	DDB2	protein_coding	0.601962	7.0052	26.5232	2.60389e-07	6.50106e-06
ENSG00000205189	ZBTB10	protein_coding	-0.839071	4.08646	26.5225	2.60482e-07	6.50106e-06
ENSG00000145545	SRD5A1	protein_coding	0.819037	4.33621	26.4784	2.66495e-07	6.6308e-06
ENSG00000172167	MTBP	protein_coding	-0.769491	4.71635	26.4762	2.66802e-07	6.6308e-06
ENSG00000266094	RASSF5	protein_coding	0.583602	7.70739	26.4263	2.73785e-07	6.79009e-06
ENSG00000146243	IRAK1BP1	protein_coding	-1.00617	2.98956	26.3833	2.79944e-07	6.92833e-06
ENSG00000092621	PHGDH	protein_coding	-0.596517	7.11998	26.3652	2.82581e-07	6.97899e-06
ENSG00000109819	PPARGC1A	protein_coding	-1.62619	0.478963	26.3591	2.83473e-07	6.98644e-06
ENSG00000004777	ARHGAP33	protein_coding	0.747993	4.99743	26.3269	2.88248e-07	7.08935e-06
ENSG00000197249	SERPINA1	protein_coding	-1.16457	2.10899	26.2954	2.92986e-07	7.19093e-06
ENSG00000196787	HIST1H2AG	protein_coding	-1.31801	1.43797	26.2621	2.98081e-07	7.28927e-06
ENSG00000125845	BMP2	protein_coding	0.73797	4.9984	26.2612	2.98226e-07	7.28927e-06
ENSG00000123473	STIL	protein_coding	0.643284	6.02482	26.2484	3.00202e-07	7.32246e-06
ENSG00000123080	CDKN2C	protein_coding	-0.631929	6.21827	26.2203	3.0461e-07	7.41468e-06
ENSG00000166501	PRKCB	protein_coding	-0.606352	6.74076	26.1282	3.1949e-07	7.76091e-06
ENSG00000168243	GNG4	protein_coding	1.91664	0.0509642	26.0624	3.30554e-07	8.01322e-06
ENSG00000162144	CYB561A3	protein_coding	0.630092	6.25267	26.0558	3.31692e-07	8.02438e-06
ENSG00000185100	ADSSL1	protein_coding	-1.25925	1.63765	26.0497	3.32738e-07	8.03325e-06
ENSG00000141837	CACNA1A	protein_coding	0.622654	6.3807	25.9999	3.41442e-07	8.22659e-06
ENSG00000146410	MTFR2	protein_coding	-0.662121	5.65896	25.9719	3.46429e-07	8.32156e-06
ENSG00000138658	ZGRF1	protein_coding	0.719974	5.12134	25.9699	3.4679e-07	8.32156e-06
ENSG00000172243	CLEC7A	protein_coding	-0.992434	2.95783	25.9337	3.53343e-07	8.46163e-06
ENSG00000144852	NR1I2	protein_coding	-1.36521	1.3119	25.9162	3.5656e-07	8.52142e-06
ENSG00000011105	TSPAN9	protein_coding	0.868365	3.8181	25.8884	3.61729e-07	8.62754e-06
ENSG00000198865	CCDC152	protein_coding	-1.1919	1.99283	25.8816	3.63005e-07	8.64055e-06
ENSG00000135451	TROAP	protein_coding	0.624425	6.31657	25.8441	3.70135e-07	8.79255e-06
ENSG00000226479	TMEM185B	protein_coding	-0.645963	5.83357	25.7841	3.81828e-07	9.04254e-06
ENSG00000262406	MMP12	protein_coding	1.50368	1.13833	25.7823	3.82187e-07	9.04254e-06
ENSG00000149418	ST14	protein_coding	0.622757	6.3225	25.7313	3.92406e-07	9.2658e-06
ENSG00000135069	PSAT1	protein_coding	-0.594124	6.94791	25.6919	4.00499e-07	9.43805e-06
ENSG00000051341	POLQ	protein_coding	0.658325	5.69304	25.6348	4.12538e-07	9.70243e-06
ENSG00000131981	LGALS3	protein_coding	-0.778462	4.47441	25.6192	4.15872e-07	9.75861e-06
ENSG00000137807	KIF23	protein_coding	0.616457	6.40405	25.616	4.16576e-07	9.75861e-06
ENSG00000065989	PDE4A	protein_coding	-0.920934	3.37066	25.6079	4.18333e-07	9.78039e-06
ENSG00000105835	NAMPT	protein_coding	-0.596344	6.83471	25.5462	4.31914e-07	1.0078e-05
ENSG00000267041	ZNF850	protein_coding	-0.929521	3.31535	25.5308	4.35385e-07	1.01232e-05
ENSG00000198915	RASGEF1A	protein_coding	1.26539	1.7813	25.53	4.35563e-07	1.01232e-05
ENSG00000164211	STARD4	protein_coding	-0.60793	6.53583	25.5083	4.40494e-07	1.02177e-05
ENSG00000120539	MASTL	protein_coding	-0.669375	5.50068	25.4159	4.62102e-07	1.0698e-05
ENSG00000164237	CMBL	protein_coding	0.785182	4.40517	25.3444	4.79552e-07	1.10803e-05
ENSG00000155189	AGPAT5	protein_coding	-0.597363	6.73403	25.3158	4.86701e-07	1.12235e-05
ENSG00000221890	NPTXR	protein_coding	0.697183	5.23488	25.2526	5.02925e-07	1.15751e-05
ENSG00000159618	ADGRG5	protein_coding	0.640788	5.82493	25.1819	5.21697e-07	1.19838e-05
ENSG00000175602	CCDC85B	protein_coding	-0.949076	3.22409	25.1637	5.26629e-07	1.20737e-05
ENSG00000169083	AR	protein_coding	-1.54363	0.619707	25.125	5.37324e-07	1.22847e-05
ENSG00000065548	ZC3H15	protein_coding	-0.601667	6.57099	25.1229	5.37908e-07	1.22847e-05
ENSG00000132185	FCRLA	protein_coding	-2.15834	-0.642418	25.1187	5.39064e-07	1.22873e-05
ENSG00000120594	PLXDC2	protein_coding	-0.976876	3.00259	25.0895	5.47312e-07	1.24513e-05
ENSG00000130528	HRC	protein_coding	-0.945479	3.15242	25.03	5.64459e-07	1.28168e-05
ENSG00000107551	RASSF4	protein_coding	-0.563365	7.91176	24.9613	5.84936e-07	1.32563e-05
ENSG00000120437	ACAT2	protein_coding	-0.605853	6.4348	24.9496	5.88475e-07	1.3311e-05
ENSG00000143545	RAB13	protein_coding	-0.976252	2.93356	24.9416	5.90927e-07	1.3341e-05
ENSG00000162430	SELENON	protein_coding	-0.603056	6.49762	24.8853	6.08448e-07	1.37104e-05
ENSG00000080546	SESN1	protein_coding	0.614166	6.2511	24.8159	6.30766e-07	1.41862e-05
ENSG00000112697	TMEM30A	protein_coding	-0.550212	8.6666	24.7992	6.36238e-07	1.42649e-05
ENSG00000170191	NANP	protein_coding	-0.988375	2.84038	24.7979	6.36673e-07	1.42649e-05
ENSG00000139880	CDH24	protein_coding	0.994343	2.91625	24.6971	6.70865e-07	1.50025e-05
ENSG00000112715	VEGFA	protein_coding	-0.599728	6.49352	24.678	6.77528e-07	1.51229e-05
ENSG00000235750	KIAA0040	protein_coding	0.789735	4.28173	24.6393	6.91277e-07	1.54008e-05
ENSG00000130821	SLC6A8	protein_coding	-0.941051	3.16431	24.6334	6.93392e-07	1.54189e-05
ENSG00000050438	SLC4A8	protein_coding	-0.783087	4.28155	24.5725	7.15675e-07	1.58845e-05
ENSG00000107331	ABCA2	protein_coding	0.61829	6.14534	24.5486	7.24573e-07	1.60519e-05
ENSG00000266714	MYO15B	protein_coding	-0.710611	4.99054	24.5252	7.33445e-07	1.62123e-05
ENSG00000196730	DAPK1	protein_coding	0.629664	5.89379	24.5223	7.34557e-07	1.62123e-05
ENSG00000117586	TNFSF4	protein_coding	0.912141	3.35414	24.5057	7.40893e-07	1.63217e-05
ENSG00000143119	CD53	protein_coding	0.555562	8.06553	24.4775	7.51811e-07	1.65314e-05
ENSG00000137575	SDCBP	protein_coding	-0.556704	7.96347	24.4492	7.62944e-07	1.67451e-05
ENSG00000164252	AGGF1	protein_coding	-0.83973	3.79316	24.418	7.75418e-07	1.69591e-05
ENSG00000107566	ERLIN1	protein_coding	-0.554374	8.08332	24.4176	7.75562e-07	1.69591e-05
ENSG00000168995	SIGLEC7	protein_coding	-1.24125	1.60313	24.3499	8.03312e-07	1.75335e-05
ENSG00000118193	KIF14	protein_coding	0.580976	6.90356	24.3324	8.10657e-07	1.76613e-05
ENSG00000182287	AP1S2	protein_coding	-0.580185	6.86981	24.2972	8.25604e-07	1.79539e-05
ENSG00000175130	MARCKSL1	protein_coding	0.57307	7.09395	24.2823	8.31989e-07	1.80595e-05
ENSG00000177409	SAMD9L	protein_coding	-0.700437	5.03299	24.1975	8.69468e-07	1.88385e-05
ENSG00000121797	CCRL2	protein_coding	-0.957528	2.97694	24.1788	8.77956e-07	1.89876e-05
ENSG00000204856	FAM216A	protein_coding	-0.65287	5.48391	24.0859	9.21333e-07	1.98894e-05
ENSG00000067167	TRAM1	protein_coding	-0.587062	6.60807	24.0391	9.44014e-07	2.03419e-05
ENSG00000197461	PDGFA	protein_coding	1.40002	1.0829	24.0013	9.62694e-07	2.07067e-05
ENSG00000137812	KNL1	protein_coding	0.621097	5.93207	23.9717	9.77617e-07	2.09895e-05
ENSG00000144677	CTDSPL	protein_coding	-1.15898	1.84821	23.9555	9.85882e-07	2.11286e-05
ENSG00000013573	DDX11	protein_coding	0.592393	6.51311	23.9415	9.93069e-07	2.12441e-05
ENSG00000128422	KRT17	protein_coding	1.49157	0.990953	23.9292	9.99429e-07	2.13416e-05
ENSG00000110324	IL10RA	protein_coding	-0.653292	5.46206	23.9191	1.00472e-06	2.13992e-05
ENSG00000172264	MACROD2	protein_coding	-2.27599	-0.755222	23.9171	1.00574e-06	2.13992e-05
ENSG00000183696	UPP1	protein_coding	-0.862933	3.53326	23.8303	1.05213e-06	2.23459e-05
ENSG00000139269	INHBE	protein_coding	-1.98418	-0.494037	23.813	1.06165e-06	2.25077e-05
ENSG00000078237	TIGAR	protein_coding	0.989049	3.08625	23.7292	1.10888e-06	2.3467e-05
ENSG00000121211	MND1	protein_coding	-0.696158	5.00861	23.7191	1.11469e-06	2.35479e-05
ENSG00000130147	SH3BP4	protein_coding	0.948401	3.04756	23.7023	1.12447e-06	2.37121e-05
ENSG00000161551	ZNF577	protein_coding	-1.10389	2.07507	23.618	1.17481e-06	2.47296e-05
ENSG00000147364	FBXO25	protein_coding	-0.68442	5.09769	23.5732	1.20252e-06	2.52679e-05
ENSG00000124839	RAB17	protein_coding	-1.65747	0.118826	23.5137	1.24028e-06	2.59907e-05
ENSG00000120889	TNFRSF10B	protein_coding	0.545286	8.01873	23.5121	1.24131e-06	2.59907e-05
ENSG00000154760	SLFN13	protein_coding	-0.786522	4.0865	23.4512	1.2812e-06	2.67784e-05
ENSG00000026025	VIM	protein_coding	-0.530639	8.91993	23.3741	1.33362e-06	2.78249e-05
ENSG00000186862	PDZD7	protein_coding	-0.723835	4.67427	23.2957	1.38909e-06	2.89312e-05
ENSG00000244509	APOBEC3C	protein_coding	0.569971	6.81926	23.2808	1.39989e-06	2.91048e-05
ENSG00000197747	S100A10	protein_coding	-0.630676	5.59848	23.1998	1.46013e-06	3.03042e-05
ENSG00000162783	IER5	protein_coding	0.591348	6.28515	23.1706	1.48244e-06	3.07132e-05
ENSG00000163993	S100P	protein_coding	-0.632184	5.57252	23.1256	1.51756e-06	3.13858e-05
ENSG00000173041	ZNF680	protein_coding	-0.82468	3.7379	23.115	1.52596e-06	3.15045e-05
ENSG00000130024	PHF10	protein_coding	-0.550116	7.43782	23.1116	1.52868e-06	3.15056e-05
ENSG00000119397	CNTRL	protein_coding	0.549856	7.47953	23.0871	1.54825e-06	3.18536e-05
ENSG00000111321	LTBR	protein_coding	0.584209	6.41699	23.0164	1.60621e-06	3.29887e-05
ENSG00000152076	CCDC74B	protein_coding	-2.45187	-1.13184	22.9697	1.64573e-06	3.37416e-05
ENSG00000162734	PEA15	protein_coding	0.548979	7.42987	22.9569	1.65677e-06	3.39094e-05
ENSG00000121858	TNFSF10	protein_coding	-0.599818	6.00709	22.9078	1.69958e-06	3.47255e-05
ENSG00000164733	CTSB	protein_coding	-0.548589	7.40121	22.9039	1.70309e-06	3.47372e-05
ENSG00000187735	TCEA1	protein_coding	-0.582788	6.38859	22.8853	1.71963e-06	3.50141e-05
ENSG00000196562	SULF2	protein_coding	-0.818878	3.73029	22.8647	1.73817e-06	3.53309e-05
ENSG00000018280	SLC11A1	protein_coding	-0.655943	5.27508	22.8466	1.7546e-06	3.56037e-05
ENSG00000122122	SASH3	protein_coding	0.553307	7.1272	22.7176	1.87642e-06	3.80104e-05
ENSG00000168306	ACOX2	protein_coding	-0.903454	3.13018	22.6982	1.89541e-06	3.83293e-05
ENSG00000228716	DHFR	protein_coding	-0.577241	6.42449	22.6252	1.96882e-06	3.97461e-05
ENSG00000109805	NCAPG	protein_coding	0.567116	6.67017	22.5742	2.02177e-06	4.06763e-05
ENSG00000060237	WNK1	protein_coding	0.529515	8.3466	22.5718	2.02431e-06	4.06763e-05
ENSG00000128564	VGF	protein_coding	-2.02766	-0.536003	22.571	2.02522e-06	4.06763e-05
ENSG00000180938	ZNF572	protein_coding	-1.93668	-0.517979	22.5558	2.04129e-06	4.09296e-05
ENSG00000161671	EMC10	protein_coding	-0.606629	5.75362	22.3333	2.29193e-06	4.58774e-05
ENSG00000074706	IPCEF1	protein_coding	-0.627641	5.49364	22.3277	2.29868e-06	4.59348e-05
ENSG00000121067	SPOP	protein_coding	-0.552178	6.9792	22.3217	2.3059e-06	4.60014e-05
ENSG00000139044	B4GALNT3	protein_coding	0.651395	5.27293	22.3095	2.32057e-06	4.62161e-05
ENSG00000188282	RUFY4	protein_coding	-0.66361	5.11246	22.2418	2.40388e-06	4.77949e-05
ENSG00000180902	D2HGDH	protein_coding	-0.722724	4.49205	22.1713	2.49377e-06	4.94988e-05
ENSG00000119411	BSPRY	protein_coding	-0.830468	3.5404	22.1578	2.51132e-06	4.97636e-05
ENSG00000143401	ANP32E	protein_coding	-0.525519	8.2763	22.1485	2.52347e-06	4.99207e-05
ENSG00000196664	TLR7	protein_coding	0.911911	3.07314	22.1262	2.55299e-06	5.04205e-05
ENSG00000119227	PIGZ	protein_coding	-1.17939	1.55096	22.1026	2.58457e-06	5.09591e-05
ENSG00000129173	E2F8	protein_coding	0.621636	5.56288	22.0813	2.61342e-06	5.14422e-05
ENSG00000066294	CD84	protein_coding	-0.623802	5.50509	22.0632	2.63826e-06	5.18449e-05
ENSG00000165424	ZCCHC24	protein_coding	0.849243	3.47961	22.0382	2.67284e-06	5.24373e-05
ENSG00000162896	PIGR	protein_coding	-1.05635	2.1118	22.012	2.70952e-06	5.30688e-05
ENSG00000181467	RAP2B	protein_coding	-0.550447	6.90628	21.9971	2.73068e-06	5.33949e-05
ENSG00000146278	PNRC1	protein_coding	-0.557106	6.70033	21.9843	2.74891e-06	5.36628e-05
ENSG00000140284	SLC27A2	protein_coding	-0.760225	4.08705	21.95	2.79847e-06	5.44759e-05
ENSG00000090612	ZNF268	protein_coding	-0.727736	4.39632	21.9491	2.79977e-06	5.44759e-05
ENSG00000012048	BRCA1	protein_coding	0.547358	7.00906	21.9162	2.84822e-06	5.53274e-05
ENSG00000122641	INHBA	protein_coding	-2.00655	-0.682022	21.8941	2.88124e-06	5.58771e-05
ENSG00000081320	STK17B	protein_coding	-0.53524	7.4237	21.8482	2.95086e-06	5.71336e-05
ENSG00000158714	SLAMF8	protein_coding	1.24991	1.39585	21.7633	3.08443e-06	5.96222e-05
ENSG00000102760	RGCC	protein_coding	-0.877357	3.15944	21.7084	3.17392e-06	6.1252e-05
ENSG00000137767	SQOR	protein_coding	-0.535903	7.29115	21.6961	3.19441e-06	6.15471e-05
ENSG00000161544	CYGB	protein_coding	1.57959	0.411092	21.6775	3.22551e-06	6.20451e-05
ENSG00000283787	PRR33	protein_coding	1.13524	1.79372	21.6269	3.31182e-06	6.3602e-05
ENSG00000183621	ZNF438	protein_coding	-0.621916	5.44203	21.6103	3.34053e-06	6.40495e-05
ENSG00000101160	CTSZ	protein_coding	-0.508779	8.95873	21.5413	3.46281e-06	6.62865e-05
ENSG00000144857	BOC	protein_coding	1.80584	-0.0890398	21.5293	3.48467e-06	6.65972e-05
ENSG00000140451	PIF1	protein_coding	0.721768	4.44779	21.5234	3.49537e-06	6.6694e-05
ENSG00000133687	TMTC1	protein_coding	-0.743607	4.17868	21.5139	3.5128e-06	6.69186e-05
ENSG00000131080	EDA2R	protein_coding	0.626512	5.39684	21.5096	3.52066e-06	6.69605e-05
ENSG00000171791	BCL2	protein_coding	0.536931	7.18051	21.4912	3.55453e-06	6.74962e-05
ENSG00000123485	HJURP	protein_coding	0.576416	6.12482	21.4178	3.69318e-06	7.00165e-05
ENSG00000124780	KCNK17	protein_coding	1.17552	1.63419	21.3969	3.73381e-06	7.06736e-05
ENSG00000073803	MAP3K13	protein_coding	-0.709537	4.47572	21.3329	3.86042e-06	7.29533e-05
ENSG00000073792	IGF2BP2	protein_coding	-2.0817	-0.735029	21.325	3.87641e-06	7.31386e-05
ENSG00000182010	RTKN2	protein_coding	1.5965	0.326561	21.3209	3.88476e-06	7.31795e-05
ENSG00000197299	BLM	protein_coding	0.585651	5.88011	21.3009	3.92554e-06	7.38301e-05
ENSG00000187741	FANCA	protein_coding	0.564495	6.38521	21.2613	4.00745e-06	7.5251e-05
ENSG00000147789	ZNF7	protein_coding	-0.676512	4.80816	21.1604	4.22398e-06	7.91913e-05
ENSG00000085117	CD82	protein_coding	-0.564128	6.28827	21.1492	4.24884e-06	7.95313e-05
ENSG00000167508	MVD	protein_coding	-0.627557	5.2981	21.137	4.27582e-06	7.99098e-05
ENSG00000147649	MTDH	protein_coding	-0.515793	8.06449	21.1264	4.29971e-06	8.02296e-05
ENSG00000161791	FMNL3	protein_coding	0.551233	6.57513	21.0526	4.46857e-06	8.30814e-05
ENSG00000172819	RARG	protein_coding	0.887396	3.08054	21.0515	4.47107e-06	8.30814e-05
ENSG00000177575	CD163	protein_coding	-1.02196	2.35492	21.0504	4.47362e-06	8.30814e-05
ENSG00000067182	TNFRSF1A	protein_coding	0.530869	7.16874	21.0332	4.51394e-06	8.3699e-05
ENSG00000189057	FAM111B	protein_coding	0.871982	3.15674	21.0082	4.57311e-06	8.46633e-05
ENSG00000171105	INSR	protein_coding	-0.636084	5.19056	20.9815	4.63747e-06	8.57208e-05
ENSG00000104613	INTS10	protein_coding	-0.538308	6.86169	20.9285	4.76756e-06	8.79879e-05
ENSG00000162636	FAM102B	protein_coding	-0.577101	5.92141	20.8789	4.89243e-06	9.01517e-05
ENSG00000160588	MPZL3	protein_coding	0.744402	4.09513	20.8687	4.91872e-06	9.04952e-05
ENSG00000255587	RAB44	protein_coding	-0.526294	7.267	20.8516	4.96266e-06	9.11619e-05
ENSG00000167880	EVPL	protein_coding	0.973655	2.52919	20.8312	5.0159e-06	9.1997e-05
ENSG00000138413	IDH1	protein_coding	-0.531353	7.03052	20.8008	5.09609e-06	9.33231e-05
ENSG00000120699	EXOSC8	protein_coding	-0.559358	6.2813	20.7975	5.10493e-06	9.33405e-05
ENSG00000189042	ZNF567	protein_coding	-0.895638	2.91092	20.7878	5.13097e-06	9.3672e-05
ENSG00000152766	ANKRD22	protein_coding	-0.636745	5.1447	20.7245	5.30343e-06	9.66407e-05
ENSG00000059377	TBXAS1	protein_coding	0.603567	5.52803	20.7221	5.30993e-06	9.66407e-05
ENSG00000090530	P3H2	protein_coding	-1.69125	-0.198833	20.7085	5.34782e-06	9.71807e-05
ENSG00000172379	ARNT2	protein_coding	-1.51899	0.189205	20.6881	5.40496e-06	9.80685e-05
ENSG00000106070	GRB10	protein_coding	-0.603357	5.51462	20.682	5.42241e-06	9.82344e-05
ENSG00000124126	PREX1	protein_coding	0.514147	7.84484	20.6734	5.44661e-06	9.8522e-05
ENSG00000263513	FAM72C	protein_coding	-1.01786	2.14635	20.646	5.52522e-06	9.97914e-05
ENSG00000196352	CD55	protein_coding	-0.504954	8.39965	20.6364	5.55299e-06	0.00010014
ENSG00000146592	CREB5	protein_coding	-0.911954	2.82724	20.6303	5.57077e-06	0.000100257
ENSG00000141447	OSBPL1A	protein_coding	-0.62454	5.25363	20.6283	5.57644e-06	0.000100257
ENSG00000139289	PHLDA1	protein_coding	-0.846978	3.219	20.618	5.60664e-06	0.000100647
ENSG00000112984	KIF20A	protein_coding	0.56698	6.08348	20.6043	5.64693e-06	0.000101217
ENSG00000184524	CEND1	protein_coding	-2.16192	-0.999135	20.5948	5.67514e-06	0.000101569
ENSG00000073464	CLCN4	protein_coding	0.981021	2.43167	20.5487	5.81329e-06	0.000103884
ENSG00000152784	PRDM8	protein_coding	-0.755786	3.89987	20.5452	5.82408e-06	0.00010392
ENSG00000112299	VNN1	protein_coding	-0.781792	3.71136	20.4863	6.00585e-06	0.000107002
ENSG00000163947	ARHGEF3	protein_coding	0.533431	6.84461	20.4653	6.07207e-06	0.000108019
ENSG00000169246	NPIPB3	protein_coding	-0.934108	2.60591	20.436	6.16586e-06	0.000109523
ENSG00000134954	ETS1	protein_coding	-0.719471	4.2078	20.3356	6.49796e-06	0.000115237
ENSG00000113966	ARL6	protein_coding	-1.07358	1.81515	20.3329	6.50706e-06	0.000115237
ENSG00000164442	CITED2	protein_coding	-0.519292	7.26457	20.325	6.53397e-06	0.000115408
ENSG00000203989	RHOXF2B	protein_coding	-1.01521	2.13108	20.3244	6.53619e-06	0.000115408
ENSG00000143476	DTL	protein_coding	0.524538	7.044	20.2426	6.82179e-06	0.000120271
ENSG00000107104	KANK1	protein_coding	0.56531	5.9981	20.1963	6.98896e-06	0.00012297
ENSG00000106665	CLIP2	protein_coding	0.71097	4.32118	20.1944	6.99568e-06	0.00012297
ENSG00000124233	SEMG1	protein_coding	-0.922119	2.62694	20.1622	7.11448e-06	0.000124873
ENSG00000163818	LZTFL1	protein_coding	-0.673225	4.6458	20.1084	7.31732e-06	0.000128243
ENSG00000106799	TGFBR1	protein_coding	-0.505863	7.90066	20.104	7.33412e-06	0.000128347
ENSG00000166908	PIP4K2C	protein_coding	0.599205	5.46533	20.095	7.36908e-06	0.000128768
ENSG00000187498	COL4A1	protein_coding	-0.851415	3.14045	20.0899	7.3885e-06	0.000128917
ENSG00000121742	GJB6	protein_coding	1.79036	-0.207377	20.0723	7.45696e-06	0.00012992
ENSG00000135631	RAB11FIP5	protein_coding	-1.06465	1.79655	19.9994	7.74659e-06	0.000134574
ENSG00000140931	CMTM3	protein_coding	0.512868	7.39208	19.9994	7.7468e-06	0.000134574
ENSG00000079459	FDFT1	protein_coding	-0.494935	8.54715	19.9859	7.80143e-06	0.000135324
ENSG00000004809	SLC22A16	protein_coding	-0.662215	4.74599	19.8652	8.30992e-06	0.000143933
ENSG00000166669	ATF7IP2	protein_coding	-0.714587	4.16025	19.8005	8.59615e-06	0.000148516
ENSG00000205592	MUC19	protein_coding	-0.840312	3.16318	19.7997	8.59962e-06	0.000148516
ENSG00000167767	KRT80	protein_coding	0.923687	2.62764	19.7888	8.64878e-06	0.000149147
ENSG00000072571	HMMR	protein_coding	-0.548997	6.22155	19.7837	8.67204e-06	0.000149331
ENSG00000149573	MPZL2	protein_coding	1.39382	0.742616	19.7767	8.70363e-06	0.000149657
ENSG00000109674	NEIL3	protein_coding	-0.602611	5.35179	19.76	8.77999e-06	0.000150751
ENSG00000147416	ATP6V1B2	protein_coding	-0.490595	8.62117	19.7046	9.03825e-06	0.00015496
ENSG00000152463	OLAH	protein_coding	-0.871149	2.88789	19.6835	9.13866e-06	0.000156455
ENSG00000135404	CD63	protein_coding	0.486489	8.91918	19.6582	9.26038e-06	0.00015831
ENSG00000139572	GPR84	protein_coding	0.5334	6.58278	19.6467	9.31664e-06	0.000158821
ENSG00000010318	PHF7	protein_coding	-0.716271	4.12131	19.6465	9.31716e-06	0.000158821
ENSG00000186073	C15orf41	protein_coding	-0.670999	4.58042	19.6365	9.36621e-06	0.000159428
ENSG00000140545	MFGE8	protein_coding	1.05991	1.88249	19.6229	9.4332e-06	0.000160337
ENSG00000171659	GPR34	protein_coding	-0.924537	2.52683	19.6164	9.4651e-06	0.000160649
ENSG00000026036	RTEL1-TNFRSF6B	protein_coding	1.0464	2.10398	19.5852	9.62098e-06	0.000163061
ENSG00000163918	RFC4	protein_coding	-0.518345	6.92478	19.5605	9.7463e-06	0.000164948
ENSG00000132541	RIDA	protein_coding	-0.719762	4.05117	19.5072	1.00222e-05	0.000169374
ENSG00000079263	SP140	protein_coding	-0.888405	2.7627	19.4976	1.00727e-05	0.000169986
ENSG00000269404	SPIB	protein_coding	1.06194	1.86016	19.4493	1.03305e-05	0.000174089
ENSG00000019991	HGF	protein_coding	-0.820217	3.26054	19.4264	1.04553e-05	0.000175941
ENSG00000058453	CROCC	protein_coding	-0.895826	2.7166	19.3973	1.06159e-05	0.000178389
ENSG00000164306	PRIMPOL	protein_coding	-0.736081	3.88444	19.3458	1.0906e-05	0.000183004
ENSG00000204161	TMEM273	protein_coding	-0.860101	2.92298	19.3369	1.09571e-05	0.000183601
ENSG00000196636	SDHAF3	protein_coding	-0.726249	3.95931	19.3218	1.1044e-05	0.000184796
ENSG00000136492	BRIP1	protein_coding	0.652871	4.77262	19.3101	1.11115e-05	0.000185662
ENSG00000170571	EMB	protein_coding	-0.485176	8.60968	19.2453	1.14954e-05	0.000191473
ENSG00000171992	SYNPO	protein_coding	0.923815	2.59328	19.2436	1.15057e-05	0.000191473
ENSG00000115828	QPCT	protein_coding	-0.845626	3.04287	19.2432	1.15078e-05	0.000191473
ENSG00000112053	SLC26A8	protein_coding	-0.717772	4.03336	19.2368	1.15465e-05	0.000191847
ENSG00000196639	HRH1	protein_coding	-0.768597	3.5762	19.2113	1.17017e-05	0.000194153
ENSG00000180071	ANKRD18A	protein_coding	-0.856587	2.9569	19.197	1.17897e-05	0.000195339
ENSG00000117500	TMED5	protein_coding	-0.534236	6.35732	19.1661	1.19819e-05	0.000198247
ENSG00000187840	EIF4EBP1	protein_coding	-0.532829	6.39025	19.1624	1.20057e-05	0.000198362
ENSG00000162894	FCMR	protein_coding	-0.567134	5.6687	19.1328	1.21933e-05	0.000201181
ENSG00000163563	MNDA	protein_coding	-0.498797	7.512	19.1262	1.22356e-05	0.000201598
ENSG00000169139	UBE2V2	protein_coding	-0.517221	6.76914	19.1114	1.23303e-05	0.000202875
ENSG00000183762	KREMEN1	protein_coding	0.742555	3.82895	19.1083	1.23509e-05	0.000202932
ENSG00000128165	ADM2	protein_coding	-1.18102	1.19318	19.0692	1.26066e-05	0.000206846
ENSG00000182544	MFSD5	protein_coding	0.542805	6.13142	19.0652	1.26329e-05	0.00020699
ENSG00000130005	GAMT	protein_coding	-0.793411	3.36649	19.0528	1.27148e-05	0.000208045
ENSG00000197965	MPZL1	protein_coding	0.725256	3.97996	19.0487	1.27425e-05	0.00020821
ENSG00000136156	ITM2B	protein_coding	-0.499087	7.43645	19.0311	1.28608e-05	0.000209854
ENSG00000076003	MCM6	protein_coding	0.486838	8.25377	19.0192	1.29408e-05	0.000210868
ENSG00000112576	CCND3	protein_coding	0.473306	9.34762	18.9885	1.31507e-05	0.000213993
ENSG00000101425	BPI	protein_coding	-0.686977	4.27456	18.964	1.33207e-05	0.000216462
ENSG00000153885	KCTD15	protein_coding	-0.647979	4.75073	18.9537	1.33927e-05	0.000217333
ENSG00000168172	HOOK3	protein_coding	-0.540222	6.13089	18.9438	1.34628e-05	0.000218171
ENSG00000117115	PADI2	protein_coding	0.543325	6.06429	18.9291	1.35667e-05	0.000219555
ENSG00000181690	PLAG1	protein_coding	-1.37956	0.430648	18.9248	1.35971e-05	0.0002196
ENSG00000121933	TMIGD3	protein_coding	-1.23253	0.915754	18.9235	1.36066e-05	0.0002196
ENSG00000155792	DEPTOR	protein_coding	-1.04189	1.76538	18.9198	1.36331e-05	0.000219694
ENSG00000124145	SDC4	protein_coding	-0.706858	4.07679	18.9175	1.36496e-05	0.000219694
ENSG00000004468	CD38	protein_coding	-0.528414	6.40216	18.9146	1.367e-05	0.000219723
ENSG00000159753	CARMIL2	protein_coding	1.58656	0.0625899	18.861	1.40599e-05	0.000225683
ENSG00000213186	TRIM59	protein_coding	-0.585952	5.38292	18.828	1.43051e-05	0.000229308
ENSG00000023287	RB1CC1	protein_coding	-0.52827	6.36105	18.781	1.46623e-05	0.000234715
ENSG00000120526	NUDCD1	protein_coding	-0.559742	5.67695	18.7047	1.52607e-05	0.000243965
ENSG00000250510	GPR162	protein_coding	0.779105	3.46018	18.6916	1.53661e-05	0.000245318
ENSG00000101194	SLC17A9	protein_coding	0.538517	6.19016	18.6837	1.54292e-05	0.000245994
ENSG00000163932	PRKCD	protein_coding	0.475127	8.82593	18.6609	1.56149e-05	0.00024862
ENSG00000197016	ZNF470	protein_coding	-0.979526	2.13332	18.6108	1.60308e-05	0.000254877
ENSG00000137819	PAQR5	protein_coding	-1.45964	0.193896	18.6084	1.6051e-05	0.000254877
ENSG00000164484	TMEM200A	protein_coding	1.37764	0.554687	18.5905	1.62028e-05	0.000256942
ENSG00000136960	ENPP2	protein_coding	-1.43841	0.177014	18.5841	1.6257e-05	0.000257456
ENSG00000139737	SLAIN1	protein_coding	-0.644394	4.69846	18.5797	1.62947e-05	0.00025771
ENSG00000122952	ZWINT	protein_coding	0.490066	7.59209	18.5395	1.66422e-05	0.000262853
ENSG00000178718	RPP25	protein_coding	-0.669861	4.38579	18.5148	1.68588e-05	0.00026592
ENSG00000175866	BAIAP2	protein_coding	-0.968586	2.11785	18.5049	1.6947e-05	0.000266955
ENSG00000110042	DTX4	protein_coding	0.629623	4.86986	18.4824	1.71483e-05	0.000269766
ENSG00000135605	TEC	protein_coding	-0.573753	5.44686	18.4492	1.74495e-05	0.00027414
ENSG00000158477	CD1A	protein_coding	1.62572	-0.0434664	18.446	1.74791e-05	0.000274242
ENSG00000059804	SLC2A3	protein_coding	-0.501344	6.97448	18.4057	1.78526e-05	0.000279729
ENSG00000080709	KCNN2	protein_coding	-0.625175	4.87126	18.3891	1.80086e-05	0.000281802
ENSG00000100055	CYTH4	protein_coding	0.482639	7.93208	18.3577	1.83078e-05	0.000286105
ENSG00000086300	SNX10	protein_coding	-0.568408	5.50085	18.3483	1.83979e-05	0.000287133
ENSG00000010610	CD4	protein_coding	0.477195	8.3225	18.3454	1.84263e-05	0.000287198
ENSG00000196743	GM2A	protein_coding	-0.48802	7.52406	18.3286	1.859e-05	0.000289158
ENSG00000161911	TREML1	protein_coding	1.78319	-0.320565	18.3274	1.8601e-05	0.000289158
ENSG00000147036	LANCL3	protein_coding	-1.55739	-0.175759	18.3139	1.87336e-05	0.000290837
ENSG00000164821	DEFA4	protein_coding	-1.67401	-0.38758	18.2907	1.89626e-05	0.000293968
ENSG00000104783	KCNN4	protein_coding	0.489008	7.46991	18.2885	1.89849e-05	0.000293968
ENSG00000076716	GPC4	protein_coding	0.837758	2.96702	18.2836	1.90341e-05	0.000294345
ENSG00000169991	IFFO2	protein_coding	-0.925683	2.31979	18.2762	1.91083e-05	0.000295107
ENSG00000112701	SENP6	protein_coding	0.513847	6.55304	18.2592	1.92792e-05	0.000297358
ENSG00000104231	ZFAND1	protein_coding	-0.559809	5.5849	18.2443	1.94302e-05	0.000299296
ENSG00000135549	PKIB	protein_coding	-0.500751	6.91419	18.2411	1.94636e-05	0.00029942
ENSG00000117643	MAN1C1	protein_coding	-1.0356	1.73436	18.2189	1.9691e-05	0.000302525
ENSG00000124813	RUNX2	protein_coding	0.495078	7.11149	18.2101	1.97822e-05	0.000303533
ENSG00000168297	PXK	protein_coding	-0.482368	7.75884	18.1754	2.0146e-05	0.000308714
ENSG00000090776	EFNB1	protein_coding	0.708023	3.98068	18.1626	2.02821e-05	0.000310397
ENSG00000113296	THBS4	protein_coding	-0.624105	4.85123	18.1567	2.03455e-05	0.000310711
ENSG00000134243	SORT1	protein_coding	-0.550991	5.68737	18.1558	2.03551e-05	0.000310711
ENSG00000159176	CSRP1	protein_coding	0.479365	7.93687	18.1122	2.08266e-05	0.000317103
ENSG00000131069	ACSS2	protein_coding	-0.519646	6.33436	18.1121	2.08275e-05	0.000317103
ENSG00000068885	IFT80	protein_coding	-0.631581	4.73056	18.1092	2.08596e-05	0.000317183
ENSG00000105967	TFEC	protein_coding	-0.576823	5.32797	17.9994	2.2098e-05	0.000335583
ENSG00000163728	TTC14	protein_coding	-0.511721	6.47144	17.9106	2.31533e-05	0.000351158
ENSG00000188994	ZNF292	protein_coding	-0.502856	6.69156	17.8967	2.33224e-05	0.00035327
ENSG00000186517	ARHGAP30	protein_coding	0.461362	9.14965	17.8823	2.35002e-05	0.000355509
ENSG00000170873	MTSS1	protein_coding	-0.965438	2.08092	17.8747	2.35931e-05	0.000356458
ENSG00000147536	GINS4	protein_coding	-0.590263	5.1612	17.8655	2.3708e-05	0.000357737
ENSG00000117155	SSX2IP	protein_coding	-0.608837	4.95243	17.8603	2.37731e-05	0.000357826
ENSG00000188042	ARL4C	protein_coding	0.670391	4.28298	17.8602	2.37744e-05	0.000357826
ENSG00000153071	DAB2	protein_coding	0.598069	5.08978	17.8529	2.3866e-05	0.000358748
ENSG00000184640	SEPTIN9	protein_coding	0.479478	7.66125	17.8144	2.43531e-05	0.000365606
ENSG00000169607	CKAP2L	protein_coding	0.535762	5.86417	17.8034	2.44945e-05	0.000367263
ENSG00000163814	CDCP1	protein_coding	-0.895022	2.48448	17.7487	2.52093e-05	0.000377501
ENSG00000125449	ARMC7	protein_coding	0.677875	4.18403	17.6978	2.58929e-05	0.000387248
ENSG00000109184	DCUN1D4	protein_coding	-0.588123	5.14002	17.6857	2.60581e-05	0.000389226
ENSG00000143036	SLC44A3	protein_coding	2.06241	-0.63027	17.6644	2.63514e-05	0.000392903
ENSG00000156787	TBC1D31	protein_coding	-0.645998	4.46123	17.6607	2.64031e-05	0.000392903
ENSG00000140367	UBE2Q2	protein_coding	-0.533131	5.86032	17.6606	2.64039e-05	0.000392903
ENSG00000002834	LASP1	protein_coding	0.469388	8.22237	17.6544	2.64899e-05	0.000393488
ENSG00000105372	RPS19	protein_coding	0.446704	10.6828	17.653	2.65097e-05	0.000393488
ENSG00000138131	LOXL4	protein_coding	1.6409	-0.100688	17.6328	2.67921e-05	0.000397181
ENSG00000142945	KIF2C	protein_coding	0.499759	6.68905	17.6167	2.70201e-05	0.000400059
ENSG00000169679	BUB1	protein_coding	0.48458	7.21634	17.5831	2.75022e-05	0.000406689
ENSG00000060140	STYK1	protein_coding	1.50572	0.140579	17.539	2.81467e-05	0.0004157
ENSG00000114021	NIT2	protein_coding	-0.506999	6.44244	17.5299	2.82832e-05	0.000417194
ENSG00000088325	TPX2	protein_coding	0.474857	7.68836	17.5266	2.8331e-05	0.00041738
ENSG00000116830	TTF2	protein_coding	0.500589	6.6427	17.5234	2.83795e-05	0.000417574
ENSG00000052802	MSMO1	protein_coding	-0.526322	5.94614	17.4998	2.87335e-05	0.000422257
ENSG00000121152	NCAPH	protein_coding	0.506194	6.49082	17.4933	2.88326e-05	0.000422722
ENSG00000164604	GPR85	protein_coding	-0.878825	2.49433	17.493	2.88365e-05	0.000422722
ENSG00000155975	VPS37A	protein_coding	-0.577116	5.22452	17.4857	2.89477e-05	0.000423825
ENSG00000139679	LPAR6	protein_coding	-0.615822	4.78829	17.4502	2.94934e-05	0.000430933
ENSG00000242550	SERPINB10	protein_coding	-0.695411	3.90405	17.4494	2.9506e-05	0.000430933
ENSG00000142657	PGD	protein_coding	-0.457688	8.92678	17.4209	2.99519e-05	0.000436906
ENSG00000105327	BBC3	protein_coding	0.739007	3.55693	17.3817	3.05762e-05	0.000445464
ENSG00000160791	CCR5	protein_coding	0.603918	4.93279	17.3692	3.07777e-05	0.000447848
ENSG00000177084	POLE	protein_coding	0.474026	7.61269	17.3521	3.10556e-05	0.000451336
ENSG00000116990	MYCL	protein_coding	-0.847589	2.66782	17.3458	3.11579e-05	0.000452252
ENSG00000151150	ANK3	protein_coding	1.25241	0.835637	17.3436	3.11951e-05	0.000452252
ENSG00000176903	PNMA1	protein_coding	-0.573914	5.23661	17.3384	3.12809e-05	0.00045258
ENSG00000151065	DCP1B	protein_coding	0.622459	4.70914	17.3375	3.12942e-05	0.00045258
ENSG00000126860	EVI2A	protein_coding	-0.493611	6.72164	17.3244	3.15115e-05	0.000455165
ENSG00000177465	ACOT4	protein_coding	-1.28448	0.536983	17.2906	3.20776e-05	0.000462778
ENSG00000104442	ARMC1	protein_coding	-0.519629	6.04066	17.2847	3.21773e-05	0.000463651
ENSG00000184014	DENND5A	protein_coding	-0.495772	6.62131	17.2251	3.32014e-05	0.000477826
ENSG00000120913	PDLIM2	protein_coding	0.614719	4.80767	17.2122	3.34278e-05	0.000480499
ENSG00000108175	ZMIZ1	protein_coding	0.468221	7.85286	17.194	3.37496e-05	0.000484535
ENSG00000214212	C19orf38	protein_coding	-0.526102	5.84087	17.1781	3.40333e-05	0.000488016
ENSG00000149926	TLCD3B	protein_coding	-1.44936	-0.0026036	17.1616	3.43315e-05	0.000491306
ENSG00000135476	ESPL1	protein_coding	0.482957	7.04074	17.1608	3.43457e-05	0.000491306
ENSG00000089041	P2RX7	protein_coding	-0.642011	4.38873	17.077	3.58936e-05	0.000512827
ENSG00000180773	SLC36A4	protein_coding	-0.54724	5.50896	17.0612	3.61949e-05	0.000516509
ENSG00000075702	WDR62	protein_coding	0.55709	5.40134	17.0265	3.68608e-05	0.000524792
ENSG00000112561	TFEB	protein_coding	0.620245	4.67158	17.0264	3.68641e-05	0.000524792
ENSG00000150337	FCGR1A	protein_coding	-0.489783	6.70337	17.0207	3.69742e-05	0.000525727
ENSG00000163449	TMEM169	protein_coding	-0.878389	2.40772	16.9875	3.76276e-05	0.000534375
ENSG00000126787	DLGAP5	protein_coding	0.498935	6.45625	16.976	3.78563e-05	0.000536978
ENSG00000265972	TXNIP	protein_coding	-0.454894	8.63201	16.9655	3.80655e-05	0.000539299
ENSG00000116761	CTH	protein_coding	-0.981097	1.75987	16.9515	3.83478e-05	0.000542052
ENSG00000125740	FOSB	protein_coding	0.973098	1.9351	16.95	3.83778e-05	0.000542052
ENSG00000152760	TCTEX1D1	protein_coding	-0.973857	1.83872	16.949	3.83973e-05	0.000542052
ENSG00000149635	OCSTAMP	protein_coding	-1.30462	0.403171	16.9453	3.84733e-05	0.000542478
ENSG00000135114	OASL	protein_coding	-0.894843	2.28603	16.9116	3.91617e-05	0.000551527
ENSG00000079215	SLC1A3	protein_coding	-0.823633	2.75948	16.8972	3.94603e-05	0.000555072
ENSG00000188906	LRRK2	protein_coding	-0.558827	5.32629	16.8894	3.96231e-05	0.000556699
ENSG00000100079	LGALS2	protein_coding	-0.887344	2.31796	16.8841	3.97327e-05	0.000557578
ENSG00000136824	SMC2	protein_coding	0.477343	7.09056	16.8432	4.05995e-05	0.000569066
ENSG00000166436	TRIM66	protein_coding	-0.63478	4.41822	16.8229	4.10361e-05	0.000574506
ENSG00000160949	TONSL	protein_coding	0.521023	5.92175	16.8108	4.12975e-05	0.000577482
ENSG00000120833	SOCS2	protein_coding	0.485481	6.76615	16.8022	4.14853e-05	0.000579422
ENSG00000091651	ORC6	protein_coding	0.522819	5.80905	16.7931	4.16852e-05	0.000581528
ENSG00000103522	IL21R	protein_coding	0.847388	2.71076	16.779	4.19965e-05	0.000585181
ENSG00000101986	ABCD1	protein_coding	-0.552295	5.38955	16.7612	4.23918e-05	0.000589994
ENSG00000196247	ZNF107	protein_coding	-0.535256	5.60337	16.7554	4.25201e-05	0.000591084
ENSG00000185633	NDUFA4L2	protein_coding	-1.43248	0.113078	16.7299	4.30966e-05	0.000598395
ENSG00000008277	ADAM22	protein_coding	0.626151	4.54777	16.7036	4.36975e-05	0.000606027
ENSG00000160211	G6PD	protein_coding	0.483998	6.8017	16.6986	4.38127e-05	0.000606914
ENSG00000106948	AKNA	protein_coding	0.463158	7.72164	16.6931	4.3941e-05	0.000607979
ENSG00000089335	ZNF302	protein_coding	-0.778032	3.07969	16.6885	4.40478e-05	0.000608745
ENSG00000164713	BRI3	protein_coding	-0.519044	5.80673	16.6332	4.53506e-05	0.000626018
ENSG00000166750	SLFN5	protein_coding	-0.738887	3.38393	16.6267	4.55056e-05	0.000627426
ENSG00000122483	CCDC18	protein_coding	-0.558699	5.27571	16.6203	4.56599e-05	0.000628821
ENSG00000175040	CHST2	protein_coding	-0.63747	4.34977	16.6136	4.5821e-05	0.000630305
ENSG00000152315	KCNK13	protein_coding	-0.966505	1.83766	16.5632	4.70563e-05	0.000646546
ENSG00000186185	KIF18B	protein_coding	0.502186	6.25676	16.5609	4.71136e-05	0.000646582
ENSG00000180447	GAS1	protein_coding	-1.82016	-0.876242	16.5584	4.7175e-05	0.000646675
ENSG00000168016	TRANK1	protein_coding	0.627857	4.47743	16.5558	4.72388e-05	0.0006468
ENSG00000172159	FRMD3	protein_coding	-0.684691	3.83664	16.542	4.75837e-05	0.000650382
ENSG00000164512	ANKRD55	protein_coding	-1.28544	0.395014	16.541	4.76104e-05	0.000650382
ENSG00000172350	ABCG4	protein_coding	-1.72902	-0.725635	16.5276	4.79469e-05	0.000654224
ENSG00000205269	TMEM170B	protein_coding	-0.480111	6.79234	16.4986	4.86871e-05	0.000663559
ENSG00000183742	MACC1	protein_coding	2.04423	-0.261642	16.4838	4.90678e-05	0.000667977
ENSG00000026297	RNASET2	protein_coding	-0.507441	6.01769	16.4557	4.98002e-05	0.000677168
ENSG00000196781	TLE1	protein_coding	-0.75561	3.20554	16.453	4.98705e-05	0.000677346
ENSG00000188039	NWD1	protein_coding	-0.906964	2.15224	16.4077	5.10777e-05	0.000692947
ENSG00000163739	CXCL1	protein_coding	-1.16762	0.853402	16.376	5.19393e-05	0.000703829
ENSG00000114812	VIPR1	protein_coding	1.31907	0.589566	16.3677	5.21672e-05	0.000706107
ENSG00000085840	ORC1	protein_coding	0.507737	6.00653	16.3514	5.26175e-05	0.000710684
ENSG00000119950	MXI1	protein_coding	-0.507781	5.96941	16.3511	5.26254e-05	0.000710684
ENSG00000087086	FTL	protein_coding	0.423257	11.9178	16.3349	5.30767e-05	0.000715761
ENSG00000172830	SSH3	protein_coding	0.548097	5.37465	16.332	5.31575e-05	0.000715761
ENSG00000008517	IL32	protein_coding	1.01389	1.6163	16.3311	5.31829e-05	0.000715761
ENSG00000147854	UHRF2	protein_coding	0.461884	7.48516	16.3053	5.39138e-05	0.000724773
ENSG00000038945	MSR1	protein_coding	-0.932221	2.00796	16.2815	5.45938e-05	0.000733082
ENSG00000167083	GNGT2	protein_coding	0.764842	3.18991	16.2658	5.50472e-05	0.000738331
ENSG00000196576	PLXNB2	protein_coding	0.447152	8.49241	16.2568	5.5312e-05	0.000741044
ENSG00000116771	AGMAT	protein_coding	1.019	1.57499	16.2464	5.56157e-05	0.000744268
ENSG00000184557	SOCS3	protein_coding	1.47766	0.0122395	16.2343	5.59716e-05	0.000748185
ENSG00000124507	PACSIN1	protein_coding	1.95795	-0.324431	16.204	5.68749e-05	0.000758547
ENSG00000119943	PYROXD2	protein_coding	0.720496	3.5155	16.2037	5.68818e-05	0.000758547
ENSG00000186918	ZNF395	protein_coding	-0.520795	5.67681	16.2018	5.69391e-05	0.000758547
ENSG00000137101	CD72	protein_coding	0.716947	3.50719	16.1829	5.75112e-05	0.000765307
ENSG00000119333	WDR34	protein_coding	0.511822	5.83042	16.1511	5.84859e-05	0.000777402
ENSG00000163513	TGFBR2	protein_coding	-0.511024	5.80304	16.1036	5.99688e-05	0.000796219
ENSG00000139644	TMBIM6	protein_coding	0.428202	10.407	16.0899	6.0405e-05	0.000801111
ENSG00000125772	GPCPD1	protein_coding	-0.47223	6.84029	16.0842	6.05862e-05	0.000802615
ENSG00000185477	GPRIN3	protein_coding	-0.870597	2.37409	16.0816	6.06711e-05	0.00080284
ENSG00000151967	SCHIP1	protein_coding	1.06516	1.3665	16.0777	6.07952e-05	0.000803583
ENSG00000084676	NCOA1	protein_coding	0.603784	4.65379	16.0584	6.14201e-05	0.000810937
ENSG00000100505	TRIM9	protein_coding	-0.690751	3.67202	16.0456	6.18343e-05	0.000815495
ENSG00000203747	FCGR3A	protein_coding	-1.00922	1.53422	16.0194	6.2698e-05	0.000825966
ENSG00000151012	SLC7A11	protein_coding	-0.507831	5.85487	16.0151	6.28393e-05	0.000826907
ENSG00000181523	SGSH	protein_coding	-1.39324	0.289704	15.9972	6.34377e-05	0.000833853
ENSG00000221923	ZNF880	protein_coding	-1.63871	-0.491367	15.9862	6.38073e-05	0.000837781
ENSG00000146232	NFKBIE	protein_coding	0.508831	5.83185	15.9792	6.40423e-05	0.000839934
ENSG00000103811	CTSH	protein_coding	-0.469712	6.8552	15.9484	6.50919e-05	0.000852754
ENSG00000139793	MBNL2	protein_coding	1.66779	-0.454254	15.9314	6.56787e-05	0.000858639
ENSG00000133805	AMPD3	protein_coding	0.508085	5.82829	15.9312	6.56862e-05	0.000858639
ENSG00000196155	PLEKHG4	protein_coding	-0.898335	2.16372	15.9276	6.58123e-05	0.000859337
ENSG00000153721	CNKSR3	protein_coding	-0.975727	1.63359	15.9012	6.6737e-05	0.00087045
ENSG00000120280	CXorf21	protein_coding	-0.447275	8.03396	15.8878	6.72118e-05	0.000875678
ENSG00000161681	SHANK1	protein_coding	0.573134	5.03113	15.8745	6.76863e-05	0.00088089
ENSG00000166801	FAM111A	protein_coding	0.455461	7.46381	15.8685	6.79011e-05	0.000882714
ENSG00000075651	PLD1	protein_coding	-0.529185	5.48067	15.8427	6.88328e-05	0.000893844
ENSG00000198885	ITPRIPL1	protein_coding	0.738489	3.42345	15.8176	6.97524e-05	0.000904792
ENSG00000152104	PTPN14	protein_coding	0.848493	2.44483	15.7488	7.23344e-05	0.000937257
ENSG00000137831	UACA	protein_coding	0.50563	5.80702	15.7361	7.28203e-05	0.00094252
ENSG00000085265	FCN1	protein_coding	-1.45079	-0.174699	15.6693	7.54399e-05	0.000974579
ENSG00000153989	NUS1	protein_coding	-0.482711	6.34926	15.6687	7.54619e-05	0.000974579
ENSG00000130766	SESN2	protein_coding	-0.586598	4.75739	15.6606	7.57866e-05	0.000977705
ENSG00000092853	CLSPN	protein_coding	0.492508	6.10906	15.6535	7.60724e-05	0.000980323
ENSG00000138172	CALHM2	protein_coding	0.58524	4.82388	15.635	7.68209e-05	0.000988891
ENSG00000187554	TLR5	protein_coding	-1.13512	0.903163	15.627	7.71432e-05	0.000991961
ENSG00000107719	PALD1	protein_coding	0.612173	4.46297	15.6242	7.72584e-05	0.000992364
ENSG00000168386	FILIP1L	protein_coding	-0.837272	2.41703	15.6192	7.74641e-05	0.000993591
ENSG00000174749	FAM241A	protein_coding	-0.718665	3.3628	15.6178	7.75219e-05	0.000993591
ENSG00000133740	E2F5	protein_coding	-0.736868	3.21158	15.603	7.81286e-05	0.00100028
ENSG00000196139	AKR1C3	protein_coding	-0.755354	3.07367	15.5983	7.83246e-05	0.00100171
ENSG00000160213	CSTB	protein_coding	-0.447736	7.6668	15.5901	7.86634e-05	0.00100495
ENSG00000006638	TBXA2R	protein_coding	-0.997504	1.48808	15.5753	7.92824e-05	0.00101147
ENSG00000184005	ST6GALNAC3	protein_coding	-1.30277	0.315521	15.5738	7.93445e-05	0.00101147
ENSG00000004455	AK2	protein_coding	-0.426255	9.59266	15.5619	7.9847e-05	0.00101678
ENSG00000205336	ADGRG1	protein_coding	1.69706	-0.0530609	15.5442	8.05966e-05	0.00102522
ENSG00000145949	MYLK4	protein_coding	0.628291	4.23534	15.5392	8.08103e-05	0.0010255
ENSG00000158825	CDA	protein_coding	-0.539857	5.27882	15.5373	8.08945e-05	0.0010255
ENSG00000196550	FAM72A	protein_coding	-0.557881	5.05955	15.5365	8.09268e-05	0.0010255
ENSG00000180998	GPR137C	protein_coding	-1.65999	-0.707415	15.5337	8.10465e-05	0.0010255
ENSG00000106853	PTGR1	protein_coding	-0.849872	2.3391	15.5336	8.10519e-05	0.0010255
ENSG00000188610	FAM72B	protein_coding	-0.572561	4.894	15.5003	8.24912e-05	0.0010426
ENSG00000198093	ZNF649	protein_coding	-0.985431	1.58605	15.4609	8.42312e-05	0.00106345
ENSG00000168300	PCMTD1	protein_coding	-0.50886	5.66892	15.4333	8.54697e-05	0.00107794
ENSG00000073417	PDE8A	protein_coding	-0.704836	3.43006	15.4187	8.61311e-05	0.00108463
ENSG00000169715	MT1E	protein_coding	-0.813865	2.56782	15.4176	8.61838e-05	0.00108463
ENSG00000110880	CORO1C	protein_coding	0.456778	7.05723	15.3989	8.70369e-05	0.00109395
ENSG00000198420	TCAF1	protein_coding	-0.835033	2.40295	15.3974	8.7109e-05	0.00109395
ENSG00000104738	MCM4	protein_coding	0.433266	8.68271	15.3949	8.72257e-05	0.00109425
ENSG00000176842	IRX5	protein_coding	-1.10308	0.944105	15.3751	8.81407e-05	0.00110456
ENSG00000079337	RAPGEF3	protein_coding	-0.785175	2.74998	15.3702	8.8372e-05	0.00110629
ENSG00000084110	HAL	protein_coding	-0.483714	6.18275	15.3493	8.93544e-05	0.0011174
ENSG00000198019	FCGR1B	protein_coding	-0.619697	4.2456	15.3219	9.06582e-05	0.00113251
ENSG00000018625	ATP1A2	protein_coding	0.791906	2.78174	15.2916	9.21251e-05	0.00114962
ENSG00000072195	SPEG	protein_coding	1.39175	0.156299	15.2813	9.26271e-05	0.00115467
ENSG00000144445	KANSL1L	protein_coding	-0.588515	4.62307	15.2695	9.32097e-05	0.00116071
ENSG00000105492	SIGLEC6	protein_coding	0.698249	3.491	15.2571	9.38218e-05	0.0011671
ENSG00000035499	DEPDC1B	protein_coding	0.503201	5.72489	15.2484	9.42566e-05	0.00117128
ENSG00000198795	ZNF521	protein_coding	0.468023	6.58439	15.2148	9.59491e-05	0.00119106
ENSG00000144218	AFF3	protein_coding	0.452524	7.09596	15.1931	9.70552e-05	0.00120353
ENSG00000163322	ABRAXAS1	protein_coding	-0.593632	4.52086	15.1829	9.75827e-05	0.0012088
ENSG00000117479	SLC19A2	protein_coding	-0.66956	3.69373	15.178	9.7837e-05	0.00121068
ENSG00000147145	LPAR4	protein_coding	-1.05393	1.12241	15.1651	9.85077e-05	0.00121771
ENSG00000068137	PLEKHH3	protein_coding	-1.3325	0.0442061	15.1565	9.89581e-05	0.001222
ENSG00000100219	XBP1	protein_coding	-0.439818	7.78348	15.1475	9.94278e-05	0.00122652
ENSG00000130066	SAT1	protein_coding	-0.448344	7.2003	15.1057	0.000101658	0.00125272
ENSG00000176623	RMDN1	protein_coding	-0.493901	5.80739	15.078	0.000103157	0.00126988
ENSG00000104343	UBE2W	protein_coding	-0.48895	5.93335	15.0594	0.000104181	0.00128115
ENSG00000109084	TMEM97	protein_coding	-0.480573	6.13752	15.0446	0.000104999	0.00128986
ENSG00000198417	MT1F	protein_coding	-0.867919	2.11899	15.02	0.000106378	0.00130545
ENSG00000196372	ASB13	protein_coding	-0.622727	4.14339	14.9977	0.00010764	0.00131881
ENSG00000197013	ZNF429	protein_coding	-0.712414	3.27427	14.9969	0.00010769	0.00131881
ENSG00000149809	TM7SF2	protein_coding	-0.738123	3.06889	14.9616	0.00010972	0.00134228
ENSG00000265190	ANXA8	protein_coding	-1.27799	0.180171	14.9489	0.00011046	0.00134995
ENSG00000104290	FZD3	protein_coding	-0.546575	5.07707	14.9261	0.000111808	0.00136501
ENSG00000054793	ATP9A	protein_coding	1.12125	1.03205	14.9234	0.000111963	0.00136549
ENSG00000276644	DACH1	protein_coding	0.460852	6.66929	14.9116	0.000112668	0.00137267
ENSG00000186352	ANKRD37	protein_coding	-1.42213	-0.256008	14.8991	0.000113416	0.00138036
ENSG00000111181	SLC6A12	protein_coding	-0.692486	3.63944	14.8942	0.000113709	0.00138251
ENSG00000176225	RTTN	protein_coding	0.595489	4.47351	14.887	0.000114146	0.00138597
ENSG00000143816	WNT9A	protein_coding	1.09806	1.02451	14.8857	0.000114228	0.00138597
ENSG00000166793	YPEL4	protein_coding	-1.18795	0.545031	14.8823	0.000114432	0.00138602
ENSG00000180573	HIST1H2AC	protein_coding	-0.695721	3.38874	14.8817	0.000114466	0.00138602
ENSG00000074935	TUBE1	protein_coding	-0.557997	4.9168	14.8392	0.000117075	0.00141615
ENSG00000205726	ITSN1	protein_coding	-0.788326	2.62101	14.8361	0.000117268	0.00141704
ENSG00000185813	PCYT2	protein_coding	-0.589697	4.49597	14.8196	0.0001183	0.00142806
ENSG00000140876	NUDT7	protein_coding	-0.645293	3.87794	14.8089	0.00011897	0.00143467
ENSG00000102962	CCL22	protein_coding	-0.858462	2.20398	14.7989	0.000119607	0.00144089
ENSG00000105520	PLPPR2	protein_coding	-0.51575	5.41681	14.7778	0.000120953	0.00145562
ENSG00000144655	CSRNP1	protein_coding	-0.566111	4.79651	14.774	0.000121197	0.00145621
ENSG00000122642	FKBP9	protein_coding	-0.630544	3.99616	14.7732	0.000121248	0.00145621
ENSG00000134107	BHLHE40	protein_coding	-0.530205	5.22508	14.7677	0.000121599	0.00145894
ENSG00000172465	TCEAL1	protein_coding	1.03705	1.37183	14.7604	0.000122074	0.00146316
ENSG00000164088	PPM1M	protein_coding	-0.545432	5.03874	14.7405	0.000123365	0.00147669
ENSG00000125841	NRSN2	protein_coding	-0.781056	2.7095	14.7392	0.000123453	0.00147669
ENSG00000141505	ASGR1	protein_coding	0.914296	1.88736	14.7345	0.000123762	0.0014789
ENSG00000101938	CHRDL1	protein_coding	1.4082	0.0189117	14.6965	0.000126279	0.00150745
ENSG00000074964	ARHGEF10L	protein_coding	-0.592348	4.42483	14.6607	0.000128703	0.00153484
ENSG00000101955	SRPX	protein_coding	2.61569	-0.714454	14.6568	0.000128971	0.00153648
ENSG00000142303	ADAMTS10	protein_coding	0.785541	2.71588	14.6484	0.000129546	0.00154167
ENSG00000112773	TENT5A	protein_coding	-0.435457	7.56424	14.6454	0.00012975	0.00154167
ENSG00000187608	ISG15	protein_coding	-0.800603	2.52232	14.6447	0.000129797	0.00154167
ENSG00000107731	UNC5B	protein_coding	0.86691	2.1623	14.6314	0.000130716	0.00155103
ENSG00000136048	DRAM1	protein_coding	-0.515485	5.38158	14.6259	0.000131103	0.00155405
ENSG00000109929	SC5D	protein_coding	-0.520939	5.30257	14.6132	0.000131986	0.00156296
ENSG00000042980	ADAM28	protein_coding	0.596236	4.39159	14.6044	0.000132604	0.00156871
ENSG00000255302	EID1	protein_coding	-0.444902	7.03857	14.5988	0.000133	0.00157182
ENSG00000177706	FAM20C	protein_coding	-0.614303	4.14022	14.5884	0.000133733	0.0015789
ENSG00000180644	PRF1	protein_coding	1.25653	0.484151	14.5703	0.000135028	0.0015926
ENSG00000183779	ZNF703	protein_coding	-0.921386	1.725	14.5678	0.000135205	0.00159311
ENSG00000163393	SLC22A15	protein_coding	-0.449741	6.82557	14.5611	0.000135687	0.00159643
ENSG00000065328	MCM10	protein_coding	0.480046	5.9985	14.5601	0.000135757	0.00159643
ENSG00000126247	CAPNS1	protein_coding	0.421313	8.62811	14.547	0.000136707	0.00160493
ENSG00000119900	OGFRL1	protein_coding	-0.430265	7.89223	14.5464	0.000136751	0.00160493
ENSG00000134352	IL6ST	protein_coding	-0.79885	2.52494	14.535	0.000137582	0.00161308
ENSG00000143110	C1orf162	protein_coding	-0.448711	6.83708	14.5275	0.000138131	0.00161792
ENSG00000183605	SFXN4	protein_coding	-0.492403	5.68088	14.4989	0.000140243	0.00164102
ENSG00000102471	NDFIP2	protein_coding	0.517382	5.33956	14.4925	0.000140721	0.00164499
ENSG00000128683	GAD1	protein_coding	0.87042	2.08669	14.4721	0.000142254	0.00166127
ENSG00000050730	TNIP3	protein_coding	1.85504	-0.322726	14.4607	0.000143118	0.0016697
ENSG00000188785	ZNF548	protein_coding	-0.523936	5.23156	14.458	0.000143321	0.00167043
ENSG00000117650	NEK2	protein_coding	0.481826	5.87709	14.4527	0.000143726	0.00167351
ENSG00000164983	TMEM65	protein_coding	0.498861	5.59634	14.4295	0.000145501	0.00169251
ENSG00000107957	SH3PXD2A	protein_coding	0.510044	5.42837	14.4274	0.000145671	0.00169282
ENSG00000141665	FBXO15	protein_coding	-0.817862	2.32561	14.424	0.000145933	0.0016942
ENSG00000116133	DHCR24	protein_coding	-0.425695	8.06442	14.4207	0.000146185	0.00169546
ENSG00000174371	EXO1	protein_coding	0.460904	6.41767	14.413	0.000146784	0.00170074
ENSG00000242498	ARPIN	protein_coding	-1.71961	-0.939624	14.4028	0.000147584	0.00170834
ENSG00000158481	CD1C	protein_coding	1.49697	-0.172425	14.3935	0.000148316	0.00171513
ENSG00000187720	THSD4	protein_coding	0.711007	3.22863	14.3669	0.000150421	0.00173778
ENSG00000111110	PPM1H	protein_coding	0.679117	3.46349	14.364	0.000150655	0.00173878
ENSG00000169413	RNASE6	protein_coding	0.53413	5.09667	14.3471	0.000152016	0.00175278
ENSG00000163590	PPM1L	protein_coding	-0.493141	5.63079	14.3287	0.000153503	0.0017682
ENSG00000158106	RHPN1	protein_coding	0.637979	3.93173	14.3249	0.000153816	0.00176847
ENSG00000267534	S1PR2	protein_coding	1.05156	1.1335	14.3248	0.000153825	0.00176847
ENSG00000164935	DCSTAMP	protein_coding	-1.23599	0.301581	14.3098	0.000155054	0.00178087
ENSG00000130270	ATP8B3	protein_coding	-0.523287	5.20719	14.3043	0.00015551	0.00178436
ENSG00000178338	ZNF354B	protein_coding	0.647396	3.75997	14.2926	0.000156478	0.00179374
ENSG00000104899	AMH	protein_coding	0.778774	2.71683	14.2805	0.000157491	0.0018036
ENSG00000090382	LYZ	protein_coding	-0.396414	11.6668	14.2624	0.000159007	0.0018192
ENSG00000175643	RMI2	protein_coding	-0.520956	5.22305	14.2591	0.000159287	0.00182064
ENSG00000119547	ONECUT2	protein_coding	0.641429	3.82436	14.2368	0.000161184	0.00184055
ENSG00000132932	ATP8A2	protein_coding	1.21395	0.463389	14.2198	0.000162649	0.00185549
ENSG00000163964	PIGX	protein_coding	-0.47871	5.82907	14.2146	0.000163099	0.00185883
ENSG00000122884	P4HA1	protein_coding	-0.440884	6.9427	14.1981	0.000164538	0.00187181
ENSG00000173376	NDNF	protein_coding	-0.739624	2.88307	14.1979	0.000164555	0.00187181
ENSG00000134198	TSPAN2	protein_coding	-0.881448	1.84762	14.1959	0.000164733	0.00187204
ENSG00000111676	ATN1	protein_coding	0.464742	6.22926	14.1914	0.00016512	0.00187464
ENSG00000080503	SMARCA2	protein_coding	-0.429116	7.529	14.1704	0.000166973	0.00189386
ENSG00000128965	CHAC1	protein_coding	-1.00587	1.33051	14.1659	0.000167376	0.0018966
ENSG00000110400	NECTIN1	protein_coding	0.559338	4.75696	14.1607	0.000167841	0.00189747
ENSG00000090020	SLC9A1	protein_coding	0.476126	5.96381	14.1598	0.000167923	0.00189747
ENSG00000092529	CAPN3	protein_coding	-0.777861	2.57129	14.1597	0.000167933	0.00189747
ENSG00000141506	PIK3R5	protein_coding	0.436657	7.09831	14.1517	0.00016864	0.00190364
ENSG00000173320	STOX2	protein_coding	-0.665424	3.50417	14.1489	0.000168898	0.00190473
ENSG00000135047	CTSL	protein_coding	-0.528791	5.10328	14.1312	0.000170492	0.00192088
ENSG00000047410	TPR	protein_coding	0.413351	8.80284	14.1187	0.000171633	0.00193189
ENSG00000137193	PIM1	protein_coding	0.593901	4.28919	14.1048	0.000172901	0.00194431
ENSG00000167470	MIDN	protein_coding	0.494393	5.56823	14.0883	0.00017443	0.00195965
ENSG00000167851	CD300A	protein_coding	-0.469965	6.00134	14.0821	0.000174998	0.00196291
ENSG00000152582	SPEF2	protein_coding	-0.693371	3.24443	14.0816	0.000175052	0.00196291
ENSG00000171596	NMUR1	protein_coding	-0.92765	1.61173	14.0748	0.000175686	0.00196678
ENSG00000172349	IL16	protein_coding	0.470196	6.0273	14.0743	0.00017573	0.00196678
ENSG00000254827	SLC22A18AS	protein_coding	-1.57509	-0.58216	14.0684	0.000176283	0.0019711
ENSG00000174669	SLC29A2	protein_coding	-0.555641	4.76712	14.0617	0.000176911	0.00197626
ENSG00000068489	PRR11	protein_coding	0.472912	5.93596	14.0462	0.000178373	0.00199071
ENSG00000111371	SLC38A1	protein_coding	0.422084	7.92254	14.0406	0.000178907	0.00199403
ENSG00000185010	F8	protein_coding	-0.594529	4.22987	14.0395	0.000179008	0.00199403
ENSG00000187800	PEAR1	protein_coding	-0.915925	1.6535	14.0272	0.000180184	0.00200524
ENSG00000148180	GSN	protein_coding	-0.432582	7.16648	14.0116	0.000181685	0.00202005
ENSG00000155265	GOLGA7B	protein_coding	0.735812	2.95252	13.9941	0.000183383	0.00203641
ENSG00000138336	TET1	protein_coding	-0.771019	2.56994	13.9929	0.000183501	0.00203641
ENSG00000005379	TSPOAP1	protein_coding	0.479328	5.77164	13.9841	0.000184364	0.00204407
ENSG00000170113	NIPA1	protein_coding	-0.459915	6.23457	13.9803	0.000184739	0.00204631
ENSG00000135744	AGT	protein_coding	0.430456	7.28263	13.9749	0.000185272	0.0020503
ENSG00000196182	STK40	protein_coding	0.465902	6.11353	13.9688	0.000185873	0.00205502
ENSG00000111602	TIMELESS	protein_coding	0.42554	7.56409	13.9657	0.000186178	0.00205648
ENSG00000146918	NCAPG2	protein_coding	0.435644	7.01401	13.9553	0.000187208	0.00206592
ENSG00000137135	ARHGEF39	protein_coding	0.48332	5.69933	13.9325	0.00018949	0.00208664
ENSG00000176049	JAKMIP2	protein_coding	-1.66755	-0.897957	13.9317	0.000189572	0.00208664
ENSG00000140564	FURIN	protein_coding	-0.560395	4.65102	13.9304	0.000189702	0.00208664
ENSG00000114013	CD86	protein_coding	-0.49407	5.51786	13.9296	0.000189791	0.00208664
ENSG00000214029	ZNF891	protein_coding	-0.781025	2.56333	13.9273	0.000190023	0.00208726
ENSG00000102032	RENBP	protein_coding	-0.641268	3.74566	13.9234	0.000190413	0.0020896
ENSG00000259803	SLC22A31	protein_coding	-1.7046	-0.657442	13.8991	0.000192891	0.00211483
ENSG00000247596	TWF2	protein_coding	-0.485936	5.62816	13.8908	0.000193744	0.00212221
ENSG00000133030	MPRIP	protein_coding	0.429979	7.21364	13.8735	0.000195539	0.00213989
ENSG00000198133	TMEM229B	protein_coding	0.569859	4.53152	13.8585	0.000197108	0.00215507
ENSG00000135924	DNAJB2	protein_coding	-0.638503	3.69881	13.855	0.00019747	0.00215703
ENSG00000157216	SSBP3	protein_coding	0.485554	5.62414	13.8282	0.000200307	0.00218601
ENSG00000261371	PECAM1	protein_coding	-0.411197	8.56361	13.8254	0.000200607	0.00218726
ENSG00000100580	TMED8	protein_coding	-0.421285	7.68937	13.8121	0.00020203	0.00220028
ENSG00000145439	CBR4	protein_coding	-0.55813	4.63239	13.8094	0.000202319	0.00220028
ENSG00000185669	SNAI3	protein_coding	0.930909	1.59604	13.8091	0.000202359	0.00220028
ENSG00000090889	KIF4A	protein_coding	0.4712	5.86708	13.8062	0.000202666	0.00220159
ENSG00000122644	ARL4A	protein_coding	-0.649542	3.58187	13.8041	0.000202897	0.00220209
ENSG00000189007	ADAT2	protein_coding	-0.504012	5.33625	13.793	0.000204099	0.0022131
ENSG00000137801	THBS1	protein_coding	-0.660065	3.47626	13.7829	0.0002052	0.002223
ENSG00000106415	GLCCI1	protein_coding	-0.637037	3.69274	13.7664	0.000207007	0.00224053
ENSG00000152556	PFKM	protein_coding	0.634143	3.75977	13.7608	0.000207623	0.00224504
ENSG00000198042	MAK16	protein_coding	-0.463391	6.03354	13.7579	0.000207946	0.00224504
ENSG00000076382	SPAG5	protein_coding	0.428543	7.18251	13.7575	0.000207994	0.00224504
ENSG00000249115	HAUS5	protein_coding	0.52552	5.06991	13.7341	0.0002106	0.00226922
ENSG00000001084	GCLC	protein_coding	0.442235	6.64489	13.7339	0.000210617	0.00226922
ENSG00000174938	SEZ6L2	protein_coding	0.607459	4.07201	13.7135	0.000212919	0.00229193
ENSG00000095383	TBC1D2	protein_coding	-0.638079	3.69141	13.7072	0.000213631	0.0022975
ENSG00000221829	FANCG	protein_coding	0.461357	6.09998	13.692	0.00021537	0.00231411
ENSG00000108179	PPIF	protein_coding	0.407947	8.68286	13.6815	0.000216576	0.00232495
ENSG00000137203	TFAP2A	protein_coding	-0.709089	3.06351	13.6376	0.000221702	0.00237782
ENSG00000167173	C15orf39	protein_coding	0.439673	6.69177	13.635	0.000222013	0.002379
ENSG00000135926	TMBIM1	protein_coding	-0.439089	6.67551	13.6293	0.000222687	0.00238406
ENSG00000147654	EBAG9	protein_coding	-0.541565	4.80704	13.6007	0.000226098	0.00241839
ENSG00000136026	CKAP4	protein_coding	0.410879	8.28258	13.5865	0.000227813	0.00243453
ENSG00000178878	APOLD1	protein_coding	-0.740768	2.72322	13.5761	0.000229083	0.0024459
ENSG00000152056	AP1S3	protein_coding	0.49036	5.49104	13.5739	0.000229349	0.00244652
ENSG00000132357	CARD6	protein_coding	0.531643	4.94882	13.5695	0.000229892	0.00245011
ENSG00000163661	PTX3	protein_coding	-0.714349	2.95525	13.5644	0.000230512	0.0024545
ENSG00000179639	FCER1A	protein_coding	0.627732	3.7582	13.5242	0.000235505	0.00250542
ENSG00000163285	GABRG1	protein_coding	-1.12176	0.599689	13.5197	0.000236078	0.00250925
ENSG00000141391	PRELID3A	protein_coding	0.761528	2.62523	13.5072	0.000237655	0.00252375
ENSG00000101412	E2F1	protein_coding	0.482573	5.59189	13.5038	0.000238082	0.00252601
ENSG00000007944	MYLIP	protein_coding	-0.487364	5.48692	13.4887	0.000240002	0.00254411
ENSG00000021355	SERPINB1	protein_coding	-0.414994	7.77573	13.486	0.000240344	0.00254545
ENSG00000106780	MEGF9	protein_coding	-0.44333	6.4629	13.4539	0.000244494	0.00258484
ENSG00000206190	ATP10A	protein_coding	0.488634	5.48156	13.4539	0.0002445	0.00258484
ENSG00000147679	UTP23	protein_coding	-0.492221	5.39942	13.4143	0.00024971	0.00263535
ENSG00000137496	IL18BP	protein_coding	0.514856	5.15537	13.4126	0.000249934	0.00263535
ENSG00000167105	TMEM92	protein_coding	1.04566	0.988264	13.411	0.000250147	0.00263535
ENSG00000163655	GMPS	protein_coding	-0.408835	8.21238	13.4109	0.000250169	0.00263535
ENSG00000143850	PLEKHA6	protein_coding	0.539203	4.82121	13.4051	0.000250939	0.00264111
ENSG00000122547	EEPD1	protein_coding	0.536341	4.86244	13.3984	0.000251837	0.00264793
ENSG00000196517	SLC6A9	protein_coding	-1.29866	0.282905	13.3969	0.000252035	0.00264793
ENSG00000184363	PKP3	protein_coding	-0.950481	1.3304	13.3875	0.000253313	0.00265786
ENSG00000112414	ADGRG6	protein_coding	0.462506	5.92976	13.3866	0.00025343	0.00265786
ENSG00000174007	CEP19	protein_coding	-0.599353	4.00976	13.3829	0.000253926	0.00266071
ENSG00000140332	TLE3	protein_coding	0.450574	6.23967	13.3768	0.000254761	0.00266545
ENSG00000008516	MMP25	protein_coding	-0.491144	5.40208	13.3763	0.000254829	0.00266545
ENSG00000126759	CFP	protein_coding	0.826882	2.14632	13.3472	0.000258812	0.00270472
ENSG00000159228	CBR1	protein_coding	-0.485504	5.48123	13.3418	0.00025955	0.00271004
ENSG00000162496	DHRS3	protein_coding	1.02206	1.09859	13.3211	0.000262435	0.00273741
ENSG00000122861	PLAU	protein_coding	-0.465232	5.78608	13.3197	0.000262634	0.00273741
ENSG00000170312	CDK1	protein_coding	0.424368	7.04483	13.2961	0.000265959	0.00276775
ENSG00000151914	DST	protein_coding	0.473657	5.66367	13.2957	0.000266012	0.00276775
ENSG00000198363	ASPH	protein_coding	-0.471124	5.68695	13.29	0.000266823	0.00277374
ENSG00000168350	DEGS2	protein_coding	1.02477	1.18189	13.2641	0.000270531	0.00280982
ENSG00000162772	ATF3	protein_coding	-0.632034	3.63025	13.2562	0.000271676	0.00281923
ENSG00000170379	TCAF2	protein_coding	-1.6849	-0.859356	13.2535	0.000272068	0.00282082
ENSG00000173890	GPR160	protein_coding	-0.438827	6.50031	13.2455	0.00027323	0.00283039
ENSG00000185187	SIGIRR	protein_coding	-0.606799	3.89496	13.2437	0.000273502	0.00283074
ENSG00000147475	ERLIN2	protein_coding	-0.421006	7.13717	13.2388	0.000274217	0.00283522
ENSG00000148690	FRA10AC1	protein_coding	-0.551723	4.55459	13.2367	0.000274519	0.00283522
ENSG00000102287	GABRE	protein_coding	1.27221	0.213483	13.2358	0.000274654	0.00283522
ENSG00000163864	NMNAT3	protein_coding	-0.563504	4.39451	13.2308	0.000275382	0.00284025
ENSG00000187837	HIST1H1C	protein_coding	-0.641847	3.5157	13.2221	0.000276667	0.00285102
ENSG00000164758	MED30	protein_coding	-0.536416	4.76889	13.2163	0.000277518	0.00285572
ENSG00000186665	C17orf58	protein_coding	-0.630918	3.62536	13.2151	0.0002777	0.00285572
ENSG00000101082	SLA2	protein_coding	1.11231	0.665503	13.213	0.000278012	0.00285572
ENSG00000184785	SMIM10	protein_coding	-0.754356	2.53763	13.2125	0.000278089	0.00285572
ENSG00000105486	LIG1	protein_coding	0.431073	6.73371	13.2075	0.000278838	0.00285808
ENSG00000178789	CD300LB	protein_coding	0.654517	3.45165	13.2048	0.000279239	0.00285808
ENSG00000267060	PTGES3L	protein_coding	-0.748125	2.57323	13.2041	0.000279344	0.00285808
ENSG00000186652	PRG2	protein_coding	-1.73264	-0.779905	13.2031	0.00027949	0.00285808
ENSG00000061656	SPAG4	protein_coding	-1.23788	0.0731581	13.2028	0.000279527	0.00285808
ENSG00000123983	ACSL3	protein_coding	-0.42391	6.98123	13.1874	0.00028184	0.00287924
ENSG00000134287	ARF3	protein_coding	0.39481	9.25884	13.1742	0.000283833	0.00289711
ENSG00000112118	MCM3	protein_coding	0.398137	8.90205	13.1722	0.000284126	0.00289759
ENSG00000165802	NSMF	protein_coding	0.431535	6.69346	13.17	0.000284471	0.00289861
ENSG00000136830	NIBAN2	protein_coding	-0.485903	5.4439	13.1641	0.000285369	0.00290526
ENSG00000134109	EDEM1	protein_coding	-0.411588	7.63343	13.1534	0.000287002	0.00291937
ENSG00000182183	SHISAL2A	protein_coding	-0.631962	3.61452	13.1406	0.000288958	0.00293675
ENSG00000177453	NIM1K	protein_coding	-1.17533	0.30356	13.1008	0.000295162	0.00299469
ENSG00000167977	KCTD5	protein_coding	0.485746	5.43626	13.1008	0.000295165	0.00299469
ENSG00000132879	FBXO44	protein_coding	0.55906	4.44479	13.0797	0.000298519	0.00302611
ENSG00000197852	INKA2	protein_coding	0.59261	4.04632	13.0732	0.000299556	0.00303403
ENSG00000205133	TRIQK	protein_coding	-0.52181	4.92994	13.0678	0.00030041	0.00304008
ENSG00000145390	USP53	protein_coding	0.558067	4.44151	13.0333	0.000306	0.003094
ENSG00000134333	LDHA	protein_coding	-0.384664	10.4974	13.0313	0.000306326	0.00309466
ENSG00000013364	MVP	protein_coding	0.449434	6.13525	13.0024	0.000311087	0.00314007
ENSG00000213626	LBH	protein_coding	-1.04285	0.830921	12.9981	0.000311807	0.00314465
ENSG00000132635	PCED1A	protein_coding	-0.536824	4.69444	12.9763	0.000315466	0.0031777
ENSG00000160789	LMNA	protein_coding	0.422177	6.92097	12.9747	0.000315726	0.0031777
ENSG00000019169	MARCO	protein_coding	-0.861763	1.74534	12.9737	0.00031589	0.0031777
ENSG00000166575	TMEM135	protein_coding	-0.532609	4.74371	12.9495	0.00032	0.00321631
ENSG00000146416	AIG1	protein_coding	-0.871061	1.65546	12.9464	0.000320535	0.00321822
ENSG00000115687	PASK	protein_coding	0.465066	5.7151	12.9453	0.000320734	0.00321822
ENSG00000161835	GRASP	protein_coding	1.28419	0.119379	12.9285	0.000323618	0.003244
ENSG00000123146	ADGRE5	protein_coding	-0.456184	5.84119	12.9271	0.000323852	0.003244
ENSG00000162892	IL24	protein_coding	-1.15067	0.315366	12.9069	0.000327365	0.00327642
ENSG00000196126	HLA-DRB1	protein_coding	0.551239	4.50485	12.8969	0.00032913	0.0032913
ENSG00000135537	AFG1L	protein_coding	-0.61932	3.65869	12.8923	0.000329931	0.00329652
ENSG00000113494	PRLR	protein_coding	-1.38157	-0.233552	12.8895	0.000330428	0.00329871
ENSG00000184465	WDR27	protein_coding	-0.495762	5.2336	12.8876	0.000330765	0.00329928
ENSG00000176393	RNPEP	protein_coding	0.398495	8.42462	12.8832	0.000331549	0.00330432
ENSG00000151287	TEX30	protein_coding	0.518574	4.94489	12.8678	0.00033428	0.00332873
ENSG00000221866	PLXNA4	protein_coding	-0.959405	1.23442	12.8554	0.000336503	0.00334724
ENSG00000105613	MAST1	protein_coding	-1.47861	-0.524501	12.8543	0.000336705	0.00334724
ENSG00000114120	SLC25A36	protein_coding	-0.452318	5.91302	12.8428	0.000338782	0.00336506
ENSG00000101868	POLA1	protein_coding	0.442753	6.21024	12.8394	0.000339389	0.00336827
ENSG00000134690	CDCA8	protein_coding	0.427799	6.63097	12.8215	0.000342667	0.00339795
ENSG00000167562	ZNF701	protein_coding	-0.690675	3.00768	12.7838	0.000349626	0.00346253
ENSG00000126267	COX6B1	protein_coding	0.399019	8.23266	12.7827	0.000349848	0.00346253
ENSG00000090861	AARS	protein_coding	-0.403647	7.80883	12.7815	0.000350058	0.00346253
ENSG00000166451	CENPN	protein_coding	0.546142	4.54326	12.7778	0.000350751	0.00346649
ENSG00000071054	MAP4K4	protein_coding	0.399471	8.14122	12.7384	0.000358217	0.00353732
ENSG00000121690	DEPDC7	protein_coding	-0.702027	2.87181	12.7178	0.000362193	0.00357293
ENSG00000198873	GRK5	protein_coding	-0.967113	1.11808	12.7166	0.000362427	0.00357293
ENSG00000155659	VSIG4	protein_coding	-0.836348	1.90595	12.6941	0.000366813	0.00361316
ENSG00000142235	LMTK3	protein_coding	-1.39406	-0.416084	12.6828	0.000369033	0.003632
ENSG00000185909	KLHDC8B	protein_coding	-0.878286	1.56949	12.6808	0.000369427	0.00363285
ENSG00000160255	ITGB2	protein_coding	-0.383266	9.81182	12.6718	0.000371206	0.00364523
ENSG00000100749	VRK1	protein_coding	-0.431778	6.40949	12.6713	0.000371302	0.00364523
ENSG00000101003	GINS1	protein_coding	0.474156	5.49451	12.6545	0.000374657	0.00367512
ENSG00000107954	NEURL1	protein_coding	1.05138	0.910874	12.6525	0.000375057	0.003676
ENSG00000035115	SH3YL1	protein_coding	-0.540544	4.53643	12.6415	0.000377272	0.00369465
ENSG00000171729	TMEM51	protein_coding	-0.791888	2.13914	12.6293	0.000379751	0.00371477
ENSG00000177675	CD163L1	protein_coding	0.80148	2.25111	12.6283	0.000379955	0.00371477
ENSG00000162433	AK4	protein_coding	-0.498547	5.1045	12.5945	0.000386892	0.00377947
ENSG00000169981	ZNF35	protein_coding	0.662313	3.22404	12.5662	0.000392793	0.00383394
ENSG00000070718	AP3M2	protein_coding	-0.509667	4.95792	12.5645	0.000393149	0.00383426
ENSG00000167748	KLK1	protein_coding	-0.683606	2.99422	12.5597	0.000394164	0.00384099
ENSG00000143507	DUSP10	protein_coding	0.48201	5.32215	12.5568	0.000394757	0.0038436
ENSG00000149294	NCAM1	protein_coding	-0.427471	6.48074	12.555	0.000395139	0.00384416
ENSG00000125148	MT2A	protein_coding	-0.796154	2.10078	12.5388	0.000398591	0.00387456
ENSG00000135334	AKIRIN2	protein_coding	-0.420538	6.68506	12.5311	0.000400225	0.00388725
ENSG00000129450	SIGLEC9	protein_coding	-0.706097	2.77148	12.5064	0.00040555	0.00393573
ENSG00000131153	GINS2	protein_coding	0.453689	5.73867	12.4834	0.000410584	0.00398031
ENSG00000146733	PSPH	protein_coding	-0.55988	4.25132	12.4823	0.000410816	0.00398031
ENSG00000134830	C5AR2	protein_coding	-0.872217	1.55263	12.4569	0.000416454	0.00403163
ENSG00000129255	MPDU1	protein_coding	0.440505	6.06181	12.4551	0.000416859	0.00403225
ENSG00000108828	VAT1	protein_coding	-0.397429	7.89107	12.4523	0.000417474	0.0040343
ENSG00000175894	TSPEAR	protein_coding	1.12525	0.513	12.4511	0.000417753	0.0040343
ENSG00000114473	IQCG	protein_coding	-0.582265	3.95058	12.4437	0.000419408	0.00404698
ENSG00000119979	DENND10	protein_coding	-0.579	3.98637	12.4302	0.000422451	0.00407302
ENSG00000171049	FPR2	protein_coding	-0.586243	3.95821	12.423	0.000424085	0.00408545
ENSG00000095066	HOOK2	protein_coding	-0.582535	3.94088	12.4088	0.000427315	0.00411321
ENSG00000143842	SOX13	protein_coding	-1.23577	-0.0835788	12.4003	0.000429258	0.00412855
ENSG00000175073	VCPIP1	protein_coding	-0.445758	5.87117	12.3976	0.000429892	0.0041313
ENSG00000142669	SH3BGRL3	protein_coding	0.38541	8.98594	12.3898	0.000431694	0.00414524
ENSG00000149260	CAPN5	protein_coding	-0.855386	1.71821	12.3803	0.000433895	0.004163
ENSG00000169902	TPST1	protein_coding	0.79402	2.14162	12.3737	0.000435415	0.0041742
ENSG00000147872	PLIN2	protein_coding	-0.432937	6.21561	12.3625	0.000438044	0.004196
ENSG00000163617	CCDC191	protein_coding	-0.885954	1.4582	12.3442	0.000442351	0.00423383
ENSG00000111247	RAD51AP1	protein_coding	0.489802	5.16755	12.3374	0.000443974	0.00424593
ENSG00000187902	SHISA7	protein_coding	-0.947425	1.17239	12.3344	0.000444681	0.00424925
ENSG00000151503	NCAPD3	protein_coding	0.404708	7.25423	12.3246	0.000447024	0.00426648
ENSG00000114735	HEMK1	protein_coding	-0.559872	4.19922	12.3239	0.000447205	0.00426648
ENSG00000186174	BCL9L	protein_coding	0.588752	3.93699	12.3146	0.000449421	0.00428417
ENSG00000185432	METTL7A	protein_coding	0.454342	5.67681	12.3077	0.000451103	0.00429674
ENSG00000166145	SPINT1	protein_coding	-0.471985	5.38676	12.304	0.000451987	0.00430169
ENSG00000168283	BMI1	protein_coding	0.449006	5.79934	12.2845	0.000456738	0.00434342
ENSG00000142798	HSPG2	protein_coding	0.478496	5.32777	12.2816	0.000457452	0.00434671
ENSG00000101546	RBFA	protein_coding	-0.526978	4.63359	12.2781	0.000458295	0.00435123
ENSG00000165983	PTER	protein_coding	-0.509678	4.88662	12.2734	0.000459456	0.00435876
ENSG00000103365	GGA2	protein_coding	-0.393969	7.88511	12.2341	0.000469242	0.00444802
ENSG00000167524	RSKR	protein_coding	0.542644	4.49234	12.2279	0.00047081	0.00445791
ENSG00000104320	NBN	protein_coding	-0.415283	6.69941	12.2264	0.000471176	0.00445791
ENSG00000173334	TRIB1	protein_coding	-0.689533	2.84169	12.2255	0.000471415	0.00445791
ENSG00000175984	DENND2C	protein_coding	-1.16763	0.118075	12.216	0.000473819	0.00447706
ENSG00000156265	MAP3K7CL	protein_coding	-0.977609	0.942274	12.1797	0.000483112	0.00456122
ENSG00000169220	RGS14	protein_coding	0.445304	5.81413	12.1747	0.00048443	0.00457002
ENSG00000163071	SPATA18	protein_coding	0.549855	4.30735	12.1616	0.000487844	0.00459738
ENSG00000119669	IRF2BPL	protein_coding	-0.845441	1.65044	12.1606	0.000488107	0.00459738
ENSG00000163781	TOPBP1	protein_coding	0.39699	7.55572	12.1466	0.000491783	0.00462764
ENSG00000167483	NIBAN3	protein_coding	1.02438	0.844972	12.1454	0.000492103	0.00462764
ENSG00000239887	C1orf226	protein_coding	-0.717877	2.57625	12.1259	0.000497251	0.00467234
ENSG00000067141	NEO1	protein_coding	-0.648625	3.19692	12.1218	0.000498349	0.00467894
ENSG00000115425	PECR	protein_coding	-0.565494	4.0497	12.0746	0.000511145	0.00479527
ENSG00000113161	HMGCR	protein_coding	-0.392279	7.80423	12.0711	0.000512083	0.00480027
ENSG00000100889	PCK2	protein_coding	-0.432289	6.08564	12.059	0.000515443	0.00482794
ENSG00000131398	KCNC3	protein_coding	-0.68407	2.85027	12.0474	0.00051865	0.00485414
ENSG00000101916	TLR8	protein_coding	-0.528768	4.53425	12.0237	0.000525272	0.00491223
ENSG00000163606	CD200R1	protein_coding	0.554791	4.1989	12.0213	0.000525962	0.0049148
ENSG00000104756	KCTD9	protein_coding	-0.458258	5.51636	12.0158	0.000527522	0.00492324
ENSG00000156876	SASS6	protein_coding	0.522952	4.63487	12.0152	0.000527698	0.00492324
ENSG00000168672	LRATD2	protein_coding	0.70208	2.75385	11.9921	0.000534269	0.00498061
ENSG00000161692	DBF4B	protein_coding	0.476024	5.26865	11.9846	0.000536415	0.00499668
ENSG00000173083	HPSE	protein_coding	-0.50518	4.85883	11.9812	0.000537403	0.00500195
ENSG00000148308	GTF3C5	protein_coding	0.388184	8.06247	11.9797	0.000537841	0.00500209
ENSG00000025156	HSF2	protein_coding	-0.457483	5.5158	11.9777	0.000538399	0.00500335
ENSG00000160712	IL6R	protein_coding	0.379808	8.87734	11.972	0.000540069	0.00501493
ENSG00000251322	SHANK3	protein_coding	1.05519	0.662398	11.9512	0.000546131	0.00506443
ENSG00000102524	TNFSF13B	protein_coding	-0.408529	6.76862	11.9503	0.000546389	0.00506443
ENSG00000137103	TMEM8B	protein_coding	0.865054	1.58076	11.9487	0.000546847	0.00506443
ENSG00000079435	LIPE	protein_coding	1.24617	0.0802165	11.9478	0.000547112	0.00506443
ENSG00000084764	MAPRE3	protein_coding	0.616236	3.50913	11.9455	0.000547807	0.00506689
ENSG00000152684	PELO	protein_coding	0.490747	5.06555	11.94	0.000549417	0.00507782
ENSG00000092470	WDR76	protein_coding	0.446852	5.68366	11.9169	0.000556271	0.00513714
ENSG00000011426	ANLN	protein_coding	0.410055	6.7446	11.9149	0.000556873	0.0051387
ENSG00000119772	DNMT3A	protein_coding	-0.51619	4.67242	11.9118	0.000557793	0.00514318
ENSG00000185112	FAM43A	protein_coding	-0.550799	4.2019	11.9067	0.000559316	0.0051532
ENSG00000213889	PPM1N	protein_coding	-0.83921	1.64191	11.9	0.000561327	0.00516448
ENSG00000108474	PIGL	protein_coding	-0.733376	2.38916	11.8998	0.000561413	0.00516448
ENSG00000005436	GCFC2	protein_coding	-0.50973	4.75373	11.8941	0.000563132	0.00517626
ENSG00000156471	PTDSS1	protein_coding	-0.381823	8.50086	11.886	0.000565562	0.00519456
ENSG00000163362	INAVA	protein_coding	0.455467	5.53482	11.8532	0.000575619	0.00528225
ENSG00000106462	EZH2	protein_coding	0.412796	6.57024	11.852	0.000576002	0.00528225
ENSG00000076641	PAG1	protein_coding	-0.401845	6.96467	11.826	0.000584107	0.00535243
ENSG00000053918	KCNQ1	protein_coding	0.687953	2.84293	11.8033	0.000591268	0.00541385
ENSG00000242220	TCP10L	protein_coding	1.06638	0.801663	11.7798	0.000598756	0.00547784
ENSG00000165322	ARHGAP12	protein_coding	-0.579386	3.80242	11.7785	0.000599182	0.00547784
ENSG00000100504	PYGL	protein_coding	-0.370493	9.61462	11.7737	0.000600732	0.00548407
ENSG00000165389	SPTSSA	protein_coding	-0.466179	5.32521	11.7735	0.000600791	0.00548407
ENSG00000140538	NTRK3	protein_coding	1.18258	0.181304	11.7681	0.000602557	0.00549595
ENSG00000125648	SLC25A23	protein_coding	-0.407911	6.67157	11.766	0.000603217	0.00549773
ENSG00000150907	FOXO1	protein_coding	-1.27567	-0.229855	11.7631	0.000604174	0.00550221
ENSG00000137094	DNAJB5	protein_coding	-0.700588	2.6671	11.7383	0.000612253	0.00556929
ENSG00000122862	SRGN	protein_coding	-0.357497	12.2352	11.7377	0.000612481	0.00556929
ENSG00000113356	POLR3G	protein_coding	-0.6163	3.45829	11.7317	0.000614453	0.00558293
ENSG00000167600	CYP2S1	protein_coding	0.429469	6.02881	11.7256	0.000616474	0.00559332
ENSG00000011600	TYROBP	protein_coding	0.38252	8.21778	11.7254	0.000616542	0.00559332
ENSG00000130812	ANGPTL6	protein_coding	-0.653977	3.04656	11.7025	0.000624159	0.00565808
ENSG00000103381	CPPED1	protein_coding	-0.494594	4.91903	11.6993	0.000625222	0.00566338
ENSG00000101417	PXMP4	protein_coding	-0.682706	2.78557	11.695	0.000626676	0.00567221
ENSG00000163686	ABHD6	protein_coding	-0.623334	3.32941	11.6848	0.000630114	0.00569897
ENSG00000166483	WEE1	protein_coding	0.434371	5.84079	11.6766	0.000632912	0.0057199
ENSG00000184730	APOBR	protein_coding	0.387267	7.70398	11.6736	0.000633934	0.00572476
ENSG00000047365	ARAP2	protein_coding	0.591045	3.6984	11.6612	0.000638163	0.00575856
ENSG00000084731	KIF3C	protein_coding	-0.500088	4.82474	11.6569	0.000639648	0.00576756
ENSG00000165304	MELK	protein_coding	0.433724	5.82897	11.6521	0.000641298	0.00577803
ENSG00000187957	DNER	protein_coding	-1.36054	-0.487829	11.647	0.000643062	0.00578952
ENSG00000138160	KIF11	protein_coding	0.392453	7.3524	11.6299	0.000649012	0.00583864
ENSG00000076067	RBMS2	protein_coding	0.587728	3.7041	11.6009	0.000659204	0.00592583
ENSG00000103404	USP31	protein_coding	-0.429712	5.90972	11.5983	0.000660104	0.00592941
ENSG00000111344	RASAL1	protein_coding	0.876565	1.58712	11.5781	0.000667326	0.00598974
ENSG00000102226	USP11	protein_coding	-0.458832	5.3737	11.5762	0.000668011	0.00599134
ENSG00000156639	ZFAND3	protein_coding	0.423691	6.09184	11.5586	0.000674364	0.00604373
ENSG00000047932	GOPC	protein_coding	-0.411079	6.4548	11.5429	0.000680071	0.00608903
ENSG00000175745	NR2F1	protein_coding	0.855995	1.65488	11.5419	0.000680461	0.00608903
ENSG00000165300	SLITRK5	protein_coding	0.535217	4.31303	11.5405	0.000680963	0.00608903
ENSG00000183307	TMEM121B	protein_coding	-0.447924	5.53562	11.5373	0.000682143	0.00609498
ENSG00000130844	ZNF331	protein_coding	0.544161	4.18728	11.5204	0.000688383	0.00614609
ENSG00000125657	TNFSF9	protein_coding	0.504735	4.7235	11.5141	0.000690716	0.00616227
ENSG00000156469	MTERF3	protein_coding	-0.458158	5.35756	11.5048	0.000694165	0.00618837
ENSG00000186812	ZNF397	protein_coding	-0.427756	5.88923	11.4765	0.000704833	0.00627875
ENSG00000135424	ITGA7	protein_coding	0.387585	7.39904	11.4461	0.000716431	0.00637726
ENSG00000135678	CPM	protein_coding	-0.40487	6.57978	11.431	0.00072228	0.00642449
ENSG00000111679	PTPN6	protein_coding	0.368764	9.1265	11.4287	0.000723169	0.00642712
ENSG00000138380	CARF	protein_coding	-0.629349	3.19924	11.4275	0.000723662	0.00642712
ENSG00000173207	CKS1B	protein_coding	-0.460106	5.31335	11.4261	0.000724207	0.00642713
ENSG00000120992	LYPLA1	protein_coding	-0.403924	6.63359	11.4238	0.000725111	0.00643033
ENSG00000132749	TESMIN	protein_coding	-0.448017	5.49535	11.4203	0.000726473	0.00643758
ENSG00000175294	CATSPER1	protein_coding	-0.615853	3.31919	11.4172	0.000727657	0.00644325
ENSG00000100526	CDKN3	protein_coding	0.478934	5.05444	11.4025	0.000733444	0.00648964
ENSG00000176170	SPHK1	protein_coding	0.737292	2.34105	11.3908	0.000738082	0.00652579
ENSG00000132274	TRIM22	protein_coding	0.378206	8.0486	11.3728	0.000745279	0.0065845
ENSG00000197629	MPEG1	protein_coding	-0.381726	7.7074	11.3663	0.0007479	0.00660262
ENSG00000115216	NRBP1	protein_coding	0.392782	7.02706	11.3649	0.000748446	0.00660262
ENSG00000179604	CDC42EP4	protein_coding	0.533087	4.28945	11.3523	0.000753535	0.00664256
ENSG00000260916	CCPG1	protein_coding	-0.458707	5.30875	11.3456	0.000756252	0.00666155
ENSG00000023902	PLEKHO1	protein_coding	0.398702	6.75791	11.3421	0.000757713	0.00666525
ENSG00000282608	ADORA3	protein_coding	-0.83623	1.54135	11.3418	0.000757799	0.00666525
ENSG00000105472	CLEC11A	protein_coding	0.390463	7.10745	11.3324	0.000761657	0.00669421
ENSG00000186298	PPP1CC	protein_coding	-0.374522	8.32703	11.3282	0.000763373	0.00670431
ENSG00000142512	SIGLEC10	protein_coding	0.496418	4.78359	11.3213	0.000766223	0.00672435
ENSG00000147419	CCDC25	protein_coding	-0.427839	5.79815	11.31	0.00077092	0.00676055
ENSG00000143344	RGL1	protein_coding	0.630915	3.23475	11.3035	0.000773601	0.00677903
ENSG00000140403	DNAJA4	protein_coding	-0.469876	5.13892	11.3002	0.000774997	0.00678625
ENSG00000145386	CCNA2	protein_coding	0.395036	6.89003	11.2881	0.000780055	0.00682068
ENSG00000107249	GLIS3	protein_coding	-1.43053	-0.784179	11.288	0.000780083	0.00682068
ENSG00000149922	TBX6	protein_coding	-0.816472	1.64543	11.2852	0.000781286	0.00682615
ENSG00000173559	NABP1	protein_coding	-0.472838	5.08677	11.2776	0.00078446	0.00684883
ENSG00000125384	PTGER2	protein_coding	-0.475327	5.0577	11.2717	0.000786987	0.00686582
ENSG00000110925	CSRNP2	protein_coding	0.449354	5.43998	11.2622	0.000790998	0.00689573
ENSG00000143369	ECM1	protein_coding	-0.529669	4.25977	11.232	0.000804008	0.00700195
ENSG00000124313	IQSEC2	protein_coding	0.672681	2.92425	11.2303	0.000804712	0.00700195
ENSG00000155011	DKK2	protein_coding	0.607773	3.42273	11.2298	0.000804958	0.00700195
ENSG00000198791	CNOT7	protein_coding	-0.380956	7.55597	11.2129	0.000812307	0.00706068
ENSG00000075790	BCAP29	protein_coding	-0.424008	5.85864	11.2109	0.000813162	0.00706293
ENSG00000135245	HILPDA	protein_coding	-0.495091	4.74421	11.2031	0.000816628	0.00708783
ENSG00000067048	DDX3Y	protein_coding	-0.385204	7.24592	11.1923	0.000821372	0.00712378
ENSG00000152804	HHEX	protein_coding	-0.434444	5.6402	11.1831	0.000825436	0.00715377
ENSG00000169047	IRS1	protein_coding	-0.744601	2.16594	11.1776	0.000827898	0.00716986
ENSG00000257335	MGAM	protein_coding	-0.667351	2.79353	11.1752	0.000828987	0.00717405
ENSG00000104093	DMXL2	protein_coding	-0.400186	6.60345	11.1705	0.000831088	0.00718495
ENSG00000121864	ZNF639	protein_coding	-0.416362	6.06075	11.1697	0.000831462	0.00718495
ENSG00000196152	ZNF79	protein_coding	0.647999	3.0439	11.167	0.000832647	0.00718993
ENSG00000130707	ASS1	protein_coding	-0.405075	6.4248	11.1647	0.000833706	0.00719251
ENSG00000156802	ATAD2	protein_coding	-0.382707	7.42946	11.1636	0.000834161	0.00719251
ENSG00000185022	MAFF	protein_coding	-0.641172	3.01616	11.1607	0.00083547	0.00719855
ENSG00000160606	TLCD1	protein_coding	-0.830354	1.52747	11.1463	0.000842003	0.00724956
ENSG00000173085	COQ2	protein_coding	-0.501975	4.62542	11.1371	0.000846193	0.00728034
ENSG00000075218	GTSE1	protein_coding	0.42402	5.85562	11.1342	0.000847519	0.00728644
ENSG00000124688	MAD2L1BP	protein_coding	0.419168	5.97365	11.1305	0.000849186	0.00729548
ENSG00000182621	PLCB1	protein_coding	-0.722804	2.28251	11.1258	0.000851352	0.00730878
ENSG00000183763	TRAIP	protein_coding	0.533063	4.24419	11.1017	0.000862482	0.00739895
ENSG00000072786	STK10	protein_coding	0.374764	7.94785	11.0992	0.00086363	0.00740344
ENSG00000171757	LRRC34	protein_coding	-0.579447	3.68304	11.0896	0.000868121	0.00743655
ENSG00000138061	CYP1B1	protein_coding	-0.547415	3.9849	11.088	0.00086887	0.00743757
ENSG00000164362	TERT	protein_coding	0.934876	1.43901	11.0865	0.000869599	0.00743844
ENSG00000111058	ACSS3	protein_coding	-1.29829	-0.430985	11.078	0.000873601	0.00746727
ENSG00000196586	MYO6	protein_coding	-1.01434	0.705231	11.0731	0.000875904	0.00748154
ENSG00000185800	DMWD	protein_coding	0.859652	1.46646	11.0679	0.000878349	0.00749702
ENSG00000069399	BCL3	protein_coding	0.614718	3.28059	11.0539	0.000885008	0.00754841
ENSG00000171109	MFN1	protein_coding	-0.43016	5.67116	11.0503	0.000886726	0.00755761
ENSG00000186687	LYRM7	protein_coding	-0.44636	5.40673	11.0248	0.000898994	0.00765666
ENSG00000196975	ANXA4	protein_coding	0.402135	6.44234	11.0205	0.000901104	0.00766911
ENSG00000164076	CAMKV	protein_coding	-1.21006	-0.236207	11.0183	0.000902179	0.00767274
ENSG00000235162	C12orf75	protein_coding	0.404038	6.36482	10.9998	0.000911219	0.00774405
ENSG00000083444	PLOD1	protein_coding	-0.387333	6.9501	10.9803	0.000920878	0.00782052
ENSG00000154767	XPC	protein_coding	0.427103	5.70474	10.9622	0.000929909	0.00789156
ENSG00000176055	MBLAC2	protein_coding	-0.657569	2.88321	10.9586	0.000931694	0.00789764
ENSG00000189079	ARID2	protein_coding	0.389652	6.85699	10.9581	0.000931962	0.00789764
ENSG00000006459	KDM7A	protein_coding	-0.68912	2.53092	10.9548	0.000933595	0.00790582
ENSG00000182568	SATB1	protein_coding	0.374245	7.76205	10.9343	0.000943978	0.00798264
ENSG00000116032	GRIN3B	protein_coding	1.18956	0.226345	10.9343	0.000944017	0.00798264
ENSG00000185697	MYBL1	protein_coding	-0.683293	2.65613	10.9236	0.00094947	0.00802302
ENSG00000100065	CARD10	protein_coding	1.33922	-0.372237	10.9138	0.000954524	0.00805997
ENSG00000111666	CHPT1	protein_coding	-0.466075	5.07878	10.9104	0.000956279	0.00806486
ENSG00000105559	PLEKHA4	protein_coding	-1.06683	0.266079	10.9089	0.000957014	0.00806486
ENSG00000134256	CD101	protein_coding	-0.540644	4.0032	10.9087	0.000957148	0.00806486
ENSG00000007312	CD79B	protein_coding	-0.728475	2.19394	10.9011	0.000961084	0.00809195
ENSG00000115866	DARS	protein_coding	-0.38645	6.92457	10.8998	0.000961731	0.00809195
ENSG00000170043	TRAPPC1	protein_coding	0.388241	6.85633	10.8791	0.000972538	0.00817706
ENSG00000119401	TRIM32	protein_coding	0.49264	4.69648	10.8754	0.000974493	0.00818503
ENSG00000126016	AMOT	protein_coding	-0.989042	0.600705	10.8743	0.000975074	0.00818503
ENSG00000103313	MEFV	protein_coding	-0.437823	5.49197	10.8734	0.000975561	0.00818503
ENSG00000124802	EEF1E1	protein_coding	-0.528107	4.17215	10.8703	0.000977191	0.00819114
ENSG00000108774	RAB5C	protein_coding	0.426374	5.69022	10.8694	0.000977675	0.00819114
ENSG00000070182	SPTB	protein_coding	0.519112	4.32812	10.8631	0.000981009	0.00821326
ENSG00000134057	CCNB1	protein_coding	0.380217	7.20203	10.8591	0.00098314	0.00822528
ENSG00000162086	ZNF75A	protein_coding	-0.479509	4.87106	10.8533	0.000986201	0.00824506
ENSG00000058335	RASGRF1	protein_coding	0.741531	2.1849	10.8277	0.000999923	0.00835387
ENSG00000213160	KLHL23	protein_coding	0.525599	4.22713	10.8155	0.00100654	0.00840319
ENSG00000180316	PNPLA1	protein_coding	-0.59025	3.41915	10.8117	0.00100862	0.0084098
ENSG00000066117	SMARCD1	protein_coding	0.389896	6.73093	10.8114	0.00100875	0.0084098
ENSG00000176871	WSB2	protein_coding	0.427885	5.63971	10.789	0.00102105	0.00850635
ENSG00000104853	CLPTM1	protein_coding	0.398139	6.43255	10.7685	0.00103244	0.0085952
ENSG00000107140	TESK1	protein_coding	0.501717	4.5405	10.7429	0.0010468	0.00870863
ENSG00000169359	SLC33A1	protein_coding	-0.527493	4.12297	10.7377	0.00104977	0.00872718
ENSG00000228486	C2orf92	protein_coding	-0.675555	2.5532	10.7097	0.00106578	0.00885403
ENSG00000167291	TBC1D16	protein_coding	-1.60233	-0.853435	10.7058	0.00106798	0.00886607
ENSG00000186638	KIF24	protein_coding	0.48384	4.81443	10.6987	0.00107212	0.00889423
ENSG00000100448	CTSG	protein_coding	-0.353214	9.59284	10.6963	0.00107349	0.00889936
ENSG00000155252	PI4K2A	protein_coding	-0.497538	4.53608	10.6945	0.00107456	0.00890203
ENSG00000197971	MBP	protein_coding	0.372795	7.50902	10.6821	0.00108177	0.00895269
ENSG00000077097	TOP2B	protein_coding	-0.360189	8.7353	10.6814	0.00108219	0.00895269
ENSG00000172081	MOB3A	protein_coding	0.361653	8.52386	10.6781	0.0010841	0.0089622
ENSG00000111911	HINT3	protein_coding	-0.432084	5.51509	10.6734	0.0010869	0.00897904
ENSG00000118292	C1orf54	protein_coding	-0.462541	5.04791	10.6656	0.00109147	0.00901053
ENSG00000166851	PLK1	protein_coding	0.380204	7.03071	10.6484	0.00110168	0.00908846
ENSG00000073111	MCM2	protein_coding	0.379558	7.07918	10.6431	0.0011048	0.00910231
ENSG00000158987	RAPGEF6	protein_coding	-0.572188	3.56793	10.643	0.0011049	0.00910231
ENSG00000132563	REEP2	protein_coding	-1.0118	0.474822	10.6256	0.0011153	0.00918163
ENSG00000101336	HCK	protein_coding	0.366881	7.91816	10.6221	0.00111742	0.00919271
ENSG00000258083	OR9A4	protein_coding	-1.21368	-0.218973	10.6144	0.00112209	0.00922471
ENSG00000065675	PRKCQ	protein_coding	0.701519	2.39284	10.6079	0.00112608	0.0092481
ENSG00000169403	PTAFR	protein_coding	-0.3738	7.3318	10.6072	0.0011265	0.0092481
ENSG00000164087	POC1A	protein_coding	-0.432966	5.4751	10.5872	0.00113875	0.00934216
ENSG00000167548	KMT2D	protein_coding	0.361047	8.43392	10.5776	0.00114468	0.00938431
ENSG00000277462	ZNF670	protein_coding	-0.544365	3.85641	10.571	0.00114879	0.00941145
ENSG00000116991	SIPA1L2	protein_coding	0.51376	4.36076	10.564	0.00115313	0.0094405
ENSG00000136104	RNASEH2B	protein_coding	-0.374167	7.2279	10.5565	0.00115778	0.009472
ENSG00000077152	UBE2T	protein_coding	0.389229	6.56845	10.5393	0.00116863	0.00955415
ENSG00000158773	USF1	protein_coding	0.373881	7.24612	10.5368	0.00117021	0.00956045
ENSG00000133069	TMCC2	protein_coding	-1.01913	0.450442	10.5249	0.0011778	0.00961042
ENSG00000180233	ZNRF2	protein_coding	-0.557273	3.71633	10.5244	0.0011781	0.00961042
ENSG00000179761	PIPOX	protein_coding	0.76366	2.03357	10.5229	0.00117905	0.00961042
ENSG00000135269	TES	protein_coding	0.425319	5.58869	10.5221	0.00117957	0.00961042
ENSG00000235568	NFAM1	protein_coding	-0.3732	7.266	10.5179	0.00118225	0.00962564
ENSG00000146205	ANO7	protein_coding	0.575834	3.52846	10.4975	0.00119538	0.00972584
ENSG00000171943	SRGAP2C	protein_coding	-0.533467	3.97437	10.4915	0.00119924	0.0097505
ENSG00000067113	PLPP1	protein_coding	0.690618	2.64089	10.4862	0.00120271	0.00977201
ENSG00000160570	DEDD2	protein_coding	0.424594	5.59983	10.4805	0.00120642	0.00979541
ENSG00000163412	EIF4E3	protein_coding	0.744795	2.01912	10.475	0.00120999	0.00981765
ENSG00000117411	B4GALT2	protein_coding	-0.457871	5.07397	10.465	0.00121655	0.00986411
ENSG00000171914	TLN2	protein_coding	0.705537	2.38904	10.4625	0.00121824	0.00987111
ENSG00000164603	BMT2	protein_coding	-0.579098	3.42405	10.446	0.00122912	0.00995103
ENSG00000021762	OSBPL5	protein_coding	0.432635	5.44706	10.445	0.00122979	0.00995103
ENSG00000196365	LONP1	protein_coding	-0.37308	7.16012	10.4261	0.00124246	0.0100467
ENSG00000148019	CEP78	protein_coding	0.426233	5.53691	10.4161	0.0012492	0.0100943
ENSG00000185920	PTCH1	protein_coding	0.496264	4.49755	10.407	0.00125541	0.0101376
ENSG00000164300	SERINC5	protein_coding	-0.46039	5.01884	10.403	0.00125808	0.0101473
ENSG00000093009	CDC45	protein_coding	0.391941	6.43063	10.4027	0.00125833	0.0101473
ENSG00000170382	LRRN2	protein_coding	-0.667821	2.559	10.4012	0.00125935	0.0101486
ENSG00000129245	FXR2	protein_coding	0.438011	5.34152	10.3901	0.0012669	0.0102025
ENSG00000120925	RNF170	protein_coding	-0.487167	4.57192	10.3714	0.00127983	0.0102887
ENSG00000003096	KLHL13	protein_coding	0.621629	3.07547	10.3711	0.00128006	0.0102887
ENSG00000013375	PGM3	protein_coding	-0.439819	5.28533	10.3708	0.00128022	0.0102887
ENSG00000100726	TELO2	protein_coding	0.426783	5.54965	10.3638	0.00128513	0.0103211
ENSG00000183486	MX2	protein_coding	-0.433968	5.3675	10.3488	0.00129558	0.010398
ENSG00000228474	OST4	protein_coding	0.382639	6.67498	10.331	0.00130812	0.0104916
ENSG00000133216	EPHB2	protein_coding	-0.677162	2.51048	10.3227	0.00131405	0.0105319
ENSG00000175224	ATG13	protein_coding	0.353979	8.68944	10.3118	0.00132182	0.0105871
ENSG00000188522	FAM83G	protein_coding	0.485207	4.6486	10.2945	0.00133426	0.0106795
ENSG00000258366	RTEL1	protein_coding	0.909371	1.13066	10.2866	0.00134003	0.0107184
ENSG00000104388	RAB2A	protein_coding	-0.388692	6.41671	10.2851	0.00134107	0.0107195
ENSG00000131969	ABHD12B	protein_coding	-0.664998	2.52102	10.2826	0.00134289	0.0107214
ENSG00000185090	MANEAL	protein_coding	-0.60519	3.16409	10.2823	0.00134312	0.0107214
ENSG00000116729	WLS	protein_coding	-1.05224	0.491043	10.2656	0.00135534	0.0108117
ENSG00000066855	MTFR1	protein_coding	-0.475541	4.72195	10.2599	0.00135955	0.0108379
ENSG00000131389	SLC6A6	protein_coding	0.372713	7.05045	10.2551	0.00136308	0.0108587
ENSG00000109775	UFSP2	protein_coding	-0.595538	3.19816	10.2508	0.00136628	0.0108749
ENSG00000088836	SLC4A11	protein_coding	-0.758154	1.82545	10.2499	0.00136695	0.0108749
ENSG00000176890	TYMS	protein_coding	0.380712	6.68166	10.2475	0.00136871	0.0108793
ENSG00000164466	SFXN1	protein_coding	-0.375896	6.87305	10.2466	0.00136934	0.0108793
ENSG00000151849	CENPJ	protein_coding	0.399573	6.05079	10.2396	0.00137458	0.0109136
ENSG00000141384	TAF4B	protein_coding	-0.489879	4.47663	10.2311	0.00138096	0.0109517
ENSG00000177943	MAMDC4	protein_coding	0.466315	4.91286	10.2307	0.00138123	0.0109517
ENSG00000107263	RAPGEF1	protein_coding	0.368811	7.22096	10.2176	0.00139108	0.0110225
ENSG00000198833	UBE2J1	protein_coding	-0.356167	8.25671	10.2115	0.00139569	0.0110515
ENSG00000166428	PLD4	protein_coding	0.374555	6.91314	10.1989	0.00140524	0.0111197
ENSG00000128524	ATP6V1F	protein_coding	-0.387385	6.41147	10.1967	0.00140689	0.0111254
ENSG00000174837	ADGRE1	protein_coding	0.840924	1.33938	10.1936	0.00140931	0.011137
ENSG00000128283	CDC42EP1	protein_coding	-0.635552	2.83136	10.1735	0.00142477	0.0112517
ENSG00000116871	MAP7D1	protein_coding	0.377159	6.7559	10.1433	0.00144828	0.0114297
ENSG00000118508	RAB32	protein_coding	-0.413638	5.63865	10.135	0.00145481	0.0114687
ENSG00000091262	ABCC6	protein_coding	-1.19119	-0.162122	10.1345	0.00145516	0.0114687
ENSG00000155307	SAMSN1	protein_coding	-0.468801	4.79329	10.1322	0.00145702	0.0114746
ENSG00000140968	IRF8	protein_coding	-0.352871	8.45609	10.1311	0.00145785	0.0114746
ENSG00000101639	CEP192	protein_coding	0.392284	6.22143	10.1248	0.00146289	0.0115067
ENSG00000205707	ETFRF1	protein_coding	-0.555842	3.59985	10.1211	0.00146585	0.0115223
ENSG00000250067	YJEFN3	protein_coding	0.497097	4.36536	10.1171	0.00146899	0.0115393
ENSG00000184293	CLECL1	protein_coding	0.501177	4.29202	10.1078	0.0014764	0.0115898
ENSG00000101445	PPP1R16B	protein_coding	0.378948	6.64976	10.0998	0.00148283	0.0116326
ENSG00000276180	HIST1H4I	protein_coding	-0.450129	5.05685	10.0982	0.00148415	0.0116352
ENSG00000141526	SLC16A3	protein_coding	-0.368299	7.08667	10.0902	0.00149064	0.0116783
ENSG00000174695	TMEM167A	protein_coding	-0.357925	7.83468	10.0634	0.00151241	0.0118358
ENSG00000104763	ASAH1	protein_coding	-0.37854	6.62201	10.063	0.00151274	0.0118358
ENSG00000024422	EHD2	protein_coding	-0.952041	0.605673	10.0588	0.00151618	0.0118549
ENSG00000149212	SESN3	protein_coding	-0.457095	4.941	10.0497	0.00152377	0.0119026
ENSG00000157657	ZNF618	protein_coding	0.521496	4.0304	10.049	0.0015243	0.0119026
ENSG00000178719	GRINA	protein_coding	-0.367089	7.1191	10.0398	0.00153197	0.0119546
ENSG00000136982	DSCC1	protein_coding	-0.447645	5.06529	10.0342	0.00153658	0.0119827
ENSG00000149150	SLC43A1	protein_coding	-0.378583	6.61047	10.0304	0.00153975	0.0119995
ENSG00000166471	TMEM41B	protein_coding	-0.452781	4.98245	10.014	0.00155354	0.012099
ENSG00000123684	LPGAT1	protein_coding	0.37046	6.93792	10.0016	0.00156401	0.0121725
ENSG00000165792	METTL17	protein_coding	0.372394	6.84667	9.99584	0.00156894	0.0121962
ENSG00000158882	TOMM40L	protein_coding	0.390363	6.20271	9.99563	0.00156912	0.0121962
ENSG00000082805	ERC1	protein_coding	0.445816	5.10007	9.99074	0.0015733	0.0122198
ENSG00000104205	SGK3	protein_coding	-0.392459	6.10979	9.98966	0.00157422	0.0122198
ENSG00000159208	CIART	protein_coding	-0.684729	2.27561	9.9865	0.00157692	0.0122327
ENSG00000205268	PDE7A	protein_coding	-0.382835	6.41918	9.98216	0.00158064	0.0122503
ENSG00000180815	MAP3K15	protein_coding	-1.11846	-0.0970789	9.98072	0.00158188	0.0122503
ENSG00000142102	PGGHG	protein_coding	0.421266	5.47372	9.98025	0.00158228	0.0122503
ENSG00000173267	SNCG	protein_coding	-1.31341	-0.650407	9.97568	0.00158621	0.0122672
ENSG00000110002	VWA5A	protein_coding	-0.656028	2.51088	9.97529	0.00158655	0.0122672
ENSG00000133606	MKRN1	protein_coding	-0.372776	6.77908	9.97025	0.0015909	0.0122858
ENSG00000111667	USP5	protein_coding	0.368913	6.98082	9.96906	0.00159193	0.0122858
ENSG00000008282	SYPL1	protein_coding	-0.374502	6.70973	9.9689	0.00159207	0.0122858
ENSG00000136158	SPRY2	protein_coding	0.407293	5.71148	9.96674	0.00159393	0.0122922
ENSG00000101361	NOP56	protein_coding	0.348543	8.59286	9.95179	0.00160693	0.0123844
ENSG00000054219	LY75	protein_coding	-0.473989	4.63125	9.94668	0.0016114	0.0124107
ENSG00000140983	RHOT2	protein_coding	0.377274	6.60756	9.93313	0.0016233	0.0124943
ENSG00000215784	FAM72D	protein_coding	-0.57493	3.38538	9.92495	0.00163053	0.0125417
ENSG00000172594	SMPDL3A	protein_coding	-0.476871	4.56732	9.92165	0.00163346	0.0125561
ENSG00000123159	GIPC1	protein_coding	0.663627	2.59139	9.90364	0.00164952	0.0126713
ENSG00000162194	LBHD1	protein_coding	-0.490385	4.35028	9.89771	0.00165485	0.012704
ENSG00000197776	KLHDC1	protein_coding	-0.993339	0.372885	9.89215	0.00165985	0.0127335
ENSG00000204852	TCTN1	protein_coding	0.478674	4.54996	9.89106	0.00166084	0.0127335
ENSG00000076248	UNG	protein_coding	0.376183	6.59994	9.8817	0.00166931	0.0127901
ENSG00000096060	FKBP5	protein_coding	0.369911	6.85218	9.87931	0.00167148	0.0127984
ENSG00000186998	EMID1	protein_coding	0.5139	4.04512	9.85853	0.00169046	0.0129354
ENSG00000183018	SPNS2	protein_coding	0.553986	3.55074	9.8563	0.00169251	0.0129428
ENSG00000070669	ASNS	protein_coding	-0.947056	0.555866	9.84326	0.00170455	0.013025
ENSG00000219626	FAM228B	protein_coding	-0.63726	2.66498	9.84226	0.00170548	0.013025
ENSG00000075407	ZNF37A	protein_coding	0.386506	6.21568	9.83759	0.00170981	0.0130497
ENSG00000163131	CTSS	protein_coding	0.359064	7.3974	9.82926	0.00171757	0.0131005
ENSG00000129657	SEC14L1	protein_coding	0.376268	6.57202	9.8265	0.00172015	0.0131117
ENSG00000073756	PTGS2	protein_coding	0.476334	4.60518	9.81272	0.00173309	0.0131936
ENSG00000113532	ST8SIA4	protein_coding	-0.372781	6.66202	9.81269	0.00173312	0.0131936
ENSG00000156735	BAG4	protein_coding	-0.431787	5.22772	9.81132	0.00173441	0.0131949
ENSG00000186642	PDE2A	protein_coding	-2.03674	-1.47033	9.80601	0.00173943	0.0132246
ENSG00000134884	ARGLU1	protein_coding	-0.35915	7.32638	9.79972	0.00174539	0.0132614
ENSG00000133706	LARS	protein_coding	-0.348091	8.33267	9.79375	0.00175106	0.0132959
ENSG00000101439	CST3	protein_coding	0.355776	7.58908	9.78752	0.00175701	0.0133325
ENSG00000213658	LAT	protein_coding	0.702183	2.22939	9.78135	0.00176291	0.0133688
ENSG00000153140	CETN3	protein_coding	-0.466265	4.67838	9.77965	0.00176454	0.0133725
ENSG00000169258	GPRIN1	protein_coding	-0.744292	1.7776	9.77753	0.00176658	0.0133794
ENSG00000130816	DNMT1	protein_coding	0.348282	8.28893	9.7698	0.00177402	0.0134271
ENSG00000064225	ST3GAL6	protein_coding	-0.387934	6.10444	9.76591	0.00177778	0.013447
ENSG00000152270	PDE3B	protein_coding	-0.391459	5.98984	9.76297	0.00178062	0.0134599
ENSG00000110955	ATP5F1B	protein_coding	0.329188	11.1733	9.74304	0.00180003	0.013598
ENSG00000182534	MXRA7	protein_coding	-0.505012	4.08097	9.73702	0.00180593	0.0136338
ENSG00000104325	DECR1	protein_coding	-0.378877	6.3785	9.71928	0.00182345	0.0137573
ENSG00000183691	NOG	protein_coding	0.687048	2.24653	9.7125	0.00183019	0.0137993
ENSG00000010361	FUZ	protein_coding	-0.569739	3.29799	9.68505	0.00185773	0.0139956
ENSG00000178252	WDR6	protein_coding	-0.364086	6.94202	9.68421	0.00185858	0.0139956
ENSG00000101000	PROCR	protein_coding	-0.445528	4.97853	9.67648	0.00186642	0.0140457
ENSG00000177879	AP3S1	protein_coding	-0.377693	6.38958	9.67213	0.00187084	0.01407
ENSG00000183401	CCDC159	protein_coding	-0.492278	4.23547	9.66171	0.00188149	0.0141375
ENSG00000134108	ARL8B	protein_coding	-0.349856	7.90218	9.661	0.00188221	0.0141375
ENSG00000129484	PARP2	protein_coding	0.441773	5.03495	9.65004	0.00189347	0.0141977
ENSG00000118564	FBXL5	protein_coding	-0.363623	6.92593	9.64963	0.0018939	0.0141977
ENSG00000111331	OAS3	protein_coding	-0.417823	5.39463	9.64861	0.00189495	0.0141977
ENSG00000198682	PAPSS2	protein_coding	-0.582908	3.14715	9.64853	0.00189503	0.0141977
ENSG00000173273	TNKS	protein_coding	-0.402502	5.64445	9.60492	0.00194057	0.0145297
ENSG00000148841	ITPRIP	protein_coding	-0.414382	5.44677	9.60373	0.00194183	0.0145299
ENSG00000179630	LACC1	protein_coding	0.50113	4.1064	9.59388	0.00195227	0.0145925
ENSG00000078403	MLLT10	protein_coding	-0.388949	5.96172	9.59352	0.00195266	0.0145925
ENSG00000182185	RAD51B	protein_coding	-0.649101	2.46555	9.59052	0.00195585	0.0146071
ENSG00000104859	CLASRP	protein_coding	0.377187	6.37639	9.58876	0.00195772	0.0146119
ENSG00000109436	TBC1D9	protein_coding	0.584101	3.222	9.58381	0.00196301	0.0146421
ENSG00000166734	CASC4	protein_coding	-0.386253	6.04253	9.57602	0.00197135	0.0146951
ENSG00000092964	DPYSL2	protein_coding	-0.355699	7.27354	9.5737	0.00197384	0.0147044
ENSG00000186074	CD300LF	protein_coding	0.372207	6.52524	9.56876	0.00197916	0.0147347
ENSG00000070371	CLTCL1	protein_coding	0.353301	7.47329	9.56682	0.00198125	0.014741
ENSG00000139180	NDUFA9	protein_coding	0.464313	4.65178	9.54837	0.00200127	0.014877
ENSG00000007866	TEAD3	protein_coding	0.692532	2.18389	9.54766	0.00200205	0.014877
ENSG00000163536	SERPINI1	protein_coding	-0.611293	2.823	9.54213	0.00200809	0.0149125
ENSG00000165480	SKA3	protein_coding	0.388545	5.9558	9.5367	0.00201403	0.0149473
ENSG00000165233	CARD19	protein_coding	-0.454058	4.81392	9.52937	0.00202209	0.0149977
ENSG00000000460	C1orf112	protein_coding	0.443793	4.98369	9.52681	0.00202492	0.0150092
ENSG00000097046	CDC7	protein_coding	-0.409913	5.47547	9.52359	0.00202847	0.0150262
ENSG00000181544	FANCB	protein_coding	0.542912	3.56041	9.52036	0.00203205	0.0150433
ENSG00000174233	ADCY6	protein_coding	-2.59503	-1.10915	9.50399	0.00205026	0.0151686
ENSG00000104714	ERICH1	protein_coding	-0.454491	4.77745	9.50257	0.00205184	0.0151708
ENSG00000160161	CILP2	protein_coding	-0.677093	2.22934	9.49725	0.0020578	0.0151964
ENSG00000111665	CDCA3	protein_coding	0.389971	5.8837	9.49718	0.00205788	0.0151964
ENSG00000174442	ZWILCH	protein_coding	0.39748	5.71298	9.4953	0.00205999	0.015197
ENSG00000164509	IL31RA	protein_coding	-0.805016	1.28318	9.49483	0.00206052	0.015197
ENSG00000004399	PLXND1	protein_coding	0.366633	6.67047	9.48401	0.00207271	0.0152773
ENSG00000081377	CDC14B	protein_coding	1.21428	-0.378983	9.47237	0.00208589	0.0153649
ENSG00000085999	RAD54L	protein_coding	0.427613	5.21166	9.46439	0.00209499	0.0154224
ENSG00000158050	DUSP2	protein_coding	0.532189	3.71582	9.45537	0.00210532	0.0154797
ENSG00000147535	PLPP5	protein_coding	-0.4746	4.42455	9.4553	0.0021054	0.0154797
ENSG00000148154	UGCG	protein_coding	0.429436	5.15841	9.4523	0.00210885	0.0154926
ENSG00000167747	C19orf48	protein_coding	0.361939	6.85352	9.4515	0.00210977	0.0154926
ENSG00000082996	RNF13	protein_coding	-0.407509	5.49059	9.43581	0.00212789	0.015616
ENSG00000122565	CBX3	protein_coding	-0.33675	8.89164	9.43257	0.00213165	0.0156339
ENSG00000149503	INCENP	protein_coding	0.376678	6.30984	9.43094	0.00213355	0.0156381
ENSG00000144355	DLX1	protein_coding	0.584555	3.11458	9.42897	0.00213584	0.0156452
ENSG00000198040	ZNF84	protein_coding	-0.404534	5.53514	9.42749	0.00213757	0.0156481
ENSG00000156052	GNAQ	protein_coding	-0.358527	6.97263	9.42415	0.00214146	0.015667
ENSG00000161955	TNFSF13	protein_coding	0.591275	3.05644	9.42169	0.00214434	0.0156783
ENSG00000143578	CREB3L4	protein_coding	-0.488815	4.19005	9.41921	0.00214725	0.0156899
ENSG00000149308	NPAT	protein_coding	0.426432	5.19958	9.41742	0.00214933	0.0156932
ENSG00000155096	AZIN1	protein_coding	-0.340969	8.37683	9.41655	0.00215035	0.0156932
ENSG00000020633	RUNX3	protein_coding	0.400704	5.60677	9.40441	0.00216465	0.0157827
ENSG00000134070	IRAK2	protein_coding	-0.704543	1.92873	9.40347	0.00216575	0.0157827
ENSG00000123395	ATG101	protein_coding	0.494696	4.18432	9.40274	0.00216662	0.0157827
ENSG00000079819	EPB41L2	protein_coding	0.353799	7.19683	9.39321	0.00217791	0.0158552
ENSG00000169504	CLIC4	protein_coding	-0.374665	6.31259	9.38417	0.00218867	0.0159238
ENSG00000150764	DIXDC1	protein_coding	-0.47516	4.39465	9.37602	0.00219842	0.015976
ENSG00000163803	PLB1	protein_coding	-0.470581	4.46637	9.37591	0.00219855	0.015976
ENSG00000205846	CLEC6A	protein_coding	-0.945131	0.511403	9.36285	0.00221428	0.0160738
ENSG00000081985	IL12RB2	protein_coding	0.428229	5.15142	9.36247	0.00221473	0.0160738
ENSG00000100297	MCM5	protein_coding	0.349275	7.48583	9.35822	0.00221987	0.0161012
ENSG00000107863	ARHGAP21	protein_coding	0.585822	3.15487	9.35149	0.00222805	0.0161506
ENSG00000132780	NASP	protein_coding	-0.339927	8.33966	9.34558	0.00223524	0.0161928
ENSG00000164241	C5orf63	protein_coding	0.51839	3.81359	9.34099	0.00224084	0.0162235
ENSG00000139508	SLC46A3	protein_coding	-0.520934	3.75015	9.33356	0.00224995	0.0162726
ENSG00000198829	SUCNR1	protein_coding	-0.526677	3.65575	9.33307	0.00225055	0.0162726
ENSG00000105514	RAB3D	protein_coding	-0.411947	5.36822	9.33209	0.00225175	0.0162726
ENSG00000162337	LRP5	protein_coding	0.401314	5.58708	9.32839	0.00225631	0.0162919
ENSG00000172824	CES4A	protein_coding	-0.616431	2.71229	9.32768	0.00225718	0.0162919
ENSG00000146263	MMS22L	protein_coding	0.374803	6.31202	9.32541	0.00225998	0.0163022
ENSG00000133985	TTC9	protein_coding	0.914652	0.755843	9.31353	0.00227468	0.0163982
ENSG00000206560	ANKRD28	protein_coding	-0.373736	6.2718	9.29944	0.00229224	0.0165148
ENSG00000109685	NSD2	protein_coding	0.344572	7.8076	9.29685	0.00229548	0.016528
ENSG00000105339	DENND3	protein_coding	-0.344135	7.81459	9.29544	0.00229725	0.0165307
ENSG00000025796	SEC63	protein_coding	-0.340082	8.20238	9.28056	0.00231599	0.0166532
ENSG00000116191	RALGPS2	protein_coding	0.605939	2.82436	9.27969	0.00231709	0.0166532
ENSG00000153246	PLA2R1	protein_coding	-0.679615	2.11049	9.27374	0.00232463	0.0166972
ENSG00000116285	ERRFI1	protein_coding	-0.891515	0.768163	9.2724	0.00232633	0.0166993
ENSG00000137207	YIPF3	protein_coding	0.361817	6.6897	9.25927	0.00234306	0.0168092
ENSG00000151917	BEND6	protein_coding	0.56097	3.29013	9.2531	0.00235097	0.0168557
ENSG00000164574	GALNT10	protein_coding	0.389699	5.764	9.25157	0.00235294	0.0168596
ENSG00000224877	NDUFAF8	protein_coding	0.413213	5.33422	9.2487	0.00235663	0.0168758
ENSG00000166224	SGPL1	protein_coding	0.387674	5.7936	9.24111	0.00236642	0.0169302
ENSG00000007968	E2F2	protein_coding	0.445147	4.86013	9.24059	0.00236708	0.0169302
ENSG00000156127	BATF	protein_coding	0.445408	4.85156	9.23172	0.00237858	0.0170022
ENSG00000143819	EPHX1	protein_coding	0.463758	4.54913	9.22718	0.00238449	0.0170341
ENSG00000147570	DNAJC5B	protein_coding	-0.877667	0.75533	9.22402	0.0023886	0.0170532
ENSG00000139998	RAB15	protein_coding	0.433689	5.01454	9.21442	0.00240116	0.0171325
ENSG00000204923	FBXO48	protein_coding	-0.626626	2.63295	9.21001	0.00240695	0.0171635
ENSG00000137409	MTCH1	protein_coding	0.343795	7.6515	9.18713	0.00243723	0.0173673
ENSG00000197930	ERO1A	protein_coding	-0.354942	6.91228	9.1862	0.00243847	0.0173673
ENSG00000256235	SMIM3	protein_coding	-0.367126	6.42024	9.18493	0.00244016	0.0173689
ENSG00000172725	CORO1B	protein_coding	0.387285	5.80195	9.18203	0.00244403	0.0173779
ENSG00000105738	SIPA1L3	protein_coding	0.458824	4.60419	9.18178	0.00244436	0.0173779
ENSG00000126461	SCAF1	protein_coding	0.403727	5.47398	9.16346	0.00246895	0.0175421
ENSG00000135077	HAVCR2	protein_coding	-0.778124	1.42526	9.15856	0.00247558	0.0175787
ENSG00000154358	OBSCN	protein_coding	0.607627	2.82705	9.15184	0.00248468	0.0176327
ENSG00000203668	CHML	protein_coding	0.366033	6.47993	9.14782	0.00249014	0.0176609
ENSG00000285976	AL135905.2	protein_coding	1.28987	-0.127167	9.14585	0.00249282	0.0176687
ENSG00000113070	HBEGF	protein_coding	0.460049	4.55406	9.14482	0.00249424	0.0176687
ENSG00000188177	ZC3H6	protein_coding	-0.532614	3.51625	9.13444	0.00250843	0.0177586
ENSG00000175203	DCTN2	protein_coding	0.351304	7.04646	9.13057	0.00251373	0.0177855
ENSG00000072071	ADGRL1	protein_coding	0.628079	2.66133	9.11757	0.00253167	0.0179017
ENSG00000114248	LRRC31	protein_coding	-0.950956	0.389192	9.1122	0.0025391	0.0179436
ENSG00000080839	RBL1	protein_coding	0.378748	6.01175	9.1076	0.0025455	0.0179781
ENSG00000068971	PPP2R5B	protein_coding	-0.532371	3.51849	9.10194	0.00255338	0.018023
ENSG00000112874	NUDT12	protein_coding	-0.514899	3.73742	9.09696	0.00256035	0.0180614
ENSG00000139546	TARBP2	protein_coding	0.381488	5.88602	9.08594	0.00257582	0.0181597
ENSG00000149554	CHEK1	protein_coding	0.382434	5.86034	9.07732	0.00258799	0.0182346
ENSG00000107738	VSIR	protein_coding	-0.345248	7.3765	9.0762	0.00258958	0.018235
ENSG00000182952	HMGN4	protein_coding	-0.345	7.36967	9.0742	0.00259241	0.018244
ENSG00000066322	ELOVL1	protein_coding	0.375358	6.0837	9.05975	0.00261298	0.0183778
ENSG00000150991	UBC	protein_coding	-0.323738	9.80886	9.051	0.00262551	0.018455
ENSG00000166562	SEC11C	protein_coding	0.373341	6.11716	9.04351	0.00263629	0.0185198
ENSG00000166508	MCM7	protein_coding	0.330198	8.83229	9.03141	0.00265379	0.0186308
ENSG00000113916	BCL6	protein_coding	-0.469259	4.3444	9.03041	0.00265524	0.0186308
ENSG00000104903	LYL1	protein_coding	-0.384347	5.7597	9.0254	0.00266253	0.0186709
ENSG00000175548	ALG10B	protein_coding	-0.513521	3.73383	9.02177	0.00266783	0.0186969
ENSG00000100714	MTHFD1	protein_coding	0.343215	7.4515	9.02047	0.00266973	0.0186991
ENSG00000170835	CEL	protein_coding	0.542757	3.41027	9.01028	0.00268465	0.0187832
ENSG00000197410	DCHS2	protein_coding	-0.837452	0.962032	9.01011	0.0026849	0.0187832
ENSG00000010278	CD9	protein_coding	0.56942	3.12585	9.00518	0.00269216	0.0188228
ENSG00000065809	FAM107B	protein_coding	-0.331327	8.56703	8.98607	0.00272045	0.0190094
ENSG00000139266	9-Mar	protein_coding	-0.414572	5.19822	8.96824	0.00274713	0.0191845
ENSG00000213965	NUDT19	protein_coding	-0.402548	5.38675	8.95559	0.00276622	0.0192967
ENSG00000119326	CTNNAL1	protein_coding	-0.466516	4.34133	8.95543	0.00276646	0.0192967
ENSG00000116128	BCL9	protein_coding	0.728159	1.75414	8.95167	0.00277216	0.0193251
ENSG00000163568	AIM2	protein_coding	-0.899828	0.590288	8.94968	0.00277518	0.0193347
ENSG00000214253	FIS1	protein_coding	0.364276	6.37481	8.94217	0.00278661	0.0194029
ENSG00000140104	CLBA1	protein_coding	-0.601351	2.73302	8.92942	0.00280614	0.0195274
ENSG00000184916	JAG2	protein_coding	0.951757	0.540136	8.91622	0.00282649	0.0196575
ENSG00000137216	TMEM63B	protein_coding	0.403638	5.36846	8.91448	0.00282919	0.0196647
ENSG00000105287	PRKD2	protein_coding	0.395833	5.50743	8.90168	0.00284908	0.0197894
ENSG00000104626	ERI1	protein_coding	-0.412798	5.20928	8.90078	0.00285048	0.0197894
ENSG00000182218	HHIPL1	protein_coding	0.841699	1.0014	8.89549	0.00285875	0.0198352
ENSG00000124831	LRRFIP1	protein_coding	-0.331647	8.32017	8.88684	0.00287234	0.0199178
ENSG00000142039	CCDC97	protein_coding	0.378016	5.85817	8.87685	0.0028881	0.0200077
ENSG00000079616	KIF22	protein_coding	0.358117	6.56512	8.87648	0.00288869	0.0200077
ENSG00000163297	ANTXR2	protein_coding	-0.349422	6.88495	8.87292	0.00289432	0.020035
ENSG00000178685	PARP10	protein_coding	-0.40443	5.32228	8.86702	0.00290369	0.0200809
ENSG00000174013	FBXO45	protein_coding	-0.351197	6.79888	8.8666	0.00290435	0.0200809
ENSG00000163507	CIP2A	protein_coding	0.388204	5.64094	8.86259	0.00291074	0.0201134
ENSG00000100346	CACNA1I	protein_coding	1.08578	-0.042675	8.85937	0.00291589	0.0201372
ENSG00000100106	TRIOBP	protein_coding	0.379414	5.79515	8.85553	0.00292203	0.0201678
ENSG00000160050	CCDC28B	protein_coding	-0.646875	2.30094	8.85126	0.00292887	0.0202032
ENSG00000254685	FPGT	protein_coding	-0.481527	4.08314	8.84188	0.00294396	0.0202955
ENSG00000125249	RAP2A	protein_coding	0.467258	4.32241	8.84055	0.0029461	0.0202984
ENSG00000177432	NAP1L5	protein_coding	-0.634624	2.35829	8.82147	0.00297706	0.0204996
ENSG00000165512	ZNF22	protein_coding	-0.399736	5.3826	8.82042	0.00297877	0.0204996
ENSG00000105246	EBI3	protein_coding	-0.486044	4.00774	8.8179	0.0029829	0.0205161
ENSG00000186469	GNG2	protein_coding	0.467807	4.38108	8.81011	0.00299566	0.0205919
ENSG00000167552	TUBA1A	protein_coding	-0.330395	8.2881	8.80869	0.00299799	0.020596
ENSG00000232859	LYRM9	protein_coding	-0.918874	0.454488	8.80602	0.00300238	0.0206142
ENSG00000111450	STX2	protein_coding	-0.396322	5.4333	8.79607	0.00301881	0.0207149
ENSG00000184343	SRPK3	protein_coding	0.655241	2.31913	8.79352	0.00302303	0.0207318
ENSG00000173548	SNX33	protein_coding	-0.46712	4.27745	8.79043	0.00302814	0.0207549
ENSG00000071282	LMCD1	protein_coding	0.865724	0.822938	8.78714	0.00303362	0.0207804
ENSG00000224940	PRRT4	protein_coding	-0.478	4.15167	8.77288	0.00305742	0.0209313
ENSG00000065154	OAT	protein_coding	0.372005	5.95952	8.75708	0.00308402	0.0211012
ENSG00000147601	TERF1	protein_coding	-0.42427	4.97143	8.75401	0.00308923	0.0211246
ENSG00000024862	CCDC28A	protein_coding	-0.414782	5.11096	8.75257	0.00309166	0.021129
ENSG00000155158	TTC39B	protein_coding	1.10186	-0.154297	8.74524	0.00310411	0.0212018
ENSG00000163975	MELTF	protein_coding	-0.453471	4.47482	8.74396	0.0031063	0.0212046
ENSG00000183091	NEB	protein_coding	-0.607068	2.57996	8.73793	0.00311658	0.0212582
ENSG00000139970	RTN1	protein_coding	-0.664771	2.07403	8.73725	0.00311774	0.0212582
ENSG00000128694	OSGEPL1	protein_coding	-0.514373	3.62722	8.73064	0.00312906	0.021323
ENSG00000146350	TBC1D32	protein_coding	-0.749257	1.44552	8.72389	0.00314068	0.0213899
ENSG00000171291	ZNF439	protein_coding	0.459989	4.37201	8.71663	0.0031532	0.0214628
ENSG00000104691	UBXN8	protein_coding	-0.42294	4.96874	8.69795	0.00318568	0.0216714
ENSG00000169255	B3GALNT1	protein_coding	-0.577731	2.99579	8.69648	0.00318825	0.0216765
ENSG00000128699	ORMDL1	protein_coding	-0.353383	6.56038	8.69273	0.00319481	0.0217086
ENSG00000078804	TP53INP2	protein_coding	-0.452431	4.46458	8.68913	0.00320113	0.021739
ENSG00000116005	PCYOX1	protein_coding	-0.383635	5.62428	8.68781	0.00320346	0.0217423
ENSG00000198554	WDHD1	protein_coding	0.378738	5.73471	8.68445	0.00320937	0.02177
ENSG00000151470	C4orf33	protein_coding	-0.540642	3.27889	8.68313	0.0032117	0.0217733
ENSG00000163913	IFT122	protein_coding	0.390219	5.51682	8.68174	0.00321414	0.0217774
ENSG00000187688	TRPV2	protein_coding	0.371156	5.94591	8.65448	0.00326259	0.022093
ENSG00000107672	NSMCE4A	protein_coding	-0.387998	5.5243	8.64899	0.00327244	0.022147
ENSG00000118922	KLF12	protein_coding	0.484309	3.99049	8.64312	0.00328299	0.0222057
ENSG00000203760	CENPW	protein_coding	-0.357651	6.35964	8.63769	0.00329278	0.0222592
ENSG00000164830	OXR1	protein_coding	-0.379524	5.69033	8.63142	0.00330413	0.0223232
ENSG00000103995	CEP152	protein_coding	0.372466	5.85482	8.62821	0.00330997	0.0223329
ENSG00000170734	POLH	protein_coding	0.370383	5.91918	8.62754	0.00331119	0.0223329
ENSG00000166619	BLCAP	protein_coding	0.372729	5.8509	8.62751	0.00331124	0.0223329
ENSG00000163257	DCAF16	protein_coding	0.397992	5.36446	8.61883	0.00332706	0.0224213
ENSG00000154743	TSEN2	protein_coding	-0.454012	4.4035	8.61824	0.00332813	0.0224213
ENSG00000139645	ANKRD52	protein_coding	0.346219	6.82293	8.61691	0.00333056	0.0224234
ENSG00000166321	NUDT13	protein_coding	-0.588508	2.72883	8.616	0.00333223	0.0224234
ENSG00000174721	FGFBP3	protein_coding	-0.672693	1.94705	8.60703	0.00334868	0.0225212
ENSG00000105383	CD33	protein_coding	0.337835	7.23506	8.60036	0.00336097	0.0225909
ENSG00000117266	CDK18	protein_coding	0.384378	5.59823	8.59908	0.00336332	0.0225909
ENSG00000070882	OSBPL3	protein_coding	0.410954	5.13469	8.59831	0.00336476	0.0225909
ENSG00000145365	TIFA	protein_coding	-0.433382	4.73978	8.58919	0.00338164	0.0226913
ENSG00000151490	PTPRO	protein_coding	-0.503715	3.6818	8.58538	0.00338873	0.022726
ENSG00000258461	AC012651.1	protein_coding	-0.625939	2.47411	8.5822	0.00339466	0.0227529
ENSG00000090372	STRN4	protein_coding	0.353577	6.49742	8.58031	0.00339818	0.0227635
ENSG00000110888	CAPRIN2	protein_coding	-0.476861	4.03848	8.57752	0.00340338	0.0227855
ENSG00000187742	SECISBP2	protein_coding	-0.370038	5.87649	8.57177	0.00341414	0.0228446
ENSG00000136280	CCM2	protein_coding	0.358063	6.29824	8.5427	0.0034691	0.0231992
ENSG00000167978	SRRM2	protein_coding	0.310875	10.5855	8.54039	0.00347351	0.0232156
ENSG00000170791	CHCHD7	protein_coding	-0.37079	5.82291	8.53458	0.00348462	0.0232767
ENSG00000159905	ZNF221	protein_coding	0.72749	1.75897	8.52164	0.00350949	0.0234125
ENSG00000124207	CSE1L	protein_coding	0.327249	8.05724	8.52146	0.00350983	0.0234125
ENSG00000072657	TRHDE	protein_coding	-0.416583	5.01122	8.52091	0.00351088	0.0234125
ENSG00000101096	NFATC2	protein_coding	0.351955	6.4866	8.5087	0.00353452	0.0235568
ENSG00000096872	IFT74	protein_coding	-0.450072	4.416	8.50318	0.00354526	0.0236151
ENSG00000168303	MPLKIP	protein_coding	-0.425163	4.86035	8.50088	0.00354975	0.0236317
ENSG00000159761	C16orf86	protein_coding	-0.740328	1.42114	8.49063	0.00356981	0.0237519
ENSG00000139278	GLIPR1	protein_coding	0.410264	5.10169	8.48508	0.0035807	0.023811
ENSG00000203880	PCMTD2	protein_coding	-0.513799	3.51264	8.47628	0.00359807	0.023913
ENSG00000188321	ZNF559	protein_coding	0.489223	3.85371	8.47319	0.00360419	0.0239402
ENSG00000123610	TNFAIP6	protein_coding	-0.738006	1.45378	8.4689	0.0036127	0.0239622
ENSG00000186792	HYAL3	protein_coding	-0.356604	6.2789	8.46863	0.00361323	0.0239622
ENSG00000156795	WDYHV1	protein_coding	-0.489971	3.80798	8.46846	0.00361358	0.0239622
ENSG00000040633	PHF23	protein_coding	0.356155	6.30526	8.46463	0.00362118	0.0239992
ENSG00000111875	ASF1A	protein_coding	-0.361192	6.09645	8.45738	0.00363564	0.0240816
ENSG00000129625	REEP5	protein_coding	0.360917	6.12765	8.45525	0.00363992	0.0240964
ENSG00000150593	PDCD4	protein_coding	-0.334338	7.25596	8.44959	0.00365125	0.0241456
ENSG00000171302	CANT1	protein_coding	0.347092	6.62899	8.4495	0.00365144	0.0241456
ENSG00000198502	HLA-DRB5	protein_coding	0.773248	1.36828	8.43721	0.00367621	0.0242958
ENSG00000205981	DNAJC19	protein_coding	-0.424396	4.83438	8.43262	0.0036855	0.0243436
ENSG00000244405	ETV5	protein_coding	-0.342692	6.78589	8.42846	0.00369392	0.0243857
ENSG00000161929	SCIMP	protein_coding	-0.464645	4.14889	8.41928	0.00371262	0.0244954
ENSG00000198089	SFI1	protein_coding	0.412479	5.05387	8.41123	0.0037291	0.02458
ENSG00000198909	MAP3K3	protein_coding	0.371516	5.76153	8.41099	0.0037296	0.02458
ENSG00000156521	TYSND1	protein_coding	-0.427812	4.78261	8.40685	0.0037381	0.0246223
ENSG00000112877	CEP72	protein_coding	0.547114	3.1966	8.40343	0.00374514	0.024655
ENSG00000101751	POLI	protein_coding	-0.427349	4.76275	8.4012	0.00374974	0.0246628
ENSG00000185480	PARPBP	protein_coding	0.424539	4.84088	8.40083	0.00375049	0.0246628
ENSG00000117676	RPS6KA1	protein_coding	0.318093	8.86187	8.3991	0.00375406	0.0246725
ENSG00000129422	MTUS1	protein_coding	-1.10185	-0.41062	8.39578	0.00376092	0.0247028
ENSG00000170464	DNAJC18	protein_coding	-0.561466	2.95107	8.39486	0.00376284	0.0247028
ENSG00000204020	LIPN	protein_coding	-1.06907	-0.194821	8.39348	0.00376569	0.0247078
ENSG00000198252	STYX	protein_coding	-0.368731	5.78725	8.38463	0.00378407	0.0248146
ENSG00000162512	SDC3	protein_coding	-0.683534	1.77387	8.3723	0.00380983	0.0249621
ENSG00000198574	SH2D1B	protein_coding	1.68615	-0.919209	8.37185	0.00381078	0.0249621
ENSG00000198131	ZNF544	protein_coding	-0.412111	5.00878	8.36578	0.00382353	0.0250317
ENSG00000117399	CDC20	protein_coding	0.334525	7.14336	8.36152	0.00383249	0.0250676
ENSG00000136854	STXBP1	protein_coding	0.421157	4.88239	8.36116	0.00383325	0.0250676
ENSG00000240891	PLCXD2	protein_coding	0.908806	0.540675	8.35804	0.00383984	0.0250969
ENSG00000114416	FXR1	protein_coding	-0.320324	8.46054	8.35594	0.00384429	0.0251121
ENSG00000188641	DPYD	protein_coding	-0.427669	4.74916	8.35285	0.00385083	0.0251409
ENSG00000113810	SMC4	protein_coding	0.321649	8.46517	8.34612	0.00386513	0.0252203
ENSG00000117533	VAMP4	protein_coding	-0.398731	5.21698	8.34279	0.00387221	0.0252339
ENSG00000105429	MEGF8	protein_coding	0.347445	6.53313	8.34241	0.00387303	0.0252339
ENSG00000100906	NFKBIA	protein_coding	0.367301	5.81546	8.34213	0.00387361	0.0252339
ENSG00000111206	FOXM1	protein_coding	0.345588	6.60356	8.33682	0.00388495	0.0252939
ENSG00000143228	NUF2	protein_coding	0.352376	6.33518	8.33567	0.00388742	0.025296
ENSG00000100116	GCAT	protein_coding	0.690824	1.82568	8.33302	0.00389308	0.0253189
ENSG00000179344	HLA-DQB1	protein_coding	0.58015	2.75619	8.33137	0.00389662	0.0253281
ENSG00000105771	SMG9	protein_coding	0.344153	6.64371	8.32961	0.0039004	0.0253387
ENSG00000181929	PRKAG1	protein_coding	0.34598	6.56533	8.32242	0.00391587	0.0254252
ENSG00000213741	RPS29	protein_coding	0.313554	9.24563	8.31882	0.00392364	0.0254617
ENSG00000113119	TMCO6	protein_coding	0.437234	4.61378	8.30908	0.00394473	0.0255845
ENSG00000165006	UBAP1	protein_coding	-0.346998	6.49242	8.29625	0.00397271	0.0257519
ENSG00000114541	FRMD4B	protein_coding	0.362859	5.94138	8.29486	0.00397574	0.0257574
ENSG00000117298	ECE1	protein_coding	0.526451	3.36796	8.29094	0.00398434	0.025799
ENSG00000164938	TP53INP1	protein_coding	-0.400459	5.16793	8.28905	0.00398849	0.0257997
ENSG00000135052	GOLM1	protein_coding	-0.355247	6.18306	8.2889	0.00398882	0.0257997
ENSG00000131724	IL13RA1	protein_coding	0.365078	5.84716	8.28724	0.00399247	0.0258092
ENSG00000198734	F5	protein_coding	-0.949001	0.241997	8.26832	0.00403428	0.0260557
ENSG00000114107	CEP70	protein_coding	0.460423	4.17024	8.268	0.00403499	0.0260557
ENSG00000164099	PRSS12	protein_coding	-0.965439	0.186574	8.26638	0.00403859	0.0260647
ENSG00000127022	CANX	protein_coding	-0.309094	9.87328	8.26299	0.00404615	0.026085
ENSG00000124733	MEA1	protein_coding	0.341538	6.69564	8.26299	0.00404615	0.026085
ENSG00000196235	SUPT5H	protein_coding	0.328485	7.44092	8.25925	0.00405449	0.0261245
ENSG00000145779	TNFAIP8	protein_coding	-0.334907	6.99441	8.25813	0.00405699	0.0261264
ENSG00000215114	UBXN2B	protein_coding	-0.35926	6.01141	8.25583	0.00406214	0.0261453
ENSG00000175536	LIPT2	protein_coding	-0.680765	1.76371	8.25241	0.00406979	0.0261803
ENSG00000092068	SLC7A8	protein_coding	0.720672	1.6019	8.25066	0.00407371	0.0261913
ENSG00000229474	PATL2	protein_coding	-0.759158	1.21232	8.24358	0.00408963	0.0262794
ENSG00000128394	APOBEC3F	protein_coding	-0.602407	2.45323	8.23899	0.00409999	0.0263317
ENSG00000117335	CD46	protein_coding	-0.313452	9.04993	8.23625	0.00410619	0.0263572
ENSG00000144401	METTL21A	protein_coding	-0.388933	5.33164	8.22893	0.00412278	0.0264493
ENSG00000174791	RIN1	protein_coding	-0.499144	3.6207	8.20666	0.00417368	0.0267613
ENSG00000117593	DARS2	protein_coding	0.327634	7.4153	8.20124	0.00418617	0.0268269
ENSG00000171236	LRG1	protein_coding	-0.349983	6.30693	8.19833	0.00419289	0.0268554
ENSG00000124772	CPNE5	protein_coding	1.04448	-0.075248	8.19667	0.00419673	0.0268654
ENSG00000152910	CNTNAP4	protein_coding	-0.566515	2.80354	8.19246	0.00420649	0.0269133
ENSG00000112320	SOBP	protein_coding	-0.473529	3.94408	8.18259	0.00422944	0.0270456
ENSG00000180822	PSMG4	protein_coding	-0.463975	4.07239	8.17977	0.00423602	0.027073
ENSG00000111424	VDR	protein_coding	0.340185	6.6746	8.17502	0.00424712	0.0271293
ENSG00000092445	TYRO3	protein_coding	0.447178	4.3418	8.16165	0.00427854	0.0273153
ENSG00000173868	PHOSPHO1	protein_coding	0.914482	0.494411	8.15952	0.00428358	0.0273243
ENSG00000146833	TRIM4	protein_coding	-0.428776	4.63	8.15909	0.00428458	0.0273243
ENSG00000224420	ADM5	protein_coding	0.758515	1.35326	8.1568	0.00429001	0.0273442
ENSG00000111335	OAS2	protein_coding	-0.346381	6.39335	8.14062	0.00432845	0.0275743
ENSG00000106804	C5	protein_coding	-0.575629	2.76631	8.13187	0.00434938	0.0276928
ENSG00000171657	GPR82	protein_coding	0.562484	2.94873	8.12863	0.00435715	0.0277273
ENSG00000169955	ZNF747	protein_coding	-0.583817	2.60394	8.12481	0.00436635	0.0277666
ENSG00000123728	RAP2C	protein_coding	-0.37531	5.54633	8.12332	0.00436995	0.0277666
ENSG00000184517	ZFP1	protein_coding	-0.490644	3.66748	8.12315	0.00437037	0.0277666
ENSG00000111554	MDM1	protein_coding	0.403472	5.06324	8.10236	0.00442077	0.0280718
ENSG00000198722	UNC13B	protein_coding	0.439841	4.44598	8.09713	0.00443353	0.0281229
ENSG00000136997	MYC	protein_coding	-0.315641	8.43791	8.09711	0.00443358	0.0281229
ENSG00000174891	RSRC1	protein_coding	-0.338727	6.6517	8.09399	0.00444124	0.0281564
ENSG00000103326	CAPN15	protein_coding	0.359988	5.93233	8.09064	0.00444946	0.028185
ENSG00000164920	OSR2	protein_coding	0.983372	0.404851	8.09021	0.00445051	0.028185
ENSG00000185567	AHNAK2	protein_coding	0.594533	2.58047	8.08639	0.00445989	0.0282293
ENSG00000068903	SIRT2	protein_coding	0.360376	5.86405	8.07812	0.00448028	0.028338
ENSG00000181104	F2R	protein_coding	-0.422449	4.75087	8.07749	0.00448186	0.028338
ENSG00000143515	ATP8B2	protein_coding	-0.506941	3.46656	8.06364	0.00451624	0.0285362
ENSG00000167107	ACSF2	protein_coding	0.422821	4.71014	8.06292	0.00451804	0.0285362
ENSG00000034677	RNF19A	protein_coding	-0.379078	5.4439	8.0522	0.00454484	0.0286902
ENSG00000170584	NUDCD2	protein_coding	-0.422355	4.68849	8.04031	0.00457477	0.0288562
ENSG00000156011	PSD3	protein_coding	-0.432485	4.50975	8.03953	0.00457674	0.0288562
ENSG00000105011	ASF1B	protein_coding	0.351921	6.12657	8.03885	0.00457845	0.0288562
ENSG00000196154	S100A4	protein_coding	0.312605	8.64714	8.03272	0.00459397	0.0289386
ENSG00000151690	MFSD6	protein_coding	-0.419569	4.7376	8.02868	0.00460424	0.0289857
ENSG00000130830	MPP1	protein_coding	-0.358996	5.8425	8.02785	0.00460636	0.0289857
ENSG00000029534	ANK1	protein_coding	-0.993661	-0.0838659	8.02336	0.00461779	0.0290423
ENSG00000137076	TLN1	protein_coding	0.306725	9.42575	8.02173	0.00462193	0.0290528
ENSG00000137414	FAM8A1	protein_coding	-0.432185	4.49801	8.02019	0.00462587	0.0290622
ENSG00000169251	NMD3	protein_coding	-0.325785	7.25534	8.01755	0.00463262	0.0290891
ENSG00000129993	CBFA2T3	protein_coding	0.392939	5.19441	8.01479	0.00463968	0.029118
ENSG00000090376	IRAK3	protein_coding	-0.318995	7.84074	8.00428	0.0046667	0.029272
ENSG00000059728	MXD1	protein_coding	-0.40799	4.92724	7.99809	0.00468267	0.0293567
ENSG00000160326	SLC2A6	protein_coding	0.445378	4.29634	7.99183	0.00469888	0.0294427
ENSG00000251369	ZNF550	protein_coding	0.427732	4.59386	7.97583	0.00474059	0.0296883
ENSG00000136518	ACTL6A	protein_coding	-0.326153	7.15201	7.97244	0.00474948	0.0297282
ENSG00000170412	GPRC5C	protein_coding	0.600942	2.4271	7.95337	0.0047998	0.0300273
ENSG00000168916	ZNF608	protein_coding	0.704246	1.62737	7.94961	0.00480977	0.0300738
ENSG00000106399	RPA3	protein_coding	-0.357665	5.82554	7.94736	0.00481577	0.0300954
ENSG00000137628	DDX60	protein_coding	-0.405951	4.94299	7.94566	0.00482028	0.0301077
ENSG00000163931	TKT	protein_coding	-0.307035	9.15044	7.94203	0.00482996	0.0301522
ENSG00000196268	ZNF493	protein_coding	-0.512313	3.34204	7.94029	0.00483462	0.0301654
ENSG00000139618	BRCA2	protein_coding	0.382464	5.36467	7.93607	0.00484589	0.0302198
ENSG00000121988	ZRANB3	protein_coding	-0.512446	3.32438	7.93002	0.00486214	0.0303051
ENSG00000178852	EFCAB13	protein_coding	-0.558554	2.78687	7.92422	0.00487773	0.0303863
ENSG00000095002	MSH2	protein_coding	0.3745	5.47532	7.92145	0.00488521	0.0304169
ENSG00000127483	HP1BP3	protein_coding	0.312373	8.37867	7.9037	0.00493338	0.0307006
ENSG00000111906	HDDC2	protein_coding	-0.326899	7.03308	7.90272	0.00493606	0.0307011
ENSG00000068079	IFI35	protein_coding	-0.408862	4.87655	7.89954	0.00494474	0.0307357
ENSG00000113269	RNF130	protein_coding	0.33008	6.87239	7.89878	0.0049468	0.0307357
ENSG00000184661	CDCA2	protein_coding	-0.364656	5.65359	7.89689	0.00495199	0.0307518
ENSG00000165672	PRDX3	protein_coding	-0.311809	8.41069	7.89505	0.00495704	0.0307669
ENSG00000092067	CEBPE	protein_coding	-0.447006	4.21552	7.89369	0.00496074	0.0307738
ENSG00000129467	ADCY4	protein_coding	0.473435	3.84203	7.88657	0.00498032	0.030879
ENSG00000197046	SIGLEC15	protein_coding	-0.941977	0.0776378	7.87559	0.00501066	0.0310509
ENSG00000274349	ZNF658	protein_coding	-0.583092	2.50567	7.86765	0.0050327	0.0311711
ENSG00000008405	CRY1	protein_coding	-0.907217	0.409401	7.86266	0.0050466	0.0312148
ENSG00000145685	LHFPL2	protein_coding	-0.376145	5.40675	7.86238	0.0050474	0.0312148
ENSG00000172123	SLFN12	protein_coding	0.478138	3.7802	7.86228	0.00504767	0.0312148
ENSG00000153879	CEBPG	protein_coding	-0.330579	6.79348	7.8568	0.00506299	0.0312932
ENSG00000166527	CLEC4D	protein_coding	-0.540297	2.98335	7.85287	0.00507402	0.031345
ENSG00000170855	TRIAP1	protein_coding	0.347661	6.11485	7.84868	0.00508578	0.0313977
ENSG00000101280	ANGPT4	protein_coding	1.09373	-0.269379	7.84794	0.00508786	0.0313977
ENSG00000119048	UBE2B	protein_coding	-0.34945	6.03872	7.84384	0.00509943	0.0314496
ENSG00000183682	BMP8A	protein_coding	-0.583378	2.51106	7.84307	0.00510158	0.0314496
ENSG00000136717	BIN1	protein_coding	-0.632088	2.1917	7.83769	0.0051168	0.031527
ENSG00000136521	NDUFB5	protein_coding	-0.315805	7.80989	7.83654	0.00512006	0.0315306
ENSG00000157999	ANKRD61	protein_coding	0.797004	1.07262	7.82306	0.00515837	0.03175
ENSG00000138032	PPM1B	protein_coding	-0.45817	3.99852	7.81964	0.00516816	0.0317828
ENSG00000081148	IMPG2	protein_coding	-1.07296	-0.468653	7.81875	0.00517069	0.0317828
ENSG00000124532	MRS2	protein_coding	-0.335359	6.54805	7.81767	0.0051738	0.0317828
ENSG00000108960	MMD	protein_coding	-0.472789	3.80799	7.81744	0.00517444	0.0317828
ENSG00000101638	ST8SIA5	protein_coding	-0.605808	2.32076	7.81584	0.00517902	0.0317944
ENSG00000145088	EAF2	protein_coding	-0.353978	5.83701	7.80245	0.00521754	0.0320143
ENSG00000155090	KLF10	protein_coding	-0.407629	4.84359	7.79509	0.00523884	0.0321283
ENSG00000164284	GRPEL2	protein_coding	-0.391054	5.12512	7.79348	0.00524351	0.0321403
ENSG00000075213	SEMA3A	protein_coding	-0.794008	1.08254	7.78453	0.00526954	0.0322831
ENSG00000173137	ADCK5	protein_coding	-0.528884	3.09879	7.78346	0.00527267	0.0322856
ENSG00000132744	ACY3	protein_coding	0.487352	3.59247	7.77243	0.00530497	0.0324665
ENSG00000168427	KLHL30	protein_coding	-0.744533	1.17783	7.76281	0.00533331	0.0326231
ENSG00000167378	IRGQ	protein_coding	-0.332629	6.60996	7.76083	0.00533914	0.0326419
ENSG00000159399	HK2	protein_coding	-0.313	7.93844	7.75343	0.00536107	0.032759
ENSG00000128872	TMOD2	protein_coding	-0.449242	4.10798	7.7515	0.00536679	0.032765
ENSG00000196458	ZNF605	protein_coding	-0.418883	4.61052	7.75102	0.00536821	0.032765
ENSG00000175215	CTDSP2	protein_coding	0.307863	8.5517	7.75006	0.00537107	0.032765
ENSG00000064201	TSPAN32	protein_coding	0.442852	4.23951	7.74937	0.00537313	0.032765
ENSG00000113555	PCDH12	protein_coding	-0.510927	3.30651	7.74636	0.00538209	0.0328027
ENSG00000109046	WSB1	protein_coding	-0.312882	7.92551	7.74254	0.00539349	0.0328553
ENSG00000154328	NEIL2	protein_coding	-0.540356	2.93895	7.73505	0.00541591	0.0329717
ENSG00000104412	EMC2	protein_coding	-0.391074	5.09226	7.7343	0.00541817	0.0329717
ENSG00000130340	SNX9	protein_coding	-0.431188	4.38253	7.7329	0.00542237	0.0329803
ENSG00000079257	LXN	protein_coding	-0.428996	4.41649	7.73025	0.00543031	0.0330107
ENSG00000130475	FCHO1	protein_coding	-0.383696	5.22465	7.72938	0.00543295	0.0330107
ENSG00000090659	CD209	protein_coding	-0.407555	4.81898	7.72245	0.00545383	0.0331205
ENSG00000166401	SERPINB8	protein_coding	-0.31243	7.87207	7.69379	0.0055411	0.0336179
ENSG00000205730	ITPRIPL2	protein_coding	-0.420575	4.54861	7.69314	0.00554312	0.0336179
ENSG00000147586	MRPS28	protein_coding	-0.540658	2.95118	7.69277	0.00554425	0.0336179
ENSG00000139438	FAM222A	protein_coding	0.770221	1.12689	7.68711	0.00556166	0.0337057
ENSG00000171206	TRIM8	protein_coding	-0.338903	6.30047	7.68621	0.00556443	0.0337057
ENSG00000135045	C9orf40	protein_coding	-0.393926	5.03349	7.68417	0.00557072	0.0337265
ENSG00000064666	CNN2	protein_coding	0.317219	7.40117	7.68185	0.00557791	0.0337528
ENSG00000159640	ACE	protein_coding	0.926708	0.389607	7.67021	0.00561398	0.0339537
ENSG00000014257	ACPP	protein_coding	0.439104	4.26474	7.66786	0.00562132	0.0339807
ENSG00000154654	NCAM2	protein_coding	0.699566	1.61768	7.65232	0.00566992	0.034257
ENSG00000105649	RAB3A	protein_coding	-0.635831	1.97601	7.64806	0.00568334	0.0343206
ENSG00000161800	RACGAP1	protein_coding	0.316316	7.40642	7.64414	0.00569569	0.0343776
ENSG00000214050	FBXO16	protein_coding	-0.881319	0.335344	7.63425	0.00572701	0.034549
ENSG00000147471	PLPBP	protein_coding	-0.335211	6.39683	7.63112	0.00573698	0.0345915
ENSG00000158163	DZIP1L	protein_coding	-0.739785	1.20957	7.61757	0.00578023	0.0348345
ENSG00000171368	TPPP	protein_coding	0.925315	0.345012	7.61563	0.00578646	0.0348543
ENSG00000175216	CKAP5	protein_coding	0.310747	7.89075	7.60758	0.00581234	0.0349924
ENSG00000127954	STEAP4	protein_coding	-0.514629	3.20264	7.60649	0.00581585	0.0349957
ENSG00000135272	MDFIC	protein_coding	-0.415111	4.61168	7.59797	0.0058434	0.0351436
ENSG00000134072	CAMK1	protein_coding	0.409117	4.73741	7.59698	0.00584663	0.0351451
ENSG00000205758	CRYZL1	protein_coding	-0.405571	4.77804	7.59422	0.00585556	0.035181
ENSG00000125246	CLYBL	protein_coding	-0.556402	2.66684	7.57658	0.00591314	0.0355089
ENSG00000177732	SOX12	protein_coding	-0.369068	5.41072	7.57231	0.00592719	0.0355752
ENSG00000147852	VLDLR	protein_coding	-0.344602	5.99476	7.57071	0.00593245	0.0355887
ENSG00000137965	IFI44	protein_coding	-0.547715	2.79141	7.56862	0.00593933	0.0355971
ENSG00000156113	KCNMA1	protein_coding	-0.533108	2.95616	7.56845	0.00593988	0.0355971
ENSG00000132846	ZBED3	protein_coding	-0.865052	0.411151	7.56641	0.0059466	0.0356194
ENSG00000187486	KCNJ11	protein_coding	-0.728457	1.26845	7.56464	0.00595245	0.0356364
ENSG00000180818	HOXC10	protein_coding	0.718303	1.36343	7.5631	0.00595754	0.0356488
ENSG00000177565	TBL1XR1	protein_coding	-0.309577	7.91693	7.55989	0.00596817	0.0356944
ENSG00000165175	MID1IP1	protein_coding	-0.326388	6.69049	7.5557	0.00598205	0.0357413
ENSG00000143382	ADAMTSL4	protein_coding	-0.482982	3.56782	7.55566	0.0059822	0.0357413
ENSG00000144306	SCRN3	protein_coding	-0.42618	4.37919	7.55479	0.00598508	0.0357413
ENSG00000105568	PPP2R1A	protein_coding	0.308166	8.04852	7.55223	0.00599359	0.0357619
ENSG00000115540	MOB4	protein_coding	-0.431878	4.28917	7.55124	0.00599689	0.0357619
ENSG00000080200	CRYBG3	protein_coding	0.426202	4.40514	7.55102	0.0059976	0.0357619
ENSG00000135124	P2RX4	protein_coding	-0.365909	5.45756	7.54837	0.00600644	0.0357966
ENSG00000108691	CCL2	protein_coding	0.311541	7.72118	7.54722	0.00601028	0.0358014
ENSG00000166289	PLEKHF1	protein_coding	-0.880478	0.280426	7.54362	0.00602228	0.0358322
ENSG00000185420	SMYD3	protein_coding	-0.315058	7.31958	7.54295	0.00602452	0.0358322
ENSG00000132196	HSD17B7	protein_coding	-0.405256	4.75476	7.54295	0.00602454	0.0358322
ENSG00000181418	DDN	protein_coding	0.461952	3.86258	7.54014	0.00603394	0.0358701
ENSG00000125520	SLC2A4RG	protein_coding	0.372205	5.35388	7.53772	0.00604203	0.0359002
ENSG00000112237	CCNC	protein_coding	-0.326846	6.6463	7.53224	0.00606047	0.0359916
ENSG00000161847	RAVER1	protein_coding	0.435005	4.31537	7.53111	0.00606426	0.0359961
ENSG00000253276	CCDC71L	protein_coding	-0.472052	3.67172	7.52309	0.00609132	0.0361386
ENSG00000157456	CCNB2	protein_coding	0.328302	6.58295	7.52175	0.00609585	0.0361473
ENSG00000145107	TM4SF19	protein_coding	-1.02613	-0.320482	7.51777	0.00610934	0.0361738
ENSG00000134575	ACP2	protein_coding	0.398849	4.89049	7.51757	0.00610999	0.0361738
ENSG00000176597	B3GNT5	protein_coding	-0.352313	5.72496	7.51724	0.00611111	0.0361738
ENSG00000170004	CHD3	protein_coding	0.303243	8.54581	7.51682	0.00611255	0.0361738
[truncated: 9,831 more rows]

## Sheet: PPM1D.SODKO_over_WT.SODKO
GeneID	GeneSymbol	GeneBiotype	logFC	logCPM	LR	PValue	FDR
ENSG00000067798	NAV3	protein_coding	-3.03946	6.18514	850.951	4.51628e-187	5.34501e-183
ENSG00000175445	LPL	protein_coding	-4.36183	4.57953	821.768	9.98524e-181	5.90877e-177
ENSG00000164825	DEFB1	protein_coding	-2.8892	5.65294	651.039	1.3277e-143	5.23779e-140
ENSG00000109113	RAB34	protein_coding	-3.95253	4.30265	640.414	2.71555e-141	8.03465e-138
ENSG00000038427	VCAN	protein_coding	-3.84334	3.81278	497.49	3.34232e-110	7.91128e-107
ENSG00000143340	FAM163A	protein_coding	-5.03497	2.68652	367.862	5.46516e-82	1.078e-78
ENSG00000005381	MPO	protein_coding	-2.21483	4.89961	335.728	5.43538e-75	9.18968e-72
ENSG00000180592	SKIDA1	protein_coding	-5.92939	2.22289	328.238	2.32587e-73	3.44083e-70
ENSG00000109107	ALDOC	protein_coding	-2.19708	4.84486	315.561	1.3424e-70	1.76525e-67
ENSG00000103544	VPS35L	protein_coding	-3.1132	3.38165	307.768	6.6916e-69	7.9195e-66
ENSG00000130592	LSP1	protein_coding	1.6033	6.54583	302.138	1.1269e-67	1.21245e-64
ENSG00000111490	TBC1D30	protein_coding	-2.34963	4.41559	298.481	7.06008e-67	6.96301e-64
ENSG00000122378	PRXL2A	protein_coding	-4.09626	2.65925	296.295	2.11333e-66	1.92394e-63
ENSG00000176171	BNIP3	protein_coding	-1.8264	5.52179	276.473	4.40721e-62	3.72566e-59
ENSG00000124006	OBSL1	protein_coding	-4.47023	2.28821	272.514	3.21402e-61	2.53586e-58
ENSG00000196793	ZNF239	protein_coding	-5.37088	1.99164	271.183	6.26791e-61	4.6363e-58
ENSG00000104177	MYEF2	protein_coding	-2.70563	3.42053	256	1.27756e-57	8.89405e-55
ENSG00000145358	DDIT4L	protein_coding	-7.8372	1.5066	253.279	5.00648e-57	3.29176e-54
ENSG00000133048	CHI3L1	protein_coding	1.36796	8.06928	253.015	5.71615e-57	3.56056e-54
ENSG00000124762	CDKN1A	protein_coding	1.36267	8.9341	245.776	2.16488e-55	1.28107e-52
ENSG00000100985	MMP9	protein_coding	1.51079	6.10402	244.949	3.27842e-55	1.84762e-52
ENSG00000125538	IL1B	protein_coding	1.32509	7.85582	237.903	1.12694e-53	6.06245e-51
ENSG00000136010	ALDH1L2	protein_coding	-1.80476	4.87636	233.562	9.96846e-53	5.12942e-50
ENSG00000277443	MARCKS	protein_coding	-1.56808	5.70514	227.988	1.63724e-51	8.07363e-49
ENSG00000112290	WASF1	protein_coding	-2.398	3.55071	224.151	1.12458e-50	5.32378e-48
ENSG00000147255	IGSF1	protein_coding	-1.28508	7.20227	217.781	2.75665e-49	1.25481e-46
ENSG00000174307	PHLDA3	protein_coding	1.37665	6.24536	212.301	4.32403e-48	1.89537e-45
ENSG00000120708	TGFBI	protein_coding	1.26882	7.15928	212.156	4.65015e-48	1.96552e-45
ENSG00000170458	CD14	protein_coding	1.4695	5.83084	211.855	5.40957e-48	2.20767e-45
ENSG00000165731	RET	protein_coding	-1.89858	4.31534	209.879	1.45972e-47	5.75861e-45
ENSG00000108691	CCL2	protein_coding	1.24169	7.74996	209.537	1.73338e-47	6.61761e-45
ENSG00000133105	RXFP2	protein_coding	-1.82036	4.48722	208.588	2.79191e-47	1.03257e-44
ENSG00000179348	GATA2	protein_coding	-2.64905	2.9646	196.487	1.22004e-44	4.37549e-42
ENSG00000007171	NOS2	protein_coding	-3.35113	2.27777	196.42	1.26221e-44	4.39359e-42
ENSG00000055118	KCNH2	protein_coding	-3.85274	1.96798	195.904	1.63548e-44	5.53025e-42
ENSG00000099250	NRP1	protein_coding	1.26249	6.63441	195.383	2.12553e-44	6.98768e-42
ENSG00000159307	SCUBE1	protein_coding	-3.83956	1.92249	192.287	1.00727e-43	3.22191e-41
ENSG00000205213	LGR4	protein_coding	-1.43119	5.65165	188.616	6.3738e-43	1.9851e-40
ENSG00000133863	TEX15	protein_coding	-9.04742	0.834434	181.989	1.78333e-41	5.41172e-39
ENSG00000132514	CLEC10A	protein_coding	1.61164	4.70411	180.886	3.10488e-41	9.18657e-39
ENSG00000198715	GLMP	protein_coding	-2.85481	2.55175	179.366	6.66504e-41	1.92392e-38
ENSG00000170456	DENND5B	protein_coding	-7.21551	0.899207	177.46	1.73747e-40	4.89595e-38
ENSG00000258227	CLEC5A	protein_coding	-1.13455	8.36564	176.476	2.85101e-40	7.84691e-38
ENSG00000171051	FPR1	protein_coding	2.11588	3.45678	176.414	2.94035e-40	7.90886e-38
ENSG00000160593	JAML	protein_coding	1.26156	6.12298	175.181	5.46616e-40	1.4376e-37
ENSG00000276600	RAB7B	protein_coding	1.23754	6.2462	173.648	1.18176e-39	3.04046e-37
ENSG00000099194	SCD	protein_coding	-1.1409	9.65698	169.656	8.79778e-39	2.21536e-36
ENSG00000179083	FAM133A	protein_coding	3.73702	1.62146	168.133	1.89176e-38	4.66437e-36
ENSG00000113645	WWC1	protein_coding	-4.59413	1.25913	164.911	9.56408e-38	2.31002e-35
ENSG00000214787	MS4A4E	protein_coding	-1.6777	4.22205	162.154	3.82791e-37	9.06066e-35
ENSG00000196611	MMP1	protein_coding	1.75301	4.0205	161.884	4.38625e-37	1.01787e-34
ENSG00000116157	GPX7	protein_coding	-2.12429	3.2532	158.873	1.9943e-36	4.53896e-34
ENSG00000167555	ZNF528	protein_coding	-4.635	1.15054	158.351	2.59426e-36	5.79302e-34
ENSG00000087245	MMP2	protein_coding	1.61113	4.31054	157.517	3.94662e-36	8.64968e-34
ENSG00000130513	GDF15	protein_coding	2.05489	3.3308	157.211	4.60394e-36	9.90683e-34
ENSG00000179163	FUCA1	protein_coding	1.17201	6.10649	151.701	7.36422e-35	1.55635e-32
ENSG00000158869	FCER1G	protein_coding	1.04808	7.97624	150.976	1.06089e-34	2.20274e-32
ENSG00000181577	C6orf223	protein_coding	-1.1133	6.57143	149.774	1.94233e-34	3.96336e-32
ENSG00000134202	GSTM3	protein_coding	-5.14991	0.866121	146.633	9.43844e-34	1.89329e-31
ENSG00000158517	NCF1	protein_coding	1.05729	6.89862	144.566	2.67144e-33	5.26941e-31
ENSG00000135218	CD36	protein_coding	1.14833	6.05111	144.051	3.46229e-33	6.7174e-31
ENSG00000251493	FOXD1	protein_coding	-4.58658	0.950494	140.695	1.87628e-32	3.58158e-30
ENSG00000073756	PTGS2	protein_coding	1.41336	4.63415	139.981	2.68816e-32	5.04991e-30
ENSG00000173546	CSPG4	protein_coding	1.19523	5.751	138.997	4.4122e-32	8.15912e-30
ENSG00000111199	TRPV4	protein_coding	1.93767	3.28154	138.375	6.03343e-32	1.09855e-29
ENSG00000100292	HMOX1	protein_coding	1.99966	3.13961	137.264	1.05559e-31	1.89286e-29
ENSG00000128268	MGAT3	protein_coding	1.35406	4.76861	133.582	6.74248e-31	1.191e-28
ENSG00000138772	ANXA3	protein_coding	-6.72838	0.40484	132.888	9.56643e-31	1.66498e-28
ENSG00000198346	ZNF813	protein_coding	-3.83539	1.17536	132.135	1.39791e-30	2.39772e-28
ENSG00000136235	GPNMB	protein_coding	1.09919	6.03227	131.414	2.01032e-30	3.39888e-28
ENSG00000149516	MS4A3	protein_coding	-0.998818	9.74972	130.622	2.99507e-30	4.99248e-28
ENSG00000181458	TMEM45A	protein_coding	-1.77838	3.50729	130.339	3.45436e-30	5.67811e-28
ENSG00000106484	MEST	protein_coding	-2.77348	1.96729	129.211	6.09927e-30	9.88833e-28
ENSG00000254415	SIGLEC14	protein_coding	1.19487	5.53965	128.234	9.97639e-30	1.59555e-27
ENSG00000117091	CD48	protein_coding	1.10528	5.89187	126.408	2.503e-29	3.94974e-27
ENSG00000167996	FTH1	protein_coding	1.05276	6.24204	126.359	2.56658e-29	3.99677e-27
ENSG00000187068	C3orf70	protein_coding	-4.74944	0.680058	125.501	3.95308e-29	6.00808e-27
ENSG00000175130	MARCKSL1	protein_coding	0.97012	7.12087	125.498	3.9597e-29	6.00808e-27
ENSG00000171509	RXFP1	protein_coding	-1.21702	5.30125	125.208	4.58219e-29	6.86459e-27
ENSG00000136830	NIBAN2	protein_coding	1.18242	5.50528	124.53	6.45022e-29	9.5423e-27
ENSG00000010818	HIVEP2	protein_coding	-3.24116	1.43577	124.336	7.11316e-29	1.03931e-26
ENSG00000198561	CTNND1	protein_coding	1.05309	6.09052	122.802	1.54085e-28	2.2239e-26
ENSG00000087116	ADAMTS2	protein_coding	-2.87554	1.77994	122.436	1.85286e-28	2.61935e-26
ENSG00000102265	TIMP1	protein_coding	0.949395	7.31291	122.398	1.88838e-28	2.61935e-26
ENSG00000126709	IFI6	protein_coding	1.02261	6.33564	122.388	1.89876e-28	2.61935e-26
ENSG00000112972	HMGCS1	protein_coding	-0.950751	7.2901	122.383	1.90337e-28	2.61935e-26
ENSG00000184445	KNTC1	protein_coding	-0.965161	6.94938	122.089	2.20672e-28	3.00189e-26
ENSG00000175489	LRRC25	protein_coding	1.22649	5.1206	121.36	3.18716e-28	4.28637e-26
ENSG00000125730	C3	protein_coding	1.15412	5.57356	121.312	3.26543e-28	4.34229e-26
ENSG00000134824	FADS2	protein_coding	-0.945644	8.90721	120.748	4.3397e-28	5.7067e-26
ENSG00000104765	BNIP3L	protein_coding	-1.0182	6.3134	120.133	5.91664e-28	7.69488e-26
ENSG00000116701	NCF2	protein_coding	0.927252	7.90861	118.789	1.16499e-27	1.49866e-25
ENSG00000104219	ZDHHC2	protein_coding	-1.02908	6.1469	118.709	1.2129e-27	1.54352e-25
ENSG00000152256	PDK1	protein_coding	-1.04883	5.99009	118.236	1.53924e-27	1.93797e-25
ENSG00000134531	EMP1	protein_coding	1.2789	4.6954	117.545	2.18064e-27	2.71662e-25
ENSG00000115590	IL1R2	protein_coding	2.66713	1.83599	116.399	3.88666e-27	4.79153e-25
ENSG00000114013	CD86	protein_coding	1.1348	5.5323	115.901	4.99717e-27	6.09707e-25
ENSG00000149485	FADS1	protein_coding	-0.914203	8.31949	115.622	5.75153e-27	6.94585e-25
ENSG00000131355	ADGRE3	protein_coding	1.66843	3.44137	115.323	6.6879e-27	7.99508e-25
ENSG00000196878	LAMB3	protein_coding	1.41181	4.16634	115.167	7.23501e-27	8.56263e-25
ENSG00000167680	SEMA6B	protein_coding	1.58433	3.64309	114.179	1.19053e-26	1.39504e-24
ENSG00000156299	TIAM1	protein_coding	2.27803	2.27369	113.654	1.55121e-26	1.79986e-24
ENSG00000120875	DUSP4	protein_coding	1.43864	4.03292	113.508	1.67e-26	1.91888e-24
ENSG00000181381	DDX60L	protein_coding	-0.919122	7.15461	113.315	1.84055e-26	2.09451e-24
ENSG00000155465	SLC7A7	protein_coding	1.44586	3.99832	112.964	2.1977e-26	2.47713e-24
ENSG00000148400	NOTCH1	protein_coding	0.94133	6.75714	112.715	2.49161e-26	2.78191e-24
ENSG00000111817	DSE	protein_coding	1.46574	3.91369	112.137	3.33389e-26	3.68753e-24
ENSG00000166825	ANPEP	protein_coding	1.15124	5.26956	111.593	4.38797e-26	4.80849e-24
ENSG00000075618	FSCN1	protein_coding	-1.13445	5.39804	111.323	5.0283e-26	5.45962e-24
ENSG00000163808	KIF15	protein_coding	-1.11111	5.4896	109.983	9.8846e-26	1.06349e-23
ENSG00000196867	ZFP28	protein_coding	-8.11239	-0.0320072	109.796	1.0862e-25	1.15812e-23
ENSG00000177508	IRX3	protein_coding	-2.35558	2.24087	109.591	1.20461e-25	1.27291e-23
ENSG00000166927	MS4A7	protein_coding	-0.962827	6.34561	109.063	1.57198e-25	1.6464e-23
ENSG00000167972	ABCA3	protein_coding	-2.98345	1.3941	109.011	1.61353e-25	1.6751e-23
ENSG00000111674	ENO2	protein_coding	-1.47909	3.93007	108.828	1.7703e-25	1.82187e-23
ENSG00000263961	RHEX	protein_coding	-2.11285	2.49996	108.791	1.80298e-25	1.8395e-23
ENSG00000144354	CDCA7	protein_coding	-1.12331	5.33561	108.293	2.31793e-25	2.34468e-23
ENSG00000145632	PLK2	protein_coding	1.21617	4.73712	108.042	2.63208e-25	2.63989e-23
ENSG00000056998	GYG2	protein_coding	-3.45561	1.01122	107.968	2.73185e-25	2.71693e-23
ENSG00000118515	SGK1	protein_coding	1.33901	4.23749	107.918	2.80112e-25	2.7626e-23
ENSG00000119630	PGF	protein_coding	1.47624	3.79911	107.289	3.84814e-25	3.76386e-23
ENSG00000026751	SLAMF7	protein_coding	1.27852	4.41081	106.281	6.39715e-25	6.20576e-23
ENSG00000130487	KLHDC7B	protein_coding	-3.89056	0.716692	106.041	7.22106e-25	6.94807e-23
ENSG00000151632	AKR1C2	protein_coding	-2.56658	1.80895	105.844	7.97606e-25	7.61264e-23
ENSG00000163221	S100A12	protein_coding	1.11447	5.30328	105.776	8.2542e-25	7.81508e-23
ENSG00000113739	STC2	protein_coding	-3.01252	1.30136	105.54	9.30149e-25	8.73676e-23
ENSG00000172667	ZMAT3	protein_coding	0.921378	6.59369	105.329	1.03463e-24	9.64158e-23
ENSG00000157227	MMP14	protein_coding	0.890055	9.38225	105.174	1.11866e-24	1.02878e-22
ENSG00000203710	CR1	protein_coding	-0.903294	6.88196	105.169	1.12136e-24	1.02878e-22
ENSG00000075275	CELSR1	protein_coding	-2.63511	1.70921	105.025	1.20584e-24	1.09778e-22
ENSG00000132199	ENOSF1	protein_coding	-1.37497	4.06176	104.766	1.37412e-24	1.24143e-22
ENSG00000123689	G0S2	protein_coding	1.82553	2.91866	104.648	1.45862e-24	1.30778e-22
ENSG00000015413	DPEP1	protein_coding	-8.11609	-0.116495	104.597	1.49687e-24	1.33199e-22
ENSG00000197122	SRC	protein_coding	1.0932	5.40487	104.507	1.56662e-24	1.38365e-22
ENSG00000111181	SLC6A12	protein_coding	1.49637	3.68159	104.458	1.60572e-24	1.40768e-22
ENSG00000030582	GRN	protein_coding	0.882457	9.17211	104.211	1.81847e-24	1.58247e-22
ENSG00000125735	TNFSF14	protein_coding	1.2953	4.30278	103.87	2.16049e-24	1.86638e-22
ENSG00000171160	MORN4	protein_coding	-4.03601	0.592864	103.662	2.39934e-24	2.05769e-22
ENSG00000161944	ASGR2	protein_coding	1.2254	4.5587	102.991	3.36726e-24	2.86702e-22
ENSG00000241839	PLEKHO2	protein_coding	0.951121	6.18872	102.875	3.57028e-24	3.01468e-22
ENSG00000114948	ADAM23	protein_coding	-2.40471	1.94184	102.863	3.59163e-24	3.01468e-22
ENSG00000134247	PTGFRN	protein_coding	0.962651	6.06079	102.432	4.46374e-24	3.72031e-22
ENSG00000104419	NDRG1	protein_coding	-0.863382	7.8767	102.383	4.57587e-24	3.78709e-22
ENSG00000116985	BMP8B	protein_coding	-0.902808	6.66332	102.018	5.50108e-24	4.5212e-22
ENSG00000100979	PLTP	protein_coding	-1.33175	4.15233	101.961	5.66184e-24	4.62123e-22
ENSG00000126091	ST3GAL3	protein_coding	-1.26676	4.35626	101.361	7.66415e-24	6.21269e-22
ENSG00000180828	BHLHE22	protein_coding	-4.00606	0.550742	101.338	7.75688e-24	6.24508e-22
ENSG00000182718	ANXA2	protein_coding	0.913566	6.43367	100.368	1.26539e-23	1.01189e-21
ENSG00000159674	SPON2	protein_coding	-1.12386	5.04262	99.9281	1.58034e-23	1.25525e-21
ENSG00000159388	BTG2	protein_coding	0.873997	6.88875	99.5968	1.86804e-23	1.47388e-21
ENSG00000160789	LMNA	protein_coding	0.870032	6.9318	99.2979	2.17242e-23	1.69069e-21
ENSG00000147465	STAR	protein_coding	-1.04419	5.56454	99.2938	2.17691e-23	1.69069e-21
ENSG00000174776	WDR49	protein_coding	-1.43516	3.74912	99.2858	2.18568e-23	1.69069e-21
ENSG00000135709	KIAA0513	protein_coding	1.88657	2.69299	99.0697	2.43768e-23	1.87337e-21
ENSG00000139572	GPR84	protein_coding	0.893476	6.60049	98.9439	2.59754e-23	1.98335e-21
ENSG00000132965	ALOX5AP	protein_coding	0.854284	9.0171	98.4574	3.32096e-23	2.51946e-21
ENSG00000177606	JUN	protein_coding	1.24473	4.33855	97.7177	4.82495e-23	3.63715e-21
ENSG00000133317	LGALS12	protein_coding	1.1184	4.95262	97.2993	5.96019e-23	4.46448e-21
ENSG00000113810	SMC4	protein_coding	-0.835205	8.47084	96.3995	9.38886e-23	6.95051e-21
ENSG00000092621	PHGDH	protein_coding	-0.848659	7.12519	96.3979	9.39655e-23	6.95051e-21
ENSG00000151651	ADAM8	protein_coding	0.843797	7.24487	96.3177	9.78517e-23	7.19301e-21
ENSG00000138778	CENPE	protein_coding	-0.895138	6.39143	95.5379	1.45084e-22	1.05992e-20
ENSG00000161996	WDR90	protein_coding	-0.907606	6.2763	95.3584	1.5886e-22	1.15344e-20
ENSG00000169508	GPR183	protein_coding	1.30185	4.06285	95.3029	1.63371e-22	1.17896e-20
ENSG00000066279	ASPM	protein_coding	-0.828933	7.61897	95.0664	1.84101e-22	1.32051e-20
ENSG00000143546	S100A8	protein_coding	0.834198	8.74003	95.0457	1.86038e-22	1.32636e-20
ENSG00000159339	PADI4	protein_coding	0.92749	6.01465	93.9727	3.19912e-22	2.26716e-20
ENSG00000169896	ITGAM	protein_coding	0.965101	5.79403	93.3515	4.37842e-22	3.08444e-20
ENSG00000004777	ARHGAP33	protein_coding	-1.08748	5.00529	92.9881	5.26094e-22	3.68421e-20
ENSG00000181019	NQO1	protein_coding	1.03044	5.38614	92.8915	5.52422e-22	3.84583e-20
ENSG00000160752	FDPS	protein_coding	-0.82065	7.61387	92.8769	5.56491e-22	3.8515e-20
ENSG00000112742	TTK	protein_coding	-0.855028	6.72167	92.7925	5.80741e-22	3.99597e-20
ENSG00000109762	SNX25	protein_coding	-3.03452	1.03886	92.7788	5.84783e-22	4.00052e-20
ENSG00000155966	AFF2	protein_coding	-1.21498	4.323	92.4213	7.00561e-22	4.76502e-20
ENSG00000168758	SEMA4C	protein_coding	0.88419	6.33305	92.0242	8.56227e-22	5.79054e-20
ENSG00000171502	COL24A1	protein_coding	-1.13221	4.67877	91.9509	8.88538e-22	5.94489e-20
ENSG00000135046	ANXA1	protein_coding	0.830665	7.04728	91.9497	8.89097e-22	5.94489e-20
ENSG00000135679	MDM2	protein_coding	0.813222	8.49605	91.451	1.14388e-21	7.60555e-20
ENSG00000169136	ATF5	protein_coding	-0.83971	6.84181	90.8038	1.58647e-21	1.04893e-19
ENSG00000156802	ATAD2	protein_coding	-0.810715	7.43609	90.715	1.6593e-21	1.09099e-19
ENSG00000072571	HMMR	protein_coding	-0.883324	6.22419	89.7394	2.71689e-21	1.77649e-19
ENSG00000138028	CGREF1	protein_coding	-1.0387	5.21288	89.6385	2.859e-21	1.85914e-19
ENSG00000139626	ITGB7	protein_coding	0.859318	6.41918	88.5959	4.8429e-21	3.13201e-19
ENSG00000142669	SH3BGRL3	protein_coding	0.809398	8.99584	88.5774	4.88837e-21	3.13971e-19
ENSG00000143217	NECTIN4	protein_coding	1.34837	3.74181	88.5695	4.90787e-21	3.13971e-19
ENSG00000060718	COL11A1	protein_coding	1.74054	2.81418	88.0572	6.35902e-21	4.04618e-19
ENSG00000117984	CTSD	protein_coding	0.859533	6.38066	87.7604	7.38832e-21	4.67598e-19
ENSG00000197343	ZNF655	protein_coding	-0.987665	5.4887	87.5632	8.16306e-21	5.13882e-19
ENSG00000105246	EBI3	protein_coding	1.25532	4.03116	87.5309	8.29727e-21	5.19567e-19
ENSG00000161513	FDXR	protein_coding	1.05659	4.97068	87.3867	8.92491e-21	5.55928e-19
ENSG00000204272	NBDY	protein_coding	1.47293	3.3476	87.3451	9.1147e-21	5.64777e-19
ENSG00000159335	PTMS	protein_coding	1.04273	5.06657	87.092	1.0359e-20	6.38534e-19
ENSG00000155657	TTN	protein_coding	-1.08142	4.76006	86.4744	1.4156e-20	8.68061e-19
ENSG00000187134	AKR1C1	protein_coding	-2.84481	1.05213	86.2518	1.58425e-20	9.66474e-19
ENSG00000188282	RUFY4	protein_coding	-1.02861	5.1416	85.9376	1.85708e-20	1.12711e-18
ENSG00000198324	PHETA1	protein_coding	1.34481	3.68609	85.861	1.93037e-20	1.16561e-18
ENSG00000148926	ADM	protein_coding	1.73381	2.70478	85.6718	2.12424e-20	1.27616e-18
ENSG00000133739	LRRCC1	protein_coding	-1.0224	5.12374	85.4743	2.3473e-20	1.40305e-18
ENSG00000112195	TREML2	protein_coding	0.89654	5.92411	84.9842	3.00762e-20	1.7887e-18
ENSG00000167378	IRGQ	protein_coding	0.824082	6.61237	84.7645	3.36098e-20	1.98886e-18
ENSG00000161011	SQSTM1	protein_coding	0.800054	6.95398	84.4809	3.87942e-20	2.28423e-18
ENSG00000140379	BCL2A1	protein_coding	1.02682	5.03241	84.1961	4.48064e-20	2.62517e-18
ENSG00000123384	LRP1	protein_coding	0.808421	6.75171	83.4931	6.39404e-20	3.72775e-18
ENSG00000175455	CCDC14	protein_coding	-0.787926	7.08413	83.107	7.77305e-20	4.50951e-18
ENSG00000104870	FCGRT	protein_coding	1.05976	4.76167	83.0463	8.01532e-20	4.62738e-18
ENSG00000196371	FUT4	protein_coding	-0.769022	7.78925	82.1246	1.27773e-19	7.34076e-18
ENSG00000267508	ZNF285	protein_coding	-7.64112	-0.488322	81.8881	1.44012e-19	8.23375e-18
ENSG00000166432	ZMAT1	protein_coding	-1.45716	3.25549	81.3597	1.88156e-19	1.06935e-17
ENSG00000246705	H2AFJ	protein_coding	-1.27181	3.82765	81.3525	1.88841e-19	1.06935e-17
ENSG00000007237	GAS7	protein_coding	0.807596	6.59526	81.1531	2.08893e-19	1.17726e-17
ENSG00000159784	FAM131B	protein_coding	-2.21553	1.73668	80.6269	2.72629e-19	1.52918e-17
ENSG00000122025	FLT3	protein_coding	-0.762367	7.53022	80.3863	3.07921e-19	1.71898e-17
ENSG00000196684	HSH2D	protein_coding	-0.76119	7.53233	80.0854	3.58572e-19	1.99235e-17
ENSG00000234465	PINLYP	protein_coding	1.01768	4.9209	79.8925	3.95351e-19	2.18644e-17
ENSG00000088882	CPXM1	protein_coding	-0.962177	5.50968	79.8448	4.05011e-19	2.22945e-17
ENSG00000219607	PPP1R3G	protein_coding	-1.35471	3.52459	79.6997	4.35867e-19	2.38819e-17
ENSG00000181026	AEN	protein_coding	0.792082	6.6952	79.424	5.01128e-19	2.73311e-17
ENSG00000155366	RHOC	protein_coding	1.0417	4.71229	79.3079	5.31463e-19	2.88526e-17
ENSG00000172716	SLFN11	protein_coding	-0.76869	7.10501	79.2874	5.37009e-19	2.90205e-17
ENSG00000166068	SPRED1	protein_coding	-3.22787	0.565252	79.2648	5.43187e-19	2.9221e-17
ENSG00000134827	TCN1	protein_coding	-1.34766	3.53575	79.2073	5.59221e-19	2.99474e-17
ENSG00000166582	CENPV	protein_coding	-1.0874	4.46875	79.1964	5.62339e-19	2.99787e-17
ENSG00000013364	MVP	protein_coding	0.835888	6.15581	79.142	5.78025e-19	3.06768e-17
ENSG00000167850	CD300C	protein_coding	1.0737	4.52158	79.1063	5.88573e-19	3.10972e-17
ENSG00000085514	PILRA	protein_coding	1.04528	4.66983	78.8351	6.75179e-19	3.55144e-17
ENSG00000138678	GPAT3	protein_coding	1.12401	4.27891	78.7833	6.93101e-19	3.62958e-17
ENSG00000186469	GNG2	protein_coding	1.0913	4.41996	78.7731	6.96691e-19	3.63231e-17
ENSG00000114805	PLCH1	protein_coding	2.73919	0.882562	78.5886	7.64876e-19	3.97031e-17
ENSG00000171049	FPR2	protein_coding	1.18959	3.997	78.1111	9.7406e-19	5.03406e-17
ENSG00000104549	SQLE	protein_coding	-0.758034	7.22625	78.0321	1.01378e-18	5.21658e-17
ENSG00000188822	CNR2	protein_coding	1.70955	2.54644	77.8044	1.13768e-18	5.82877e-17
ENSG00000135404	CD63	protein_coding	0.756041	8.92497	77.6941	1.20302e-18	6.13696e-17
ENSG00000104918	RETN	protein_coding	-1.99814	2.01468	77.6801	1.21155e-18	6.15395e-17
ENSG00000214279	SCART1	protein_coding	0.92606	5.53258	77.6077	1.25676e-18	6.35632e-17
ENSG00000163918	RFC4	protein_coding	-0.766963	6.92407	77.3565	1.42726e-18	7.18792e-17
ENSG00000197324	LRP10	protein_coding	0.781639	6.67448	77.1135	1.61407e-18	8.09428e-17
ENSG00000186074	CD300LF	protein_coding	0.790762	6.53437	77.0208	1.69169e-18	8.44776e-17
ENSG00000067064	IDI1	protein_coding	-0.753526	7.18899	76.8665	1.82915e-18	9.09577e-17
ENSG00000011422	PLAUR	protein_coding	0.743214	7.66035	76.6017	2.09158e-18	1.03447e-16
ENSG00000148143	ZNF462	protein_coding	1.3979	3.27186	76.5959	2.09778e-18	1.03447e-16
ENSG00000146281	PM20D2	protein_coding	-0.759093	6.98421	76.5157	2.18469e-18	1.07286e-16
ENSG00000118412	CASP8AP2	protein_coding	-0.763245	6.9081	76.4661	2.24024e-18	1.09559e-16
ENSG00000042493	CAPG	protein_coding	0.746906	8.77068	76.3348	2.39421e-18	1.16607e-16
ENSG00000167210	LOXHD1	protein_coding	-0.925301	5.45875	76.3003	2.43651e-18	1.18181e-16
ENSG00000161642	ZNF385A	protein_coding	0.745583	7.3374	76.2737	2.46945e-18	1.1929e-16
ENSG00000120437	ACAT2	protein_coding	-0.793875	6.43802	76.0098	2.82264e-18	1.35797e-16
ENSG00000110077	MS4A6A	protein_coding	-0.816091	6.18278	75.9967	2.84135e-18	1.36143e-16
ENSG00000131669	NINJ1	protein_coding	0.930912	5.36981	75.7109	3.28391e-18	1.56714e-16
ENSG00000087088	BAX	protein_coding	0.737694	7.8705	75.6666	3.35849e-18	1.59629e-16
ENSG00000160298	C21orf58	protein_coding	-0.993693	4.87056	75.5219	3.61384e-18	1.71079e-16
ENSG00000090104	RGS1	protein_coding	0.958506	5.1064	75.2572	4.13213e-18	1.94836e-16
ENSG00000026950	BTN3A1	protein_coding	-0.900512	5.58978	75.1457	4.37228e-18	2.05341e-16
ENSG00000187091	PLCD1	protein_coding	1.43049	3.14902	74.8309	5.12818e-18	2.39889e-16
ENSG00000106003	LFNG	protein_coding	1.18727	3.90332	74.6864	5.5174e-18	2.57081e-16
ENSG00000114204	SERPINI2	protein_coding	-1.38256	3.27416	74.65	5.62024e-18	2.60845e-16
ENSG00000124570	SERPINB6	protein_coding	-0.808302	6.19403	74.5719	5.84697e-18	2.70308e-16
ENSG00000078237	TIGAR	protein_coding	1.44454	3.07244	74.4848	6.11057e-18	2.81395e-16
ENSG00000182985	CADM1	protein_coding	0.853576	5.8221	74.4456	6.23318e-18	2.85929e-16
ENSG00000127586	CHTF18	protein_coding	-0.917559	5.4419	74.364	6.49632e-18	2.96849e-16
ENSG00000188994	ZNF292	protein_coding	-0.765386	6.69228	74.1683	7.17339e-18	3.26527e-16
ENSG00000122483	CCDC18	protein_coding	-0.928279	5.28027	73.7808	8.72912e-18	3.95821e-16
ENSG00000187678	SPRY4	protein_coding	1.02983	4.54062	73.7118	9.03953e-18	4.08332e-16
ENSG00000110446	SLC15A3	protein_coding	1.05874	4.40852	73.5178	9.97336e-18	4.48801e-16
ENSG00000163162	RNF149	protein_coding	0.808688	6.08301	73.2497	1.1424e-17	5.12133e-16
ENSG00000163220	S100A9	protein_coding	0.742628	9.61789	73.108	1.22744e-17	5.48177e-16
ENSG00000090339	ICAM1	protein_coding	1.28408	3.51983	72.9835	1.30735e-17	5.81673e-16
ENSG00000130822	PNCK	protein_coding	-4.0729	-0.044653	72.9076	1.35863e-17	6.02226e-16
ENSG00000118785	SPP1	protein_coding	0.901421	5.53981	72.8672	1.38676e-17	6.12399e-16
ENSG00000172403	SYNPO2	protein_coding	-0.928681	5.23031	72.7861	1.44494e-17	6.35719e-16
ENSG00000011600	TYROBP	protein_coding	0.718179	8.22775	71.8367	2.33761e-17	1.02465e-15
ENSG00000116016	EPAS1	protein_coding	1.77549	2.20027	71.6896	2.51853e-17	1.09988e-15
ENSG00000059804	SLC2A3	protein_coding	0.73308	6.9772	71.2747	3.1079e-17	1.35228e-15
ENSG00000095970	TREM2	protein_coding	1.65374	2.48542	71.1162	3.368e-17	1.46008e-15
ENSG00000117115	PADI2	protein_coding	0.798411	6.07543	71.0816	3.42744e-17	1.48043e-15
ENSG00000197956	S100A6	protein_coding	0.715541	7.55063	71.0059	3.56152e-17	1.53275e-15
ENSG00000196584	XRCC2	protein_coding	-0.936219	5.07205	70.9624	3.64104e-17	1.5613e-15
ENSG00000197969	VPS13A	protein_coding	-0.803862	5.99651	70.6509	4.26369e-17	1.82169e-15
ENSG00000104611	SH2D4A	protein_coding	-1.31228	3.37158	70.6412	4.28483e-17	1.82414e-15
ENSG00000088826	SMOX	protein_coding	1.07113	4.25525	70.5942	4.38802e-17	1.86137e-15
ENSG00000196730	DAPK1	protein_coding	0.816682	5.91244	70.5492	4.48923e-17	1.8975e-15
ENSG00000136982	DSCC1	protein_coding	-0.931678	5.06664	70.2376	5.25755e-17	2.21435e-15
ENSG00000142731	PLK4	protein_coding	-0.793947	6.06032	70.1208	5.57823e-17	2.34108e-15
ENSG00000139289	PHLDA1	protein_coding	1.33207	3.25613	69.9898	5.96132e-17	2.49301e-15
ENSG00000139629	GALNT6	protein_coding	0.81527	5.90251	69.9568	6.06189e-17	2.52614e-15
ENSG00000011426	ANLN	protein_coding	-0.738614	6.75332	69.9459	6.09538e-17	2.53119e-15
ENSG00000188211	NCR3LG1	protein_coding	-0.773917	6.24958	69.5645	7.39565e-17	3.0604e-15
ENSG00000169710	FASN	protein_coding	-0.707181	8.43559	69.4649	7.77853e-17	3.20763e-15
ENSG00000169385	RNASE2	protein_coding	-0.705744	8.0212	69.3779	8.12926e-17	3.34062e-15
ENSG00000168461	RAB31	protein_coding	0.723378	6.95062	69.3502	8.24444e-17	3.37622e-15
ENSG00000103037	SETD6	protein_coding	-1.04103	4.3283	68.8955	1.03822e-16	4.237e-15
ENSG00000174099	MSRB3	protein_coding	-0.780461	6.13322	68.8607	1.05667e-16	4.29738e-15
ENSG00000101194	SLC17A9	protein_coding	-0.775805	6.19572	68.854	1.06028e-16	4.29738e-15
ENSG00000110455	ACCS	protein_coding	-1.04425	4.29893	68.2992	1.40478e-16	5.67426e-15
ENSG00000156970	BUB1B	protein_coding	-0.726421	6.80653	68.2453	1.44374e-16	5.8118e-15
ENSG00000164713	BRI3	protein_coding	0.818307	5.81546	68.1764	1.49501e-16	5.99776e-15
ENSG00000118513	MYB	protein_coding	-0.70416	8.70754	68.1433	1.52035e-16	6.07885e-15
ENSG00000146072	TNFRSF21	protein_coding	0.973285	4.62371	68.0348	1.60637e-16	6.40113e-15
ENSG00000164938	TP53INP1	protein_coding	0.900424	5.18009	68.016	1.62171e-16	6.44057e-15
ENSG00000122966	CIT	protein_coding	-0.808901	5.87352	67.9936	1.64024e-16	6.49239e-15
ENSG00000164733	CTSB	protein_coding	0.701096	7.40911	67.9858	1.64674e-16	6.49638e-15
ENSG00000145545	SRD5A1	protein_coding	1.02201	4.36381	67.9027	1.71766e-16	6.75365e-15
ENSG00000186350	RXRA	protein_coding	0.867061	5.48194	67.8478	1.76614e-16	6.92127e-15
ENSG00000178773	CPNE7	protein_coding	-2.53463	0.92034	67.6717	1.93116e-16	7.543e-15
ENSG00000172893	DHCR7	protein_coding	-0.734455	6.62224	67.3972	2.21959e-16	8.64106e-15
ENSG00000166199	ALKBH3	protein_coding	-1.33728	3.20062	67.3828	2.23596e-16	8.67626e-15
ENSG00000026025	VIM	protein_coding	0.703298	8.91843	67.3741	2.24578e-16	8.6859e-15
ENSG00000110031	LPXN	protein_coding	0.701742	8.86644	67.2342	2.41096e-16	9.29437e-15
ENSG00000110324	IL10RA	protein_coding	0.862029	5.48085	67.0289	2.67555e-16	1.02809e-14
ENSG00000166928	MS4A14	protein_coding	-1.00553	4.42495	66.9283	2.81562e-16	1.07841e-14
ENSG00000123342	MMP19	protein_coding	1.04546	4.23726	66.811	2.9883e-16	1.14086e-14
ENSG00000119714	GPR68	protein_coding	1.24103	3.46798	66.8019	3.00203e-16	1.14241e-14
ENSG00000114346	ECT2	protein_coding	-0.753142	6.30419	66.7768	3.04048e-16	1.15334e-14
ENSG00000137496	IL18BP	protein_coding	0.893718	5.1823	66.6943	3.17049e-16	1.19881e-14
ENSG00000124508	BTN2A2	protein_coding	-0.961608	4.66134	66.6268	3.2809e-16	1.23661e-14
ENSG00000135048	CEMIP2	protein_coding	1.08112	4.04942	66.5473	3.41594e-16	1.28342e-14
ENSG00000249992	TMEM158	protein_coding	1.16817	3.72615	66.5097	3.48168e-16	1.30041e-14
ENSG00000115129	TP53I3	protein_coding	1.20779	3.5798	66.5089	3.48314e-16	1.30041e-14
ENSG00000145569	OTULINL	protein_coding	-0.910034	5.03063	66.4461	3.59584e-16	1.33826e-14
ENSG00000169429	CXCL8	protein_coding	0.690497	7.68501	66.3652	3.74652e-16	1.38997e-14
ENSG00000163947	ARHGEF3	protein_coding	0.713307	6.84914	66.3539	3.76818e-16	1.39364e-14
ENSG00000136014	USP44	protein_coding	2.13503	1.33636	66.3433	3.78844e-16	1.39676e-14
ENSG00000228594	FNDC10	protein_coding	-3.57094	-0.000684538	66.2022	4.06964e-16	1.49578e-14
ENSG00000138182	KIF20B	protein_coding	-0.743027	6.37142	65.9557	4.6118e-16	1.6898e-14
ENSG00000137693	YAP1	protein_coding	1.72311	2.12784	65.9424	4.64287e-16	1.69594e-14
ENSG00000117480	FAAH	protein_coding	-0.955108	4.66152	65.6419	5.40775e-16	1.96925e-14
ENSG00000138658	ZGRF1	protein_coding	-0.891983	5.13288	65.6264	5.45032e-16	1.97867e-14
ENSG00000171408	PDE7B	protein_coding	-2.33681	1.081	65.6189	5.47102e-16	1.98011e-14
ENSG00000071575	TRIB2	protein_coding	0.902408	5.02861	65.5485	5.67025e-16	2.04596e-14
ENSG00000134955	SLC37A2	protein_coding	0.73173	6.47967	65.4766	5.88075e-16	2.11546e-14
ENSG00000185215	TNFAIP2	protein_coding	0.700796	6.97691	65.2063	6.74534e-16	2.41912e-14
ENSG00000187741	FANCA	protein_coding	-0.737317	6.38968	65.0399	7.33976e-16	2.62435e-14
ENSG00000155307	SAMSN1	protein_coding	0.92742	4.78691	64.9326	7.75039e-16	2.76283e-14
ENSG00000152580	IGSF10	protein_coding	-0.687267	7.32146	64.8844	7.94253e-16	2.82282e-14
ENSG00000134627	PIWIL4	protein_coding	-0.817833	5.6854	64.675	8.83297e-16	3.12989e-14
ENSG00000198520	ARMH1	protein_coding	-0.739873	6.33932	64.6404	8.98942e-16	3.17581e-14
ENSG00000185950	IRS2	protein_coding	-0.89151	5.06622	64.4332	9.98599e-16	3.51739e-14
ENSG00000090020	SLC9A1	protein_coding	0.767693	5.98544	64.1903	1.12963e-15	3.96711e-14
ENSG00000089693	MLF2	protein_coding	0.693239	7.01755	64.089	1.18922e-15	4.16401e-14
ENSG00000149781	FERMT3	protein_coding	0.705147	6.77766	63.9461	1.27869e-15	4.46409e-14
ENSG00000051341	POLQ	protein_coding	-0.810062	5.69966	63.9275	1.29081e-15	4.49316e-14
ENSG00000108679	LGALS3BP	protein_coding	1.20671	3.48991	63.9139	1.29976e-15	4.51103e-14
ENSG00000115594	IL1R1	protein_coding	1.19282	3.51405	63.7617	1.40419e-15	4.85922e-14
ENSG00000176208	ATAD5	protein_coding	-0.827998	5.5787	63.7508	1.41199e-15	4.87198e-14
ENSG00000068323	TFE3	protein_coding	0.807495	5.7049	63.6037	1.5214e-15	5.23424e-14
ENSG00000170542	SERPINB9	protein_coding	-1.93398	1.69183	63.5911	1.53118e-15	5.25263e-14
ENSG00000129534	MIS18BP1	protein_coding	-0.676363	7.59168	63.5694	1.54816e-15	5.29552e-14
ENSG00000073670	ADAM11	protein_coding	0.993222	4.36176	63.4437	1.65013e-15	5.62804e-14
ENSG00000154359	LONRF1	protein_coding	-0.91333	4.81215	63.2982	1.7767e-15	6.04232e-14
ENSG00000055732	MCOLN3	protein_coding	-5.57308	-0.686169	63.2051	1.86267e-15	6.31514e-14
ENSG00000162783	IER5	protein_coding	0.733472	6.29215	63.1999	1.8676e-15	6.31514e-14
ENSG00000134594	RAB33A	protein_coding	-1.27434	3.26102	63.1496	1.91591e-15	6.46007e-14
ENSG00000148773	MKI67	protein_coding	-0.683642	9.12946	63.0475	2.0178e-15	6.7669e-14
ENSG00000005187	ACSM3	protein_coding	-1.69725	2.13939	63.047	2.01835e-15	6.7669e-14
ENSG00000138160	KIF11	protein_coding	-0.676031	7.35907	63.0308	2.03502e-15	6.80351e-14
ENSG00000147592	LACTB2	protein_coding	-1.27066	3.24108	62.8808	2.19608e-15	7.32129e-14
ENSG00000164109	MAD2L1	protein_coding	-0.69514	6.83112	62.8478	2.23314e-15	7.42393e-14
ENSG00000085719	CPNE3	protein_coding	-0.848034	5.33339	62.6641	2.45147e-15	8.12694e-14
ENSG00000144554	FANCD2	protein_coding	-0.710963	6.54862	62.5889	2.5469e-15	8.41972e-14
ENSG00000111913	RIPOR2	protein_coding	0.930576	4.62491	62.4074	2.79278e-15	9.20683e-14
ENSG00000097046	CDC7	protein_coding	-0.831204	5.46898	62.2559	3.01597e-15	9.91501e-14
ENSG00000244509	APOBEC3C	protein_coding	0.691087	6.82529	62.0423	3.36161e-15	1.10207e-13
ENSG00000182168	UNC5C	protein_coding	-0.668703	7.44933	62.0204	3.39912e-15	1.11129e-13
ENSG00000105835	NAMPT	protein_coding	0.688634	6.84352	61.8781	3.65388e-15	1.19128e-13
ENSG00000140525	FANCI	protein_coding	-0.667546	7.46068	61.7909	3.81927e-15	1.24179e-13
ENSG00000164211	STARD4	protein_coding	-0.706036	6.53332	61.6105	4.18579e-15	1.35723e-13
ENSG00000147854	UHRF2	protein_coding	-0.666031	7.49032	61.5983	4.21173e-15	1.36191e-13
ENSG00000028137	TNFRSF1B	protein_coding	0.667595	8.62748	61.516	4.39155e-15	1.41618e-13
ENSG00000173530	TNFRSF10D	protein_coding	0.782903	5.76933	61.4885	4.45327e-15	1.43218e-13
ENSG00000137812	KNL1	protein_coding	-0.758136	5.9311	61.4042	4.64821e-15	1.49083e-13
ENSG00000171320	ESCO2	protein_coding	-0.941807	4.51062	61.1072	5.40498e-15	1.72886e-13
ENSG00000101294	HM13	protein_coding	0.662447	7.5645	60.9878	5.74309e-15	1.83206e-13
ENSG00000153898	MCOLN2	protein_coding	-0.79862	5.64879	60.8973	6.01305e-15	1.91302e-13
ENSG00000126822	PLEKHG3	protein_coding	0.892575	4.84931	60.797	6.32739e-15	2.00763e-13
ENSG00000253729	PRKDC	protein_coding	-0.673588	9.30061	60.7244	6.56517e-15	2.07751e-13
ENSG00000115165	CYTIP	protein_coding	0.762172	5.86543	60.4985	7.36347e-15	2.32391e-13
ENSG00000130477	UNC13A	protein_coding	2.08653	1.23141	60.4662	7.48514e-15	2.35603e-13
ENSG00000100647	SUSD6	protein_coding	0.715895	6.30618	60.4367	7.59828e-15	2.3853e-13
ENSG00000163807	KIAA1143	protein_coding	-0.819914	5.45734	60.414	7.68626e-15	2.40653e-13
ENSG00000077238	IL4R	protein_coding	0.738269	6.03897	60.4086	7.70751e-15	2.40682e-13
ENSG00000080986	NDC80	protein_coding	-0.75856	5.88665	60.3193	8.06518e-15	2.51188e-13
ENSG00000163535	SGO2	protein_coding	-0.758396	5.88001	60.2352	8.41734e-15	2.61468e-13
ENSG00000119397	CNTRL	protein_coding	-0.658756	7.48276	60.2236	8.46728e-15	2.6233e-13
ENSG00000110092	CCND1	protein_coding	0.873063	4.94372	60.1872	8.62533e-15	2.66529e-13
ENSG00000131747	TOP2A	protein_coding	-0.666128	9.04955	60.1475	8.80095e-15	2.71248e-13
ENSG00000115306	SPTBN1	protein_coding	-0.829922	5.34545	60.0968	9.03041e-15	2.77597e-13
ENSG00000013573	DDX11	protein_coding	-0.699206	6.51953	60.0405	9.29257e-15	2.84916e-13
ENSG00000012048	BRCA1	protein_coding	-0.670506	7.0138	60.0001	9.48524e-15	2.90072e-13
ENSG00000144026	ZNF514	protein_coding	-1.05401	3.92863	59.9357	9.80081e-15	2.9895e-13
ENSG00000167460	TPM4	protein_coding	-0.667818	7.03854	59.6206	1.15026e-14	3.49957e-13
ENSG00000156509	FBXO43	protein_coding	-1.22053	3.28891	59.5749	1.17725e-14	3.57249e-13
ENSG00000184226	PCDH9	protein_coding	-0.807446	5.52036	59.5162	1.21291e-14	3.6713e-13
ENSG00000184985	SORCS2	protein_coding	-1.30804	3.03047	59.3026	1.35197e-14	4.08176e-13
ENSG00000095261	PSMD5	protein_coding	-0.816652	5.4097	59.2462	1.39128e-14	4.18977e-13
ENSG00000189067	LITAF	protein_coding	0.669344	6.92463	59.2372	1.39764e-14	4.19823e-13
ENSG00000136156	ITM2B	protein_coding	0.653086	7.43247	59.1742	1.44314e-14	4.32395e-13
ENSG00000146410	MTFR2	protein_coding	-0.784771	5.65656	59.0792	1.51451e-14	4.52631e-13
ENSG00000170836	PPM1D	protein_coding	0.808659	5.45906	58.9955	1.58032e-14	4.71111e-13
ENSG00000122884	P4HA1	protein_coding	-0.668807	6.93467	58.9768	1.59543e-14	4.7442e-13
ENSG00000147454	SLC25A37	protein_coding	-0.654736	7.32429	58.8913	1.66624e-14	4.94233e-13
ENSG00000183019	MCEMP1	protein_coding	0.8189	5.3596	58.8743	1.6807e-14	4.97276e-13
ENSG00000121064	SCPEP1	protein_coding	0.653208	7.35486	58.8329	1.71651e-14	5.06607e-13
ENSG00000112312	GMNN	protein_coding	-0.723121	6.10948	58.8268	1.72183e-14	5.06912e-13
ENSG00000076356	PLXNA2	protein_coding	1.46114	2.54789	58.5904	1.94166e-14	5.70212e-13
ENSG00000124126	PREX1	protein_coding	0.647978	7.85345	58.5264	2.0058e-14	5.8759e-13
ENSG00000186480	INSIG1	protein_coding	-0.652339	8.72351	58.5094	2.02321e-14	5.91227e-13
ENSG00000205426	KRT81	protein_coding	1.43379	2.66757	58.4459	2.08956e-14	6.09111e-13
ENSG00000159720	ATP6V0D1	protein_coding	0.650743	7.36537	58.4084	2.12977e-14	6.19309e-13
ENSG00000162772	ATF3	protein_coding	1.10215	3.66469	58.2213	2.34232e-14	6.79446e-13
ENSG00000065833	ME1	protein_coding	0.875836	4.79755	58.1818	2.38976e-14	6.91511e-13
ENSG00000163792	TCF23	protein_coding	-0.833817	5.17774	58.0817	2.51457e-14	7.25853e-13
ENSG00000020181	ADGRA2	protein_coding	-0.756669	5.80768	58.0552	2.54867e-14	7.33905e-13
ENSG00000141232	TOB1	protein_coding	0.8495	5.00545	57.9384	2.70458e-14	7.76911e-13
ENSG00000072310	SREBF1	protein_coding	-0.673377	6.73107	57.9262	2.72139e-14	7.79847e-13
ENSG00000005238	FAM214B	protein_coding	0.818267	5.28911	57.6928	3.06417e-14	8.75954e-13
ENSG00000185088	RPS27L	protein_coding	0.643222	7.80912	57.6754	3.09149e-14	8.81632e-13
ENSG00000187479	C11orf96	protein_coding	-5.33412	-0.776971	57.4679	3.43544e-14	9.77366e-13
ENSG00000112414	ADGRG6	protein_coding	-0.733148	5.9303	57.4288	3.50443e-14	9.94602e-13
ENSG00000160588	MPZL3	protein_coding	0.988212	4.10193	57.2333	3.87055e-14	1.09589e-12
ENSG00000154920	EME1	protein_coding	-0.912435	4.50278	57.0322	4.28727e-14	1.21098e-12
ENSG00000109805	NCAPG	protein_coding	-0.670737	6.67081	56.9997	4.35874e-14	1.22823e-12
ENSG00000171115	GIMAP8	protein_coding	1.24806	3.10029	56.9848	4.39201e-14	1.23466e-12
ENSG00000160211	G6PD	protein_coding	0.66302	6.81378	56.9731	4.41808e-14	1.23905e-12
ENSG00000117724	CENPF	protein_coding	-0.644526	8.83055	56.889	4.61106e-14	1.29012e-12
ENSG00000104055	TGM5	protein_coding	0.675249	6.58567	56.8833	4.62462e-14	1.29086e-12
ENSG00000196247	ZNF107	protein_coding	-0.776739	5.60862	56.8614	4.67642e-14	1.30224e-12
ENSG00000104738	MCM4	protein_coding	-0.642054	8.69004	56.7902	4.84886e-14	1.34709e-12
ENSG00000130821	SLC6A8	protein_coding	-1.22131	3.28214	56.6437	5.22392e-14	1.44789e-12
ENSG00000139428	MMAB	protein_coding	-0.750835	5.77837	56.5523	5.47226e-14	1.51318e-12
ENSG00000111052	LIN7A	protein_coding	-0.8384	5.0092	56.4041	5.90082e-14	1.62788e-12
ENSG00000172167	MTBP	protein_coding	-0.870924	4.72935	56.3483	6.07059e-14	1.67082e-12
ENSG00000151725	CENPU	protein_coding	-0.70342	6.14423	56.2886	6.25764e-14	1.71831e-12
ENSG00000101197	BIRC7	protein_coding	-3.018	0.0712031	56.2821	6.27855e-14	1.72006e-12
ENSG00000118193	KIF14	protein_coding	-0.652475	6.90288	56.1053	6.86917e-14	1.87752e-12
ENSG00000162433	AK4	protein_coding	-0.826254	5.11026	56.0914	6.91799e-14	1.88651e-12
ENSG00000084110	HAL	protein_coding	-0.698572	6.18546	55.9705	7.35652e-14	1.9993e-12
ENSG00000139433	GLTP	protein_coding	0.81992	5.14669	55.9682	7.36541e-14	1.9993e-12
ENSG00000018189	RUFY3	protein_coding	-2.3913	0.695553	55.8505	7.81968e-14	2.11775e-12
ENSG00000157827	FMNL2	protein_coding	-1.89988	1.46096	55.7904	8.0623e-14	2.17848e-12
ENSG00000139618	BRCA2	protein_coding	-0.795459	5.3685	55.7346	8.29465e-14	2.23615e-12
ENSG00000146263	MMS22L	protein_coding	-0.686264	6.3147	55.69	8.48471e-14	2.28219e-12
ENSG00000164111	ANXA5	protein_coding	0.630382	8.24161	55.5339	9.18609e-14	2.46525e-12
ENSG00000162430	SELENON	protein_coding	-0.67244	6.49784	55.477	9.4557e-14	2.53186e-12
ENSG00000115295	CLIP4	protein_coding	-1.2406	3.08042	55.465	9.51398e-14	2.54172e-12
ENSG00000162734	PEA15	protein_coding	0.631038	7.43687	55.2672	1.05211e-13	2.80445e-12
ENSG00000124406	ATP8A1	protein_coding	-0.903352	4.45596	55.2136	1.08119e-13	2.87547e-12
ENSG00000171791	BCL2	protein_coding	-0.635627	7.18079	54.8897	1.27489e-13	3.38304e-12
ENSG00000087074	PPP1R15A	protein_coding	0.696536	6.12067	54.8106	1.32721e-13	3.51399e-12
ENSG00000179240	GVQW3	protein_coding	-1.0855	3.59376	54.7523	1.36721e-13	3.6118e-12
ENSG00000002834	LASP1	protein_coding	0.625287	8.23017	54.6239	1.45951e-13	3.84707e-12
ENSG00000140859	KIFC3	protein_coding	1.0012	3.95023	54.5733	1.49756e-13	3.93592e-12
ENSG00000130775	THEMIS2	protein_coding	0.642975	6.91967	54.5692	1.50067e-13	3.93592e-12
ENSG00000138722	MMRN1	protein_coding	-0.625717	7.6887	54.5659	1.5032e-13	3.93592e-12
ENSG00000106799	TGFBR1	protein_coding	0.624459	7.90724	54.4822	1.5686e-13	4.0981e-12
ENSG00000154122	ANKH	protein_coding	0.769225	5.54665	54.4384	1.60396e-13	4.18126e-12
ENSG00000138166	DUSP5	protein_coding	1.07786	3.59635	54.3273	1.69727e-13	4.41477e-12
ENSG00000121152	NCAPH	protein_coding	-0.664702	6.50038	54.283	1.73599e-13	4.50558e-12
ENSG00000118200	CAMSAP2	protein_coding	0.820462	5.01073	54.2261	1.78693e-13	4.62764e-12
ENSG00000120889	TNFRSF10B	protein_coding	0.622725	8.02726	54.1794	1.82998e-13	4.72878e-12
ENSG00000197746	PSAP	protein_coding	0.624385	8.49265	54.1626	1.84563e-13	4.75883e-12
ENSG00000178096	BOLA1	protein_coding	-1.56527	2.12337	54.0803	1.92465e-13	4.9518e-12
ENSG00000057657	PRDM1	protein_coding	1.08822	3.54319	54.011	1.99367e-13	5.11825e-12
ENSG00000121211	MND1	protein_coding	-0.819338	5.01835	53.8714	2.14056e-13	5.48344e-12
ENSG00000147883	CDKN2B	protein_coding	1.34582	2.70401	53.8144	2.20357e-13	5.63266e-12
ENSG00000170627	GTSF1	protein_coding	0.789565	5.2798	53.7817	2.24049e-13	5.7147e-12
ENSG00000135069	PSAT1	protein_coding	-0.63623	6.94565	53.7347	2.29472e-13	5.84044e-12
ENSG00000165821	SALL2	protein_coding	0.971087	4.05128	53.7297	2.3006e-13	5.84283e-12
ENSG00000160957	RECQL4	protein_coding	-0.716966	5.87436	53.644	2.40315e-13	6.09021e-12
ENSG00000266094	RASSF5	protein_coding	0.620195	7.713	53.6247	2.42695e-13	6.13737e-12
ENSG00000172164	SNTB1	protein_coding	-0.646555	6.7373	53.6203	2.43233e-13	6.13787e-12
ENSG00000164749	HNF4G	protein_coding	-2.71863	0.234673	53.4232	2.68905e-13	6.77125e-12
ENSG00000024526	DEPDC1	protein_coding	-0.770805	5.44366	53.3713	2.76104e-13	6.93776e-12
ENSG00000177272	KCNA3	protein_coding	-1.04026	3.7283	53.3458	2.79706e-13	7.01339e-12
ENSG00000103811	CTSH	protein_coding	0.638448	6.85881	53.2888	2.87937e-13	7.20452e-12
ENSG00000164237	CMBL	protein_coding	0.893325	4.41224	53.1453	3.09762e-13	7.71927e-12
ENSG00000108798	ABI3	protein_coding	0.940815	4.18018	53.145	3.09814e-13	7.71927e-12
ENSG00000188610	FAM72B	protein_coding	-0.824997	4.89932	53.101	3.16832e-13	7.87753e-12
ENSG00000122122	SASH3	protein_coding	0.626842	7.13367	53.0907	3.18494e-13	7.90225e-12
ENSG00000176024	ZNF613	protein_coding	-1.60903	1.98232	52.9918	3.3495e-13	8.29317e-12
ENSG00000101104	PABPC1L	protein_coding	-0.708848	5.90097	52.9713	3.38455e-13	8.36246e-12
ENSG00000103995	CEP152	protein_coding	-0.713384	5.86021	52.8928	3.52263e-13	8.68548e-12
ENSG00000213694	S1PR3	protein_coding	-0.766964	5.43287	52.6682	3.94931e-13	9.71728e-12
ENSG00000153885	KCTD15	protein_coding	-0.837801	4.76475	52.6496	3.98701e-13	9.78968e-12
ENSG00000182580	EPHB3	protein_coding	1.31112	2.76221	52.5571	4.17927e-13	1.02405e-11
ENSG00000104951	IL4I1	protein_coding	0.871487	4.52015	52.5406	4.21443e-13	1.03053e-11
ENSG00000197808	ZNF461	protein_coding	-1.61525	1.94306	52.4644	4.38112e-13	1.06908e-11
ENSG00000167767	KRT80	protein_coding	1.33805	2.6784	52.4462	4.42188e-13	1.07681e-11
ENSG00000255587	RAB44	protein_coding	-0.61903	7.27201	52.4337	4.45026e-13	1.08019e-11
ENSG00000168010	ATG16L2	protein_coding	-0.614468	7.53513	52.4294	4.46006e-13	1.08019e-11
ENSG00000112299	VNN1	protein_coding	1.02829	3.72197	52.428	4.46315e-13	1.08019e-11
ENSG00000137563	GGH	protein_coding	-0.745875	5.6044	52.4139	4.49524e-13	1.08367e-11
ENSG00000197747	S100A10	protein_coding	0.747006	5.60904	52.4137	4.49583e-13	1.08367e-11
ENSG00000188643	S100A16	protein_coding	0.961749	4.0383	52.3272	4.69821e-13	1.12891e-11
ENSG00000113070	HBEGF	protein_coding	0.859515	4.56804	52.3254	4.70261e-13	1.12891e-11
ENSG00000162511	LAPTM5	protein_coding	0.624652	9.33272	52.3003	4.76298e-13	1.14109e-11
ENSG00000003989	SLC7A2	protein_coding	-2.50638	0.430955	52.2789	4.8151e-13	1.15125e-11
ENSG00000162144	CYB561A3	protein_coding	0.668388	6.26007	52.2104	4.98614e-13	1.1889e-11
ENSG00000026103	FAS	protein_coding	0.782106	5.22852	52.2078	4.99268e-13	1.1889e-11
ENSG00000196154	S100A4	protein_coding	0.614716	8.65029	52.1788	5.06692e-13	1.20416e-11
ENSG00000109674	NEIL3	protein_coding	-0.770091	5.35852	52.1731	5.08169e-13	1.20525e-11
ENSG00000151849	CENPJ	protein_coding	-0.682042	6.05903	51.8076	6.12154e-13	1.44897e-11
ENSG00000124107	SLPI	protein_coding	0.998012	3.82955	51.7171	6.41005e-13	1.51423e-11
ENSG00000196743	GM2A	protein_coding	0.609838	7.52922	51.7086	6.43792e-13	1.51779e-11
ENSG00000139112	GABARAPL1	protein_coding	0.948668	4.05663	51.6945	6.48448e-13	1.52572e-11
ENSG00000197506	SLC28A3	protein_coding	-0.675729	6.11537	51.6364	6.67918e-13	1.56841e-11
ENSG00000051825	MPHOSPH9	protein_coding	-0.655242	6.37947	51.5149	7.10563e-13	1.66525e-11
ENSG00000157833	GAREM2	protein_coding	-1.30616	2.75859	51.481	7.22952e-13	1.69094e-11
ENSG00000132530	XAF1	protein_coding	-0.915383	4.23076	51.4478	7.35265e-13	1.71634e-11
ENSG00000079385	CEACAM1	protein_coding	2.18584	0.756463	51.3317	7.80075e-13	1.81736e-11
ENSG00000172216	CEBPB	protein_coding	0.811378	4.90245	51.3217	7.84054e-13	1.82304e-11
ENSG00000145555	MYO10	protein_coding	-1.32091	2.71956	51.2981	7.9353e-13	1.84146e-11
ENSG00000186918	ZNF395	protein_coding	-0.728762	5.68238	51.2495	8.13397e-13	1.88387e-11
ENSG00000163406	SLC15A2	protein_coding	-0.757992	5.40273	51.0847	8.84668e-13	2.04493e-11
ENSG00000119969	HELLS	protein_coding	-0.702779	5.83932	51.0445	9.02955e-13	2.08189e-11
ENSG00000147536	GINS4	protein_coding	-0.781117	5.17411	51.0418	9.04177e-13	2.08189e-11
ENSG00000179532	DNHD1	protein_coding	-0.739276	5.5834	50.8754	9.842e-13	2.25906e-11
ENSG00000135924	DNAJB2	protein_coding	1.01285	3.73012	50.8739	9.84941e-13	2.25906e-11
ENSG00000181104	F2R	protein_coding	-0.821622	4.76103	50.6381	1.1107e-12	2.54258e-11
ENSG00000170264	FAM161A	protein_coding	-1.36812	2.51771	50.6062	1.12885e-12	2.57914e-11
ENSG00000127507	ADGRE2	protein_coding	0.697229	5.85598	50.575	1.14694e-12	2.61543e-11
ENSG00000149418	ST14	protein_coding	0.653212	6.32964	50.5654	1.15259e-12	2.62326e-11
ENSG00000125657	TNFSF9	protein_coding	0.822277	4.73462	50.5208	1.1791e-12	2.67843e-11
ENSG00000163040	CCDC74A	protein_coding	-2.32735	0.561221	50.4647	1.21331e-12	2.75086e-11
ENSG00000153208	MERTK	protein_coding	1.0218	3.66578	50.4241	1.23865e-12	2.80294e-11
ENSG00000104093	DMXL2	protein_coding	-0.633864	6.60421	50.384	1.26419e-12	2.85528e-11
ENSG00000145087	STXBP5L	protein_coding	-2.21646	0.710276	50.224	1.37157e-12	3.09192e-11
ENSG00000027075	PRKCH	protein_coding	-1.44139	2.30534	50.1854	1.39885e-12	3.1474e-11
ENSG00000064601	CTSA	protein_coding	0.598943	8.06964	50.1387	1.43257e-12	3.21716e-11
ENSG00000196208	GREB1	protein_coding	1.4223	2.2964	50.128	1.44037e-12	3.22855e-11
ENSG00000205208	C4orf46	protein_coding	-0.754346	5.34659	49.9408	1.58452e-12	3.54495e-11
ENSG00000184730	APOBR	protein_coding	0.598259	7.7148	49.9018	1.61639e-12	3.60944e-11
ENSG00000141837	CACNA1A	protein_coding	0.644406	6.38326	49.8621	1.64936e-12	3.67613e-11
ENSG00000136824	SMC2	protein_coding	-0.608073	7.09079	49.8471	1.66209e-12	3.69753e-11
ENSG00000161921	CXCL16	protein_coding	1.30228	2.68235	49.7713	1.72756e-12	3.83596e-11
ENSG00000123219	CENPK	protein_coding	-0.769233	5.17621	49.7234	1.77025e-12	3.92339e-11
ENSG00000163694	RBM47	protein_coding	1.02959	3.586	49.6389	1.84812e-12	4.08831e-11
ENSG00000143669	LYST	protein_coding	-0.610928	9.6732	49.5924	1.89241e-12	4.17849e-11
ENSG00000102962	CCL22	protein_coding	1.42285	2.27726	49.5878	1.89687e-12	4.18054e-11
ENSG00000185650	ZFP36L1	protein_coding	0.952063	3.9377	49.5477	1.93606e-12	4.25897e-11
ENSG00000105612	DNASE2	protein_coding	1.48122	2.14474	49.5313	1.95236e-12	4.28685e-11
ENSG00000111321	LTBR	protein_coding	0.639483	6.42251	49.498	1.98571e-12	4.34429e-11
ENSG00000197405	C5AR1	protein_coding	1.77877	1.42292	49.4979	1.98586e-12	4.34429e-11
ENSG00000160949	TONSL	protein_coding	-0.681065	5.92246	49.4062	2.08083e-12	4.54365e-11
ENSG00000189007	ADAT2	protein_coding	-0.749876	5.34294	49.3095	2.18601e-12	4.76453e-11
ENSG00000143507	DUSP10	protein_coding	0.749435	5.3297	49.1575	2.3621e-12	5.13887e-11
ENSG00000159788	RGS12	protein_coding	0.747047	5.35796	49.134	2.39059e-12	5.19132e-11
ENSG00000006530	AGK	protein_coding	-2.08484	0.871243	49.0797	2.45776e-12	5.32739e-11
ENSG00000143226	FCGR2A	protein_coding	0.635211	6.43114	49.0409	2.50674e-12	5.42364e-11
ENSG00000162594	IL23R	protein_coding	-1.30134	2.65412	49.0262	2.52572e-12	5.45472e-11
ENSG00000170522	ELOVL6	protein_coding	-0.606507	6.97717	49.0177	2.53664e-12	5.46832e-11
ENSG00000073111	MCM2	protein_coding	-0.603314	7.08109	48.9644	2.60655e-12	5.60883e-11
ENSG00000135473	PAN2	protein_coding	-0.623036	6.64253	48.8949	2.70056e-12	5.80057e-11
ENSG00000134333	LDHA	protein_coding	-0.614066	10.4911	48.8529	2.75892e-12	5.91518e-11
ENSG00000114455	HHLA2	protein_coding	-1.2752	2.75365	48.7899	2.84907e-12	6.09743e-11
ENSG00000080546	SESN1	protein_coding	0.645182	6.25365	48.7217	2.94977e-12	6.29271e-11
ENSG00000262406	MMP12	protein_coding	1.89593	1.11393	48.721	2.95095e-12	6.29271e-11
ENSG00000146918	NCAPG2	protein_coding	-0.603264	7.02125	48.6979	2.98579e-12	6.35553e-11
ENSG00000163145	C1QTNF7	protein_coding	-3.57918	-0.51322	48.6497	3.06011e-12	6.50206e-11
ENSG00000198056	PRIM1	protein_coding	-0.73017	5.49754	48.5394	3.23718e-12	6.86596e-11
ENSG00000163728	TTC14	protein_coding	-0.628825	6.47202	48.4522	3.3844e-12	7.16536e-11
ENSG00000093072	ADA2	protein_coding	0.589787	7.56283	48.4091	3.45958e-12	7.31145e-11
ENSG00000174669	SLC29A2	protein_coding	-0.801245	4.79084	48.3347	3.59332e-12	7.56838e-11
ENSG00000163710	PCOLCE2	protein_coding	-2.91572	-0.103897	48.3323	3.59771e-12	7.56838e-11
ENSG00000112303	VNN2	protein_coding	1.07612	3.34035	48.3309	3.60034e-12	7.56838e-11
ENSG00000119900	OGFRL1	protein_coding	0.587821	7.89764	48.321	3.61856e-12	7.5932e-11
ENSG00000186470	BTN3A2	protein_coding	-0.634673	6.38431	48.3169	3.62619e-12	7.59575e-11
ENSG00000139567	ACVRL1	protein_coding	0.843378	4.45492	48.2673	3.71907e-12	7.77653e-11
ENSG00000177575	CD163	protein_coding	1.37257	2.37453	48.2485	3.75489e-12	7.83759e-11
ENSG00000242732	RTL5	protein_coding	0.91743	4.04676	48.2249	3.80022e-12	7.91825e-11
ENSG00000174501	ANKRD36C	protein_coding	-1.18645	2.96529	48.1653	3.9177e-12	8.12964e-11
ENSG00000120594	PLXDC2	protein_coding	1.16131	3.03641	48.1621	3.92398e-12	8.12964e-11
ENSG00000100284	TOM1	protein_coding	0.719638	5.57349	48.1616	3.92498e-12	8.12964e-11
ENSG00000171757	LRRC34	protein_coding	-0.992304	3.69759	48.1595	3.92916e-12	8.12964e-11
ENSG00000203668	CHML	protein_coding	-0.624921	6.48007	47.9781	4.30999e-12	8.90205e-11
ENSG00000149179	C11orf49	protein_coding	-1.62894	1.73719	47.8878	4.51324e-12	9.3056e-11
ENSG00000162496	DHRS3	protein_coding	1.86131	1.20243	47.8308	4.64632e-12	9.56333e-11
ENSG00000150991	UBC	protein_coding	0.600867	9.80971	47.7767	4.77636e-12	9.81392e-11
ENSG00000133816	MICAL2	protein_coding	0.730994	5.41347	47.7561	4.82679e-12	9.90035e-11
ENSG00000140534	TICRR	protein_coding	-0.683591	5.81367	47.7396	4.8675e-12	9.96659e-11
ENSG00000116991	SIPA1L2	protein_coding	0.852522	4.37256	47.7077	4.94741e-12	1.01127e-10
ENSG00000140678	ITGAX	protein_coding	0.585712	7.44449	47.5964	5.23642e-12	1.0685e-10
ENSG00000112715	VEGFA	protein_coding	-0.624536	6.49375	47.5824	5.2739e-12	1.0743e-10
ENSG00000131981	LGALS3	protein_coding	0.832391	4.48045	47.5474	5.36911e-12	1.09181e-10
ENSG00000114446	IFT57	protein_coding	-0.674565	5.86689	47.4276	5.70729e-12	1.15859e-10
ENSG00000167554	ZNF610	protein_coding	-2.22023	0.593536	47.4222	5.72304e-12	1.1598e-10
ENSG00000130649	CYP2E1	protein_coding	1.33748	2.44157	47.3138	6.04847e-12	1.22365e-10
ENSG00000134574	DDB2	protein_coding	0.595035	7.00953	47.3089	6.06358e-12	1.22461e-10
ENSG00000164362	TERT	protein_coding	-1.74661	1.40574	47.1834	6.46443e-12	1.30335e-10
ENSG00000066294	CD84	protein_coding	-0.717605	5.50881	47.0234	7.0143e-12	1.41181e-10
ENSG00000221869	CEBPD	protein_coding	-0.814355	4.57634	46.923	7.38323e-12	1.48354e-10
ENSG00000166025	AMOTL1	protein_coding	-0.768798	4.95747	46.9123	7.42345e-12	1.48909e-10
ENSG00000263001	GTF2I	protein_coding	-0.714995	5.52943	46.8942	7.49241e-12	1.50038e-10
ENSG00000121797	CCRL2	protein_coding	1.15019	3.01866	46.8822	7.53859e-12	1.50708e-10
ENSG00000175643	RMI2	protein_coding	-0.741655	5.22932	46.8135	7.80749e-12	1.55821e-10
ENSG00000266714	MYO15B	protein_coding	-0.764339	5.00069	46.7218	8.18124e-12	1.63005e-10
ENSG00000159618	ADGRG5	protein_coding	0.674082	5.82665	46.7001	8.27258e-12	1.64548e-10
ENSG00000198092	TMPRSS11F	protein_coding	2.57905	0.084737	46.6698	8.40148e-12	1.66831e-10
ENSG00000070081	NUCB2	protein_coding	-0.579295	8.54165	46.5733	8.82561e-12	1.7496e-10
ENSG00000169442	CD52	protein_coding	1.09753	3.19984	46.5137	9.09804e-12	1.80051e-10
ENSG00000142856	ITGB3BP	protein_coding	-0.727401	5.35063	46.5105	9.11284e-12	1.80051e-10
ENSG00000173848	NET1	protein_coding	-0.711765	5.52135	46.467	9.3174e-12	1.83786e-10
ENSG00000111252	SH2B3	protein_coding	0.596873	6.82593	46.4424	9.43515e-12	1.85799e-10
ENSG00000064393	HIPK2	protein_coding	0.667793	5.84976	46.3694	9.79328e-12	1.92531e-10
ENSG00000103485	QPRT	protein_coding	0.619218	6.41353	46.3275	1.00048e-11	1.96363e-10
ENSG00000089127	OAS1	protein_coding	0.913949	3.98233	46.2866	1.02161e-11	2.00179e-10
ENSG00000139044	B4GALNT3	protein_coding	0.731998	5.27932	46.2784	1.02588e-11	2.00682e-10
ENSG00000142405	NLRP12	protein_coding	0.962289	3.74254	46.1182	1.11327e-11	2.17419e-10
ENSG00000133805	AMPD3	protein_coding	0.667939	5.83474	46.1006	1.12332e-11	2.19019e-10
ENSG00000143119	CD53	protein_coding	0.573683	8.07132	46.0406	1.15829e-11	2.25466e-10
ENSG00000130598	TNNI2	protein_coding	1.92689	0.989392	46.0153	1.17334e-11	2.28021e-10
ENSG00000108947	EFNB3	protein_coding	-3.10726	-0.339573	45.997	1.18435e-11	2.29783e-10
ENSG00000185198	PRSS57	protein_coding	-1.36611	2.30459	45.9346	1.22269e-11	2.36833e-10
ENSG00000102032	RENBP	protein_coding	0.949094	3.78484	45.8419	1.2819e-11	2.47897e-10
ENSG00000120699	EXOSC8	protein_coding	-0.62443	6.28015	45.8229	1.29443e-11	2.49912e-10
ENSG00000011105	TSPAN9	protein_coding	0.940165	3.80756	45.7923	1.31477e-11	2.53426e-10
ENSG00000146232	NFKBIE	protein_coding	0.664739	5.84469	45.7575	1.33833e-11	2.57548e-10
ENSG00000109906	ZBTB16	protein_coding	-3.7192	-0.67494	45.7035	1.3758e-11	2.64327e-10
ENSG00000134874	DZIP1	protein_coding	-0.751611	5.01766	45.5595	1.48073e-11	2.84026e-10
ENSG00000172179	PRL	protein_coding	1.97679	0.826358	45.5364	1.49826e-11	2.86924e-10
ENSG00000129173	E2F8	protein_coding	-0.700481	5.56289	45.5041	1.52321e-11	2.91232e-10
ENSG00000166311	SMPD1	protein_coding	0.826192	4.40846	45.4382	1.57528e-11	3.00701e-10
ENSG00000221890	NPTXR	protein_coding	0.728485	5.2381	45.352	1.64624e-11	3.13739e-10
ENSG00000168268	NT5DC2	protein_coding	0.594569	6.73924	45.2923	1.69717e-11	3.22926e-10
ENSG00000186767	SPIN4	protein_coding	-0.848856	4.26545	45.2819	1.70621e-11	3.24125e-10
ENSG00000100749	VRK1	protein_coding	-0.611777	6.40532	45.2361	1.74655e-11	3.31257e-10
ENSG00000181467	RAP2B	protein_coding	0.5848	6.90896	45.2231	1.75817e-11	3.32928e-10
ENSG00000147614	ATP6V0D2	protein_coding	1.6205	1.5957	45.1867	1.79114e-11	3.38628e-10
ENSG00000065328	MCM10	protein_coding	-0.640204	6.00219	45.1561	1.8194e-11	3.43423e-10
ENSG00000113269	RNF130	protein_coding	0.58588	6.87665	45.0911	1.88081e-11	3.54449e-10
ENSG00000100906	NFKBIA	protein_coding	0.662583	5.82064	45.0573	1.91353e-11	3.60042e-10
ENSG00000196460	RFX8	protein_coding	-0.692837	5.59176	45.0473	1.9233e-11	3.61307e-10
ENSG00000143401	ANP32E	protein_coding	-0.566651	8.27753	44.958	2.01302e-11	3.77562e-10
ENSG00000135245	HILPDA	protein_coding	-0.774436	4.76227	44.9325	2.03946e-11	3.81914e-10
ENSG00000158258	CLSTN2	protein_coding	-0.568628	7.40056	44.853	2.12393e-11	3.9676e-10
ENSG00000103540	CCP110	protein_coding	-0.643567	5.95562	44.8486	2.12876e-11	3.9676e-10
ENSG00000158104	HPD	protein_coding	1.21145	2.76775	44.8485	2.12879e-11	3.9676e-10
ENSG00000137807	KIF23	protein_coding	-0.609255	6.40634	44.8449	2.13281e-11	3.96883e-10
ENSG00000142621	FHAD1	protein_coding	-2.81855	-0.171282	44.7289	2.26291e-11	4.20432e-10
ENSG00000169413	RNASE6	protein_coding	0.735634	5.10363	44.6546	2.35051e-11	4.36023e-10
ENSG00000125753	VASP	protein_coding	0.564742	8.19189	44.6293	2.38102e-11	4.40992e-10
ENSG00000134107	BHLHE40	protein_coding	0.724546	5.23782	44.6102	2.40432e-11	4.44611e-10
ENSG00000147852	VLDLR	protein_coding	-0.636545	5.99895	44.5315	2.50303e-11	4.62143e-10
ENSG00000137767	SQOR	protein_coding	0.56903	7.29405	44.4942	2.55106e-11	4.70277e-10
ENSG00000019991	HGF	protein_coding	-1.05159	3.27056	44.4656	2.5887e-11	4.76473e-10
ENSG00000164300	SERINC5	protein_coding	0.739218	5.02686	44.3589	2.73372e-11	5.02386e-10
ENSG00000284946	AC068831.7	protein_coding	-0.861063	4.15294	44.3434	2.75536e-11	5.05576e-10
ENSG00000185513	L3MBTL1	protein_coding	-1.88641	1.02389	44.3171	2.79266e-11	5.11627e-10
ENSG00000134686	PHC2	protein_coding	0.599679	6.47478	44.1016	3.11773e-11	5.70299e-10
ENSG00000204856	FAM216A	protein_coding	-0.696232	5.48859	44.0933	3.13088e-11	5.71821e-10
ENSG00000113758	DBN1	protein_coding	0.614081	6.25718	44.0783	3.15501e-11	5.75339e-10
ENSG00000018280	SLC11A1	protein_coding	0.714445	5.2866	44.0623	3.18084e-11	5.78497e-10
ENSG00000172081	MOB3A	protein_coding	0.563067	8.52741	44.0616	3.1821e-11	5.78497e-10
ENSG00000113161	HMGCR	protein_coding	-0.561523	7.80078	44.0545	3.19361e-11	5.79698e-10
ENSG00000130529	TRPM4	protein_coding	0.593799	6.57471	44.0091	3.26854e-11	5.92392e-10
ENSG00000179583	CIITA	protein_coding	-1.05253	3.25055	43.9504	3.36808e-11	6.09499e-10
ENSG00000196517	SLC6A9	protein_coding	-2.2785	0.371485	43.872	3.50565e-11	6.33425e-10
ENSG00000172243	CLEC7A	protein_coding	1.11465	3.00668	43.8686	3.51173e-11	6.33557e-10
ENSG00000101916	TLR8	protein_coding	0.787003	4.54846	43.8059	3.62602e-11	6.53181e-10
ENSG00000084112	SSH1	protein_coding	0.594235	6.51194	43.6652	3.89637e-11	7.00814e-10
ENSG00000186862	PDZD7	protein_coding	-0.770366	4.68622	43.5787	4.07245e-11	7.31372e-10
ENSG00000148180	GSN	protein_coding	0.566046	7.17649	43.5448	4.14362e-11	7.43027e-10
ENSG00000004468	CD38	protein_coding	-0.600306	6.40211	43.5258	4.18408e-11	7.49147e-10
ENSG00000155189	AGPAT5	protein_coding	-0.581366	6.73413	43.4241	4.40721e-11	7.87905e-10
ENSG00000185100	ADSSL1	protein_coding	-1.53489	1.81485	43.2754	4.75528e-11	8.4885e-10
ENSG00000047249	ATP6V1H	protein_coding	0.609088	6.23092	43.1988	4.94519e-11	8.81421e-10
ENSG00000064933	PMS1	protein_coding	-0.711604	5.21966	43.1365	5.10498e-11	9.08532e-10
ENSG00000164985	PSIP1	protein_coding	-0.571068	6.9106	43.1123	5.16852e-11	9.1846e-10
ENSG00000186185	KIF18B	protein_coding	-0.606962	6.25664	43.0709	5.27922e-11	9.36726e-10
ENSG00000228716	DHFR	protein_coding	-0.595577	6.42355	43.054	5.325e-11	9.42394e-10
ENSG00000135976	ANKRD36	protein_coding	-1.03916	3.25746	43.0532	5.32709e-11	9.42394e-10
ENSG00000105048	TNNT1	protein_coding	0.581209	6.69307	43.0415	5.35911e-11	9.46643e-10
ENSG00000149294	NCAM1	protein_coding	-0.59215	6.48104	43.0348	5.37751e-11	9.48477e-10
ENSG00000168078	PBK	protein_coding	-0.769031	4.63035	42.9919	5.49679e-11	9.68073e-10
ENSG00000122223	CD244	protein_coding	0.60098	6.33276	42.9838	5.51954e-11	9.70636e-10
ENSG00000049249	TNFRSF9	protein_coding	1.64666	1.37562	42.7984	6.0683e-11	1.06555e-09
ENSG00000117586	TNFSF4	protein_coding	1.0031	3.36352	42.7279	6.29073e-11	1.10297e-09
ENSG00000103642	LACTB	protein_coding	0.70066	5.28847	42.6682	6.48583e-11	1.1355e-09
ENSG00000161681	SHANK1	protein_coding	-0.726436	5.02341	42.6621	6.50614e-11	1.13737e-09
ENSG00000116830	TTF2	protein_coding	-0.580664	6.64693	42.6433	6.5688e-11	1.14663e-09
ENSG00000121858	TNFSF10	protein_coding	-0.621199	6.00551	42.591	6.74707e-11	1.17577e-09
ENSG00000135677	GNS	protein_coding	0.555809	8.73329	42.5858	6.76471e-11	1.17577e-09
ENSG00000184661	CDCA2	protein_coding	-0.665808	5.64864	42.5856	6.76552e-11	1.17577e-09
ENSG00000161544	CYGB	protein_coding	2.14185	0.45081	42.5666	6.83147e-11	1.18549e-09
ENSG00000049130	KITLG	protein_coding	1.423	1.93908	42.4629	7.20354e-11	1.24823e-09
ENSG00000205189	ZBTB10	protein_coding	-0.852301	4.08794	42.4588	7.21852e-11	1.24899e-09
ENSG00000151835	SACS	protein_coding	-0.558775	7.15771	42.4355	7.30524e-11	1.26215e-09
ENSG00000145390	USP53	protein_coding	0.788874	4.44724	42.3631	7.58082e-11	1.30786e-09
ENSG00000169679	BUB1	protein_coding	-0.556502	7.21894	42.3133	7.77608e-11	1.33959e-09
ENSG00000133678	TMEM254	protein_coding	-0.860032	4.04566	42.3057	7.80646e-11	1.34287e-09
ENSG00000121053	EPX	protein_coding	-2.1746	0.427278	42.1877	8.29182e-11	1.42429e-09
ENSG00000179639	FCER1A	protein_coding	0.910503	3.76617	42.1093	8.631e-11	1.4804e-09
ENSG00000101160	CTSZ	protein_coding	0.555092	8.96336	42.0343	8.96871e-11	1.5361e-09
ENSG00000163507	CIP2A	protein_coding	-0.66176	5.64425	42.0302	8.98754e-11	1.5371e-09
ENSG00000163462	TRIM46	protein_coding	-1.23458	2.53304	42.0059	9.10001e-11	1.55409e-09
ENSG00000123080	CDKN2C	protein_coding	-0.601551	6.21818	41.9584	9.32337e-11	1.58994e-09
ENSG00000135094	SDS	protein_coding	1.91228	0.785795	41.941	9.40708e-11	1.60191e-09
ENSG00000116260	QSOX1	protein_coding	0.554721	9.00702	41.9001	9.60594e-11	1.63342e-09
ENSG00000091651	ORC6	protein_coding	-0.636747	5.83552	41.8947	9.63245e-11	1.63396e-09
ENSG00000283787	PRR33	protein_coding	1.46275	1.85408	41.8938	9.63673e-11	1.63396e-09
ENSG00000171724	VAT1L	protein_coding	-0.551155	8.73135	41.8757	9.72622e-11	1.64678e-09
ENSG00000144395	CCDC150	protein_coding	-0.96652	3.50631	41.8229	9.99277e-11	1.68949e-09
ENSG00000250510	GPR162	protein_coding	0.969418	3.47636	41.8145	1.00357e-10	1.69434e-09
ENSG00000020633	RUNX3	protein_coding	0.663885	5.61363	41.7934	1.01445e-10	1.71025e-09
ENSG00000166501	PRKCB	protein_coding	-0.570176	6.73875	41.742	1.04149e-10	1.75335e-09
ENSG00000122547	EEPD1	protein_coding	0.731879	4.87441	41.6956	1.06647e-10	1.79285e-09
ENSG00000117594	HSD11B1	protein_coding	-0.910422	3.75355	41.6784	1.07592e-10	1.80617e-09
ENSG00000050438	SLC4A8	protein_coding	0.806748	4.29589	41.659	1.08666e-10	1.82162e-09
ENSG00000161509	GRIN2C	protein_coding	1.49708	1.71487	41.6531	1.08995e-10	1.82455e-09
ENSG00000161791	FMNL3	protein_coding	0.576486	6.58584	41.6053	1.1169e-10	1.86702e-09
ENSG00000117632	STMN1	protein_coding	-0.554893	9.19022	41.5777	1.13279e-10	1.89092e-09
ENSG00000129625	REEP5	protein_coding	0.603823	6.13361	41.5539	1.14666e-10	1.91138e-09
ENSG00000127564	PKMYT1	protein_coding	-0.862727	3.99261	41.4669	1.19886e-10	1.99557e-09
ENSG00000131389	SLC6A6	protein_coding	0.554876	7.05674	41.428	1.2229e-10	2.03273e-09
ENSG00000107331	ABCA2	protein_coding	-0.603001	6.14253	41.4078	1.23566e-10	2.05107e-09
ENSG00000113296	THBS4	protein_coding	-0.731313	4.86072	41.3718	1.2586e-10	2.08621e-09
ENSG00000007944	MYLIP	protein_coding	-0.67394	5.49082	41.3326	1.28409e-10	2.12402e-09
ENSG00000198682	PAPSS2	protein_coding	1.03431	3.17137	41.3312	1.285e-10	2.12402e-09
ENSG00000197019	SERTAD1	protein_coding	0.97825	3.40761	41.2888	1.31321e-10	2.16762e-09
ENSG00000138180	CEP55	protein_coding	-0.609556	6.02174	41.2473	1.34135e-10	2.20922e-09
ENSG00000165392	WRN	protein_coding	-0.69632	5.21406	41.2462	1.34214e-10	2.20922e-09
ENSG00000150627	WDR17	protein_coding	-0.90298	3.76227	41.2347	1.35004e-10	2.21913e-09
ENSG00000114268	PFKFB4	protein_coding	-0.681712	5.49934	41.195	1.37771e-10	2.26147e-09
ENSG00000107551	RASSF4	protein_coding	-0.542959	7.91003	41.1727	1.39357e-10	2.28433e-09
ENSG00000160233	LRRC3	protein_coding	-2.74003	-0.246398	41.1452	1.41331e-10	2.31349e-09
ENSG00000090659	CD209	protein_coding	0.730008	4.83467	41.0534	1.48125e-10	2.42135e-09
ENSG00000196387	ZNF140	protein_coding	-1.0669	3.0494	40.9986	1.52335e-10	2.48673e-09
ENSG00000164649	CDCA7L	protein_coding	-0.567883	6.67396	40.9873	1.53218e-10	2.49771e-09
ENSG00000112576	CCND3	protein_coding	0.552372	9.35135	40.9509	1.56099e-10	2.54117e-09
ENSG00000163281	GNPDA2	protein_coding	-0.849437	4.01569	40.9149	1.59007e-10	2.58495e-09
ENSG00000067182	TNFRSF1A	protein_coding	0.547766	7.17199	40.8193	1.66977e-10	2.71079e-09
ENSG00000140931	CMTM3	protein_coding	0.54208	7.39749	40.7858	1.69864e-10	2.75389e-09
ENSG00000159086	PAXBP1	protein_coding	-0.570659	6.57486	40.7346	1.74371e-10	2.82309e-09
ENSG00000095564	BTAF1	protein_coding	-0.562243	6.74434	40.7	1.77487e-10	2.86815e-09
ENSG00000145386	CCNA2	protein_coding	-0.555238	6.8949	40.6983	1.77639e-10	2.86815e-09
ENSG00000169607	CKAP2L	protein_coding	-0.623577	5.86476	40.6771	1.7958e-10	2.89554e-09
ENSG00000167600	CYP2S1	protein_coding	0.60388	6.0456	40.6313	1.83836e-10	2.96013e-09
ENSG00000060237	WNK1	protein_coding	0.538122	8.34705	40.5704	1.89661e-10	3.04977e-09
ENSG00000119866	BCL11A	protein_coding	-0.594016	6.17314	40.5513	1.91525e-10	3.07558e-09
ENSG00000093009	CDC45	protein_coding	-0.577046	6.4397	40.5013	1.96485e-10	3.14433e-09
ENSG00000139220	PPFIA2	protein_coding	2.35318	0.0257802	40.4999	1.96628e-10	3.14433e-09
ENSG00000167513	CDT1	protein_coding	-0.628341	5.82227	40.4993	1.96684e-10	3.14433e-09
ENSG00000196182	STK40	protein_coding	0.597294	6.12116	40.4975	1.96869e-10	3.14433e-09
ENSG00000185262	UBALD2	protein_coding	0.603928	6.0232	40.468	1.99862e-10	3.18783e-09
ENSG00000128524	ATP6V1F	protein_coding	0.577694	6.41777	40.4255	2.04258e-10	3.25356e-09
ENSG00000177614	PGBD5	protein_coding	-2.6358	-0.176745	40.395	2.07477e-10	3.30038e-09
ENSG00000159176	CSRP1	protein_coding	0.537194	7.94225	40.3741	2.09708e-10	3.3314e-09
ENSG00000108702	CCL1	protein_coding	2.00915	0.527792	40.3598	2.11239e-10	3.35123e-09
ENSG00000235750	KIAA0040	protein_coding	0.796332	4.28238	40.3325	2.14217e-10	3.39392e-09
ENSG00000116774	OLFML3	protein_coding	0.956757	3.45719	40.2912	2.18789e-10	3.46173e-09
ENSG00000168779	SHOX2	protein_coding	-0.633099	5.76134	40.2565	2.22708e-10	3.51902e-09
ENSG00000073282	TP63	protein_coding	-1.58897	1.4154	40.2105	2.28024e-10	3.59823e-09
ENSG00000166523	CLEC4E	protein_coding	0.817184	4.15223	40.2018	2.2904e-10	3.60944e-09
ENSG00000120280	CXorf21	protein_coding	-0.535521	8.03017	40.1492	2.3529e-10	3.703e-09
ENSG00000197299	BLM	protein_coding	-0.6171	5.88431	40.0991	2.41405e-10	3.79419e-09
ENSG00000158769	F11R	protein_coding	0.734626	4.69123	40.0782	2.43995e-10	3.82823e-09
ENSG00000008516	MMP25	protein_coding	0.669801	5.40879	40.0764	2.44217e-10	3.82823e-09
ENSG00000131080	EDA2R	protein_coding	0.670056	5.39484	40.0272	2.5045e-10	3.92074e-09
ENSG00000182544	MFSD5	protein_coding	0.592515	6.13773	40.0115	2.52478e-10	3.94727e-09
ENSG00000149177	PTPRJ	protein_coding	0.534704	7.64263	39.921	2.64445e-10	4.1289e-09
ENSG00000146247	PHIP	protein_coding	-0.535764	7.37553	39.8156	2.79104e-10	4.34978e-09
ENSG00000267041	ZNF850	protein_coding	-0.977438	3.33694	39.8141	2.79326e-10	4.34978e-09
ENSG00000106070	GRB10	protein_coding	-0.658568	5.51675	39.7257	2.9226e-10	4.5452e-09
ENSG00000143476	DTL	protein_coding	-0.543598	7.04558	39.7057	2.9527e-10	4.58598e-09
ENSG00000221968	FADS3	protein_coding	0.967183	3.37304	39.6934	2.97135e-10	4.60891e-09
ENSG00000059588	TARBP1	protein_coding	-0.532653	7.69054	39.6334	3.06402e-10	4.74643e-09
ENSG00000170312	CDK1	protein_coding	-0.542889	7.04649	39.6232	3.08007e-10	4.76504e-09
ENSG00000107566	ERLIN1	protein_coding	-0.531619	8.08224	39.5745	3.15782e-10	4.87896e-09
ENSG00000152926	ZNF117	protein_coding	-0.678118	5.25071	39.5676	3.16895e-10	4.88977e-09
ENSG00000170379	TCAF2	protein_coding	-3.00788	-0.50586	39.5309	3.22905e-10	4.97601e-09
ENSG00000196562	SULF2	protein_coding	0.882746	3.76835	39.4906	3.29642e-10	5.07323e-09
ENSG00000154760	SLFN13	protein_coding	-0.818577	4.10618	39.4078	3.43918e-10	5.28607e-09
ENSG00000126787	DLGAP5	protein_coding	-0.567559	6.45461	39.3737	3.49971e-10	5.37212e-09
ENSG00000198865	CCDC152	protein_coding	-1.34977	2.01332	39.2431	3.7418e-10	5.73629e-09
ENSG00000148841	ITPRIP	protein_coding	0.657864	5.46134	39.1813	3.86215e-10	5.91313e-09
ENSG00000173041	ZNF680	protein_coding	-0.883557	3.73261	39.1184	3.98875e-10	6.09907e-09
ENSG00000166908	PIP4K2C	protein_coding	0.656299	5.47342	39.1077	4.01067e-10	6.12468e-09
ENSG00000160179	ABCG1	protein_coding	-0.973436	3.32214	39.0431	4.14557e-10	6.32253e-09
ENSG00000124795	DEK	protein_coding	-0.527694	7.94884	38.986	4.26864e-10	6.50185e-09
ENSG00000180530	NRIP1	protein_coding	-0.537082	7.08591	38.9571	4.33232e-10	6.59036e-09
ENSG00000120539	MASTL	protein_coding	-0.651812	5.4989	38.8558	4.56287e-10	6.93216e-09
ENSG00000184640	SEPTIN9	protein_coding	0.527226	7.66656	38.8064	4.67983e-10	7.10074e-09
ENSG00000062822	POLD1	protein_coding	-0.588755	6.06923	38.7779	4.74881e-10	7.19617e-09
ENSG00000104814	MAP4K1	protein_coding	-0.575292	6.26	38.6679	5.0241e-10	7.60361e-09
ENSG00000175265	GOLGA8A	protein_coding	-0.588921	6.04006	38.6494	5.07199e-10	7.66628e-09
ENSG00000130766	SESN2	protein_coding	0.713779	4.76883	38.5205	5.41822e-10	8.17916e-09
ENSG00000109084	TMEM97	protein_coding	-0.581197	6.13646	38.4889	5.50651e-10	8.30186e-09
ENSG00000107738	VSIR	protein_coding	0.526898	7.38353	38.4852	5.51691e-10	8.30695e-09
ENSG00000146243	IRAK1BP1	protein_coding	-1.05002	2.98168	38.4735	5.5503e-10	8.3466e-09
ENSG00000080839	RBL1	protein_coding	-0.588917	6.01525	38.4534	5.60773e-10	8.42226e-09
ENSG00000088827	SIGLEC1	protein_coding	0.746765	4.5031	38.3869	5.80217e-10	8.70325e-09
ENSG00000130024	PHF10	protein_coding	-0.525005	7.43564	38.38	5.82255e-10	8.72276e-09
ENSG00000112294	ALDH5A1	protein_coding	-0.551651	6.6205	38.3561	5.89423e-10	8.819e-09
ENSG00000033100	CHPF2	protein_coding	0.582935	6.09318	38.319	6.00748e-10	8.97708e-09
ENSG00000187840	EIF4EBP1	protein_coding	-0.564192	6.39065	38.3099	6.03567e-10	9.00784e-09
ENSG00000283486	FAM95C	protein_coding	-1.08295	2.86963	38.3022	6.05952e-10	9.03204e-09
ENSG00000125462	C1orf61	protein_coding	2.38216	-0.0796285	38.1899	6.41827e-10	9.55475e-09
ENSG00000052802	MSMO1	protein_coding	-0.594716	5.94009	38.1469	6.5613e-10	9.7554e-09
ENSG00000061492	WNT8A	protein_coding	2.94336	-0.586033	38.1105	6.6848e-10	9.92655e-09
ENSG00000167508	MVD	protein_coding	-0.663378	5.3057	38.0907	6.75315e-10	1.00155e-08
ENSG00000077585	GPR137B	protein_coding	0.671929	5.17306	38.0875	6.76406e-10	1.00191e-08
ENSG00000276180	HIST1H4I	protein_coding	0.682266	5.06635	38.0693	6.82744e-10	1.01003e-08
ENSG00000123485	HJURP	protein_coding	-0.576757	6.13902	37.9435	7.28233e-10	1.07553e-08
ENSG00000163818	LZTFL1	protein_coding	-0.719872	4.65025	37.9419	7.28837e-10	1.07553e-08
ENSG00000004809	SLC22A16	protein_coding	-0.709953	4.75175	37.857	7.61243e-10	1.12196e-08
ENSG00000141013	GAS8	protein_coding	-1.23295	2.31094	37.8424	7.66984e-10	1.12901e-08
ENSG00000101298	SNPH	protein_coding	2.93367	-0.570033	37.7165	8.18105e-10	1.20277e-08
ENSG00000177084	POLE	protein_coding	-0.519534	7.61409	37.6403	8.50707e-10	1.24915e-08
ENSG00000141447	OSBPL1A	protein_coding	-0.660945	5.25801	37.5779	8.78351e-10	1.28814e-08
ENSG00000123473	STIL	protein_coding	-0.580855	6.02422	37.519	9.05282e-10	1.32599e-08
ENSG00000076716	GPC4	protein_coding	1.03784	2.96034	37.4542	9.35835e-10	1.36905e-08
ENSG00000135744	AGT	protein_coding	0.521715	7.29011	37.4457	9.39944e-10	1.37336e-08
ENSG00000124731	TREM1	protein_coding	0.641873	5.51666	37.4395	9.42931e-10	1.37603e-08
ENSG00000198795	ZNF521	protein_coding	-0.546651	6.58501	37.4281	9.4847e-10	1.38241e-08
ENSG00000076662	ICAM3	protein_coding	0.89595	3.57171	37.4224	9.51217e-10	1.38471e-08
ENSG00000130066	SAT1	protein_coding	0.523443	7.20003	37.3746	9.74849e-10	1.41736e-08
ENSG00000141504	SAT2	protein_coding	0.843755	3.82904	37.3673	9.78477e-10	1.42089e-08
ENSG00000116984	MTR	protein_coding	-0.541039	6.69363	37.3478	9.88332e-10	1.43345e-08
ENSG00000167524	RSKR	protein_coding	-0.735011	4.49361	37.311	1.00717e-09	1.45739e-08
ENSG00000174938	SEZ6L2	protein_coding	0.798528	4.0902	37.3107	1.00731e-09	1.45739e-08
ENSG00000014914	MTMR11	protein_coding	-0.65374	5.32157	37.2272	1.05139e-09	1.51932e-08
ENSG00000020922	MRE11	protein_coding	-0.551158	6.45936	37.2193	1.05565e-09	1.52362e-08
ENSG00000120913	PDLIM2	protein_coding	0.696751	4.80938	37.1184	1.11168e-09	1.60253e-08
ENSG00000080503	SMARCA2	protein_coding	-0.515797	7.53169	37.0994	1.12256e-09	1.61625e-08
ENSG00000067113	PLPP1	protein_coding	1.11209	2.68041	36.995	1.18434e-09	1.70311e-08
ENSG00000116717	GADD45A	protein_coding	0.71665	4.58845	36.9704	1.19937e-09	1.72264e-08
ENSG00000079263	SP140	protein_coding	1.07579	2.81071	36.9369	1.22015e-09	1.75036e-08
ENSG00000156414	TDRD9	protein_coding	0.972337	3.19629	36.9287	1.22527e-09	1.75558e-08
ENSG00000132424	PNISR	protein_coding	-0.514137	8.45972	36.8962	1.24587e-09	1.78294e-08
ENSG00000226479	TMEM185B	protein_coding	-0.59701	5.82978	36.7847	1.31922e-09	1.88562e-08
ENSG00000197249	SERPINA1	protein_coding	1.24579	2.18715	36.7808	1.32184e-09	1.88696e-08
ENSG00000010318	PHF7	protein_coding	-0.78576	4.13237	36.7786	1.32334e-09	1.88696e-08
ENSG00000111110	PPM1H	protein_coding	0.904553	3.47369	36.7546	1.33975e-09	1.90805e-08
ENSG00000172638	EFEMP2	protein_coding	-1.48787	1.50654	36.6865	1.3874e-09	1.97355e-08
ENSG00000161671	EMC10	protein_coding	-0.605729	5.75666	36.6827	1.39007e-09	1.97496e-08
ENSG00000165490	DDIAS	protein_coding	-0.652116	5.26071	36.6724	1.39742e-09	1.98303e-08
ENSG00000198885	ITPRIPL1	protein_coding	-0.907638	3.47594	36.6494	1.41403e-09	2.0042e-08
ENSG00000103569	AQP9	protein_coding	1.54931	1.26147	36.4926	1.53244e-09	2.16942e-08
ENSG00000147364	FBXO25	protein_coding	-0.664182	5.10114	36.4599	1.55838e-09	2.20352e-08
ENSG00000068885	IFT80	protein_coding	-0.696837	4.73343	36.4529	1.564e-09	2.20882e-08
ENSG00000136492	BRIP1	protein_coding	-0.693122	4.7671	36.4331	1.57995e-09	2.22651e-08
ENSG00000175602	CCDC85B	protein_coding	-0.963062	3.23076	36.4327	1.58029e-09	2.22651e-08
ENSG00000165795	NDRG2	protein_coding	0.541669	6.52893	36.3929	1.61288e-09	2.26973e-08
ENSG00000135956	TMEM127	protein_coding	0.524031	6.91451	36.3607	1.6398e-09	2.30472e-08
ENSG00000166845	C18orf54	protein_coding	-0.765711	4.21836	36.3585	1.64164e-09	2.30472e-08
ENSG00000136997	MYC	protein_coding	-0.510047	8.44185	36.3239	1.67098e-09	2.34313e-08
ENSG00000171860	C3AR1	protein_coding	0.93241	3.34448	36.3131	1.68028e-09	2.35339e-08
ENSG00000168306	ACOX2	protein_coding	0.970931	3.16545	36.2381	1.74626e-09	2.44291e-08
ENSG00000138172	CALHM2	protein_coding	0.686595	4.83812	36.2355	1.74859e-09	2.44328e-08
ENSG00000003987	MTMR7	protein_coding	-1.24072	2.16619	36.1702	1.80812e-09	2.52348e-08
ENSG00000146592	CREB5	protein_coding	1.05638	2.81997	36.119	1.85632e-09	2.5877e-08
ENSG00000117155	SSX2IP	protein_coding	-0.673259	4.95415	36.1147	1.86037e-09	2.5903e-08
ENSG00000187498	COL4A1	protein_coding	-0.971275	3.15911	36.0912	1.88297e-09	2.61868e-08
ENSG00000213462	ERV3-1	protein_coding	-0.771414	4.17446	36.0688	1.90476e-09	2.64587e-08
ENSG00000196083	IL1RAP	protein_coding	-0.566438	6.06143	36.0124	1.96069e-09	2.72037e-08
ENSG00000256223	ZNF10	protein_coding	-1.41471	1.6456	35.9915	1.98181e-09	2.74645e-08
ENSG00000166669	ATF7IP2	protein_coding	-0.770463	4.17145	35.96	2.01414e-09	2.788e-08
ENSG00000068831	RASGRP2	protein_coding	-0.506971	7.8089	35.9295	2.04592e-09	2.82858e-08
ENSG00000145949	MYLK4	protein_coding	-0.759207	4.23634	35.9273	2.04824e-09	2.82858e-08
ENSG00000124613	ZNF391	protein_coding	-2.74888	-0.477035	35.9006	2.0765e-09	2.86426e-08
ENSG00000163322	ABRAXAS1	protein_coding	-0.715251	4.52198	35.8757	2.10315e-09	2.89764e-08
ENSG00000087086	FTL	protein_coding	0.534634	11.9221	35.8401	2.14195e-09	2.94767e-08
ENSG00000197965	MPZL1	protein_coding	0.799247	3.97002	35.782	2.20681e-09	3.0306e-08
ENSG00000058804	NDC1	protein_coding	-0.518839	6.9334	35.7815	2.20733e-09	3.0306e-08
ENSG00000101868	POLA1	protein_coding	-0.555062	6.21509	35.7775	2.21182e-09	3.03325e-08
ENSG00000154059	IMPACT	protein_coding	-0.672371	4.92072	35.7442	2.24998e-09	3.082e-08
ENSG00000139734	DIAPH3	protein_coding	-0.693179	4.68739	35.6045	2.41733e-09	3.30741e-08
ENSG00000134884	ARGLU1	protein_coding	-0.507538	7.32539	35.5701	2.46035e-09	3.36238e-08
ENSG00000144655	CSRNP1	protein_coding	0.680903	4.80924	35.56	2.47312e-09	3.37594e-08
ENSG00000186638	KIF24	protein_coding	-0.679895	4.82868	35.5446	2.49271e-09	3.39876e-08
ENSG00000136717	BIN1	protein_coding	1.19999	2.26277	35.5343	2.506e-09	3.41294e-08
ENSG00000143228	NUF2	protein_coding	-0.545455	6.33214	35.4824	2.57368e-09	3.5011e-08
ENSG00000164830	OXR1	protein_coding	-0.600459	5.69201	35.3425	2.76528e-09	3.75742e-08
ENSG00000059728	MXD1	protein_coding	0.667179	4.93049	35.3367	2.77361e-09	3.76441e-08
ENSG00000104921	FCER2	protein_coding	0.627231	5.44731	35.2941	2.83484e-09	3.84311e-08
ENSG00000166619	BLCAP	protein_coding	0.580681	5.86395	35.2605	2.88421e-09	3.90556e-08
ENSG00000177409	SAMD9L	protein_coding	-0.658741	5.03452	35.2538	2.89416e-09	3.91455e-08
ENSG00000105339	DENND3	protein_coding	-0.501306	7.81763	35.1261	3.09032e-09	4.17511e-08
ENSG00000253368	TRNP1	protein_coding	-2.35043	-0.133474	35.0857	3.15505e-09	4.25769e-08
ENSG00000178202	POGLUT3	protein_coding	-0.632772	5.31644	35.0552	3.20485e-09	4.31997e-08
ENSG00000104613	INTS10	protein_coding	-0.516385	6.86027	35.0146	3.27239e-09	4.406e-08
ENSG00000040275	SPDL1	protein_coding	-0.592443	5.73753	34.9918	3.31098e-09	4.4529e-08
ENSG00000121067	SPOP	protein_coding	-0.510875	6.9767	34.8708	3.52324e-09	4.73298e-08
ENSG00000106089	STX1A	protein_coding	0.738861	4.29884	34.8601	3.54268e-09	4.7537e-08
ENSG00000101751	POLI	protein_coding	-0.677698	4.76665	34.8286	3.60045e-09	4.82575e-08
ENSG00000147416	ATP6V1B2	protein_coding	0.500837	8.62431	34.7774	3.69645e-09	4.94881e-08
ENSG00000153071	DAB2	protein_coding	0.647442	5.09522	34.6496	3.94716e-09	5.27849e-08
ENSG00000112561	TFEB	protein_coding	0.684356	4.68668	34.6323	3.98243e-09	5.31965e-08
ENSG00000165244	ZNF367	protein_coding	-0.693015	4.59095	34.6038	4.04107e-09	5.39189e-08
ENSG00000109685	NSD2	protein_coding	-0.495884	7.81121	34.3963	4.49583e-09	5.99191e-08
ENSG00000081320	STK17B	protein_coding	0.496539	7.42613	34.3873	4.51665e-09	6.01201e-08
ENSG00000103335	PIEZO1	protein_coding	-0.51032	6.90055	34.3854	4.52107e-09	6.01201e-08
ENSG00000112984	KIF20A	protein_coding	-0.552119	6.08478	34.3212	4.67256e-09	6.20648e-08
ENSG00000085840	ORC1	protein_coding	-0.556832	6.01075	34.2841	4.76252e-09	6.31888e-08
ENSG00000228474	OST4	protein_coding	0.518602	6.68323	34.2817	4.76833e-09	6.3195e-08
ENSG00000188906	LRRK2	protein_coding	0.624166	5.32506	34.2787	4.77587e-09	6.32241e-08
ENSG00000178719	GRINA	protein_coding	0.503076	7.1287	34.2642	4.81155e-09	6.36253e-08
ENSG00000244694	PTCHD4	protein_coding	1.97205	0.250577	34.2483	4.85107e-09	6.40764e-08
ENSG00000157399	ARSE	protein_coding	-2.55251	-0.387235	34.2371	4.87905e-09	6.43741e-08
ENSG00000170442	KRT86	protein_coding	1.71004	0.742892	34.1797	5.02508e-09	6.62241e-08
ENSG00000152582	SPEF2	protein_coding	-0.917737	3.28067	34.1776	5.03046e-09	6.62241e-08
ENSG00000162607	USP1	protein_coding	-0.497749	7.30845	34.1689	5.05291e-09	6.64458e-08
ENSG00000104783	KCNN4	protein_coding	0.495098	7.47527	34.1242	5.17031e-09	6.79141e-08
ENSG00000152766	ANKRD22	protein_coding	0.638094	5.14583	34.0933	5.25324e-09	6.8927e-08
ENSG00000149636	DSN1	protein_coding	-0.558724	5.97066	34.0561	5.35447e-09	7.01774e-08
ENSG00000138376	BARD1	protein_coding	-0.673621	4.72254	34.0201	5.45447e-09	7.14089e-08
ENSG00000162636	FAM102B	protein_coding	-0.563579	5.92024	34.0069	5.49166e-09	7.18069e-08
ENSG00000197903	HIST1H2BK	protein_coding	0.641442	5.10258	34.005	5.49701e-09	7.18069e-08
ENSG00000059377	TBXAS1	protein_coding	0.606963	5.53733	33.9897	5.5405e-09	7.22952e-08
ENSG00000184465	WDR27	protein_coding	-0.629328	5.23879	33.9701	5.59661e-09	7.2947e-08
ENSG00000166508	MCM7	protein_coding	-0.497391	8.83497	33.9552	5.63965e-09	7.34272e-08
ENSG00000105223	PLD3	protein_coding	0.615281	5.41236	33.9317	5.70798e-09	7.42351e-08
ENSG00000178921	PFAS	protein_coding	-0.507426	6.88512	33.9133	5.76236e-09	7.486e-08
ENSG00000180071	ANKRD18A	protein_coding	-0.983602	2.98516	33.9	5.80181e-09	7.52899e-08
ENSG00000122641	INHBA	protein_coding	-2.6092	-0.452076	33.8597	5.92317e-09	7.67806e-08
ENSG00000010610	CD4	protein_coding	0.491321	8.32792	33.8376	5.99093e-09	7.7574e-08
ENSG00000100479	POLE2	protein_coding	-0.689964	4.55776	33.8306	6.01264e-09	7.777e-08
ENSG00000132436	FIGNL1	protein_coding	-0.606208	5.51843	33.825	6.02982e-09	7.79071e-08
ENSG00000121933	TMIGD3	protein_coding	1.5697	1.05499	33.7931	6.12944e-09	7.91079e-08
ENSG00000070614	NDST1	protein_coding	0.497404	7.19724	33.7746	6.18807e-09	7.97775e-08
ENSG00000111344	RASAL1	protein_coding	1.34623	1.68416	33.7246	6.34914e-09	8.1765e-08
ENSG00000149503	INCENP	protein_coding	-0.533323	6.31002	33.7063	6.40922e-09	8.2449e-08
ENSG00000067225	PKM	protein_coding	0.515151	11.3459	33.6851	6.47966e-09	8.32647e-08
ENSG00000183696	UPP1	protein_coding	0.851176	3.56931	33.6748	6.51379e-09	8.36125e-08
ENSG00000178295	GEN1	protein_coding	-0.531729	6.31615	33.6304	6.6644e-09	8.54531e-08
ENSG00000147789	ZNF7	protein_coding	-0.661016	4.81617	33.534	7.00291e-09	8.96963e-08
ENSG00000023902	PLEKHO1	protein_coding	0.509458	6.7626	33.5128	7.07971e-09	9.05783e-08
ENSG00000136108	CKAP2	protein_coding	-0.506574	6.82492	33.5108	7.08708e-09	9.05783e-08
ENSG00000149243	KLHL35	protein_coding	-1.38025	1.62687	33.4965	7.1393e-09	9.11474e-08
ENSG00000163932	PRKCD	protein_coding	0.493211	8.83107	33.4227	7.41522e-09	9.45083e-08
ENSG00000065548	ZC3H15	protein_coding	-0.516899	6.56637	33.4219	7.41852e-09	9.45083e-08
ENSG00000026297	RNASET2	protein_coding	-0.550025	6.01837	33.3337	7.76247e-09	9.87836e-08
ENSG00000198721	ECI2	protein_coding	1.93733	0.275482	33.3202	7.81654e-09	9.93011e-08
ENSG00000114857	NKTR	protein_coding	-0.487902	7.78212	33.3194	7.81991e-09	9.93011e-08
ENSG00000197006	METTL9	protein_coding	0.498817	9.50035	33.3045	7.88015e-09	9.99588e-08
ENSG00000182568	SATB1	protein_coding	-0.487853	7.76299	33.3004	7.8968e-09	1.00063e-07
ENSG00000165424	ZCCHC24	protein_coding	0.855462	3.49878	33.2956	7.91622e-09	1.00202e-07
ENSG00000110042	DTX4	protein_coding	0.652711	4.86904	33.2855	7.9575e-09	1.00616e-07
ENSG00000115216	NRBP1	protein_coding	0.497568	7.03431	33.2664	8.03592e-09	1.015e-07
ENSG00000196787	HIST1H2AG	protein_coding	-1.40038	1.52888	33.2464	8.11907e-09	1.0244e-07
ENSG00000101017	CD40	protein_coding	1.2255	2.02834	33.2433	8.13213e-09	1.02496e-07
ENSG00000143110	C1orf162	protein_coding	0.503956	6.84087	33.2288	8.19302e-09	1.03154e-07
ENSG00000160791	CCR5	protein_coding	0.646625	4.93282	33.195	8.33654e-09	1.04849e-07
ENSG00000080709	KCNN2	protein_coding	-0.652308	4.87444	33.1904	8.35621e-09	1.04985e-07
ENSG00000168995	SIGLEC7	protein_coding	1.3446	1.68153	33.1724	8.43401e-09	1.0585e-07
ENSG00000276043	UHRF1	protein_coding	-0.539225	6.13353	33.1565	8.50322e-09	1.06606e-07
ENSG00000116127	ALMS1	protein_coding	-0.624342	5.20288	33.0985	8.7605e-09	1.09715e-07
ENSG00000115548	KDM3A	protein_coding	-0.510928	6.66197	33.0855	8.81954e-09	1.10337e-07
ENSG00000185760	KCNQ5	protein_coding	-0.649587	4.88712	33.0721	8.88057e-09	1.10984e-07
ENSG00000079459	FDFT1	protein_coding	-0.48761	8.54436	33.0672	8.90296e-09	1.11146e-07
ENSG00000140284	SLC27A2	protein_coding	-0.749325	4.0945	33.0555	8.95659e-09	1.11698e-07
ENSG00000132780	NASP	protein_coding	-0.485573	8.33652	33.0522	8.97161e-09	1.11767e-07
ENSG00000106683	LIMK1	protein_coding	0.54764	5.99789	33.022	9.11237e-09	1.13402e-07
ENSG00000196550	FAM72A	protein_coding	-0.635797	5.04627	33.0032	9.20083e-09	1.14325e-07
ENSG00000106948	AKNA	protein_coding	0.485827	7.7236	33.0021	9.20586e-09	1.14325e-07
ENSG00000133055	MYBPH	protein_coding	0.943515	3.09447	32.9734	9.34306e-09	1.15907e-07
ENSG00000125449	ARMC7	protein_coding	0.732707	4.20093	32.9369	9.51971e-09	1.17862e-07
ENSG00000102384	CENPI	protein_coding	-0.701454	4.405	32.9368	9.52055e-09	1.17862e-07
ENSG00000186529	CYP4F3	protein_coding	2.05414	0.0547632	32.8998	9.70349e-09	1.19943e-07
ENSG00000110880	CORO1C	protein_coding	0.493785	7.06509	32.8987	9.70897e-09	1.19943e-07
ENSG00000120137	PANK3	protein_coding	-0.496908	6.94113	32.8918	9.74319e-09	1.2024e-07
ENSG00000196072	BLOC1S2	protein_coding	0.532989	6.19134	32.8872	9.76651e-09	1.20403e-07
ENSG00000011201	ANOS1	protein_coding	-0.829576	3.61595	32.8828	9.78837e-09	1.20547e-07
ENSG00000100629	CEP128	protein_coding	-0.671691	4.62872	32.8655	9.87616e-09	1.21501e-07
ENSG00000085117	CD82	protein_coding	0.527393	6.29385	32.838	1.00167e-08	1.23102e-07
ENSG00000137504	CREBZF	protein_coding	-0.519608	6.41707	32.8305	1.00553e-08	1.23448e-07
ENSG00000276644	DACH1	protein_coding	-0.507717	6.66518	32.8089	1.01679e-08	1.24702e-07
ENSG00000079616	KIF22	protein_coding	-0.512624	6.56902	32.7988	1.02207e-08	1.25219e-07
ENSG00000163513	TGFBR2	protein_coding	0.564589	5.81063	32.7488	1.04872e-08	1.28352e-07
ENSG00000135451	TROAP	protein_coding	-0.525752	6.31426	32.7345	1.05645e-08	1.29116e-07
ENSG00000175305	CCNE2	protein_coding	-0.658276	4.75047	32.7332	1.05714e-08	1.29116e-07
ENSG00000156876	SASS6	protein_coding	-0.669051	4.63437	32.696	1.07759e-08	1.31477e-07
ENSG00000074706	IPCEF1	protein_coding	0.596907	5.49329	32.6723	1.09082e-08	1.32954e-07
ENSG00000076003	MCM6	protein_coding	-0.482584	8.25347	32.6536	1.10138e-08	1.34103e-07
ENSG00000205336	ADGRG1	protein_coding	1.98275	0.173201	32.632	1.11364e-08	1.35457e-07
ENSG00000186810	CXCR3	protein_coding	1.21967	2.0195	32.6	1.13216e-08	1.37568e-07
ENSG00000107796	ACTA2	protein_coding	0.836544	3.56192	32.5902	1.13787e-08	1.3812e-07
ENSG00000108175	ZMIZ1	protein_coding	0.482408	7.85518	32.588	1.13916e-08	1.38135e-07
ENSG00000167105	TMEM92	protein_coding	1.5214	1.12304	32.5625	1.15423e-08	1.39819e-07
ENSG00000136104	RNASEH2B	protein_coding	-0.487729	7.22295	32.555	1.15864e-08	1.4021e-07
ENSG00000142634	EFHD2	protein_coding	0.485389	7.31415	32.478	1.20548e-08	1.45729e-07
ENSG00000182557	SPNS3	protein_coding	-0.537975	6.08506	32.4757	1.20692e-08	1.45754e-07
ENSG00000198959	TGM2	protein_coding	1.45914	1.26771	32.4607	1.21627e-08	1.46734e-07
ENSG00000170855	TRIAP1	protein_coding	0.533602	6.11624	32.3861	1.26388e-08	1.52322e-07
ENSG00000155252	PI4K2A	protein_coding	0.67553	4.54711	32.3522	1.28609e-08	1.54841e-07
ENSG00000171827	ZNF570	protein_coding	-1.06441	2.56787	32.3181	1.30892e-08	1.57429e-07
ENSG00000137265	IRF4	protein_coding	2.04076	0.0755154	32.3087	1.31522e-08	1.58026e-07
ENSG00000080345	RIF1	protein_coding	-0.490614	6.99744	32.2688	1.34249e-08	1.6114e-07
ENSG00000129467	ADCY4	protein_coding	0.777619	3.86455	32.2184	1.37776e-08	1.65206e-07
ENSG00000147162	OGT	protein_coding	-0.479564	8.40122	32.1984	1.39205e-08	1.6675e-07
ENSG00000159164	SV2A	protein_coding	-2.07543	0.0803433	32.1864	1.40067e-08	1.67613e-07
ENSG00000186517	ARHGAP30	protein_coding	0.48704	9.15371	32.1274	1.44387e-08	1.72608e-07
ENSG00000152463	OLAH	protein_coding	0.969029	2.92564	32.1214	1.4483e-08	1.72963e-07
ENSG00000172493	AFF1	protein_coding	-0.477915	8.1294	32.0288	1.51905e-08	1.8123e-07
ENSG00000143578	CREB3L4	protein_coding	-0.722966	4.20032	32.0255	1.5216e-08	1.8135e-07
ENSG00000185480	PARPBP	protein_coding	-0.64186	4.85129	32.0201	1.52583e-08	1.81672e-07
ENSG00000198736	MSRB1	protein_coding	0.493583	6.8661	32.0062	1.53685e-08	1.828e-07
ENSG00000114450	GNB4	protein_coding	-0.510177	6.46469	31.9811	1.55684e-08	1.84992e-07
ENSG00000164674	SYTL3	protein_coding	1.22803	1.9464	31.9741	1.56243e-08	1.8547e-07
ENSG00000147872	PLIN2	protein_coding	0.524751	6.22238	31.9441	1.58677e-08	1.88028e-07
ENSG00000146278	PNRC1	protein_coding	-0.499753	6.69224	31.9436	1.58715e-08	1.88028e-07
ENSG00000171552	BCL2L1	protein_coding	0.656561	4.68564	31.9199	1.6066e-08	1.90141e-07
ENSG00000077097	TOP2B	protein_coding	-0.480713	8.73249	31.9089	1.61577e-08	1.91035e-07
ENSG00000123349	PFDN5	protein_coding	0.480626	8.72481	31.8964	1.62618e-08	1.92075e-07
ENSG00000129657	SEC14L1	protein_coding	0.504219	6.57795	31.8383	1.67555e-08	1.97709e-07
ENSG00000142227	EMP3	protein_coding	0.500043	6.6756	31.829	1.68357e-08	1.98457e-07
ENSG00000167173	C15orf39	protein_coding	0.49919	6.69569	31.8043	1.70516e-08	2.00802e-07
ENSG00000188647	PTAR1	protein_coding	-0.532718	6.04571	31.7782	1.72818e-08	2.03311e-07
ENSG00000119411	BSPRY	protein_coding	-0.827395	3.56131	31.7428	1.76003e-08	2.06852e-07
ENSG00000106665	CLIP2	protein_coding	0.700509	4.32326	31.7326	1.76924e-08	2.07727e-07
ENSG00000099308	MAST3	protein_coding	0.570462	5.68287	31.7172	1.78336e-08	2.09178e-07
ENSG00000140451	PIF1	protein_coding	-0.683402	4.44872	31.7083	1.79155e-08	2.0993e-07
ENSG00000255833	TIFAB	protein_coding	-0.572569	5.65903	31.6683	1.82887e-08	2.14091e-07
ENSG00000104290	FZD3	protein_coding	-0.619037	5.07456	31.5735	1.92029e-08	2.24571e-07
ENSG00000165233	CARD19	protein_coding	0.640565	4.82578	31.5548	1.93894e-08	2.26528e-07
ENSG00000144852	NR1I2	protein_coding	-1.4081	1.39118	31.5455	1.94819e-08	2.27385e-07
ENSG00000121621	KIF18A	protein_coding	-0.649158	4.71575	31.5368	1.95699e-08	2.28187e-07
ENSG00000151065	DCP1B	protein_coding	0.6489	4.71713	31.5252	1.96869e-08	2.29326e-07
ENSG00000066322	ELOVL1	protein_coding	0.528488	6.08992	31.5103	1.98386e-08	2.30672e-07
ENSG00000090776	EFNB1	protein_coding	0.748707	3.98444	31.51	1.98415e-08	2.30672e-07
ENSG00000169403	PTAFR	protein_coding	0.477248	7.34091	31.5063	1.98792e-08	2.30883e-07
ENSG00000177943	MAMDC4	protein_coding	-0.632458	4.91978	31.419	2.07933e-08	2.41263e-07
ENSG00000171105	INSR	protein_coding	-0.608739	5.19428	31.416	2.08257e-08	2.41403e-07
ENSG00000023287	RB1CC1	protein_coding	-0.511129	6.35748	31.3732	2.12903e-08	2.46547e-07
ENSG00000154978	VOPP1	protein_coding	0.549351	5.84334	31.349	2.15572e-08	2.49394e-07
ENSG00000083799	CYLD	protein_coding	0.510076	6.36491	31.3112	2.19803e-08	2.54039e-07
ENSG00000154229	PRKCA	protein_coding	0.50281	6.50581	31.3059	2.20407e-08	2.54489e-07
ENSG00000132485	ZRANB2	protein_coding	-0.488157	6.84957	31.2898	2.22249e-08	2.56366e-07
ENSG00000172819	RARG	protein_coding	0.919543	3.07035	31.2726	2.24225e-08	2.58393e-07
ENSG00000153044	CENPH	protein_coding	-0.630605	4.88973	31.2321	2.28954e-08	2.63587e-07
ENSG00000204186	ZDBF2	protein_coding	-1.41397	1.34519	31.2279	2.2944e-08	2.63889e-07
ENSG00000154734	ADAMTS1	protein_coding	-0.893525	3.19409	31.2153	2.30942e-08	2.65359e-07
ENSG00000267534	S1PR2	protein_coding	1.45087	1.18988	31.1698	2.3641e-08	2.71379e-07
ENSG00000107104	KANK1	protein_coding	-0.532229	5.9912	31.1228	2.4221e-08	2.77767e-07
ENSG00000042980	ADAM28	protein_coding	0.681822	4.39258	31.114	2.43306e-08	2.78753e-07
ENSG00000143674	MAP3K21	protein_coding	-0.51606	6.22945	31.0942	2.45809e-08	2.81349e-07
ENSG00000188042	ARL4C	protein_coding	0.69671	4.2838	31.0792	2.47709e-08	2.83249e-07
ENSG00000112029	FBXO5	protein_coding	-0.581957	5.49592	31.0411	2.52628e-08	2.88595e-07
ENSG00000155926	SLA	protein_coding	0.473306	7.35127	31.0281	2.54323e-08	2.90252e-07
ENSG00000198554	WDHD1	protein_coding	-0.557304	5.73818	31.0087	2.56878e-08	2.92885e-07
ENSG00000101412	E2F1	protein_coding	-0.572577	5.59967	30.9285	2.67717e-08	3.0495e-07
ENSG00000182287	AP1S2	protein_coding	0.484317	6.86958	30.9191	2.69016e-08	3.06135e-07
ENSG00000163781	TOPBP1	protein_coding	-0.470434	7.55701	30.9123	2.69953e-08	3.06906e-07
ENSG00000170191	NANP	protein_coding	-0.968535	2.858	30.8727	2.75517e-08	3.12931e-07
ENSG00000157404	KIT	protein_coding	-0.901579	3.13441	30.8346	2.80987e-08	3.18838e-07
ENSG00000175294	CATSPER1	protein_coding	0.851675	3.36255	30.7871	2.87943e-08	3.26418e-07
ENSG00000085382	HACE1	protein_coding	-0.593154	5.30812	30.7785	2.8923e-08	3.27564e-07
ENSG00000214029	ZNF891	protein_coding	-1.03931	2.55332	30.7606	2.91912e-08	3.30285e-07
ENSG00000142945	KIF2C	protein_coding	-0.490728	6.69114	30.723	2.97613e-08	3.36413e-07
ENSG00000206530	CFAP44	protein_coding	-0.658317	4.53054	30.5367	3.27609e-08	3.69967e-07
ENSG00000198754	OXCT2	protein_coding	-1.45801	1.17683	30.5248	3.29618e-08	3.71881e-07
ENSG00000165304	MELK	protein_coding	-0.543541	5.82692	30.5122	3.31766e-08	3.73947e-07
ENSG00000176225	RTTN	protein_coding	-0.665486	4.47513	30.4891	3.35752e-08	3.7808e-07
ENSG00000112053	SLC26A8	protein_coding	-0.727382	4.0491	30.4731	3.38526e-08	3.80841e-07
ENSG00000188343	FAM92A	protein_coding	-0.722104	4.06904	30.4704	3.39008e-08	3.81022e-07
ENSG00000196664	TLR7	protein_coding	0.910196	3.05627	30.4612	3.40604e-08	3.82211e-07
ENSG00000101773	RBBP8	protein_coding	-0.550094	5.76025	30.4606	3.40712e-08	3.82211e-07
ENSG00000188039	NWD1	protein_coding	1.1157	2.20837	30.4114	3.49475e-08	3.9167e-07
ENSG00000106462	EZH2	protein_coding	-0.492878	6.56971	30.3762	3.55861e-08	3.98443e-07
ENSG00000088325	TPX2	protein_coding	-0.466011	7.68869	30.3744	3.56191e-08	3.98443e-07
ENSG00000196636	SDHAF3	protein_coding	-0.73704	3.9705	30.3569	3.59418e-08	4.01673e-07
ENSG00000139737	SLAIN1	protein_coding	-0.637949	4.6954	30.3162	3.67043e-08	4.09807e-07
ENSG00000162645	GBP2	protein_coding	0.721259	4.07748	30.3123	3.67786e-08	4.10249e-07
ENSG00000137575	SDCBP	protein_coding	0.464698	7.96382	30.29	3.72032e-08	4.14595e-07
ENSG00000140876	NUDT7	protein_coding	-0.74938	3.89186	30.2623	3.77399e-08	4.2018e-07
ENSG00000180902	D2HGDH	protein_coding	-0.660134	4.49913	30.2556	3.78697e-08	4.2123e-07
ENSG00000143847	PPFIA4	protein_coding	-0.619903	4.9323	30.2372	3.82301e-08	4.24838e-07
ENSG00000129450	SIGLEC9	protein_coding	0.971128	2.8173	30.2213	3.85447e-08	4.27609e-07
ENSG00000008405	CRY1	protein_coding	-1.68604	0.623416	30.221	3.85516e-08	4.27609e-07
ENSG00000135334	AKIRIN2	protein_coding	0.486406	6.68656	30.2082	3.8806e-08	4.30027e-07
ENSG00000180573	HIST1H2AC	protein_coding	0.829977	3.41324	30.2035	3.89015e-08	4.30683e-07
ENSG00000158714	SLAMF8	protein_coding	1.35888	1.4075	30.1801	3.93723e-08	4.35487e-07
ENSG00000180611	MB21D2	protein_coding	1.02831	2.55492	30.1732	3.95122e-08	4.36626e-07
ENSG00000156639	ZFAND3	protein_coding	0.515853	6.10428	30.1711	3.95565e-08	4.36708e-07
ENSG00000178695	KCTD12	protein_coding	0.49858	6.39751	30.144	4.01131e-08	4.4244e-07
ENSG00000035862	TIMP2	protein_coding	0.507334	6.23635	30.0879	4.12904e-08	4.54992e-07
ENSG00000174371	EXO1	protein_coding	-0.497708	6.41698	30.0852	4.13473e-08	4.54992e-07
ENSG00000163590	PPM1L	protein_coding	-0.56029	5.63148	30.0843	4.13664e-08	4.54992e-07
ENSG00000072657	TRHDE	protein_coding	-0.609096	5.00847	30.0771	4.15213e-08	4.56272e-07
ENSG00000151503	NCAPD3	protein_coding	-0.467955	7.2546	30.0511	4.20814e-08	4.61997e-07
ENSG00000124145	SDC4	protein_coding	0.714229	4.08362	30.046	4.21925e-08	4.62788e-07
ENSG00000146858	ZC3HAV1L	protein_coding	-0.888123	3.13745	30.0383	4.2359e-08	4.64184e-07
ENSG00000163814	CDCP1	protein_coding	1.03507	2.51217	30.0312	4.2516e-08	4.65473e-07
ENSG00000213186	TRIM59	protein_coding	-0.579929	5.38466	30.0238	4.26783e-08	4.66819e-07
ENSG00000124313	IQSEC2	protein_coding	0.921486	2.98652	29.9827	4.35924e-08	4.76377e-07
ENSG00000139410	SDSL	protein_coding	0.933578	2.93975	29.9735	4.37981e-08	4.78183e-07
ENSG00000158825	CDA	protein_coding	0.587127	5.28931	29.9706	4.38651e-08	4.78473e-07
ENSG00000100055	CYTH4	protein_coding	0.462336	7.93442	29.9308	4.47734e-08	4.87779e-07
ENSG00000100427	MLC1	protein_coding	-0.462296	7.91017	29.9297	4.48007e-08	4.87779e-07
ENSG00000185432	METTL7A	protein_coding	0.553078	5.67904	29.9047	4.53812e-08	4.93646e-07
ENSG00000001084	GCLC	protein_coding	0.484803	6.64691	29.8521	4.66303e-08	5.06767e-07
ENSG00000196781	TLE1	protein_coding	-0.864505	3.23844	29.8449	4.68016e-08	5.08162e-07
ENSG00000111445	RFC5	protein_coding	-0.522074	5.97469	29.8311	4.71371e-08	5.11336e-07
ENSG00000171004	HS6ST2	protein_coding	-2.41099	-0.480407	29.8099	4.76548e-08	5.16479e-07
ENSG00000156127	BATF	protein_coding	0.618902	4.85857	29.7716	4.86063e-08	5.26309e-07
ENSG00000128422	KRT17	protein_coding	1.48938	1.00411	29.7535	4.90624e-08	5.30761e-07
ENSG00000166710	B2M	protein_coding	0.460632	8.37803	29.7361	4.95054e-08	5.35065e-07
ENSG00000103404	USP31	protein_coding	-0.52728	5.91327	29.6764	5.10513e-08	5.51271e-07
ENSG00000176393	RNPEP	protein_coding	0.460417	8.42902	29.6474	5.18231e-08	5.59094e-07
ENSG00000196678	ERI2	protein_coding	-0.594175	5.1434	29.6334	5.21979e-08	5.62625e-07
ENSG00000115828	QPCT	protein_coding	0.896808	3.04876	29.6217	5.2514e-08	5.65517e-07
ENSG00000107263	RAPGEF1	protein_coding	0.464932	7.2263	29.6088	5.28634e-08	5.68762e-07
ENSG00000133030	MPRIP	protein_coding	0.46502	7.21662	29.6048	5.2973e-08	5.69233e-07
ENSG00000073803	MAP3K13	protein_coding	-0.65477	4.47688	29.6037	5.30034e-08	5.69233e-07
ENSG00000188130	MAPK12	protein_coding	-0.566934	5.53172	29.5898	5.33844e-08	5.72806e-07
ENSG00000160326	SLC2A6	protein_coding	0.677175	4.32027	29.579	5.3682e-08	5.75477e-07
ENSG00000167978	SRRM2	protein_coding	-0.477362	10.5861	29.575	5.37951e-08	5.76168e-07
ENSG00000198707	CEP290	protein_coding	-0.682136	4.27205	29.5352	5.49104e-08	5.87581e-07
ENSG00000183762	KREMEN1	protein_coding	0.747456	3.82476	29.498	5.59733e-08	5.98414e-07
ENSG00000198315	ZKSCAN8	protein_coding	-0.477125	6.76607	29.4827	5.64188e-08	6.02632e-07
ENSG00000107957	SH3PXD2A	protein_coding	0.571283	5.43318	29.4763	5.66038e-08	6.04063e-07
ENSG00000172349	IL16	protein_coding	0.513879	6.03612	29.4555	5.7215e-08	6.10035e-07
ENSG00000182676	PPP1R27	protein_coding	-0.460288	8.52454	29.446	5.74979e-08	6.1214e-07
ENSG00000133639	BTG1	protein_coding	-0.469861	6.94543	29.4454	5.75158e-08	6.1214e-07
ENSG00000130270	ATP8B3	protein_coding	-0.588017	5.21719	29.4344	5.78427e-08	6.15066e-07
ENSG00000125885	MCM8	protein_coding	-0.618734	4.80968	29.4137	5.84629e-08	6.21103e-07
ENSG00000164252	AGGF1	protein_coding	-0.753054	3.79729	29.4013	5.88393e-08	6.2454e-07
ENSG00000178718	RPP25	protein_coding	-0.66511	4.39327	29.3983	5.89294e-08	6.24937e-07
ENSG00000103042	SLC38A7	protein_coding	0.604279	4.98741	29.3871	5.92712e-08	6.27999e-07
ENSG00000129810	SGO1	protein_coding	-0.679073	4.27798	29.3835	5.9382e-08	6.2861e-07
ENSG00000152684	PELO	protein_coding	0.595929	5.08948	29.3455	6.05565e-08	6.4047e-07
ENSG00000116871	MAP7D1	protein_coding	0.476606	6.76148	29.3398	6.07362e-08	6.41798e-07
ENSG00000177853	ZNF518A	protein_coding	-0.510164	6.05668	29.2321	6.42057e-08	6.77855e-07
ENSG00000105329	TGFB1	protein_coding	0.457079	7.78737	29.2115	6.48934e-08	6.84504e-07
ENSG00000180938	ZNF572	protein_coding	-2.27275	-0.347026	29.2012	6.52401e-08	6.87548e-07
ENSG00000136518	ACTL6A	protein_coding	-0.463691	7.14582	29.1938	6.54872e-08	6.89539e-07
ENSG00000113356	POLR3G	protein_coding	-0.809772	3.44984	29.1791	6.59874e-08	6.94188e-07
ENSG00000117411	B4GALT2	protein_coding	-0.595357	5.08089	29.1756	6.61077e-08	6.94835e-07
ENSG00000135926	TMBIM1	protein_coding	0.478254	6.67952	29.1544	6.68339e-08	7.01845e-07
ENSG00000124588	NQO2	protein_coding	0.609374	4.8848	29.1438	6.71998e-08	7.04453e-07
ENSG00000135605	TEC	protein_coding	-0.567265	5.44765	29.1438	6.72013e-08	7.04453e-07
ENSG00000101596	SMCHD1	protein_coding	-0.456811	7.43119	29.1148	6.82153e-08	7.1445e-07
ENSG00000101425	BPI	protein_coding	-0.678003	4.30026	29.112	6.8314e-08	7.1485e-07
ENSG00000138336	TET1	protein_coding	-1.00047	2.60185	29.0855	6.92541e-08	7.24048e-07
ENSG00000184937	WT1	protein_coding	-0.636001	4.58307	29.0296	7.12797e-08	7.44567e-07
ENSG00000160213	CSTB	protein_coding	0.455703	7.6689	29.0082	7.2072e-08	7.5218e-07
ENSG00000107719	PALD1	protein_coding	0.650549	4.46106	28.9846	7.29544e-08	7.60719e-07
ENSG00000149548	CCDC15	protein_coding	-0.911548	2.97369	28.9691	7.35439e-08	7.6619e-07
ENSG00000176076	KCNE5	protein_coding	-0.473256	6.77367	28.9632	7.37654e-08	7.6753e-07
ENSG00000108582	CPD	protein_coding	0.454191	8.15579	28.9623	7.38022e-08	7.6753e-07
ENSG00000090612	ZNF268	protein_coding	-0.657691	4.39672	28.9388	7.46997e-08	7.76181e-07
ENSG00000172731	LRRC20	protein_coding	-0.755729	3.75451	28.9171	7.55413e-08	7.84238e-07
ENSG00000127084	FGD3	protein_coding	0.484404	6.48277	28.9062	7.59705e-08	7.88002e-07
ENSG00000163131	CTSS	protein_coding	0.455141	7.4081	28.8664	7.75458e-08	8.03638e-07
ENSG00000128951	DUT	protein_coding	-0.453712	7.79882	28.8378	7.86995e-08	8.14881e-07
ENSG00000092853	CLSPN	protein_coding	-0.503896	6.10884	28.8322	7.89259e-08	8.16511e-07
ENSG00000168016	TRANK1	protein_coding	0.645517	4.47387	28.7879	8.07531e-08	8.34684e-07
ENSG00000122642	FKBP9	protein_coding	-0.711865	4.02204	28.7466	8.24957e-08	8.51952e-07
ENSG00000171659	GPR34	protein_coding	0.998791	2.55069	28.7364	8.29304e-08	8.55695e-07
ENSG00000112149	CD83	protein_coding	0.567654	5.3805	28.7164	8.37898e-08	8.63808e-07
ENSG00000161551	ZNF577	protein_coding	-1.11292	2.11292	28.6629	8.61365e-08	8.87229e-07
ENSG00000094804	CDC6	protein_coding	-0.502453	6.10611	28.6483	8.67892e-08	8.92638e-07
ENSG00000100298	APOBEC3H	protein_coding	0.872332	3.10742	28.6478	8.68126e-08	8.92638e-07
ENSG00000152784	PRDM8	protein_coding	-0.724252	3.90967	28.5871	8.95781e-08	9.20275e-07
ENSG00000173221	GLRX	protein_coding	0.493512	6.25241	28.5853	8.96585e-08	9.20302e-07
ENSG00000065989	PDE4A	protein_coding	0.814775	3.39853	28.5473	9.14352e-08	9.37725e-07
ENSG00000186073	C15orf41	protein_coding	-0.629978	4.58075	28.5375	9.19e-08	9.41677e-07
ENSG00000092470	WDR76	protein_coding	-0.539663	5.68441	28.5006	9.36686e-08	9.58969e-07
ENSG00000158406	HIST1H4H	protein_coding	1.13997	1.97279	28.4187	9.7716e-08	9.9954e-07
ENSG00000008277	ADAM22	protein_coding	-0.632743	4.54343	28.4091	9.82001e-08	1.00363e-06
ENSG00000163235	TGFA	protein_coding	1.34971	1.26459	28.3767	9.98615e-08	1.01973e-06
ENSG00000117676	RPS6KA1	protein_coding	0.454593	8.86624	28.3741	9.99924e-08	1.02018e-06
ENSG00000181444	ZNF467	protein_coding	0.701092	4.0548	28.3384	1.01854e-07	1.03828e-06
ENSG00000149269	PAK1	protein_coding	0.449415	8.0133	28.3265	1.02484e-07	1.0438e-06
ENSG00000095383	TBC1D2	protein_coding	0.753714	3.71455	28.3235	1.0264e-07	1.0445e-06
ENSG00000123975	CKS2	protein_coding	-0.483452	6.39227	28.2711	1.05457e-07	1.07224e-06
ENSG00000174238	PITPNA	protein_coding	0.462541	6.88423	28.2328	1.07566e-07	1.09274e-06
ENSG00000119943	PYROXD2	protein_coding	0.785842	3.51847	28.2303	1.07706e-07	1.09323e-06
ENSG00000103381	CPPED1	protein_coding	0.596152	4.92113	28.2252	1.0799e-07	1.09517e-06
ENSG00000114353	GNAI2	protein_coding	0.451034	8.64268	28.2053	1.09106e-07	1.10509e-06
ENSG00000078902	TOLLIP	protein_coding	0.522852	5.82562	28.2044	1.09155e-07	1.10509e-06
ENSG00000204271	SPIN3	protein_coding	-2.42791	-0.582597	28.1944	1.09722e-07	1.10988e-06
ENSG00000135476	ESPL1	protein_coding	-0.457975	7.04024	28.1822	1.10417e-07	1.11596e-06
ENSG00000166750	SLFN5	protein_coding	0.805305	3.39045	28.1778	1.10665e-07	1.11751e-06
ENSG00000169220	RGS14	protein_coding	0.523149	5.81846	28.1495	1.12297e-07	1.13302e-06
ENSG00000163864	NMNAT3	protein_coding	-0.649452	4.40036	28.1471	1.12435e-07	1.13315e-06
ENSG00000113552	GNPDA1	protein_coding	0.50015	6.0683	28.146	1.12501e-07	1.13315e-06
ENSG00000125089	SH3TC1	protein_coding	0.763952	3.63769	28.1392	1.12896e-07	1.13616e-06
ENSG00000118257	NRP2	protein_coding	1.57906	0.691271	28.1319	1.13324e-07	1.1395e-06
ENSG00000187688	TRPV2	protein_coding	0.508998	5.95494	28.1211	1.13958e-07	1.1449e-06
ENSG00000177238	TRIM72	protein_coding	0.684977	4.13196	28.0906	1.15769e-07	1.16211e-06
ENSG00000156787	TBC1D31	protein_coding	-0.640819	4.4527	28.0866	1.16007e-07	1.16351e-06
ENSG00000100234	TIMP3	protein_coding	1.90493	0.343748	28.0835	1.16191e-07	1.16437e-06
ENSG00000089041	P2RX7	protein_coding	-0.649098	4.39627	28.0777	1.16543e-07	1.16691e-06
ENSG00000115687	PASK	protein_coding	-0.532541	5.71699	28.0621	1.17486e-07	1.17536e-06
ENSG00000165480	SKA3	protein_coding	-0.507161	5.95944	27.9809	1.22517e-07	1.22466e-06
ENSG00000076554	TPD52	protein_coding	-1.94532	-0.0162561	27.9778	1.22712e-07	1.22557e-06
ENSG00000196739	COL27A1	protein_coding	-0.569908	5.25172	27.9638	1.23604e-07	1.23343e-06
ENSG00000133119	RFC3	protein_coding	-0.530048	5.72239	27.9277	1.25934e-07	1.25562e-06
ENSG00000196126	HLA-DRB1	protein_coding	0.631533	4.51164	27.9069	1.27296e-07	1.26814e-06
ENSG00000196639	HRH1	protein_coding	0.765641	3.58629	27.8536	1.30848e-07	1.30243e-06
ENSG00000101752	MIB1	protein_coding	-0.491693	6.16612	27.8501	1.31085e-07	1.30369e-06
ENSG00000136026	CKAP4	protein_coding	0.44531	8.28686	27.8324	1.3229e-07	1.31457e-06
ENSG00000173207	CKS1B	protein_coding	-0.56345	5.32314	27.8231	1.32928e-07	1.3198e-06
ENSG00000116133	DHCR24	protein_coding	-0.445384	8.06247	27.7956	1.34835e-07	1.33762e-06
ENSG00000101336	HCK	protein_coding	0.445264	7.92128	27.7863	1.35485e-07	1.34293e-06
ENSG00000122952	ZWINT	protein_coding	-0.445925	7.5917	27.7821	1.35777e-07	1.3447e-06
ENSG00000242372	EIF6	protein_coding	0.461574	6.81352	27.7729	1.36422e-07	1.34996e-06
ENSG00000141506	PIK3R5	protein_coding	0.452858	7.10656	27.7674	1.36809e-07	1.35267e-06
ENSG00000103313	MEFV	protein_coding	0.549807	5.50219	27.7419	1.38629e-07	1.36951e-06
ENSG00000000938	FGR	protein_coding	0.444852	8.37544	27.7345	1.39156e-07	1.37357e-06
ENSG00000100526	CDKN3	protein_coding	-0.581237	5.05794	27.6872	1.426e-07	1.40639e-06
ENSG00000178999	AURKB	protein_coding	-0.490412	6.17361	27.6756	1.43461e-07	1.4137e-06
ENSG00000132357	CARD6	protein_coding	0.587795	4.95457	27.662	1.4447e-07	1.42246e-06
ENSG00000061656	SPAG4	protein_coding	-1.77033	0.278977	27.6578	1.44789e-07	1.42442e-06
ENSG00000187735	TCEA1	protein_coding	-0.478113	6.38729	27.6502	1.45356e-07	1.42848e-06
ENSG00000144401	METTL21A	protein_coding	-0.56045	5.32813	27.6491	1.45443e-07	1.42848e-06
ENSG00000121742	GJB6	protein_coding	2.02653	-0.196859	27.625	1.4726e-07	1.44512e-06
ENSG00000197461	PDGFA	protein_coding	1.40514	1.06261	27.6157	1.47969e-07	1.45088e-06
ENSG00000080822	CLDND1	protein_coding	0.49202	6.11782	27.6057	1.48743e-07	1.45726e-06
ENSG00000114120	SLC25A36	protein_coding	-0.507644	5.90994	27.5547	1.52716e-07	1.49495e-06
ENSG00000130147	SH3BP4	protein_coding	0.869023	3.04268	27.5497	1.53107e-07	1.49754e-06
ENSG00000102780	DGKH	protein_coding	-0.592153	4.88185	27.5421	1.53713e-07	1.50193e-06
ENSG00000163655	GMPS	protein_coding	-0.443024	8.20767	27.5409	1.5381e-07	1.50193e-06
ENSG00000115155	OTOF	protein_coding	-0.590698	4.96952	27.5026	1.56881e-07	1.53066e-06
ENSG00000166037	CEP57	protein_coding	-0.465864	6.61462	27.411	1.64494e-07	1.60361e-06
ENSG00000160255	ITGB2	protein_coding	0.454274	9.81866	27.4042	1.65074e-07	1.60667e-06
ENSG00000089335	ZNF302	protein_coding	-0.85262	3.10646	27.4041	1.65079e-07	1.60667e-06
ENSG00000119326	CTNNAL1	protein_coding	-0.646139	4.34928	27.387	1.66544e-07	1.61959e-06
ENSG00000204161	TMEM273	protein_coding	0.884747	2.96076	27.3762	1.67484e-07	1.6274e-06
ENSG00000132386	SERPINF1	protein_coding	0.500588	5.97106	27.357	1.6915e-07	1.64224e-06
ENSG00000108179	PPIF	protein_coding	0.444495	8.68644	27.3381	1.70815e-07	1.65704e-06
ENSG00000100097	LGALS1	protein_coding	0.446532	8.90323	27.3281	1.71702e-07	1.66429e-06
ENSG00000139644	TMBIM6	protein_coding	0.456968	10.4102	27.2588	1.77964e-07	1.72357e-06
ENSG00000168297	PXK	protein_coding	-0.441247	7.75606	27.2557	1.78246e-07	1.72489e-06
ENSG00000183621	ZNF438	protein_coding	-0.549724	5.44203	27.2428	1.7944e-07	1.73503e-06
ENSG00000101003	GINS1	protein_coding	-0.544796	5.49592	27.2233	1.81258e-07	1.74975e-06
ENSG00000188785	ZNF548	protein_coding	-0.562848	5.23435	27.2233	1.81258e-07	1.74975e-06
ENSG00000115020	PIKFYVE	protein_coding	-0.443582	7.31082	27.1862	1.84777e-07	1.78226e-06
ENSG00000183137	CEP57L1	protein_coding	-0.601948	4.71276	27.1838	1.85007e-07	1.78303e-06
ENSG00000221923	ZNF880	protein_coding	-2.22738	-0.433763	27.1742	1.85923e-07	1.79039e-06
ENSG00000213699	SLC35F6	protein_coding	0.628966	4.46266	27.1551	1.87769e-07	1.80671e-06
ENSG00000103005	USB1	protein_coding	0.461794	6.67065	27.1529	1.87988e-07	1.80734e-06
ENSG00000143622	RIT1	protein_coding	0.56686	5.16052	27.1404	1.89202e-07	1.81754e-06
ENSG00000101255	TRIB3	protein_coding	-0.465974	6.5957	27.1383	1.89409e-07	1.81805e-06
ENSG00000127533	F2RL3	protein_coding	1.74184	0.226386	27.1032	1.92874e-07	1.84981e-06
ENSG00000140545	MFGE8	protein_coding	1.15115	1.85299	27.0607	1.97166e-07	1.88944e-06
ENSG00000127337	YEATS4	protein_coding	-0.496988	5.97341	27.0487	1.98392e-07	1.89965e-06
ENSG00000135269	TES	protein_coding	0.534445	5.59184	27.0384	1.99455e-07	1.90829e-06
ENSG00000105948	TTC26	protein_coding	-0.667502	4.15456	27.0176	2.01608e-07	1.92732e-06
ENSG00000122694	GLIPR2	protein_coding	0.512373	5.80787	26.9604	2.07665e-07	1.98363e-06
ENSG00000164306	PRIMPOL	protein_coding	-0.705113	3.88831	26.9459	2.09232e-07	1.99699e-06
ENSG00000185697	MYBL1	protein_coding	-0.951063	2.6459	26.9369	2.1021e-07	2.0047e-06
ENSG00000071054	MAP4K4	protein_coding	0.438055	8.14543	26.9327	2.10659e-07	2.00737e-06
ENSG00000162194	LBHD1	protein_coding	-0.639445	4.3625	26.9124	2.12893e-07	2.02702e-06
ENSG00000214212	C19orf38	protein_coding	0.508698	5.84874	26.8989	2.14383e-07	2.03956e-06
ENSG00000100578	KIAA0586	protein_coding	-0.56085	5.21173	26.8686	2.17769e-07	2.07012e-06
ENSG00000025708	TYMP	protein_coding	0.525886	5.67202	26.8654	2.18133e-07	2.07192e-06
ENSG00000149115	TNKS1BP1	protein_coding	0.680756	4.04672	26.8637	2.18326e-07	2.07208e-06
ENSG00000129255	MPDU1	protein_coding	0.488482	6.06568	26.8308	2.22068e-07	2.10591e-06
ENSG00000156162	DPY19L4	protein_coding	-0.587053	4.8472	26.8277	2.22421e-07	2.10757e-06
ENSG00000101546	RBFA	protein_coding	-0.605388	4.64925	26.8187	2.2347e-07	2.11582e-06
ENSG00000124507	PACSIN1	protein_coding	2.10165	-0.354208	26.7683	2.29368e-07	2.16992e-06
ENSG00000164047	CAMP	protein_coding	1.3349	1.20028	26.7649	2.29769e-07	2.17198e-06
ENSG00000103066	PLA2G15	protein_coding	0.585651	4.86107	26.7558	2.30853e-07	2.18048e-06
ENSG00000158402	CDC25C	protein_coding	-0.676976	4.0774	26.7486	2.31715e-07	2.18688e-06
ENSG00000092841	MYL6	protein_coding	0.446419	9.43592	26.744	2.32277e-07	2.19044e-06
ENSG00000126759	CFP	protein_coding	1.05366	2.16879	26.729	2.34082e-07	2.2057e-06
ENSG00000176871	WSB2	protein_coding	0.526256	5.64223	26.7093	2.36479e-07	2.22652e-06
ENSG00000178752	ERFE	protein_coding	-0.83529	3.155	26.7006	2.37546e-07	2.23478e-06
ENSG00000221829	FANCG	protein_coding	-0.485642	6.1039	26.6942	2.38334e-07	2.24041e-06
ENSG00000167083	GNGT2	protein_coding	0.821854	3.19523	26.6697	2.41374e-07	2.26719e-06
ENSG00000123552	USP45	protein_coding	-0.594368	4.72884	26.6266	2.46818e-07	2.31649e-06
ENSG00000163714	U2SURP	protein_coding	-0.435871	7.73958	26.6156	2.48229e-07	2.32788e-06
ENSG00000167778	SPRYD3	protein_coding	0.50738	5.82828	26.6077	2.49252e-07	2.33563e-06
ENSG00000013375	PGM3	protein_coding	-0.552426	5.28633	26.5898	2.51575e-07	2.35488e-06
ENSG00000188522	FAM83G	protein_coding	0.601757	4.65153	26.5888	2.51705e-07	2.35488e-06
ENSG00000235568	NFAM1	protein_coding	0.439514	7.26998	26.5682	2.54399e-07	2.37821e-06
ENSG00000188215	DCUN1D3	protein_coding	0.63332	4.36461	26.5626	2.55139e-07	2.38325e-06
ENSG00000170873	MTSS1	protein_coding	-1.07026	2.1084	26.5487	2.56979e-07	2.39854e-06
ENSG00000197081	IGF2R	protein_coding	0.437087	8.5865	26.5335	2.59007e-07	2.41557e-06
ENSG00000006327	TNFRSF12A	protein_coding	1.07249	2.08171	26.4899	2.64924e-07	2.4688e-06
ENSG00000100949	RABGGTA	protein_coding	0.513039	5.76091	26.4734	2.67198e-07	2.48803e-06
ENSG00000174718	RESF1	protein_coding	0.43591	8.55357	26.465	2.6835e-07	2.4968e-06
ENSG00000134243	SORT1	protein_coding	0.519015	5.68985	26.4571	2.69463e-07	2.50253e-06
ENSG00000198133	TMEM229B	protein_coding	0.611375	4.5418	26.4564	2.6956e-07	2.50253e-06
ENSG00000242550	SERPINB10	protein_coding	-0.695266	3.91453	26.4561	2.69601e-07	2.50253e-06
ENSG00000261371	PECAM1	protein_coding	0.435852	8.56473	26.4378	2.72167e-07	2.52437e-06
ENSG00000162676	GFI1	protein_coding	-0.434406	7.72183	26.42	2.74675e-07	2.54564e-06
ENSG00000164754	RAD21	protein_coding	-0.435955	8.60246	26.4136	2.75588e-07	2.5521e-06
ENSG00000166436	TRIM66	protein_coding	-0.625223	4.429	26.3952	2.78235e-07	2.57387e-06
ENSG00000128050	PAICS	protein_coding	-0.436009	8.62251	26.3942	2.78374e-07	2.57387e-06
ENSG00000167977	KCTD5	protein_coding	0.539321	5.45133	26.3806	2.80348e-07	2.5896e-06
ENSG00000116741	RGS2	protein_coding	0.78614	3.35561	26.3794	2.80513e-07	2.5896e-06
ENSG00000104231	ZFAND1	protein_coding	-0.528695	5.58387	26.3414	2.86083e-07	2.63897e-06
ENSG00000215784	FAM72D	protein_coding	-0.78112	3.39046	26.299	2.92438e-07	2.69548e-06
ENSG00000068489	PRR11	protein_coding	-0.493535	5.9355	26.2708	2.96745e-07	2.73305e-06
ENSG00000205592	MUC19	protein_coding	-0.819657	3.18766	26.2494	3.00041e-07	2.76126e-06
ENSG00000101911	PRPS2	protein_coding	-0.472212	6.26025	26.2357	3.02186e-07	2.77885e-06
ENSG00000117054	ACADM	protein_coding	-0.452779	6.68952	26.2098	3.06256e-07	2.81409e-06
ENSG00000175322	ZNF519	protein_coding	-0.739888	3.60856	26.1548	3.15121e-07	2.89329e-06
ENSG00000101439	CST3	protein_coding	0.433025	7.59576	26.1519	3.15583e-07	2.89529e-06
ENSG00000163393	SLC22A15	protein_coding	-0.446807	6.82449	26.1116	3.22234e-07	2.95402e-06
ENSG00000181544	FANCB	protein_coding	-0.746624	3.55712	26.1037	3.23557e-07	2.96385e-06
ENSG00000153179	RASSF3	protein_coding	0.500172	5.84214	26.0851	3.2669e-07	2.99024e-06
ENSG00000026559	KCNG1	protein_coding	-1.79386	0.0998264	26.0692	3.29401e-07	3.01272e-06
ENSG00000083123	BCKDHB	protein_coding	-0.60783	4.53076	26.0643	3.30232e-07	3.01799e-06
ENSG00000157193	LRP8	protein_coding	-0.446406	6.81281	26.0068	3.40218e-07	3.10685e-06
ENSG00000197632	SERPINB2	protein_coding	0.630212	4.32991	26.0027	3.40942e-07	3.11106e-06
ENSG00000140332	TLE3	protein_coding	0.471077	6.24398	26.0001	3.41396e-07	3.11281e-06
ENSG00000130528	HRC	protein_coding	-0.820351	3.1924	25.9983	3.41727e-07	3.11342e-06
ENSG00000152104	PTPN14	protein_coding	0.973431	2.43056	25.9575	3.49014e-07	3.17737e-06
ENSG00000103196	CRISPLD2	protein_coding	1.01653	2.2424	25.9455	3.51192e-07	3.19474e-06
ENSG00000126247	CAPNS1	protein_coding	0.432331	8.63263	25.9298	3.54061e-07	3.21837e-06
ENSG00000139880	CDH24	protein_coding	-0.8815	2.89121	25.9239	3.55146e-07	3.22428e-06
ENSG00000112159	MDN1	protein_coding	-0.430341	7.72659	25.9233	3.55257e-07	3.22428e-06
ENSG00000137460	FHDC1	protein_coding	0.798993	3.24455	25.8942	3.60653e-07	3.27075e-06
ENSG00000254827	SLC22A18AS	protein_coding	2.04386	-0.32641	25.8727	3.64692e-07	3.30485e-06
ENSG00000196576	PLXNB2	protein_coding	0.430658	8.49645	25.8635	3.66427e-07	3.31779e-06
ENSG00000162894	FCMR	protein_coding	0.514952	5.6786	25.8622	3.66681e-07	3.31779e-06
ENSG00000032444	PNPLA6	protein_coding	0.480874	6.05103	25.8322	3.72421e-07	3.36715e-06
ENSG00000120526	NUDCD1	protein_coding	-0.51466	5.67393	25.8273	3.73371e-07	3.37226e-06
ENSG00000132170	PPARG	protein_coding	0.990667	2.34604	25.8263	3.73556e-07	3.37226e-06
ENSG00000198093	ZNF649	protein_coding	-1.18987	1.64337	25.8069	3.7734e-07	3.40383e-06
ENSG00000128731	HERC2	protein_coding	-0.574965	4.86379	25.8006	3.78568e-07	3.41231e-06
ENSG00000263264	AC119396.1	protein_coding	-0.962717	2.50078	25.7684	3.84934e-07	3.46704e-06
ENSG00000042753	AP2S1	protein_coding	0.433547	7.22579	25.7575	3.87111e-07	3.484e-06
ENSG00000179630	LACC1	protein_coding	0.656995	4.10176	25.752	3.88233e-07	3.49144e-06
ENSG00000067048	DDX3Y	protein_coding	-0.432899	7.24405	25.7446	3.89714e-07	3.5021e-06
ENSG00000165300	SLITRK5	protein_coding	-0.630747	4.31328	25.7369	3.9127e-07	3.51341e-06
ENSG00000123395	ATG101	protein_coding	0.647231	4.19098	25.7205	3.94617e-07	3.54078e-06
ENSG00000114021	NIT2	protein_coding	-0.458536	6.44228	25.6908	4.00743e-07	3.59302e-06
ENSG00000164054	SHISA5	protein_coding	0.429062	7.44697	25.6688	4.05338e-07	3.63147e-06
ENSG00000128335	APOL2	protein_coding	0.572012	4.88512	25.6626	4.0664e-07	3.64038e-06
ENSG00000051180	RAD51	protein_coding	-0.552658	5.15151	25.6582	4.07558e-07	3.64584e-06
ENSG00000171316	CHD7	protein_coding	-0.468074	6.23965	25.6284	4.13895e-07	3.69973e-06
ENSG00000198915	RASGEF1A	protein_coding	1.15698	1.76114	25.6097	4.17939e-07	3.73306e-06
ENSG00000137135	ARHGEF39	protein_coding	-0.510102	5.70084	25.5849	4.2333e-07	3.77836e-06
ENSG00000084676	NCOA1	protein_coding	0.589104	4.64432	25.5829	4.23785e-07	3.77958e-06
ENSG00000139318	DUSP6	protein_coding	0.427493	7.58288	25.5722	4.26145e-07	3.79776e-06
ENSG00000197016	ZNF470	protein_coding	-1.03657	2.15675	25.5673	4.27226e-07	3.80453e-06
ENSG00000110925	CSRNP2	protein_coding	0.53102	5.44271	25.5653	4.27653e-07	3.80546e-06
ENSG00000109184	DCUN1D4	protein_coding	-0.55166	5.13871	25.5541	4.30161e-07	3.82491e-06
ENSG00000164118	CEP44	protein_coding	-0.569384	4.8845	25.4988	4.42669e-07	3.93318e-06
ENSG00000088298	EDEM2	protein_coding	0.442033	6.81212	25.4963	4.43232e-07	3.93523e-06
ENSG00000115866	DARS	protein_coding	-0.437962	6.91931	25.4832	4.46244e-07	3.95899e-06
ENSG00000075826	SEC31B	protein_coding	-0.498193	5.81061	25.4762	4.47869e-07	3.97043e-06
ENSG00000162896	PIGR	protein_coding	1.03383	2.1523	25.4182	4.61533e-07	4.0885e-06
ENSG00000134256	CD101	protein_coding	0.664975	4.02996	25.3657	4.74268e-07	4.19818e-06
ENSG00000142657	PGD	protein_coding	0.429949	8.92865	25.319	4.85887e-07	4.29781e-06
ENSG00000176055	MBLAC2	protein_coding	-0.869546	2.87354	25.3021	4.90172e-07	4.33248e-06
ENSG00000203760	CENPW	protein_coding	-0.459085	6.35735	25.2914	4.92906e-07	4.35339e-06
ENSG00000138346	DNA2	protein_coding	-0.545407	5.18421	25.2742	4.97329e-07	4.38918e-06
ENSG00000138119	MYOF	protein_coding	0.543538	5.21029	25.2693	4.98573e-07	4.39688e-06
ENSG00000168906	MAT2A	protein_coding	-0.431553	9.15215	25.2554	5.02183e-07	4.42542e-06
ENSG00000077152	UBE2T	protein_coding	-0.449005	6.56595	25.2478	5.0418e-07	4.43774e-06
ENSG00000141384	TAF4B	protein_coding	-0.60388	4.47869	25.2472	5.04331e-07	4.43774e-06
ENSG00000034152	MAP2K3	protein_coding	0.469659	6.14157	25.2429	5.05457e-07	4.44434e-06
ENSG00000011009	LYPLA2	protein_coding	0.514206	5.62054	25.204	5.15756e-07	4.53153e-06
ENSG00000163874	ZC3H12A	protein_coding	0.68483	3.8829	25.2025	5.16141e-07	4.53155e-06
ENSG00000106991	ENG	protein_coding	0.451814	6.49288	25.1975	5.17504e-07	4.54015e-06
ENSG00000127951	FGL2	protein_coding	0.424432	7.4814	25.176	5.23299e-07	4.58721e-06
ENSG00000175548	ALG10B	protein_coding	-0.706581	3.72262	25.1747	5.23643e-07	4.58721e-06
ENSG00000183814	LIN9	protein_coding	-0.551946	5.08653	25.1719	5.24399e-07	4.59043e-06
ENSG00000157216	SSBP3	protein_coding	0.512409	5.62746	25.1473	5.31151e-07	4.6461e-06
ENSG00000049883	PTCD2	protein_coding	-0.57168	4.80397	25.1317	5.35459e-07	4.68032e-06
ENSG00000107863	ARHGAP21	protein_coding	-0.807939	3.14582	25.1247	5.37413e-07	4.69393e-06
ENSG00000100219	XBP1	protein_coding	-0.423268	7.78103	25.0983	5.44802e-07	4.75496e-06
ENSG00000160285	LSS	protein_coding	-0.910754	2.70611	25.0674	5.53601e-07	4.8282e-06
ENSG00000165006	UBAP1	protein_coding	0.450225	6.49252	25.056	5.56887e-07	4.85328e-06
ENSG00000134287	ARF3	protein_coding	0.430664	9.2614	25.0317	5.63946e-07	4.91118e-06
ENSG00000111961	SASH1	protein_coding	0.436027	6.85619	25.0149	5.68884e-07	4.95054e-06
ENSG00000070950	RAD18	protein_coding	-0.534053	5.30832	24.9953	5.74709e-07	4.99756e-06
ENSG00000189042	ZNF567	protein_coding	-0.854882	2.9258	24.9878	5.76949e-07	5.01315e-06
ENSG00000186591	UBE2H	protein_coding	0.43022	7.05681	24.9864	5.77348e-07	5.01315e-06
ENSG00000198853	RUSC2	protein_coding	0.525683	5.44358	24.9788	5.79631e-07	5.02927e-06
ENSG00000071794	HLTF	protein_coding	-0.522425	5.47896	24.9652	5.83732e-07	5.06115e-06
ENSG00000169255	B3GALNT1	protein_coding	-0.834434	3.00059	24.9466	5.89418e-07	5.10671e-06
ENSG00000139278	GLIPR1	protein_coding	0.547313	5.1073	24.9351	5.92926e-07	5.13334e-06
ENSG00000104218	CSPP1	protein_coding	-0.54985	5.07037	24.9016	6.03318e-07	5.21949e-06
ENSG00000138413	IDH1	protein_coding	-0.430108	7.02615	24.8972	6.04689e-07	5.22753e-06
ENSG00000005436	GCFC2	protein_coding	-0.572885	4.74922	24.884	6.0885e-07	5.25966e-06
ENSG00000047932	GOPC	protein_coding	-0.450003	6.45422	24.8649	6.14916e-07	5.30819e-06
ENSG00000181929	PRKAG1	protein_coding	0.44541	6.56963	24.8619	6.15862e-07	5.31249e-06
ENSG00000035928	RFC1	protein_coding	-0.437418	6.78231	24.8594	6.1667e-07	5.31558e-06
ENSG00000135047	CTSL	protein_coding	0.546805	5.10915	24.8562	6.17691e-07	5.32051e-06
ENSG00000183856	IQGAP3	protein_coding	-0.44711	6.5365	24.8527	6.18809e-07	5.32626e-06
ENSG00000149554	CHEK1	protein_coding	-0.486174	5.86593	24.8388	6.23294e-07	5.36096e-06
ENSG00000188529	SRSF10	protein_coding	-0.42062	7.98413	24.8357	6.24299e-07	5.36571e-06
ENSG00000102760	RGCC	protein_coding	-0.799035	3.18553	24.8341	6.24811e-07	5.36621e-06
ENSG00000112701	SENP6	protein_coding	-0.445789	6.54889	24.825	6.27765e-07	5.38767e-06
ENSG00000109062	SLC9A3R1	protein_coding	0.440656	6.69166	24.8189	6.29783e-07	5.40108e-06
ENSG00000181631	P2RY13	protein_coding	0.92131	2.60006	24.8149	6.31082e-07	5.40829e-06
ENSG00000008710	PKD1	protein_coding	-0.543447	5.15392	24.7574	6.50173e-07	5.56787e-06
ENSG00000124813	RUNX2	protein_coding	-0.427077	7.10489	24.732	6.58819e-07	5.63783e-06
ENSG00000119950	MXI1	protein_coding	-0.475811	5.96566	24.7092	6.66669e-07	5.70089e-06
ENSG00000085999	RAD54L	protein_coding	-0.537798	5.21424	24.6936	6.72066e-07	5.74289e-06
ENSG00000185813	PCYT2	protein_coding	-0.596172	4.51408	24.6889	6.73701e-07	5.75146e-06
ENSG00000120992	LYPLA1	protein_coding	-0.441615	6.62916	24.688	6.74041e-07	5.75146e-06
ENSG00000116514	RNF19B	protein_coding	0.541955	5.14262	24.6764	6.78089e-07	5.78183e-06
ENSG00000144677	CTDSPL	protein_coding	-1.09462	1.881	24.6706	6.80128e-07	5.79504e-06
ENSG00000058453	CROCC	protein_coding	-0.899149	2.74523	24.6546	6.85817e-07	5.83931e-06
ENSG00000110852	CLEC2B	protein_coding	0.4798	5.91241	24.6444	6.8945e-07	5.86603e-06
ENSG00000197852	INKA2	protein_coding	0.651121	4.05057	24.6413	6.90555e-07	5.87121e-06
ENSG00000197982	C1orf122	protein_coding	0.607703	4.39038	24.633	6.93552e-07	5.89245e-06
ENSG00000117410	ATP6V0B	protein_coding	0.418936	8.18175	24.6304	6.9447e-07	5.89602e-06
ENSG00000152556	PFKM	protein_coding	0.692947	3.76838	24.6209	6.97905e-07	5.92094e-06
ENSG00000167470	MIDN	protein_coding	0.511359	5.57871	24.6164	6.99543e-07	5.93058e-06
ENSG00000116990	MYCL	protein_coding	0.897035	2.69656	24.6131	7.0075e-07	5.93656e-06
ENSG00000179344	HLA-DQB1	protein_coding	0.878428	2.79071	24.6115	7.01334e-07	5.93726e-06
ENSG00000215883	CYB5RL	protein_coding	-0.59185	4.51431	24.5554	7.2202e-07	6.10801e-06
ENSG00000164076	CAMKV	protein_coding	-1.87523	-0.132755	24.5467	7.25303e-07	6.1314e-06
ENSG00000144909	OSBPL11	protein_coding	0.566211	4.76959	24.4749	7.52845e-07	6.35969e-06
ENSG00000163872	YEATS2	protein_coding	-0.427073	7.01051	24.4674	7.55775e-07	6.37988e-06
ENSG00000153531	ADPRHL1	protein_coding	1.11815	1.76144	24.448	7.63432e-07	6.43993e-06
ENSG00000111667	USP5	protein_coding	0.427215	6.98354	24.4217	7.73936e-07	6.52278e-06
ENSG00000163191	S100A11	protein_coding	0.418171	8.46399	24.4206	7.74356e-07	6.52278e-06
ENSG00000172613	RAD9A	protein_coding	-0.555539	4.92747	24.4175	7.75609e-07	6.52868e-06
ENSG00000142512	SIGLEC10	protein_coding	0.565111	4.79535	24.4021	7.81851e-07	6.57655e-06
ENSG00000158477	CD1A	protein_coding	1.75773	0.0056613	24.3889	7.8722e-07	6.61701e-06
ENSG00000135596	MICAL1	protein_coding	-0.427731	9.68393	24.3863	7.8828e-07	6.62122e-06
ENSG00000136273	HUS1	protein_coding	0.527571	5.29842	24.381	7.90447e-07	6.63471e-06
ENSG00000158481	CD1C	protein_coding	1.8135	-0.113179	24.3496	8.03447e-07	6.73905e-06
ENSG00000162062	TEDC2	protein_coding	-0.767568	3.30034	24.3356	8.09312e-07	6.78343e-06
ENSG00000186812	ZNF397	protein_coding	-0.479143	5.88713	24.334	8.09963e-07	6.78409e-06
ENSG00000107672	NSMCE4A	protein_coding	-0.513666	5.51744	24.2922	8.27736e-07	6.92804e-06
ENSG00000224940	PRRT4	protein_coding	-0.632665	4.17075	24.2783	8.3372e-07	6.9732e-06
ENSG00000153551	CMTM7	protein_coding	0.45051	6.34528	24.2605	8.41493e-07	7.03324e-06
ENSG00000103855	CD276	protein_coding	0.451544	6.31203	24.244	8.48728e-07	7.0887e-06
ENSG00000178904	DPY19L3	protein_coding	-0.471408	5.95911	24.2349	8.52739e-07	7.11718e-06
ENSG00000166801	FAM111A	protein_coding	-0.416549	7.46219	24.2303	8.54784e-07	7.12922e-06
ENSG00000173894	CBX2	protein_coding	-1.08365	1.88094	24.2262	8.56601e-07	7.13935e-06
ENSG00000115009	CCL20	protein_coding	1.13919	1.64877	24.1981	8.69172e-07	7.23902e-06
ENSG00000147475	ERLIN2	protein_coding	-0.421744	7.13562	24.179	8.77849e-07	7.30615e-06
ENSG00000155265	GOLGA7B	protein_coding	0.828144	2.97699	24.1686	8.82617e-07	7.34067e-06
ENSG00000130707	ASS1	protein_coding	-0.445717	6.42699	24.1672	8.83249e-07	7.34077e-06
ENSG00000137207	YIPF3	protein_coding	0.434475	6.6954	24.1485	8.91872e-07	7.40724e-06
ENSG00000116679	IVNS1ABP	protein_coding	0.415482	8.49781	24.1083	9.10666e-07	7.55446e-06
ENSG00000047410	TPR	protein_coding	-0.418277	8.80133	24.1065	9.11511e-07	7.55446e-06
ENSG00000140400	MAN2C1	protein_coding	-0.452661	6.27646	24.1065	9.11514e-07	7.55446e-06
ENSG00000124233	SEMG1	protein_coding	-0.899941	2.65049	24.0786	9.24839e-07	7.65953e-06
ENSG00000105327	BBC3	protein_coding	0.715539	3.56481	24.063	9.32324e-07	7.71612e-06
ENSG00000196139	AKR1C3	protein_coding	0.799455	3.08868	24.0556	9.35936e-07	7.7406e-06
ENSG00000140961	OSGIN1	protein_coding	1.16466	1.55804	24.0489	9.39183e-07	7.76204e-06
ENSG00000100139	MICALL1	protein_coding	0.497325	5.66509	24.0303	9.48298e-07	7.8319e-06
ENSG00000147443	DOK2	protein_coding	0.449188	6.32602	24.0202	9.53293e-07	7.86471e-06
ENSG00000091106	NLRC4	protein_coding	0.817089	3.00317	24.0187	9.54035e-07	7.86471e-06
ENSG00000163754	GYG1	protein_coding	0.42386	6.96224	24.0183	9.54265e-07	7.86471e-06
ENSG00000173545	ZNF622	protein_coding	0.520502	5.34775	24.0038	9.61439e-07	7.91833e-06
ENSG00000172469	MANEA	protein_coding	-0.516972	5.39801	23.9873	9.69723e-07	7.98099e-06
ENSG00000113732	ATP6V0E1	protein_coding	0.415659	7.3699	23.9751	9.75892e-07	8.02619e-06
ENSG00000169554	ZEB2	protein_coding	-0.413331	7.92452	23.9713	9.77803e-07	8.03632e-06
ENSG00000140368	PSTPIP1	protein_coding	0.441224	6.48196	23.9504	9.88483e-07	8.11846e-06
ENSG00000151490	PTPRO	protein_coding	0.692265	3.69837	23.9131	1.00783e-06	8.27164e-06
ENSG00000163563	MNDA	protein_coding	-0.413632	7.50433	23.9074	1.01081e-06	8.2903e-06
ENSG00000147649	MTDH	protein_coding	-0.412491	8.06156	23.8953	1.01722e-06	8.33709e-06
ENSG00000160570	DEDD2	protein_coding	0.501349	5.61152	23.8926	1.01864e-06	8.343e-06
ENSG00000101639	CEP192	protein_coding	-0.452514	6.22264	23.8797	1.02549e-06	8.39324e-06
ENSG00000197971	MBP	protein_coding	0.413229	7.51103	23.8711	1.03008e-06	8.42502e-06
ENSG00000005189	REXO5	protein_coding	-0.555177	4.83729	23.866	1.03278e-06	8.4413e-06
ENSG00000133641	C12orf29	protein_coding	-0.534968	5.10748	23.8351	1.04954e-06	8.5723e-06
ENSG00000146416	AIG1	protein_coding	-1.12718	1.72242	23.8019	1.06777e-06	8.71521e-06
ENSG00000100079	LGALS2	protein_coding	0.947692	2.37598	23.7964	1.07081e-06	8.73397e-06
ENSG00000106399	RPA3	protein_coding	-0.480007	5.81908	23.7652	1.0883e-06	8.87055e-06
ENSG00000040633	PHF23	protein_coding	0.44677	6.31226	23.7507	1.09656e-06	8.93172e-06
ENSG00000172244	C5orf34	protein_coding	-0.774299	3.19309	23.7089	1.12061e-06	9.12136e-06
ENSG00000177721	ANXA2R	protein_coding	-0.719995	3.53171	23.6862	1.13393e-06	9.22344e-06
ENSG00000130724	CHMP2A	protein_coding	0.441632	6.40943	23.6739	1.1412e-06	9.27613e-06
ENSG00000123684	LPGAT1	protein_coding	0.421043	6.94011	23.667	1.14528e-06	9.30293e-06
ENSG00000072786	STK10	protein_coding	0.410494	7.95147	23.6358	1.16404e-06	9.44887e-06
ENSG00000103522	IL21R	protein_coding	0.877438	2.72261	23.6308	1.16703e-06	9.46665e-06
ENSG00000166938	DIS3L	protein_coding	-0.459553	6.04121	23.6237	1.17134e-06	9.49505e-06
ENSG00000111731	C2CD5	protein_coding	-0.441889	6.38252	23.6002	1.18575e-06	9.60527e-06
ENSG00000175857	GAPT	protein_coding	0.417768	7.06485	23.5973	1.18756e-06	9.61338e-06
ENSG00000161533	ACOX1	protein_coding	0.48388	5.75342	23.594	1.18961e-06	9.62337e-06
ENSG00000060140	STYK1	protein_coding	1.6572	0.121275	23.5862	1.19438e-06	9.65539e-06
ENSG00000166886	NAB2	protein_coding	0.531368	5.10347	23.4561	1.27795e-06	1.03239e-05
ENSG00000165185	KIAA1958	protein_coding	-0.582733	4.47181	23.4527	1.28021e-06	1.03351e-05
ENSG00000067191	CACNB1	protein_coding	-0.603588	4.30094	23.443	1.2867e-06	1.03804e-05
ENSG00000198720	ANKRD13B	protein_coding	-0.625106	4.13163	23.4235	1.29979e-06	1.04789e-05
ENSG00000103043	VAC14	protein_coding	0.47037	5.88605	23.4152	1.30546e-06	1.05138e-05
ENSG00000161911	TREML1	protein_coding	1.89504	-0.296182	23.4145	1.3059e-06	1.05138e-05
ENSG00000173200	PARP15	protein_coding	-0.508553	5.44288	23.4062	1.31156e-06	1.05522e-05
ENSG00000159905	ZNF221	protein_coding	-1.10774	1.71366	23.4014	1.31483e-06	1.05714e-05
ENSG00000109929	SC5D	protein_coding	-0.516737	5.29777	23.3716	1.33535e-06	1.0728e-05
ENSG00000135776	ABCB10	protein_coding	-0.4079	8.22024	23.3705	1.33613e-06	1.0728e-05
ENSG00000046651	OFD1	protein_coding	-0.448927	6.19686	23.3483	1.35165e-06	1.08453e-05
ENSG00000169083	AR	protein_coding	-1.43678	0.658446	23.3459	1.3533e-06	1.08511e-05
ENSG00000119772	DNMT3A	protein_coding	-0.561064	4.67535	23.315	1.37524e-06	1.10196e-05
ENSG00000117593	DARS2	protein_coding	-0.408652	7.41587	23.2951	1.38952e-06	1.11265e-05
ENSG00000074964	ARHGEF10L	protein_coding	0.584892	4.43808	23.2703	1.40756e-06	1.12633e-05
ENSG00000184232	OAF	protein_coding	0.438246	6.39445	23.2593	1.41562e-06	1.13201e-05
ENSG00000153246	PLA2R1	protein_coding	-0.984928	2.15576	23.249	1.42325e-06	1.13735e-05
ENSG00000149970	CNKSR2	protein_coding	-0.772675	3.16091	23.2341	1.43435e-06	1.14545e-05
ENSG00000113494	PRLR	protein_coding	-1.85599	-0.198344	23.2289	1.43823e-06	1.14777e-05
ENSG00000184557	SOCS3	protein_coding	1.6939	0.0112827	23.2058	1.45559e-06	1.16085e-05
ENSG00000100505	TRIM9	protein_coding	-0.684959	3.69059	23.1978	1.46167e-06	1.1649e-05
ENSG00000124688	MAD2L1BP	protein_coding	0.459545	5.98134	23.1759	1.47842e-06	1.17709e-05
ENSG00000125841	NRSN2	protein_coding	-0.867757	2.74177	23.1752	1.47895e-06	1.17709e-05
ENSG00000079337	RAPGEF3	protein_coding	0.849778	2.801	23.1733	1.48037e-06	1.17743e-05
ENSG00000132541	RIDA	protein_coding	-0.630277	4.05306	23.171	1.48214e-06	1.17805e-05
ENSG00000161692	DBF4B	protein_coding	-0.51696	5.27101	23.1525	1.49652e-06	1.18867e-05
ENSG00000038945	MSR1	protein_coding	1.01159	2.02675	23.1461	1.50149e-06	1.19158e-05
ENSG00000100580	TMED8	protein_coding	-0.406441	7.68732	23.1452	1.50218e-06	1.19158e-05
ENSG00000147036	LANCL3	protein_coding	-1.75356	-0.0419536	23.1394	1.50672e-06	1.19437e-05
ENSG00000107140	TESK1	protein_coding	0.571631	4.54222	23.0874	1.54804e-06	1.22601e-05
ENSG00000113273	ARSB	protein_coding	0.421614	6.77592	23.0866	1.5487e-06	1.22601e-05
ENSG00000135077	HAVCR2	protein_coding	1.15254	1.48121	23.0747	1.55827e-06	1.23276e-05
ENSG00000214253	FIS1	protein_coding	0.437118	6.38174	23.0556	1.57385e-06	1.24426e-05
ENSG00000004455	AK2	protein_coding	-0.415195	9.59013	23.05	1.5784e-06	1.24702e-05
ENSG00000106780	MEGF9	protein_coding	0.432619	6.46364	23.0466	1.5812e-06	1.2484e-05
ENSG00000144283	PKP4	protein_coding	-0.423757	6.70961	23.0379	1.58839e-06	1.25324e-05
ENSG00000134690	CDCA8	protein_coding	-0.426605	6.63284	23.0255	1.59869e-06	1.26053e-05
ENSG00000120833	SOCS2	protein_coding	-0.421699	6.76447	23.0199	1.60335e-06	1.26336e-05
ENSG00000014216	CAPN1	protein_coding	0.409317	7.24876	23.0175	1.60535e-06	1.26409e-05
ENSG00000106397	PLOD3	protein_coding	0.413294	7.04315	23.008	1.61326e-06	1.26948e-05
ENSG00000050730	TNIP3	protein_coding	1.80048	-0.182702	23.0038	1.61678e-06	1.2714e-05
ENSG00000171596	NMUR1	protein_coding	-1.11916	1.6615	22.9955	1.62385e-06	1.27611e-05
ENSG00000105568	PPP2R1A	protein_coding	0.40474	8.05284	22.9846	1.63301e-06	1.28246e-05
ENSG00000112218	GPR63	protein_coding	-0.614156	4.1595	22.9657	1.64921e-06	1.29432e-05
ENSG00000109775	UFSP2	protein_coding	-0.75778	3.22121	22.9519	1.66109e-06	1.30278e-05
ENSG00000187772	LIN28B	protein_coding	-0.533049	4.98037	22.9486	1.66388e-06	1.30411e-05
ENSG00000083168	KAT6A	protein_coding	-0.425353	6.63499	22.9234	1.68588e-06	1.32017e-05
ENSG00000168386	FILIP1L	protein_coding	0.910669	2.44979	22.9226	1.6866e-06	1.32017e-05
ENSG00000163257	DCAF16	protein_coding	-0.506831	5.37022	22.901	1.7056e-06	1.33415e-05
ENSG00000084764	MAPRE3	protein_coding	0.701991	3.53164	22.8516	1.75001e-06	1.36799e-05
ENSG00000126267	COX6B1	protein_coding	0.403219	8.23722	22.8214	1.77774e-06	1.38875e-05
ENSG00000166004	CEP295	protein_coding	-0.557669	4.63311	22.8076	1.7906e-06	1.39787e-05
ENSG00000178789	CD300LB	protein_coding	0.713761	3.44959	22.7979	1.79963e-06	1.404e-05
ENSG00000175203	DCTN2	protein_coding	0.411047	7.04892	22.7832	1.81342e-06	1.41383e-05
ENSG00000163156	SCNM1	protein_coding	0.439167	6.27721	22.7442	1.85063e-06	1.44189e-05
ENSG00000169891	REPS2	protein_coding	0.91039	2.43918	22.7419	1.85279e-06	1.44262e-05
ENSG00000196155	PLEKHG4	protein_coding	-0.96774	2.20032	22.7327	1.86171e-06	1.44861e-05
ENSG00000086548	CEACAM6	protein_coding	-0.405527	7.30265	22.7063	1.88749e-06	1.4677e-05
ENSG00000177989	ODF3B	protein_coding	-0.832467	2.86094	22.6983	1.89538e-06	1.47287e-05
ENSG00000108669	CYTH1	protein_coding	0.46372	5.87251	22.6594	1.93407e-06	1.50195e-05
ENSG00000166851	PLK1	protein_coding	-0.41044	7.03104	22.6578	1.93572e-06	1.50224e-05
ENSG00000170525	PFKFB3	protein_coding	0.461859	5.89301	22.6564	1.93716e-06	1.50238e-05
ENSG00000176623	RMDN1	protein_coding	-0.469432	5.8053	22.645	1.94867e-06	1.51032e-05
ENSG00000143862	ARL8A	protein_coding	0.44601	6.11393	22.6357	1.95813e-06	1.51665e-05
ENSG00000164821	DEFA4	protein_coding	-1.88207	-0.271912	22.6179	1.97638e-06	1.52979e-05
ENSG00000089685	BIRC5	protein_coding	-0.417256	6.77978	22.6145	1.97988e-06	1.5315e-05
ENSG00000115756	HPCAL1	protein_coding	0.476511	5.73464	22.6027	1.99207e-06	1.53992e-05
ENSG00000100889	PCK2	protein_coding	-0.44747	6.08658	22.5997	1.99516e-06	1.5413e-05
ENSG00000149150	SLC43A1	protein_coding	-0.422892	6.61385	22.5365	2.0619e-06	1.59182e-05
ENSG00000124151	NCOA3	protein_coding	0.410286	6.95056	22.5035	2.09764e-06	1.61836e-05
ENSG00000196912	ANKRD36B	protein_coding	-0.910779	2.42108	22.4749	2.12905e-06	1.64152e-05
ENSG00000166145	SPINT1	protein_coding	0.501406	5.39724	22.458	2.14791e-06	1.65498e-05
ENSG00000130816	DNMT1	protein_coding	-0.399973	8.2889	22.4559	2.15023e-06	1.65551e-05
ENSG00000166900	STX3	protein_coding	0.461041	5.87792	22.4549	2.15139e-06	1.65551e-05
ENSG00000108774	RAB5C	protein_coding	0.477206	5.69718	22.4412	2.16672e-06	1.66622e-05
ENSG00000258461	AC012651.1	protein_coding	-0.90046	2.48657	22.4365	2.17202e-06	1.66921e-05
ENSG00000130005	GAMT	protein_coding	-0.722632	3.37646	22.4331	2.17595e-06	1.67114e-05
ENSG00000117245	KIF17	protein_coding	-0.407786	7.07908	22.4288	2.18084e-06	1.67381e-05
ENSG00000148308	GTF3C5	protein_coding	-0.399886	8.06243	22.4269	2.18299e-06	1.67438e-05
ENSG00000155975	VPS37A	protein_coding	-0.510974	5.21908	22.412	2.19996e-06	1.68631e-05
ENSG00000131724	IL13RA1	protein_coding	0.462909	5.84766	22.4026	2.2108e-06	1.69352e-05
ENSG00000130518	IQCN	protein_coding	0.816196	2.88114	22.3824	2.23412e-06	1.71027e-05
ENSG00000173846	PLK3	protein_coding	0.616641	4.08657	22.3756	2.24202e-06	1.71521e-05
ENSG00000030110	BAK1	protein_coding	0.502363	5.34277	22.3159	2.31288e-06	1.76827e-05
ENSG00000134070	IRAK2	protein_coding	1.00283	2.002	22.2878	2.34697e-06	1.79319e-05
ENSG00000173559	NABP1	protein_coding	0.517756	5.08671	22.2799	2.35666e-06	1.79892e-05
ENSG00000169981	ZNF35	protein_coding	0.744372	3.21679	22.2792	2.35752e-06	1.79892e-05
ENSG00000132749	TESMIN	protein_coding	-0.492495	5.49692	22.2473	2.397e-06	1.82703e-05
ENSG00000118482	PHF3	protein_coding	-0.398879	7.54854	22.2469	2.39744e-06	1.82703e-05
ENSG00000164574	GALNT10	protein_coding	0.468837	5.76689	22.2437	2.40143e-06	1.82889e-05
ENSG00000104320	NBN	protein_coding	-0.416365	6.69792	22.2326	2.41539e-06	1.83834e-05
ENSG00000170043	TRAPPC1	protein_coding	0.411126	6.8638	22.2301	2.41855e-06	1.83956e-05
ENSG00000179981	TSHZ1	protein_coding	-0.49947	5.37462	22.2152	2.43733e-06	1.85265e-05
ENSG00000105402	NAPA	protein_coding	0.466749	5.79006	22.1968	2.4608e-06	1.86929e-05
ENSG00000181045	SLC26A11	protein_coding	1.57428	0.183567	22.1955	2.46249e-06	1.86937e-05
ENSG00000177675	CD163L1	protein_coding	0.938898	2.23876	22.194	2.46444e-06	1.86966e-05
ENSG00000076604	TRAF4	protein_coding	0.530641	4.89184	22.1921	2.46692e-06	1.87034e-05
ENSG00000157593	SLC35B2	protein_coding	0.41984	6.58396	22.1342	2.54236e-06	1.9263e-05
ENSG00000178623	GPR35	protein_coding	0.669066	3.68172	22.1319	2.5455e-06	1.92745e-05
ENSG00000134986	NREP	protein_coding	-0.687712	3.5604	22.1104	2.57408e-06	1.94784e-05
ENSG00000144218	AFF3	protein_coding	-0.404056	7.09157	22.1066	2.57926e-06	1.95052e-05
ENSG00000128512	DOCK4	protein_coding	0.643517	3.83924	22.1004	2.58756e-06	1.9553e-05
ENSG00000132953	XPO4	protein_coding	-0.417672	6.62435	22.0994	2.58889e-06	1.9553e-05
ENSG00000132334	PTPRE	protein_coding	0.397994	8.54524	22.0818	2.61282e-06	1.97211e-05
ENSG00000169246	NPIPB3	protein_coding	-0.864756	2.64728	22.0758	2.62095e-06	1.97699e-05
ENSG00000172725	CORO1B	protein_coding	0.46342	5.80855	22.0395	2.67095e-06	2.01342e-05
ENSG00000102572	STK24	protein_coding	0.421391	6.50697	22.0218	2.6957e-06	2.03079e-05
ENSG00000158882	TOMM40L	protein_coding	0.435467	6.20756	22.0185	2.7003e-06	2.03296e-05
ENSG00000170899	GSTA4	protein_coding	-1.04997	1.81212	22.0155	2.70457e-06	2.03488e-05
ENSG00000179604	CDC42EP4	protein_coding	0.583309	4.30289	22.0004	2.72588e-06	2.0496e-05
ENSG00000141391	PRELID3A	protein_coding	-0.86075	2.6472	21.9849	2.74811e-06	2.06501e-05
ENSG00000163071	SPATA18	protein_coding	0.582083	4.30536	21.9787	2.757e-06	2.07037e-05
ENSG00000075218	GTSE1	protein_coding	-0.458344	5.85636	21.9713	2.76765e-06	2.07706e-05
ENSG00000094631	HDAC6	protein_coding	-0.469647	5.73296	21.9684	2.77179e-06	2.07884e-05
ENSG00000186687	LYRM7	protein_coding	-0.493869	5.40529	21.947	2.80288e-06	2.10083e-05
ENSG00000180871	CXCR2	protein_coding	0.4483	5.96236	21.9162	2.84826e-06	2.13349e-05
ENSG00000143344	RGL1	protein_coding	0.730175	3.27243	21.9131	2.85275e-06	2.13551e-05
ENSG00000164442	CITED2	protein_coding	-0.398805	7.25946	21.8975	2.87609e-06	2.15162e-05
ENSG00000155659	VSIG4	protein_coding	1.01316	1.94171	21.8923	2.88386e-06	2.15606e-05
ENSG00000101057	MYBL2	protein_coding	-0.39546	7.56479	21.8559	2.93907e-06	2.19595e-05
ENSG00000159840	ZYX	protein_coding	0.398491	8.82679	21.8368	2.96845e-06	2.2165e-05
ENSG00000116771	AGMAT	protein_coding	1.09865	1.54948	21.8185	2.99704e-06	2.23545e-05
ENSG00000169439	SDC2	protein_coding	0.505133	5.19775	21.8181	2.9976e-06	2.23545e-05
ENSG00000196975	ANXA4	protein_coding	0.421656	6.44483	21.8081	3.01331e-06	2.24575e-05
ENSG00000157106	SMG1	protein_coding	-0.394774	7.53285	21.8036	3.02027e-06	2.24952e-05
ENSG00000155011	DKK2	protein_coding	0.700816	3.41375	21.7391	3.12354e-06	2.32498e-05
ENSG00000074935	TUBE1	protein_coding	-0.522949	4.91726	21.712	3.16796e-06	2.35656e-05
ENSG00000130396	AFDN	protein_coding	-0.42716	6.30948	21.7067	3.1768e-06	2.36165e-05
ENSG00000114473	IQCG	protein_coding	-0.622776	3.96623	21.7031	3.18282e-06	2.36463e-05
ENSG00000203989	RHOXF2B	protein_coding	-0.952972	2.17372	21.7011	3.18604e-06	2.36554e-05
ENSG00000005206	SPPL2B	protein_coding	-0.504747	5.20902	21.6952	3.19592e-06	2.37139e-05
ENSG00000082781	ITGB5	protein_coding	0.675542	3.59375	21.6722	3.23444e-06	2.39847e-05
ENSG00000119655	NPC2	protein_coding	0.473116	5.65152	21.6683	3.24103e-06	2.40185e-05
ENSG00000136732	GYPC	protein_coding	0.476812	5.6121	21.6593	3.25635e-06	2.41112e-05
ENSG00000138587	MNS1	protein_coding	-0.854796	2.61842	21.6585	3.2576e-06	2.41112e-05
ENSG00000213523	SRA1	protein_coding	0.442113	6.00693	21.6446	3.28127e-06	2.42711e-05
ENSG00000198121	LPAR1	protein_coding	0.781116	2.96724	21.6422	3.28544e-06	2.42868e-05
ENSG00000157500	APPL1	protein_coding	-0.426554	6.30059	21.6293	3.30756e-06	2.44351e-05
ENSG00000241343	RPL36A	protein_coding	-0.497194	5.29593	21.619	3.32547e-06	2.45521e-05
ENSG00000125247	TMTC4	protein_coding	-0.538804	4.6854	21.6052	3.34936e-06	2.47087e-05
ENSG00000163006	CCDC138	protein_coding	-0.612205	4.02584	21.6044	3.35087e-06	2.47087e-05
ENSG00000129245	FXR2	protein_coding	0.494393	5.34903	21.5992	3.35983e-06	2.47554e-05
ENSG00000145088	EAF2	protein_coding	-0.456262	5.83556	21.5984	3.36137e-06	2.47554e-05
ENSG00000079150	FKBP7	protein_coding	-0.859777	2.58347	21.5894	3.37712e-06	2.48559e-05
ENSG00000152910	CNTNAP4	protein_coding	0.80913	2.82263	21.5714	3.4089e-06	2.50742e-05
ENSG00000198829	SUCNR1	protein_coding	0.660697	3.65318	21.4735	3.58761e-06	2.63723e-05
ENSG00000244405	ETV5	protein_coding	0.406066	6.7894	21.4721	3.59017e-06	2.63747e-05
ENSG00000160712	IL6R	protein_coding	0.395034	8.87753	21.4411	3.64868e-06	2.67879e-05
ENSG00000177105	RHOG	protein_coding	0.392046	7.43507	21.439	3.65268e-06	2.68006e-05
ENSG00000163412	EIF4E3	protein_coding	0.969033	2.03908	21.4363	3.65785e-06	2.6822e-05
ENSG00000100439	ABHD4	protein_coding	0.579373	4.28133	21.4235	3.68228e-06	2.69844e-05
ENSG00000159346	ADIPOR1	protein_coding	0.390427	8.10413	21.4095	3.70933e-06	2.71658e-05
ENSG00000132274	TRIM22	protein_coding	0.390338	8.04909	21.4025	3.72294e-06	2.72486e-05
ENSG00000151498	ACAD8	protein_coding	0.479989	5.54087	21.3966	3.73439e-06	2.73155e-05
ENSG00000132300	PTCD3	protein_coding	-0.396492	7.13775	21.3938	3.73969e-06	2.73374e-05
ENSG00000108641	B9D1	protein_coding	-0.771934	3.00433	21.3742	3.77812e-06	2.76013e-05
ENSG00000186871	ERCC6L	protein_coding	-0.656781	3.68	21.3656	3.79524e-06	2.77092e-05
ENSG00000125772	GPCPD1	protein_coding	-0.403443	6.83816	21.3628	3.80067e-06	2.77197e-05
ENSG00000137094	DNAJB5	protein_coding	0.837278	2.68322	21.3625	3.80136e-06	2.77197e-05
ENSG00000058056	USP13	protein_coding	-0.427682	6.2231	21.3604	3.80552e-06	2.77329e-05
ENSG00000164512	ANKRD55	protein_coding	-1.42909	0.505464	21.3484	3.82941e-06	2.78899e-05
ENSG00000165716	DIPK1B	protein_coding	-1.01566	1.90502	21.3381	3.85e-06	2.80226e-05
ENSG00000124201	ZNFX1	protein_coding	0.413703	6.53496	21.3246	3.87734e-06	2.82042e-05
ENSG00000149260	CAPN5	protein_coding	1.04075	1.77125	21.3148	3.89713e-06	2.83162e-05
ENSG00000102098	SCML2	protein_coding	-0.52054	4.88359	21.3146	3.89752e-06	2.83162e-05
ENSG00000157551	KCNJ15	protein_coding	1.91449	-0.49569	21.2984	3.93066e-06	2.85395e-05
ENSG00000139624	CERS5	protein_coding	0.418862	6.4018	21.2876	3.95278e-06	2.86825e-05
ENSG00000213390	ARHGAP19	protein_coding	-0.412106	6.57106	21.2822	3.96403e-06	2.8742e-05
ENSG00000072694	FCGR2B	protein_coding	0.859565	2.55376	21.2813	3.96584e-06	2.8742e-05
ENSG00000174485	DENND4A	protein_coding	-0.417347	6.42868	21.277	3.97479e-06	2.87893e-05
ENSG00000111602	TIMELESS	protein_coding	-0.390076	7.56387	21.2632	4.00346e-06	2.89792e-05
ENSG00000115738	ID2	protein_coding	0.565684	4.35735	21.2401	4.05188e-06	2.93117e-05
ENSG00000119401	TRIM32	protein_coding	0.53214	4.6999	21.229	4.07541e-06	2.94631e-05
ENSG00000155792	DEPTOR	protein_coding	-1.03174	1.81959	21.2279	4.07778e-06	2.94631e-05
ENSG00000130517	PGPEP1	protein_coding	0.402652	6.82347	21.2081	4.12013e-06	2.97433e-05
ENSG00000130303	BST2	protein_coding	0.396423	7.05684	21.2075	4.12159e-06	2.97433e-05
ENSG00000117650	NEK2	protein_coding	-0.44818	5.87468	21.1916	4.15574e-06	2.99715e-05
ENSG00000214530	STARD10	protein_coding	1.06459	1.62808	21.1573	4.23095e-06	3.04953e-05
ENSG00000031691	CENPQ	protein_coding	-0.525885	4.78204	21.1338	4.28301e-06	3.08517e-05
ENSG00000140995	DEF8	protein_coding	0.481234	5.46957	21.1272	4.29791e-06	3.09402e-05
ENSG00000101928	MOSPD1	protein_coding	0.559192	4.40228	21.1105	4.33555e-06	3.11923e-05
ENSG00000071859	FAM50A	protein_coding	0.447733	5.87244	21.0972	4.36557e-06	3.13892e-05
ENSG00000146205	ANO7	protein_coding	-0.677007	3.55373	21.0876	4.38763e-06	3.15286e-05
ENSG00000073417	PDE8A	protein_coding	-0.687598	3.44242	21.0687	4.43117e-06	3.18222e-05
ENSG00000153786	ZDHHC7	protein_coding	0.42188	6.2861	21.0534	4.46651e-06	3.20565e-05
ENSG00000156172	C8orf37	protein_coding	-1.00844	1.87847	21.0447	4.48682e-06	3.21827e-05
ENSG00000129250	KIF1C	protein_coding	0.496753	5.19522	21.0398	4.49843e-06	3.22465e-05
ENSG00000103479	RBL2	protein_coding	-0.390826	7.25694	21.0161	4.55438e-06	3.26264e-05
ENSG00000139180	NDUFA9	protein_coding	0.533603	4.65533	21.015	4.55695e-06	3.26264e-05
ENSG00000030066	NUP160	protein_coding	-0.39425	7.05653	20.9894	4.61838e-06	3.30463e-05
ENSG00000177463	NR2C2	protein_coding	-0.4052	6.6795	20.9817	4.63697e-06	3.31593e-05
ENSG00000160352	ZNF714	protein_coding	-0.516446	4.87792	20.9727	4.65883e-06	3.32954e-05
ENSG00000147145	LPAR4	protein_coding	-1.18044	1.18087	20.9507	4.71262e-06	3.36596e-05
ENSG00000162746	FCRLB	protein_coding	1.44874	0.393524	20.9474	4.72066e-06	3.36951e-05
ENSG00000140497	SCAMP2	protein_coding	0.392359	7.14968	20.9463	4.72335e-06	3.36951e-05
ENSG00000101421	CHMP4B	protein_coding	0.394364	7.04546	20.9452	4.72613e-06	3.36951e-05
ENSG00000100448	CTSG	protein_coding	-0.395827	9.59001	20.9394	4.74047e-06	3.37769e-05
ENSG00000128965	CHAC1	protein_coding	-1.13299	1.34937	20.9051	4.82614e-06	3.43639e-05
ENSG00000005100	DHX33	protein_coding	-0.411248	6.48743	20.9041	4.82866e-06	3.43639e-05
ENSG00000173083	HPSE	protein_coding	0.516261	4.86422	20.8876	4.87027e-06	3.46392e-05
ENSG00000243927	MRPS6	protein_coding	0.446946	5.84805	20.8853	4.87623e-06	3.46608e-05
ENSG00000023445	BIRC3	protein_coding	0.882597	2.36448	20.8836	4.88067e-06	3.46715e-05
ENSG00000198556	ZNF789	protein_coding	-0.534907	4.61541	20.8689	4.91821e-06	3.49172e-05
ENSG00000145604	SKP2	protein_coding	-0.432713	6.01511	20.8663	4.92492e-06	3.49439e-05
ENSG00000113916	BCL6	protein_coding	0.562032	4.35409	20.8626	4.93445e-06	3.49906e-05
ENSG00000161638	ITGA5	protein_coding	0.389392	8.84611	20.8582	4.94573e-06	3.50496e-05
ENSG00000133606	MKRN1	protein_coding	0.400452	6.78017	20.8442	4.98202e-06	3.52856e-05
ENSG00000075651	PLD1	protein_coding	-0.477365	5.47929	20.8407	4.99107e-06	3.53286e-05
ENSG00000092607	TBX15	protein_coding	1.93603	-0.565218	20.8181	5.05043e-06	3.57273e-05
ENSG00000140367	UBE2Q2	protein_coding	-0.445141	5.85707	20.7761	5.16235e-06	3.64973e-05
ENSG00000141505	ASGR1	protein_coding	0.996398	1.8937	20.7684	5.18318e-06	3.66227e-05
ENSG00000185499	MUC1	protein_coding	-0.718871	3.244	20.7394	5.26224e-06	3.71591e-05
ENSG00000166224	SGPL1	protein_coding	0.449626	5.79845	20.7294	5.28979e-06	3.73313e-05
ENSG00000101152	DNAJC5	protein_coding	0.384353	7.80334	20.7161	5.3266e-06	3.75687e-05
ENSG00000053918	KCNQ1	protein_coding	0.787835	2.86494	20.69	5.39975e-06	3.80619e-05
ENSG00000184381	PLA2G6	protein_coding	-0.548206	4.4653	20.6718	5.4514e-06	3.84032e-05
ENSG00000186352	ANKRD37	protein_coding	-1.67939	-0.075725	20.6682	5.46151e-06	3.84515e-05
ENSG00000170571	EMB	protein_coding	-0.385436	8.60741	20.6625	5.4778e-06	3.85432e-05
ENSG00000119986	AVPI1	protein_coding	1.13589	1.30922	20.6488	5.51721e-06	3.87975e-05
ENSG00000167785	ZNF558	protein_coding	-0.557981	4.3689	20.6368	5.55196e-06	3.90187e-05
ENSG00000070182	SPTB	protein_coding	0.563002	4.32318	20.632	5.56582e-06	3.90928e-05
ENSG00000106367	AP1S1	protein_coding	0.433559	5.97625	20.6285	5.57606e-06	3.91415e-05
ENSG00000115365	LANCL1	protein_coding	-0.42901	6.03578	20.623	5.59202e-06	3.92303e-05
ENSG00000105499	PLA2G4C	protein_coding	0.756081	3.00178	20.6118	5.62483e-06	3.94371e-05
ENSG00000129667	RHBDF2	protein_coding	0.512589	4.8764	20.6101	5.62969e-06	3.94479e-05
ENSG00000136158	SPRY2	protein_coding	0.45568	5.71215	20.5869	5.69845e-06	3.9906e-05
ENSG00000175899	A2M	protein_coding	0.802389	2.79731	20.538	5.84591e-06	4.09145e-05
ENSG00000137819	PAQR5	protein_coding	-1.48343	0.28297	20.5325	5.86274e-06	4.10042e-05
ENSG00000125354	SEPTIN6	protein_coding	-0.400249	6.70489	20.5315	5.86567e-06	4.10042e-05
ENSG00000166965	RCCD1	protein_coding	-0.468896	5.55861	20.5238	5.88939e-06	4.11458e-05
ENSG00000178917	ZNF852	protein_coding	-0.767374	2.94875	20.5128	5.92347e-06	4.13595e-05
ENSG00000166012	TAF1D	protein_coding	-0.38248	7.68193	20.4969	5.97273e-06	4.16632e-05
ENSG00000140941	MAP1LC3B	protein_coding	0.456112	5.69308	20.4965	5.97402e-06	4.16632e-05
ENSG00000198053	SIRPA	protein_coding	0.384659	8.71494	20.4769	6.03546e-06	4.2067e-05
ENSG00000071553	ATP6AP1	protein_coding	0.382088	7.87738	20.4732	6.04734e-06	4.2125e-05
ENSG00000151914	DST	protein_coding	0.458973	5.65795	20.4593	6.09138e-06	4.24067e-05
ENSG00000197013	ZNF429	protein_coding	-0.701384	3.28904	20.4294	6.18707e-06	4.30355e-05
ENSG00000163623	NKX6-1	protein_coding	5.48959	-1.78305	20.4289	6.18897e-06	4.30355e-05
ENSG00000070371	CLTCL1	protein_coding	-0.382221	7.47288	20.395	6.29941e-06	4.3768e-05
ENSG00000132879	FBXO44	protein_coding	0.546264	4.44694	20.3943	6.30171e-06	4.3768e-05
ENSG00000204923	FBXO48	protein_coding	-0.825421	2.64783	20.373	6.37222e-06	4.42284e-05
ENSG00000166123	GPT2	protein_coding	-0.424463	6.08774	20.372	6.37546e-06	4.42284e-05
ENSG00000092529	CAPN3	protein_coding	-0.83303	2.61344	20.3688	6.38631e-06	4.42776e-05
ENSG00000187837	HIST1H1C	protein_coding	0.661885	3.54523	20.3644	6.40109e-06	4.43542e-05
ENSG00000151117	TMEM86A	protein_coding	1.19113	1.04773	20.3527	6.4402e-06	4.45837e-05
ENSG00000165997	ARL5B	protein_coding	-0.538386	4.50655	20.3522	6.44175e-06	4.45837e-05
ENSG00000163686	ABHD6	protein_coding	0.690481	3.35574	20.3446	6.46747e-06	4.47355e-05
ENSG00000171992	SYNPO	protein_coding	0.834058	2.56817	20.3365	6.4951e-06	4.49004e-05
ENSG00000104853	CLPTM1	protein_coding	0.408001	6.43691	20.3343	6.50228e-06	4.49238e-05
ENSG00000101445	PPP1R16B	protein_coding	0.399873	6.6531	20.3325	6.50853e-06	4.49408e-05
ENSG00000104885	DOT1L	protein_coding	-0.399308	6.67291	20.3268	6.52785e-06	4.50479e-05
ENSG00000070718	AP3M2	protein_coding	-0.503389	4.96145	20.3153	6.56717e-06	4.52928e-05
ENSG00000077458	FAM76B	protein_coding	-0.514046	4.79121	20.3129	6.57553e-06	4.53241e-05
ENSG00000198924	DCLRE1A	protein_coding	-0.496968	5.05539	20.3042	6.60542e-06	4.55036e-05
ENSG00000090889	KIF4A	protein_coding	-0.439268	5.86736	20.3011	6.61614e-06	4.55509e-05
ENSG00000150764	DIXDC1	protein_coding	-0.549976	4.39264	20.2995	6.62185e-06	4.55637e-05
ENSG00000138468	SENP7	protein_coding	-0.545719	4.42944	20.2878	6.66236e-06	4.57963e-05
ENSG00000066117	SMARCD1	protein_coding	0.396897	6.7334	20.2875	6.6634e-06	4.57963e-05
ENSG00000117479	SLC19A2	protein_coding	-0.636904	3.69486	20.263	6.74926e-06	4.63431e-05
ENSG00000174837	ADGRE1	protein_coding	1.09735	1.39129	20.2626	6.75078e-06	4.63431e-05
ENSG00000161888	SPC24	protein_coding	-0.487665	5.20295	20.2605	6.75802e-06	4.63659e-05
ENSG00000132196	HSD17B7	protein_coding	-0.516115	4.76194	20.2522	6.78749e-06	4.65411e-05
ENSG00000185477	GPRIN3	protein_coding	0.869646	2.3536	20.2364	6.84368e-06	4.68842e-05
ENSG00000135913	USP37	protein_coding	-0.514425	4.77607	20.2359	6.84545e-06	4.68842e-05
ENSG00000104774	MAN2B1	protein_coding	0.379841	7.76136	20.2142	6.92366e-06	4.73924e-05
ENSG00000136280	CCM2	protein_coding	0.412622	6.30208	20.2109	6.9356e-06	4.74467e-05
ENSG00000174442	ZWILCH	protein_coding	-0.450266	5.7238	20.2095	6.94072e-06	4.74543e-05
ENSG00000101665	SMAD7	protein_coding	0.641675	3.65285	20.2015	6.96979e-06	4.76255e-05
ENSG00000132205	EMILIN2	protein_coding	0.378816	8.1502	20.1591	7.12614e-06	4.86658e-05
ENSG00000100554	ATP6V1D	protein_coding	0.44443	5.78142	20.1242	7.2571e-06	4.95316e-05
ENSG00000158106	RHPN1	protein_coding	-0.60404	3.93474	20.0835	7.41337e-06	5.0569e-05
ENSG00000165029	ABCA1	protein_coding	0.509865	4.80252	20.0769	7.43914e-06	5.07156e-05
ENSG00000087589	CASS4	protein_coding	0.712876	3.18492	20.0755	7.44439e-06	5.07221e-05
ENSG00000035499	DEPDC1B	protein_coding	-0.448897	5.72271	20.0707	7.46309e-06	5.08203e-05
ENSG00000100297	MCM5	protein_coding	-0.378947	7.48542	20.0508	7.54115e-06	5.13223e-05
ENSG00000170776	AKAP13	protein_coding	0.389832	6.8665	20.0461	7.5598e-06	5.14197e-05
ENSG00000150337	FCGR1A	protein_coding	-0.395529	6.70234	20.0178	7.67229e-06	5.21548e-05
ENSG00000185621	LMLN	protein_coding	-0.519636	4.66666	20.0029	7.73261e-06	5.25347e-05
ENSG00000148600	CDHR1	protein_coding	-1.64719	-0.041617	19.9803	7.82441e-06	5.31279e-05
ENSG00000184635	ZNF93	protein_coding	-0.709345	3.19881	19.9777	7.83505e-06	5.31696e-05
ENSG00000107731	UNC5B	protein_coding	0.913995	2.12857	19.9756	7.8438e-06	5.31985e-05
ENSG00000156469	MTERF3	protein_coding	-0.474046	5.35716	19.9631	7.89525e-06	5.3509e-05
ENSG00000171812	COL8A2	protein_coding	-0.459076	5.60078	19.9623	7.89863e-06	5.3509e-05
ENSG00000100099	HPS4	protein_coding	-0.39995	6.53801	19.9425	7.98078e-06	5.40346e-05
ENSG00000162909	CAPN2	protein_coding	0.382425	9.05711	19.9404	7.9896e-06	5.40634e-05
ENSG00000117266	CDK18	protein_coding	0.45841	5.60656	19.9185	8.08152e-06	5.46542e-05
ENSG00000189403	HMGB1	protein_coding	-0.381915	9.02733	19.9094	8.11981e-06	5.48818e-05
ENSG00000214013	GANC	protein_coding	-0.473613	5.35366	19.893	8.18979e-06	5.53232e-05
ENSG00000161929	SCIMP	protein_coding	0.570753	4.16299	19.888	8.21129e-06	5.54367e-05
ENSG00000179855	GIPC3	protein_coding	-1.54579	0.095241	19.877	8.25863e-06	5.57246e-05
ENSG00000160299	PCNT	protein_coding	-0.398532	6.56068	19.871	8.28493e-06	5.58442e-05
ENSG00000180644	PRF1	protein_coding	1.36869	0.476605	19.8708	8.2858e-06	5.58442e-05
ENSG00000146733	PSPH	protein_coding	-0.559838	4.25124	19.8588	8.33781e-06	5.61628e-05
ENSG00000132932	ATP8A2	protein_coding	1.37073	0.483031	19.8495	8.37848e-06	5.64046e-05
ENSG00000180318	ALX1	protein_coding	-0.479725	5.24327	19.837	8.43337e-06	5.67419e-05
ENSG00000167766	ZNF83	protein_coding	-0.429653	5.92077	19.8323	8.45424e-06	5.6822e-05
ENSG00000158555	GDPD5	protein_coding	0.483318	5.18799	19.8321	8.45489e-06	5.6822e-05
ENSG00000239713	APOBEC3G	protein_coding	0.532944	4.50195	19.8289	8.46935e-06	5.68869e-05
ENSG00000129675	ARHGEF6	protein_coding	-0.375677	8.04803	19.8247	8.48767e-06	5.69777e-05
ENSG00000102007	PLP2	protein_coding	0.417948	6.10046	19.8233	8.49396e-06	5.69876e-05
ENSG00000131368	MRPS25	protein_coding	-0.397988	6.5606	19.8158	8.52733e-06	5.7179e-05
ENSG00000159147	DONSON	protein_coding	-0.509178	4.76965	19.8061	8.5707e-06	5.74373e-05
ENSG00000164307	ERAP1	protein_coding	-0.383508	7.01952	19.7963	8.61509e-06	5.77021e-05
ENSG00000147654	EBAG9	protein_coding	-0.506255	4.80737	19.7676	8.74529e-06	5.8541e-05
ENSG00000133574	GIMAP4	protein_coding	1.50882	0.0987605	19.7552	8.80239e-06	5.889e-05
ENSG00000197121	PGAP1	protein_coding	-0.612309	3.81251	19.7517	8.81827e-06	5.89628e-05
ENSG00000213160	KLHL23	protein_coding	-0.561825	4.21832	19.7498	8.82702e-06	5.8988e-05
ENSG00000164983	TMEM65	protein_coding	-0.456472	5.59089	19.7426	8.8606e-06	5.9179e-05
ENSG00000082074	FYB1	protein_coding	0.422493	5.992	19.7396	8.87445e-06	5.92381e-05
ENSG00000067167	TRAM1	protein_coding	-0.395176	6.60271	19.7164	8.98258e-06	5.99261e-05
ENSG00000182963	GJC1	protein_coding	-2.11959	-0.811936	19.7012	9.05458e-06	6.03724e-05
ENSG00000172830	SSH3	protein_coding	-0.470771	5.3723	19.6841	9.13569e-06	6.08788e-05
ENSG00000165983	PTER	protein_coding	-0.499871	4.88601	19.6829	9.14146e-06	6.08831e-05
ENSG00000167123	CERCAM	protein_coding	-0.614927	3.79919	19.6533	9.28416e-06	6.17987e-05
ENSG00000111801	BTN3A3	protein_coding	-0.730657	3.05324	19.6521	9.29034e-06	6.1805e-05
ENSG00000172354	GNB2	protein_coding	0.375498	7.42386	19.6474	9.31323e-06	6.19225e-05
ENSG00000151650	VENTX	protein_coding	0.698397	3.23445	19.6454	9.32277e-06	6.19512e-05
ENSG00000115844	DLX2	protein_coding	0.883846	2.22764	19.6272	9.41205e-06	6.25093e-05
ENSG00000179761	PIPOX	protein_coding	0.932432	2.01788	19.6043	9.52532e-06	6.32261e-05
ENSG00000165028	NIPSNAP3B	protein_coding	-0.808109	2.65262	19.5997	9.54841e-06	6.33439e-05
ENSG00000143819	EPHX1	protein_coding	0.52339	4.55953	19.5936	9.57905e-06	6.35115e-05
ENSG00000197629	MPEG1	protein_coding	0.373849	7.70918	19.5906	9.59384e-06	6.3574e-05
ENSG00000167325	RRM1	protein_coding	-0.373848	7.67735	19.5823	9.63559e-06	6.38149e-05
ENSG00000143842	SOX13	protein_coding	1.50408	0.0982291	19.5698	9.6989e-06	6.41982e-05
ENSG00000183826	BTBD9	protein_coding	0.491909	4.98567	19.5649	9.72372e-06	6.43265e-05
ENSG00000149809	TM7SF2	protein_coding	-0.721324	3.09664	19.5603	9.74753e-06	6.44481e-05
ENSG00000198879	SFMBT2	protein_coding	-0.380656	7.05357	19.5513	9.79358e-06	6.47163e-05
ENSG00000122861	PLAU	protein_coding	0.437629	5.79258	19.5341	9.88182e-06	6.52631e-05
ENSG00000144445	KANSL1L	protein_coding	-0.516138	4.61949	19.5229	9.94017e-06	6.56118e-05
ENSG00000135823	STX6	protein_coding	0.420508	5.98676	19.5162	9.97485e-06	6.5804e-05
ENSG00000156675	RAB11FIP1	protein_coding	0.434617	5.81761	19.5133	9.98991e-06	6.58341e-05
ENSG00000148019	CEP78	protein_coding	-0.458353	5.53649	19.5132	9.99054e-06	6.58341e-05
ENSG00000164032	H2AFZ	protein_coding	-0.382158	9.63248	19.5121	9.99649e-06	6.58367e-05
ENSG00000163913	IFT122	protein_coding	-0.459666	5.5287	19.511	1.00023e-05	6.58383e-05
ENSG00000155100	OTUD6B	protein_coding	-0.54587	4.32541	19.4889	1.01187e-05	6.65677e-05
ENSG00000163584	RPL22L1	protein_coding	-0.378212	9.0618	19.4859	1.01343e-05	6.66331e-05
ENSG00000072501	SMC1A	protein_coding	-0.37222	8.21605	19.4626	1.02587e-05	6.74135e-05
ENSG00000131149	GSE1	protein_coding	-0.372666	7.706	19.458	1.02835e-05	6.75279e-05
ENSG00000113966	ARL6	protein_coding	-0.984188	1.81212	19.4573	1.02875e-05	6.75279e-05
ENSG00000101307	SIRPB1	protein_coding	0.372136	8.09364	19.4492	1.03313e-05	6.77779e-05
ENSG00000185633	NDUFA4L2	protein_coding	-1.50203	0.156024	19.4455	1.03511e-05	6.78702e-05
ENSG00000163428	LRRC58	protein_coding	-0.389287	6.69268	19.432	1.04247e-05	6.83149e-05
ENSG00000140030	GPR65	protein_coding	0.567088	4.12573	19.4289	1.04413e-05	6.83855e-05
ENSG00000138035	PNPT1	protein_coding	-0.399035	6.42245	19.4264	1.0455e-05	6.84373e-05
ENSG00000148737	TCF7L2	protein_coding	0.678902	3.30612	19.4241	1.04678e-05	6.84834e-05
ENSG00000131100	ATP6V1E1	protein_coding	0.3787	7.05882	19.3666	1.07875e-05	7.05358e-05
ENSG00000105383	CD33	protein_coding	0.375465	7.23699	19.3652	1.07959e-05	7.05519e-05
ENSG00000124491	F13A1	protein_coding	-1.10249	1.33396	19.3415	1.09305e-05	7.13919e-05
ENSG00000131153	GINS2	protein_coding	-0.439702	5.7407	19.3193	1.10584e-05	7.21874e-05
ENSG00000117643	MAN1C1	protein_coding	-0.996928	1.76503	19.3076	1.11262e-05	7.25902e-05
ENSG00000081087	OSTM1	protein_coding	0.416896	6.00211	19.3054	1.11392e-05	7.26352e-05
ENSG00000163964	PIGX	protein_coding	-0.431304	5.82623	19.2915	1.12203e-05	7.31234e-05
ENSG00000185669	SNAI3	protein_coding	1.0163	1.6176	19.2904	1.12271e-05	7.31277e-05
ENSG00000158050	DUSP2	protein_coding	0.615818	3.74509	19.288	1.12412e-05	7.3179e-05
ENSG00000078674	PCM1	protein_coding	-0.370486	8.03667	19.2842	1.12637e-05	7.3285e-05
ENSG00000175745	NR2F1	protein_coding	-1.0185	1.63554	19.2773	1.13044e-05	7.35094e-05
ENSG00000145365	TIFA	protein_coding	-0.504499	4.7382	19.2654	1.13751e-05	7.39001e-05
ENSG00000111639	MRPL51	protein_coding	0.38238	6.86409	19.2651	1.13769e-05	7.39001e-05
ENSG00000134830	C5AR2	protein_coding	1.0145	1.63202	19.2405	1.15242e-05	7.48157e-05
ENSG00000174799	CEP135	protein_coding	-0.463408	5.38659	19.2228	1.16314e-05	7.54699e-05
ENSG00000164638	SLC29A4	protein_coding	-1.28505	0.73614	19.2137	1.16874e-05	7.57922e-05
ENSG00000105429	MEGF8	protein_coding	0.392475	6.53681	19.1981	1.17829e-05	7.63695e-05
ENSG00000047230	CTPS2	protein_coding	-0.56208	4.15392	19.1908	1.18283e-05	7.6589e-05
ENSG00000176890	TYMS	protein_coding	-0.387559	6.68286	19.1906	1.18297e-05	7.6589e-05
ENSG00000128165	ADM2	protein_coding	-1.11909	1.25332	19.1771	1.19131e-05	7.7087e-05
ENSG00000078124	ACER3	protein_coding	0.459124	5.4396	19.1674	1.19741e-05	7.74391e-05
ENSG00000176087	SLC35A4	protein_coding	0.382215	6.8355	19.1497	1.20859e-05	7.81194e-05
ENSG00000163069	SGCB	protein_coding	0.55117	4.23188	19.1454	1.21127e-05	7.825e-05
ENSG00000241553	ARPC4	protein_coding	0.370202	7.42634	19.1435	1.21252e-05	7.82878e-05
ENSG00000084444	FAM234B	protein_coding	0.498142	4.79781	19.1373	1.21645e-05	7.84989e-05
ENSG00000075702	WDR62	protein_coding	-0.461948	5.39658	19.1239	1.22503e-05	7.90092e-05
ENSG00000189057	FAM111B	protein_coding	0.704124	3.12061	19.1157	1.23028e-05	7.93046e-05
ENSG00000177465	ACOT4	protein_coding	-1.31661	0.566709	19.0917	1.24584e-05	8.0264e-05
ENSG00000134057	CCNB1	protein_coding	-0.373434	7.19995	19.08	1.25351e-05	8.07144e-05
ENSG00000187790	FANCM	protein_coding	-0.528331	4.4354	19.0787	1.25439e-05	8.07273e-05
ENSG00000247596	TWF2	protein_coding	0.445913	5.63434	19.0755	1.25645e-05	8.08157e-05
ENSG00000166595	CIAO2B	protein_coding	0.408386	6.12773	19.0675	1.26173e-05	8.11111e-05
ENSG00000137831	UACA	protein_coding	-0.43098	5.80145	19.0661	1.26269e-05	8.11291e-05
ENSG00000145241	CENPC	protein_coding	-0.473965	5.1715	19.0524	1.27178e-05	8.16688e-05
ENSG00000111247	RAD51AP1	protein_coding	-0.474224	5.16262	19.0494	1.2738e-05	8.17116e-05
ENSG00000198909	MAP3K3	protein_coding	0.433414	5.77122	19.0493	1.27383e-05	8.17116e-05
ENSG00000123360	PDE1B	protein_coding	0.453902	5.51989	19.0435	1.27772e-05	8.19164e-05
ENSG00000171657	GPR82	protein_coding	0.736806	2.94576	19.0425	1.27842e-05	8.1917e-05
ENSG00000197555	SIPA1L1	protein_coding	0.535237	4.36502	19.0274	1.28854e-05	8.25212e-05
ENSG00000046653	GPM6B	protein_coding	-0.834712	2.41522	19.0228	1.29167e-05	8.2642e-05
ENSG00000048392	RRM2B	protein_coding	0.377092	6.94753	19.0226	1.29183e-05	8.2642e-05
ENSG00000133740	E2F5	protein_coding	-0.687862	3.21465	18.9848	1.31766e-05	8.42339e-05
ENSG00000185896	LAMP1	protein_coding	0.36753	8.19954	18.9841	1.31813e-05	8.42339e-05
ENSG00000175197	DDIT3	protein_coding	0.496374	4.81117	18.9767	1.32323e-05	8.45008e-05
ENSG00000076067	RBMS2	protein_coding	0.61353	3.70921	18.976	1.32374e-05	8.45008e-05
ENSG00000006062	MAP3K14	protein_coding	0.80882	2.56431	18.9737	1.32534e-05	8.45573e-05
ENSG00000082397	EPB41L3	protein_coding	0.367673	7.65687	18.946	1.34469e-05	8.5746e-05
ENSG00000134028	ADAMDEC1	protein_coding	1.04802	1.42302	18.9425	1.34719e-05	8.58592e-05
ENSG00000138801	PAPSS1	protein_coding	0.387044	6.61372	18.934	1.35316e-05	8.61931e-05
ENSG00000187720	THSD4	protein_coding	0.686657	3.2024	18.9195	1.36352e-05	8.68062e-05
ENSG00000265972	TXNIP	protein_coding	0.369194	8.63074	18.9053	1.37369e-05	8.74065e-05
ENSG00000143409	MINDY1	protein_coding	0.495552	4.80696	18.8967	1.37993e-05	8.77562e-05
ENSG00000116001	TIA1	protein_coding	-0.385283	6.65038	18.8947	1.38138e-05	8.78013e-05
ENSG00000076382	SPAG5	protein_coding	-0.371572	7.18363	18.863	1.4045e-05	8.92107e-05
ENSG00000133302	SLF1	protein_coding	-0.485953	4.93842	18.8622	1.40506e-05	8.92107e-05
ENSG00000130844	ZNF331	protein_coding	-0.552171	4.19527	18.8453	1.4176e-05	8.99584e-05
ENSG00000185022	MAFF	protein_coding	0.714205	3.04733	18.8305	1.42866e-05	9.06119e-05
ENSG00000112773	TENT5A	protein_coding	-0.366631	7.56115	18.8194	1.43702e-05	9.10931e-05
ENSG00000117228	GBP1	protein_coding	1.34905	0.430649	18.8024	1.44981e-05	9.1855e-05
ENSG00000115355	CCDC88A	protein_coding	-0.379705	6.79182	18.7953	1.45529e-05	9.21525e-05
ENSG00000172936	MYD88	protein_coding	0.37493	6.95082	18.782	1.4654e-05	9.27433e-05
ENSG00000136003	ISCU	protein_coding	0.401452	6.20852	18.7798	1.46717e-05	9.28055e-05
ENSG00000079134	THOC1	protein_coding	-0.407552	6.07638	18.7659	1.47788e-05	9.3433e-05
ENSG00000171631	P2RY6	protein_coding	0.491616	4.83611	18.7613	1.48146e-05	9.36096e-05
ENSG00000182117	NOP10	protein_coding	0.367841	7.34525	18.7517	1.48892e-05	9.40307e-05
ENSG00000197872	FAM49A	protein_coding	0.426559	5.80539	18.7332	1.50344e-05	9.48973e-05
ENSG00000206127	GOLGA8O	protein_coding	-0.898705	2.07504	18.7273	1.50805e-05	9.51377e-05
ENSG00000116761	CTH	protein_coding	-0.968331	1.79873	18.7158	1.5172e-05	9.56636e-05
ENSG00000170734	POLH	protein_coding	0.417368	5.91878	18.7102	1.52164e-05	9.58925e-05
ENSG00000164323	CFAP97	protein_coding	-0.40364	6.14064	18.7077	1.52369e-05	9.59706e-05
ENSG00000113119	TMCO6	protein_coding	-0.506696	4.61966	18.7057	1.52527e-05	9.59822e-05
ENSG00000163516	ANKZF1	protein_coding	-0.415462	5.94923	18.7054	1.5255e-05	9.59822e-05
ENSG00000131398	KCNC3	protein_coding	-0.747635	2.8802	18.7008	1.52921e-05	9.61647e-05
ENSG00000183763	TRAIP	protein_coding	-0.544735	4.24951	18.6964	1.53268e-05	9.6332e-05
ENSG00000174007	CEP19	protein_coding	-0.570802	4.01585	18.6911	1.53698e-05	9.65509e-05
ENSG00000119227	PIGZ	protein_coding	-1.01382	1.6308	18.6774	1.54806e-05	9.71955e-05
ENSG00000125037	EMC3	protein_coding	0.413613	5.95963	18.6646	1.5585e-05	9.77638e-05
ENSG00000114127	XRN1	protein_coding	-0.409847	6.006	18.6643	1.55877e-05	9.77638e-05
ENSG00000167005	NUDT21	protein_coding	-0.364705	7.75849	18.6617	1.56086e-05	9.78432e-05
ENSG00000163624	CDS1	protein_coding	-1.66025	-0.205239	18.6595	1.56269e-05	9.78719e-05
ENSG00000163606	CD200R1	protein_coding	0.548408	4.1911	18.6591	1.56297e-05	9.78719e-05
ENSG00000069399	BCL3	protein_coding	0.669117	3.29573	18.6247	1.59141e-05	9.96001e-05
ENSG00000183688	RFLNB	protein_coding	-0.370351	9.15766	18.616	1.59869e-05	9.99562e-05
ENSG00000131446	MGAT1	protein_coding	0.364409	7.74027	18.6155	1.59915e-05	9.99562e-05
ENSG00000119801	YPEL5	protein_coding	0.419998	5.86932	18.6149	1.59964e-05	9.99562e-05
ENSG00000180304	OAZ2	protein_coding	0.39551	6.30357	18.5988	1.61325e-05	0.000100754
ENSG00000189362	NEMP2	protein_coding	-0.563785	4.05733	18.5927	1.61836e-05	0.00010102
ENSG00000132819	RBM38	protein_coding	0.372352	6.98601	18.5864	1.62375e-05	0.000101302
ENSG00000118260	CREB1	protein_coding	-0.406742	6.04382	18.5732	1.63504e-05	0.000101953
ENSG00000060982	BCAT1	protein_coding	-0.403811	6.10413	18.5683	1.63924e-05	0.000102161
ENSG00000198042	MAK16	protein_coding	-0.407474	6.03155	18.5655	1.64166e-05	0.000102258
ENSG00000102531	FNDC3A	protein_coding	-0.400935	6.16689	18.5635	1.64333e-05	0.000102259
ENSG00000108055	SMC3	protein_coding	-0.366633	7.2909	18.5635	1.64341e-05	0.000102259
ENSG00000095303	PTGS1	protein_coding	0.363819	7.67046	18.5455	1.65899e-05	0.000103175
ENSG00000163449	TMEM169	protein_coding	0.821441	2.40851	18.5429	1.66119e-05	0.000103257
ENSG00000025770	NCAPH2	protein_coding	-0.400995	6.17186	18.5201	1.68121e-05	0.000104447
ENSG00000112378	PERP	protein_coding	-2.10527	-0.87227	18.5187	1.68242e-05	0.000104467
ENSG00000241399	CD302	protein_coding	-0.573637	3.96257	18.5141	1.68655e-05	0.000104669
ENSG00000136682	CBWD2	protein_coding	-0.42669	5.77708	18.5089	1.69112e-05	0.000104898
ENSG00000117525	F3	protein_coding	-0.511194	4.51816	18.4683	1.72757e-05	0.000107102
ENSG00000157654	PALM2-AKAP2	protein_coding	-0.367028	7.20712	18.4611	1.73407e-05	0.000107449
ENSG00000064607	SUGP2	protein_coding	-0.362433	8.07158	18.4463	1.74762e-05	0.000108232
ENSG00000082805	ERC1	protein_coding	0.470416	5.10153	18.4445	1.74925e-05	0.000108276
ENSG00000106524	ANKMY2	protein_coding	-0.530123	4.33638	18.4402	1.7532e-05	0.000108464
ENSG00000146670	CDCA5	protein_coding	-0.376591	6.76519	18.3749	1.81428e-05	0.000112184
ENSG00000178252	WDR6	protein_coding	-0.371275	6.94211	18.3678	1.82114e-05	0.000112549
ENSG00000173535	TNFRSF10C	protein_coding	1.22661	0.721928	18.3584	1.83014e-05	0.000113046
ENSG00000197070	ARRDC1	protein_coding	-0.407914	5.9993	18.3539	1.83444e-05	0.000113253
ENSG00000184524	CEND1	protein_coding	-2.01303	-0.780307	18.3522	1.83603e-05	0.000113292
ENSG00000146826	MAP11	protein_coding	0.473841	5.04394	18.3509	1.83729e-05	0.000113311
ENSG00000154767	XPC	protein_coding	0.430451	5.70773	18.3497	1.83844e-05	0.000113323
ENSG00000165995	CACNB2	protein_coding	-1.1302	1.09104	18.3453	1.84269e-05	0.000113526
ENSG00000160209	PDXK	protein_coding	0.361886	7.64388	18.3442	1.84375e-05	0.000113532
ENSG00000106012	IQCE	protein_coding	0.479684	4.92734	18.3381	1.84974e-05	0.000113841
ENSG00000143036	SLC44A3	protein_coding	1.93724	-0.699451	18.3212	1.8662e-05	0.000114794
ENSG00000123159	GIPC1	protein_coding	0.792242	2.58061	18.3181	1.86926e-05	0.000114923
ENSG00000136560	TANK	protein_coding	0.391744	6.31869	18.3157	1.87156e-05	0.00011495
ENSG00000125384	PTGER2	protein_coding	-0.471751	5.05983	18.3156	1.87163e-05	0.00011495
ENSG00000117000	RLF	protein_coding	-0.448476	5.45135	18.3101	1.87705e-05	0.000115169
ENSG00000081985	IL12RB2	protein_coding	-0.466231	5.14768	18.31	1.87716e-05	0.000115169
ENSG00000135424	ITGA7	protein_coding	-0.362666	7.39855	18.3061	1.88106e-05	0.000115349
ENSG00000166451	CENPN	protein_coding	-0.506233	4.55017	18.2948	1.89222e-05	0.000115973
ENSG00000143740	SNAP47	protein_coding	0.424535	5.77653	18.2902	1.89676e-05	0.000116191
ENSG00000143222	UFC1	protein_coding	0.360744	8.16091	18.2831	1.90393e-05	0.00011657
ENSG00000205269	TMEM170B	protein_coding	-0.374348	6.78907	18.2668	1.92029e-05	0.000117511
ENSG00000159348	CYB5R1	protein_coding	0.39399	6.25686	18.2645	1.92259e-05	0.000117591
ENSG00000135919	SERPINE2	protein_coding	-0.854744	2.25064	18.258	1.92912e-05	0.00011793
ENSG00000017483	SLC38A5	protein_coding	-0.411999	5.92519	18.2509	1.93638e-05	0.000118312
ENSG00000074695	LMAN1	protein_coding	-0.363179	7.30461	18.2445	1.94291e-05	0.00011865
ENSG00000137409	MTCH1	protein_coding	0.36078	7.65463	18.2292	1.9585e-05	0.00011954
ENSG00000186407	CD300E	protein_coding	1.19686	0.846197	18.2244	1.96345e-05	0.00011978
ENSG00000073464	CLCN4	protein_coding	0.81765	2.43189	18.2138	1.97442e-05	0.000120388
ENSG00000100412	ACO2	protein_coding	0.371236	6.87858	18.1957	1.99324e-05	0.000121473
ENSG00000180353	HCLS1	protein_coding	0.367026	9.25852	18.1942	1.99485e-05	0.000121508
ENSG00000163923	RPL39L	protein_coding	-0.47868	4.92354	18.1904	1.99886e-05	0.00012169
ENSG00000176903	PNMA1	protein_coding	-0.459646	5.23446	18.1842	2.00531e-05	0.00012202
ENSG00000172292	CERS6	protein_coding	-0.389675	6.3256	18.1627	2.02813e-05	0.000123345
ENSG00000133216	EPHB2	protein_coding	0.796553	2.52036	18.1414	2.05093e-05	0.000124667
ENSG00000154102	C16orf74	protein_coding	-0.782938	2.62507	18.1214	2.07256e-05	0.000125918
ENSG00000128567	PODXL	protein_coding	-0.596966	3.73979	18.103	2.09274e-05	0.000127078
ENSG00000187912	CLEC17A	protein_coding	1.41533	0.152299	18.0927	2.10412e-05	0.000127704
ENSG00000156504	FAM122B	protein_coding	-0.378817	6.58725	18.0765	2.12202e-05	0.000128673
ENSG00000163870	TPRA1	protein_coding	0.422975	5.76247	18.0763	2.12226e-05	0.000128673
ENSG00000112658	SRF	protein_coding	0.364695	7.11717	18.0571	2.14377e-05	0.00012991
ENSG00000111679	PTPN6	protein_coding	0.36425	9.12872	18.0298	2.17476e-05	0.00013172
ENSG00000078177	N4BP2	protein_coding	-0.456267	5.2475	18.0288	2.17586e-05	0.00013172
ENSG00000007312	CD79B	protein_coding	0.847773	2.2498	18.0263	2.17876e-05	0.000131829
ENSG00000123066	MED13L	protein_coding	-0.36381	7.13403	18.012	2.19518e-05	0.000132754
ENSG00000254726	MEX3A	protein_coding	-0.872564	2.12056	18.0079	2.19988e-05	0.00013297
ENSG00000168172	HOOK3	protein_coding	-0.396617	6.12441	17.9969	2.21261e-05	0.000133671
ENSG00000197599	CCDC154	protein_coding	-0.762912	2.72731	17.9938	2.2162e-05	0.00013382
ENSG00000147535	PLPP5	protein_coding	-0.51444	4.42815	17.9826	2.22936e-05	0.000134546
ENSG00000027869	SH2D2A	protein_coding	0.694206	3.07461	17.9797	2.23275e-05	0.00013459
ENSG00000084774	CAD	protein_coding	-0.358546	7.60327	17.9791	2.23344e-05	0.00013459
ENSG00000178074	C2orf69	protein_coding	-0.504919	4.51364	17.979	2.2335e-05	0.00013459
ENSG00000187051	RPS19BP1	protein_coding	0.397851	6.10947	17.9754	2.23777e-05	0.000134779
ENSG00000151689	INPP1	protein_coding	0.508675	4.47773	17.9683	2.24617e-05	0.000135216
ENSG00000136450	SRSF1	protein_coding	-0.358237	7.42626	17.9397	2.28017e-05	0.000137193
ENSG00000163219	ARHGAP25	protein_coding	0.399462	6.05246	17.9178	2.30651e-05	0.000138707
ENSG00000138380	CARF	protein_coding	-0.668307	3.20944	17.9073	2.31935e-05	0.000139408
ENSG00000090861	AARS	protein_coding	-0.357413	7.80789	17.903	2.32455e-05	0.00013965
ENSG00000171206	TRIM8	protein_coding	0.388074	6.29933	17.8886	2.34219e-05	0.000140638
ENSG00000166803	PCLAF	protein_coding	-0.463358	5.0985	17.8876	2.34342e-05	0.000140641
ENSG00000164087	POC1A	protein_coding	-0.442235	5.48093	17.8849	2.34678e-05	0.000140757
ENSG00000188549	CCDC9B	protein_coding	0.461074	5.14102	17.8841	2.34774e-05	0.000140757
ENSG00000124541	RRP36	protein_coding	0.384371	6.38784	17.8768	2.35671e-05	0.000141224
ENSG00000112118	MCM3	protein_coding	-0.360837	8.90097	17.8705	2.36453e-05	0.000141568
ENSG00000132182	NUP210	protein_coding	-0.363255	9.19341	17.8703	2.36486e-05	0.000141568
ENSG00000068903	SIRT2	protein_coding	0.412283	5.86778	17.8688	2.36664e-05	0.000141603
ENSG00000055163	CYFIP2	protein_coding	0.362415	7.12886	17.8579	2.38034e-05	0.000142351
ENSG00000115425	PECR	protein_coding	-0.553531	4.05623	17.8472	2.39365e-05	0.000143075
ENSG00000175262	C1orf127	protein_coding	0.836714	2.26787	17.8349	2.40925e-05	0.000143935
ENSG00000221866	PLXNA4	protein_coding	-1.06161	1.2722	17.833	2.4116e-05	0.000144003
ENSG00000171302	CANT1	protein_coding	0.374971	6.63171	17.8265	2.41986e-05	0.000144423
ENSG00000139645	ANKRD52	protein_coding	0.36918	6.82271	17.8208	2.42716e-05	0.000144786
ENSG00000136295	TTYH3	protein_coding	0.358151	7.37093	17.7989	2.45528e-05	0.000146389
ENSG00000137103	TMEM8B	protein_coding	0.981376	1.6233	17.7768	2.4839e-05	0.000148021
ENSG00000079819	EPB41L2	protein_coding	-0.360053	7.19618	17.7474	2.5226e-05	0.000150252
ENSG00000158109	TPRG1L	protein_coding	0.521142	4.31935	17.7297	2.5462e-05	0.000151581
ENSG00000084731	KIF3C	protein_coding	0.478044	4.82605	17.7213	2.5575e-05	0.000152177
ENSG00000179029	TMEM107	protein_coding	-0.568959	3.90568	17.7174	2.56274e-05	0.000152412
ENSG00000224877	NDUFAF8	protein_coding	0.447833	5.34099	17.7059	2.57827e-05	0.000153186
ENSG00000068079	IFI35	protein_coding	0.474334	4.88341	17.7058	2.57833e-05	0.000153186
ENSG00000182670	TTC3	protein_coding	-0.35763	7.30921	17.6939	2.59463e-05	0.000154076
ENSG00000114541	FRMD4B	protein_coding	0.403542	5.94787	17.6923	2.59679e-05	0.000154128
ENSG00000170425	ADORA2B	protein_coding	0.510116	4.41664	17.6774	2.61712e-05	0.000155256
ENSG00000156471	PTDSS1	protein_coding	-0.355689	8.49879	17.6744	2.62133e-05	0.000155428
ENSG00000105866	SP4	protein_coding	-0.593862	3.697	17.6698	2.62759e-05	0.000155721
ENSG00000139514	SLC7A1	protein_coding	-0.357603	7.30033	17.6669	2.63164e-05	0.000155883
ENSG00000085465	OVGP1	protein_coding	1.09618	1.10199	17.6607	2.64028e-05	0.000156317
[truncated: 9,836 more rows]
