# Supplementary material for: SOD1 is a synthetic-lethal target in PPM1D-mutant leukemia cells
Source: eLife. 2024 Jun 18;12:RP91611. doi: 10.7554/eLife.91611 (PMC11186636; doi:10.7554/eLife.91611)
Supplement: Figure 4—source data 2. [file elife-91611-fig4-data2.xlsx]

## Sheet: EV
feature	p_value	fdr	fold_change	log2fold_change	WT_EV_10h_mean	PPM1D_EV_10h_mean	WT_EV_10h_sd	PPM1D_EV_10h_sd	value_D10_MUTEV_1	value_D10_MUTEV_2	value_D10_MUTEV_3	value_D10_MUTEV_4	value_D10_WTEV_1	value_D10_WTEV_2	value_D10_WTEV_3	value_D10_WTEV_4
p-Akt(S473)	0.0240559	0.0403144	37.3235	5.22201	0	5.22201	0	3.48313	6.83905	6.93969	7.10931	0	0	0	0	0
p21	1.46128e-08	5.91818e-07	19.48	4.28392	8.83516	13.1191	0.128264	0.166629	13.1795	13.064	12.9207	13.3121	8.69192	8.97943	8.77131	8.89798
ATR	0.12768	0.188037	9.41045	3.23426	1.02476	4.25903	2.04953	3.0336	6.28577	0	4.17733	6.57302	0	0	0	4.09906
Integrinb1	9.14717e-09	4.77109e-07	8.26047	3.04622	10.0013	13.0475	0.0746642	0.116371	13.1603	12.939	12.9556	13.1353	10.0231	9.98095	9.91162	10.0896
LRP6	2.06348e-06	1.47478e-05	7.42796	2.89297	8.6208	11.5138	0.304607	0.116772	11.4291	11.6521	11.5681	11.4058	8.66125	8.44906	9.03185	8.34104
LC3A	2.05994e-07	2.66827e-06	5.19532	2.37721	8.99425	11.3715	0.0452461	0.176046	11.2398	11.605	11.4097	11.2313	8.97787	9.02777	9.03364	8.9377
ERa	6.77288e-05	0.000253202	3.75441	1.90858	7.2275	9.13608	0.368676	0.134225	9.24994	9.23332	8.96216	9.09891	6.79969	7.51572	7.55413	7.04045
p70S6K	2.21059e-07	2.66827e-06	3.64544	1.86609	10.9292	12.7953	0.114882	0.0874632	12.8378	12.6672	12.8148	12.8614	10.9323	11.0705	10.7892	10.9249
Notch1	9.02484e-08	1.82753e-06	3.46635	1.79342	9.95003	11.7434	0.111923	0.0415804	11.7286	11.6974	11.7962	11.7515	10.0328	9.87805	9.83173	10.0575
Vimentin	0.00766205	0.0143221	2.79561	1.48317	9.88012	11.3633	0.605307	0.449059	11.0062	12.0207	11.2229	11.2033	9.8867	9.20886	10.6749	9.75003
p-p44/42MAPK(Erk1/2)(T202/Y204)	0.00185903	0.00418282	2.70159	1.43381	10.4249	11.8587	0.538094	0.0709596	11.7983	11.8552	11.9592	11.8221	10.1712	11.2187	10.2738	10.0359
FoxO1	1.96722e-07	2.66827e-06	2.68128	1.42292	9.83635	11.2593	0.0665189	0.0850348	11.1688	11.3711	11.2684	11.2289	9.78045	9.91853	9.86227	9.78415
Integrina5	1.18707e-05	5.54729e-05	2.58776	1.3717	11.3518	12.7235	0.154913	0.139444	12.7971	12.5445	12.6886	12.8637	11.427	11.4188	11.1198	11.4414
Beta-Catenin	0.000109417	0.000374483	2.58366	1.36941	6.23319	7.6026	0.242192	0.187692	7.46817	7.87072	7.59405	7.47749	6.06679	5.99359	6.50122	6.37115
Chk2_M_V	9.80598e-08	1.83296e-06	2.34274	1.2282	11.7804	13.0086	0.0415969	0.0717239	13.0055	12.9088	13.0507	13.0695	11.762	11.8426	11.7549	11.7622
p-RafB(S445)	9.22184e-06	4.57328e-05	2.23693	1.16152	10.5869	11.7484	0.144239	0.0880924	11.7903	11.626	11.7483	11.8293	10.573	10.7898	10.4524	10.5325
BRaf	2.91076e-06	1.96476e-05	2.17765	1.12277	11.0676	12.1903	0.110508	0.076169	12.23	12.1048	12.1522	12.2743	11.0497	11.1071	10.9254	11.1881
IkB_ (L35A5) (Amino-terminal Antigen)_M_V	3.45561e-07	3.81688e-06	2.08553	1.06041	11.8138	12.8743	0.0531828	0.0706708	12.9212	12.7774	12.8664	12.932	11.7967	11.7553	11.8825	11.8209
SRC-1_M_V	0.00127867	0.00296196	1.95275	0.965507	10.6232	11.5887	0.116061	0.319287	12.0615	11.3621	11.4837	11.4475	10.5925	10.7544	10.4802	10.6657
KLF4	1.55265e-05	7.11874e-05	1.93007	0.948656	10.7941	11.7428	0.0366267	0.146446	11.8797	11.5422	11.7338	11.8155	10.7697	10.8478	10.7718	10.7874
TSC2	9.95173e-06	4.83654e-05	1.92525	0.945047	12.6304	13.5754	0.101193	0.0957603	13.5481	13.4758	13.5726	13.7051	12.5948	12.7634	12.5224	12.6409
Stat6	3.02456e-06	1.9864e-05	1.91045	0.933909	12.5297	13.4636	0.075915	0.0828466	13.4173	13.4703	13.5773	13.3896	12.5413	12.6163	12.4314	12.5299
JMJD2B	1.59444e-05	7.17498e-05	1.90635	0.930812	12.6265	13.5573	0.0342184	0.144809	13.4163	13.7263	13.4593	13.6272	12.6041	12.6418	12.5929	12.6671
p44/42MAPK(Erk1/2)	2.7707e-05	0.000112213	1.89949	0.925612	12.3629	13.2885	0.136653	0.088468	13.3137	13.1675	13.2938	13.3789	12.2833	12.5675	12.2994	12.3013
p27/KIP1(C-term)	3.1826e-06	2.03519e-05	1.89721	0.923878	8.73431	9.65819	0.101231	0.0482159	9.59563	9.70779	9.68074	9.64858	8.81995	8.79766	8.59541	8.72422
c-Met	1.37307e-06	1.07631e-05	1.86351	0.898019	10.4947	11.3927	0.026616	0.0906926	11.2929	11.376	11.5128	11.3891	10.4953	10.5321	10.4742	10.4771
Akt	3.76486e-07	3.92397e-06	1.80411	0.851287	12.2071	13.0584	0.0632764	0.0344259	13.0595	13.019	13.1028	13.0524	12.1633	12.2747	12.144	12.2465
CBP	2.37278e-05	0.000101155	1.61256	0.689354	11.5387	12.2281	0.0510019	0.106438	12.2574	12.3652	12.1294	12.1604	11.572	11.4873	11.5919	11.5037
Integrinb4	0.0296307	0.0489814	1.6092	0.686348	7.74846	8.43481	0.367796	0.314034	8.67727	7.97422	8.52005	8.56769	7.6849	8.08778	7.258	7.96317
JMJD2A	2.60954e-06	1.81177e-05	1.54057	0.623463	11.9794	12.6028	0.0264391	0.0682148	12.5674	12.6727	12.5255	12.6457	11.9594	12.0155	11.9598	11.9827
MEK6	9.49218e-05	0.000339206	1.53443	0.617702	10.065	10.6827	0.0936541	0.0969156	10.5953	10.8212	10.6523	10.6618	10.0005	10.1402	10.1503	9.96893
Smad2	0.000220776	0.000670607	1.5207	0.604734	12.5885	13.1932	0.125765	0.0878808	13.3035	13.1055	13.2211	13.1427	12.5334	12.7483	12.4543	12.6179
p-PDGFRa(Y754)	5.72541e-06	3.23552e-05	1.50388	0.588686	11.4847	12.0734	0.0749425	0.0248569	12.0802	12.0404	12.1002	12.0728	11.5564	11.513	11.3804	11.4891
GLS1	0.00280915	0.00593585	1.50087	0.585799	13.6669	14.2527	0.170644	0.169943	14.4241	14.0207	14.2551	14.3111	13.7022	13.8778	13.4684	13.6194
Bax	2.88627e-08	8.31191e-07	1.49411	0.579284	13.1014	13.6807	0.0170774	0.0269001	13.6567	13.6586	13.6989	13.7085	13.094	13.1251	13.0853	13.1011
Ret	0.00437858	0.00874498	1.47455	0.560273	11.951	12.5113	0.173884	0.18296	12.6621	12.3242	12.3845	12.6743	11.9497	12.182	11.7621	11.9102
PTEN	0.00139546	0.00319902	1.47336	0.559114	13.9208	14.4799	0.146394	0.136402	14.5804	14.32	14.4136	14.6055	13.923	14.126	13.8352	13.7989
PKM1/2	0.000773209	0.00195719	1.44962	0.535679	13.2901	13.8257	0.0925369	0.14407	13.9881	13.6834	13.7279	13.9037	13.1934	13.3282	13.2381	13.4005
p-mTOR(S2448)	2.7304e-05	0.000112213	1.44171	0.52778	11.9178	12.4456	0.0263268	0.088765	12.5117	12.4717	12.4841	12.3148	11.8808	11.9407	11.9181	11.9316
PRAS40	0.0178699	0.0305802	1.43543	0.521486	12.1151	12.6366	0.202823	0.251022	12.4628	13.0072	12.5704	12.5058	12.0091	11.9926	12.4178	12.0408
SirT6	1.04376e-05	4.97323e-05	1.43014	0.516155	12.1199	12.636	0.0584428	0.049698	12.6923	12.5731	12.628	12.6507	12.1406	12.1927	12.0649	12.0812
Claudin-1	0.0683255	0.10643	1.40481	0.490379	10.5835	11.0739	0.335916	0.287354	11.2401	10.6648	11.0875	11.3032	10.5613	11.0136	10.1927	10.5666
HDAC4	0.00126799	0.00296196	1.40432	0.489871	12.3712	12.861	0.132262	0.110098	12.9261	12.7299	12.8143	12.9739	12.3873	12.4617	12.1794	12.4563
MEK1	6.17316e-07	5.36864e-06	1.39607	0.481374	14.6177	15.0991	0.0103395	0.0430456	15.0593	15.1471	15.1236	15.0664	14.6305	14.6217	14.6105	14.6082
DNA-PKcs	0.000279221	0.000817479	1.39103	0.476156	11.712	12.1881	0.0787626	0.0984232	12.1454	12.3328	12.161	12.1134	11.7145	11.6305	11.818	11.685
p-MEK1/2(S217/221)	5.72704e-05	0.0002209	1.38855	0.473582	13.5078	13.9814	0.0852277	0.0408902	13.9612	14.0099	14.0206	13.9339	13.477	13.6124	13.411	13.5308
p-Tuberin/TSC2(T1462)	0.0333881	0.0545037	1.38663	0.471587	8.60231	9.0739	0.132316	0.316717	9.21819	8.62461	9.10042	9.35237	8.66839	8.7281	8.42293	8.58982
JARID1C	3.35667e-05	0.000133716	1.38256	0.467339	13.5485	14.0158	0.0441951	0.0725796	13.969	14.0999	13.9431	14.0513	13.5215	13.6136	13.5382	13.5205
PI3Kp85	0.00861891	0.0159878	1.37723	0.461768	10.2959	10.7577	0.184804	0.154502	10.8117	10.5292	10.8197	10.87	10.3356	10.4248	10.0244	10.3987
p-PTEN(S380)	0.000217064	0.000667679	1.36396	0.447806	12.5473	12.9951	0.0956453	0.0606721	13.0025	13.0694	12.9216	12.9869	12.4445	12.6181	12.6386	12.4879
p-AMPKa1(S485)	0.0116298	0.0203313	1.35766	0.441126	12.4852	12.9263	0.180733	0.167438	12.9935	12.6999	12.9176	13.0943	12.3687	12.7535	12.3882	12.4303
Bak	0.000338856	0.000946459	1.34545	0.428084	12.8533	13.2814	0.051729	0.105394	13.2463	13.1616	13.4124	13.3052	12.8873	12.905	12.7943	12.8266
Jak1	2.54263e-05	0.000106527	1.34335	0.425837	12.4306	12.8565	0.0235611	0.0699238	12.8552	12.7771	12.8463	12.9473	12.4114	12.4288	12.4181	12.4643
Chk1	0.00506656	0.00984939	1.31463	0.394658	14.4854	14.88	0.158899	0.0914986	14.9684	14.7544	14.8782	14.9191	14.4399	14.6249	14.2806	14.5961
p-SHC(Y317)	0.000999486	0.00245328	1.3087	0.388138	9.06411	9.45225	0.0946166	0.0895297	9.52216	9.32579	9.50854	9.4525	8.92497	9.13687	9.09754	9.09705
IDH1	0.000171751	0.000535071	1.30733	0.38662	13.1694	13.556	0.0726165	0.0593021	13.5468	13.4758	13.6032	13.5984	13.1669	13.243	13.0711	13.1966
ASH2	7.68514e-06	3.97338e-05	1.29267	0.370359	12.7694	13.1398	0.0321673	0.041156	13.1598	13.1869	13.1162	13.0962	12.7798	12.7833	12.7927	12.7218
PKM2	0.0105351	0.0188237	1.28508	0.361855	12.5884	12.9502	0.180946	0.0792621	12.9786	12.8339	12.9762	13.0121	12.5895	12.68	12.3352	12.7488
AMPKa	3.72658e-06	2.2639e-05	1.28052	0.356734	10.7404	11.0971	0.0298079	0.033004	11.0667	11.1437	11.0935	11.0847	10.7761	10.7124	10.7536	10.7196
p-p70S6K(S371)	0.129394	0.189415	1.25973	0.333115	12.7234	13.0565	0.325388	0.194604	13.2202	12.7773	13.0815	13.1471	12.855	13.054	12.2871	12.6975
HER2/c-ErbB2	0.00471769	0.00932032	1.25965	0.333021	9.70815	10.0412	0.128102	0.0825627	10.0249	10.1589	9.96629	10.0145	9.65552	9.63914	9.89993	9.63801
ALDH2	0.00213595	0.00463425	0.797047	-0.327262	10.3907	10.0635	0.0918901	0.0881552	10.1039	9.94863	10.0472	10.1541	10.4099	10.5066	10.2885	10.3579
SMARCE1/BAF57	0.000373645	0.00103177	0.791041	-0.338176	11.6442	11.3061	0.053091	0.0780826	11.3707	11.3226	11.338	11.1929	11.7178	11.5988	11.6473	11.6131
p-ALK(Y1604)	0.016511	0.0284551	0.785555	-0.348216	9.27736	8.92914	0.140697	0.157728	8.93215	8.85171	9.14782	8.78488	9.25785	9.26185	9.12434	9.46538
IKKb	0.000458893	0.0012254	0.781648	-0.355409	14.6288	14.2734	0.0743707	0.0713491	14.3591	14.1844	14.2757	14.2745	14.6462	14.6939	14.5218	14.6535
SRC-3_M_V	0.00302426	0.00633531	0.772248	-0.372864	12.0389	11.6661	0.120985	0.0978582	11.781	11.5562	11.7049	11.6221	12.0227	12.155	11.8768	12.1013
Bad	0.00976261	0.017782	0.769534	-0.377944	11.0699	10.692	0.132613	0.153398	10.5754	10.9105	10.686	10.596	11.1326	10.9188	11.2192	11.009
p-p70S6K(T389)	0.00199486	0.00440682	0.759972	-0.395981	9.48687	9.09089	0.114182	0.100332	8.9833	9.21473	9.12249	9.04303	9.46403	9.34177	9.61229	9.52938
LSD1	0.00612334	0.0118093	0.757769	-0.400171	14.2313	13.8311	0.12729	0.145905	13.9346	13.6493	13.778	13.9626	14.2286	14.3903	14.0786	14.2278
Stat3	0.000272542	0.000807656	0.756558	-0.402477	13.7263	13.3238	0.102743	0.0264145	13.3387	13.2849	13.3417	13.3299	13.5921	13.8422	13.7297	13.7411
ULK1	0.00365154	0.00751969	0.752306	-0.410609	14.2938	13.8832	0.0921593	0.152424	13.844	13.7141	13.8926	14.0819	14.3103	14.3825	14.1643	14.3179
VEGFR2	0.000124202	0.000413439	0.752	-0.411196	13.9665	13.5553	0.0841796	0.0420594	13.5268	13.5552	13.6149	13.5245	13.9271	13.8841	14.0799	13.975
SMARCC1/BAF55	9.30611e-05	0.00033752	0.740031	-0.434343	15.3494	14.9151	0.0349872	0.0877151	14.9982	14.7913	14.9319	14.9389	15.3998	15.3425	15.3363	15.3192
Atg7	0.000290804	0.000841254	0.738636	-0.437064	11.3498	10.9127	0.084424	0.080378	10.7967	10.9777	10.924	10.9524	11.2496	11.4457	11.3193	11.3845
HDAC3	0.000670724	0.00171564	0.706996	-0.500226	11.3351	10.8349	0.0992805	0.119909	10.8205	10.7558	11.0087	10.7545	11.3682	11.378	11.1881	11.406
BRCA2	0.00113651	0.00273438	0.706593	-0.501048	12.7812	12.2802	0.116135	0.127336	12.3442	12.0937	12.3751	12.3077	12.8098	12.7978	12.6202	12.8971
G9a/EHMT2	6.29159e-06	3.47467e-05	0.70588	-0.502505	9.50104	8.99853	0.0548775	0.0409825	9.02709	8.98927	9.03333	8.94443	9.48704	9.57023	9.43789	9.50898
p-Src(Y527)	8.4313e-06	4.26835e-05	0.699932	-0.514713	10.5481	10.0334	0.0696649	0.0242206	10.0029	10.0272	10.0438	10.0596	10.545	10.6444	10.5231	10.4799
p-Stat3(S727)	0.00127986	0.00296196	0.683191	-0.549638	9.70948	9.15985	0.167119	0.0974034	9.13944	9.03803	9.27029	9.19163	9.69463	9.94196	9.54664	9.65471
Cyclin C	3.86113e-06	2.28842e-05	0.672252	-0.572925	11.3021	10.7292	0.0387469	0.060514	10.7762	10.7282	10.6441	10.7683	11.2637	11.2744	11.3414	11.3289
PDK1	9.81344e-05	0.000345353	0.656056	-0.60811	14.9719	14.3638	0.0819708	0.105326	14.3622	14.2242	14.3907	14.4781	15.0382	15.038	14.8695	14.9418
FoxK2	0.000469791	0.00124086	0.652771	-0.61535	11.1245	10.5091	0.0834499	0.158601	10.6761	10.3686	10.3786	10.6131	11.1021	11.2427	11.0464	11.1067
PHGDH	0.00205463	0.00449796	0.645916	-0.630581	12.9594	12.3288	0.193015	0.148409	12.396	12.1063	12.4058	12.4071	12.9879	13.172	12.7034	12.9742
SCD1	0.000398169	0.00108713	0.634196	-0.657	9.13267	8.47567	0.13389	0.128527	8.40647	8.34001	8.62998	8.52622	9.29586	9.03183	9.01478	9.18819
LDHA	0.00980569	0.017782	0.631791	-0.66248	13.2088	12.5463	0.233423	0.268512	12.6649	12.1928	12.5062	12.8214	13.175	13.4922	12.9246	13.2434
p-p38(T180/Y182)	6.73221e-05	0.000253202	0.6317	-0.662688	14.6505	13.9878	0.103575	0.0882687	13.9928	13.921	14.1108	13.9266	14.5311	14.7827	14.6575	14.6307
STAT2	1.61607e-07	2.66827e-06	0.630234	-0.666042	15.4125	14.7464	0.0342014	0.0349409	14.7856	14.711	14.7237	14.7654	15.3734	15.4478	15.4335	15.3953
Atg3	0.00101387	0.00246369	0.627299	-0.672775	12.9012	12.2284	0.181733	0.135024	12.3087	12.0336	12.2423	12.329	12.9423	13.0745	12.645	12.943
STAT4	0.00989758	0.0178156	0.615981	-0.699041	7.63328	6.93424	0.158095	0.341391	6.8499	7.28559	6.49788	7.10359	7.53959	7.76785	7.76656	7.45912
p-AMPKa(T172)	0.000135023	0.000443388	0.585636	-0.771924	14.2017	13.4298	0.119635	0.133557	13.5571	13.2419	13.4508	13.4694	14.2537	14.3242	14.0438	14.1851
DNMT3B	0.00439049	0.00874498	0.585365	-0.772592	9.22839	8.4558	0.113279	0.329321	7.98471	8.74508	8.50654	8.58686	9.09001	9.30275	9.33711	9.1837
c-Myc	0.000608064	0.00157191	0.571606	-0.806908	13.6364	12.8295	0.225554	0.0995603	12.9119	12.9186	12.7315	12.756	13.8043	13.3077	13.7583	13.6755
Integrina4	9.94843e-05	0.000345353	0.568141	-0.815678	13.4815	12.6659	0.162924	0.0752288	12.7457	12.5775	12.6329	12.7072	13.6125	13.4947	13.2484	13.5706
PHF2	3.37604e-06	2.10353e-05	0.567536	-0.817216	14.2793	13.4621	0.0904031	0.0431697	13.5267	13.4387	13.4439	13.4389	14.4072	14.279	14.2139	14.217
p-4E-BP1(T37/T46)	4.52157e-05	0.000177216	0.567002	-0.818574	14.3035	13.4849	0.0665301	0.141955	13.5321	13.6559	13.4267	13.3249	14.2624	14.233	14.3448	14.3736
p-c-Myc(T58)	7.56896e-05	0.000278675	0.565043	-0.823568	13.9626	13.1391	0.141523	0.098883	13.2609	13.1108	13.1605	13.0241	13.9796	14.1539	13.8306	13.8864
p-ULK1(S757)	4.64998e-06	2.69034e-05	0.538068	-0.894139	12.1172	11.223	0.0834636	0.0801953	11.1942	11.3419	11.1898	11.1662	12.1594	12.006	12.1049	12.1984
p-Bad(S112)	0.000171232	0.000535071	0.538001	-0.89432	12.2272	11.3329	0.201059	0.0809767	11.314	11.413	11.3766	11.2281	12.0769	12.5213	12.1855	12.125
PCAF	4.48613e-08	9.91027e-07	0.491175	-1.02569	9.36568	8.33999	0.0484201	0.0366713	8.33187	8.32306	8.31147	8.39355	9.41912	9.3942	9.32599	9.32339
AuroraA/AIK	1.70683e-05	7.4064e-05	0.48558	-1.04222	11.815	10.7727	0.131442	0.105545	10.8128	10.6184	10.8028	10.857	11.846	11.9089	11.6216	11.8834
PI3Kp110a	1.72606e-07	2.66827e-06	0.461791	-1.11469	10.2743	9.15966	0.0344212	0.0752382	9.1	9.09236	9.24356	9.20272	10.2912	10.2747	10.2263	10.3053
p-Chk2(S33/35)	0.000167087	0.000534239	0.442642	-1.17579	9.41372	8.23793	0.204677	0.196482	8.11622	8.02679	8.42701	8.38171	9.37661	9.70559	9.34406	9.22862
c-Fos	1.48296e-06	1.12613e-05	0.41595	-1.26552	13.4757	12.2101	0.121361	0.0590014	12.1481	12.2392	12.2777	12.1756	13.577	13.3527	13.3901	13.5828
Kit-c	0.0334537	0.0545037	0.386533	-1.37134	8.4564	7.08506	0.461661	0.885554	5.9596	7.76217	7.82255	6.79594	8.60422	7.85583	8.96059	8.40497
Ki67	2.09128e-08	7.25972e-07	0.385723	-1.37436	15.2635	13.8891	0.0345862	0.0627256	13.9058	13.8744	13.8129	13.9633	15.2988	15.2757	15.2627	15.2167
Annexin1	3.87553e-07	3.92397e-06	0.373117	-1.4223	12.6313	11.209	0.0489333	0.1106	11.2615	11.0508	11.2211	11.3026	12.6595	12.6577	12.5582	12.6498
RRM2	4.79578e-07	4.6615e-06	0.372461	-1.42484	13.1477	11.7228	0.110638	0.0594113	11.704	11.6653	11.8058	11.7162	13.0849	13.0746	13.1202	13.311
p-IKK a/b (Ser176/180)	0.00014936	0.000483926	0.365418	-1.45238	10.5531	9.10069	0.329937	0.0955585	8.96722	9.11612	9.19416	9.12525	10.3817	11.0134	10.261	10.5562
p-Rb(S780)	3.95519e-08	9.6111e-07	0.362715	-1.46309	14.4074	12.9443	0.0624825	0.0573819	12.9632	12.859	12.9818	12.9733	14.4513	14.4159	14.3166	14.4458
DEPTOR/DEPDC6	1.05149e-06	8.51709e-06	0.330063	-1.59919	14.0315	12.4323	0.111335	0.116155	12.5122	12.2666	12.4369	12.5136	14.0237	14.1485	13.8834	14.0705
p-SAPK/JNK(T183/Y185)	0.000302833	0.000865747	0.299338	-1.74015	15.0576	13.3175	0.437077	0.166031	13.3262	13.0807	13.448	13.415	14.8893	15.6973	14.7113	14.9326
Cox-2_M_V	3.07849e-08	8.31191e-07	0.243486	-2.03809	14.0256	11.9875	0.107543	0.0357179	11.9781	11.9462	12.0321	11.9937	14.156	14.0374	13.8935	14.0156
p-NF-kB p65 (Ser536)	7.45128e-06	3.93622e-05	0.233874	-2.09619	11.7946	9.6984	0.289938	0.0492405	9.62956	9.70347	9.7457	9.71488	11.6023	12.1337	11.5097	11.9326
p-Stat1(Y701)	5.11597e-07	4.78146e-06	0.222767	-2.16639	10.7618	8.59543	0.139834	0.133065	8.60719	8.64716	8.40829	8.71906	10.6558	10.9675	10.7038	10.7202
Stat5a	9.81706e-09	4.77109e-07	0.219434	-2.18814	12.1145	9.92638	0.0786639	0.0625427	9.92617	9.85603	10.008	9.9153	12.1532	12.1155	12.0044	12.1849
RB1	2.10001e-09	2.38873e-07	0.215587	-2.21366	12.9073	10.6937	0.0281151	0.0733795	10.7507	10.7295	10.7077	10.5868	12.9245	12.9367	12.892	12.8761
c-Jun	2.30592e-07	2.66827e-06	0.208942	-2.25883	12.864	10.6052	0.109119	0.138115	10.507	10.5497	10.5543	10.8099	12.8799	12.7385	12.8361	13.0017
p-Rb(S807/811)	2.94905e-09	2.38873e-07	0.195776	-2.35272	13.0081	10.6554	0.0789698	0.0397039	10.7033	10.626	10.6726	10.6198	12.9736	13.0886	12.9145	13.0559
Stat1	1.80787e-06	1.33125e-05	0.18395	-2.44262	14.9929	12.5503	0.235622	0.130481	12.5244	12.3761	12.6515	12.6494	15.0707	15.1493	14.6428	15.109
p-c-Fos(S32)	2.01554e-09	2.38873e-07	0.183211	-2.44842	13.2902	10.8418	0.0450791	0.0736156	10.7527	10.9215	10.8774	10.8155	13.2584	13.2475	13.3432	13.3115
Caspase-3(Asp175)	0.00373519	0.00762732	0.167017	-2.58194	8.4769	5.89496	0.320332	1.07873	5.49507	4.55382	6.85708	6.67388	8.25334	8.87504	8.59467	8.18454
cleaved Caspase-7	7.15082e-06	3.86144e-05	0.165072	-2.59883	12.7364	10.1376	0.360231	0.0362702	10.1494	10.0838	10.1625	10.1546	12.4891	13.2704	12.6238	12.5623
p-c-Jun(S63)	1.69868e-05	7.4064e-05	0.139802	-2.83854	11.2511	8.41257	0.244677	0.388038	8.32073	8.88369	8.49624	7.94961	11.1376	11.0329	11.596	11.238
PDGFRb	7.43171e-07	6.22726e-06	0.128736	-2.95751	11.0242	8.06671	0.0858472	0.267178	8.06847	7.78291	7.99114	8.42433	10.979	11.1011	10.9258	11.091
p-p53(S15)	1.80986e-07	2.66827e-06	0.0803353	-3.63782	12.0266	8.38875	0.233697	0.13952	8.21679	8.53309	8.34086	8.46426	11.8066	12.3565	11.989	11.9542
p53	2.15572e-07	2.66827e-06	0.0600639	-4.05736	12.7997	8.74238	0.193284	0.245699	8.49153	9.0473	8.82428	8.6064	12.8931	12.5114	12.9222	12.8722
Axl	6.18609e-07	5.36864e-06	0.0526833	-4.24651	12.3167	8.07017	0.110672	0.374668	8.19108	7.53663	8.14103	8.41196	12.3158	12.1622	12.4146	12.3741
FGFR1	0.00267803	0.00570842	0.00873807	-6.83847	9.21222	2.37375	0.107927	2.78225	0	5.33225	0	4.16277	9.07217	9.23979	9.33266	9.20428

## Sheet: SOD1 KO
feature	p_value	fdr	fold_change	log2fold_change	WT.SOD1KO_10h_mean	PPM1D.SOD1KO_10h_mean	WT.SOD1KO_10h_sd	PPM1D.SOD1KO_10h_sd	value_D10_MUTSOD_1	value_D10_MUTSOD_2	value_D10_MUTSOD_3	value_D10_MUTSOD_4	value_D10_WTSOD_1	value_D10_WTSOD_2	value_D10_WTSOD_3	value_D10_WTSOD_4
p-Akt(S473)	0.000932026	0.00334989	143.298	7.16288	1.15206	8.31493	2.30411	0.563803	7.92244	7.74674	8.70791	8.88264	0	0	0	4.60822
p21	0.0271575	0.0596023	122.303	6.93432	7.14363	14.078	4.77214	0.136441	14.049	14.2571	14.0792	13.9266	9.40232	0	9.94351	9.22869
PR_M_V	0.0207943	0.048358	26.7163	4.73965	1.38749	6.12714	2.77498	1.25602	6.39417	7.78159	5.36412	4.96868	0	0	5.54996	0
p-EGFR(Y1045)	0.0244841	0.0552443	25.789	4.68869	0	4.68869	0	3.1417	6.48948	5.80528	0	6.45998	0	0	0	0
p-HER2/ErbB2(Y1248)	0.0577546	0.115509	16.9914	4.08673	0.686008	4.77274	1.37202	3.21035	6.5359	6.77881	0	5.77625	0	0	0	2.74403
LRP6	0.00014219	0.000750277	15.2611	3.93179	7.59555	11.5273	0.917783	0.0854542	11.4689	11.585	11.6149	11.4407	6.82444	8.84486	6.99781	7.71512
Caveolin-1	0.0469478	0.094659	13.891	3.79608	1.43451	5.23059	2.86903	1.01998	5.09502	5.84141	6.13678	3.84914	0	0	0	5.73805
Integrinb1	8.98681e-08	5.57182e-06	7.80356	2.96413	10.5861	13.5502	0.188237	0.0587678	13.4633	13.593	13.5719	13.5727	10.8582	10.5161	10.5442	10.426
FoxO1	3.59935e-07	6.95622e-06	4.3622	2.12506	9.31758	11.4426	0.175412	0.0328731	11.4397	11.422	11.4189	11.49	9.06635	9.47065	9.34496	9.38837
LC3A	0.00269871	0.00806361	4.28135	2.09807	9.5384	11.6365	0.84437	0.138009	11.6015	11.837	11.5222	11.5851	9.24732	10.7439	9.38369	8.77874
p70S6K	1.24731e-06	1.71851e-05	4.05444	2.0195	10.4468	12.4663	0.188743	0.0900655	12.4148	12.4314	12.601	12.4181	10.2428	10.6386	10.3338	10.5722
Beta-Catenin	0.00899384	0.0243126	3.52884	1.81919	5.84574	7.66494	0.942237	0.1736	7.58677	7.92313	7.6017	7.54814	5.12784	7.18206	5.82902	5.24405
p-p44/42MAPK(Erk1/2)(T202/Y204)	0.000267946	0.0012638	3.39337	1.76272	11.1772	12.9399	0.400099	0.233363	13.0503	13.2162	12.7416	12.7514	10.8705	11.1003	11.7606	10.9774
Notch1	8.01502e-08	5.57182e-06	3.18467	1.67115	9.99194	11.6631	0.0393896	0.101704	11.668	11.5245	11.7679	11.6919	10.0327	9.96964	10.0168	9.94861
Chk2_M_V	0.000277655	0.0012638	3.03168	1.60012	11.4033	13.0034	0.353755	0.232255	12.8372	13.1706	13.2334	12.7725	11.2631	11.0239	11.8591	11.467
BRaf	1.14918e-05	9.49992e-05	2.95522	1.56327	10.7841	12.3474	0.209594	0.108946	12.3586	12.1916	12.3999	12.4394	10.5378	11.0359	10.7195	10.8433
IkB_ (L35A5) (Amino-terminal Antigen)_M_V	0.00226532	0.00693579	2.88903	1.53059	11.5575	13.0881	0.38585	0.462843	12.6072	13.5552	13.4057	12.7843	11.3654	11.1659	12.0568	11.642
Integrina5	0.000203219	0.00102854	2.83429	1.50299	11.1523	12.6553	0.299415	0.22688	12.6571	12.3996	12.9508	12.6137	11.5359	10.9654	10.8702	11.2377
p27/KIP1(C-term)	0.000100638	0.00056723	2.68293	1.42381	8.12905	9.55285	0.303887	0.0785964	9.60874	9.4486	9.61809	9.53599	8.08045	7.71934	8.32817	8.38822
p-RafB(S445)	5.22615e-06	5.40036e-05	2.65001	1.406	10.2988	11.7048	0.155818	0.100961	11.5548	11.7619	11.7671	11.7354	10.0993	10.472	10.2751	10.3486
Stat6	1.53665e-05	0.000122932	2.584	1.36961	12.0129	13.3825	0.203983	0.0756341	13.3426	13.3044	13.4769	13.4062	12.0553	11.7617	11.9794	12.2554
TSC2	2.91577e-06	3.61556e-05	2.4809	1.31086	12.0804	13.3913	0.15168	0.0395254	13.3458	13.4135	13.4333	13.3724	11.891	12.051	12.1251	12.2544
JMJD2A	0.00034886	0.0014868	2.35467	1.23553	11.6864	12.922	0.255666	0.225129	12.7537	13.0702	13.1573	12.7066	11.3395	11.8791	11.8791	11.648
Vimentin	0.000363845	0.0014868	2.35097	1.23326	11.0637	12.297	0.204417	0.275012	12.2802	12.6343	11.9615	12.312	11.0828	11.1059	11.2794	10.7868
Akt	1.8736e-05	0.000145204	2.33188	1.22149	11.7065	12.928	0.1475	0.136209	12.7889	12.8599	13.103	12.9603	11.5705	11.626	11.7229	11.9066
p-mTOR(S2448)	4.68456e-07	7.74513e-06	2.28295	1.1909	11.8404	13.0313	0.0483707	0.0926856	13.0473	13.0408	13.1306	12.9066	11.8654	11.78	11.8255	11.8907
p44/42MAPK(Erk1/2)	4.9892e-05	0.00030933	2.21279	1.14587	11.6561	12.802	0.168918	0.145989	12.7292	12.6577	12.995	12.826	11.6969	11.6062	11.4589	11.8624
JMJD2B	4.21032e-07	7.45828e-06	2.13559	1.09463	12.4079	13.5026	0.0576522	0.0747327	13.4789	13.4975	13.6057	13.4282	12.3707	12.4223	12.3556	12.4831
p-GSK-3a/b (Ser21/9)	0.000564207	0.0021863	2.12937	1.09043	11.1739	12.2643	0.314251	0.095906	12.3432	12.201	12.3494	12.1637	11.148	10.7767	11.23	11.5408
p-Pras40(T246)	0.0192993	0.0469237	2.10034	1.07063	8.19098	9.26161	0.455176	0.498848	9.11963	10.0009	8.98974	8.93616	7.93552	7.90412	8.86646	8.05783
p-MEK1/2(S217/221)	3.84037e-06	4.5353e-05	2.02901	1.02078	13.0497	14.0705	0.0881161	0.0927143	14.0121	14.115	14.1782	13.9767	12.9465	13.0086	13.1379	13.106
CBP	0.000105175	0.00057963	1.97861	0.984488	11.0506	12.0351	0.176196	0.129622	11.9728	11.9187	12.2166	12.0323	10.9797	11.0572	10.8754	11.2901
PRAS40	0.0307481	0.066309	1.93795	0.954535	11.7432	12.6978	0.495277	0.464971	12.3133	13.3745	12.5492	12.554	11.446	11.3725	12.4561	11.6983
c-Met	0.00035772	0.0014868	1.90556	0.930215	9.78725	10.7175	0.192311	0.171478	10.5673	10.6117	10.9497	10.7412	9.91866	9.50608	9.82084	9.90343
SRC-1_M_V	0.000604206	0.00223646	1.86962	0.902745	10.2382	11.141	0.196772	0.192831	11.0575	10.9094	11.3246	11.2722	10.2545	10.2974	9.96643	10.4345
Smad2	9.66181e-06	8.48625e-05	1.7934	0.842697	12.0239	12.8666	0.097376	0.0761299	12.7877	12.9326	12.931	12.815	11.8861	12.0465	12.1156	12.0472
SirT6	0.0245035	0.0552443	1.76021	0.815748	11.5798	12.3956	0.452801	0.306377	12.4548	11.954	12.6574	12.5162	11.7472	11.6733	10.9277	11.9711
PTEN	0.000119347	0.000643438	1.75656	0.812755	13.8023	14.6151	0.0779164	0.167443	14.5857	14.4049	14.6627	14.807	13.697	13.8186	13.8088	13.8849
PKM1/2	0.0020368	0.00631407	1.74934	0.806807	13.2309	14.0377	0.219329	0.22046	13.8546	14.3572	13.9476	13.9915	12.9296	13.3912	13.396	13.2068
JARID1C	0.000361741	0.0014868	1.73832	0.797691	13.3323	14.13	0.0774422	0.207419	14.0938	14.0183	14.4323	13.9755	13.2437	13.3193	13.4322	13.3339
MEK6	0.00159395	0.00521072	1.62367	0.699255	9.72529	10.4245	0.186148	0.176926	10.332	10.6899	10.3341	10.3423	9.48827	9.77522	9.9367	9.70098
p-AMPKa1(S485)	9.19692e-05	0.000530427	1.6104	0.687417	12.5686	13.256	0.0863784	0.121588	13.1936	13.1404	13.42	13.2701	12.5719	12.4644	12.5623	12.6757
MEK1	0.00176914	0.00562495	1.60421	0.681864	14.5422	15.2241	0.206277	0.15094	15.1443	15.4502	15.1427	15.1591	14.3193	14.4547	14.8025	14.5924
ILK1	0.000229858	0.0011401	1.57077	0.651474	12.0371	12.6886	0.153949	0.0634033	12.6554	12.6234	12.7683	12.7074	11.9155	12.0307	11.9462	12.2562
p-PTEN(S380)	2.61035e-05	0.000190402	1.56175	0.643162	12.4886	13.1318	0.065722	0.0906305	13.0126	13.2316	13.1535	13.1293	12.4474	12.4212	12.5633	12.5225
Bax	0.000301576	0.00133555	1.52443	0.608271	13.1199	13.7281	0.0929232	0.134294	13.6801	13.5612	13.8556	13.8157	13.183	13.0621	13.2135	13.0208
p-PDK1(S241)	0.000681402	0.00248511	1.51347	0.597862	11.2917	11.8896	0.131592	0.132318	11.7684	12.0706	11.9002	11.8191	11.1071	11.3525	11.2965	11.4107
p-AuroraA(T288)/B(T232)/C(T198)	0.0380804	0.0800334	1.50838	0.593001	10.715	11.308	0.434827	0.106672	11.2971	11.1927	11.451	11.2912	10.9376	10.0709	11.0093	10.8423
GLS1	0.00714489	0.0199094	1.49754	0.582592	13.8266	14.4092	0.254281	0.142583	14.3273	14.3304	14.6221	14.3569	14.1927	13.6058	13.7717	13.7362
HDAC4	0.0102467	0.0267492	1.48087	0.566444	11.9899	12.5563	0.246603	0.183318	12.526	12.3102	12.7179	12.6712	12.1248	11.8963	11.6911	12.2472
p-Beta-Catenin(S33/37/T41)	0.0839379	0.161369	1.44205	0.528125	8.66449	9.19262	0.479716	0.174223	9.38212	9.19628	8.96098	9.2311	8.89012	7.96006	9.02351	8.7843
Ret	0.0128007	0.0320665	1.42191	0.507834	12.2596	12.7674	0.229106	0.177883	12.6893	12.6498	13.0324	12.6982	12.5427	11.9869	12.2161	12.2926
Chk1	0.00290249	0.00856926	1.41136	0.497089	13.8794	14.3765	0.170718	0.114791	14.3033	14.3192	14.5475	14.3361	13.6938	14.0124	13.7755	14.036
p-p27/KIP1(T198)	0.000280279	0.0012638	1.401	0.486456	12.1098	12.5962	0.0730829	0.106147	12.575	12.4805	12.5919	12.7375	12.1722	12.0503	12.0428	12.1738
p-Bad(S155)	0.0106188	0.027149	1.37947	0.464118	12.064	12.5281	0.238058	0.0880862	12.4982	12.4815	12.6594	12.4735	12.2335	11.7165	12.2014	12.1048
KLF4	0.0265165	0.0587151	1.35951	0.443088	11.2899	11.733	0.298796	0.0511411	11.6922	11.6935	11.7468	11.7996	11.2377	11.7212	11.1607	11.0401
DNA-PKcs	0.00119172	0.00422211	1.35743	0.440878	11.5997	12.0406	0.148418	0.0373093	11.995	12.0517	12.0841	12.0317	11.5085	11.8114	11.593	11.4861
mTOR	0.00187293	0.00587956	1.34875	0.431624	12.2762	12.7078	0.145325	0.0751955	12.6757	12.6346	12.8106	12.7102	12.3428	12.0893	12.2447	12.4278
IDH1	2.25351e-05	0.000169354	1.34762	0.430415	13.0528	13.4833	0.0143322	0.071618	13.4286	13.4148	13.5368	13.5529	13.0464	13.0381	13.0553	13.0716
PKM2	0.00253964	0.00768085	1.33456	0.416364	12.494	12.9104	0.150032	0.0749729	12.8765	12.8239	12.9927	12.9485	12.4042	12.4091	12.4453	12.7174
ATM	0.000500094	0.00200038	1.3308	0.412292	13.3882	13.8005	0.0738304	0.0964637	13.7175	13.719	13.9036	13.8619	13.3027	13.3889	13.3785	13.4828
Jak1	0.0206483	0.048358	1.32384	0.404727	12.3066	12.7113	0.240291	0.0983562	12.579	12.7051	12.8114	12.7496	12.2153	12.6475	12.2754	12.0882
Atg12	0.0416276	0.0860304	1.32224	0.402982	11.6602	12.0632	0.223753	0.217555	11.9308	11.8325	12.2962	12.1934	11.7295	11.6892	11.3468	11.8755
NF-kB p65	0.0436061	0.0886419	1.27577	0.35137	11.7816	12.133	0.259588	0.0931571	12.0427	12.2636	12.1162	12.1094	11.421	11.7999	12.0339	11.8716
Raptor	0.00141104	0.00479366	1.27061	0.345519	10.7953	11.1408	0.0954088	0.0790755	11.1163	11.0526	11.242	11.1524	10.7441	10.9094	10.6943	10.8334
p-TRAP220/MED1(T1457)	0.0925681	0.176591	0.797641	-0.326189	12.0095	11.6833	0.294516	0.140633	11.4795	11.8016	11.7173	11.735	12.382	11.8142	12.1049	11.737
LSD1	0.00806531	0.0222244	0.780176	-0.358128	14.1985	13.8404	0.1501	0.106543	13.7634	13.7534	13.982	13.8627	14.3506	14.1185	14.0293	14.2956
c-Src	0.0651749	0.128281	0.779775	-0.35887	12.2468	11.8879	0.271637	0.166443	11.83	12.1361	11.7957	11.7897	12.2291	12.2129	12.6031	11.9419
p-NF-kB p65 (Ser536)	0.00517692	0.0147672	0.770778	-0.375612	10.9056	10.53	0.109059	0.137262	10.6567	10.3779	10.4505	10.635	10.8143	10.9119	10.8393	11.057
Atg7	0.0204783	0.048358	0.753346	-0.408616	11.3277	10.9191	0.255533	0.0559728	10.8628	10.995	10.8976	10.9208	11.1146	11.6904	11.3149	11.1908
p-4E-BP1(T37/T46)	0.0120535	0.0305029	0.745419	-0.423876	13.8762	13.4523	0.208869	0.115586	13.3902	13.4104	13.6249	13.3838	13.7545	13.9728	13.6581	14.1195
p-c-Myc(T58)	0.00130987	0.00457532	0.741507	-0.431468	13.6591	13.2276	0.092998	0.120897	13.1838	13.0782	13.3023	13.3461	13.7274	13.5286	13.6562	13.7241
Brg1	0.0978781	0.185296	0.73931	-0.435748	10.5858	10.15	0.27885	0.346729	10.0377	9.8457	10.6487	10.0679	10.7459	10.7345	10.1688	10.6939
G9a/EHMT2	3.35768e-05	0.000237916	0.724134	-0.465671	9.37883	8.91316	0.0801032	0.027455	8.90266	8.88574	8.95057	8.91366	9.44044	9.36121	9.27264	9.44102
SMARCC1/BAF55	0.00901919	0.0243126	0.718763	-0.476413	15.3152	14.8388	0.0987308	0.230839	14.7036	14.7276	15.1844	14.7397	15.4525	15.2208	15.2768	15.3109
p-Src(Y527)	0.000539566	0.002124	0.717484	-0.478981	10.3216	9.84258	0.130744	0.0582385	9.79098	9.80529	9.91997	9.8541	10.3073	10.2631	10.2079	10.508
Atg3	0.0206119	0.048358	0.709758	-0.4946	12.5723	12.0777	0.257148	0.185642	12.009	11.8735	12.3136	12.1146	12.5229	12.7148	12.2331	12.8183
BRCA2	0.000270196	0.0012638	0.668217	-0.581611	12.8848	12.3032	0.0868445	0.126037	12.3099	12.202	12.4787	12.2221	12.9681	12.9512	12.8157	12.8042
LDHA	0.00174258	0.00561245	0.66253	-0.593941	13.1901	12.5961	0.161161	0.152656	12.5261	12.4589	12.8109	12.5887	13.1949	13.2061	12.9829	13.3764
AuroraA/AIK	0.00140056	0.00479366	0.65996	-0.599549	11.6318	11.0323	0.19572	0.0882952	11.0197	10.9298	11.145	11.0346	11.7629	11.3666	11.603	11.7948
ALDH2	0.00150303	0.0050372	0.658052	-0.603727	10.2351	9.63133	0.19514	0.0998493	9.54405	9.61588	9.77428	9.59109	10.3528	9.97	10.4069	10.2106
Cyclin C	8.79206e-06	8.07567e-05	0.64525	-0.63207	11.2351	10.603	0.0285121	0.0866535	10.5325	10.5665	10.729	10.584	11.2384	11.273	11.2228	11.2061
FoxK2	0.0320055	0.0684256	0.634522	-0.656258	11.221	10.5647	0.471637	0.0222666	10.538	10.5603	10.5688	10.5919	10.9204	11.922	10.9691	11.0725
PDK1	3.5689e-05	0.000245858	0.619365	-0.691139	15.1492	14.4581	0.117657	0.0478571	14.3945	14.5098	14.4577	14.4704	15.2805	15.0439	15.2165	15.0561
STAT2	4.4316e-05	0.00028922	0.618821	-0.692406	15.1854	14.493	0.12102	0.0530674	14.4457	14.4627	14.5656	14.4978	15.1184	15.1679	15.0942	15.361
Bad	0.000583337	0.00222566	0.597492	-0.743009	10.876	10.133	0.173576	0.143595	10.1009	10.0085	10.3399	10.0827	11.0887	10.9308	10.686	10.7985
PI3Kp110a	0.000365705	0.0014868	0.580031	-0.785798	9.85367	9.06787	0.183541	0.118627	8.9757	9.0171	9.24164	9.03705	9.73833	10.0281	9.65741	9.99087
p-ULK1(S757)	6.27357e-06	6.22338e-05	0.574833	-0.798786	11.9744	11.1756	0.0759497	0.0779343	11.0753	11.1989	11.2624	11.1658	11.9445	12.0578	11.8843	12.011
Integrina4	0.00159683	0.00521072	0.570339	-0.810109	13.4626	12.6525	0.240956	0.174716	12.7349	12.3938	12.7746	12.7068	13.7633	13.2024	13.3552	13.5297
c-Myc	0.00583655	0.0164485	0.562638	-0.829722	13.8973	13.0676	0.3495	0.189008	12.9265	13.3034	13.1369	12.9036	13.9765	13.4884	14.3255	13.7989
Annexin1	0.000164331	0.000849043	0.494094	-1.01714	12.6391	11.6219	0.159089	0.185938	11.6905	11.3572	11.7895	11.6506	12.7312	12.6091	12.4283	12.7878
PHF2	8.71228e-05	0.00051444	0.483081	-1.04966	14.5906	13.5409	0.212818	0.0747814	13.4706	13.6389	13.5575	13.4966	14.8788	14.4261	14.6238	14.4336
p-PDGFRb(Y751)	0.0802222	0.156654	0.481284	-1.05504	7.56304	6.508	0.938532	0.355772	6.13706	6.48847	6.99091	6.41555	7.11644	8.92272	6.80861	7.40438
DNMT3B	0.0354913	0.0752293	0.473908	-1.07732	10.0448	8.96748	0.770114	0.207148	8.78912	9.22628	9.04282	8.81171	9.63195	11.139	10.0037	9.40461
PCAF	6.57705e-05	0.000397831	0.460483	-1.11878	9.43021	8.31142	0.200311	0.110578	8.32618	8.15603	8.41659	8.3469	9.71194	9.38139	9.23794	9.38956
p-SAPK/JNK(T183/Y185)	4.87885e-05	0.00030933	0.454945	-1.13624	14.609	13.4728	0.112215	0.189836	13.3598	13.3676	13.4081	13.7558	14.4474	14.704	14.6281	14.6566
c-Fos	6.60884e-08	5.57182e-06	0.431084	-1.21396	13.5936	12.3796	0.0742547	0.0192437	12.4033	12.3828	12.3567	12.3758	13.6631	13.6405	13.4984	13.5725
p-Rb(S780)	4.71362e-06	5.08251e-05	0.429449	-1.21944	14.031	12.8116	0.145691	0.0617173	12.7205	12.8484	12.8512	12.8262	13.9861	14.0278	13.8812	14.229
RRM2	1.00012e-06	1.50027e-05	0.425105	-1.23411	12.927	11.6929	0.104034	0.0658421	11.6491	11.6464	11.7873	11.689	12.8726	12.962	12.8183	13.0553
Ki67	1.30841e-07	6.48971e-06	0.37703	-1.40725	15.4167	14.0094	0.0846938	0.0526191	13.9798	14.0484	14.0589	13.9506	15.5434	15.3821	15.3727	15.3685
DEPTOR/DEPDC6	4.18253e-05	0.000280342	0.367611	-1.44375	13.3864	11.9427	0.23649	0.135923	11.9159	11.7691	12.0902	11.9955	13.4101	13.4762	13.0534	13.6061
Stat5a	1.73359e-07	6.60683e-06	0.270686	-1.88531	11.9403	10.055	0.121566	0.0695196	10.0005	10.157	10.0302	10.0323	11.7792	12.0744	11.958	11.9496
p-c-Fos(S32)	1.62646e-06	2.12296e-05	0.26707	-1.90471	13.4135	11.5088	0.185458	0.090358	11.5575	11.4487	11.6105	11.4185	13.3904	13.5287	13.1612	13.5738
RB1	3.4676e-07	6.95622e-06	0.263324	-1.92509	12.8189	10.8938	0.142854	0.0735168	10.8239	10.9234	10.9835	10.8446	12.64	12.875	12.7843	12.9766
p-Rb(S807/811)	7.72602e-08	5.57182e-06	0.253144	-1.98197	12.7822	10.8002	0.110564	0.0655946	10.7087	10.8625	10.8254	10.8043	12.6377	12.786	12.7984	12.9068
p-c-Jun(S63)	0.00059423	0.00223286	0.235775	-2.08452	11.4121	9.32758	0.374192	0.512036	9.42818	9.90124	8.65877	9.32213	11.2346	11.6079	11.8213	10.9846
c-Jun	1.86483e-07	6.60683e-06	0.231216	-2.11268	13.0337	10.9211	0.135962	0.0821708	10.9655	10.9319	10.9846	10.8022	13.1969	12.8732	13.0715	12.9934
Cox-2_M_V	0.000250132	0.00121633	0.217028	-2.20404	14.1968	11.9927	0.485246	0.302784	11.8578	11.7949	12.444	11.8741	14.7263	13.5574	14.3266	14.1767
p-Stat1(Y701)	6.91202e-06	6.593e-05	0.179275	-2.47975	10.8278	8.34806	0.0748853	0.335201	8.04547	8.76866	8.46462	8.11349	10.7383	10.901	10.7952	10.8767
cleaved Caspase-7	1.02841e-06	1.50027e-05	0.156623	-2.67463	12.5339	9.85929	0.1802	0.198495	9.70205	10.0788	9.68091	9.97545	12.419	12.664	12.7096	12.3431
Stat1	4.37646e-06	4.93346e-05	0.139693	-2.83967	15.1967	12.3571	0.294649	0.213424	12.3118	12.0907	12.5997	12.4261	15.134	15.3288	14.8181	15.5061
PDGFRb	3.09158e-07	6.95622e-06	0.116992	-3.09552	10.9568	7.8613	0.13779	0.212666	7.85015	8.16248	7.67897	7.7536	11.0492	11.0295	10.9958	10.7528
p-p53(S15)	2.565e-07	6.95622e-06	0.115377	-3.11558	12.1049	8.98928	0.204788	0.13839	8.89752	9.1784	8.87529	9.00591	11.8432	12.2391	12.0437	12.2934
p53	9.92344e-06	8.48625e-05	0.0888344	-3.49274	12.484	8.99131	0.269901	0.438202	8.86281	9.5407	8.49006	9.07168	12.1907	12.6381	12.7763	12.3311
Axl	3.64641e-07	6.95622e-06	0.0233824	-5.41843	12.5645	7.14607	0.121316	0.439611	7.21285	7.14289	7.64966	6.57889	12.6953	12.4201	12.5161	12.6266
FGFR1	2.65524e-07	6.95622e-06	0.00273538	-8.51404	8.51404	0	0.679368	0	0	0	0	0	8.792	7.53033	8.65406	9.07978
