# Supplementary material for: SOD1 is a synthetic-lethal target in PPM1D-mutant leukemia cells
Source: eLife. 2024 Jun 18;12:RP91611. doi: 10.7554/eLife.91611 (PMC11186636; doi:10.7554/eLife.91611)
Supplement: Figure 4—source data 3. [file elife-91611-fig4-data3.xlsx]

## Sheet: Sheet1
GeneSet	-log10(pValue) PPM1D.SOD1KO_over_WT.SOD1KO_10h_log2fold_change.DOWN_genes	-log10(pValue) PPM1D.SOD1KO_over_PPM1D.EV_10h_log2fold_change.ALL_genes	-log10(pValue) PPM1D.SOD1KO_over_PPM1D.EV_10h_log2fold_change.DOWN_genes	-log10(pValue) PPM1D.EV_over_WT.EV_10h_log2fold_change.UP_genes	-log10(pValue) WT.SOD1KO_over_WT.EV_10h_log2fold_change.ALL_genes	-log10(pValue) PPM1D.SOD1KO_over_WT.SOD1KO_10h_log2fold_change.UP_genes	-log10(pValue) WT.SOD1KO_over_WT.EV_10h_log2fold_change.DOWN_genes	-log10(pValue) PPM1D.SOD1KO_over_PPM1D.EV_10h_log2fold_change.UP_genes	-log10(pValue) PPM1D.SOD1KO_over_WT.SOD1KO_6h_log2fold_change.ALL_genes	-log10(pValue) PPM1D.EV_over_WT.EV_10h_log2fold_change.DOWN_genes	-log10(pValue) PPM1D.EV_over_WT.EV_10h_log2fold_change.ALL_genes	-log10(pValue) PPM1D.SOD1KO_over_PPM1D.EV_6h_log2fold_change.UP_genes	-log10(pValue) PPM1D.EV_over_WT.EV_6h_log2fold_change.DOWN_genes	-log10(pValue) PPM1D.EV_over_WT.EV_6h_log2fold_change.ALL_genes	-log10(pValue) PPM1D.SOD1KO_over_WT.SOD1KO_10h_log2fold_change.ALL_genes	-log10(pValue) PPM1D.SOD1KO_over_WT.SOD1KO_6h_log2fold_change.DOWN_genes	-log10(pValue) PPM1D.EV_over_WT.EV_6h_log2fold_change.UP_genes	-log10(pValue) PPM1D.SOD1KO_over_WT.SOD1KO_6h_log2fold_change.UP_genes	-log10(pValue) WT.SOD1KO_over_WT.EV_10h_log2fold_change.UP_genes	Overlapping genes PPM1D.SOD1KO_over_WT.SOD1KO_10h_log2fold_change.DOWN_genes	Overlapping genes PPM1D.SOD1KO_over_PPM1D.EV_6h_log2fold_change.DOWN_genes	Overlapping genes PPM1D.SOD1KO_over_PPM1D.EV_10h_log2fold_change.ALL_genes	Overlapping genes WT.SOD1KO_over_WT.EV_6h_log2fold_change.ALL_genes	Overlapping genes PPM1D.SOD1KO_over_PPM1D.EV_10h_log2fold_change.DOWN_genes	Overlapping genes PPM1D.EV_over_WT.EV_10h_log2fold_change.UP_genes	Overlapping genes WT.SOD1KO_over_WT.EV_10h_log2fold_change.ALL_genes	Overlapping genes WT.SOD1KO_over_WT.EV_6h_log2fold_change.DOWN_genes	Overlapping genes PPM1D.SOD1KO_over_WT.SOD1KO_10h_log2fold_change.UP_genes	Overlapping genes PPM1D.SOD1KO_over_PPM1D.EV_6h_log2fold_change.ALL_genes	Overlapping genes WT.SOD1KO_over_WT.EV_10h_log2fold_change.DOWN_genes	Overlapping genes PPM1D.SOD1KO_over_PPM1D.EV_10h_log2fold_change.UP_genes	Overlapping genes PPM1D.SOD1KO_over_WT.SOD1KO_6h_log2fold_change.ALL_genes	Overlapping genes WT.SOD1KO_over_WT.EV_6h_log2fold_change.UP_genes	Overlapping genes PPM1D.EV_over_WT.EV_10h_log2fold_change.DOWN_genes	Overlapping genes PPM1D.EV_over_WT.EV_10h_log2fold_change.ALL_genes	Overlapping genes PPM1D.SOD1KO_over_PPM1D.EV_6h_log2fold_change.UP_genes	Overlapping genes PPM1D.EV_over_WT.EV_6h_log2fold_change.DOWN_genes	Overlapping genes PPM1D.EV_over_WT.EV_6h_log2fold_change.ALL_genes	Overlapping genes PPM1D.SOD1KO_over_WT.SOD1KO_10h_log2fold_change.ALL_genes	Overlapping genes PPM1D.SOD1KO_over_WT.SOD1KO_6h_log2fold_change.DOWN_genes	Overlapping genes PPM1D.EV_over_WT.EV_6h_log2fold_change.UP_genes	Overlapping genes PPM1D.SOD1KO_over_WT.SOD1KO_6h_log2fold_change.UP_genes	Overlapping genes WT.SOD1KO_over_WT.EV_10h_log2fold_change.UP_genes	Overlapping gene count PPM1D.SOD1KO_over_WT.SOD1KO_10h_log2fold_change.DOWN_genes	Overlapping gene count PPM1D.SOD1KO_over_PPM1D.EV_6h_log2fold_change.DOWN_genes	Overlapping gene count PPM1D.SOD1KO_over_PPM1D.EV_10h_log2fold_change.ALL_genes	Overlapping gene count WT.SOD1KO_over_WT.EV_6h_log2fold_change.ALL_genes	Overlapping gene count PPM1D.SOD1KO_over_PPM1D.EV_10h_log2fold_change.DOWN_genes	Overlapping gene count PPM1D.EV_over_WT.EV_10h_log2fold_change.UP_genes
GO_RESPONSE_TO_ENDOGENOUS_STIMULUS	19.237	26.158	10.639	20.374	23.538	22.433	19.966	16.088	41.571	23.591	44.73		19.19	45.067	41.683	21.739	26.746	20.225	5.389	CASP7;STAT2;SMARCC1;FGFR1;SRC;KAT2B;TP53;ATG7;STAT1;STAT5A;EIF4EBP1;RELA;ITGA4;SMARCA4;ANXA1;FOS;BAD;LDHA;PIK3CA;JUN;KDM1A;PDGFRB;MED1;DNMT3B;PTGS2		BAD;RPS6KB1;ERBB2;KIT;FOS;DNMT1;MTOR;ANXA1;TP53;ITGB1;STAT6;IGF1R;PDGFRA;CAV1;NCOA1;SOCS1;PRKAA1;GATA3;SMAD2;CDKN1A;RPTOR;DNMT3B;STAT3;JUN;BCL2L1;EGFR;VIM;STAT4;STAT5A;RELA	RELA;CAV1;FOS;BAD;ERBB2;RPTOR;CHUK;TP53	EGFR;PDGFRA;GATA3;SMAD2;BAD;RPS6KB1;NCOA1;RPTOR;STAT3;ERBB2;BCL2L1;DNMT1;KIT;CAV1	IDH1;TSC2;ERBB2;PRKDC;ASH2L;ITGB1;NCOA1;CLDN1;PDGFRA;SMAD2;PRKAA1;PTEN;MTOR;CDKN1B;LRP6;ESR1;CREBBP;VIM;FOXO1;HDAC4;NOTCH1;STAT6;SHC1;RPS6KB1;CTNNB1;CDKN1A;KLF4	TSC2;SMAD2;EIF4EBP1;DNMT3B;NCOA1;VIM;EGFR;DNMT1;HDAC4;FOXO1;MED1;PIK3CA;LRP6;CREBBP;ITGB1;RELA;RPS6KB1;KIT;ERBB2;STAT6;ILK;EZH2;KLF4;STAT3;NCOA3;CDKN1B;MTOR;CASP3;RPTOR;CAV1;BAD		STAT6;CDKN1B;EGFR;CREBBP;TSC2;PGR;NCOA1;ITGB1;CAV1;PRKAA1;RELA;MTOR;PTEN;NOTCH1;ILK;FOXO1;BAD;PRKDC;ERBB2;RPTOR;KLF4;LRP6;SMAD2;HDAC4;VIM;RPS6KB1;CDKN1A;IDH1;CTNNB1		CDKN1B;STAT3;RELA;KIT;BAD;MED1;CREBBP;LRP6;RPS6KB1;CASP3;TSC2;ERBB2;STAT6;CAV1;DNMT1;NCOA3;ILK;FOXO1;RPTOR;EGFR;MTOR;PIK3CA;EIF4EBP1;HDAC4;NCOA1;SMAD2	JUN;SOCS1;VIM;STAT5A;ANXA1;MTOR;STAT4;CDKN1A;RELA;PRKAA1;TP53;DNMT3B;STAT6;FOS;EGFR;IGF1R;ITGB1	HDAC4;VIM;SMARCC1;RELA;PDGFRB;KAT2B;STAT5A;LRP6;TP53;ATG7;PRKDC;FOXO1;CHUK;KDM1A;YAP1;CREBBP;STAT1;EGFR;NOTCH1;SMARCA4;STAT6;ITGA4;ZEB1;LDHA;KLF4;CASP7;JUN;KIT;STAT3;CASP3;RPTOR;PIK3CA;ESR1;DNMT1;ITGB1;RPS6KB1;DNMT3B;NCOA3;CTNNB1;PDGFRA;FGFR1;NCOA1;BAD;CBX3;TSC2;STAT2;MTOR;FOS;CDKN1B;ASH2L;CDKN1A;ANXA1;PTGS2	FOS;ERBB2;RPTOR;TP53;CAV1;CHUK;RELA	STAT5A;KDM1A;TP53;CASP3;CASP7;STAT3;SRC;KIT;NCOA3;FGFR1;STAT1;DNMT3B;STAT4;RPS6KB1;STAT2;LDHA;ITGA4;RELA;BAD;ATG7;EIF4EBP1;JUN;ALK;SMARCC1;PDGFRB;FOS;ANXA1;KAT2B;PTGS2;CHUK;PIK3CA	CLDN1;PDGFRB;NCOA3;HDAC4;STAT5A;ITGB1;KDM1A;TP53;CDKN1B;STAT1;CHUK;PRKAA1;LDHA;PDGFRA;PTEN;CTNNB1;CASP3;VIM;NCOA1;MTOR;STAT2;PRKDC;ERBB2;CREBBP;FGFR1;ALK;CASP7;RPS6KB1;JUN;TSC2;EIF4EBP1;STAT3;FOS;STAT4;LRP6;ASH2L;ATG7;STAT6;IDH1;KAT2B;PTGS2;SHC1;NOTCH1;PIK3CA;SMAD2;ESR1;BAD;DNMT3B;KLF4;ITGA4;FOXO1;CDKN1A;ANXA1;RELA;SMARCC1;KIT;SRC		STAT1;CASP7;KAT2B;PTGS2;CASP3;STAT5A;LDHA;STAT2;STAT6;KIT;RPS6KB1;FOS;FGFR1;PDGFRB;JUN;ANXA1;EIF4EBP1;STAT4;DNMT1;ATG7;PIK3CA;BAD;SMARCC1;TP53;SRC;DNMT3B	RPS6KB1;FGFR1;EP300;LRP6;HDAC4;STAT6;PDGFRB;TP53;ZEB1;PRKAA1;DNMT1;ESR1;CDKN1B;CREBBP;KAT2B;AR;SRC;TSC2;PIK3CA;ASH2L;CAV1;HDAC1;FOXO1;CLDN1;LDHA;STAT2;MED1;GATA3;RPTOR;STAT4;DNMT3B;PTGS2;KIT;CASP3;PRKDC;STAT5A;EIF4EBP1;MTOR;BAD;ATG7;SMARCC1;JUN;VIM;CDKN1A;NCOA1;ANXA1;FOS;CTNNB1;SMAD2;IDH1;ITGB1;STAT1;KLF4;PDGFRA;ERBB2;CASP7;NOTCH1	ERBB2;DNMT3B;CTNNB1;ILK;FOXO1;NCOA1;SMARCA4;PDGFRB;PRKAA1;HDAC4;ITGA4;EIF4EBP1;TSC2;ITGB1;ATG7;FGFR1;PRKDC;CDKN1A;ANXA1;KDM1A;MTOR;CAV1;FOS;MED1;KAT2B;CREBBP;STAT2;SMARCC1;RPTOR;PIK3CA;PGR;NOTCH1;LRP6;IDH1;STAT6;RELA;SRC;KLF4;CASP7;VIM;CDKN1B;PTGS2;EGFR;LDHA;SMAD2;STAT1;JUN;BAD;STAT5A;RPS6KB1;PTEN;TP53	ATG7;PIK3CA;DNMT3B;BAD;PTGS2;RELA;DNMT1;ANXA1;ITGA4;CASP7;KIT;LDHA;STAT1;STAT3;JUN;STAT6;NCOA3;FOS;PDGFRB;KDM1A;SMARCC1;CHUK;STAT5A;CBX3;RPTOR;FGFR1;KAT2B;TP53;RPS6KB1;CASP3;STAT2	ESR1;SMAD2;NCOA1;CTNNB1;TSC2;CDKN1A;NOTCH1;GATA3;HDAC4;MED1;ASH2L;EP300;PDGFRA;PRKDC;RPTOR;LRP6;ITGB1;FOXO1;PRKAA1;CLDN1;BAD;IDH1;VIM;KLF4;ZEB1;HDAC1;AR;RPS6KB1;CAV1;CREBBP;ERBB2;STAT6;CDKN1B;MTOR	MTOR;NOTCH1;ESR1;PDGFRA;HDAC4;CREBBP;CTNNB1;EGFR;CDKN1A;ASH2L;VIM;RPS6KB1;TSC2;KLF4;ZEB1;NCOA1;FOXO1;STAT6;SMARCA4;ITGB1;PRKDC;CDKN1B;LRP6;YAP1	ITGB1;SMAD2;MED1;EZH2;TSC2;DNMT3B;KLF4;VIM	25		30	8	14	27
GO_RESPONSE_TO_OXYGEN_CONTAINING_COMPOUND	17.89	26.008	11.57	20.927	24.337	22.129	20.932	14.192	41.004	22.193	42.941		18.983	40.595	39.768	21.365	25.455	22.611	5.389	STAT2;SMARCC1;SRC;KAT2B;TP53;ATG7;STAT1;STAT5A;EIF4EBP1;RELA;ITGA4;SMARCA4;ANXA1;FOS;BAD;LDHA;PIK3CA;JUN;KDM1A;PDGFRB;MAPK8;MED1;DNMT3B;PTGS2		BAD;RPS6KB1;FOS;DNMT1;MTOR;ANXA1;TP53;STAT6;IGF1R;PDGFRA;CAV1;NCOA1;MET;SOCS1;PRKAA1;GATA3;SMAD2;CDKN1A;RPTOR;DNMT3B;STAT3;JUN;BCL2L1;EGFR;VIM;ATM;GLDC;STAT4;STAT5A;RELA	RELA;CAV1;FOS;BAD;RPTOR;CHUK;TP53	EGFR;PDGFRA;GATA3;SMAD2;ATM;MET;BAD;RPS6KB1;NCOA1;RPTOR;GLDC;STAT3;BCL2L1;DNMT1;CAV1	MET;TSC2;MAP1LC3A;PRKDC;CHEK2;BAK1;NCOA1;CLDN1;PDGFRA;SMAD2;PRKAA1;PTEN;MTOR;MAP2K6;CDKN1B;LRP6;ESR1;VIM;RET;FOXO1;NOTCH1;STAT6;SHC1;RPS6KB1;CTNNB1;CDKN1A;KLF4;NFKBIA	TSC2;SMAD2;EIF4EBP1;DNMT3B;NCOA1;VIM;MAPK8;NFKBIA;EGFR;DNMT1;MET;FOXO1;MED1;PIK3CA;LRP6;RELA;CHEK2;RPS6KB1;BAK1;STAT6;EZH2;KLF4;STAT3;NCOA3;ATM;CDKN1B;MTOR;CASP3;RPTOR;CAV1;MAP2K6;BAD		MAP1LC3A;STAT6;CDKN1B;EGFR;TSC2;NCOA1;CAV1;PRKAA1;NFKBIA;CHEK2;MAP2K6;RELA;MTOR;RET;PTEN;NOTCH1;FOXO1;BAD;PRKDC;RPTOR;KLF4;MET;LRP6;SMAD2;VIM;ATM;RPS6KB1;CDKN1A;CTNNB1		CDKN1B;STAT3;RELA;BAD;MED1;LRP6;RPS6KB1;CASP3;CHEK2;TSC2;STAT6;CAV1;MET;MAPK8;DNMT1;NCOA3;ATM;FOXO1;MAP2K6;RPTOR;EGFR;MTOR;PIK3CA;EIF4EBP1;NCOA1;NFKBIA;SMAD2	JUN;SOCS1;VIM;STAT5A;ANXA1;MTOR;STAT4;CDKN1A;RELA;PRKAA1;TP53;DNMT3B;STAT6;FOS;EGFR;IGF1R	VIM;SMARCC1;RELA;MAP1LC3A;PDGFRB;KAT2B;STAT5A;LRP6;TP53;ATG7;PRKDC;FOXO1;CHUK;NFKBIA;KDM1A;CHEK2;YAP1;STAT1;EGFR;NOTCH1;SMARCA4;STAT6;ZEB1;ITGA4;LDHA;KLF4;JUN;STAT3;CASP3;RPTOR;PIK3CA;RET;ESR1;MAPK8;DNMT1;RPS6KB1;DNMT3B;NCOA3;CTNNB1;PDGFRA;NCOA1;MAP2K6;BAD;CBX3;MET;STAT2;TSC2;MTOR;FOS;CDKN1B;CDKN1A;ANXA1;PTGS2	FOS;RPTOR;TP53;CAV1;CHUK;RELA	STAT5A;KDM1A;TP53;CASP3;STAT3;SRC;CHEK2;NCOA3;STAT1;DNMT3B;STAT4;RPS6KB1;STAT2;LDHA;ITGA4;RELA;MAPK8;BAD;ATG7;EIF4EBP1;JUN;ALK;SMARCC1;PDGFRB;FOS;ANXA1;KAT2B;PTGS2;CHUK;PIK3CA	CHEK2;CLDN1;PDGFRB;NCOA3;NFKBIA;STAT5A;RET;KDM1A;TP53;CDKN1B;STAT1;CHUK;PRKAA1;LDHA;PDGFRA;PTEN;CTNNB1;CASP3;VIM;NCOA1;MTOR;STAT2;PRKDC;MAP1LC3A;MAP2K6;ALK;TSC2;EIF4EBP1;RPS6KB1;JUN;STAT3;FOS;STAT4;LRP6;ATG7;STAT6;KAT2B;NOTCH1;PTGS2;SHC1;BAK1;PIK3CA;SMAD2;MAPK8;ESR1;BAD;DNMT3B;KLF4;MET;ITGA4;FOXO1;CDKN1A;ANXA1;RELA;SMARCC1;SRC		STAT1;KAT2B;CHEK2;PTGS2;CASP3;STAT5A;LDHA;STAT2;STAT6;RPS6KB1;FOS;MAPK8;PDGFRB;JUN;ANXA1;EIF4EBP1;STAT4;DNMT1;RET;ATG7;PIK3CA;BAD;SMARCC1;TP53;SRC;DNMT3B	MAP1LC3A;RPS6KB1;LRP6;STAT6;PDGFRB;TP53;CHEK2;ZEB1;PRKAA1;GLDC;DNMT1;ESR1;CDKN1B;KAT2B;AR;SRC;TSC2;PIK3CA;FOXO1;CAV1;CLDN1;STAT2;MED1;GATA3;MET;RPTOR;STAT4;DNMT3B;PTGS2;CASP3;PRKDC;STAT5A;EIF4EBP1;MTOR;BAD;ATG7;SMARCC1;JUN;MAP2K6;VIM;CDKN1A;NFKBIA;NCOA1;ANXA1;FOS;MAPK8;SMAD2;CTNNB1;STAT1;RET;KLF4;PDGFRA;LDHA;NOTCH1	DNMT3B;ATM;NCOA1;CTNNB1;FOXO1;SMARCA4;PDGFRB;PRKAA1;ITGA4;EIF4EBP1;MAP1LC3A;TSC2;ATG7;PRKDC;CDKN1A;ANXA1;MET;KDM1A;MTOR;CAV1;FOS;MED1;KAT2B;STAT2;SMARCC1;RPTOR;PIK3CA;NOTCH1;LRP6;STAT6;MAPK8;RELA;SRC;KLF4;MAP2K6;RET;VIM;CDKN1B;PTGS2;EGFR;LDHA;SMAD2;STAT1;JUN;NFKBIA;BAD;STAT5A;RPS6KB1;PTEN;TP53;CHEK2	ATG7;PIK3CA;DNMT3B;BAD;PTGS2;RELA;DNMT1;ANXA1;ITGA4;LDHA;STAT1;MAPK8;CHEK2;STAT3;JUN;STAT6;NCOA3;FOS;PDGFRB;KDM1A;SMARCC1;CHUK;STAT5A;CBX3;RPTOR;KAT2B;TP53;RPS6KB1;CASP3;RET;STAT2	ESR1;SMAD2;NCOA1;CTNNB1;MAP1LC3A;GLDC;TSC2;CDKN1A;NOTCH1;GATA3;MET;MED1;NFKBIA;PDGFRA;PRKDC;RPTOR;LRP6;RET;FOXO1;PRKAA1;CLDN1;BAD;CHEK2;VIM;KLF4;ZEB1;MAP2K6;AR;RPS6KB1;CAV1;STAT6;CDKN1B;MTOR	MTOR;NOTCH1;ESR1;PDGFRA;RET;CTNNB1;EGFR;CDKN1A;MAP2K6;NFKBIA;VIM;RPS6KB1;TSC2;MET;KLF4;ZEB1;CHEK2;NCOA1;FOXO1;STAT6;SMARCA4;PRKDC;CDKN1B;LRP6;MAP1LC3A;YAP1	SMAD2;MED1;EZH2;TSC2;DNMT3B;KLF4;BAK1;VIM	24		30	7	15	28
GO_RESPONSE_TO_NITROGEN_COMPOUND	16.316	22.911	7.631	14.996	17.261	18.532	13.068	16.556	34.102	21.569	36.745		17.703	33.097	33.864	18.65	17.271	16.337	4.437	CASP7;STAT2;SMARCC1;SRC;KAT2B;TP53;ATG7;STAT1;STAT5A;EIF4EBP1;RELA;ITGA4;ANXA1;FOS;BAD;LDHA;PIK3CA;KDM1A;DNMT3B;PTGS2		BAD;RPS6KB1;FOS;DNMT1;MTOR;ANXA1;TP53;ITGB1;STAT6;IGF1R;PDGFRA;CAV1;SOCS1;PRKAA1;CDKN1A;RPTOR;DNMT3B;STAT3;BCL2L1;EGFR;VIM;GLDC;STAT4;STAT5A;RELA	RELA;CAV1;FOS;BAD;RPTOR;CHUK;TP53	EGFR;PDGFRA;BAD;RPS6KB1;RPTOR;GLDC;STAT3;BCL2L1;DNMT1;CAV1	TSC2;MAP1LC3A;PRKDC;ITGB1;PDGFRA;PRKAA1;PTEN;MTOR;CDKN1B;LRP6;VIM;FOXO1;NOTCH1;STAT6;SHC1;RPS6KB1;CTNNB1;CDKN1A;KLF4;NFKBIA	TSC2;EIF4EBP1;DNMT3B;VIM;NFKBIA;EGFR;DNMT1;FOXO1;PIK3CA;LRP6;ITGB1;RELA;RPS6KB1;STAT6;EZH2;KLF4;STAT3;CDKN1B;MTOR;CASP3;RPTOR;CAV1;BAD		MAP1LC3A;STAT6;CDKN1B;EGFR;TSC2;ITGB1;CAV1;PRKAA1;NFKBIA;RELA;MTOR;PTEN;NOTCH1;FOXO1;BAD;PRKDC;RPTOR;KLF4;LRP6;VIM;RPS6KB1;CDKN1A;CTNNB1		RPS6KB1;CASP3;CDKN1B;FOXO1;RPTOR;STAT6;CAV1;TSC2;EGFR;DNMT1;MTOR;PIK3CA;EIF4EBP1;STAT3;RELA;BAD;NFKBIA;LRP6	SOCS1;ANXA1;STAT5A;VIM;MTOR;STAT4;CDKN1A;RELA;PRKAA1;TP53;DNMT3B;STAT6;FOS;EGFR;IGF1R;ITGB1	VIM;SMARCC1;RELA;MAP1LC3A;KAT2B;STAT5A;LRP6;TP53;ATG7;PRKDC;FOXO1;CHUK;NFKBIA;KDM1A;STAT1;EGFR;NOTCH1;STAT6;ZEB1;ITGA4;LDHA;KLF4;CASP7;STAT3;CASP3;RPTOR;PIK3CA;DNMT1;ITGB1;RPS6KB1;DNMT3B;CTNNB1;PDGFRA;BAD;TSC2;STAT2;MTOR;FOS;CDKN1B;CDKN1A;ANXA1;PTGS2	FOS;RPTOR;TP53;CAV1;CHUK;RELA	STAT5A;KDM1A;TP53;CASP3;CASP7;STAT3;SRC;STAT1;DNMT3B;STAT4;RPS6KB1;STAT2;LDHA;ITGA4;RELA;BAD;ATG7;EIF4EBP1;ALK;SMARCC1;FOS;ANXA1;KAT2B;PTGS2;CHUK;PIK3CA	NFKBIA;ITGB1;STAT5A;KDM1A;TP53;CDKN1B;STAT1;CHUK;PRKAA1;LDHA;PDGFRA;PTEN;CTNNB1;CASP3;VIM;MTOR;STAT2;PRKDC;MAP1LC3A;ALK;CASP7;TSC2;EIF4EBP1;RPS6KB1;STAT3;FOS;STAT4;LRP6;ATG7;STAT6;KAT2B;NOTCH1;PTGS2;SHC1;PIK3CA;BAD;DNMT3B;KLF4;ITGA4;FOXO1;CDKN1A;ANXA1;RELA;SMARCC1;SRC		STAT1;CASP7;KAT2B;PTGS2;CASP3;STAT5A;LDHA;STAT2;STAT6;RPS6KB1;FOS;ANXA1;EIF4EBP1;STAT4;DNMT1;ATG7;PIK3CA;BAD;SMARCC1;TP53;SRC;DNMT3B	MAP1LC3A;RPS6KB1;LRP6;STAT6;TP53;ZEB1;PRKAA1;GLDC;DNMT1;CDKN1B;KAT2B;SRC;TSC2;PIK3CA;FOXO1;CAV1;STAT2;RPTOR;STAT4;DNMT3B;PTGS2;CASP3;PRKDC;STAT5A;EIF4EBP1;MTOR;BAD;ATG7;SMARCC1;VIM;CDKN1A;NFKBIA;ANXA1;FOS;CTNNB1;ITGB1;STAT1;KLF4;PDGFRA;LDHA;CASP7;NOTCH1	DNMT3B;CTNNB1;FOXO1;PRKAA1;ITGA4;EIF4EBP1;MAP1LC3A;TSC2;ITGB1;ATG7;PRKDC;CDKN1A;ANXA1;KDM1A;RPS6KB1;MTOR;CAV1;FOS;KAT2B;STAT2;SMARCC1;RPTOR;PIK3CA;NOTCH1;LRP6;STAT6;RELA;SRC;CASP7;VIM;CDKN1B;PTGS2;EGFR;LDHA;STAT1;NFKBIA;BAD;STAT5A;KLF4;PTEN;TP53	ATG7;PIK3CA;DNMT3B;BAD;PTGS2;RELA;DNMT1;ANXA1;ITGA4;CASP7;LDHA;STAT1;STAT3;STAT6;FOS;KDM1A;SMARCC1;CHUK;STAT5A;RPTOR;KAT2B;TP53;RPS6KB1;CASP3;STAT2	CTNNB1;MAP1LC3A;GLDC;TSC2;CDKN1A;NOTCH1;NFKBIA;PDGFRA;PRKDC;RPTOR;LRP6;ITGB1;FOXO1;PRKAA1;BAD;VIM;KLF4;ZEB1;RPS6KB1;CAV1;STAT6;CDKN1B;MTOR	MTOR;NOTCH1;PDGFRA;CTNNB1;EGFR;CDKN1A;NFKBIA;VIM;RPS6KB1;TSC2;KLF4;ZEB1;FOXO1;STAT6;ITGB1;PRKDC;CDKN1B;LRP6;MAP1LC3A	ITGB1;EZH2;TSC2;KLF4;DNMT3B;VIM	20		25	7	10	20
GO_CELLULAR_RESPONSE_TO_ENDOGENOUS_STIMULUS	17.253	22.397	10.336	14.64	20.254	16.76	17.639	12.409	33.252	19.584	34.39		16.018	35.859	34.337	18.966	20.108	14.887	4.89	CASP7;SMARCC1;FGFR1;SRC;KAT2B;TP53;ATG7;STAT1;STAT5A;EIF4EBP1;RELA;ITGA4;SMARCA4;ANXA1;FOS;PIK3CA;JUN;KDM1A;PDGFRB;MED1;DNMT3B;PTGS2		RPS6KB1;ERBB2;KIT;FOS;DNMT1;MTOR;ANXA1;TP53;STAT6;IGF1R;PDGFRA;CAV1;NCOA1;SOCS1;PRKAA1;GATA3;SMAD2;RPTOR;DNMT3B;STAT3;JUN;BCL2L1;EGFR;VIM;STAT5A;RELA	RELA;CAV1;FOS;ERBB2;RPTOR;TP53	EGFR;PDGFRA;GATA3;SMAD2;NCOA1;RPS6KB1;RPTOR;STAT3;ERBB2;BCL2L1;DNMT1;KIT;CAV1	TSC2;ERBB2;PRKDC;NCOA1;CLDN1;PDGFRA;SMAD2;PRKAA1;PTEN;MTOR;ESR1;CREBBP;VIM;FOXO1;HDAC4;NOTCH1;STAT6;SHC1;RPS6KB1;CTNNB1;KLF4	TSC2;SMAD2;EIF4EBP1;DNMT3B;NCOA1;VIM;EGFR;DNMT1;HDAC4;FOXO1;MED1;PIK3CA;CREBBP;RELA;RPS6KB1;KIT;ERBB2;STAT6;ILK;EZH2;KLF4;STAT3;NCOA3;MTOR;CASP3;RPTOR;CAV1		STAT6;EGFR;CREBBP;TSC2;PGR;NCOA1;CAV1;PRKAA1;RELA;MTOR;PTEN;NOTCH1;ILK;FOXO1;PRKDC;ERBB2;RPTOR;KLF4;SMAD2;HDAC4;VIM;RPS6KB1;CTNNB1		STAT3;RELA;KIT;MED1;CREBBP;RPS6KB1;CASP3;TSC2;ERBB2;STAT6;CAV1;DNMT1;NCOA3;ILK;FOXO1;RPTOR;EGFR;MTOR;PIK3CA;EIF4EBP1;HDAC4;NCOA1;SMAD2	JUN;SOCS1;VIM;STAT5A;ANXA1;MTOR;RELA;PRKAA1;TP53;DNMT3B;STAT6;FOS;EGFR;IGF1R	HDAC4;VIM;SMARCC1;RELA;PDGFRB;KAT2B;STAT5A;TP53;ATG7;PRKDC;FOXO1;KDM1A;YAP1;CREBBP;STAT1;EGFR;SMARCA4;NOTCH1;STAT6;ITGA4;ZEB1;KLF4;CASP7;JUN;KIT;STAT3;CASP3;RPTOR;PIK3CA;ESR1;DNMT1;RPS6KB1;DNMT3B;NCOA3;CTNNB1;PDGFRA;FGFR1;NCOA1;CBX3;TSC2;MTOR;FOS;ANXA1;PTGS2	FOS;ERBB2;RPTOR;TP53;CAV1;RELA	STAT5A;KDM1A;TP53;CASP3;CASP7;STAT3;SRC;KIT;NCOA3;FGFR1;STAT1;DNMT3B;RPS6KB1;ITGA4;RELA;ATG7;EIF4EBP1;JUN;ALK;SMARCC1;PDGFRB;FOS;ANXA1;KAT2B;PTGS2;PIK3CA	CLDN1;PDGFRB;NCOA3;HDAC4;STAT5A;KDM1A;TP53;STAT1;PRKAA1;PDGFRA;PTEN;CTNNB1;CASP3;VIM;NCOA1;MTOR;PRKDC;ERBB2;CREBBP;FGFR1;ALK;CASP7;RPS6KB1;JUN;TSC2;EIF4EBP1;STAT3;FOS;ATG7;STAT6;KAT2B;NOTCH1;PTGS2;SHC1;PIK3CA;SMAD2;ESR1;DNMT3B;KLF4;ITGA4;FOXO1;ANXA1;RELA;SMARCC1;KIT;SRC		STAT1;CASP7;KAT2B;PTGS2;CASP3;STAT5A;STAT6;KIT;RPS6KB1;FOS;FGFR1;PDGFRB;JUN;ANXA1;EIF4EBP1;DNMT1;ATG7;PIK3CA;SMARCC1;TP53;SRC;DNMT3B	RPS6KB1;FGFR1;EP300;HDAC4;STAT6;PDGFRB;TP53;ZEB1;PRKAA1;DNMT1;ESR1;CREBBP;KAT2B;AR;SRC;TSC2;PIK3CA;FOXO1;CAV1;HDAC1;CLDN1;MED1;GATA3;RPTOR;DNMT3B;PTGS2;KIT;CASP3;PRKDC;STAT5A;EIF4EBP1;MTOR;ATG7;SMARCC1;JUN;VIM;NCOA1;ANXA1;FOS;CTNNB1;SMAD2;STAT1;KLF4;PDGFRA;ERBB2;CASP7;NOTCH1	ERBB2;DNMT3B;CTNNB1;ILK;FOXO1;NCOA1;SMARCA4;PDGFRB;PRKAA1;HDAC4;ITGA4;EIF4EBP1;TSC2;ATG7;FGFR1;PRKDC;ANXA1;KDM1A;MTOR;CAV1;FOS;MED1;KAT2B;CREBBP;SMARCC1;RPTOR;PIK3CA;PGR;NOTCH1;STAT6;RELA;SRC;KLF4;CASP7;VIM;PTGS2;EGFR;SMAD2;STAT1;JUN;STAT5A;RPS6KB1;PTEN;TP53	ATG7;PIK3CA;DNMT3B;PTGS2;RELA;DNMT1;ANXA1;ITGA4;CASP7;KIT;STAT1;STAT3;JUN;STAT6;NCOA3;FOS;PDGFRB;KDM1A;SMARCC1;STAT5A;CBX3;RPTOR;FGFR1;KAT2B;TP53;RPS6KB1;CASP3	ESR1;SMAD2;NCOA1;CTNNB1;TSC2;NOTCH1;GATA3;HDAC4;MED1;EP300;PDGFRA;PRKDC;RPTOR;FOXO1;PRKAA1;CLDN1;VIM;KLF4;ZEB1;HDAC1;AR;RPS6KB1;CAV1;CREBBP;ERBB2;STAT6;MTOR	MTOR;NOTCH1;ESR1;PDGFRA;HDAC4;CREBBP;CTNNB1;EGFR;VIM;RPS6KB1;TSC2;KLF4;ZEB1;NCOA1;FOXO1;STAT6;SMARCA4;PRKDC;YAP1	SMAD2;MED1;EZH2;TSC2;DNMT3B;KLF4;VIM	22		26	6	13	21
GO_REGULATION_OF_CELL_DEATH	15.697	21.886	11.57	20.927	32.757	24.851	29.431	10.26	41.298	22.236	43.178		17.911	42.265	40.02	22.612	26.746	20.225	3.785	FGFR1;SRC;RB1;TP53;ATG7;STAT1;AURKA;RELA;ITGA4;DEPTOR;ANXA1;FOS;BAD;LDHA;PIK3CA;JUN;KDM1A;PDGFRB;MAPK8;MED1;PTGS2;MYC		BAD;RPS6KB1;KIT;HDAC3;FOS;DNMT1;MTOR;ANXA1;ERBB3;TP53;ITGB1;IGF1R;AKT1S1;CAV1;NCOA1;MET;PRKAA1;GATA3;DEPTOR;CDKN1A;STAT3;JUN;BCL2L1;EGFR;ATM;SQSTM1;RELA	RELA;FBXO11;CAV1;FOS;SQSTM1;BAD;TP53	EGFR;GATA3;ATM;MET;BAD;RPS6KB1;NCOA1;STAT3;ERBB3;BCL2L1;DEPTOR;DNMT1;KIT;CAV1;HDAC3	BAX;MET;CHEK2;PRKDC;BAK1;ITGB1;NCOA1;PRKAA1;PTEN;MTOR;MAP2K6;CDKN1B;LRP6;ESR1;CREBBP;BRAF;RET;ITGA5;FOXO1;HDAC4;NOTCH1;SHC1;RPS6KB1;AKT1S1;CTNNB1;CDKN1A;KLF4;NFKBIA	BECN1;NCOA1;RB1;DEPTOR;MAP2K6;MAPK8;IKBKB;NFKBIA;EGFR;DNMT1;HDAC4;MET;FOXO1;MED1;PIK3CA;LRP6;CREBBP;KDR;ITGB1;CHEK2;RELA;YWHAZ;FBXO11;RPS6KB1;PIAS1;BAK1;KIT;ILK;KLF4;STAT3;ATM;CDKN1B;MTOR;CASP3;ERBB3;CAV1;HDAC3;BAD	FBXO11;BAD	ITGA5;AKT1S1;EGFR;CDKN1B;CREBBP;NCOA1;ITGB1;CAV1;PRKAA1;NFKBIA;CHEK2;MAP2K6;RELA;MTOR;RET;PTEN;NOTCH1;ILK;FOXO1;BAD;PRKDC;KLF4;MET;LRP6;BRAF;HDAC4;BAX;ATM;RPS6KB1;CDKN1A;CTNNB1		CDKN1B;STAT3;RELA;KIT;BAD;MED1;CREBBP;LRP6;RPS6KB1;CASP3;ERBB3;CHEK2;HDAC3;RB1;PIAS1;CAV1;MET;MAPK8;DNMT1;ILK;KDR;BECN1;ATM;FOXO1;MAP2K6;EGFR;MTOR;PIK3CA;DEPTOR;IKBKB;HDAC4;NCOA1;NFKBIA	JUN;AKT1S1;ANXA1;MTOR;CDKN1A;RELA;PRKAA1;TP53;FOS;EGFR;IGF1R;SQSTM1;ITGB1	HDAC4;RELA;PDGFRB;LRP6;TP53;ATG7;PRKDC;FOXO1;ITGA5;NFKBIA;KDM1A;CHEK2;YAP1;CREBBP;AURKA;EGFR;NOTCH1;STAT1;ITGA4;RB1;LDHA;KLF4;IKBKB;BRAF;KDR;MYC;JUN;KIT;STAT3;CASP3;PIK3CA;RET;ESR1;SQSTM1;MAPK8;DNMT1;ITGB1;RPS6KB1;HDAC3;CTNNB1;MAP2K6;FGFR1;NCOA1;BAD;MET;MTOR;FOS;CDKN1B;CDKN1A;ANXA1;PTGS2;DEPTOR;PIAS1	FOS;TP53;CAV1;RELA;SQSTM1	KDM1A;TP53;CASP3;HDAC3;STAT3;SRC;CHEK2;KIT;FGFR1;STAT1;RPS6KB1;LDHA;ITGA4;RELA;MAPK8;BAD;ATG7;AURKA;JUN;ALK;PDGFRB;KDR;FOS;ANXA1;RB1;IKBKB;PTGS2;PIK3CA;MYC;DEPTOR	AURKA;CHEK2;PDGFRB;HDAC4;BRAF;NFKBIA;RET;AKT1S1;ITGB1;TP53;CDKN1B;STAT1;KDM1A;PRKAA1;HDAC3;LDHA;PTEN;CTNNB1;CASP3;BAX;NCOA1;MTOR;PRKDC;MAP2K6;MYC;CREBBP;FGFR1;ALK;ITGA5;RPS6KB1;JUN;KDR;STAT3;FOS;LRP6;ATG7;IKBKB;DEPTOR;NOTCH1;PTGS2;SHC1;BAK1;PIK3CA;MAPK8;ESR1;BAD;RB1;KLF4;MET;ITGA4;FOXO1;CDKN1A;ANXA1;RELA;KIT;SRC		IKBKB;STAT1;DEPTOR;CHEK2;PTGS2;CASP3;LDHA;KIT;RPS6KB1;FOS;AURKA;PDGFRB;MAPK8;FGFR1;JUN;ANXA1;DNMT1;RET;ATG7;PIK3CA;BAD;TP53;SRC;RB1;KDR	RPS6KB1;BAX;HDAC4;LRP6;RB1;PDGFRB;KDR;TP53;CHEK2;PRKAA1;DEPTOR;DNMT1;ESR1;CDKN1B;CREBBP;AR;SRC;SQSTM1;PIK3CA;FOXO1;CAV1;HDAC1;AKT1S1;ITGA5;MED1;GATA3;MET;PTGS2;KIT;CASP3;PRKDC;AURKA;MTOR;BAD;ERBB3;ATG7;TWIST1;JUN;MAP2K6;NFKBIA;CDKN1A;NCOA1;ANXA1;BRAF;MAPK8;FOS;CTNNB1;KLF4;ITGB1;STAT1;RET;FGFR1;LDHA;IKBKB;NOTCH1	ATM;NCOA1;CTNNB1;ILK;FOXO1;PDGFRB;PRKAA1;HDAC4;ITGA4;BRAF;ITGB1;ATG7;MYC;FGFR1;PRKDC;CDKN1A;ANXA1;MET;ITGA5;KDM1A;PTEN;MTOR;DEPTOR;CAV1;FOS;MED1;CREBBP;PIK3CA;NOTCH1;LRP6;MAPK8;RELA;SRC;KLF4;MAP2K6;AURKA;RET;CDKN1B;PTGS2;EGFR;LDHA;STAT1;BAX;CHEK2;JUN;NFKBIA;BAD;RPS6KB1;AKT1S1;TP53;RB1	ATG7;PIAS1;PIK3CA;KDR;BAD;RB1;PTGS2;RELA;DNMT1;SQSTM1;ANXA1;ITGA4;KIT;IKBKB;LDHA;STAT1;MAPK8;CHEK2;STAT3;DEPTOR;JUN;FOS;PDGFRB;KDM1A;FGFR1;TP53;MYC;RPS6KB1;HDAC3;CASP3;AURKA;RET	ESR1;BRAF;NCOA1;SQSTM1;ITGA5;CTNNB1;CDKN1A;NOTCH1;GATA3;MET;BAX;HDAC4;MED1;NFKBIA;PRKDC;LRP6;TWIST1;ERBB3;ITGB1;RET;FOXO1;PRKAA1;BAD;CHEK2;KLF4;AKT1S1;HDAC1;MAP2K6;AR;RPS6KB1;CAV1;CREBBP;CDKN1B;MTOR	MTOR;NOTCH1;ESR1;HDAC4;CREBBP;RET;CTNNB1;EGFR;CDKN1A;MAP2K6;NFKBIA;RPS6KB1;MET;KLF4;CHEK2;NCOA1;FOXO1;ITGB1;PRKDC;BRAF;CDKN1B;LRP6;ITGA5;YAP1	ITGB1;MED1;FBXO11;KLF4;BAK1;YWHAZ	22		27	7	15	28
GO_CELLULAR_RESPONSE_TO_OXYGEN_CONTAINING_COMPOUND	17.154	20.964	8.545	16.943	21.782	19.205	18.945	13.074	36.987	19.626	35.576		15.976	32.02	35.453	20.412	20.28	20.225	4.375	SMARCC1;SRC;KAT2B;TP53;STAT1;STAT5A;EIF4EBP1;RELA;ITGA4;SMARCA4;ANXA1;FOS;BAD;PIK3CA;JUN;KDM1A;PDGFRB;MAPK8;MED1;DNMT3B;PTGS2		BAD;RPS6KB1;FOS;DNMT1;MTOR;ANXA1;TP53;STAT6;IGF1R;PDGFRA;CAV1;MET;SOCS1;PRKAA1;RPTOR;DNMT3B;STAT3;JUN;BCL2L1;EGFR;VIM;ATM;STAT5A;RELA	RELA;CAV1;FOS;BAD;RPTOR;CHUK;TP53	EGFR;PDGFRA;ATM;MET;BAD;RPS6KB1;RPTOR;STAT3;BCL2L1;DNMT1;CAV1	MET;TSC2;MAP1LC3A;PRKDC;CHEK2;CLDN1;PDGFRA;PRKAA1;PTEN;MTOR;MAP2K6;LRP6;ESR1;VIM;RET;FOXO1;STAT6;SHC1;RPS6KB1;CTNNB1;KLF4;NFKBIA	TSC2;EIF4EBP1;DNMT3B;VIM;MAPK8;NFKBIA;EGFR;DNMT1;MET;FOXO1;MED1;PIK3CA;LRP6;RELA;CHEK2;RPS6KB1;STAT6;EZH2;KLF4;STAT3;NCOA3;ATM;MTOR;RPTOR;CAV1;MAP2K6;BAD		MAP1LC3A;STAT6;EGFR;TSC2;PRKAA1;CAV1;NFKBIA;CHEK2;MAP2K6;RELA;MTOR;RET;PTEN;FOXO1;BAD;PRKDC;RPTOR;KLF4;MET;LRP6;VIM;ATM;RPS6KB1;CTNNB1		STAT3;RELA;BAD;MED1;LRP6;RPS6KB1;CHEK2;TSC2;STAT6;CAV1;MET;MAPK8;DNMT1;NCOA3;ATM;FOXO1;MAP2K6;RPTOR;EGFR;MTOR;PIK3CA;EIF4EBP1;NFKBIA	JUN;SOCS1;VIM;STAT5A;ANXA1;MTOR;RELA;PRKAA1;TP53;DNMT3B;STAT6;FOS;EGFR;IGF1R	VIM;SMARCC1;RELA;MAP1LC3A;PDGFRB;KAT2B;STAT5A;LRP6;TP53;PRKDC;FOXO1;CHUK;NFKBIA;KDM1A;CHEK2;YAP1;STAT1;EGFR;SMARCA4;STAT6;ZEB1;ITGA4;KLF4;JUN;STAT3;RPTOR;PIK3CA;RET;ESR1;MAPK8;DNMT1;RPS6KB1;DNMT3B;NCOA3;CTNNB1;PDGFRA;MAP2K6;BAD;CBX3;MET;TSC2;MTOR;FOS;ANXA1;PTGS2	FOS;RPTOR;TP53;CAV1;CHUK;RELA	STAT5A;KDM1A;TP53;STAT3;SRC;CHEK2;NCOA3;STAT1;DNMT3B;RPS6KB1;ITGA4;RELA;MAPK8;BAD;EIF4EBP1;JUN;ALK;SMARCC1;PDGFRB;FOS;ANXA1;KAT2B;PTGS2;CHUK;PIK3CA	CHEK2;CLDN1;PDGFRB;NCOA3;NFKBIA;STAT5A;RET;KDM1A;TP53;CHUK;STAT1;PRKAA1;PDGFRA;PTEN;CTNNB1;VIM;MTOR;PRKDC;MAP1LC3A;MAP2K6;ALK;TSC2;EIF4EBP1;RPS6KB1;JUN;STAT3;FOS;LRP6;STAT6;KAT2B;PTGS2;SHC1;PIK3CA;MAPK8;ESR1;BAD;DNMT3B;KLF4;MET;ITGA4;FOXO1;ANXA1;RELA;SMARCC1;SRC		STAT1;KAT2B;CHEK2;PTGS2;STAT5A;STAT6;RPS6KB1;FOS;MAPK8;PDGFRB;JUN;ANXA1;EIF4EBP1;DNMT1;RET;PIK3CA;BAD;SMARCC1;TP53;SRC;DNMT3B	MAP1LC3A;RPS6KB1;LRP6;STAT6;PDGFRB;TP53;CHEK2;ZEB1;PRKAA1;DNMT1;ESR1;KAT2B;AR;SRC;TSC2;PIK3CA;FOXO1;CAV1;CLDN1;MED1;MET;RPTOR;DNMT3B;PTGS2;PRKDC;STAT5A;EIF4EBP1;MTOR;BAD;SMARCC1;JUN;MAP2K6;VIM;NFKBIA;ANXA1;FOS;MAPK8;CTNNB1;STAT1;RET;KLF4;PDGFRA	DNMT3B;ATM;CTNNB1;FOXO1;SMARCA4;PDGFRB;PRKAA1;ITGA4;EIF4EBP1;MAP1LC3A;TSC2;PRKDC;ANXA1;MET;KDM1A;RPS6KB1;MTOR;CAV1;FOS;MED1;KAT2B;SMARCC1;RPTOR;PIK3CA;LRP6;STAT6;MAPK8;RELA;SRC;MAP2K6;RET;VIM;PTGS2;EGFR;STAT1;JUN;NFKBIA;BAD;STAT5A;KLF4;PTEN;TP53;CHEK2	PIK3CA;DNMT3B;BAD;PTGS2;RELA;DNMT1;ANXA1;ITGA4;STAT1;MAPK8;CHEK2;STAT3;JUN;STAT6;NCOA3;FOS;PDGFRB;KDM1A;SMARCC1;CHUK;STAT5A;CBX3;RPTOR;KAT2B;TP53;RPS6KB1;RET	ESR1;CTNNB1;MAP1LC3A;TSC2;MET;MED1;NFKBIA;PDGFRA;PRKDC;RPTOR;LRP6;RET;FOXO1;PRKAA1;CLDN1;BAD;CHEK2;VIM;KLF4;ZEB1;MAP2K6;AR;RPS6KB1;CAV1;STAT6;MTOR	MTOR;PDGFRA;ESR1;RET;CTNNB1;EGFR;MAP2K6;NFKBIA;VIM;RPS6KB1;TSC2;MET;KLF4;ZEB1;CHEK2;FOXO1;STAT6;SMARCA4;PRKDC;LRP6;MAP1LC3A;YAP1	MED1;EZH2;TSC2;DNMT3B;KLF4;VIM	21		24	7	11	22
GO_REGULATION_OF_CELL_POPULATION_PROLIFERATION	12.256	20.564	10.608	20.26	24.481	22.314	22.322	10.26	31.122	15.398	36.925		12.316	38.481	33.607	14.853	26.746	16.02	4.619	STAT2;BRCA2;FGFR1;SRC;KAT2B;RB1;TP53;STAT1;STAT5A;RELA;ITGA4;ANXA1;BAD;JUN;KDM1A;PDGFRB;MED1;PTGS2;MYC		BAD;ERBB2;KIT;DNMT1;MTOR;ANXA1;ERBB3;TP53;ITGB1;STAT6;IGF1R;PDGFRA;CAV1;PRKAA1;GATA3;SMAD2;CDKN1A;RPTOR;STAT3;JUN;BCL2L1;EGFR;ATM;STAT4;STAT5A;RELA	RELA;CAV1;BAD;ERBB2;RPTOR;TP53	EGFR;PDGFRA;GATA3;SMAD2;ATM;BAD;RPTOR;STAT3;ERBB3;BCL2L1;ERBB2;DNMT1;KIT;CAV1	BAX;TSC2;ERBB2;PRKDC;ASH2L;BAK1;ITGB1;SIRT6;CLDN1;PDGFRA;SMAD2;PRKAA1;PTEN;MTOR;CDKN1B;LRP6;ESR1;FOXO1;HDAC4;NOTCH1;STAT6;SHC1;CTNNB1;CDKN1A;KLF4;MAP2K1;NFKBIA	TSC2;SMAD2;RB1;CTBP2;NFKBIA;EGFR;DNMT1;HDAC4;SIRT6;FOXO1;MED1;LRP6;KDR;ITGB1;RELA;PIAS1;BAK1;KIT;ERBB2;STAT6;ILK;EZH2;KLF4;STAT3;ATM;CDKN1B;MTOR;CASP3;RPTOR;ERBB3;CAV1;BAD		SIRT6;STAT6;CDKN1B;EGFR;TSC2;PGR;ITGB1;CAV1;PRKAA1;NFKBIA;RELA;MTOR;PTEN;NOTCH1;ILK;FOXO1;BAD;PRKDC;ERBB2;RPTOR;KLF4;LRP6;SMAD2;HDAC4;BAX;MAP2K1;ATM;CDKN1A;CTNNB1		CDKN1B;CTBP2;STAT3;RELA;KIT;BAD;MED1;LRP6;CASP3;ERBB3;TSC2;RB1;NFKBIA;ERBB2;STAT6;PIAS1;CAV1;DNMT1;ILK;KDR;ATM;FOXO1;RPTOR;EGFR;MTOR;HDAC4;SIRT6;SMAD2	JUN;ANXA1;STAT5A;MTOR;STAT4;CDKN1A;RELA;PRKAA1;TP53;STAT6;EGFR;IGF1R;ITGB1	HDAC4;RELA;PDGFRB;MAP2K1;KAT2B;STAT5A;LRP6;TP53;PRKDC;FOXO1;NFKBIA;KDM1A;YAP1;STAT1;EGFR;NOTCH1;STAT6;ITGA4;ZEB1;RB1;KLF4;KDR;MYC;JUN;KIT;BRCA2;STAT3;CASP3;RPTOR;ESR1;DNMT1;ITGB1;CTNNB1;PDGFRA;FGFR1;BAD;TSC2;STAT2;MTOR;CDKN1B;ASH2L;CDKN1A;ANXA1;PTGS2;PIAS1	ERBB2;RPTOR;TP53;CAV1;RELA	STAT5A;KDM1A;TP53;CASP3;STAT3;SRC;KIT;FGFR1;STAT1;STAT4;BRCA2;STAT2;ITGA4;RELA;BAD;JUN;ALK;PDGFRB;KDR;ANXA1;KAT2B;RB1;PTGS2;MYC	BRCA2;CLDN1;PDGFRB;HDAC4;NFKBIA;STAT5A;ITGB1;KDM1A;TP53;CDKN1B;STAT1;PRKAA1;PDGFRA;PTEN;CTNNB1;CASP3;BAX;MTOR;STAT2;SIRT6;PRKDC;ERBB2;MYC;FGFR1;ALK;TSC2;JUN;KDR;STAT3;STAT4;LRP6;ASH2L;STAT6;KAT2B;NOTCH1;PTGS2;SHC1;BAK1;SMAD2;ESR1;BAD;RB1;KLF4;MAP2K1;ITGA4;FOXO1;CDKN1A;ANXA1;RELA;KIT;SRC		STAT1;KAT2B;PTGS2;CASP3;STAT5A;STAT2;STAT6;KIT;FGFR1;PDGFRB;JUN;ANXA1;STAT4;DNMT1;BRCA2;BAD;TP53;SRC;RB1;KDR	FGFR1;BAX;LRP6;HDAC4;RB1;STAT6;PDGFRB;KDR;TP53;ZEB1;PRKAA1;DNMT1;ESR1;CDKN1B;KAT2B;AR;SRC;TSC2;MAP2K1;ASH2L;CAV1;HDAC1;FOXO1;CLDN1;STAT2;MED1;GATA3;RPTOR;STAT4;PTGS2;KIT;CASP3;PRKDC;STAT5A;MTOR;BAD;ERBB3;TWIST1;JUN;NFKBIA;CDKN1A;ANXA1;CTNNB1;SMAD2;KLF4;ITGB1;STAT1;BRCA2;SIRT6;PDGFRA;ERBB2;NOTCH1	ERBB2;ATM;CTNNB1;ILK;FOXO1;PDGFRB;PRKAA1;HDAC4;ITGA4;SIRT6;TSC2;ITGB1;MYC;FGFR1;PRKDC;CDKN1A;ANXA1;KDM1A;MTOR;CAV1;MED1;KAT2B;STAT2;RPTOR;PGR;NOTCH1;LRP6;STAT6;RELA;MAP2K1;SRC;BRCA2;CDKN1B;PTGS2;EGFR;SMAD2;STAT1;BAX;JUN;NFKBIA;BAD;STAT5A;KLF4;PTEN;TP53;RB1	PIAS1;KDR;BAD;RB1;PTGS2;RELA;DNMT1;ANXA1;ITGA4;KIT;STAT1;STAT3;JUN;STAT6;PDGFRB;KDM1A;STAT5A;BRCA2;RPTOR;FGFR1;KAT2B;TP53;MYC;CASP3;STAT2	ESR1;MAP2K1;SMAD2;CTNNB1;TSC2;CDKN1A;NOTCH1;GATA3;BAX;HDAC4;MED1;ASH2L;NFKBIA;PDGFRA;PRKDC;RPTOR;LRP6;TWIST1;ERBB3;ITGB1;FOXO1;PRKAA1;SIRT6;CLDN1;BAD;KLF4;ZEB1;HDAC1;AR;CAV1;ERBB2;STAT6;CDKN1B;MTOR	MTOR;NOTCH1;ESR1;PDGFRA;HDAC4;CTNNB1;EGFR;CDKN1A;NFKBIA;ASH2L;MAP2K1;TSC2;KLF4;ZEB1;FOXO1;STAT6;ITGB1;PRKDC;CDKN1B;LRP6;YAP1	ITGB1;SMAD2;MED1;EZH2;TSC2;KLF4;BAK1	19		26	6	14	27
GO_NEGATIVE_REGULATION_OF_CELL_DEATH	12.239	19.94	10.565	14.793	26.535	19.68	24.965	9.934	33.682	17.582	32.558		13.747	35.425	30.749	18.666	22.333	14.611	2.916	PIK3CA;RB1;TP53;ANXA1;JUN;ATG7;KDM1A;PDGFRB;BAD;AURKA;MAPK8;MED1;SRC;RELA;PTGS2;MYC		BAD;RPS6KB1;KIT;HDAC3;DNMT1;MTOR;ANXA1;ERBB3;TP53;ITGB1;IGF1R;CAV1;MET;PRKAA1;GATA3;CDKN1A;STAT3;JUN;BCL2L1;EGFR;SQSTM1;RELA	RELA;CAV1;SQSTM1;BAD;TP53	EGFR;GATA3;MET;BAD;RPS6KB1;STAT3;ERBB3;BCL2L1;DNMT1;KIT;CAV1;HDAC3	BAX;MET;PRKDC;ITGB1;PRKAA1;PTEN;MTOR;CDKN1B;LRP6;BRAF;ITGA5;FOXO1;NOTCH1;SHC1;RPS6KB1;CTNNB1;CDKN1A;KLF4;NFKBIA	BECN1;RB1;MAPK8;IKBKB;NFKBIA;EGFR;DNMT1;MET;FOXO1;MED1;PIK3CA;LRP6;KDR;ITGB1;RELA;YWHAZ;RPS6KB1;PIAS1;KIT;ILK;KLF4;STAT3;CDKN1B;MTOR;CASP3;ERBB3;CAV1;HDAC3;BAD		ITGA5;CDKN1B;EGFR;ITGB1;CAV1;PRKAA1;NFKBIA;RELA;MTOR;PTEN;NOTCH1;ILK;FOXO1;BAD;PRKDC;KLF4;MET;LRP6;BRAF;BAX;RPS6KB1;CDKN1A;CTNNB1		CDKN1B;STAT3;RELA;KIT;BAD;MED1;LRP6;RPS6KB1;CASP3;ERBB3;HDAC3;RB1;PIAS1;CAV1;MET;MAPK8;DNMT1;ILK;KDR;BECN1;FOXO1;EGFR;MTOR;PIK3CA;IKBKB;NFKBIA	JUN;ANXA1;MTOR;CDKN1A;RELA;PRKAA1;TP53;EGFR;IGF1R;SQSTM1;ITGB1	RELA;PDGFRB;LRP6;TP53;ATG7;PRKDC;FOXO1;ITGA5;NFKBIA;KDM1A;YAP1;AURKA;EGFR;NOTCH1;RB1;KLF4;IKBKB;BRAF;KDR;MYC;JUN;KIT;STAT3;CASP3;PIK3CA;SQSTM1;MAPK8;DNMT1;ITGB1;RPS6KB1;HDAC3;CTNNB1;BAD;MET;MTOR;CDKN1B;CDKN1A;ANXA1;PTGS2;PIAS1	TP53;SQSTM1;CAV1;RELA	KDM1A;TP53;CASP3;HDAC3;STAT3;SRC;KIT;RPS6KB1;RELA;MAPK8;BAD;ATG7;AURKA;JUN;PDGFRB;KDR;ANXA1;RB1;IKBKB;PTGS2;PIK3CA;MYC	AURKA;PDGFRB;NFKBIA;BRAF;ITGB1;KDM1A;TP53;CDKN1B;PRKAA1;HDAC3;PTEN;CTNNB1;CASP3;BAX;MTOR;PRKDC;MYC;ITGA5;RPS6KB1;JUN;KDR;STAT3;LRP6;ATG7;IKBKB;NOTCH1;PTGS2;SHC1;PIK3CA;MAPK8;BAD;RB1;KLF4;MET;FOXO1;CDKN1A;ANXA1;RELA;KIT;SRC		IKBKB;ANXA1;ATG7;PIK3CA;BAD;TP53;SRC;KIT;RPS6KB1;RB1;MAPK8;DNMT1;AURKA;KDR;PTGS2;PDGFRB;CASP3;JUN	RPS6KB1;BAX;LRP6;RB1;PDGFRB;KDR;TP53;PRKAA1;DNMT1;CDKN1B;AR;SRC;SQSTM1;PIK3CA;FOXO1;CAV1;HDAC1;ITGA5;MED1;GATA3;MET;PTGS2;KIT;CASP3;PRKDC;AURKA;MTOR;BAD;ERBB3;ATG7;TWIST1;JUN;NFKBIA;CDKN1A;BRAF;ANXA1;CTNNB1;MAPK8;ITGB1;KLF4;IKBKB;NOTCH1	CTNNB1;ILK;FOXO1;PDGFRB;PRKAA1;BRAF;ITGB1;ATG7;MYC;PRKDC;CDKN1A;ANXA1;MET;ITGA5;KDM1A;RPS6KB1;MTOR;CAV1;MED1;PIK3CA;NOTCH1;LRP6;MAPK8;RELA;SRC;AURKA;CDKN1B;PTGS2;EGFR;BAX;JUN;NFKBIA;BAD;KLF4;PTEN;TP53;RB1	ATG7;PIAS1;PIK3CA;KDR;BAD;RB1;PTGS2;RELA;DNMT1;SQSTM1;ANXA1;KIT;IKBKB;MAPK8;STAT3;JUN;PDGFRB;KDM1A;TP53;MYC;RPS6KB1;HDAC3;CASP3;AURKA	BRAF;SQSTM1;ITGA5;CTNNB1;CDKN1A;NOTCH1;GATA3;MET;BAX;MED1;NFKBIA;PRKDC;LRP6;TWIST1;ERBB3;ITGB1;FOXO1;PRKAA1;BAD;KLF4;HDAC1;AR;RPS6KB1;CAV1;CDKN1B;MTOR	MTOR;NOTCH1;FOXO1;ITGB1;EGFR;PRKDC;KLF4;BRAF;CDKN1B;LRP6;CTNNB1;RPS6KB1;CDKN1A;MET;ITGA5;YAP1;NFKBIA	MED1;KLF4;YWHAZ;ITGB1	16		22	5	12	19
GO_ENZYME_LINKED_RECEPTOR_PROTEIN_SIGNALING_PATHWAY	6.46	19.262	8.973	14.273	14.189	16.506	14.695	10.884	17.998	11.161	24.993		10.999	26.446	22.104	9.191	17.757	11.572	2.01	SMARCC1;PIK3CA;EIF4EBP1;TP53;FOS;JUN;PDGFRB;STAT5A;FGFR1;SRC;RELA		RPS6KB1;ERBB2;KIT;FOS;ERBB3;TP53;STAT6;IGF1R;PDGFRA;AKT1S1;CAV1;MET;SOCS1;PRKAA1;GATA3;SMAD2;STAT3;JUN;EGFR;VIM;STAT5A;RELA	RELA;CAV1;FOS;ERBB2;TP53	EGFR;PDGFRA;SMAD2;GATA3;MET;RPS6KB1;STAT3;ERBB3;ERBB2;KIT;CAV1	MET;TSC2;ERBB2;PDGFRA;SMAD2;PRKAA1;PTEN;CREBBP;BRAF;VIM;RET;ITGA5;FOXO1;NOTCH1;STAT6;SHC1;RPS6KB1;AKT1S1;CTNNB1	TSC2;SMAD2;EIF4EBP1;VIM;EGFR;MET;FOXO1;PIK3CA;CREBBP;KDR;RELA;RPS6KB1;KIT;ERBB2;STAT6;ILK;STAT3;CASP3;ERBB3;CAV1		ITGA5;STAT6;AKT1S1;EGFR;CREBBP;TSC2;CAV1;PRKAA1;RELA;RET;PTEN;NOTCH1;ILK;FOXO1;ERBB2;MET;SMAD2;BRAF;VIM;RPS6KB1;CTNNB1		STAT3;RELA;KIT;CREBBP;RPS6KB1;CASP3;ERBB3;TSC2;ERBB2;STAT6;CAV1;MET;ILK;KDR;FOXO1;EGFR;PIK3CA;EIF4EBP1;SMAD2	JUN;SOCS1;VIM;STAT5A;RELA;PRKAA1;TP53;STAT6;FOS;EGFR;IGF1R;AKT1S1	VIM;SMARCC1;RELA;PDGFRB;STAT5A;TP53;FOXO1;ITGA5;CREBBP;EGFR;NOTCH1;STAT6;ZEB1;BRAF;KDR;JUN;KIT;STAT3;CASP3;PIK3CA;RET;RPS6KB1;CTNNB1;PDGFRA;FGFR1;MET;TSC2;FOS	FOS;ERBB2;TP53;CAV1;RELA	STAT5A;SMARCC1;PDGFRB;TP53;KDR;FOS;RPS6KB1;CASP3;PIK3CA;RELA;EIF4EBP1;STAT3;SRC;JUN;ALK;KIT;FGFR1	PDGFRB;BRAF;RET;AKT1S1;STAT5A;TP53;PRKAA1;PDGFRA;PTEN;CTNNB1;CASP3;VIM;ERBB2;CREBBP;FGFR1;ALK;ITGA5;RPS6KB1;JUN;KDR;TSC2;EIF4EBP1;STAT3;FOS;STAT6;NOTCH1;SHC1;PIK3CA;SMAD2;MET;FOXO1;RELA;SMARCC1;KIT;SRC		FGFR1;EIF4EBP1;PIK3CA;SMARCC1;STAT6;TP53;KIT;RPS6KB1;SRC;FOS;RET;KDR;STAT5A;PDGFRB;CASP3;JUN	RPS6KB1;EP300;STAT6;PDGFRB;KDR;TP53;ZEB1;PRKAA1;CREBBP;AR;SRC;TSC2;PIK3CA;FOXO1;CAV1;AKT1S1;ITGA5;GATA3;MET;KIT;CASP3;STAT5A;EIF4EBP1;ERBB3;SMARCC1;JUN;VIM;BRAF;FOS;CTNNB1;SMAD2;RET;FGFR1;PDGFRA;ERBB2;NOTCH1	ERBB2;CTNNB1;ILK;FOXO1;PDGFRB;PRKAA1;EIF4EBP1;BRAF;TSC2;FGFR1;AKT1S1;MET;ITGA5;CAV1;FOS;CREBBP;SMARCC1;PIK3CA;NOTCH1;STAT6;RELA;SRC;RET;VIM;EGFR;SMAD2;JUN;STAT5A;RPS6KB1;PTEN;TP53	PIK3CA;STAT6;PDGFRB;FOS;FGFR1;SMARCC1;KDR;STAT5A;TP53;RPS6KB1;CASP3;RELA;STAT3;RET;KIT;JUN	BRAF;SMAD2;ITGA5;CTNNB1;TSC2;NOTCH1;GATA3;MET;EP300;PDGFRA;ERBB3;RET;FOXO1;PRKAA1;VIM;ZEB1;AKT1S1;AR;RPS6KB1;CAV1;CREBBP;ERBB2;STAT6	NOTCH1;PDGFRA;FOXO1;STAT6;EGFR;CREBBP;RET;BRAF;VIM;CTNNB1;RPS6KB1;TSC2;ITGA5;MET;ZEB1	TSC2;SMAD2;VIM	11		22	5	11	19
GO_POSITIVE_REGULATION_OF_PROTEIN_METABOLIC_PROCESS	8.115	19.114	10.574	18.771	24.354	23.437	20.958	8.895	28.419	14.179	31.887		11.198	30.881	29.779	15.772	22.855	14.664	3.028	PIK3CA;TP53;JUN;ATG7;KDM1A;PDGFRB;BAD;RELA;AURKA;MAPK8;FGFR1;SRC;DNMT3B;PTGS2;MYC		BAD;RPS6KB1;ERBB2;KIT;HDAC3;DNMT1;MTOR;ERBB3;TP53;IGF1R;PDGFRA;CAV1;SOCS1;PRKAA1;GATA3;CDKN1A;RPTOR;DNMT3B;STAT3;JUN;EGFR;VIM;ATM;SQSTM1;RELA	RELA;CAV1;SQSTM1;BAD;ERBB2;RPTOR;TP53	EGFR;PDGFRA;GATA3;ATM;BAD;RPS6KB1;RPTOR;STAT3;ERBB3;ERBB2;DNMT1;KIT;CAV1;HDAC3	BAX;ERBB2;CHEK2;PRKDC;BAK1;SIRT6;PDGFRA;PRKAA1;PTEN;MTOR;MAP2K6;CDKN1B;BRAF;VIM;RET;ITGA5;FOXO1;HDAC4;NOTCH1;SHC1;RPS6KB1;CTNNB1;CDKN1A;KLF4;MAP2K1;NFKBIA	DNMT3B;VIM;MAP2K6;MAPK8;NFKBIA;EGFR;DNMT1;HDAC4;SIRT6;FOXO1;PIK3CA;KDR;RELA;CHEK2;RPS6KB1;PIAS1;BAK1;KIT;ERBB2;ILK;EZH2;KLF4;STAT3;ATM;CDKN1B;MTOR;CASP3;RPTOR;ERBB3;CAV1;HDAC3;BAD		ITGA5;SIRT6;CDKN1B;EGFR;CAV1;PRKAA1;NFKBIA;CHEK2;MAP2K6;RELA;MTOR;RET;PTEN;NOTCH1;ILK;FOXO1;BAD;PRKDC;ERBB2;RPTOR;KLF4;BRAF;HDAC4;BAX;VIM;MAP2K1;ATM;RPS6KB1;CDKN1A;CTNNB1		CDKN1B;STAT3;RELA;KIT;BAD;RPS6KB1;CASP3;ERBB3;CHEK2;HDAC3;NFKBIA;ERBB2;PIAS1;CAV1;MAPK8;DNMT1;ILK;KDR;ATM;FOXO1;MAP2K6;RPTOR;EGFR;MTOR;PIK3CA;HDAC4;SIRT6	JUN;SOCS1;VIM;MTOR;CDKN1A;RELA;PRKAA1;TP53;DNMT3B;EGFR;IGF1R;SQSTM1	HDAC4;VIM;RELA;PDGFRB;MAP2K1;TP53;ATG7;PRKDC;FOXO1;ITGA5;NFKBIA;KDM1A;CHEK2;AURKA;EGFR;NOTCH1;KLF4;BRAF;KDR;MYC;JUN;KIT;STAT3;CASP3;RPTOR;PIK3CA;RET;SQSTM1;MAPK8;DNMT1;RPS6KB1;DNMT3B;HDAC3;CTNNB1;PDGFRA;FGFR1;MAP2K6;BAD;MTOR;CDKN1B;CDKN1A;PTGS2;PIAS1	ERBB2;RPTOR;TP53;CAV1;RELA;SQSTM1	KDM1A;TP53;CASP3;HDAC3;STAT3;SRC;CHEK2;KIT;FGFR1;DNMT3B;RPS6KB1;RELA;MAPK8;BAD;ATG7;AURKA;JUN;ALK;PDGFRB;KDR;PTGS2;PIK3CA;MYC	AURKA;CHEK2;PDGFRB;HDAC4;BRAF;NFKBIA;RET;KDM1A;TP53;CDKN1B;PRKAA1;HDAC3;PDGFRA;PTEN;BAX;CASP3;CTNNB1;VIM;MTOR;SIRT6;PRKDC;MAP2K6;ERBB2;MYC;FGFR1;ALK;ITGA5;RPS6KB1;JUN;KDR;STAT3;ATG7;NOTCH1;PTGS2;SHC1;BAK1;PIK3CA;MAPK8;BAD;DNMT3B;KLF4;MAP2K1;FOXO1;CDKN1A;RELA;KIT;SRC		CHEK2;PTGS2;CASP3;KIT;RPS6KB1;AURKA;PDGFRB;MAPK8;FGFR1;JUN;DNMT1;RET;ATG7;PIK3CA;BAD;TP53;SRC;DNMT3B;KDR	RPS6KB1;FGFR1;BAX;HDAC4;PDGFRB;KDR;TP53;CHEK2;PRKAA1;DNMT1;CDKN1B;AR;SRC;SQSTM1;PIK3CA;MAP2K1;CAV1;FOXO1;ITGA5;GATA3;RPTOR;DNMT3B;PTGS2;TNFSF11;KIT;CASP3;PRKDC;AURKA;MTOR;BAD;ERBB3;ATG7;JUN;MAP2K6;VIM;CDKN1A;NFKBIA;BRAF;CTNNB1;MAPK8;KLF4;RET;SIRT6;PDGFRA;ERBB2;NOTCH1	ERBB2;DNMT3B;ATM;CTNNB1;ILK;FOXO1;PDGFRB;PRKAA1;HDAC4;SIRT6;BRAF;ATG7;MYC;FGFR1;PRKDC;CDKN1A;ITGA5;KDM1A;MTOR;CAV1;RPTOR;PIK3CA;NOTCH1;MAPK8;RELA;MAP2K1;SRC;KLF4;MAP2K6;AURKA;RET;VIM;CDKN1B;PTGS2;EGFR;BAX;JUN;NFKBIA;BAD;RPS6KB1;PTEN;TP53;CHEK2	ATG7;PIAS1;PIK3CA;DNMT3B;KDR;BAD;PTGS2;RELA;DNMT1;SQSTM1;KIT;MAPK8;CHEK2;STAT3;JUN;PDGFRB;KDM1A;RPTOR;FGFR1;TP53;MYC;RPS6KB1;HDAC3;CASP3;AURKA;RET	MAP2K1;BRAF;SQSTM1;ITGA5;CTNNB1;CDKN1A;NOTCH1;GATA3;BAX;HDAC4;NFKBIA;PDGFRA;PRKDC;RPTOR;ERBB3;RET;FOXO1;TNFSF11;PRKAA1;SIRT6;BAD;CHEK2;VIM;KLF4;MAP2K6;AR;RPS6KB1;CAV1;ERBB2;CDKN1B;MTOR	MTOR;NOTCH1;PDGFRA;HDAC4;RET;CTNNB1;EGFR;CDKN1A;MAP2K6;NFKBIA;MAP2K1;VIM;RPS6KB1;KLF4;CHEK2;FOXO1;PRKDC;BRAF;CDKN1B;ITGA5	EZH2;KLF4;DNMT3B;BAK1;VIM	15		25	7	14	26
GO_REGULATION_OF_INTRACELLULAR_SIGNAL_TRANSDUCTION	7.763	18.444	11.397	15.701	19.85	18.978	16.398	7.417	23.927	12.594	28.257		8.814	28.501	25.089	14.14	22.04	10.736	3.658	EHMT2;PIK3CA;DEPTOR;TP53;JUN;KDM1A;PDGFRB;STAT1;BAD;AURKA;FGFR1;SRC;RELA;PTGS2;MYC		BAD;ERBB2;KIT;HDAC3;MTOR;ERBB3;TP53;ITGB1;IGF1R;PDGFRA;AKT1S1;CAV1;MET;PRKAA1;GATA3;PRKAB1;DEPTOR;RPTOR;JUN;CHEK1;BCL2L1;EGFR;ATM;SQSTM1;RELA	CHEK1;RELA;ATR;CAV1;SQSTM1;BAD;ERBB2;RPTOR;CHUK;TP53	EGFR;PDGFRA;GATA3;ATM;CHEK1;BAD;MET;RPTOR;ERBB3;BCL2L1;DEPTOR;ERBB2;KIT;CAV1;HDAC3	BAX;MET;TSC2;ERBB2;ATR;CHEK2;ITGB1;PDGFRA;PRKAA1;PTEN;MTOR;MAP2K6;ESR1;BRAF;RET;FOXO1;NOTCH1;NFKBIA;SHC1;AKT1S1;CTNNB1;KLF4;MAP2K1;CHEK1	TSC2;BECN1;DEPTOR;MAP2K6;NFKBIA;IKBKB;EGFR;MET;FOXO1;PIK3CA;KDR;ITGB1;RELA;CHEK2;YWHAZ;KIT;ERBB2;ILK;EZH2;PRKAB1;KLF4;CHEK1;ATM;MTOR;RPTOR;ERBB3;CAV1;HDAC3;BAD		AKT1S1;EGFR;TSC2;ITGB1;PRKAA1;CAV1;NFKBIA;CHEK2;MAP2K6;RELA;MTOR;RET;PTEN;CHEK1;NOTCH1;ILK;FOXO1;BAD;ERBB2;RPTOR;KLF4;MET;BRAF;BAX;MAP2K1;ATM;CTNNB1		RELA;KIT;BAD;ERBB3;CHEK2;TSC2;HDAC3;ERBB2;CAV1;MET;ILK;KDR;BECN1;ATM;CHEK1;MAP2K6;FOXO1;RPTOR;EGFR;MTOR;PIK3CA;DEPTOR;IKBKB;NFKBIA	JUN;AKT1S1;MTOR;PRKAB1;RELA;PRKAA1;TP53;EGFR;IGF1R;SQSTM1;ITGB1	RELA;PDGFRB;MAP2K1;CHEK1;TP53;EHMT2;FOXO1;CHUK;NFKBIA;KDM1A;CHEK2;AURKA;EGFR;NOTCH1;STAT1;KLF4;IKBKB;BRAF;KDR;MYC;JUN;KIT;RPTOR;PIK3CA;RET;ESR1;SQSTM1;ITGB1;HDAC3;CTNNB1;PDGFRA;FGFR1;MAP2K6;BAD;MET;TSC2;MTOR;ATR;PTGS2;DEPTOR	CHEK1;ERBB2;RPTOR;TP53;CAV1;CHUK;RELA;ATR;SQSTM1	KDM1A;TP53;HDAC3;SRC;CHEK2;KIT;FGFR1;STAT1;EHMT2;RELA;BAD;AURKA;JUN;ALK;PDGFRB;KDR;IKBKB;PTGS2;CHUK;PIK3CA;MYC;DEPTOR	AURKA;ATR;CHEK2;PDGFRB;CHEK1;NFKBIA;BRAF;RET;AKT1S1;ITGB1;TP53;CHUK;STAT1;KDM1A;PRKAA1;HDAC3;PDGFRA;PTEN;CTNNB1;BAX;MTOR;EHMT2;MAP2K6;ERBB2;MYC;FGFR1;ALK;TSC2;JUN;KDR;IKBKB;DEPTOR;NOTCH1;PTGS2;SHC1;PIK3CA;ESR1;BAD;KLF4;MAP2K1;MET;FOXO1;RELA;KIT;SRC		CHEK1;IKBKB;STAT1;PIK3CA;BAD;TP53;SRC;KIT;DEPTOR;JUN;RET;AURKA;KDR;PTGS2;PDGFRB;FGFR1;CHEK2	BAX;EP300;CHEK1;PDGFRB;KDR;TP53;CHEK2;PRKAA1;DEPTOR;ESR1;AR;SRC;TSC2;PIK3CA;MAP2K1;CAV1;HDAC1;SQSTM1;FOXO1;AKT1S1;GATA3;MET;RPTOR;PTGS2;TNFSF11;KIT;AURKA;MTOR;BAD;ERBB3;TWIST1;JUN;MAP2K6;NFKBIA;BRAF;CTNNB1;KLF4;ITGB1;STAT1;RET;FGFR1;PDGFRA;ERBB2;IKBKB;NOTCH1	ERBB2;ATM;CTNNB1;ILK;FOXO1;PDGFRB;PRKAA1;BRAF;TSC2;ITGB1;MYC;FGFR1;AKT1S1;MET;EHMT2;KDM1A;MTOR;DEPTOR;CAV1;RPTOR;PIK3CA;NOTCH1;RELA;MAP2K1;SRC;MAP2K6;AURKA;RET;CHEK1;PTGS2;EGFR;STAT1;BAX;JUN;NFKBIA;BAD;KLF4;PTEN;TP53;CHEK2	PIK3CA;KDR;BAD;PTGS2;RELA;SQSTM1;KIT;IKBKB;STAT1;CHEK2;CHEK1;ATR;DEPTOR;JUN;PDGFRB;KDM1A;CHUK;RPTOR;FGFR1;TP53;MYC;HDAC3;AURKA;RET;EHMT2	ESR1;MAP2K1;BRAF;SQSTM1;CTNNB1;TSC2;NOTCH1;GATA3;MET;BAX;EP300;NFKBIA;PDGFRA;RPTOR;TWIST1;ERBB3;ITGB1;RET;FOXO1;TNFSF11;PRKAA1;BAD;CHEK2;KLF4;AKT1S1;HDAC1;MAP2K6;AR;CAV1;ERBB2;MTOR	MTOR;NOTCH1;ESR1;CHEK2;PDGFRA;FOXO1;ITGB1;MAP2K1;EGFR;RET;KLF4;BRAF;CTNNB1;TSC2;MAP2K6;MET;NFKBIA	ITGB1;EZH2;TSC2;KLF4;PRKAB1;YWHAZ	15		25	10	15	24
GO_REGULATION_OF_PROTEIN_MODIFICATION_PROCESS	10.502	18.212	10.149	17.845	25.657	21.156	22.422	8.524	32.83	16.58	34.862		14.688	37.569	31.695	19.212	22.948	14.009	3.637	STAT2;CCNC;RB1;DEPTOR;PIK3CA;TP53;JUN;ATG7;KDM1A;PDGFRB;RELA;MAPK8;FGFR1;SRC;DNMT3B;PTGS2;MYC;KAT2B		ERBB2;KIT;HDAC3;DNMT1;MTOR;ERBB3;TP53;IGF1R;PDGFRA;AKT1S1;CAV1;SOCS1;PRKAA1;GATA3;DEPTOR;CDKN1A;RPTOR;DNMT3B;STAT3;JUN;CHEK1;EGFR;ATM;SQSTM1;RELA	CHEK1;RELA;CAV1;SQSTM1;ERBB2;RPTOR;TP53	EGFR;PDGFRA;GATA3;ATM;CHEK1;RPTOR;STAT3;ERBB3;DEPTOR;ERBB2;DNMT1;KIT;CAV1;HDAC3	BAX;TSC2;ERBB2;CHEK2;PRKDC;BAK1;PDGFRA;PRKAA1;PTEN;MTOR;MAP2K6;CDKN1B;LRP6;BRAF;RET;ITGA5;FOXO1;HDAC4;NOTCH1;SHC1;AKT1S1;CTNNB1;CDKN1A;KLF4;MAP2K1;CHEK1	TSC2;DNMT3B;RB1;DEPTOR;MAP2K6;MAPK8;IKBKB;EGFR;DNMT1;HDAC4;FOXO1;PIK3CA;LRP6;KDR;RELA;CHEK2;YWHAZ;PIAS1;BAK1;KIT;ERBB2;ILK;EZH2;KLF4;CHEK1;STAT3;ATM;CDKN1B;MTOR;CASP3;RPTOR;ERBB3;CAV1;HDAC3		ITGA5;AKT1S1;CDKN1B;EGFR;TSC2;CAV1;PRKAA1;CHEK2;MAP2K6;RELA;MTOR;RET;PTEN;CHEK1;NOTCH1;ILK;FOXO1;PRKDC;ERBB2;RPTOR;KLF4;LRP6;BRAF;HDAC4;BAX;MAP2K1;ATM;CDKN1A;CTNNB1		CDKN1B;STAT3;RELA;KIT;LRP6;CASP3;ERBB3;CHEK2;TSC2;HDAC3;RB1;ERBB2;PIAS1;CAV1;MAPK8;DNMT1;ILK;KDR;ATM;CHEK1;MAP2K6;FOXO1;RPTOR;EGFR;MTOR;PIK3CA;DEPTOR;IKBKB;HDAC4	JUN;SOCS1;AKT1S1;MTOR;CDKN1A;RELA;PRKAA1;TP53;DNMT3B;EGFR;IGF1R;SQSTM1	HDAC4;RELA;PDGFRB;MAP2K1;CHEK1;KAT2B;LRP6;TP53;ATG7;PRKDC;FOXO1;ITGA5;KDM1A;CHEK2;EGFR;NOTCH1;RB1;KLF4;IKBKB;BRAF;KDR;MYC;JUN;KIT;KDM5A;STAT3;CASP3;CCNC;RPTOR;PIK3CA;RET;SQSTM1;MAPK8;DNMT1;DNMT3B;HDAC3;CTNNB1;PDGFRA;FGFR1;MAP2K6;TSC2;STAT2;MTOR;CDKN1B;CDKN1A;PTGS2;DEPTOR;PIAS1	CHEK1;ERBB2;RPTOR;TP53;CAV1;RELA;SQSTM1	KDM1A;TP53;CASP3;HDAC3;STAT3;SRC;CHEK2;KIT;FGFR1;DNMT3B;STAT2;RELA;MAPK8;ATG7;CCNC;JUN;ALK;PDGFRB;KDR;KAT2B;RB1;IKBKB;PTGS2;PIK3CA;MYC;DEPTOR	CHEK2;PDGFRB;CHEK1;HDAC4;BRAF;RET;AKT1S1;KDM1A;TP53;CDKN1B;HDAC3;PRKAA1;PDGFRA;PTEN;CTNNB1;CASP3;BAX;MTOR;STAT2;PRKDC;MAP2K6;ERBB2;MYC;FGFR1;ALK;ITGA5;TSC2;JUN;KDR;STAT3;LRP6;ATG7;IKBKB;DEPTOR;KAT2B;NOTCH1;PTGS2;SHC1;BAK1;PIK3CA;MAPK8;RB1;DNMT3B;KLF4;MAP2K1;FOXO1;CDKN1A;RELA;CCNC;KIT;SRC		CHEK1;IKBKB;DEPTOR;KAT2B;CHEK2;PTGS2;CCNC;CASP3;STAT2;KIT;FGFR1;PDGFRB;MAPK8;JUN;DNMT1;RET;ATG7;PIK3CA;TP53;SRC;RB1;DNMT3B;KDR	FGFR1;BAX;EP300;CHEK1;HDAC4;RB1;LRP6;CCNC;KDR;PDGFRB;TP53;CHEK2;PRKAA1;DEPTOR;DNMT1;CDKN1B;KAT2B;AR;SRC;TSC2;PIK3CA;MAP2K1;CAV1;SQSTM1;KDM5A;FOXO1;STAT2;AKT1S1;ITGA5;GATA3;RPTOR;DNMT3B;PTGS2;TNFSF11;KIT;CASP3;PRKDC;MTOR;ERBB3;ATG7;TWIST1;JUN;MAP2K6;CDKN1A;BRAF;CTNNB1;MAPK8;RET;KLF4;PDGFRA;ERBB2;IKBKB;NOTCH1	ERBB2;DNMT3B;ATM;CTNNB1;ILK;FOXO1;PDGFRB;PRKAA1;HDAC4;BRAF;TSC2;ATG7;MYC;FGFR1;PRKDC;CDKN1A;ITGA5;KDM1A;PTEN;MTOR;DEPTOR;CAV1;KAT2B;STAT2;RPTOR;PIK3CA;NOTCH1;LRP6;MAPK8;RELA;MAP2K1;SRC;CCNC;MAP2K6;RET;CDKN1B;CHEK1;PTGS2;EGFR;BAX;CHEK2;JUN;KLF4;AKT1S1;TP53;RB1	ATG7;PIAS1;PIK3CA;DNMT3B;KDR;RB1;PTGS2;RELA;DNMT1;SQSTM1;KIT;IKBKB;MAPK8;CHEK2;CHEK1;STAT3;DEPTOR;JUN;PDGFRB;KDM1A;CCNC;RPTOR;FGFR1;KAT2B;TP53;MYC;HDAC3;CASP3;RET;STAT2	MAP2K1;BRAF;SQSTM1;ITGA5;CTNNB1;KDM5A;TSC2;CDKN1A;NOTCH1;GATA3;BAX;HDAC4;EP300;PDGFRA;PRKDC;RPTOR;LRP6;TWIST1;ERBB3;RET;FOXO1;TNFSF11;PRKAA1;CHEK2;KLF4;AKT1S1;MAP2K6;AR;CAV1;ERBB2;CDKN1B;MTOR	MTOR;NOTCH1;PDGFRA;HDAC4;RET;CTNNB1;EGFR;CDKN1A;MAP2K6;MAP2K1;TSC2;KDM5A;KLF4;CHEK2;FOXO1;PRKDC;BRAF;CDKN1B;LRP6;ITGA5	EZH2;TSC2;KLF4;DNMT3B;BAK1;YWHAZ	18		25	7	14	26
GO_PEPTIDYL_AMINO_ACID_MODIFICATION	9.735	17.87	13.031	20.38	25.212	21.377	22.422	5.436	33.608	17.918	37.283		14.44	32.513	30.852	22.312	19.889	13.038	2.64	EHMT2;PIK3CA;BRCA2;TP53;KDM1A;PDGFRB;RELA;AURKA;ULK1;MAPK8;FGFR1;SRC;DNMT3B;PTGS2;KAT2B		RPS6KB1;ERBB2;KIT;DNMT1;MTOR;ERBB3;TP53;IGF1R;PDGFRA;CAV1;NCOA1;MET;SOCS1;PRKAA1;GATA3;RPTOR;DNMT3B;STAT3;CHEK1;EGFR;ATM;RELA	CHEK1;RELA;ATR;FBXO11;CAV1;ERBB2;RPTOR;CHUK;TP53	EGFR;PDGFRA;GATA3;ATM;CHEK1;MET;RPS6KB1;NCOA1;RPTOR;STAT3;ERBB3;ERBB2;DNMT1;KIT;CAV1	BAX;MET;ATR;ERBB2;CHEK2;PRKDC;ASH2L;BAK1;NCOA1;PDGFRA;PRKAA1;PTEN;MTOR;MAP2K6;CREBBP;BRAF;RET;ITGA5;HDAC4;SHC1;JAK1;RPS6KB1;CTNNB1;MAP2K1;CHEK1	DNMT3B;NCOA1;MAPK8;IKBKB;EGFR;DNMT1;HDAC4;MET;PIK3CA;CREBBP;KDR;RELA;CHEK2;FBXO11;RPS6KB1;PIAS1;BAK1;KIT;ERBB2;ILK;EZH2;CHEK1;STAT3;NCOA3;ATM;MTOR;RPTOR;ERBB3;CAV1;MAP2K6		ITGA5;EGFR;CREBBP;NCOA1;CAV1;PRKAA1;CHEK2;MAP2K6;RELA;MTOR;RET;PTEN;CHEK1;JAK1;ILK;PRKDC;ERBB2;RPTOR;MET;BRAF;HDAC4;BAX;MAP2K1;ATM;RPS6KB1;CTNNB1		STAT3;RELA;KIT;CREBBP;RPS6KB1;ERBB3;CHEK2;ERBB2;PIAS1;CAV1;MET;MAPK8;DNMT1;NCOA3;ILK;KDR;ATM;CHEK1;MAP2K6;RPTOR;EGFR;MTOR;PIK3CA;IKBKB;HDAC4;NCOA1	SOCS1;MTOR;RELA;PRKAA1;TP53;DNMT3B;EGFR;IGF1R	HDAC4;RELA;PDGFRB;MAP2K1;CHEK1;KAT2B;TP53;EHMT2;PRKDC;ITGA5;ULK1;CHUK;KDM1A;CHEK2;CREBBP;AURKA;EGFR;IKBKB;BRAF;KDR;KIT;BRCA2;STAT3;RPTOR;PIK3CA;RET;MAPK8;DNMT1;RPS6KB1;DNMT3B;NCOA3;CTNNB1;PDGFRA;FGFR1;NCOA1;SETD1A;MET;MAP2K6;MTOR;ATR;ASH2L;PTGS2;PIAS1	CHEK1;ERBB2;RPTOR;TP53;CAV1;CHUK;RELA;ATR	KDM1A;TP53;ULK1;STAT3;SRC;CHEK2;KIT;NCOA3;FGFR1;DNMT3B;EHMT2;BRCA2;RPS6KB1;RELA;MAPK8;AURKA;ALK;PDGFRB;KDR;KAT2B;IKBKB;PTGS2;CHUK;PIK3CA	AURKA;ATR;CHEK2;BRCA2;PDGFRB;NCOA3;CHEK1;HDAC4;BRAF;RET;KDM1A;JAK1;TP53;CHUK;PRKAA1;PDGFRA;PTEN;CTNNB1;BAX;NCOA1;MTOR;EHMT2;PRKDC;MAP2K6;ERBB2;CREBBP;FGFR1;ALK;ITGA5;RPS6KB1;KDR;STAT3;ASH2L;IKBKB;KAT2B;PTGS2;SHC1;BAK1;PIK3CA;MAPK8;DNMT3B;MAP2K1;MET;ULK1;RELA;KIT;SRC		CHEK1;IKBKB;ULK1;KAT2B;CHEK2;PTGS2;KIT;RPS6KB1;AURKA;MAPK8;PDGFRB;FGFR1;DNMT1;BRCA2;RET;PIK3CA;TP53;SRC;DNMT3B;KDR	RPS6KB1;BAX;EP300;HDAC4;CHEK1;PDGFRB;KDR;TP53;CHEK2;PRKAA1;DNMT1;CREBBP;KAT2B;SRC;PIK3CA;MAP2K1;CAV1;ASH2L;ITGA5;GATA3;MET;RPTOR;DNMT3B;PTGS2;KIT;JAK1;PRKDC;AURKA;BRCA2;MTOR;ERBB3;TWIST1;MAP2K6;NCOA1;BRAF;CTNNB1;MAPK8;RET;FGFR1;PDGFRA;ERBB2;IKBKB;ULK1	ERBB2;DNMT3B;ATM;CTNNB1;ILK;NCOA1;PDGFRB;PRKAA1;HDAC4;BRAF;JAK1;FGFR1;PRKDC;MET;EHMT2;ITGA5;KDM1A;MTOR;CAV1;KAT2B;CREBBP;RPTOR;PIK3CA;MAPK8;RELA;MAP2K1;SRC;MAP2K6;BRCA2;AURKA;RET;CHEK1;PTGS2;EGFR;ULK1;BAX;RPS6KB1;PTEN;TP53;CHEK2	PIK3CA;PIAS1;DNMT3B;KDR;PTGS2;RELA;DNMT1;KIT;IKBKB;MAPK8;CHEK2;CHEK1;ATR;STAT3;NCOA3;PDGFRB;ULK1;KDM1A;CHUK;BRCA2;RPTOR;FGFR1;KAT2B;TP53;RPS6KB1;SETD1A;AURKA;RET;EHMT2	MAP2K1;BRAF;NCOA1;ITGA5;CTNNB1;JAK1;GATA3;MET;BAX;HDAC4;ASH2L;EP300;PDGFRA;PRKDC;RPTOR;TWIST1;ERBB3;RET;PRKAA1;CHEK2;MAP2K6;RPS6KB1;CAV1;CREBBP;ERBB2;MTOR	MTOR;ASH2L;PDGFRA;CHEK2;NCOA1;HDAC4;MAP2K1;CREBBP;EGFR;RET;PRKDC;BRAF;CTNNB1;MAP2K6;RPS6KB1;ITGA5;MET	EZH2;DNMT3B;BAK1;FBXO11	15		22	9	15	25
GO_POSITIVE_REGULATION_OF_CELLULAR_BIOSYNTHETIC_PROCESS	15.683	17.842	8.836	17.435	20.197	19.414	20.858	9.542	41.783	20.829	37.38		16.592	40.355	35.654	24.372	26.204	20.225	2.125	STAT2;SMARCC1;BRCA2;PHF2;FGFR1;SRC;KAT2B;CCNC;RB1;TP53;STAT1;STAT5A;RELA;SMARCA4;ANXA1;FOS;FOXK2;JUN;KDM1A;PDGFRB;MED1;PTGS2;MYC		RPS6KB1;ERBB2;HDAC3;FOS;MTOR;ANXA1;TP53;STAT6;NCOA1;MET;PRKAA1;GATA3;SMAD2;RPTOR;STAT3;JUN;CHEK1;PHF8;EGFR;VIM;ATM;SQSTM1;STAT4;STAT5A;RELA	CHEK1;RELA;ATR;FOS;SQSTM1;ERBB2;RPTOR;CHUK;TP53	EGFR;GATA3;SMAD2;ATM;CHEK1;MET;RPS6KB1;PHF8;NCOA1;RPTOR;STAT3;ERBB2;HDAC3	MET;ATR;ERBB2;CHEK2;PRKDC;ASH2L;NCOA1;SMAD2;PRKAA1;MTOR;LRP6;ESR1;CREBBP;VIM;RET;FOXO1;HDAC4;NOTCH1;NFKBIA;STAT6;SHC1;RPS6KB1;CTNNB1;KLF4;MAP2K1;CHEK1	SMAD2;NCOA1;VIM;CTBP2;NFKBIA;IKBKB;EGFR;HDAC4;MET;FOXO1;PHF8;MED1;LRP6;CREBBP;RELA;CHEK2;RPS6KB1;PIAS1;ERBB2;STAT6;ILK;KLF4;CHEK1;STAT3;NCOA3;ATM;MTOR;RPTOR;RB1;HDAC3		STAT6;EGFR;CREBBP;PGR;NCOA1;PRKAA1;NFKBIA;CHEK2;RELA;MTOR;RET;CHEK1;NOTCH1;ILK;FOXO1;PRKDC;ERBB2;RPTOR;KLF4;MET;LRP6;SMAD2;HDAC4;VIM;MAP2K1;ATM;RPS6KB1;CTNNB1		CTBP2;STAT3;RELA;MED1;CREBBP;LRP6;RPS6KB1;CHEK2;HDAC3;RB1;PHF8;ERBB2;STAT6;PIAS1;MET;NCOA3;ILK;ATM;CHEK1;FOXO1;RPTOR;EGFR;MTOR;IKBKB;HDAC4;NCOA1;NFKBIA;SMAD2	JUN;ANXA1;VIM;STAT5A;MTOR;STAT4;RELA;PRKAA1;TP53;STAT6;EGFR;FOS;SQSTM1	HDAC4;VIM;SMARCC1;RELA;PDGFRB;MAP2K1;CHEK1;KAT2B;MED23;STAT5A;LRP6;TP53;PRKDC;FOXO1;CHUK;NFKBIA;KDM1A;CHEK2;YAP1;CREBBP;STAT1;EGFR;NOTCH1;SMARCA4;STAT6;ZEB1;RB1;KLF4;IKBKB;MYC;JUN;KDM5A;BRCA2;STAT3;CCNC;RPTOR;RET;ESR1;SQSTM1;RPS6KB1;NCOA3;HDAC3;CTNNB1;FGFR1;NCOA1;PHF2;MET;STAT2;MTOR;FOS;ATR;ASH2L;FOXK2;ANXA1;PTGS2;PIAS1	FOS;CHEK1;ERBB2;RPTOR;TP53;CHUK;RELA;ATR;SQSTM1	STAT5A;KDM1A;TP53;PHF2;HDAC3;STAT3;SRC;CHEK2;SMARCE1;NCOA3;FGFR1;STAT1;STAT4;BRCA2;RPS6KB1;STAT2;RELA;CCNC;JUN;SMARCC1;PDGFRB;FOS;ANXA1;FOXK2;KAT2B;RB1;IKBKB;PTGS2;CHUK;MYC	ATR;CHEK2;BRCA2;PDGFRB;NCOA3;CHEK1;HDAC4;NFKBIA;STAT5A;RET;KDM1A;TP53;CHUK;STAT1;PRKAA1;HDAC3;CTNNB1;VIM;NCOA1;MTOR;STAT2;PRKDC;FOXK2;ERBB2;MYC;CREBBP;FGFR1;RPS6KB1;JUN;SMARCE1;STAT3;FOS;STAT4;LRP6;ASH2L;STAT6;IKBKB;KAT2B;NOTCH1;PTGS2;SHC1;SMAD2;ESR1;PHF2;RB1;KLF4;MAP2K1;MET;FOXO1;ANXA1;RELA;CCNC;SMARCC1;SRC		CHEK1;IKBKB;STAT1;KAT2B;CHEK2;PTGS2;CCNC;STAT5A;STAT2;STAT6;FOXK2;RPS6KB1;FOS;FGFR1;PDGFRB;JUN;ANXA1;STAT4;BRCA2;RET;SMARCC1;TP53;SRC;RB1;PHF2	RPS6KB1;EP300;CHEK1;HDAC4;RB1;LRP6;STAT6;CCNC;PDGFRB;TP53;CHEK2;ZEB1;PRKAA1;FOXK2;ESR1;CREBBP;KAT2B;AR;SRC;SQSTM1;MAP2K1;ASH2L;HDAC1;FOXO1;KDM5A;STAT2;MED1;GATA3;MET;RPTOR;STAT4;PTGS2;TNFSF11;PRKDC;BRCA2;STAT5A;PHF2;SMARCC2;MTOR;SMARCC1;TWIST1;JUN;VIM;NFKBIA;NCOA1;ANXA1;FOS;CTNNB1;SMAD2;KLF4;STAT1;RET;FGFR1;ERBB2;IKBKB;NOTCH1	ERBB2;ATM;CTNNB1;PHF2;ILK;FOXO1;NCOA1;SMARCA4;PDGFRB;PRKAA1;HDAC4;MYC;FGFR1;PRKDC;ANXA1;MET;KDM1A;MTOR;FOS;MED1;KAT2B;CREBBP;STAT2;SMARCC1;RPTOR;PGR;NOTCH1;LRP6;STAT6;RELA;MAP2K1;SRC;KLF4;CCNC;BRCA2;RET;VIM;CHEK1;PTGS2;EGFR;FOXK2;SMAD2;STAT1;CHEK2;JUN;NFKBIA;STAT5A;RPS6KB1;TP53;RB1	PIAS1;RB1;PTGS2;RELA;ANXA1;SQSTM1;FOXK2;IKBKB;STAT1;CHEK2;CHEK1;ATR;STAT3;JUN;STAT6;NCOA3;FOS;PDGFRB;PHF2;KDM1A;SMARCC1;CHUK;CCNC;STAT5A;BRCA2;MED23;RPTOR;FGFR1;KAT2B;TP53;MYC;RPS6KB1;HDAC3;RET;STAT2	ESR1;MAP2K1;SMARCC2;SMAD2;NCOA1;SQSTM1;CTNNB1;KDM5A;NOTCH1;GATA3;MET;HDAC4;MED1;ASH2L;EP300;NFKBIA;PRKDC;RPTOR;LRP6;TWIST1;RET;FOXO1;TNFSF11;PRKAA1;CHEK2;VIM;KLF4;ZEB1;HDAC1;AR;RPS6KB1;CREBBP;ERBB2;STAT6;MTOR	MTOR;NOTCH1;ESR1;HDAC4;CREBBP;RET;CTNNB1;EGFR;NFKBIA;ASH2L;MAP2K1;VIM;RPS6KB1;MET;KDM5A;KLF4;ZEB1;CHEK2;NCOA1;FOXO1;STAT6;SMARCA4;PRKDC;LRP6;YAP1	MED1;KLF4;SMAD2;VIM	23		25	9	13	26
GO_RESPONSE_TO_HORMONE	15.278	17.842	5.956	15.327	16.6	16.495	17.201	13.037	30.928	19.626	35.106		16.793	35.425	30.6	16.879	20.387	15.061	2.16	STAT2;SMARCC1;PIK3CA;EIF4EBP1;SMARCA4;ANXA1;FOS;SRC;PDGFRB;STAT1;RELA;BAD;LDHA;MED1;STAT5A;DNMT3B;PTGS2;KAT2B		BAD;RPS6KB1;KIT;FOS;MTOR;ANXA1;STAT6;IGF1R;CAV1;NCOA1;SOCS1;PRKAA1;GATA3;CDKN1A;DNMT3B;STAT3;EGFR;STAT4;STAT5A;RELA	RELA;CAV1;FOS;BAD;CHUK	EGFR;GATA3;BAD;RPS6KB1;NCOA1;STAT3;KIT;CAV1	IDH1;TSC2;PRKDC;ASH2L;NCOA1;CLDN1;PRKAA1;PTEN;MTOR;CDKN1B;LRP6;ESR1;FOXO1;HDAC4;NOTCH1;STAT6;SHC1;RPS6KB1;CDKN1A	TSC2;EIF4EBP1;DNMT3B;NCOA1;EGFR;HDAC4;FOXO1;MED1;PIK3CA;LRP6;RELA;RPS6KB1;KIT;STAT6;STAT3;NCOA3;CDKN1B;MTOR;CASP3;CAV1;BAD		STAT6;CDKN1B;EGFR;PGR;NCOA1;CAV1;PRKAA1;RELA;MTOR;PTEN;NOTCH1;FOXO1;BAD;PRKDC;LRP6;HDAC4;RPS6KB1;CDKN1A;IDH1;TSC2		CDKN1B;STAT3;RELA;KIT;BAD;MED1;LRP6;RPS6KB1;CASP3;TSC2;STAT6;CAV1;NCOA3;FOXO1;EGFR;MTOR;PIK3CA;EIF4EBP1;HDAC4;NCOA1	SOCS1;ANXA1;STAT5A;MTOR;STAT4;CDKN1A;RELA;PRKAA1;DNMT3B;STAT6;FOS;EGFR;IGF1R	HDAC4;SMARCC1;RELA;PDGFRB;KAT2B;STAT5A;LRP6;PRKDC;FOXO1;CHUK;YAP1;STAT1;EGFR;SMARCA4;NOTCH1;STAT6;LDHA;KIT;STAT3;CASP3;PIK3CA;ESR1;RPS6KB1;DNMT3B;NCOA3;NCOA1;BAD;CBX3;TSC2;STAT2;MTOR;FOS;CDKN1B;ASH2L;CDKN1A;ANXA1;PTGS2	FOS;CAV1;CHUK;RELA	STAT5A;CASP3;STAT3;SRC;KIT;NCOA3;STAT1;DNMT3B;STAT4;RPS6KB1;STAT2;LDHA;RELA;BAD;EIF4EBP1;SMARCC1;PDGFRB;FOS;ANXA1;KAT2B;PTGS2;CHUK;PIK3CA	CLDN1;PDGFRB;NCOA3;HDAC4;STAT5A;CHUK;CDKN1B;STAT1;PRKAA1;LDHA;PTEN;CASP3;NCOA1;MTOR;STAT2;PRKDC;TSC2;EIF4EBP1;RPS6KB1;STAT3;FOS;STAT4;LRP6;ASH2L;STAT6;IDH1;KAT2B;PTGS2;SHC1;NOTCH1;PIK3CA;ESR1;BAD;DNMT3B;FOXO1;CDKN1A;ANXA1;RELA;SMARCC1;KIT;SRC		STAT1;KAT2B;PTGS2;CASP3;STAT5A;LDHA;STAT2;STAT6;KIT;RPS6KB1;FOS;PDGFRB;ANXA1;EIF4EBP1;STAT4;PIK3CA;BAD;SMARCC1;SRC;DNMT3B	RPS6KB1;EP300;LRP6;HDAC4;STAT6;PDGFRB;PRKAA1;ESR1;CDKN1B;KAT2B;AR;SRC;TSC2;PIK3CA;ASH2L;CAV1;HDAC1;FOXO1;CLDN1;STAT2;MED1;GATA3;STAT4;DNMT3B;PTGS2;KIT;CASP3;PRKDC;STAT5A;EIF4EBP1;MTOR;BAD;SMARCC1;CDKN1A;NCOA1;ANXA1;FOS;IDH1;STAT1;LDHA;NOTCH1	DNMT3B;NCOA1;FOXO1;SMARCA4;PDGFRB;PRKAA1;HDAC4;EIF4EBP1;TSC2;PRKDC;CDKN1A;ANXA1;RPS6KB1;MTOR;CAV1;FOS;MED1;KAT2B;STAT2;SMARCC1;PIK3CA;PGR;NOTCH1;LRP6;IDH1;STAT6;RELA;SRC;CDKN1B;PTGS2;EGFR;STAT1;BAD;STAT5A;LDHA;PTEN	PIK3CA;DNMT3B;BAD;PTGS2;RELA;ANXA1;KIT;LDHA;STAT1;STAT3;STAT6;NCOA3;FOS;PDGFRB;SMARCC1;CHUK;STAT5A;CBX3;KAT2B;RPS6KB1;CASP3;STAT2	ESR1;NCOA1;TSC2;CDKN1A;NOTCH1;GATA3;HDAC4;MED1;ASH2L;EP300;PRKDC;LRP6;FOXO1;PRKAA1;CLDN1;BAD;IDH1;HDAC1;AR;RPS6KB1;CAV1;STAT6;CDKN1B;MTOR	MTOR;ASH2L;NOTCH1;ESR1;NCOA1;FOXO1;HDAC4;STAT6;SMARCA4;EGFR;PRKDC;CDKN1B;LRP6;RPS6KB1;TSC2;CDKN1A;YAP1	MED1;DNMT3B;TSC2	18		20	5	8	19
GO_POSITIVE_REGULATION_OF_MULTICELLULAR_ORGANISMAL_PROCESS	9.779	17.43	6.968	11.638	16.527	16.818	13.109	11.14	23.16	13.794	26.331		8.92	27.748	25.368	13.298	21.025	10.855	4.467	RB1;FGFR1;ANXA1;FOS;JUN;KDM1A;PDGFRB;STAT1;BAD;SRC;AURKA;RELA;MED1;STAT5A;DNMT3B;PTGS2;MYC		BAD;KIT;HDAC3;FOS;MTOR;ANXA1;ERBB3;ITGB1;STAT6;IGF1R;CAV1;NCOA1;MET;SOCS1;PRKAA1;GATA3;SMAD2;PRKAB1;DNMT3B;STAT3;JUN;EGFR;STAT5A;RELA	RELA;CAV1;FOS;BAD;CHUK	EGFR;GATA3;SMAD2;MET;BAD;NCOA1;STAT3;ERBB3;KIT;CAV1;HDAC3	BAX;MET;PRKDC;ITGB1;SIRT6;NCOA1;SMAD2;PRKAA1;PTEN;MTOR;CREBBP;RET;ITGA5;HDAC4;NOTCH1;STAT6;JAK1;CTNNB1;KLF4;MAP2K1	SMAD2;DNMT3B;NCOA1;RB1;EGFR;HDAC4;MET;SIRT6;MED1;CREBBP;KDR;ITGB1;RELA;KIT;STAT6;ILK;EZH2;PRKAB1;KLF4;STAT3;NCOA3;MTOR;ERBB3;CAV1;HDAC3;BAD		ITGA5;SIRT6;STAT6;EGFR;CREBBP;NCOA1;ITGB1;CAV1;PRKAA1;RELA;MTOR;RET;PTEN;NOTCH1;JAK1;ILK;BAD;PRKDC;KLF4;MET;SMAD2;HDAC4;BAX;MAP2K1;CTNNB1		STAT3;RELA;KIT;BAD;MED1;CREBBP;ERBB3;HDAC3;RB1;STAT6;CAV1;MET;NCOA3;ILK;KDR;EGFR;MTOR;HDAC4;NCOA1;SIRT6;SMAD2	JUN;SOCS1;ANXA1;STAT5A;MTOR;PRKAB1;RELA;PRKAA1;DNMT3B;STAT6;FOS;EGFR;IGF1R;ITGB1	HDAC4;RELA;PDGFRB;MAP2K1;STAT5A;PRKDC;ITGA5;CHUK;KDM1A;YAP1;CREBBP;AURKA;EGFR;NOTCH1;STAT1;STAT6;ZEB1;RB1;KLF4;KDR;MYC;JUN;KIT;STAT3;RET;ITGB1;DNMT3B;NCOA3;HDAC3;CTNNB1;FGFR1;NCOA1;BAD;MET;HK2;MTOR;FOS;ANXA1;PTGS2	FOS;CAV1;CHUK;RELA	STAT5A;KDM1A;HDAC3;STAT3;SRC;KIT;NCOA3;FGFR1;STAT1;DNMT3B;RELA;BAD;AURKA;JUN;ALK;PDGFRB;KDR;FOS;ANXA1;RB1;PTGS2;CHUK;MYC	AURKA;PDGFRB;NCOA3;HDAC4;STAT5A;RET;ITGB1;JAK1;CHUK;STAT1;KDM1A;PRKAA1;HDAC3;PTEN;CTNNB1;BAX;NCOA1;MTOR;SIRT6;PRKDC;MYC;CREBBP;FGFR1;ALK;ITGA5;JUN;KDR;STAT3;FOS;STAT6;NOTCH1;PTGS2;SMAD2;BAD;RB1;DNMT3B;KLF4;MAP2K1;MET;ANXA1;RELA;KIT;SRC		STAT1;ANXA1;BAD;STAT6;SRC;KIT;RB1;STAT5A;FOS;DNMT3B;RET;AURKA;KDR;PTGS2;PDGFRB;FGFR1;JUN	FGFR1;BAX;EP300;HDAC4;RB1;STAT6;PDGFRB;KDR;ZEB1;PRKAA1;CREBBP;AR;SRC;MAP2K1;CAV1;HDAC1;ITGA5;MED1;GATA3;MET;DNMT3B;PTGS2;TNFSF11;KIT;JAK1;PRKDC;AURKA;STAT5A;MTOR;BAD;ERBB3;TWIST1;JUN;NCOA1;ANXA1;FOS;CTNNB1;SMAD2;KLF4;ITGB1;STAT1;RET;SIRT6;NOTCH1	DNMT3B;NCOA1;CTNNB1;ILK;PDGFRB;PRKAA1;HDAC4;SIRT6;JAK1;ITGB1;MYC;FGFR1;PRKDC;ANXA1;MET;ITGA5;KDM1A;MTOR;CAV1;FOS;MED1;CREBBP;NOTCH1;STAT6;RELA;MAP2K1;SRC;AURKA;RET;PTGS2;EGFR;SMAD2;STAT1;BAX;JUN;BAD;STAT5A;KLF4;PTEN;RB1	DNMT3B;KDR;BAD;RB1;PTGS2;RELA;ANXA1;KIT;HK2;STAT1;STAT3;JUN;STAT6;NCOA3;FOS;PDGFRB;KDM1A;CHUK;STAT5A;FGFR1;MYC;HDAC3;AURKA;RET	MAP2K1;SMAD2;NCOA1;ITGA5;CTNNB1;JAK1;NOTCH1;GATA3;MET;BAX;HDAC4;MED1;EP300;PRKDC;TWIST1;ERBB3;ITGB1;RET;TNFSF11;PRKAA1;SIRT6;BAD;KLF4;ZEB1;HDAC1;AR;CAV1;CREBBP;STAT6;MTOR	MTOR;NOTCH1;NCOA1;HDAC4;STAT6;MAP2K1;CREBBP;ITGB1;RET;PRKDC;KLF4;EGFR;CTNNB1;MET;ITGA5;YAP1;ZEB1	ITGB1;SMAD2;MED1;EZH2;DNMT3B;KLF4;PRKAB1	17		24	5	11	20
GO_POSITIVE_REGULATION_OF_SIGNALING	5.924	17.011	11.321	12.329	18.38	14.195	16.195	6.255	18.513	8.606	21.478		6.13	21.623	18.432	9.248	17.144	9.529	3.637	PIK3CA;SMARCA4;TP53;FGFR1;JUN;PDGFRB;BAD;MAPK8;MED1;SRC;RELA;PTGS2;KAT2B		BAD;ERBB2;KIT;HDAC3;MTOR;ERBB3;TP53;ITGB1;IGF1R;PDGFRA;CAV1;MET;SOCS1;PRKAA1;GATA3;SMAD2;RPTOR;STAT3;JUN;BCL2L1;EGFR;ATM;SQSTM1;RELA	RELA;ATR;CAV1;SQSTM1;BAD;ERBB2;RPTOR;CHUK;TP53	EGFR;PDGFRA;GATA3;SMAD2;ATM;MET;BAD;RPTOR;STAT3;ERBB3;BCL2L1;ERBB2;KIT;CAV1;HDAC3	BAX;MET;ATR;ERBB2;BAK1;ITGB1;PDGFRA;SMAD2;PRKAA1;PTEN;MTOR;MAP2K6;ESR1;CREBBP;BRAF;RET;ITGA5;NOTCH1;SHC1;CTNNB1;MAP2K1	SMAD2;BECN1;MAP2K6;CTBP2;MAPK8;IKBKB;EGFR;MET;MED1;PIK3CA;CREBBP;KDR;ITGB1;RELA;YWHAZ;BAK1;KIT;ERBB2;ILK;EZH2;STAT3;ATM;MTOR;RPTOR;ERBB3;CAV1;HDAC3;BAD		ITGA5;EGFR;CREBBP;ITGB1;CAV1;PRKAA1;MAP2K6;RELA;MTOR;RET;PTEN;NOTCH1;ILK;BAD;ERBB2;RPTOR;MET;SMAD2;BRAF;BAX;MAP2K1;ATM;CTNNB1		CTBP2;STAT3;RELA;KIT;BAD;MED1;CREBBP;ERBB3;HDAC3;ERBB2;CAV1;MET;MAPK8;ILK;KDR;BECN1;ATM;MAP2K6;RPTOR;EGFR;MTOR;PIK3CA;IKBKB;SMAD2	JUN;SOCS1;MTOR;RELA;PRKAA1;TP53;EGFR;IGF1R;SQSTM1;ITGB1	RELA;PDGFRB;MAP2K1;KAT2B;TP53;ITGA5;CHUK;YAP1;CREBBP;EGFR;SMARCA4;NOTCH1;IKBKB;BRAF;KDR;JUN;KIT;STAT3;RPTOR;PIK3CA;RET;ESR1;SQSTM1;MAPK8;ITGB1;HDAC3;CTNNB1;PDGFRA;FGFR1;MAP2K6;BAD;MET;MTOR;ATR;PTGS2	ERBB2;RPTOR;TP53;CAV1;CHUK;RELA;ATR;SQSTM1	PTGS2;PDGFRB;TP53;KDR;CHUK;PIK3CA;HDAC3;RELA;MAPK8;BAD;KAT2B;STAT3;SRC;JUN;ALK;KIT;FGFR1;IKBKB	ATR;PDGFRB;BRAF;ITGB1;RET;TP53;CHUK;HDAC3;PRKAA1;PDGFRA;PTEN;CTNNB1;BAX;MTOR;MAP2K6;ERBB2;CREBBP;FGFR1;ALK;ITGA5;JUN;KDR;STAT3;IKBKB;KAT2B;NOTCH1;PTGS2;SHC1;BAK1;PIK3CA;SMAD2;MAPK8;ESR1;BAD;MAP2K1;MET;RELA;KIT;SRC		IKBKB;PIK3CA;BAD;TP53;SRC;KIT;MAPK8;RET;KAT2B;KDR;PTGS2;PDGFRB;FGFR1;JUN	BAX;EP300;PDGFRB;KDR;TP53;PRKAA1;ESR1;CREBBP;KAT2B;AR;SRC;SQSTM1;PIK3CA;MAP2K1;CAV1;ITGA5;MED1;GATA3;MET;RPTOR;PTGS2;TNFSF11;KIT;MTOR;BAD;ERBB3;JUN;MAP2K6;BRAF;CTNNB1;MAPK8;SMAD2;ITGB1;RET;FGFR1;PDGFRA;ERBB2;IKBKB;NOTCH1	ERBB2;ATM;CTNNB1;ILK;SMARCA4;PDGFRB;PRKAA1;BRAF;ITGB1;FGFR1;MET;ITGA5;MTOR;CAV1;MED1;KAT2B;CREBBP;RPTOR;PIK3CA;NOTCH1;MAPK8;RELA;MAP2K1;SRC;MAP2K6;RET;PTGS2;EGFR;SMAD2;BAX;JUN;BAD;PTEN;TP53	PIK3CA;KDR;BAD;PTGS2;RELA;SQSTM1;KIT;IKBKB;MAPK8;ATR;STAT3;JUN;PDGFRB;CHUK;RPTOR;FGFR1;KAT2B;TP53;HDAC3;RET	ESR1;MAP2K1;BRAF;SMAD2;SQSTM1;ITGA5;CTNNB1;NOTCH1;GATA3;MET;BAX;MED1;EP300;PDGFRA;RPTOR;ERBB3;ITGB1;RET;TNFSF11;PRKAA1;BAD;MAP2K6;AR;CAV1;CREBBP;ERBB2;MTOR	MTOR;NOTCH1;ESR1;PDGFRA;SMARCA4;ITGB1;MAP2K1;CREBBP;EGFR;RET;BRAF;CTNNB1;MAP2K6;MET;ITGA5;YAP1	ITGB1;SMAD2;MED1;EZH2;BAK1;YWHAZ	13		24	9	15	21
GO_POSITIVE_REGULATION_OF_INTRACELLULAR_SIGNAL_TRANSDUCTION	4.012	16.865	11.512	12.131	14.404	15.541	13.641	5.994	16.134	8.272	20.862		6.111	20.974	16.845	8.425	16.818	8.282		PIK3CA;TP53;JUN;PDGFRB;BAD;FGFR1;SRC;RELA		BAD;ERBB2;KIT;HDAC3;MTOR;ERBB3;TP53;ITGB1;IGF1R;PDGFRA;CAV1;MET;PRKAA1;GATA3;RPTOR;JUN;BCL2L1;EGFR;ATM;RELA	RELA;ATR;CAV1;BAD;ERBB2;RPTOR;CHUK;TP53	EGFR;PDGFRA;GATA3;ATM;MET;BAD;RPTOR;ERBB3;BCL2L1;ERBB2;KIT;CAV1;HDAC3	ESR1;BAX;MET;SHC1;PDGFRA;BRAF;PRKAA1;ATR;ERBB2;RET;PTEN;MTOR;MAP2K6;CTNNB1;ITGB1;NOTCH1;MAP2K1	BECN1;MAP2K6;IKBKB;EGFR;MET;PIK3CA;KDR;ITGB1;RELA;KIT;ERBB2;ILK;EZH2;ATM;MTOR;RPTOR;ERBB3;CAV1;HDAC3;BAD		EGFR;ITGB1;PRKAA1;CAV1;MAP2K6;RELA;MTOR;RET;PTEN;NOTCH1;ILK;BAD;ERBB2;RPTOR;MET;BRAF;BAX;MAP2K1;ATM;CTNNB1		ERBB3;ERBB2;MAP2K6;RPTOR;KIT;CAV1;MET;EGFR;MTOR;PIK3CA;ILK;HDAC3;IKBKB;KDR;RELA;BECN1;BAD;ATM	JUN;MTOR;RELA;PRKAA1;TP53;EGFR;IGF1R;ITGB1	RELA;PDGFRB;MAP2K1;TP53;CHUK;EGFR;NOTCH1;IKBKB;BRAF;KDR;JUN;KIT;RPTOR;PIK3CA;RET;ESR1;ITGB1;HDAC3;CTNNB1;PDGFRA;FGFR1;MAP2K6;BAD;MET;MTOR;ATR	ERBB2;RPTOR;TP53;CAV1;CHUK;RELA;ATR	PDGFRB;TP53;KDR;CHUK;PIK3CA;HDAC3;RELA;BAD;SRC;JUN;ALK;KIT;FGFR1;IKBKB	ATR;PDGFRB;BRAF;ITGB1;RET;TP53;CHUK;HDAC3;PRKAA1;PDGFRA;PTEN;CTNNB1;BAX;MTOR;MAP2K6;ERBB2;FGFR1;ALK;JUN;KDR;IKBKB;NOTCH1;SHC1;PIK3CA;ESR1;BAD;MAP2K1;MET;RELA;KIT;SRC		IKBKB;PIK3CA;BAD;TP53;SRC;KIT;RET;KDR;PDGFRB;FGFR1;JUN	BAX;EP300;PDGFRB;KDR;TP53;PRKAA1;ESR1;AR;SRC;PIK3CA;MAP2K1;CAV1;GATA3;MET;RPTOR;TNFSF11;KIT;MTOR;BAD;ERBB3;JUN;MAP2K6;BRAF;CTNNB1;ITGB1;RET;FGFR1;PDGFRA;ERBB2;IKBKB;NOTCH1	ERBB2;ATM;CTNNB1;ILK;PDGFRB;PRKAA1;BRAF;ITGB1;FGFR1;MET;MTOR;CAV1;RPTOR;PIK3CA;NOTCH1;RELA;MAP2K1;SRC;MAP2K6;RET;EGFR;BAX;JUN;BAD;PTEN;TP53	PIK3CA;RPTOR;IKBKB;PDGFRB;FGFR1;KDR;CHUK;BAD;TP53;HDAC3;RELA;ATR;RET;KIT;JUN	ESR1;MAP2K1;BRAF;CTNNB1;NOTCH1;GATA3;MET;BAX;EP300;PDGFRA;RPTOR;ERBB3;ITGB1;RET;TNFSF11;PRKAA1;BAD;MAP2K6;AR;CAV1;ERBB2;MTOR	MTOR;NOTCH1;ESR1;PDGFRA;ITGB1;MAP2K1;EGFR;RET;BRAF;CTNNB1;MAP2K6;MET		8		20	8	13	17
GO_NEGATIVE_REGULATION_OF_RESPONSE_TO_STIMULUS	5.611	16.84	9.518	14.335	12.889	16.368	11.538	7.801	15.099	5.968	18.097		4.376	19.229	20.932	5.255	18.314	13.636	3.063	RB1;DEPTOR;SMARCA4;TP53;ANXA1;ATG7;KDM1A;STAT1;SRC;RELA;PTGS2;MYC		RPS6KB1;ERBB2;HDAC3;MTOR;ANXA1;ERBB3;TP53;ITGB1;STAT6;IGF1R;PDGFRA;AKT1S1;CAV1;MET;SOCS1;PRKAA1;GATA3;SMAD2;DEPTOR;BCL2L1;EGFR;ATM;RELA	CAV1;RELA;TP53;ERBB2	EGFR;PDGFRA;GATA3;SMAD2;ATM;MET;RPS6KB1;ERBB3;BCL2L1;DEPTOR;ERBB2;CAV1;HDAC3	BAX;MET;TSC2;ERBB2;CHEK2;PRKDC;ITGB1;PDGFRA;SMAD2;PRKAA1;PTEN;MTOR;LRP6;ESR1;FOXO1;NOTCH1;STAT6;RPS6KB1;AKT1S1;CTNNB1;KLF4;NFKBIA	TSC2;SMAD2;RB1;DEPTOR;NFKBIA;EGFR;MET;FOXO1;LRP6;ITGB1;RELA;CHEK2;RPS6KB1;ERBB2;STAT6;EZH2;KLF4;ATM;MTOR;ERBB3;CAV1;HDAC3		STAT6;AKT1S1;EGFR;TSC2;ITGB1;CAV1;PRKAA1;NFKBIA;CHEK2;RELA;MTOR;PTEN;NOTCH1;FOXO1;PRKDC;ERBB2;KLF4;MET;LRP6;SMAD2;BAX;ATM;RPS6KB1;CTNNB1		RELA;LRP6;RPS6KB1;ERBB3;CHEK2;TSC2;HDAC3;RB1;ERBB2;STAT6;CAV1;MET;ATM;FOXO1;EGFR;MTOR;DEPTOR;NFKBIA;SMAD2	SOCS1;ANXA1;MTOR;RELA;PRKAA1;TP53;STAT6;EGFR;IGF1R;AKT1S1;ITGB1	RELA;LRP6;TP53;ATG7;PRKDC;FOXO1;NFKBIA;KDM1A;CHEK2;YAP1;STAT1;EGFR;SMARCA4;NOTCH1;STAT6;RB1;KLF4;MYC;ESR1;ITGB1;RPS6KB1;HDAC3;CTNNB1;PDGFRA;MET;TSC2;MTOR;ANXA1;PTGS2;DEPTOR	TP53;ERBB2;CAV1;RELA	PTGS2;KDM1A;TP53;ANXA1;RPS6KB1;HDAC3;RELA;ATG7;MYC;SRC;STAT1;CHEK2;DEPTOR;RB1	CHEK2;NFKBIA;ITGB1;AKT1S1;KDM1A;TP53;STAT1;PRKAA1;HDAC3;PDGFRA;PTEN;CTNNB1;BAX;MTOR;PRKDC;ERBB2;MYC;TSC2;RPS6KB1;LRP6;ATG7;STAT6;DEPTOR;NOTCH1;PTGS2;SMAD2;ESR1;RB1;KLF4;MET;FOXO1;ANXA1;RELA;SRC		STAT1;ANXA1;ATG7;STAT6;TP53;SRC;RB1;DEPTOR;RPS6KB1;CHEK2;PTGS2	RPS6KB1;BAX;LRP6;RB1;STAT6;TP53;CHEK2;PRKAA1;DEPTOR;ESR1;AR;SRC;TSC2;FOXO1;CAV1;HDAC1;AKT1S1;GATA3;MET;PTGS2;PRKDC;MTOR;ERBB3;ATG7;TWIST1;NFKBIA;ANXA1;CTNNB1;SMAD2;ITGB1;STAT1;KLF4;PDGFRA;ERBB2;NOTCH1	ERBB2;ATM;CTNNB1;FOXO1;SMARCA4;PRKAA1;TSC2;ITGB1;ATG7;MYC;AKT1S1;PRKDC;ANXA1;MET;KDM1A;RPS6KB1;MTOR;DEPTOR;CAV1;NOTCH1;LRP6;STAT6;RELA;SRC;PTGS2;EGFR;SMAD2;STAT1;BAX;CHEK2;NFKBIA;KLF4;PTEN;TP53;RB1	ATG7;STAT6;STAT1;KDM1A;TP53;RB1;CHEK2;MYC;PTGS2;RPS6KB1;HDAC3;RELA;ANXA1;DEPTOR	ESR1;SMAD2;CTNNB1;TSC2;NOTCH1;GATA3;MET;BAX;NFKBIA;PDGFRA;PRKDC;LRP6;TWIST1;ERBB3;ITGB1;FOXO1;PRKAA1;CHEK2;KLF4;AKT1S1;HDAC1;AR;RPS6KB1;CAV1;ERBB2;STAT6;MTOR	MTOR;NOTCH1;ESR1;PDGFRA;CTNNB1;EGFR;NFKBIA;RPS6KB1;TSC2;MET;KLF4;CHEK2;FOXO1;STAT6;SMARCA4;ITGB1;PRKDC;LRP6;YAP1	ITGB1;SMAD2;EZH2;TSC2;KLF4	12		23	4	13	22
GO_POSITIVE_REGULATION_OF_PROTEIN_MODIFICATION_PROCESS	5.068	16.834	9.586	11.007	14.197	14.191	13.615	7.751	19.57	9.229	19.8		8.135	22.082	19.3	11.214	15.258	9.661		PIK3CA;TP53;JUN;KDM1A;ATG7;PDGFRB;FGFR1;SRC;DNMT3B;PTGS2		ERBB2;KIT;HDAC3;DNMT1;MTOR;ERBB3;TP53;IGF1R;PDGFRA;CAV1;SOCS1;PRKAA1;GATA3;CDKN1A;RPTOR;DNMT3B;STAT3;JUN;EGFR;ATM;SQSTM1	CAV1;SQSTM1;ERBB2;RPTOR;TP53	EGFR;PDGFRA;GATA3;ATM;RPTOR;STAT3;ERBB3;ERBB2;DNMT1;KIT;CAV1;HDAC3	PDGFRA;SHC1;BRAF;PRKAA1;ERBB2;RET;CHEK2;PTEN;ITGA5;MTOR;MAP2K6;CDKN1B;HDAC4;NOTCH1;MAP2K1;CTNNB1;CDKN1A	DNMT3B;MAP2K6;EGFR;DNMT1;HDAC4;PIK3CA;KDR;CHEK2;PIAS1;KIT;ERBB2;ILK;EZH2;STAT3;ATM;CDKN1B;MTOR;RPTOR;ERBB3;CAV1;HDAC3		ITGA5;CDKN1B;EGFR;CAV1;PRKAA1;CHEK2;MAP2K6;MTOR;RET;PTEN;NOTCH1;ILK;ERBB2;RPTOR;BRAF;HDAC4;MAP2K1;ATM;CDKN1A;CTNNB1		CDKN1B;STAT3;KIT;ERBB3;CHEK2;HDAC3;ERBB2;PIAS1;CAV1;DNMT1;ILK;KDR;ATM;MAP2K6;RPTOR;EGFR;MTOR;PIK3CA;HDAC4	JUN;SOCS1;MTOR;CDKN1A;PRKAA1;TP53;DNMT3B;EGFR;IGF1R;SQSTM1	HDAC4;PDGFRB;MAP2K1;TP53;ATG7;ITGA5;KDM1A;CHEK2;EGFR;NOTCH1;BRAF;KDR;JUN;KIT;STAT3;RPTOR;PIK3CA;RET;SQSTM1;DNMT1;DNMT3B;HDAC3;CTNNB1;PDGFRA;FGFR1;MAP2K6;MTOR;CDKN1B;CDKN1A;PTGS2;PIAS1	ERBB2;RPTOR;TP53;CAV1;SQSTM1	PTGS2;KDM1A;PDGFRB;TP53;KDR;CHEK2;PIK3CA;HDAC3;ATG7;STAT3;SRC;JUN;ALK;KIT;FGFR1;DNMT3B	CHEK2;PDGFRB;HDAC4;BRAF;RET;KDM1A;TP53;CDKN1B;HDAC3;PRKAA1;PDGFRA;PTEN;CTNNB1;MTOR;MAP2K6;ERBB2;FGFR1;ALK;ITGA5;JUN;KDR;STAT3;ATG7;NOTCH1;PTGS2;SHC1;PIK3CA;DNMT3B;MAP2K1;CDKN1A;KIT;SRC		ATG7;PIK3CA;TP53;SRC;KIT;DNMT1;DNMT3B;RET;CHEK2;KDR;PTGS2;PDGFRB;FGFR1;JUN	HDAC4;TP53;PDGFRB;KDR;CHEK2;PRKAA1;DNMT1;CDKN1B;AR;SRC;SQSTM1;PIK3CA;MAP2K1;CAV1;ITGA5;GATA3;RPTOR;DNMT3B;PTGS2;TNFSF11;KIT;MTOR;ERBB3;ATG7;JUN;MAP2K6;CDKN1A;BRAF;CTNNB1;RET;FGFR1;PDGFRA;ERBB2;NOTCH1	ERBB2;DNMT3B;ATM;CTNNB1;ILK;PDGFRB;PRKAA1;HDAC4;BRAF;ATG7;FGFR1;CDKN1A;ITGA5;KDM1A;MTOR;CAV1;RPTOR;PIK3CA;NOTCH1;SRC;MAP2K1;MAP2K6;RET;CDKN1B;PTGS2;EGFR;JUN;PTEN;TP53;CHEK2	ATG7;PIAS1;PIK3CA;DNMT3B;KDR;PTGS2;DNMT1;SQSTM1;KIT;CHEK2;STAT3;JUN;PDGFRB;KDM1A;RPTOR;FGFR1;TP53;HDAC3;RET	MAP2K1;BRAF;SQSTM1;ITGA5;CTNNB1;CDKN1A;NOTCH1;GATA3;HDAC4;PDGFRA;RPTOR;ERBB3;RET;TNFSF11;PRKAA1;CHEK2;MAP2K6;AR;CAV1;ERBB2;CDKN1B;MTOR	MTOR;NOTCH1;CHEK2;PDGFRA;ITGA5;HDAC4;MAP2K1;EGFR;RET;BRAF;CDKN1B;CTNNB1;CDKN1A;MAP2K6		10		21	5	12	17
GO_APOPTOTIC_PROCESS	17.89	16.709	8.84	20.927	32.297	25.441	29.352	8.357	41.783	22.092	42.819		19.889	44.265	42.097	24.372	26.204	18.909	4.39	PDK1;BRCA2;FGFR1;SRC;RB1;TP53;ATG7;STAT1;AURKA;RELA;ATG3;ITGA4;DEPTOR;ANXA1;BAD;LDHA;PIK3CA;JUN;KDM1A;PDGFRB;MAPK8;MED1;CASP7;PTGS2;MYC		BAD;RPS6KB1;HDAC3;DNMT1;MTOR;ANXA1;ERBB3;TP53;ITGB1;IGF1R;AKT1S1;CAV1;NCOA1;PRKAA1;GATA3;DEPTOR;CDKN1A;JUN;CHEK1;BCL2L1;EGFR;ATM;SQSTM1;RELA	CHEK1;RELA;CAV1;FBXO11;SQSTM1;BAD;TP53	EGFR;GATA3;ATM;CHEK1;BAD;RPS6KB1;NCOA1;ERBB3;BCL2L1;DEPTOR;DNMT1;CAV1;HDAC3	BAX;TSC2;CHEK2;PRKDC;BAK1;ITGB1;NCOA1;PRKAA1;PTEN;MTOR;MAP2K6;CDKN1B;LRP6;ESR1;CREBBP;BRAF;RET;ITGA5;FOXO1;HDAC4;NOTCH1;NFKBIA;SHC1;RPS6KB1;AKT1S1;CTNNB1;CDKN1A;KLF4;CHEK1	TSC2;BECN1;NCOA1;PDK1;DEPTOR;ATG3;RB1;MAP2K6;MAPK8;IKBKB;NFKBIA;EGFR;DNMT1;HDAC4;FOXO1;MED1;PIK3CA;LRP6;CREBBP;KDR;ITGB1;RELA;CHEK2;YWHAZ;FBXO11;RPS6KB1;PIAS1;BAK1;ILK;KLF4;CHEK1;ATM;CDKN1B;MTOR;CASP3;ERBB3;CAV1;HDAC3;BAD	FBXO11;BAD	ITGA5;CDKN1B;EGFR;AKT1S1;CREBBP;TSC2;NCOA1;ITGB1;CAV1;PRKAA1;NFKBIA;CHEK2;MAP2K6;RELA;MTOR;RET;PTEN;CHEK1;NOTCH1;ILK;FOXO1;BAD;PRKDC;PDK1;KLF4;LRP6;BRAF;HDAC4;BAX;ATM;RPS6KB1;CDKN1A;CTNNB1		CDKN1B;RELA;BAD;MED1;CREBBP;LRP6;RPS6KB1;CASP3;ERBB3;PDK1;CHEK2;TSC2;HDAC3;RB1;PIAS1;CAV1;MAPK8;DNMT1;ILK;ATG3;KDR;BECN1;ATM;CHEK1;MAP2K6;FOXO1;EGFR;MTOR;PIK3CA;DEPTOR;IKBKB;HDAC4;NCOA1;NFKBIA	JUN;AKT1S1;ANXA1;MTOR;CDKN1A;RELA;PRKAA1;TP53;EGFR;IGF1R;SQSTM1;ITGB1	HDAC4;RELA;PDGFRB;CHEK1;LRP6;TP53;ATG7;PRKDC;FOXO1;PDK1;ITGA5;NFKBIA;KDM1A;CHEK2;YAP1;CREBBP;AURKA;EGFR;NOTCH1;STAT1;ITGA4;RB1;LDHA;KLF4;IKBKB;BRAF;KDR;MYC;CASP7;JUN;BRCA2;CASP3;PIK3CA;ATG3;RET;ESR1;SQSTM1;MAPK8;DNMT1;ITGB1;RPS6KB1;HDAC3;CTNNB1;MAP2K6;FGFR1;NCOA1;BAD;TSC2;HK2;MTOR;CDKN1B;CDKN1A;ANXA1;PTGS2;DEPTOR;PIAS1	CHEK1;TP53;CAV1;RELA;SQSTM1	KDM1A;TP53;CASP3;CASP7;HDAC3;SRC;CHEK2;FGFR1;STAT1;BRCA2;RPS6KB1;LDHA;ITGA4;PDK1;RELA;MAPK8;BAD;ATG7;AURKA;JUN;ALK;PDGFRB;KDR;ANXA1;ATG3;RB1;IKBKB;PTGS2;PIK3CA;MYC;DEPTOR	AURKA;CHEK2;ATG3;BRCA2;PDGFRB;CHEK1;HDAC4;BRAF;NFKBIA;RET;AKT1S1;ITGB1;TP53;CDKN1B;STAT1;KDM1A;PRKAA1;HDAC3;LDHA;PTEN;CTNNB1;BAX;CASP3;NCOA1;MTOR;PRKDC;MAP2K6;MYC;CREBBP;FGFR1;ALK;CASP7;RPS6KB1;JUN;KDR;ITGA5;TSC2;PDK1;LRP6;ATG7;IKBKB;DEPTOR;NOTCH1;PTGS2;SHC1;BAK1;PIK3CA;MAPK8;ESR1;BAD;RB1;KLF4;ITGA4;FOXO1;CDKN1A;ANXA1;RELA;SRC		CHEK1;IKBKB;STAT1;DEPTOR;CASP7;CHEK2;PTGS2;CASP3;LDHA;RPS6KB1;AURKA;PDGFRB;MAPK8;FGFR1;JUN;ANXA1;DNMT1;PDK1;BRCA2;RET;ATG7;PIK3CA;BAD;TP53;SRC;RB1;ATG3;KDR	RPS6KB1;FGFR1;BAX;EP300;CHEK1;HDAC4;RB1;LRP6;ATG3;PDGFRB;KDR;TP53;CHEK2;PRKAA1;DEPTOR;DNMT1;ESR1;CDKN1B;CREBBP;AR;SRC;TSC2;PIK3CA;SQSTM1;CAV1;HDAC1;FOXO1;AKT1S1;ITGA5;MED1;GATA3;IKBKB;PTGS2;PDK1;CASP3;PRKDC;AURKA;BRCA2;MTOR;BAD;ERBB3;ATG7;TWIST1;JUN;MAP2K6;NFKBIA;CDKN1A;NCOA1;ANXA1;BRAF;MAPK8;CTNNB1;ITGB1;STAT1;RET;KLF4;LDHA;CASP7;NOTCH1	ATM;NCOA1;CTNNB1;ILK;FOXO1;PDGFRB;PRKAA1;HDAC4;ITGA4;BRAF;TSC2;PDK1;ITGB1;MYC;ATG7;FGFR1;PRKDC;CDKN1A;ANXA1;ITGA5;KDM1A;PTEN;MTOR;DEPTOR;CAV1;MED1;CREBBP;PIK3CA;NOTCH1;ATG3;LRP6;MAPK8;RELA;SRC;KLF4;CASP7;MAP2K6;BRCA2;AURKA;RET;CDKN1B;CHEK1;PTGS2;EGFR;LDHA;STAT1;BAX;CHEK2;JUN;NFKBIA;BAD;RPS6KB1;AKT1S1;TP53;RB1	ATG7;PIAS1;PIK3CA;KDR;BAD;RB1;PTGS2;RELA;DNMT1;SQSTM1;ANXA1;CASP7;ITGA4;HK2;IKBKB;LDHA;STAT1;MAPK8;ATG3;CHEK2;CHEK1;DEPTOR;JUN;PDGFRB;KDM1A;BRCA2;PDK1;FGFR1;TP53;MYC;RPS6KB1;HDAC3;CASP3;AURKA;RET	ESR1;BRAF;NCOA1;SQSTM1;ITGA5;CTNNB1;TSC2;CDKN1A;NOTCH1;GATA3;BAX;HDAC4;MED1;EP300;NFKBIA;PRKDC;LRP6;TWIST1;ERBB3;ITGB1;RET;FOXO1;PRKAA1;BAD;CHEK2;KLF4;AKT1S1;HDAC1;MAP2K6;AR;RPS6KB1;CAV1;CREBBP;CDKN1B;MTOR	MTOR;NOTCH1;ESR1;HDAC4;CREBBP;RET;CTNNB1;EGFR;CDKN1A;MAP2K6;NFKBIA;RPS6KB1;TSC2;KLF4;CHEK2;NCOA1;FOXO1;ITGB1;PRKDC;BRAF;CDKN1B;LRP6;ITGA5;YAP1	ITGB1;MED1;TSC2;FBXO11;KLF4;BAK1;YWHAZ	25		24	7	13	29
GO_POSITIVE_REGULATION_OF_CELL_POPULATION_PROLIFERATION	9.013	16.206	8.237	12.678	12.781	12.491	11.871	8.73	21.49	9.698	23.066		6.443	23.176	19.952	10.909	17.547	9.812	2.125	FGFR1;ANXA1;JUN;KDM1A;PDGFRB;STAT1;BAD;ITGA4;MED1;STAT5A;RELA;PTGS2;MYC		BAD;ERBB2;KIT;DNMT1;MTOR;ANXA1;ERBB3;ITGB1;IGF1R;PDGFRA;PRKAA1;CDKN1A;RPTOR;STAT3;JUN;BCL2L1;EGFR;STAT5A;RELA	RPTOR;RELA;BAD;ERBB2	EGFR;PDGFRA;BAD;RPTOR;STAT3;ERBB3;BCL2L1;ERBB2;KIT;DNMT1	ESR1;CLDN1;PDGFRA;SHC1;PRKAA1;ERBB2;PRKDC;PTEN;ASH2L;MTOR;CDKN1B;ITGB1;HDAC4;NOTCH1;CTNNB1;CDKN1A;SIRT6	MED1;STAT3;CDKN1B;SIRT6;MTOR;KDR;EGFR;DNMT1;ITGB1;KIT;RELA;HDAC4;ERBB2;ILK;RPTOR;ERBB3;EZH2;BAD		ILK;HDAC4;BAD;SIRT6;RELA;PRKDC;ERBB2;RPTOR;CDKN1B;EGFR;MTOR;CDKN1A;PTEN;CTNNB1;ITGB1;NOTCH1;PRKAA1		ERBB3;CDKN1B;ERBB2;KIT;RPTOR;EGFR;MTOR;DNMT1;ILK;MED1;KDR;STAT3;RELA;HDAC4;BAD;SIRT6	JUN;ANXA1;STAT5A;MTOR;CDKN1A;RELA;PRKAA1;EGFR;IGF1R;ITGB1	HDAC4;RELA;PDGFRB;STAT5A;PRKDC;KDM1A;YAP1;STAT1;EGFR;NOTCH1;ITGA4;KDR;MYC;JUN;KIT;STAT3;RPTOR;ESR1;DNMT1;ITGB1;CTNNB1;PDGFRA;FGFR1;BAD;MTOR;CDKN1B;ASH2L;CDKN1A;ANXA1;PTGS2	ERBB2;RPTOR;RELA	STAT5A;KDM1A;PDGFRB;PTGS2;KDR;ANXA1;ITGA4;RELA;BAD;MYC;STAT3;JUN;KIT;FGFR1;STAT1	CLDN1;PDGFRB;HDAC4;STAT5A;ITGB1;CDKN1B;STAT1;PRKAA1;PDGFRA;PTEN;CTNNB1;MTOR;SIRT6;PRKDC;ERBB2;MYC;FGFR1;JUN;KDR;STAT3;ASH2L;NOTCH1;PTGS2;SHC1;ESR1;BAD;ITGA4;CDKN1A;ANXA1;RELA;KIT;KDM1A		STAT1;ANXA1;BAD;KIT;DNMT1;STAT5A;KDR;PTGS2;PDGFRB;FGFR1;JUN	FGFR1;HDAC4;PDGFRB;KDR;PRKAA1;DNMT1;ESR1;CDKN1B;AR;ASH2L;HDAC1;CLDN1;MED1;RPTOR;PTGS2;KIT;PRKDC;STAT5A;MTOR;BAD;ERBB3;TWIST1;JUN;CDKN1A;ANXA1;CTNNB1;ITGB1;STAT1;SIRT6;PDGFRA;ERBB2;NOTCH1	ERBB2;CTNNB1;ILK;PDGFRB;PRKAA1;HDAC4;ITGA4;SIRT6;ITGB1;MYC;FGFR1;PRKDC;CDKN1A;ANXA1;KDM1A;MTOR;MED1;RPTOR;NOTCH1;RELA;CDKN1B;PTGS2;EGFR;STAT1;JUN;BAD;STAT5A;PTEN	RPTOR;PDGFRB;STAT1;FGFR1;KDM1A;KDR;STAT5A;BAD;MYC;PTGS2;RELA;DNMT1;ANXA1;STAT3;ITGA4;KIT;JUN	ESR1;CTNNB1;CDKN1A;NOTCH1;HDAC4;MED1;ASH2L;PDGFRA;PRKDC;RPTOR;TWIST1;ERBB3;ITGB1;PRKAA1;SIRT6;CLDN1;BAD;HDAC1;AR;ERBB2;CDKN1B;MTOR	MTOR;ASH2L;NOTCH1;ESR1;PDGFRA;HDAC4;ITGB1;EGFR;PRKDC;CDKN1B;CTNNB1;CDKN1A;YAP1	MED1;EZH2;ITGB1	13		19	4	10	17
GO_CYTOKINE_MEDIATED_SIGNALING_PATHWAY	11.044	16.103	4.241	4.293	12.781	6.895	10.536	12.191	19.929	14.218	18.095		11.5	20.519	15.994	14.332	10.401	6.112	3.143	STAT2;PIK3CA;SMARCA4;TP53;ANXA1;FOS;STAT1;BAD;STAT5A;MED1;SRC;RELA;PTGS2;MYC		BAD;STAT6;KIT;CDKN1A;CAV1;FOS;SOCS1;VIM;BCL2L1;GATA3;STAT3;TP53;ANXA1;SQSTM1;ITGB1;STAT4;STAT5A;RELA	RELA;CAV1;FOS;SQSTM1;BAD;CHUK;TP53	GATA3;BAD;STAT3;BCL2L1;KIT;CAV1	SHC1;VIM;JAK1;FOXO1;CDKN1A;ITGB1;STAT6;NFKBIA	MED1;STAT3;FOXO1;VIM;PIAS1;PIK3CA;NFKBIA;IKBKB;CASP3;KIT;ITGB1;RELA;YWHAZ;STAT6;ILK;CAV1;BAD		ILK;FOXO1;BAD;VIM;RELA;STAT6;CAV1;CDKN1A;ITGB1;JAK1;NFKBIA		CASP3;FOXO1;KIT;STAT6;PIAS1;CAV1;PIK3CA;ILK;IKBKB;MED1;STAT3;RELA;BAD;NFKBIA	SOCS1;ANXA1;VIM;STAT5A;STAT4;CDKN1A;RELA;STAT6;TP53;FOS;SQSTM1;ITGB1	VIM;RELA;STAT5A;TP53;FOXO1;CHUK;NFKBIA;YAP1;STAT1;SMARCA4;STAT6;ZEB1;IKBKB;MYC;KIT;STAT3;CASP3;PIK3CA;SQSTM1;ITGB1;BAD;STAT2;FOS;CDKN1A;ANXA1;PTGS2;PIAS1	FOS;TP53;CAV1;CHUK;RELA;SQSTM1	STAT5A;PTGS2;TP53;FOS;STAT2;ANXA1;CHUK;CASP3;PIK3CA;RELA;BAD;STAT4;MYC;STAT3;SRC;KIT;STAT1;IKBKB	NFKBIA;ITGB1;STAT5A;JAK1;TP53;STAT1;CHUK;CASP3;VIM;STAT2;MYC;STAT3;FOS;STAT4;STAT6;IKBKB;PTGS2;SHC1;PIK3CA;BAD;FOXO1;CDKN1A;ANXA1;RELA;KIT;SRC		IKBKB;STAT2;STAT1;ANXA1;PIK3CA;STAT4;BAD;STAT6;TP53;SRC;KIT;FOS;PTGS2;STAT5A;CASP3	STAT6;TP53;ZEB1;SRC;SQSTM1;PIK3CA;FOXO1;CAV1;STAT2;MED1;GATA3;STAT4;PTGS2;TNFSF11;KIT;CASP3;JAK1;STAT5A;BAD;TWIST1;VIM;CDKN1A;NFKBIA;ANXA1;FOS;ITGB1;STAT1;IKBKB	ILK;FOXO1;SMARCA4;ITGB1;JAK1;MYC;CDKN1A;ANXA1;CAV1;FOS;MED1;STAT2;PIK3CA;STAT6;RELA;SRC;VIM;PTGS2;STAT1;NFKBIA;BAD;STAT5A;TP53	PIK3CA;PIAS1;BAD;PTGS2;RELA;ANXA1;SQSTM1;KIT;IKBKB;STAT1;STAT3;STAT6;FOS;CHUK;STAT5A;TP53;MYC;CASP3;STAT2	NFKBIA;ZEB1;TWIST1;JAK1;ITGB1;FOXO1;CAV1;CDKN1A;TNFSF11;GATA3;BAD;STAT6;MED1;SQSTM1;VIM	FOXO1;STAT6;ITGB1;SMARCA4;VIM;CDKN1A;YAP1;ZEB1;NFKBIA	MED1;ITGB1;YWHAZ;VIM	14		18	7	6	8
GO_POSITIVE_REGULATION_OF_PHOSPHORUS_METABOLIC_PROCESS	3.737	16.005	9.847	11.384	12.5	15.852	12.919	6.708	15.985	7.701	18.385		6.542	19.566	17.8	7.796	15.768	9.951		PIK3CA;TP53;JUN;PDGFRB;BAD;FGFR1;SRC;PTGS2		BAD;ERBB2;KIT;HDAC3;MTOR;ERBB3;TP53;IGF1R;PDGFRA;CAV1;MET;SOCS1;PRKAA1;CDKN1A;RPTOR;STAT3;JUN;EGFR;ATM;SQSTM1	CAV1;SQSTM1;BAD;ERBB2;RPTOR;TP53	EGFR;PDGFRA;ATM;MET;BAD;RPTOR;STAT3;ERBB3;ERBB2;KIT;CAV1;HDAC3	PDGFRA;MET;SHC1;BRAF;PRKAA1;ERBB2;RET;CHEK2;PTEN;ITGA5;MTOR;MAP2K6;CDKN1B;CTNNB1;NOTCH1;MAP2K1;CDKN1A	MAP2K6;EGFR;MET;PIK3CA;KDR;CHEK2;KIT;ERBB2;ILK;EZH2;STAT3;ATM;CDKN1B;MTOR;RPTOR;ERBB3;CAV1;HDAC3;BAD		ITGA5;CDKN1B;EGFR;CAV1;PRKAA1;CHEK2;MAP2K6;MTOR;RET;PTEN;NOTCH1;ILK;BAD;ERBB2;RPTOR;MET;BRAF;MAP2K1;ATM;CDKN1A;CTNNB1		ERBB3;CDKN1B;ERBB2;MAP2K6;RPTOR;KIT;CHEK2;CAV1;MET;EGFR;MTOR;PIK3CA;ILK;HDAC3;KDR;STAT3;BAD;ATM	JUN;SOCS1;MTOR;CDKN1A;PRKAA1;TP53;EGFR;IGF1R;SQSTM1	PDGFRB;MAP2K1;TP53;ITGA5;CHEK2;EGFR;NOTCH1;BRAF;KDR;JUN;KIT;STAT3;RPTOR;PIK3CA;RET;SQSTM1;HDAC3;CTNNB1;PDGFRA;FGFR1;MAP2K6;BAD;MET;MTOR;CDKN1B;CDKN1A;PTGS2	ERBB2;RPTOR;TP53;CAV1;SQSTM1	PTGS2;PDGFRB;TP53;KDR;CHEK2;PIK3CA;HDAC3;BAD;STAT3;SRC;JUN;ALK;KIT;FGFR1	CHEK2;PDGFRB;BRAF;RET;TP53;CDKN1B;HDAC3;PRKAA1;PDGFRA;PTEN;CTNNB1;MTOR;MAP2K6;ERBB2;FGFR1;ALK;ITGA5;JUN;KDR;STAT3;NOTCH1;PTGS2;SHC1;PIK3CA;BAD;MAP2K1;MET;CDKN1A;KIT;SRC		PIK3CA;BAD;TP53;SRC;KIT;RET;CHEK2;KDR;PTGS2;PDGFRB;FGFR1;JUN	FGFR1;CHEK2;PDGFRB;KDR;TP53;PRKAA1;CDKN1B;AR;SRC;SQSTM1;PIK3CA;MAP2K1;CAV1;ITGA5;RPTOR;PTGS2;TNFSF11;KIT;MTOR;BAD;ERBB3;JUN;MAP2K6;CDKN1A;BRAF;CTNNB1;RET;MET;PDGFRA;ERBB2;NOTCH1	ERBB2;ATM;CTNNB1;ILK;PDGFRB;PRKAA1;BRAF;FGFR1;CDKN1A;MET;ITGA5;MTOR;CAV1;RPTOR;PIK3CA;NOTCH1;SRC;MAP2K1;MAP2K6;RET;CDKN1B;PTGS2;EGFR;JUN;BAD;PTEN;TP53;CHEK2	PIK3CA;RPTOR;PDGFRB;FGFR1;KDR;BAD;TP53;CHEK2;PTGS2;HDAC3;STAT3;SQSTM1;RET;KIT;JUN	MAP2K1;BRAF;SQSTM1;ITGA5;CTNNB1;CDKN1A;NOTCH1;MET;PDGFRA;RPTOR;ERBB3;RET;TNFSF11;PRKAA1;BAD;CHEK2;MAP2K6;AR;CAV1;ERBB2;CDKN1B;MTOR	MTOR;NOTCH1;CHEK2;PDGFRA;ITGA5;MAP2K1;EGFR;RET;BRAF;CDKN1B;CTNNB1;CDKN1A;MAP2K6;MET		8		20	6	12	17
GO_POSITIVE_REGULATION_OF_RNA_BIOSYNTHETIC_PROCESS	12.541	15.953	8.545	15.693	20.028	19.018	21.438	7.945	36.987	16.871	32.996		12.64	36.929	31.884	19.774	26.204	19.208	1.618	STAT2;SMARCC1;BRCA2;PHF2;SRC;KAT2B;CCNC;RB1;TP53;STAT1;STAT5A;RELA;SMARCA4;FOS;FOXK2;JUN;KDM1A;MED1;MYC		ERBB2;HDAC3;FOS;MTOR;TP53;STAT6;NCOA1;MET;PRKAA1;GATA3;SMAD2;RPTOR;STAT3;JUN;CHEK1;PHF8;EGFR;ATM;SQSTM1;STAT4;STAT5A;RELA	CHEK1;RELA;FOS;SQSTM1;ERBB2;RPTOR;CHUK;TP53	EGFR;GATA3;SMAD2;ATM;CHEK1;MET;PHF8;NCOA1;RPTOR;STAT3;ERBB2;HDAC3	MET;ERBB2;CHEK2;PRKDC;ASH2L;NCOA1;SMAD2;PRKAA1;MTOR;LRP6;ESR1;CREBBP;RET;FOXO1;HDAC4;NOTCH1;NFKBIA;STAT6;SHC1;CTNNB1;KLF4;MAP2K1;CHEK1	SMAD2;NCOA1;CTBP2;NFKBIA;IKBKB;EGFR;HDAC4;MET;FOXO1;PHF8;MED1;LRP6;CREBBP;RELA;CHEK2;PIAS1;ERBB2;STAT6;ILK;KLF4;CHEK1;STAT3;NCOA3;ATM;MTOR;RPTOR;RB1;HDAC3		STAT6;EGFR;CREBBP;PGR;NCOA1;PRKAA1;NFKBIA;CHEK2;RELA;MTOR;RET;CHEK1;NOTCH1;ILK;FOXO1;PRKDC;ERBB2;RPTOR;KLF4;MET;LRP6;SMAD2;HDAC4;MAP2K1;ATM;CTNNB1		CTBP2;STAT3;RELA;MED1;CREBBP;LRP6;CHEK2;HDAC3;RB1;PHF8;ERBB2;STAT6;PIAS1;MET;NCOA3;ILK;ATM;CHEK1;FOXO1;RPTOR;EGFR;MTOR;IKBKB;HDAC4;NCOA1;NFKBIA;SMAD2	JUN;STAT5A;MTOR;STAT4;RELA;PRKAA1;TP53;STAT6;EGFR;FOS;SQSTM1	HDAC4;SMARCC1;RELA;MAP2K1;CHEK1;KAT2B;MED23;STAT5A;LRP6;TP53;PRKDC;FOXO1;CHUK;NFKBIA;KDM1A;CHEK2;YAP1;CREBBP;STAT1;EGFR;NOTCH1;SMARCA4;STAT6;ZEB1;RB1;KLF4;IKBKB;MYC;JUN;KDM5A;BRCA2;STAT3;CCNC;RPTOR;RET;ESR1;SQSTM1;NCOA3;HDAC3;CTNNB1;NCOA1;PHF2;MET;STAT2;MTOR;FOS;ASH2L;FOXK2;PIAS1	FOS;CHEK1;ERBB2;RPTOR;TP53;CHUK;RELA;SQSTM1	STAT5A;KDM1A;TP53;PHF2;HDAC3;STAT3;SRC;CHEK2;SMARCE1;NCOA3;STAT1;STAT4;BRCA2;STAT2;RELA;CCNC;JUN;SMARCC1;FOS;FOXK2;KAT2B;RB1;IKBKB;CHUK;MYC	CHEK2;BRCA2;NCOA3;CHEK1;HDAC4;NFKBIA;STAT5A;RET;KDM1A;TP53;CHUK;STAT1;PRKAA1;HDAC3;CTNNB1;NCOA1;MTOR;STAT2;PRKDC;FOXK2;ERBB2;MYC;CREBBP;SMARCE1;JUN;STAT3;FOS;STAT4;LRP6;ASH2L;STAT6;IKBKB;KAT2B;NOTCH1;SHC1;SMAD2;ESR1;PHF2;RB1;KLF4;MAP2K1;MET;FOXO1;RELA;CCNC;SMARCC1;SRC		CHEK1;IKBKB;STAT1;KAT2B;CHEK2;CCNC;STAT5A;STAT2;STAT6;FOXK2;FOS;JUN;STAT4;BRCA2;RET;SMARCC1;TP53;SRC;RB1;PHF2	EP300;CHEK1;HDAC4;RB1;LRP6;STAT6;CCNC;TP53;CHEK2;ZEB1;PRKAA1;FOXK2;ESR1;CREBBP;KAT2B;AR;SRC;SQSTM1;MAP2K1;ASH2L;HDAC1;FOXO1;KDM5A;STAT2;MED1;GATA3;MET;RPTOR;STAT4;TNFSF11;PRKDC;BRCA2;STAT5A;PHF2;SMARCC2;MTOR;SMARCC1;TWIST1;JUN;NFKBIA;NCOA1;FOS;CTNNB1;SMAD2;STAT1;RET;KLF4;ERBB2;IKBKB;NOTCH1	ERBB2;ATM;CTNNB1;PHF2;ILK;FOXO1;NCOA1;SMARCA4;PRKAA1;HDAC4;MYC;PRKDC;MET;KDM1A;MTOR;FOS;MED1;KAT2B;CREBBP;STAT2;SMARCC1;RPTOR;PGR;NOTCH1;LRP6;STAT6;RELA;MAP2K1;SRC;CCNC;BRCA2;RET;CHEK1;EGFR;FOXK2;SMAD2;STAT1;CHEK2;JUN;NFKBIA;STAT5A;KLF4;TP53;RB1	PIAS1;RB1;RELA;SQSTM1;FOXK2;IKBKB;STAT1;CHEK2;CHEK1;STAT3;JUN;STAT6;NCOA3;FOS;PHF2;KDM1A;SMARCC1;CHUK;CCNC;STAT5A;BRCA2;MED23;RPTOR;KAT2B;TP53;MYC;HDAC3;RET;STAT2	ESR1;MAP2K1;SMARCC2;SMAD2;NCOA1;SQSTM1;CTNNB1;KDM5A;NOTCH1;GATA3;MET;HDAC4;MED1;ASH2L;EP300;NFKBIA;PRKDC;RPTOR;LRP6;TWIST1;RET;FOXO1;TNFSF11;PRKAA1;CHEK2;KLF4;ZEB1;HDAC1;AR;CREBBP;ERBB2;STAT6;MTOR	MTOR;NOTCH1;ESR1;HDAC4;CREBBP;RET;CTNNB1;EGFR;NFKBIA;ASH2L;MAP2K1;MET;KDM5A;KLF4;ZEB1;CHEK2;NCOA1;FOXO1;STAT6;SMARCA4;PRKDC;LRP6;YAP1	MED1;KLF4;SMAD2	19		22	8	12	23
GO_REGULATION_OF_PHOSPHORYLATION	7.383	15.791	9.58	20.38	23.585	23.845	21.37	6.684	26.747	13.517	33.863		11.478	35.389	30.437	13.086	25.989	14.935	3.076	STAT2;CCNC;PIK3CA;RB1;DEPTOR;TP53;JUN;PDGFRB;BAD;FGFR1;SRC;PTGS2;MYC;KAT2B		BAD;ERBB2;KIT;HDAC3;MTOR;ERBB3;TP53;IGF1R;PDGFRA;AKT1S1;CAV1;MET;SOCS1;PRKAA1;DEPTOR;CDKN1A;RPTOR;STAT3;JUN;EGFR;ATM;SQSTM1	CAV1;SQSTM1;BAD;ERBB2;RPTOR;TP53	EGFR;PDGFRA;ATM;MET;BAD;RPTOR;STAT3;ERBB3;DEPTOR;ERBB2;KIT;CAV1;HDAC3	BAX;MET;TSC2;ERBB2;CHEK2;PRKDC;BAK1;SIRT6;PDGFRA;PRKAA1;PTEN;MTOR;MAP2K6;CDKN1B;LRP6;BRAF;RET;ITGA5;FOXO1;HDAC4;NOTCH1;SHC1;AKT1S1;CTNNB1;CDKN1A;KLF4;MAP2K1	TSC2;RB1;DEPTOR;MAP2K6;IKBKB;EGFR;HDAC4;MET;SIRT6;FOXO1;PIK3CA;LRP6;KDR;CHEK2;YWHAZ;BAK1;KIT;ERBB2;ILK;EZH2;KLF4;STAT3;ATM;CDKN1B;MTOR;CASP3;RPTOR;ERBB3;CAV1;HDAC3;BAD		ITGA5;SIRT6;CDKN1B;AKT1S1;EGFR;TSC2;CAV1;PRKAA1;CHEK2;MAP2K6;MTOR;RET;PTEN;NOTCH1;ILK;FOXO1;BAD;PRKDC;ERBB2;RPTOR;KLF4;MET;LRP6;BRAF;HDAC4;BAX;MAP2K1;ATM;CDKN1A;CTNNB1		CDKN1B;STAT3;KIT;BAD;LRP6;CASP3;ERBB3;CHEK2;TSC2;HDAC3;RB1;ERBB2;CAV1;MET;ILK;KDR;ATM;FOXO1;MAP2K6;RPTOR;EGFR;MTOR;PIK3CA;DEPTOR;IKBKB;HDAC4;SIRT6	JUN;SOCS1;AKT1S1;MTOR;CDKN1A;PRKAA1;TP53;EGFR;IGF1R;SQSTM1	HDAC4;PDGFRB;MAP2K1;KAT2B;LRP6;TP53;PRKDC;FOXO1;ITGA5;CHEK2;EGFR;NOTCH1;RB1;KLF4;IKBKB;BRAF;KDR;MYC;JUN;KIT;STAT3;CASP3;CCNC;RPTOR;PIK3CA;RET;SQSTM1;HDAC3;CTNNB1;PDGFRA;FGFR1;MAP2K6;BAD;MET;TSC2;STAT2;MTOR;CDKN1B;CDKN1A;PTGS2;DEPTOR	ERBB2;RPTOR;TP53;CAV1;SQSTM1	TP53;CASP3;HDAC3;STAT3;SRC;CHEK2;KIT;FGFR1;STAT2;BAD;CCNC;JUN;ALK;PDGFRB;KDR;KAT2B;RB1;IKBKB;PTGS2;PIK3CA;MYC;DEPTOR	CHEK2;PDGFRB;HDAC4;BRAF;RET;AKT1S1;TP53;CDKN1B;HDAC3;PRKAA1;PDGFRA;PTEN;CTNNB1;CASP3;BAX;MTOR;STAT2;SIRT6;PRKDC;MAP2K6;ERBB2;MYC;FGFR1;ALK;ITGA5;TSC2;JUN;KDR;STAT3;LRP6;IKBKB;DEPTOR;KAT2B;NOTCH1;PTGS2;SHC1;BAK1;PIK3CA;BAD;RB1;KLF4;MAP2K1;MET;FOXO1;CDKN1A;CCNC;KIT;SRC		IKBKB;DEPTOR;KAT2B;CHEK2;PTGS2;CCNC;CASP3;STAT2;KIT;FGFR1;PDGFRB;JUN;RET;PIK3CA;BAD;TP53;SRC;RB1;KDR	BAX;EP300;LRP6;HDAC4;RB1;CCNC;KDR;PDGFRB;TP53;CHEK2;PRKAA1;DEPTOR;CDKN1B;KAT2B;AR;SRC;TSC2;PIK3CA;MAP2K1;CAV1;SQSTM1;FOXO1;STAT2;AKT1S1;ITGA5;SIRT6;MET;RPTOR;PTGS2;TNFSF11;KIT;CASP3;PRKDC;MTOR;BAD;ERBB3;TWIST1;JUN;MAP2K6;CDKN1A;BRAF;CTNNB1;KLF4;RET;FGFR1;PDGFRA;ERBB2;IKBKB;NOTCH1	ERBB2;ATM;CTNNB1;ILK;FOXO1;PDGFRB;PRKAA1;HDAC4;SIRT6;BRAF;TSC2;MYC;FGFR1;PRKDC;CDKN1A;MET;ITGA5;PTEN;MTOR;DEPTOR;CAV1;KAT2B;STAT2;RPTOR;PIK3CA;NOTCH1;LRP6;SRC;MAP2K1;CCNC;MAP2K6;RET;CDKN1B;PTGS2;EGFR;BAX;CHEK2;JUN;BAD;KLF4;AKT1S1;TP53;RB1	PIK3CA;KDR;BAD;RB1;PTGS2;SQSTM1;KIT;IKBKB;CHEK2;STAT3;DEPTOR;JUN;PDGFRB;CCNC;RPTOR;FGFR1;KAT2B;TP53;MYC;HDAC3;CASP3;RET;STAT2	MAP2K1;BRAF;SQSTM1;ITGA5;CTNNB1;TSC2;CDKN1A;NOTCH1;MET;BAX;HDAC4;EP300;PDGFRA;PRKDC;RPTOR;LRP6;TWIST1;ERBB3;RET;FOXO1;TNFSF11;PRKAA1;SIRT6;BAD;CHEK2;KLF4;AKT1S1;MAP2K6;AR;CAV1;ERBB2;CDKN1B;MTOR	MTOR;NOTCH1;PDGFRA;HDAC4;RET;CTNNB1;EGFR;CDKN1A;MAP2K6;MAP2K1;TSC2;MET;KLF4;CHEK2;FOXO1;PRKDC;BRAF;CDKN1B;LRP6;ITGA5	EZH2;TSC2;KLF4;BAK1;YWHAZ	14		22	6	13	27
GO_RESPONSE_TO_RADIATION	8.816	15.783	5.5	9.491	12.696	10.641	9.764	11.529	20.946	11.512	20.367		9.569	16.608	18.86	14.616	7.682	6.883	2.831	BRCA2;TP53;ANXA1;FOS;KDM1A;RELA;MAPK8;DNMT3B;PTGS2;MYC		EGFR;KIT;CDKN1A;FOS;PRKAA1;GATA3;ATM;DNMT3B;MTOR;ITGB1;ANXA1;TP53;CHEK1;BCL2L1;RELA	CHEK1;RELA;ATR;FOS;TP53	EGFR;GATA3;ATM;CHEK1;BCL2L1;KIT	BAX;CREBBP;PRKAA1;ATR;CHEK2;PRKDC;MTOR;BAK1;CDKN1A;ITGB1;CHEK1	RELA;CHEK1;DNMT3B;PIAS1;ATM;MTOR;CREBBP;MAPK8;BAK1;CASP3;EGFR;KIT;ITGB1;CHEK2		CHEK2;BAX;PRKDC;RELA;MTOR;EGFR;CREBBP;ATM;CDKN1A;CHEK1;ITGB1;PRKAA1		CASP3;CHEK1;CREBBP;PIAS1;CHEK2;EGFR;MAPK8;MTOR;RELA;KIT;ATM	ANXA1;MTOR;CDKN1A;RELA;PRKAA1;TP53;DNMT3B;EGFR;FOS;ITGB1	RELA;CHEK1;TP53;PRKDC;KDM1A;CHEK2;YAP1;CREBBP;EGFR;MYC;KIT;BRCA2;CASP3;MAPK8;ITGB1;DNMT3B;MTOR;FOS;ATR;CDKN1A;ANXA1;PTGS2;PIAS1	FOS;CHEK1;TP53;RELA;ATR	PTGS2;KDM1A;TP53;FOS;BRCA2;ANXA1;CASP3;RELA;MAPK8;MYC;CHEK2;KIT;DNMT3B	ATR;CHEK2;BRCA2;CHEK1;ITGB1;TP53;PRKAA1;BAX;CASP3;MTOR;PRKDC;MYC;CREBBP;FOS;PTGS2;BAK1;MAPK8;DNMT3B;CDKN1A;ANXA1;RELA;KIT;KDM1A		CHEK1;ANXA1;TP53;KIT;FOS;DNMT3B;BRCA2;CHEK2;PTGS2;MAPK8;CASP3	BAX;EP300;CHEK1;CHEK2;TP53;PRKAA1;CREBBP;GATA3;DNMT3B;PTGS2;KIT;CASP3;PRKDC;MTOR;CDKN1A;ANXA1;FOS;MAPK8;ITGB1;BRCA2	DNMT3B;ATM;PRKAA1;ITGB1;MYC;PRKDC;CDKN1A;ANXA1;KDM1A;MTOR;FOS;CREBBP;MAPK8;RELA;BRCA2;CHEK1;PTGS2;EGFR;BAX;TP53;CHEK2	PIAS1;FOS;MAPK8;DNMT3B;KDM1A;TP53;BRCA2;CHEK2;MYC;PTGS2;CHEK1;CASP3;RELA;ANXA1;ATR;KIT	EP300;PRKDC;ITGB1;CREBBP;CDKN1A;PRKAA1;BAX;GATA3;CHEK2;MTOR	MTOR;CHEK2;ITGB1;CREBBP;PRKDC;CDKN1A;EGFR;YAP1	ITGB1;BAK1;DNMT3B	10		15	5	6	11
GO_RESPONSE_TO_ABIOTIC_STIMULUS	14.474	15.672	6.163	13.287	16.586	17.819	14.931	10.331	26.523	15.801	29.095		14.683	28.071	30.183	17.89	14.175	8.6	1.892	PDK1;BRCA2;SRC;TP53;ATG7;STAT1;EIF4EBP1;RELA;ANXA1;FOS;BAD;LDHA;JUN;KDM1A;PDGFRB;MAPK8;DNMT3B;PTGS2;MYC		BAD;KIT;FOS;MTOR;ANXA1;TP53;ITGB1;AKT1S1;CAV1;PRKAA1;GATA3;CDKN1A;RPTOR;DNMT3B;JUN;CHEK1;BCL2L1;EGFR;ATM;RELA	CHEK1;RELA;ATR;CAV1;FOS;BAD;RPTOR;TP53	EGFR;GATA3;ATM;CHEK1;BAD;RPTOR;BCL2L1;KIT;CAV1	BAX;ATR;CHEK2;PRKDC;BAK1;ITGB1;CLDN1;PRKAA1;PTEN;MTOR;CDKN1B;CREBBP;FOXO1;HDAC4;NOTCH1;CHEK1;AKT1S1;CDKN1A;NFKBIA	EIF4EBP1;DNMT3B;PDK1;MAPK8;NFKBIA;EGFR;HDAC4;FOXO1;CREBBP;ITGB1;RELA;CHEK2;PIAS1;BAK1;KIT;CHEK1;ATM;CDKN1B;MTOR;CASP3;RPTOR;CAV1;BAD		AKT1S1;CDKN1B;EGFR;CREBBP;ITGB1;CAV1;PRKAA1;NFKBIA;CHEK2;RELA;MTOR;PTEN;CHEK1;NOTCH1;FOXO1;BAD;PRKDC;RPTOR;PDK1;HDAC4;BAX;ATM;CDKN1A		CDKN1B;RELA;KIT;BAD;CREBBP;CASP3;PDK1;CHEK2;PIAS1;CAV1;MAPK8;ATM;CHEK1;FOXO1;RPTOR;EGFR;MTOR;EIF4EBP1;HDAC4;NFKBIA	JUN;ANXA1;MTOR;CDKN1A;RELA;PRKAA1;TP53;DNMT3B;EGFR;FOS;AKT1S1;ITGB1	HDAC4;RELA;PDGFRB;CHEK1;TP53;ATG7;PRKDC;FOXO1;PDK1;NFKBIA;KDM1A;CHEK2;YAP1;CREBBP;STAT1;EGFR;NOTCH1;LDHA;MYC;JUN;KIT;BRCA2;CASP3;RPTOR;MAPK8;ITGB1;DNMT3B;BAD;HK2;MTOR;FOS;ATR;CDKN1B;CDKN1A;ANXA1;PTGS2;PIAS1	FOS;CHEK1;RPTOR;TP53;CAV1;RELA;ATR	KDM1A;TP53;CASP3;SRC;CHEK2;KIT;STAT1;DNMT3B;BRCA2;LDHA;PDK1;RELA;MAPK8;BAD;ATG7;EIF4EBP1;JUN;PDGFRB;FOS;ANXA1;PTGS2;MYC	ATR;CHEK2;CLDN1;PDGFRB;BRCA2;CHEK1;HDAC4;NFKBIA;ITGB1;AKT1S1;KDM1A;TP53;CDKN1B;STAT1;PRKAA1;LDHA;PTEN;BAX;CASP3;MTOR;PRKDC;MYC;CREBBP;EIF4EBP1;JUN;FOS;PDK1;ATG7;NOTCH1;PTGS2;BAK1;MAPK8;BAD;DNMT3B;FOXO1;CDKN1A;ANXA1;RELA;KIT;SRC		CHEK1;STAT1;CHEK2;PTGS2;CASP3;LDHA;KIT;FOS;MAPK8;PDGFRB;JUN;ANXA1;EIF4EBP1;PDK1;BRCA2;ATG7;BAD;TP53;SRC;DNMT3B	BAX;EP300;CHEK1;HDAC4;PDGFRB;TP53;CHEK2;PRKAA1;CDKN1B;CREBBP;SRC;FOXO1;CAV1;CLDN1;AKT1S1;GATA3;RPTOR;DNMT3B;PTGS2;PDK1;KIT;CASP3;PRKDC;EIF4EBP1;MTOR;BAD;ATG7;TWIST1;JUN;NFKBIA;CDKN1A;ANXA1;FOS;MAPK8;ITGB1;STAT1;BRCA2;LDHA;NOTCH1	DNMT3B;ATM;FOXO1;PDGFRB;PRKAA1;HDAC4;EIF4EBP1;PDK1;ITGB1;ATG7;MYC;AKT1S1;PRKDC;CDKN1A;ANXA1;KDM1A;MTOR;CAV1;FOS;CREBBP;RPTOR;NOTCH1;MAPK8;RELA;SRC;BRCA2;CDKN1B;CHEK1;PTGS2;EGFR;STAT1;BAX;JUN;NFKBIA;BAD;LDHA;PTEN;TP53;CHEK2	ATG7;PIAS1;DNMT3B;BAD;PTGS2;RELA;ANXA1;KIT;HK2;LDHA;STAT1;MAPK8;CHEK2;CHEK1;ATR;JUN;FOS;PDGFRB;KDM1A;BRCA2;PDK1;RPTOR;TP53;MYC;CASP3	CDKN1A;BAX;GATA3;NOTCH1;HDAC4;EP300;NFKBIA;PRKDC;RPTOR;TWIST1;ITGB1;FOXO1;PRKAA1;CLDN1;BAD;CHEK2;AKT1S1;CAV1;CREBBP;CDKN1B;MTOR	MTOR;NOTCH1;CHEK2;FOXO1;HDAC4;ITGB1;EGFR;CREBBP;PRKDC;CDKN1B;CDKN1A;YAP1;NFKBIA	ITGB1;BAK1;DNMT3B	19		20	8	9	19
GO_CELLULAR_RESPONSE_TO_NITROGEN_COMPOUND	11.68	15.662	6.712	9.694	13.576	11.923	11.198	9.867	22.492	15.135	24.252		12.23	20.714	23.297	14.051	9.989	10.005	3.277	CASP7;SMARCC1;PIK3CA;TP53;ATG7;KDM1A;SRC;STAT1;RELA;STAT5A;EIF4EBP1;PTGS2;ITGA4;KAT2B		STAT6;EGFR;PDGFRA;RPS6KB1;CAV1;SOCS1;VIM;DNMT1;PRKAA1;BCL2L1;RPTOR;STAT3;MTOR;TP53;IGF1R;STAT5A;RELA	CAV1;RELA;TP53;RPTOR	EGFR;PDGFRA;RPS6KB1;RPTOR;STAT3;BCL2L1;DNMT1;CAV1	PDGFRA;SHC1;VIM;PRKAA1;TSC2;PTEN;PRKDC;RPS6KB1;MTOR;FOXO1;CTNNB1;KLF4;STAT6	TSC2;KLF4;EIF4EBP1;STAT3;VIM;PIK3CA;MTOR;CASP3;EGFR;DNMT1;EZH2;RPTOR;RELA;RPS6KB1;STAT6;CAV1;FOXO1		FOXO1;VIM;RELA;STAT6;PRKDC;RPTOR;MTOR;EGFR;CAV1;TSC2;RPS6KB1;PTEN;CTNNB1;KLF4;PRKAA1		RPS6KB1;CASP3;FOXO1;RPTOR;STAT6;CAV1;TSC2;EGFR;DNMT1;MTOR;PIK3CA;EIF4EBP1;STAT3;RELA	SOCS1;VIM;STAT5A;MTOR;RELA;PRKAA1;TP53;STAT6;EGFR;IGF1R	VIM;SMARCC1;RELA;KAT2B;STAT5A;TP53;ATG7;PRKDC;FOXO1;KDM1A;STAT1;EGFR;STAT6;ITGA4;ZEB1;KLF4;CASP7;STAT3;CASP3;RPTOR;PIK3CA;DNMT1;RPS6KB1;CTNNB1;PDGFRA;TSC2;MTOR;PTGS2	TP53;CAV1;RPTOR;RELA	STAT5A;KDM1A;SMARCC1;TP53;PTGS2;RPS6KB1;CASP3;PIK3CA;ITGA4;CASP7;RELA;KAT2B;ATG7;EIF4EBP1;STAT3;SRC;ALK;STAT1	STAT5A;KDM1A;TP53;STAT1;PRKAA1;PDGFRA;PTEN;CTNNB1;CASP3;VIM;MTOR;PRKDC;ALK;CASP7;TSC2;EIF4EBP1;RPS6KB1;STAT3;ATG7;STAT6;KAT2B;PTGS2;SHC1;PIK3CA;KLF4;ITGA4;FOXO1;RELA;SMARCC1;SRC		STAT1;EIF4EBP1;ATG7;PIK3CA;STAT6;SMARCC1;TP53;SRC;RPS6KB1;CASP7;CASP3;DNMT1;KAT2B;PTGS2;STAT5A	RPS6KB1;STAT6;TP53;ZEB1;PRKAA1;DNMT1;KAT2B;SRC;TSC2;PIK3CA;FOXO1;CAV1;RPTOR;PTGS2;CASP3;PRKDC;STAT5A;EIF4EBP1;MTOR;SMARCC1;ATG7;VIM;CTNNB1;STAT1;KLF4;PDGFRA;CASP7	CTNNB1;FOXO1;PRKAA1;ITGA4;EIF4EBP1;TSC2;ATG7;PRKDC;KDM1A;RPS6KB1;MTOR;CAV1;KAT2B;SMARCC1;RPTOR;PIK3CA;STAT6;RELA;SRC;CASP7;VIM;PTGS2;EGFR;STAT1;STAT5A;KLF4;PTEN;TP53	ATG7;STAT6;RPTOR;PIK3CA;STAT1;KDM1A;SMARCC1;STAT5A;KAT2B;TP53;RPS6KB1;PTGS2;CASP3;RELA;DNMT1;STAT3;ITGA4;CASP7	CTNNB1;PDGFRA;ZEB1;PRKDC;RPTOR;TSC2;RPS6KB1;FOXO1;CAV1;PRKAA1;STAT6;MTOR;VIM;KLF4	MTOR;PDGFRA;FOXO1;STAT6;PRKDC;KLF4;VIM;CTNNB1;RPS6KB1;TSC2;EGFR;ZEB1	TSC2;EZH2;KLF4;VIM	14		17	4	8	13
GO_CELLULAR_RESPONSE_TO_CHEMICAL_STRESS	13.85	15.489	5.905	6.626	13.801	13.101	10.662	10.693	21.463	15.457	22.381		14.684	21.012	23.529	14.544	8.5	7.513	3.016	PDK1;TP53;ANXA1;FOS;ATG7;JUN;PDGFRB;BAD;RELA;MAPK8;SRC;DNMT3B;PTGS2		BAD;EGFR;PDGFRA;CAV1;FOS;MET;PRKAA1;ATM;DNMT3B;TP53;ANXA1;JUN;STAT6;RELA	RELA;CAV1;FOS;BAD;CHUK;TP53	EGFR;PDGFRA;ATM;MET;BAD;CAV1	PDGFRA;MET;PRKAA1;MAP1LC3A;FOXO1;CTNNB1;KLF4;STAT6	KLF4;DNMT3B;PDK1;FOXO1;ATM;MAPK8;CASP3;EGFR;EZH2;RELA;MET;STAT6;CAV1;BAD		FOXO1;MAP1LC3A;BAD;RELA;STAT6;CAV1;EGFR;PDK1;ATM;CTNNB1;KLF4;MET;PRKAA1		CASP3;PDK1;FOXO1;STAT6;CAV1;MET;EGFR;MAPK8;RELA;BAD;ATM	JUN;ANXA1;RELA;PRKAA1;TP53;DNMT3B;STAT6;EGFR;FOS	RELA;MAP1LC3A;PDGFRB;TP53;ATG7;FOXO1;PDK1;CHUK;EGFR;STAT6;KLF4;JUN;CASP3;MAPK8;DNMT3B;CTNNB1;PDGFRA;BAD;MET;FOS;ANXA1;PTGS2	FOS;TP53;CAV1;CHUK;RELA	PTGS2;PDGFRB;TP53;FOS;ANXA1;CHUK;CASP3;PDK1;RELA;MAPK8;BAD;ATG7;SRC;JUN;DNMT3B	PDGFRB;TP53;CHUK;PRKAA1;PDGFRA;CTNNB1;CASP3;MAP1LC3A;JUN;FOS;PDK1;ATG7;STAT6;PTGS2;MAPK8;BAD;DNMT3B;KLF4;MET;FOXO1;ANXA1;RELA;SRC		ANXA1;ATG7;BAD;STAT6;TP53;SRC;MAPK8;FOS;PDK1;DNMT3B;PTGS2;PDGFRB;CASP3;JUN	MAP1LC3A;STAT6;PDGFRB;TP53;PRKAA1;SRC;FOXO1;CAV1;DNMT3B;PTGS2;PDK1;CASP3;BAD;ATG7;JUN;ANXA1;FOS;MAPK8;CTNNB1;KLF4;MET;PDGFRA	DNMT3B;ATM;CTNNB1;FOXO1;PDGFRB;PRKAA1;MAP1LC3A;PDK1;ATG7;ANXA1;MET;CAV1;FOS;STAT6;MAPK8;RELA;SRC;PTGS2;EGFR;JUN;BAD;KLF4;TP53	ATG7;STAT6;PDK1;PDGFRB;FOS;DNMT3B;MAPK8;CHUK;BAD;TP53;PTGS2;CASP3;RELA;ANXA1;JUN	CTNNB1;PDGFRA;MAP1LC3A;CAV1;FOXO1;PRKAA1;MET;BAD;STAT6;KLF4	PDGFRA;FOXO1;STAT6;KLF4;CTNNB1;MAP1LC3A;EGFR;MET	EZH2;KLF4;DNMT3B	13		14	6	6	8
GO_REGULATION_OF_PHOSPHORUS_METABOLIC_PROCESS	7.734	14.833	9.027	20.38	23.538	25.037	21.409	6.313	26.072	13.621	34.076		11.703	35.524	30.852	13.086	25.874	14.129	2.917	PDK1;STAT2;CCNC;RB1;DEPTOR;PIK3CA;TP53;JUN;PDGFRB;BAD;FGFR1;SRC;PTGS2;MYC;KAT2B		BAD;ERBB2;KIT;HDAC3;MTOR;ERBB3;TP53;IGF1R;PDGFRA;AKT1S1;CAV1;MET;SOCS1;PRKAA1;DEPTOR;CDKN1A;RPTOR;STAT3;JUN;EGFR;ATM;SQSTM1	CAV1;SQSTM1;BAD;ERBB2;RPTOR;TP53	EGFR;PDGFRA;ATM;MET;BAD;RPTOR;STAT3;ERBB3;DEPTOR;ERBB2;KIT;CAV1;HDAC3	BAX;IDH1;MET;TSC2;ERBB2;CHEK2;PRKDC;BAK1;SIRT6;PDGFRA;PRKAA1;PTEN;MTOR;MAP2K6;CDKN1B;LRP6;BRAF;RET;ITGA5;FOXO1;HDAC4;NOTCH1;SHC1;AKT1S1;CTNNB1;CDKN1A;KLF4;MAP2K1	TSC2;PDK1;RB1;DEPTOR;MAP2K6;IKBKB;EGFR;HDAC4;MET;SIRT6;FOXO1;PIK3CA;LRP6;KDR;CHEK2;YWHAZ;BAK1;KIT;ERBB2;ILK;EZH2;KLF4;STAT3;ATM;CDKN1B;MTOR;CASP3;RPTOR;ERBB3;CAV1;HDAC3;BAD		ITGA5;SIRT6;CDKN1B;AKT1S1;EGFR;TSC2;CAV1;PRKAA1;CHEK2;MAP2K6;MTOR;RET;PTEN;NOTCH1;ILK;FOXO1;BAD;PRKDC;ERBB2;RPTOR;PDK1;KLF4;MET;LRP6;BRAF;HDAC4;BAX;MAP2K1;ATM;CDKN1A;IDH1;CTNNB1		CDKN1B;STAT3;KIT;BAD;LRP6;CASP3;ERBB3;PDK1;CHEK2;TSC2;HDAC3;RB1;ERBB2;CAV1;MET;ILK;KDR;ATM;FOXO1;MAP2K6;RPTOR;EGFR;MTOR;PIK3CA;DEPTOR;IKBKB;HDAC4;SIRT6	JUN;SOCS1;AKT1S1;MTOR;CDKN1A;PRKAA1;TP53;EGFR;IGF1R;SQSTM1	HDAC4;PDGFRB;MAP2K1;KAT2B;LRP6;TP53;PRKDC;FOXO1;PDK1;ITGA5;CHEK2;EGFR;NOTCH1;RB1;KLF4;IKBKB;BRAF;KDR;MYC;JUN;KIT;STAT3;CASP3;CCNC;RPTOR;PIK3CA;RET;SQSTM1;HDAC3;CTNNB1;PDGFRA;FGFR1;MAP2K6;BAD;MET;TSC2;STAT2;MTOR;CDKN1B;CDKN1A;PTGS2;DEPTOR	ERBB2;RPTOR;TP53;CAV1;SQSTM1	TP53;CASP3;HDAC3;STAT3;SRC;CHEK2;KIT;FGFR1;STAT2;PDK1;BAD;CCNC;JUN;ALK;PDGFRB;KDR;KAT2B;RB1;IKBKB;PTGS2;PIK3CA;MYC;DEPTOR	CHEK2;PDGFRB;HDAC4;BRAF;RET;AKT1S1;TP53;CDKN1B;HDAC3;PRKAA1;PDGFRA;PTEN;CTNNB1;CASP3;BAX;MTOR;STAT2;SIRT6;PRKDC;MAP2K6;ERBB2;MYC;FGFR1;ALK;ITGA5;TSC2;JUN;KDR;STAT3;PDK1;LRP6;IKBKB;DEPTOR;IDH1;KAT2B;PTGS2;SHC1;NOTCH1;PIK3CA;BAK1;BAD;RB1;KLF4;MAP2K1;MET;FOXO1;CDKN1A;CCNC;KIT;SRC		IKBKB;DEPTOR;KAT2B;CHEK2;PTGS2;CCNC;CASP3;STAT2;KIT;FGFR1;PDGFRB;JUN;PDK1;RET;PIK3CA;BAD;TP53;SRC;RB1;KDR	BAX;EP300;LRP6;HDAC4;RB1;CCNC;KDR;PDGFRB;TP53;CHEK2;PRKAA1;DEPTOR;CDKN1B;KAT2B;AR;SRC;TSC2;PIK3CA;MAP2K1;CAV1;SQSTM1;FOXO1;STAT2;AKT1S1;ITGA5;SIRT6;MET;RPTOR;PTGS2;PDK1;TNFSF11;KIT;CASP3;PRKDC;MTOR;BAD;ERBB3;TWIST1;JUN;MAP2K6;CDKN1A;BRAF;CTNNB1;IDH1;KLF4;RET;FGFR1;PDGFRA;ERBB2;IKBKB;NOTCH1	ERBB2;ATM;CTNNB1;ILK;FOXO1;PDGFRB;PRKAA1;HDAC4;SIRT6;BRAF;TSC2;PDK1;MYC;FGFR1;PRKDC;CDKN1A;MET;ITGA5;PTEN;MTOR;DEPTOR;CAV1;KAT2B;STAT2;RPTOR;PIK3CA;NOTCH1;LRP6;IDH1;SRC;MAP2K1;CCNC;MAP2K6;RET;CDKN1B;PTGS2;EGFR;BAX;CHEK2;JUN;BAD;KLF4;AKT1S1;TP53;RB1	PIK3CA;KDR;BAD;RB1;PTGS2;SQSTM1;KIT;IKBKB;CHEK2;STAT3;DEPTOR;JUN;PDGFRB;CCNC;PDK1;RPTOR;FGFR1;KAT2B;TP53;MYC;HDAC3;CASP3;RET;STAT2	MAP2K1;BRAF;SQSTM1;ITGA5;CTNNB1;TSC2;CDKN1A;NOTCH1;MET;BAX;HDAC4;EP300;PDGFRA;PRKDC;RPTOR;LRP6;TWIST1;ERBB3;RET;FOXO1;TNFSF11;PRKAA1;SIRT6;BAD;CHEK2;IDH1;KLF4;AKT1S1;MAP2K6;AR;CAV1;ERBB2;CDKN1B;MTOR	MTOR;NOTCH1;PDGFRA;HDAC4;RET;CTNNB1;EGFR;CDKN1A;MAP2K6;MAP2K1;TSC2;MET;KLF4;CHEK2;FOXO1;PRKDC;BRAF;CDKN1B;LRP6;ITGA5	EZH2;TSC2;KLF4;BAK1;YWHAZ	15		22	6	13	28
GO_POSITIVE_REGULATION_OF_NUCLEOBASE_CONTAINING_COMPOUND_METABOLIC_PROCESS	12.587	14.758	7.97	17.914	19.687	19.989	21.37	7.375	36.755	16.657	35.041		12.64	37.737	33.08	20.434	26.746	17.944	1.478	STAT2;SMARCC1;BRCA2;PHF2;SRC;KAT2B;CCNC;RB1;TP53;STAT1;STAT5A;RELA;SMARCA4;FOS;FOXK2;JUN;KDM1A;PDGFRB;MED1;MYC		ERBB2;HDAC3;FOS;MTOR;TP53;STAT6;NCOA1;MET;PRKAA1;GATA3;SMAD2;RPTOR;STAT3;JUN;CHEK1;PHF8;EGFR;ATM;SQSTM1;STAT4;STAT5A;RELA	CHEK1;RELA;ATR;FOS;SQSTM1;ERBB2;RPTOR;CHUK;TP53	EGFR;GATA3;SMAD2;ATM;CHEK1;MET;PHF8;NCOA1;RPTOR;STAT3;ERBB2;HDAC3	BAX;MET;ATR;ERBB2;CHEK2;PRKDC;ASH2L;SIRT6;NCOA1;SMAD2;PRKAA1;MTOR;LRP6;ESR1;CREBBP;RET;FOXO1;HDAC4;NOTCH1;NFKBIA;STAT6;SHC1;CTNNB1;KLF4;MAP2K1;CHEK1	SMAD2;NCOA1;CTBP2;NFKBIA;IKBKB;EGFR;HDAC4;MET;SIRT6;FOXO1;PHF8;MED1;LRP6;CREBBP;RELA;CHEK2;PIAS1;ERBB2;STAT6;ILK;KLF4;CHEK1;STAT3;NCOA3;ATM;MTOR;RPTOR;RB1;HDAC3		SIRT6;STAT6;EGFR;CREBBP;PGR;NCOA1;PRKAA1;NFKBIA;CHEK2;RELA;MTOR;RET;CHEK1;NOTCH1;ILK;FOXO1;PRKDC;ERBB2;RPTOR;KLF4;MET;LRP6;SMAD2;HDAC4;BAX;MAP2K1;ATM;CTNNB1		CTBP2;STAT3;RELA;MED1;CREBBP;LRP6;CHEK2;HDAC3;RB1;NFKBIA;PHF8;ERBB2;STAT6;PIAS1;MET;NCOA3;ILK;ATM;CHEK1;FOXO1;RPTOR;EGFR;MTOR;IKBKB;HDAC4;NCOA1;SIRT6;SMAD2	JUN;STAT5A;MTOR;STAT4;RELA;PRKAA1;TP53;STAT6;EGFR;FOS;SQSTM1	HDAC4;SMARCC1;RELA;PDGFRB;MAP2K1;CHEK1;KAT2B;MED23;STAT5A;LRP6;TP53;PRKDC;FOXO1;CHUK;NFKBIA;KDM1A;CHEK2;YAP1;CREBBP;STAT1;EGFR;NOTCH1;SMARCA4;STAT6;ZEB1;RB1;KLF4;IKBKB;MYC;JUN;KDM5A;BRCA2;STAT3;CCNC;RPTOR;RET;ESR1;SQSTM1;NCOA3;HDAC3;CTNNB1;NCOA1;PHF2;MET;STAT2;MTOR;FOS;ATR;ASH2L;FOXK2;PIAS1	FOS;CHEK1;ERBB2;RPTOR;TP53;CHUK;RELA;ATR;SQSTM1	STAT5A;KDM1A;TP53;PHF2;HDAC3;STAT3;SRC;CHEK2;SMARCE1;NCOA3;STAT1;STAT4;BRCA2;STAT2;RELA;CCNC;JUN;SMARCC1;PDGFRB;FOS;FOXK2;KAT2B;RB1;IKBKB;CHUK;MYC	ATR;CHEK2;BRCA2;PDGFRB;NCOA3;CHEK1;HDAC4;NFKBIA;STAT5A;RET;KDM1A;TP53;CHUK;STAT1;PRKAA1;HDAC3;CTNNB1;BAX;NCOA1;MTOR;STAT2;SIRT6;PRKDC;FOXK2;ERBB2;MYC;CREBBP;SMARCE1;JUN;STAT3;FOS;STAT4;LRP6;ASH2L;STAT6;IKBKB;KAT2B;NOTCH1;SHC1;SMAD2;ESR1;PHF2;RB1;KLF4;MAP2K1;MET;FOXO1;RELA;CCNC;SMARCC1;SRC		CHEK1;IKBKB;STAT1;KAT2B;CHEK2;CCNC;STAT5A;STAT2;STAT6;FOXK2;FOS;PDGFRB;JUN;STAT4;BRCA2;RET;SMARCC1;TP53;SRC;RB1;PHF2	BAX;EP300;CHEK1;HDAC4;RB1;LRP6;STAT6;CCNC;PDGFRB;TP53;CHEK2;ZEB1;PRKAA1;FOXK2;ESR1;CREBBP;KAT2B;AR;SRC;SQSTM1;MAP2K1;ASH2L;HDAC1;FOXO1;KDM5A;STAT2;MED1;GATA3;MET;RPTOR;STAT4;TNFSF11;PRKDC;BRCA2;STAT5A;PHF2;SMARCC2;MTOR;SMARCC1;TWIST1;JUN;NFKBIA;NCOA1;FOS;CTNNB1;SMAD2;KLF4;STAT1;RET;SIRT6;ERBB2;IKBKB;NOTCH1	ERBB2;ATM;CTNNB1;PHF2;ILK;FOXO1;NCOA1;SMARCA4;PDGFRB;PRKAA1;HDAC4;SIRT6;MYC;PRKDC;MET;KDM1A;MTOR;FOS;MED1;KAT2B;CREBBP;STAT2;SMARCC1;RPTOR;PGR;NOTCH1;LRP6;STAT6;RELA;MAP2K1;SRC;CCNC;BRCA2;RET;CHEK1;EGFR;FOXK2;SMAD2;STAT1;BAX;CHEK2;JUN;NFKBIA;STAT5A;KLF4;TP53;RB1	PIAS1;RB1;RELA;SQSTM1;FOXK2;IKBKB;STAT1;CHEK2;CHEK1;ATR;STAT3;JUN;STAT6;NCOA3;FOS;PDGFRB;PHF2;KDM1A;SMARCC1;CHUK;CCNC;STAT5A;BRCA2;MED23;RPTOR;KAT2B;TP53;MYC;HDAC3;RET;STAT2	ESR1;MAP2K1;SMARCC2;SMAD2;NCOA1;SQSTM1;CTNNB1;KDM5A;NOTCH1;GATA3;MET;BAX;HDAC4;MED1;ASH2L;EP300;NFKBIA;PRKDC;RPTOR;LRP6;TWIST1;RET;FOXO1;TNFSF11;PRKAA1;SIRT6;CHEK2;KLF4;ZEB1;HDAC1;AR;CREBBP;ERBB2;STAT6;MTOR	MTOR;NOTCH1;ESR1;HDAC4;CREBBP;RET;CTNNB1;EGFR;NFKBIA;ASH2L;MAP2K1;MET;KDM5A;KLF4;ZEB1;CHEK2;NCOA1;FOXO1;STAT6;SMARCA4;PRKDC;LRP6;YAP1	MED1;KLF4;SMAD2	20		22	9	12	26
GO_NEGATIVE_REGULATION_OF_SIGNALING	4.63	14.514	9.027	11.182	12.14	14.263	10.543	6.14	11.323	4.476	14.281		2.39	15.363	17.75	3.352	15.229	10.011	3.261	RB1;DEPTOR;SMARCA4;TP53;KDM1A;STAT1;SRC;RELA;PTGS2;MYC		RPS6KB1;ERBB2;HDAC3;MTOR;ERBB3;TP53;ITGB1;IGF1R;AKT1S1;CAV1;MET;SOCS1;PRKAA1;GATA3;SMAD2;DEPTOR;BCL2L1;EGFR;ATM;RELA	CAV1;RELA;TP53;ERBB2	EGFR;GATA3;SMAD2;ATM;MET;RPS6KB1;ERBB3;BCL2L1;DEPTOR;ERBB2;CAV1;HDAC3	ESR1;BAX;MET;SMAD2;PRKAA1;TSC2;ERBB2;PTEN;RPS6KB1;MTOR;FOXO1;AKT1S1;ITGB1;KLF4;NOTCH1;LRP6;CTNNB1;NFKBIA	TSC2;SMAD2;RB1;DEPTOR;NFKBIA;EGFR;MET;FOXO1;LRP6;ITGB1;RELA;RPS6KB1;ERBB2;EZH2;KLF4;ATM;MTOR;ERBB3;CAV1;HDAC3		AKT1S1;EGFR;TSC2;ITGB1;PRKAA1;CAV1;NFKBIA;RELA;MTOR;PTEN;NOTCH1;FOXO1;ERBB2;KLF4;MET;LRP6;SMAD2;BAX;ATM;RPS6KB1;CTNNB1		RPS6KB1;ERBB3;FOXO1;ERBB2;CAV1;MET;TSC2;EGFR;MTOR;DEPTOR;HDAC3;RB1;SMAD2;RELA;NFKBIA;ATM;LRP6	SOCS1;MTOR;RELA;PRKAA1;TP53;EGFR;IGF1R;AKT1S1;ITGB1	RELA;LRP6;TP53;FOXO1;NFKBIA;KDM1A;YAP1;STAT1;EGFR;SMARCA4;NOTCH1;RB1;KLF4;MYC;ESR1;ITGB1;RPS6KB1;HDAC3;CTNNB1;MET;TSC2;MTOR;PTGS2;DEPTOR	TP53;ERBB2;CAV1;RELA	PTGS2;KDM1A;TP53;RPS6KB1;HDAC3;RELA;MYC;SRC;STAT1;DEPTOR;RB1	NFKBIA;ITGB1;AKT1S1;KDM1A;TP53;STAT1;PRKAA1;HDAC3;PTEN;CTNNB1;BAX;MTOR;ERBB2;MYC;TSC2;RPS6KB1;LRP6;DEPTOR;NOTCH1;PTGS2;SMAD2;ESR1;RB1;KLF4;MET;FOXO1;RELA;SRC		STAT1;TP53;SRC;RB1;RPS6KB1;DEPTOR;PTGS2	RPS6KB1;BAX;LRP6;RB1;TP53;PRKAA1;DEPTOR;ESR1;AR;SRC;TSC2;FOXO1;CAV1;HDAC1;AKT1S1;GATA3;PTGS2;MTOR;ERBB3;TWIST1;NFKBIA;CTNNB1;SMAD2;ITGB1;KLF4;STAT1;MET;ERBB2;NOTCH1	ERBB2;ATM;CTNNB1;FOXO1;SMARCA4;PRKAA1;TSC2;ITGB1;MYC;AKT1S1;MET;KDM1A;RPS6KB1;MTOR;DEPTOR;CAV1;NOTCH1;LRP6;RELA;SRC;PTGS2;EGFR;SMAD2;STAT1;BAX;NFKBIA;KLF4;PTEN;TP53;RB1	STAT1;KDM1A;MYC;TP53;RB1;RPS6KB1;PTGS2;HDAC3;RELA;DEPTOR	ESR1;SMAD2;CTNNB1;TSC2;NOTCH1;GATA3;MET;BAX;NFKBIA;LRP6;TWIST1;ERBB3;ITGB1;FOXO1;PRKAA1;KLF4;AKT1S1;HDAC1;AR;RPS6KB1;CAV1;ERBB2;MTOR	MTOR;NOTCH1;ESR1;FOXO1;SMARCA4;ITGB1;KLF4;LRP6;CTNNB1;RPS6KB1;TSC2;MET;EGFR;YAP1;NFKBIA	ITGB1;SMAD2;EZH2;TSC2;KLF4	10		20	4	12	18
GO_RESPONSE_TO_CYTOKINE	11.044	14.452	4.281	5.416	14.325	6.99	11.494	10.335	20.873	13.653	18.94		10.235	21.222	16.298	14.517	12.041	6.614	3.475	STAT2;PIK3CA;SMARCA4;TP53;ANXA1;FOS;STAT1;BAD;ITGA4;MAPK8;STAT5A;MED1;SRC;RELA;PTGS2;MYC		BAD;KIT;FOS;ANXA1;TP53;ITGB1;STAT6;CAV1;SOCS1;GATA3;CDKN1A;STAT3;BCL2L1;VIM;GLDC;SQSTM1;STAT4;STAT5A;RELA	RELA;CAV1;FOS;SQSTM1;BAD;CHUK;TP53	GATA3;BAD;GLDC;STAT3;BCL2L1;KIT;CAV1	CLDN1;SHC1;VIM;JAK1;FOXO1;CDKN1A;ITGB1;KLF4;HDAC4;STAT6;NFKBIA	VIM;CTBP2;MAPK8;NFKBIA;IKBKB;HDAC4;FOXO1;MED1;PIK3CA;ITGB1;RELA;YWHAZ;PIAS1;KIT;STAT6;ILK;KLF4;STAT3;CASP3;CAV1;BAD		ILK;FOXO1;HDAC4;ITGB1;BAD;VIM;RELA;STAT6;CAV1;CDKN1A;KLF4;JAK1;NFKBIA		CASP3;FOXO1;KIT;STAT6;PIAS1;CAV1;MAPK8;PIK3CA;ILK;CTBP2;IKBKB;STAT3;RELA;HDAC4;MED1;BAD;NFKBIA	SOCS1;ANXA1;VIM;STAT5A;STAT4;CDKN1A;RELA;STAT6;TP53;FOS;SQSTM1;ITGB1	HDAC4;VIM;RELA;STAT5A;TP53;FOXO1;CHUK;NFKBIA;YAP1;STAT1;SMARCA4;STAT6;ITGA4;ZEB1;KLF4;IKBKB;MYC;KIT;STAT3;CASP3;PIK3CA;SQSTM1;MAPK8;ITGB1;BAD;STAT2;HK2;FOS;CDKN1A;ANXA1;PTGS2;PIAS1	FOS;TP53;CAV1;CHUK;RELA;SQSTM1	STAT5A;TP53;CASP3;STAT3;SRC;KIT;STAT1;STAT4;STAT2;ITGA4;RELA;MAPK8;BAD;FOS;ANXA1;IKBKB;PTGS2;CHUK;PIK3CA;MYC	CLDN1;HDAC4;NFKBIA;ITGB1;STAT5A;JAK1;TP53;STAT1;CHUK;CASP3;VIM;STAT2;MYC;STAT3;FOS;STAT4;STAT6;IKBKB;PTGS2;SHC1;PIK3CA;MAPK8;BAD;KLF4;ITGA4;FOXO1;CDKN1A;ANXA1;RELA;KIT;SRC		IKBKB;STAT2;STAT1;ANXA1;PIK3CA;STAT4;BAD;STAT6;TP53;SRC;KIT;FOS;PTGS2;STAT5A;MAPK8;CASP3	HDAC4;STAT6;TP53;ZEB1;GLDC;SRC;SQSTM1;PIK3CA;FOXO1;CAV1;CLDN1;STAT2;MED1;GATA3;STAT4;PTGS2;TNFSF11;KIT;CASP3;JAK1;STAT5A;BAD;TWIST1;VIM;CDKN1A;NFKBIA;ANXA1;FOS;MAPK8;ITGB1;STAT1;KLF4;IKBKB	ILK;FOXO1;SMARCA4;HDAC4;ITGA4;JAK1;ITGB1;MYC;CDKN1A;ANXA1;CAV1;FOS;MED1;STAT2;PIK3CA;STAT6;MAPK8;RELA;SRC;VIM;PTGS2;STAT1;NFKBIA;BAD;STAT5A;KLF4;TP53	PIK3CA;PIAS1;BAD;PTGS2;RELA;ANXA1;SQSTM1;ITGA4;KIT;HK2;IKBKB;STAT1;MAPK8;STAT3;STAT6;FOS;CHUK;STAT5A;TP53;MYC;CASP3;STAT2	SQSTM1;JAK1;GLDC;CDKN1A;GATA3;HDAC4;MED1;NFKBIA;TWIST1;ITGB1;FOXO1;TNFSF11;CLDN1;BAD;VIM;KLF4;ZEB1;CAV1;STAT6	FOXO1;HDAC4;ITGB1;SMARCA4;STAT6;KLF4;VIM;CDKN1A;YAP1;ZEB1;NFKBIA	ITGB1;MED1;KLF4;VIM;YWHAZ	16		19	7	7	11
GO_REGULATION_OF_RESPONSE_TO_STRESS	6.096	14.218	8.876	15.281	14.962	16.29	13.477	6.025	18.517	8.265	22.85		4.812	20.85	20.374	10.053	18.365	8.726	2.47	RB1;TP53;ANXA1;KDM1A;ATG7;STAT1;BAD;MED1;SRC;RELA;PTGS2;MYC		BAD;HDAC3;MTOR;ANXA1;TP53;ITGB1;IGF1R;PDGFRA;AKT1S1;CAV1;MET;SOCS1;GATA3;RPTOR;STAT3;CHEK1;BCL2L1;EGFR;ATM;RELA	CHEK1;RELA;ATR;CAV1;BAD;RPTOR;CHUK;TP53	EGFR;PDGFRA;GATA3;ATM;CHEK1;BAD;MET;RPTOR;STAT3;BCL2L1;CAV1;HDAC3	BAX;MET;ATR;CHEK2;PRKDC;BAK1;ITGB1;SIRT6;CLDN1;PDGFRA;PTEN;MTOR;ESR1;CREBBP;FOXO1;NFKBIA;JAK1;AKT1S1;CTNNB1;KLF4;MAP2K1;CHEK1	NFKBIA;IKBKB;EGFR;MET;SIRT6;FOXO1;MED1;CREBBP;ITGB1;RELA;CHEK2;PIAS1;BAK1;KLF4;CHEK1;STAT3;ATM;MTOR;RPTOR;RB1;CAV1;HDAC3;BAD		SIRT6;AKT1S1;EGFR;CREBBP;ITGB1;CAV1;NFKBIA;CHEK2;RELA;MTOR;PTEN;CHEK1;JAK1;FOXO1;BAD;PRKDC;RPTOR;KLF4;MET;BAX;MAP2K1;ATM;CTNNB1		STAT3;RELA;BAD;MED1;CREBBP;CHEK2;HDAC3;RB1;NFKBIA;PIAS1;CAV1;MET;ATM;CHEK1;FOXO1;RPTOR;EGFR;MTOR;IKBKB;SIRT6	SOCS1;ANXA1;MTOR;RELA;TP53;EGFR;IGF1R;AKT1S1;ITGB1	RELA;MAP2K1;CHEK1;TP53;ATG7;PRKDC;FOXO1;CHUK;NFKBIA;KDM1A;CHEK2;CREBBP;STAT1;EGFR;RB1;KLF4;IKBKB;MYC;STAT3;RPTOR;ESR1;ITGB1;HDAC3;CTNNB1;PDGFRA;BAD;MET;MTOR;ATR;ANXA1;PTGS2;PIAS1	CHEK1;RPTOR;TP53;CAV1;CHUK;RELA;ATR	PTGS2;KDM1A;TP53;ANXA1;CHUK;HDAC3;RELA;BAD;ATG7;MYC;STAT3;SRC;STAT1;CHEK2;RB1;IKBKB	ATR;CHEK2;CLDN1;CHEK1;NFKBIA;ITGB1;AKT1S1;KDM1A;JAK1;TP53;STAT1;CHUK;HDAC3;PDGFRA;PTEN;CTNNB1;BAX;MTOR;SIRT6;PRKDC;MYC;CREBBP;STAT3;ATG7;IKBKB;PTGS2;BAK1;ESR1;BAD;RB1;KLF4;MAP2K1;MET;FOXO1;ANXA1;RELA;SRC		CHEK1;IKBKB;STAT1;ANXA1;ATG7;BAD;TP53;SRC;RB1;CHEK2;PTGS2	BAX;EP300;CHEK1;RB1;TP53;CHEK2;ESR1;CREBBP;SRC;MAP2K1;FOXO1;CAV1;CLDN1;AKT1S1;MED1;GATA3;MET;RPTOR;PTGS2;TNFSF11;JAK1;PRKDC;MTOR;BAD;ATG7;TWIST1;NFKBIA;ANXA1;CTNNB1;KLF4;ITGB1;STAT1;SIRT6;PDGFRA;IKBKB	ATM;CTNNB1;FOXO1;SIRT6;JAK1;ITGB1;ATG7;MYC;AKT1S1;PRKDC;ANXA1;MET;KDM1A;MTOR;CAV1;MED1;CREBBP;RPTOR;RELA;MAP2K1;SRC;CHEK1;PTGS2;EGFR;STAT1;BAX;CHEK2;NFKBIA;BAD;KLF4;PTEN;TP53;RB1	ATG7;PIAS1;BAD;RB1;PTGS2;RELA;ANXA1;IKBKB;STAT1;CHEK2;CHEK1;ATR;STAT3;KDM1A;CHUK;RPTOR;TP53;MYC;HDAC3	ESR1;MAP2K1;CTNNB1;JAK1;GATA3;MET;BAX;MED1;EP300;NFKBIA;PDGFRA;PRKDC;RPTOR;TWIST1;ITGB1;FOXO1;TNFSF11;SIRT6;CLDN1;BAD;CHEK2;KLF4;AKT1S1;CAV1;CREBBP;MTOR	MTOR;PDGFRA;ESR1;CHEK2;FOXO1;ITGB1;MAP2K1;CREBBP;PRKDC;KLF4;CTNNB1;EGFR;MET;NFKBIA	MED1;KLF4;BAK1;ITGB1	12		20	8	12	22
GO_TRANSMEMBRANE_RECEPTOR_PROTEIN_TYROSINE_KINASE_SIGNALING_PATHWAY	4.907	13.944	7.883	11.812	10.97	11.652	12.162	6.914	13.873	9.986	21.318		9.573	19.03	15.574	8.196	11.997	8.583		SMARCC1;PIK3CA;EIF4EBP1;PDGFRB;STAT5A;FGFR1;SRC;RELA		STAT6;EGFR;PDGFRA;RPS6KB1;ERBB2;KIT;AKT1S1;MET;SOCS1;PRKAA1;GATA3;STAT3;ERBB3;IGF1R;STAT5A;RELA	RELA;ERBB2	EGFR;PDGFRA;GATA3;MET;RPS6KB1;STAT3;ERBB3;ERBB2;KIT	MET;PDGFRA;SHC1;BRAF;PRKAA1;TSC2;ERBB2;RET;ITGA5;PTEN;RPS6KB1;FOXO1;AKT1S1;CTNNB1;STAT6	TSC2;EIF4EBP1;STAT3;PIK3CA;KDR;CASP3;EGFR;KIT;RELA;ERBB2;MET;STAT6;ERBB3;RPS6KB1;FOXO1		FOXO1;ITGA5;RELA;STAT6;ERBB2;AKT1S1;EGFR;TSC2;RPS6KB1;RET;PTEN;CTNNB1;MET;PRKAA1;BRAF		RPS6KB1;CASP3;ERBB3;FOXO1;ERBB2;STAT6;MET;TSC2;EGFR;PIK3CA;EIF4EBP1;KDR;STAT3;RELA;KIT	SOCS1;STAT5A;RELA;STAT6;PRKAA1;EGFR;IGF1R;AKT1S1	SMARCC1;RELA;PDGFRB;STAT5A;FOXO1;ITGA5;EGFR;STAT6;BRAF;KDR;KIT;STAT3;CASP3;PIK3CA;RET;RPS6KB1;CTNNB1;PDGFRA;FGFR1;MET;TSC2	ERBB2;RELA	STAT5A;SMARCC1;PDGFRB;KDR;RPS6KB1;CASP3;PIK3CA;RELA;EIF4EBP1;STAT3;SRC;ALK;KIT;FGFR1	PDGFRB;BRAF;RET;AKT1S1;STAT5A;PRKAA1;PDGFRA;PTEN;CTNNB1;CASP3;ERBB2;FGFR1;ALK;ITGA5;TSC2;RPS6KB1;EIF4EBP1;STAT3;KDR;STAT6;SHC1;PIK3CA;MET;FOXO1;RELA;SMARCC1;KIT;SRC		FGFR1;EIF4EBP1;PIK3CA;SMARCC1;STAT6;SRC;KIT;RPS6KB1;RET;KDR;STAT5A;PDGFRB;CASP3	RPS6KB1;FGFR1;STAT6;PDGFRB;KDR;PRKAA1;AR;SRC;TSC2;PIK3CA;FOXO1;AKT1S1;ITGA5;GATA3;KIT;CASP3;STAT5A;EIF4EBP1;ERBB3;SMARCC1;BRAF;CTNNB1;RET;MET;PDGFRA;ERBB2	ERBB2;CTNNB1;FOXO1;PDGFRB;PRKAA1;EIF4EBP1;BRAF;TSC2;FGFR1;AKT1S1;MET;ITGA5;SMARCC1;PIK3CA;STAT6;RELA;SRC;RET;EGFR;STAT5A;RPS6KB1;PTEN	PIK3CA;STAT6;PDGFRB;FGFR1;SMARCC1;KDR;STAT5A;RPS6KB1;CASP3;RELA;STAT3;RET;KIT	CTNNB1;PDGFRA;ERBB3;AKT1S1;AR;BRAF;TSC2;RET;FOXO1;RPS6KB1;ERBB2;PRKAA1;GATA3;MET;STAT6;ITGA5	PDGFRA;FOXO1;STAT6;EGFR;RET;BRAF;CTNNB1;RPS6KB1;TSC2;ITGA5;MET		8		16	2	9	15
GO_NEGATIVE_REGULATION_OF_PROTEIN_MODIFICATION_PROCESS	5.424	13.724	3.772	11.633	15.823	15.457	13.188	10.331	19.021	7.637	19.604		5.062	19.708	19.634	10.24	14.433	8.134	3.426	RB1;DEPTOR;JUN;KDM1A;RELA;DNMT3B;MYC;KAT2B		DEPTOR;AKT1S1;CAV1;HDAC3;SOCS1;CDKN1A;DNMT1;PRKAA1;RPTOR;DNMT3B;MTOR;JUN;SQSTM1;IGF1R;RELA	RPTOR;CAV1;SQSTM1;RELA	CAV1;RPTOR;DEPTOR;DNMT1;HDAC3	BAX;PRKAA1;TSC2;PTEN;PRKDC;MTOR;BAK1;CDKN1B;FOXO1;KLF4;AKT1S1;LRP6;CTNNB1;CDKN1A	TSC2;KLF4;DNMT3B;RB1;DEPTOR;CDKN1B;LRP6;BAK1;MTOR;IKBKB;CASP3;DNMT1;RPTOR;RELA;ILK;CAV1;HDAC3;FOXO1		ILK;FOXO1;BAX;RELA;PRKDC;RPTOR;CAV1;CDKN1B;AKT1S1;MTOR;TSC2;CDKN1A;PTEN;CTNNB1;KLF4;LRP6;PRKAA1		CASP3;CDKN1B;FOXO1;RPTOR;CAV1;TSC2;MTOR;DNMT1;ILK;HDAC3;RB1;DEPTOR;RELA;IKBKB;LRP6	JUN;SOCS1;AKT1S1;MTOR;CDKN1A;RELA;PRKAA1;DNMT3B;IGF1R;SQSTM1	RELA;KAT2B;LRP6;PRKDC;FOXO1;KDM1A;RB1;KLF4;IKBKB;MYC;JUN;KDM5A;CASP3;RPTOR;SQSTM1;DNMT1;DNMT3B;HDAC3;CTNNB1;TSC2;MTOR;CDKN1B;CDKN1A;DEPTOR	SQSTM1;CAV1;RPTOR;RELA	KDM1A;CASP3;HDAC3;RELA;KAT2B;MYC;JUN;DEPTOR;RB1;DNMT3B;IKBKB	AKT1S1;CDKN1B;HDAC3;PRKAA1;PTEN;CTNNB1;CASP3;BAX;MTOR;PRKDC;MYC;TSC2;JUN;LRP6;IKBKB;DEPTOR;KAT2B;BAK1;RB1;DNMT3B;KLF4;FOXO1;CDKN1A;RELA;KDM1A		IKBKB;RB1;DEPTOR;DNMT1;DNMT3B;KAT2B;CASP3;JUN	BAX;LRP6;RB1;PRKAA1;DEPTOR;DNMT1;CDKN1B;KAT2B;TSC2;SQSTM1;FOXO1;CAV1;KDM5A;AKT1S1;RPTOR;DNMT3B;CASP3;PRKDC;MTOR;TWIST1;JUN;CDKN1A;CTNNB1;KLF4;IKBKB	DNMT3B;CTNNB1;ILK;FOXO1;PRKAA1;TSC2;MYC;AKT1S1;PRKDC;CDKN1A;KDM1A;MTOR;DEPTOR;CAV1;KAT2B;RPTOR;LRP6;RELA;CDKN1B;BAX;JUN;KLF4;PTEN;RB1	RPTOR;IKBKB;DNMT3B;KDM1A;KAT2B;MYC;RB1;HDAC3;CASP3;RELA;DNMT1;SQSTM1;DEPTOR;JUN	CTNNB1;PRKDC;RPTOR;LRP6;TWIST1;CDKN1B;AKT1S1;KDM5A;TSC2;FOXO1;CAV1;CDKN1A;PRKAA1;BAX;SQSTM1;MTOR;KLF4	MTOR;FOXO1;KDM5A;PRKDC;KLF4;CDKN1B;LRP6;CTNNB1;TSC2;CDKN1A	KLF4;BAK1;TSC2;DNMT3B	8		15	4	5	14
GO_NEGATIVE_REGULATION_OF_PROTEIN_METABOLIC_PROCESS	8.211	13.724	4.44	8.43	14.923	12.502	13.084	10.676	18.482	10.807	19.81		7.589	18.898	20.32	10.853	10.461	6.903	2.768	SMARCC1;RB1;DEPTOR;EIF4EBP1;TP53;JUN;KDM1A;RELA;SRC;DNMT3B;PTGS2;MYC;KAT2B		EGFR;DEPTOR;AKT1S1;CAV1;HDAC3;SOCS1;CDKN1A;DNMT1;PRKAA1;RPTOR;DNMT3B;STAT3;MTOR;TP53;JUN;SQSTM1;IGF1R;RELA	RELA;CAV1;SQSTM1;RPTOR;TP53	EGFR;RPTOR;STAT3;DEPTOR;DNMT1;CAV1;HDAC3	BAX;PRKAA1;TSC2;PTEN;PRKDC;MTOR;BAK1;CDKN1B;FOXO1;KLF4;AKT1S1;LRP6;CTNNB1;CDKN1A	TSC2;EIF4EBP1;DNMT3B;DEPTOR;IKBKB;EGFR;DNMT1;FOXO1;LRP6;RELA;BAK1;ILK;KLF4;STAT3;CDKN1B;MTOR;CASP3;RPTOR;RB1;CAV1;HDAC3		ILK;FOXO1;BAX;RELA;PRKDC;RPTOR;CAV1;CDKN1B;AKT1S1;EGFR;MTOR;TSC2;CDKN1A;PTEN;CTNNB1;KLF4;LRP6;PRKAA1		CASP3;CDKN1B;FOXO1;RPTOR;CAV1;TSC2;EGFR;DNMT1;MTOR;ILK;HDAC3;RB1;EIF4EBP1;STAT3;RELA;DEPTOR;IKBKB;LRP6	JUN;SOCS1;AKT1S1;MTOR;CDKN1A;RELA;PRKAA1;TP53;DNMT3B;EGFR;IGF1R;SQSTM1	SMARCC1;RELA;KAT2B;LRP6;TP53;PRKDC;FOXO1;KDM1A;EGFR;RB1;KLF4;IKBKB;MYC;JUN;KDM5A;STAT3;CASP3;RPTOR;SQSTM1;DNMT1;DNMT3B;HDAC3;CTNNB1;TSC2;MTOR;CDKN1B;CDKN1A;PTGS2;DEPTOR	RPTOR;TP53;CAV1;RELA;SQSTM1	SMARCC1;KDM1A;PTGS2;TP53;CASP3;HDAC3;RELA;KAT2B;EIF4EBP1;MYC;STAT3;SRC;JUN;DEPTOR;RB1;DNMT3B;IKBKB	AKT1S1;KDM1A;TP53;CDKN1B;HDAC3;PRKAA1;PTEN;CTNNB1;CASP3;BAX;MTOR;PRKDC;MYC;TSC2;EIF4EBP1;JUN;STAT3;LRP6;IKBKB;DEPTOR;KAT2B;PTGS2;BAK1;RB1;DNMT3B;KLF4;FOXO1;CDKN1A;RELA;SMARCC1;SRC		IKBKB;EIF4EBP1;SMARCC1;TP53;SRC;RB1;DEPTOR;DNMT1;DNMT3B;KAT2B;PTGS2;CASP3;JUN	BAX;LRP6;RB1;TP53;PRKAA1;DEPTOR;DNMT1;CDKN1B;KAT2B;SRC;TSC2;SQSTM1;FOXO1;CAV1;KDM5A;AKT1S1;RPTOR;DNMT3B;PTGS2;CASP3;PRKDC;EIF4EBP1;MTOR;SMARCC1;TWIST1;JUN;CDKN1A;CTNNB1;KLF4;IKBKB	DNMT3B;CTNNB1;ILK;FOXO1;PRKAA1;EIF4EBP1;TSC2;MYC;AKT1S1;PRKDC;CDKN1A;KDM1A;MTOR;DEPTOR;CAV1;KAT2B;SMARCC1;RPTOR;LRP6;RELA;SRC;CDKN1B;PTGS2;EGFR;BAX;JUN;KLF4;PTEN;TP53;RB1	RPTOR;IKBKB;DNMT3B;KDM1A;SMARCC1;KAT2B;TP53;RB1;MYC;PTGS2;HDAC3;CASP3;RELA;DNMT1;SQSTM1;STAT3;DEPTOR;JUN	CTNNB1;PRKDC;RPTOR;LRP6;TWIST1;CDKN1B;AKT1S1;KDM5A;TSC2;FOXO1;CAV1;CDKN1A;PRKAA1;BAX;SQSTM1;MTOR;KLF4	MTOR;FOXO1;KDM5A;PRKDC;KLF4;CDKN1B;LRP6;CTNNB1;CDKN1A;TSC2;EGFR	KLF4;BAK1;TSC2;DNMT3B	13		18	5	7	14
GO_REGULATION_OF_CELL_DIFFERENTIATION	8.607	13.595	6.831	11.384	18.465	14.263	15.036	7.375	26.997	11.422	23.624		8.724	27.141	21.592	13.018	19.487	14.071	4.437	RB1;TP53;FGFR1;ANXA1;FOS;JUN;KDM1A;STAT1;BAD;RELA;AURKA;MED1;DNMT3B;PTGS2;MYC;KAT2B		BAD;ERBB2;KIT;FOS;DNMT1;MTOR;ANXA1;TP53;ITGB1;PDGFRA;CAV1;NCOA1;SOCS1;GATA3;SMAD2;DNMT3B;STAT3;JUN;EGFR;VIM;RELA	RELA;CAV1;FOS;BAD;ERBB2;TP53	EGFR;PDGFRA;SMAD2;GATA3;BAD;NCOA1;STAT3;ERBB2;KIT;DNMT1;CAV1	ERBB2;PRKDC;ASH2L;ITGB1;NCOA1;PDGFRA;SMAD2;PTEN;MTOR;CDKN1B;CREBBP;VIM;RET;FOXO1;HDAC4;NOTCH1;CTNNB1;KLF4;MAP2K1;NFKBIA	SMAD2;DNMT3B;NCOA1;VIM;NFKBIA;IKBKB;EGFR;DNMT1;HDAC4;FOXO1;MED1;CREBBP;KDR;ITGB1;RELA;PIAS1;KIT;ERBB2;ILK;EZH2;KLF4;STAT3;NCOA3;CDKN1B;MTOR;RB1;CAV1;BAD		CDKN1B;EGFR;CREBBP;NCOA1;ITGB1;CAV1;NFKBIA;RELA;MTOR;RET;PTEN;NOTCH1;ILK;FOXO1;BAD;PRKDC;ERBB2;KLF4;SMAD2;HDAC4;VIM;MAP2K1;CTNNB1		CDKN1B;STAT3;RELA;KIT;BAD;MED1;CREBBP;RB1;ERBB2;PIAS1;CAV1;DNMT1;NCOA3;ILK;KDR;FOXO1;EGFR;MTOR;IKBKB;HDAC4;NCOA1;NFKBIA;SMAD2	JUN;SOCS1;ANXA1;VIM;MTOR;RELA;TP53;DNMT3B;EGFR;FOS;ITGB1	HDAC4;VIM;RELA;MAP2K1;KAT2B;TP53;PRKDC;FOXO1;NFKBIA;KDM1A;YAP1;CREBBP;AURKA;EGFR;NOTCH1;STAT1;ZEB1;RB1;KLF4;IKBKB;KDR;MYC;JUN;KIT;STAT3;RET;DNMT1;ITGB1;DNMT3B;NCOA3;CTNNB1;PDGFRA;FGFR1;NCOA1;BAD;SETD1A;MTOR;FOS;CDKN1B;ASH2L;ANXA1;PTGS2;PIAS1	FOS;ERBB2;TP53;CAV1;RELA	KDM1A;TP53;STAT3;KIT;NCOA3;FGFR1;STAT1;DNMT3B;RELA;BAD;AURKA;JUN;ALK;KDR;FOS;ANXA1;KAT2B;RB1;IKBKB;PTGS2;MYC	AURKA;NCOA3;HDAC4;NFKBIA;RET;ITGB1;TP53;CDKN1B;STAT1;PDGFRA;PTEN;CTNNB1;VIM;NCOA1;MTOR;PRKDC;ERBB2;MYC;CREBBP;FGFR1;ALK;JUN;KDR;STAT3;FOS;ASH2L;IKBKB;KAT2B;NOTCH1;PTGS2;SMAD2;BAD;RB1;DNMT3B;KLF4;MAP2K1;FOXO1;ANXA1;RELA;KIT;KDM1A		IKBKB;STAT1;ANXA1;KAT2B;BAD;TP53;RB1;KIT;DNMT1;FOS;DNMT3B;RET;AURKA;KDR;PTGS2;FGFR1;JUN	FGFR1;EP300;HDAC4;RB1;TP53;KDR;ZEB1;DNMT1;CDKN1B;CREBBP;KAT2B;AR;MAP2K1;ASH2L;CAV1;HDAC1;FOXO1;MED1;GATA3;DNMT3B;PTGS2;TNFSF11;KIT;PRKDC;AURKA;MTOR;BAD;TWIST1;JUN;VIM;NFKBIA;NCOA1;ANXA1;FOS;CTNNB1;SMAD2;ITGB1;STAT1;RET;KLF4;PDGFRA;ERBB2;IKBKB;NOTCH1	ERBB2;DNMT3B;CTNNB1;ILK;FOXO1;NCOA1;HDAC4;ITGB1;MYC;FGFR1;PRKDC;ANXA1;KDM1A;MTOR;CAV1;FOS;MED1;KAT2B;CREBBP;NOTCH1;RELA;MAP2K1;AURKA;RET;VIM;CDKN1B;PTGS2;EGFR;SMAD2;STAT1;JUN;NFKBIA;BAD;KLF4;PTEN;TP53;RB1	PIAS1;DNMT3B;KDR;BAD;RB1;PTGS2;RELA;DNMT1;ANXA1;KIT;IKBKB;STAT1;STAT3;JUN;NCOA3;FOS;KDM1A;FGFR1;KAT2B;TP53;MYC;SETD1A;AURKA;RET	MAP2K1;SMAD2;NCOA1;CTNNB1;NOTCH1;GATA3;HDAC4;MED1;ASH2L;EP300;NFKBIA;PDGFRA;PRKDC;TWIST1;ITGB1;RET;FOXO1;TNFSF11;BAD;VIM;KLF4;ZEB1;HDAC1;AR;CAV1;CREBBP;ERBB2;CDKN1B;MTOR	MTOR;NOTCH1;PDGFRA;HDAC4;CREBBP;RET;CTNNB1;EGFR;NFKBIA;ASH2L;MAP2K1;VIM;KLF4;ZEB1;NCOA1;FOXO1;ITGB1;PRKDC;CDKN1B;YAP1	ITGB1;SMAD2;MED1;EZH2;DNMT3B;KLF4;VIM	16		21	6	11	20
GO_CELLULAR_RESPONSE_TO_HORMONE_STIMULUS	11.014	13.551	4.703	9.071	13.036	11.295	13.038	10.26	19.929	12.049	20.519		10.344	20.621	21.863	11.155	11.732	10.49	2.509	SMARCC1;PIK3CA;EIF4EBP1;SMARCA4;ANXA1;FOS;STAT1;RELA;STAT5A;MED1;SRC;DNMT3B;KAT2B		STAT6;EGFR;RPS6KB1;KIT;CAV1;FOS;NCOA1;SOCS1;PRKAA1;DNMT3B;STAT3;ANXA1;IGF1R;STAT5A;RELA	CAV1;FOS;RELA	EGFR;NCOA1;RPS6KB1;STAT3;KIT;CAV1	NCOA1;ESR1;SHC1;PRKAA1;TSC2;PTEN;PRKDC;RPS6KB1;FOXO1;HDAC4;NOTCH1;STAT6	TSC2;MED1;EIF4EBP1;DNMT3B;NCOA1;STAT3;PIK3CA;NCOA3;EGFR;KIT;RELA;HDAC4;RPS6KB1;STAT6;CAV1;FOXO1		FOXO1;HDAC4;RELA;STAT6;PRKDC;CAV1;EGFR;RPS6KB1;PGR;NCOA1;PTEN;TSC2;NOTCH1;PRKAA1		RPS6KB1;FOXO1;KIT;STAT6;CAV1;TSC2;EGFR;NCOA3;PIK3CA;EIF4EBP1;STAT3;RELA;HDAC4;NCOA1;MED1	SOCS1;ANXA1;STAT5A;RELA;PRKAA1;DNMT3B;STAT6;FOS;EGFR;IGF1R	HDAC4;SMARCC1;RELA;KAT2B;STAT5A;PRKDC;FOXO1;YAP1;STAT1;EGFR;SMARCA4;NOTCH1;STAT6;KIT;STAT3;PIK3CA;ESR1;RPS6KB1;DNMT3B;NCOA3;NCOA1;CBX3;TSC2;FOS;ANXA1	FOS;CAV1;RELA	STAT5A;SMARCC1;FOS;ANXA1;RPS6KB1;PIK3CA;RELA;KAT2B;EIF4EBP1;STAT3;SRC;KIT;NCOA3;STAT1;DNMT3B	NCOA3;HDAC4;STAT5A;STAT1;PRKAA1;PTEN;NCOA1;PRKDC;TSC2;EIF4EBP1;RPS6KB1;STAT3;FOS;STAT6;KAT2B;NOTCH1;SHC1;PIK3CA;ESR1;DNMT3B;FOXO1;ANXA1;RELA;SMARCC1;KIT;SRC		STAT1;ANXA1;EIF4EBP1;PIK3CA;STAT6;SMARCC1;SRC;KIT;RPS6KB1;FOS;DNMT3B;KAT2B;STAT5A	RPS6KB1;EP300;HDAC4;STAT6;PRKAA1;ESR1;KAT2B;AR;SRC;TSC2;PIK3CA;FOXO1;CAV1;HDAC1;MED1;DNMT3B;KIT;PRKDC;STAT5A;EIF4EBP1;SMARCC1;NCOA1;ANXA1;FOS;STAT1;NOTCH1	DNMT3B;NCOA1;FOXO1;SMARCA4;PRKAA1;HDAC4;EIF4EBP1;TSC2;PRKDC;ANXA1;CAV1;FOS;MED1;KAT2B;SMARCC1;PIK3CA;PGR;NOTCH1;STAT6;RELA;SRC;EGFR;STAT1;STAT5A;RPS6KB1;PTEN	PIK3CA;STAT6;NCOA3;FOS;STAT1;DNMT3B;SMARCC1;STAT5A;KAT2B;RPS6KB1;RELA;ANXA1;STAT3;CBX3;KIT	ESR1;EP300;PRKDC;HDAC1;AR;TSC2;RPS6KB1;FOXO1;CAV1;PRKAA1;NOTCH1;STAT6;MED1;NCOA1;HDAC4	NOTCH1;ESR1;NCOA1;FOXO1;HDAC4;STAT6;SMARCA4;PRKDC;RPS6KB1;TSC2;EGFR;YAP1	MED1;DNMT3B;TSC2	13		15	3	6	12
GO_REGULATION_OF_TRANSFERASE_ACTIVITY	6.664	13.179	8.004	13.404	15.794	16.857	15.03	6.043	18.517	9.334	23.362		9.092	23.499	22.71	8.533	15.715	10.666	2.055	CCNC;PIK3CA;RB1;DEPTOR;TP53;PDGFRB;BAD;FGFR1;SRC;MYC;KAT2B		BAD;EGFR;PDGFRA;ERBB2;KIT;AKT1S1;CAV1;MET;SOCS1;DEPTOR;PRKAA1;CDKN1A;RPTOR;MTOR;ERBB3;TP53;IGF1R	CAV1;BAD;ERBB2;RPTOR;TP53	EGFR;PDGFRA;MET;BAD;RPTOR;DEPTOR;ERBB3;ERBB2;KIT;CAV1	MET;PDGFRA;SHC1;LRP6;BRAF;PRKAA1;TSC2;ERBB2;RET;PTEN;MTOR;MAP2K6;CDKN1B;AKT1S1;KLF4;MAP2K1;CTNNB1;CDKN1A	TSC2;RB1;DEPTOR;EGFR;MET;PIK3CA;LRP6;KDR;KIT;ERBB2;ILK;EZH2;KLF4;CDKN1B;MTOR;CASP3;RPTOR;ERBB3;CAV1;MAP2K6;BAD		AKT1S1;CDKN1B;EGFR;TSC2;PRKAA1;CAV1;MAP2K6;MTOR;RET;PTEN;ILK;BAD;ERBB2;RPTOR;KLF4;MET;LRP6;BRAF;MAP2K1;CDKN1A;CTNNB1		CDKN1B;KIT;BAD;LRP6;CASP3;ERBB3;TSC2;RB1;ERBB2;CAV1;MET;ILK;KDR;MAP2K6;RPTOR;EGFR;MTOR;PIK3CA;DEPTOR	SOCS1;MTOR;CDKN1A;PRKAA1;TP53;EGFR;IGF1R;AKT1S1	PDGFRB;MAP2K1;KAT2B;LRP6;TP53;EGFR;RB1;KLF4;BRAF;KDR;MYC;KIT;CASP3;CCNC;RPTOR;PIK3CA;RET;CTNNB1;PDGFRA;FGFR1;MAP2K6;BAD;MET;TSC2;MTOR;CDKN1B;CDKN1A;DEPTOR	TP53;ERBB2;CAV1;RPTOR	PDGFRB;TP53;KDR;CASP3;PIK3CA;KAT2B;BAD;MYC;CCNC;SRC;ALK;DEPTOR;KIT;FGFR1;RB1	PDGFRB;BRAF;RET;AKT1S1;TP53;CDKN1B;PRKAA1;PDGFRA;PTEN;CTNNB1;CASP3;MTOR;MAP2K6;ERBB2;MYC;FGFR1;ALK;TSC2;KDR;LRP6;DEPTOR;KAT2B;SHC1;PIK3CA;BAD;RB1;KLF4;MAP2K1;MET;CDKN1A;CCNC;KIT;SRC		PIK3CA;BAD;TP53;SRC;KIT;DEPTOR;RB1;CASP3;RET;KAT2B;KDR;CCNC;PDGFRB;FGFR1	LRP6;RB1;CCNC;KDR;PDGFRB;TP53;PRKAA1;DEPTOR;CDKN1B;KAT2B;SRC;TSC2;PIK3CA;MAP2K1;CAV1;AKT1S1;MET;RPTOR;TNFSF11;KIT;CASP3;MTOR;BAD;ERBB3;MAP2K6;CDKN1A;BRAF;CTNNB1;KLF4;RET;FGFR1;PDGFRA;ERBB2	ERBB2;CTNNB1;ILK;PDGFRB;PRKAA1;BRAF;TSC2;MYC;FGFR1;AKT1S1;CDKN1A;MET;MTOR;DEPTOR;CAV1;KAT2B;RPTOR;PIK3CA;LRP6;SRC;MAP2K1;CCNC;MAP2K6;RET;CDKN1B;EGFR;BAD;KLF4;PTEN;TP53;RB1	PIK3CA;RPTOR;PDGFRB;FGFR1;KDR;CCNC;KAT2B;BAD;RB1;TP53;MYC;CASP3;RET;KIT;DEPTOR	MAP2K1;BRAF;CTNNB1;TSC2;CDKN1A;MET;PDGFRA;RPTOR;LRP6;ERBB3;RET;TNFSF11;PRKAA1;BAD;KLF4;AKT1S1;MAP2K6;CAV1;ERBB2;CDKN1B;MTOR	MTOR;PDGFRA;MAP2K1;EGFR;RET;KLF4;BRAF;CDKN1B;LRP6;CTNNB1;CDKN1A;TSC2;MAP2K6;MET	EZH2;KLF4;TSC2	11		17	5	10	18
GO_RESPONSE_TO_PEPTIDE	11.808	13.144	2.151	13.687	12.821	14.967	11.383	12.354	21.592	15.665	29.107		12.462	22.387	26.459	12.149	11.501	11.26	2.66	STAT2;SMARCC1;PIK3CA;EIF4EBP1;TP53;ANXA1;SRC;STAT1;STAT5A;RELA;PTGS2;ITGA4;KAT2B		STAT6;RPS6KB1;CAV1;SOCS1;VIM;PRKAA1;STAT3;MTOR;STAT4;ANXA1;TP53;IGF1R;STAT5A;RELA	CAV1;CHUK;RELA;TP53	CAV1;RPS6KB1;STAT3	SHC1;VIM;PRKAA1;TSC2;PTEN;PRKDC;RPS6KB1;MTOR;CDKN1B;FOXO1;KLF4;NOTCH1;LRP6;STAT6;NFKBIA	TSC2;KLF4;EIF4EBP1;STAT3;VIM;PIK3CA;CDKN1B;LRP6;MTOR;NFKBIA;RELA;RPS6KB1;STAT6;CAV1;FOXO1		FOXO1;VIM;RELA;STAT6;PRKDC;CAV1;CDKN1B;MTOR;RPS6KB1;PTEN;TSC2;KLF4;NOTCH1;LRP6;PRKAA1;NFKBIA		RPS6KB1;CDKN1B;FOXO1;STAT6;CAV1;TSC2;MTOR;PIK3CA;EIF4EBP1;STAT3;RELA;NFKBIA;LRP6	SOCS1;ANXA1;VIM;STAT5A;MTOR;STAT4;RELA;PRKAA1;TP53;STAT6;IGF1R	VIM;SMARCC1;RELA;KAT2B;STAT5A;LRP6;TP53;PRKDC;FOXO1;CHUK;NFKBIA;STAT1;NOTCH1;STAT6;ITGA4;KLF4;STAT3;PIK3CA;RPS6KB1;TSC2;STAT2;MTOR;CDKN1B;ANXA1;PTGS2	TP53;CAV1;RELA;CHUK	STAT5A;SMARCC1;PTGS2;TP53;RPS6KB1;STAT2;ANXA1;CHUK;PIK3CA;ITGA4;RELA;KAT2B;EIF4EBP1;STAT3;SRC;STAT1;STAT4	NFKBIA;STAT5A;TP53;CDKN1B;STAT1;CHUK;PRKAA1;PTEN;VIM;MTOR;STAT2;PRKDC;TSC2;EIF4EBP1;RPS6KB1;STAT3;STAT4;LRP6;STAT6;KAT2B;NOTCH1;PTGS2;SHC1;PIK3CA;KLF4;ITGA4;FOXO1;ANXA1;RELA;SMARCC1;SRC		STAT2;STAT1;ANXA1;EIF4EBP1;PIK3CA;STAT4;STAT6;SMARCC1;TP53;SRC;RPS6KB1;KAT2B;PTGS2;STAT5A	RPS6KB1;LRP6;STAT6;TP53;PRKAA1;CDKN1B;KAT2B;SRC;TSC2;PIK3CA;FOXO1;CAV1;STAT2;STAT4;PTGS2;PRKDC;STAT5A;EIF4EBP1;MTOR;SMARCC1;VIM;NFKBIA;ANXA1;STAT1;KLF4;NOTCH1	FOXO1;PRKAA1;ITGA4;EIF4EBP1;TSC2;PRKDC;ANXA1;RPS6KB1;MTOR;CAV1;KAT2B;STAT2;SMARCC1;PIK3CA;NOTCH1;LRP6;STAT6;RELA;SRC;VIM;CDKN1B;PTGS2;STAT1;NFKBIA;STAT5A;KLF4;PTEN;TP53	PIK3CA;STAT6;STAT1;SMARCC1;CHUK;STAT5A;KAT2B;TP53;RPS6KB1;PTGS2;RELA;ANXA1;STAT3;ITGA4;STAT2	NFKBIA;PRKDC;LRP6;CDKN1B;TSC2;RPS6KB1;FOXO1;CAV1;PRKAA1;NOTCH1;STAT6;MTOR;VIM;KLF4	MTOR;NOTCH1;FOXO1;STAT6;PRKDC;KLF4;VIM;CDKN1B;LRP6;RPS6KB1;TSC2;NFKBIA	TSC2;KLF4;VIM	13		14	4	3	15
GO_LEUKOCYTE_DIFFERENTIATION	7.945	12.969	4.998	6.332	9.059	7.315	7.61	7.821	11.72	8.062	14.636		6.416	15.934	14.473	7.441	11.34	5.138	2.63	RB1;TP53;ANXA1;FOS;JUN;BAD;ITGA4;MED1;SRC;MYC		BAD;ERBB2;KIT;FOS;SOCS1;GATA3;ATM;STAT3;MTOR;TP53;ANXA1;JUN;ITGB1;STAT6	FOS;BAD;TP53;ERBB2	GATA3;ATM;BAD;STAT3;ERBB2;KIT	BAX;ERBB2;PRKDC;MTOR;BAK1;CTNNB1;ITGB1;HDAC4;STAT6	MED1;STAT3;ATM;MTOR;BAK1;KIT;ITGB1;HDAC4;ERBB2;STAT6;RB1;BAD		HDAC4;BAX;BAD;PRKDC;STAT6;ERBB2;MTOR;ATM;CTNNB1;ITGB1		ERBB2;KIT;STAT6;MTOR;RB1;STAT3;HDAC4;BAD;MED1;ATM	JUN;SOCS1;ANXA1;MTOR;STAT6;TP53;FOS;ITGB1	PRKDC;HDAC4;CTNNB1;MYC;BAD;KIT;JUN;STAT3;MTOR;FOS;ITGB1;ZEB1;ANXA1;STAT6;TP53;ITGA4;RB1	TP53;FOS;ERBB2	TP53;FOS;ANXA1;ITGA4;BAD;MYC;STAT3;SRC;JUN;KIT;RB1	HDAC4;ITGB1;TP53;CTNNB1;BAX;MTOR;PRKDC;ERBB2;MYC;JUN;STAT3;FOS;STAT6;BAK1;BAD;RB1;ITGA4;ANXA1;KIT;SRC		ANXA1;BAD;STAT6;TP53;SRC;KIT;RB1;FOS;JUN	BAX;EP300;HDAC4;RB1;STAT6;TP53;ZEB1;SRC;MED1;GATA3;TNFSF11;KIT;PRKDC;MTOR;BAD;JUN;ANXA1;FOS;CTNNB1;ITGB1;ERBB2	ERBB2;ATM;CTNNB1;HDAC4;ITGA4;ITGB1;MYC;PRKDC;ANXA1;MTOR;FOS;MED1;STAT6;SRC;BAX;JUN;BAD;TP53;RB1	STAT6;FOS;TP53;BAD;RB1;MYC;ANXA1;STAT3;ITGA4;KIT;JUN	CTNNB1;ZEB1;EP300;PRKDC;ITGB1;ERBB2;TNFSF11;BAX;GATA3;BAD;STAT6;MED1;MTOR;HDAC4	MTOR;HDAC4;ITGB1;STAT6;PRKDC;CTNNB1;ZEB1	MED1;ITGB1;BAK1	10		14	4	6	9
GO_POSITIVE_REGULATION_OF_CELLULAR_COMPONENT_MOVEMENT	5.662	12.833	7.401	6.252	7.812	8.345	7.513	6.388	13.763	7.967	14.443		7.381	15.73	14.306	7.345	8.86	7.265		ANXA1;JUN;PDGFRB;STAT5A;FGFR1;SRC;PTGS2;ITGA4		EGFR;PDGFRA;KIT;CAV1;MET;GATA3;ATM;STAT3;MTOR;ANXA1;JUN;ITGB1;IGF1R;STAT5A		EGFR;PDGFRA;GATA3;ATM;MET;STAT3;KIT;CAV1	CLDN1;PDGFRA;MET;ITGA5;RET;MTOR;ITGB1;HDAC4;NOTCH1	STAT3;ATM;MTOR;KDR;EGFR;KIT;ITGB1;HDAC4;MET;ILK;CAV1		ILK;HDAC4;ITGA5;MTOR;EGFR;ATM;RET;ITGB1;MET;NOTCH1;CAV1		CAV1;MET;MTOR;EGFR;ILK;KDR;STAT3;HDAC4;KIT;ATM	JUN;ANXA1;STAT5A;MTOR;EGFR;IGF1R;ITGB1	HDAC4;PDGFRB;STAT5A;ITGA5;EGFR;NOTCH1;ITGA4;KDR;JUN;KIT;STAT3;RET;ITGB1;PDGFRA;FGFR1;MET;MTOR;ANXA1;PTGS2		STAT5A;PTGS2;PDGFRB;KDR;ANXA1;ITGA4;STAT3;SRC;JUN;KIT;FGFR1	CLDN1;PDGFRB;HDAC4;RET;STAT5A;ITGB1;PDGFRA;MTOR;FGFR1;ITGA5;JUN;KDR;STAT3;NOTCH1;PTGS2;MET;ITGA4;ANXA1;KIT;SRC		FGFR1;ANXA1;SRC;KIT;RET;KDR;PTGS2;PDGFRB;STAT5A;JUN	HDAC4;PDGFRB;KDR;SRC;CAV1;CLDN1;ITGA5;GATA3;MET;PTGS2;KIT;STAT5A;MTOR;TWIST1;JUN;ANXA1;ITGB1;RET;FGFR1;PDGFRA;NOTCH1	ATM;ILK;PDGFRB;HDAC4;ITGA4;ITGB1;FGFR1;ANXA1;MET;ITGA5;MTOR;CAV1;NOTCH1;SRC;RET;PTGS2;EGFR;JUN;STAT5A	PDGFRB;FGFR1;KDR;STAT5A;PTGS2;ANXA1;STAT3;ITGA4;RET;KIT;JUN	PDGFRA;TWIST1;ITGB1;RET;CAV1;NOTCH1;GATA3;MET;CLDN1;HDAC4;MTOR;ITGA5	MTOR;NOTCH1;PDGFRA;HDAC4;ITGB1;EGFR;RET;ITGA5;MET		8		14		8	9
GO_CELLULAR_RESPONSE_TO_EXTERNAL_STIMULUS	11.317	12.812	4.809	8.092	12.868	10.635	11.006	9.468	18.015	8.939	17.543		8.156	16.291	21.349	10.933	8.811	6.461	3.082	EHMT2;TP53;JUN;FOS;ATG7;BAD;ULK1;MAPK8;MED1;PTGS2;ITGA4		BAD;EGFR;CDKN1A;FOS;NCOA1;PRKAA1;RPTOR;MTOR;TP53;JUN;CHEK1;MAP1LC3B	CHEK1;FOS;BAD;RPTOR;TP53	EGFR;CHEK1;BAD;NCOA1;RPTOR	NCOA1;PRKAA1;MAP1LC3A;MTOR;BAK1;FOXO1;HDAC4;CDKN1A;CHEK1	MAP1LC3B;BECN1;CHEK1;MED1;NCOA1;FOXO1;MTOR;BAK1;MAPK8;EGFR;RPTOR;HDAC4;BAD		FOXO1;HDAC4;MAP1LC3A;BAD;RPTOR;MTOR;EGFR;CDKN1A;NCOA1;CHEK1;PRKAA1		CHEK1;FOXO1;RPTOR;BAD;EGFR;MAPK8;MTOR;BECN1;HDAC4;NCOA1;MED1	JUN;MTOR;MAP1LC3B;CDKN1A;PRKAA1;TP53;EGFR;FOS	HDAC4;MAP1LC3A;CHEK1;TP53;EHMT2;ATG7;FOXO1;ULK1;EGFR;ITGA4;JUN;RPTOR;MAPK8;NCOA1;BAD;MTOR;FOS;CDKN1A;PTGS2	TP53;FOS;CHEK1;RPTOR	PTGS2;EHMT2;TP53;FOS;ITGA4;MAPK8;BAD;ATG7;ULK1;JUN	CHEK1;HDAC4;TP53;PRKAA1;NCOA1;MTOR;EHMT2;MAP1LC3A;JUN;FOS;ATG7;PTGS2;BAK1;MAPK8;BAD;ITGA4;FOXO1;ULK1;CDKN1A		CHEK1;ATG7;BAD;TP53;FOS;ULK1;PTGS2;MAPK8;JUN	BAD;MAP1LC3A;PTGS2;JUN;ATG7;CDKN1A;FOXO1;HDAC4;NCOA1;FOS;MAPK8;CHEK1;TP53;MED1;ULK1;PRKAA1;MTOR;RPTOR	NCOA1;FOXO1;PRKAA1;HDAC4;ITGA4;MAP1LC3A;ATG7;CDKN1A;EHMT2;MTOR;FOS;MED1;RPTOR;MAPK8;CHEK1;PTGS2;EGFR;ULK1;JUN;BAD;TP53	ATG7;JUN;RPTOR;FOS;ULK1;MAPK8;BAD;TP53;PTGS2;CHEK1;ITGA4;EHMT2	RPTOR;MAP1LC3A;FOXO1;CDKN1A;PRKAA1;BAD;HDAC4;MED1;NCOA1;MTOR	MTOR;NCOA1;FOXO1;HDAC4;MAP1LC3A;CDKN1A;EGFR	MAP1LC3B;MED1;BAK1	11		12	5	5	9
GO_CIRCULATORY_SYSTEM_DEVELOPMENT	6.327	12.611	8.844	17.658	20.028	18.708	16.978	4.803	21.917	7.94	25.665		8.672	29.591	25.224	8.982	19.895	12.605	5.389	PIK3CA;RB1;TP53;FGFR1;ANXA1;JUN;PDGFRB;STAT1;MED1;PTGS2;KAT2B		EGFR;PDGFRA;ERBB2;KIT;CAV1;CDKN1A;DNMT1;GATA3;ATM;STAT3;MTOR;SMAD2;TP53;ANXA1;ERBB3;JUN;ITGB1	CAV1;TP53;ERBB2	EGFR;PDGFRA;GATA3;SMAD2;ATM;STAT3;ERBB3;ERBB2;DNMT1;KIT;CAV1	BAX;TSC2;ERBB2;PRKDC;BAK1;ITGB1;SIRT6;PDGFRA;SMAD2;PTEN;MTOR;CDKN1B;LRP6;ITGA5;FOXO1;NOTCH1;SHC1;JAK1;CTNNB1;CDKN1A;KLF4;MAP2K1	TSC2;SMAD2;RB1;EGFR;DNMT1;SIRT6;FOXO1;MED1;PIK3CA;LRP6;KDR;ITGB1;YWHAZ;BAK1;KIT;ERBB2;ILK;KLF4;STAT3;ATM;CDKN1B;MTOR;CASP3;ERBB3;CAV1		ITGA5;SIRT6;CDKN1B;EGFR;TSC2;ITGB1;CAV1;MTOR;PTEN;NOTCH1;JAK1;ILK;FOXO1;PRKDC;ERBB2;KLF4;LRP6;SMAD2;BAX;MAP2K1;ATM;CDKN1A;CTNNB1		CDKN1B;STAT3;KIT;MED1;LRP6;CASP3;ERBB3;TSC2;RB1;ERBB2;CAV1;DNMT1;ILK;KDR;ATM;FOXO1;EGFR;MTOR;PIK3CA;SIRT6;SMAD2	JUN;ANXA1;MTOR;CDKN1A;TP53;EGFR;ITGB1	PDGFRB;MAP2K1;KAT2B;LRP6;TP53;PRKDC;FOXO1;ITGA5;YAP1;STAT1;EGFR;NOTCH1;RB1;KLF4;KDR;JUN;KIT;STAT3;CASP3;PIK3CA;DNMT1;ITGB1;CTNNB1;PDGFRA;FGFR1;TSC2;HK2;MTOR;CDKN1B;CDKN1A;ANXA1;PTGS2	TP53;ERBB2;CAV1	PTGS2;PDGFRB;TP53;KDR;ANXA1;CASP3;PIK3CA;KAT2B;STAT3;JUN;KIT;FGFR1;STAT1;RB1	PDGFRB;ITGB1;JAK1;CDKN1B;STAT1;TP53;PDGFRA;PTEN;CTNNB1;CASP3;BAX;MTOR;SIRT6;PRKDC;ERBB2;FGFR1;ITGA5;TSC2;JUN;KDR;STAT3;LRP6;KAT2B;NOTCH1;PTGS2;SHC1;BAK1;PIK3CA;SMAD2;RB1;KLF4;MAP2K1;FOXO1;CDKN1A;ANXA1;KIT		STAT1;ANXA1;PIK3CA;TP53;RB1;KIT;CASP3;DNMT1;KAT2B;KDR;PTGS2;PDGFRB;FGFR1;JUN	FGFR1;BAX;EP300;LRP6;RB1;PDGFRB;KDR;TP53;DNMT1;CDKN1B;KAT2B;TSC2;PIK3CA;MAP2K1;CAV1;FOXO1;ITGA5;MED1;GATA3;PTGS2;KIT;CASP3;JAK1;PRKDC;MTOR;ERBB3;TWIST1;JUN;CDKN1A;ANXA1;CTNNB1;SMAD2;KLF4;ITGB1;STAT1;SIRT6;PDGFRA;ERBB2;NOTCH1	ERBB2;ATM;CTNNB1;ILK;FOXO1;PDGFRB;SIRT6;TSC2;JAK1;ITGB1;FGFR1;PRKDC;CDKN1A;ANXA1;ITGA5;MTOR;CAV1;MED1;KAT2B;PIK3CA;NOTCH1;LRP6;MAP2K1;CDKN1B;PTGS2;EGFR;SMAD2;STAT1;BAX;JUN;KLF4;PTEN;TP53;RB1	PIK3CA;HK2;PDGFRB;STAT1;FGFR1;KDR;KAT2B;TP53;RB1;PTGS2;CASP3;DNMT1;ANXA1;STAT3;KIT;JUN	MAP2K1;SMAD2;ITGA5;CTNNB1;JAK1;TSC2;CDKN1A;NOTCH1;GATA3;BAX;MED1;EP300;PDGFRA;PRKDC;LRP6;TWIST1;ERBB3;ITGB1;FOXO1;SIRT6;KLF4;CAV1;ERBB2;CDKN1B;MTOR	MTOR;NOTCH1;PDGFRA;FOXO1;ITGB1;MAP2K1;EGFR;PRKDC;KLF4;CDKN1B;LRP6;CTNNB1;CDKN1A;TSC2;ITGA5;YAP1	ITGB1;SMAD2;MED1;TSC2;KLF4;BAK1;YWHAZ	11		17	3	11	22
GO_GLAND_DEVELOPMENT	12.53	12.534	8.004	14.58	11.121	17.272	10.816	5.636	21.722	9.981	25.197		10.62	29.714	29.779	10.545	19.313	11.958	2.788	SMARCC1;PIK3CA;BRCA2;FGFR1;ANXA1;JUN;PHF2;SRC;PDGFRB;AURKA;MED1;STAT5A;RELA		EGFR;PDGFRA;CAV1;NCOA1;MET;GATA3;ATM;SMAD2;ANXA1;JUN;STAT6;STAT5A;RELA	CAV1;RELA	EGFR;PDGFRA;SMAD2;GATA3;ATM;MET;NCOA1;CAV1	NCOA1;ESR1;CLDN1;BAX;MET;PDGFRA;SMAD2;PRKDC;PTEN;CDKN1B;CTNNB1;NOTCH1;MAP2K1;LRP6;STAT6	SMAD2;MED1;NCOA1;PIK3CA;ATM;CDKN1B;LRP6;EGFR;EZH2;RELA;MET;STAT6;CAV1		BAX;RELA;STAT6;MAP2K1;PRKDC;CDKN1B;EGFR;CAV1;ATM;PGR;NCOA1;PTEN;CTNNB1;MET;NOTCH1;LRP6;SMAD2		CDKN1B;STAT6;CAV1;MET;EGFR;PIK3CA;SMAD2;RELA;NCOA1;MED1;ATM;LRP6	JUN;ANXA1;STAT5A;RELA;STAT6;EGFR	SMARCC1;RELA;PDGFRB;MAP2K1;STAT5A;LRP6;PRKDC;AURKA;EGFR;NOTCH1;STAT6;JUN;BRCA2;PIK3CA;ESR1;CTNNB1;PDGFRA;FGFR1;NCOA1;PHF2;MET;HK2;CDKN1B;ANXA1	CAV1;RELA	STAT5A;SMARCC1;PDGFRB;PHF2;BRCA2;ANXA1;PIK3CA;RELA;SRC;AURKA;JUN;FGFR1	AURKA;BRCA2;CLDN1;PDGFRB;STAT5A;CDKN1B;PDGFRA;PTEN;CTNNB1;BAX;NCOA1;PRKDC;FGFR1;JUN;LRP6;STAT6;NOTCH1;PIK3CA;SMAD2;ESR1;PHF2;MAP2K1;MET;ANXA1;RELA;SMARCC1;SRC		FGFR1;ANXA1;PIK3CA;STAT6;SMARCC1;SRC;BRCA2;AURKA;PDGFRB;PHF2;STAT5A;JUN	BAX;LRP6;STAT6;PDGFRB;ESR1;CDKN1B;AR;SRC;PIK3CA;MAP2K1;CAV1;CLDN1;MED1;GATA3;MET;TNFSF11;PRKDC;AURKA;STAT5A;PHF2;SMARCC1;JUN;NCOA1;ANXA1;CTNNB1;SMAD2;BRCA2;FGFR1;PDGFRA;NOTCH1	ATM;NCOA1;CTNNB1;PHF2;PDGFRB;FGFR1;PRKDC;ANXA1;MET;CAV1;MED1;SMARCC1;PIK3CA;PGR;NOTCH1;LRP6;STAT6;RELA;MAP2K1;SRC;AURKA;BRCA2;CDKN1B;EGFR;SMAD2;BAX;JUN;STAT5A;PTEN	PIK3CA;STAT6;HK2;PDGFRB;FGFR1;PHF2;SMARCC1;STAT5A;BRCA2;RELA;ANXA1;AURKA;JUN	ESR1;MAP2K1;SMAD2;NCOA1;CTNNB1;NOTCH1;GATA3;MET;BAX;MED1;PDGFRA;PRKDC;LRP6;TNFSF11;CLDN1;AR;CAV1;STAT6;CDKN1B	NOTCH1;ESR1;NCOA1;PDGFRA;STAT6;MAP2K1;PRKDC;CDKN1B;LRP6;CTNNB1;EGFR;MET	MED1;EZH2;SMAD2	13		13	2	8	15
GO_TOR_SIGNALING	3.128	12.303	8.496	5.516	11.378	8.486	12.044	3.82	6.833	5.309	9.409		4.184	10.935	11.358	5.032	8.133	3.303		EIF4EBP1;PIK3CA;DEPTOR		RPS6KB1;AKT1S1;DEPTOR;HDAC3;PRKAA1;GATA3;RPTOR;ATM;MTOR		GATA3;ATM;RPS6KB1;RPTOR;DEPTOR;HDAC3	PRKAA1;TSC2;RPS6KB1;MTOR;AKT1S1	TSC2;EIF4EBP1;DEPTOR;PIK3CA;ATM;MTOR;RPTOR;RPS6KB1;HDAC3		RPTOR;AKT1S1;MTOR;ATM;RPS6KB1;TSC2;PRKAA1		RPS6KB1;RPTOR;MTOR;TSC2;PIK3CA;EIF4EBP1;HDAC3;DEPTOR;ATM	MTOR;PRKAA1;AKT1S1	HDAC3;TSC2;MTOR;RPTOR;PIK3CA;RPS6KB1;DEPTOR		RPS6KB1;PIK3CA;HDAC3;EIF4EBP1;DEPTOR	MTOR;DEPTOR;AKT1S1;TSC2;EIF4EBP1;PIK3CA;PRKAA1;HDAC3;RPS6KB1		PIK3CA;EIF4EBP1;DEPTOR;RPS6KB1	DEPTOR;RPS6KB1;TSC2;PIK3CA;AKT1S1;EIF4EBP1;PRKAA1;GATA3;MTOR;RPTOR	ATM;MTOR;DEPTOR;PRKAA1;EIF4EBP1;TSC2;RPTOR;RPS6KB1;AKT1S1;PIK3CA	PIK3CA;RPTOR;RPS6KB1;HDAC3;DEPTOR	RPTOR;AKT1S1;TSC2;RPS6KB1;PRKAA1;GATA3;MTOR	MTOR;TSC2;RPS6KB1		3		9		6	5
GO_POSITIVE_REGULATION_OF_PROTEIN_KINASE_B_SIGNALING	3.746	12.303	9.027	7.29	9.757	7.244	8.903	4.704	10.584	4.505	11.716		5.972	16.148	10.892	4.245	11.203	8.068		PDGFRB;FGFR1;SRC;PIK3CA		EGFR;PDGFRA;ERBB2;KIT;MET;GATA3;MTOR;ERBB3;ITGB1;IGF1R		EGFR;PDGFRA;GATA3;MET;ERBB3;ERBB2;KIT	ESR1;PDGFRA;MET;ERBB2;RET;MTOR;ITGB1	PIK3CA;MTOR;KIT;EGFR;ITGB1;ILK;ERBB2;MET;ERBB3		ILK;ERBB2;MTOR;EGFR;RET;ITGB1;MET		ERBB3;ERBB2;MET;EGFR;MTOR;PIK3CA;ILK;KIT	MTOR;EGFR;IGF1R;ITGB1	PDGFRA;FGFR1;KIT;MET;PDGFRB;MTOR;PIK3CA;RET;ESR1;EGFR;ITGB1		PDGFRB;PIK3CA;SRC;KIT;FGFR1	MTOR;PDGFRB;MET;ERBB2;RET;ITGB1;FGFR1;ESR1;PIK3CA;PDGFRA;KIT;SRC		PIK3CA;SRC;KIT;RET;PDGFRB;FGFR1	ERBB3;ESR1;TNFSF11;SRC;KIT;PIK3CA;PDGFRB;ITGB1;RET;FGFR1;PDGFRA;ERBB2;GATA3;MET;MTOR	ERBB2;MET;ILK;FGFR1;MTOR;PDGFRB;SRC;ITGB1;RET;PIK3CA;EGFR	PIK3CA;PDGFRB;FGFR1;RET;KIT	ESR1;PDGFRA;ERBB3;ITGB1;RET;ERBB2;TNFSF11;GATA3;MET;MTOR	MTOR;PDGFRA;ESR1;ITGB1;RET;EGFR;MET		4		10		7	7
GO_POSITIVE_REGULATION_OF_DEVELOPMENTAL_PROCESS	11.273	12.249	3.973	10.221	12.243	13.236	9.599	8.524	21.238	13.669	24.617		10.421	27.19	23.297	14.419	18.878	7.987	4.151	RB1;TP53;FGFR1;ANXA1;FOS;JUN;KDM1A;PDGFRB;STAT1;BAD;RELA;AURKA;MED1;SRC;DNMT3B;PTGS2;MYC		BAD;KIT;FOS;NCOA1;SOCS1;PRKAA1;GATA3;DNMT3B;STAT3;MTOR;SMAD2;TP53;ANXA1;ERBB3;JUN;ITGB1;STAT6;RELA	FOS;RELA;BAD;TP53	SMAD2;GATA3;BAD;NCOA1;STAT3;ERBB3;KIT	NCOA1;SIRT6;BAX;JAK1;SMAD2;PRKAA1;RET;ITGA5;PRKDC;PTEN;MTOR;CTNNB1;ITGB1;KLF4;MAP2K1;NOTCH1;STAT6	SMAD2;DNMT3B;NCOA1;RB1;SIRT6;MED1;KDR;ITGB1;RELA;PIAS1;KIT;STAT6;ILK;EZH2;KLF4;STAT3;NCOA3;MTOR;ERBB3;BAD		ITGA5;SIRT6;STAT6;NCOA1;ITGB1;PRKAA1;RELA;MTOR;RET;PTEN;NOTCH1;JAK1;ILK;BAD;PRKDC;KLF4;SMAD2;BAX;MAP2K1;CTNNB1		ERBB3;KIT;STAT6;PIAS1;MTOR;NCOA1;NCOA3;ILK;RB1;KDR;STAT3;RELA;MED1;BAD;SIRT6;SMAD2	JUN;SOCS1;ANXA1;MTOR;RELA;PRKAA1;TP53;DNMT3B;STAT6;FOS;ITGB1	RELA;PDGFRB;MAP2K1;TP53;PRKDC;ITGA5;KDM1A;YAP1;AURKA;STAT1;NOTCH1;STAT6;ZEB1;RB1;KLF4;KDR;MYC;JUN;KIT;STAT3;RET;ITGB1;DNMT3B;NCOA3;CTNNB1;FGFR1;NCOA1;BAD;HK2;MTOR;FOS;ANXA1;PTGS2;PIAS1	TP53;FOS;RELA	KDM1A;TP53;STAT3;SRC;KIT;NCOA3;FGFR1;STAT1;DNMT3B;RELA;BAD;AURKA;JUN;ALK;PDGFRB;KDR;FOS;ANXA1;RB1;PTGS2;MYC	AURKA;PDGFRB;NCOA3;ITGB1;RET;KDM1A;JAK1;TP53;STAT1;PRKAA1;PTEN;CTNNB1;BAX;NCOA1;MTOR;SIRT6;PRKDC;MYC;FGFR1;ALK;ITGA5;JUN;KDR;STAT3;FOS;STAT6;NOTCH1;PTGS2;SMAD2;BAD;RB1;DNMT3B;KLF4;MAP2K1;ANXA1;RELA;KIT;SRC		STAT1;ANXA1;BAD;STAT6;TP53;SRC;KIT;RB1;FOS;DNMT3B;RET;AURKA;KDR;PTGS2;PDGFRB;FGFR1;JUN	FGFR1;BAX;EP300;RB1;STAT6;PDGFRB;KDR;TP53;ZEB1;PRKAA1;AR;SRC;MAP2K1;HDAC1;ITGA5;MED1;GATA3;DNMT3B;PTGS2;TNFSF11;KIT;JAK1;PRKDC;AURKA;MTOR;BAD;ERBB3;TWIST1;JUN;NCOA1;ANXA1;FOS;CTNNB1;SMAD2;KLF4;ITGB1;STAT1;RET;SIRT6;NOTCH1	DNMT3B;NCOA1;CTNNB1;ILK;PDGFRB;PRKAA1;SIRT6;JAK1;ITGB1;MYC;FGFR1;PRKDC;ANXA1;ITGA5;KDM1A;MTOR;FOS;MED1;NOTCH1;STAT6;RELA;MAP2K1;SRC;AURKA;RET;PTGS2;SMAD2;STAT1;BAX;JUN;BAD;KLF4;PTEN;TP53;RB1	PIAS1;DNMT3B;KDR;BAD;RB1;PTGS2;RELA;ANXA1;KIT;HK2;STAT1;STAT3;JUN;STAT6;NCOA3;FOS;PDGFRB;KDM1A;FGFR1;TP53;MYC;AURKA;RET	MAP2K1;SMAD2;NCOA1;ITGA5;CTNNB1;JAK1;NOTCH1;GATA3;BAX;MED1;EP300;PRKDC;TWIST1;ERBB3;ITGB1;RET;TNFSF11;PRKAA1;SIRT6;BAD;KLF4;ZEB1;HDAC1;AR;STAT6;MTOR	MTOR;NOTCH1;NCOA1;STAT6;ITGB1;MAP2K1;RET;PRKDC;KLF4;CTNNB1;ITGA5;YAP1;ZEB1	ITGB1;SMAD2;MED1;EZH2;DNMT3B;KLF4	17		18	4	7	17
GO_LYMPHOCYTE_DIFFERENTIATION	2.718	12.048	5.773	7.562	8.241	8.72	6.542	6.043	9.44	4.067	11.411		3.412	11.494	9.802	4.666	10.681	6.062	1.929	BAD;TP53;ANXA1;ITGA4		BAD;ERBB2;KIT;SOCS1;GATA3;ATM;STAT3;MTOR;ANXA1;TP53;ITGB1;STAT6	BAD;TP53;ERBB2	GATA3;ATM;BAD;STAT3;ERBB2;KIT	BAX;ERBB2;PRKDC;MTOR;BAK1;CTNNB1;ITGB1;HDAC4;STAT6	STAT3;ATM;MTOR;BAK1;KIT;ITGB1;HDAC4;ERBB2;STAT6;BAD		HDAC4;BAX;BAD;PRKDC;STAT6;ERBB2;MTOR;ATM;CTNNB1;ITGB1		ERBB2;KIT;STAT6;MTOR;STAT3;HDAC4;BAD;ATM	SOCS1;ANXA1;MTOR;STAT6;TP53;ITGB1	PRKDC;HDAC4;CTNNB1;BAD;KIT;STAT3;MTOR;ITGB1;ZEB1;ANXA1;STAT6;TP53;ITGA4	TP53;ERBB2	TP53;ANXA1;ITGA4;BAD;STAT3;KIT	MTOR;BAD;PRKDC;STAT6;ERBB2;HDAC4;ITGA4;ITGB1;TP53;CTNNB1;BAK1;ANXA1;STAT3;BAX;KIT		ANXA1;BAD;STAT6;TP53;KIT	BAD;BAX;EP300;KIT;HDAC4;ANXA1;PRKDC;CTNNB1;STAT6;TP53;ITGB1;ZEB1;ERBB2;GATA3;MTOR	ERBB2;ANXA1;ATM;CTNNB1;STAT6;MTOR;BAX;HDAC4;ITGA4;BAD;ITGB1;TP53;PRKDC	STAT6;TP53;BAD;STAT3;ANXA1;ITGA4;KIT	CTNNB1;ZEB1;EP300;PRKDC;ITGB1;ERBB2;BAX;GATA3;BAD;STAT6;MTOR;HDAC4	MTOR;HDAC4;ITGB1;STAT6;PRKDC;CTNNB1;ZEB1	ITGB1;BAK1	4		12	3	6	9
GO_PEPTIDYL_TYROSINE_MODIFICATION	2.711	12.036	8.545	8.764	8.227	8.701	8.995	4.797	10.54	6.039	14.977		5.31	13.847	10.914	4.654	9.368	7.275		PDGFRB;FGFR1;SRC;TP53		EGFR;PDGFRA;ERBB2;KIT;CAV1;MET;SOCS1;STAT3;MTOR;ERBB3;TP53;IGF1R	CAV1;TP53;ERBB2	EGFR;PDGFRA;MET;STAT3;ERBB3;ERBB2;KIT;CAV1	MET;PDGFRA;SHC1;JAK1;ERBB2;RET;ITGA5;MTOR;MAP2K6;MAP2K1	STAT3;MTOR;KDR;EGFR;KIT;ERBB2;MET;ERBB3;CAV1;MAP2K6		MAP2K6;ITGA5;ERBB2;MAP2K1;CAV1;MTOR;EGFR;RET;MET;JAK1		ERBB3;ERBB2;MAP2K6;CAV1;MET;EGFR;MTOR;KDR;STAT3;KIT	SOCS1;MTOR;TP53;EGFR;IGF1R	MAP2K6;KDR;PDGFRA;FGFR1;KIT;MET;PDGFRB;STAT3;ITGA5;MAP2K1;MTOR;RET;EGFR;TP53	TP53;ERBB2;CAV1	PDGFRB;TP53;KDR;STAT3;SRC;ALK;KIT;FGFR1	MTOR;PDGFRB;MAP2K1;MET;MAP2K6;ERBB2;RET;KDR;JAK1;FGFR1;TP53;ALK;ITGA5;SHC1;STAT3;PDGFRA;KIT;SRC		TP53;SRC;KIT;RET;KDR;PDGFRB;FGFR1	ERBB3;KIT;SRC;MAP2K6;MAP2K1;JAK1;CAV1;PDGFRB;KDR;TP53;ITGA5;RET;FGFR1;PDGFRA;ERBB2;MET;MTOR	ERBB2;MET;ITGA5;FGFR1;MTOR;PDGFRB;CAV1;SRC;MAP2K1;MAP2K6;JAK1;RET;TP53;EGFR	PDGFRB;FGFR1;KDR;TP53;STAT3;RET;KIT	PDGFRA;MAP2K1;ERBB3;JAK1;MAP2K6;RET;CAV1;ERBB2;MET;MTOR;ITGA5	MTOR;PDGFRA;MAP2K1;EGFR;RET;MAP2K6;ITGA5;MET		4		12	3	8	10
GO_RESPONSE_TO_EXTRACELLULAR_STIMULUS	17.715	12.036	3.101	6.61	11.88	9.95	10.366	10.96	18.288	15.978	21.54		12.699	19.049	27.051	13.707	7.109	5.331	2.694	FOXK2;EHMT2;EIF4EBP1;TP53;FOS;ATG7;JUN;STAT1;RELA;LDHA;ULK1;MAPK8;MED1;SRC;DNMT3B;PTGS2;ITGA4		EGFR;RPS6KB1;CDKN1A;FOS;NCOA1;PRKAA1;RPTOR;DNMT3B;MTOR;TP53;JUN;MAP1LC3B;RELA	RPTOR;FOS;RELA;TP53	EGFR;RPTOR;NCOA1;RPS6KB1	NCOA1;PRKAA1;MAP1LC3A;PTEN;RPS6KB1;MTOR;FOXO1;CDKN1A;SIRT6	MAP1LC3B;BECN1;EIF4EBP1;DNMT3B;NCOA1;MED1;MTOR;MAPK8;EGFR;RPTOR;RELA;SIRT6;RPS6KB1;FOXO1		FOXO1;MAP1LC3A;SIRT6;RELA;RPTOR;MTOR;EGFR;RPS6KB1;CDKN1A;NCOA1;PTEN;PRKAA1		RPS6KB1;FOXO1;RPTOR;EGFR;MAPK8;MTOR;EIF4EBP1;MED1;BECN1;RELA;NCOA1;SIRT6	JUN;MTOR;MAP1LC3B;CDKN1A;RELA;PRKAA1;TP53;DNMT3B;EGFR;FOS	RELA;MAP1LC3A;TP53;EHMT2;ATG7;FOXO1;ULK1;STAT1;EGFR;ITGA4;LDHA;JUN;RPTOR;MAPK8;RPS6KB1;DNMT3B;NCOA1;MTOR;FOS;CDKN1A;FOXK2;PTGS2	TP53;FOS;RPTOR;RELA	PTGS2;EHMT2;TP53;FOS;RPS6KB1;FOXK2;LDHA;ITGA4;RELA;MAPK8;ATG7;EIF4EBP1;ULK1;SRC;JUN;STAT1;DNMT3B	TP53;STAT1;PRKAA1;LDHA;PTEN;NCOA1;MTOR;EHMT2;SIRT6;MAP1LC3A;FOXK2;EIF4EBP1;RPS6KB1;JUN;FOS;ATG7;PTGS2;MAPK8;DNMT3B;ITGA4;FOXO1;ULK1;CDKN1A;RELA;SRC		LDHA;STAT1;EIF4EBP1;ATG7;FOXK2;TP53;SRC;RPS6KB1;FOS;ULK1;DNMT3B;PTGS2;MAPK8;JUN	MAP1LC3A;RPS6KB1;TP53;PRKAA1;FOXK2;SRC;FOXO1;MED1;RPTOR;DNMT3B;PTGS2;EIF4EBP1;MTOR;ATG7;JUN;CDKN1A;NCOA1;FOS;MAPK8;STAT1;SIRT6;LDHA;ULK1	DNMT3B;NCOA1;FOXO1;PRKAA1;ITGA4;EIF4EBP1;SIRT6;MAP1LC3A;ATG7;CDKN1A;EHMT2;RPS6KB1;MTOR;FOS;MED1;RPTOR;MAPK8;RELA;SRC;PTGS2;EGFR;FOXK2;ULK1;STAT1;JUN;LDHA;PTEN;TP53	ATG7;RPTOR;STAT1;LDHA;DNMT3B;MAPK8;FOS;ULK1;FOXK2;TP53;RPS6KB1;PTGS2;RELA;EHMT2;ITGA4;JUN	RPTOR;MAP1LC3A;RPS6KB1;FOXO1;CDKN1A;PRKAA1;SIRT6;MED1;NCOA1;MTOR	MTOR;NCOA1;FOXO1;MAP1LC3A;CDKN1A;RPS6KB1;EGFR	MAP1LC3B;MED1;DNMT3B	17		13	4	4	9
GO_RESPONSE_TO_ACID_CHEMICAL	1.91	11.929	8.237	2.863	9.395	6.691	9.995	5.164	12.142	3.879	6.399		2.9	7.719	5.446	6.118	6.406	5.862		BAD;RELA		BAD;EGFR;PDGFRA;SOCS1;DNMT1;RPTOR;MTOR;BCL2L1;RELA	RPTOR;RELA;CHUK;BAD	EGFR;PDGFRA;BAD;RPTOR;BCL2L1;DNMT1	MTOR;PDGFRA;CDKN1B	CDKN1B;MTOR;CASP3;EGFR;DNMT1;RPTOR;RELA;BAD		BAD;RELA;RPTOR;CDKN1B;MTOR;EGFR		CASP3;CDKN1B;RPTOR;MTOR;EGFR;DNMT1;RELA;BAD	RELA;MTOR;EGFR;SOCS1	PDGFRA;BAD;RELA;CHUK;MTOR;CASP3;RPTOR;CDKN1B;EGFR;DNMT1;ZEB1	CHUK;RPTOR;RELA	BAD;CHUK;CASP3;RELA	MTOR;BAD;CHUK;CDKN1B;RELA;PDGFRA;CASP3		BAD;DNMT1;CASP3	BAD;DNMT1;CDKN1B;CASP3;ZEB1;PDGFRA;MTOR;RPTOR	MTOR;RELA;BAD;RPTOR;CDKN1B;EGFR	RPTOR;CHUK;BAD;CASP3;RELA;DNMT1	ZEB1;PDGFRA;RPTOR;BAD;CDKN1B;MTOR	MTOR;PDGFRA;CDKN1B;EGFR;ZEB1		2		9	4	6	3
GO_REGULATION_OF_CELLULAR_COMPONENT_MOVEMENT	4.017	11.87	7.955	7.886	9.073	9.743	8.15	4.961	11.214	5.576	13.543		5.231	14.639	13.732	5.018	9.966	7.254		ANXA1;JUN;PDGFRB;STAT5A;FGFR1;SRC;PTGS2;ITGA4		EGFR;PDGFRA;ERBB2;KIT;CAV1;MET;GATA3;ATM;STAT3;MTOR;ANXA1;ERBB3;JUN;ITGB1;IGF1R;STAT5A		EGFR;PDGFRA;GATA3;ATM;MET;STAT3;ERBB3;ERBB2;KIT;CAV1	CLDN1;PDGFRA;MET;ERBB2;RET;ITGA5;PTEN;MTOR;CDKN1B;ITGB1;KLF4;HDAC4;NOTCH1	KLF4;STAT3;CDKN1B;ATM;MTOR;KDR;EGFR;KIT;ITGB1;ILK;HDAC4;ERBB2;MET;ERBB3;CAV1		ILK;HDAC4;ITGA5;ERBB2;CAV1;CDKN1B;EGFR;MTOR;ATM;RET;PTEN;KLF4;MET;NOTCH1;ITGB1		ERBB3;CDKN1B;ERBB2;CAV1;MET;EGFR;MTOR;ILK;KDR;STAT3;HDAC4;KIT;ATM	JUN;ANXA1;STAT5A;MTOR;EGFR;IGF1R;ITGB1	HDAC4;PDGFRB;STAT5A;ITGA5;EGFR;NOTCH1;ITGA4;KLF4;KDR;JUN;KIT;STAT3;RET;ITGB1;PDGFRA;FGFR1;MET;MTOR;CDKN1B;ANXA1;PTGS2	ERBB2;CAV1	STAT5A;PTGS2;PDGFRB;KDR;ANXA1;ITGA4;STAT3;SRC;JUN;KIT;FGFR1	CLDN1;PDGFRB;HDAC4;RET;STAT5A;ITGB1;CDKN1B;PDGFRA;PTEN;MTOR;ERBB2;FGFR1;ITGA5;JUN;STAT3;KDR;NOTCH1;PTGS2;KLF4;MET;ITGA4;ANXA1;KIT;SRC		FGFR1;ANXA1;SRC;KIT;RET;KDR;PTGS2;PDGFRB;STAT5A;JUN	FGFR1;HDAC4;PDGFRB;KDR;CDKN1B;SRC;CAV1;CLDN1;ITGA5;GATA3;MET;PTGS2;KIT;STAT5A;MTOR;ERBB3;TWIST1;JUN;ANXA1;ITGB1;RET;KLF4;PDGFRA;ERBB2;NOTCH1	ERBB2;ATM;ILK;PDGFRB;HDAC4;ITGA4;ITGB1;FGFR1;ANXA1;MET;ITGA5;MTOR;CAV1;NOTCH1;SRC;RET;CDKN1B;PTGS2;EGFR;JUN;STAT5A;KLF4;PTEN	PDGFRB;FGFR1;KDR;STAT5A;PTGS2;ANXA1;STAT3;ITGA4;RET;KIT;JUN	PDGFRA;ERBB3;TWIST1;CDKN1B;ITGB1;RET;CAV1;ERBB2;NOTCH1;GATA3;MET;CLDN1;HDAC4;MTOR;ITGA5;KLF4	MTOR;NOTCH1;PDGFRA;HDAC4;ITGB1;EGFR;RET;KLF4;CDKN1B;ITGA5;MET		8		16		10	13
GO_RESPONSE_TO_KETONE	5.871	11.668	5.626	5.58	9.193	9.573	6.996	7.375	9.888	5.336	10.94		4.405	12.342	12.931	3.951	9.137	6.24	2.332	EIF4EBP1;FOS;SRC;BAD;DNMT3B;RELA		BAD;EGFR;CDKN1A;CAV1;FOS;NCOA1;PRKAA1;DNMT3B;BCL2L1;RELA	CAV1;FOS;RELA;BAD	EGFR;BAD;NCOA1;BCL2L1;CAV1	NCOA1;CLDN1;PRKAA1;FOXO1;CDKN1A;KLF4	KLF4;EIF4EBP1;DNMT3B;NCOA1;FOXO1;EGFR;RELA;CAV1;BAD		FOXO1;BAD;RELA;CAV1;EGFR;CDKN1A;NCOA1;KLF4;PRKAA1		FOXO1;BAD;CAV1;EGFR;EIF4EBP1;RELA;NCOA1	CDKN1A;RELA;PRKAA1;DNMT3B;EGFR;FOS	KLF4;FOXO1;NCOA1;BAD;CBX3;RELA;FOS;YAP1;CDKN1A;EGFR;DNMT3B	FOS;CAV1;RELA	FOS;RELA;BAD;EIF4EBP1;SRC;DNMT3B	NCOA1;BAD;DNMT3B;CLDN1;KLF4;FOXO1;CDKN1A;EIF4EBP1;PRKAA1;RELA;FOS;SRC		EIF4EBP1;BAD;SRC;FOS;DNMT3B	BAD;DNMT3B;AR;SRC;CDKN1A;FOXO1;NCOA1;CAV1;FOS;CLDN1;EIF4EBP1;KLF4;PRKAA1	CDKN1A;DNMT3B;NCOA1;FOXO1;CAV1;PRKAA1;SRC;RELA;EIF4EBP1;FOS;BAD;KLF4;EGFR	FOS;DNMT3B;BAD;CBX3;RELA	AR;CAV1;FOXO1;CDKN1A;PRKAA1;CLDN1;BAD;NCOA1;KLF4	NCOA1;FOXO1;EGFR;KLF4;CDKN1A;YAP1	KLF4;DNMT3B	6		10	4	5	6
GO_EPITHELIAL_CELL_PROLIFERATION	8.912	11.519	8.237	12.226	12.807	16.401	13.87	4.608	21.156	10.34	23.306		8.429	27.748	24.617	12.16	21.371	9.529		BRCA2;RB1;FGFR1;JUN;STAT1;BAD;ITGA4;MED1;STAT5A;MYC		BAD;EGFR;ERBB2;KIT;CAV1;GATA3;RPTOR;STAT3;MTOR;JUN;STAT6;STAT5A	RPTOR;CAV1;BAD;ERBB2	EGFR;GATA3;BAD;RPTOR;STAT3;ERBB2;KIT;CAV1	ESR1;CLDN1;BAX;SIRT6;ERBB2;PRKDC;PTEN;MTOR;CDKN1B;CTNNB1;NOTCH1;MAP2K1;STAT6	MED1;STAT3;RB1;CDKN1B;MTOR;KDR;EGFR;KIT;RPTOR;ERBB2;STAT6;SIRT6;CAV1;BAD		BAX;BAD;SIRT6;PRKDC;STAT6;ERBB2;RPTOR;CDKN1B;EGFR;MTOR;MAP2K1;PGR;PTEN;CTNNB1;NOTCH1;CAV1		CDKN1B;ERBB2;KIT;RPTOR;STAT6;CAV1;EGFR;MTOR;RB1;KDR;STAT3;MED1;BAD;SIRT6	JUN;STAT5A;MTOR;STAT6;EGFR	MAP2K1;STAT5A;PRKDC;YAP1;STAT1;EGFR;NOTCH1;STAT6;ITGA4;RB1;KDR;MYC;JUN;KIT;BRCA2;STAT3;RPTOR;ESR1;CTNNB1;FGFR1;BAD;MTOR;CDKN1B	ERBB2;CAV1;RPTOR	STAT5A;KDR;BRCA2;ITGA4;BAD;MYC;STAT3;JUN;KIT;FGFR1;STAT1;RB1	BRCA2;CLDN1;STAT5A;CDKN1B;STAT1;PTEN;CTNNB1;BAX;MTOR;SIRT6;PRKDC;ERBB2;MYC;FGFR1;JUN;STAT3;KDR;STAT6;NOTCH1;ESR1;BAD;RB1;MAP2K1;ITGA4;KIT		STAT1;BAD;STAT6;RB1;KIT;BRCA2;KDR;FGFR1;STAT5A;JUN	FGFR1;BAX;RB1;STAT6;KDR;ESR1;CDKN1B;AR;MAP2K1;CAV1;CLDN1;MED1;GATA3;RPTOR;TNFSF11;KIT;PRKDC;STAT5A;MTOR;BAD;TWIST1;JUN;CTNNB1;STAT1;BRCA2;SIRT6;ERBB2;NOTCH1	ERBB2;CTNNB1;ITGA4;SIRT6;MYC;FGFR1;PRKDC;MTOR;CAV1;MED1;RPTOR;PGR;NOTCH1;STAT6;MAP2K1;BRCA2;CDKN1B;EGFR;STAT1;BAX;JUN;BAD;STAT5A;PTEN;RB1	STAT6;RPTOR;STAT1;FGFR1;KDR;STAT5A;BAD;RB1;BRCA2;MYC;STAT3;ITGA4;KIT;JUN	ESR1;MAP2K1;CTNNB1;GATA3;NOTCH1;BAX;MED1;PRKDC;RPTOR;TWIST1;TNFSF11;SIRT6;CLDN1;BAD;AR;CAV1;ERBB2;STAT6;CDKN1B;MTOR	MTOR;NOTCH1;ESR1;STAT6;MAP2K1;PRKDC;CDKN1B;CTNNB1;EGFR;YAP1		10		12	4	8	13
GO_POSITIVE_REGULATION_OF_MOLECULAR_FUNCTION	6.003	11.453	6.857	13.51	20.926	15.49	18.889	5.348	19.708	9.575	23.742		5.426	22.911	19.634	8.534	19.573	11.783	3.658	PIK3CA;RB1;SMARCA4;FGFR1;JUN;KDM1A;PDGFRB;BAD;MAPK8;MED1;SRC;RELA;MYC		BAD;ERBB2;KIT;MTOR;ERBB3;ITGB1;IGF1R;PDGFRA;CAV1;MET;SOCS1;PRKAA1;GATA3;CDKN1A;RPTOR;STAT3;JUN;EGFR;RELA	RELA;CAV1;BAD;ERBB2;RPTOR;CHUK	EGFR;PDGFRA;GATA3;MET;BAD;RPTOR;STAT3;ERBB3;ERBB2;KIT;CAV1	BAX;MET;TSC2;ERBB2;BAK1;ITGB1;PDGFRA;PRKAA1;PTEN;MTOR;MAP2K6;CDKN1B;LRP6;ESR1;BRAF;RET;HDAC4;SHC1;CTNNB1;CDKN1A;KLF4;MAP2K1	TSC2;RB1;CTBP2;MAPK8;IKBKB;EGFR;HDAC4;MET;MED1;PIK3CA;LRP6;KDR;ITGB1;RELA;BAK1;KIT;ERBB2;ILK;EZH2;KLF4;STAT3;NCOA3;CDKN1B;MTOR;CASP3;RPTOR;ERBB3;CAV1;MAP2K6;BAD		CDKN1B;EGFR;TSC2;ITGB1;PRKAA1;CAV1;MAP2K6;RELA;MTOR;RET;PTEN;ILK;BAD;ERBB2;RPTOR;KLF4;MET;LRP6;BRAF;HDAC4;BAX;MAP2K1;CDKN1A;CTNNB1		CDKN1B;CTBP2;STAT3;RELA;KIT;BAD;MED1;LRP6;CASP3;ERBB3;TSC2;RB1;ERBB2;CAV1;MET;MAPK8;NCOA3;ILK;KDR;MAP2K6;RPTOR;EGFR;MTOR;PIK3CA;IKBKB;HDAC4	JUN;SOCS1;MTOR;CDKN1A;RELA;PRKAA1;EGFR;IGF1R;ITGB1	HDAC4;RELA;PDGFRB;MAP2K1;LRP6;CHUK;KDM1A;EGFR;SMARCA4;RB1;KLF4;IKBKB;BRAF;KDR;MYC;JUN;KIT;STAT3;CASP3;RPTOR;PIK3CA;RET;ESR1;MAPK8;ITGB1;NCOA3;CTNNB1;PDGFRA;FGFR1;MAP2K6;BAD;MET;TSC2;MTOR;CDKN1B;CDKN1A	ERBB2;RPTOR;CHUK;CAV1;RELA	KDM1A;CASP3;STAT3;SRC;KIT;NCOA3;FGFR1;RELA;MAPK8;BAD;JUN;ALK;PDGFRB;KDR;RB1;IKBKB;CHUK;PIK3CA;MYC	PDGFRB;NCOA3;HDAC4;BRAF;RET;ITGB1;KDM1A;CHUK;CDKN1B;PRKAA1;PDGFRA;PTEN;CTNNB1;CASP3;BAX;MTOR;MAP2K6;ERBB2;MYC;FGFR1;ALK;TSC2;JUN;KDR;STAT3;LRP6;IKBKB;SHC1;BAK1;PIK3CA;MAPK8;ESR1;BAD;RB1;KLF4;MAP2K1;MET;CDKN1A;RELA;KIT;SRC		IKBKB;PIK3CA;BAD;MAPK8;KIT;SRC;RB1;CASP3;RET;KDR;PDGFRB;FGFR1;JUN	BAX;EP300;LRP6;HDAC4;RB1;PDGFRB;KDR;PRKAA1;ESR1;CDKN1B;AR;SRC;TSC2;PIK3CA;MAP2K1;CAV1;MED1;GATA3;MET;RPTOR;TNFSF11;KIT;CASP3;MTOR;BAD;ERBB3;TWIST1;JUN;MAP2K6;CDKN1A;BRAF;CTNNB1;MAPK8;KLF4;ITGB1;RET;FGFR1;PDGFRA;ERBB2;IKBKB	ERBB2;CTNNB1;ILK;SMARCA4;PDGFRB;PRKAA1;HDAC4;BRAF;TSC2;ITGB1;MYC;FGFR1;CDKN1A;MET;KDM1A;MTOR;CAV1;MED1;RPTOR;PIK3CA;LRP6;MAPK8;RELA;MAP2K1;SRC;MAP2K6;RET;CDKN1B;EGFR;BAX;JUN;BAD;KLF4;PTEN;RB1	PIK3CA;KDR;BAD;RB1;RELA;KIT;IKBKB;MAPK8;STAT3;JUN;NCOA3;PDGFRB;KDM1A;CHUK;RPTOR;FGFR1;MYC;CASP3;RET	ESR1;MAP2K1;BRAF;CTNNB1;TSC2;CDKN1A;GATA3;MET;BAX;HDAC4;MED1;EP300;PDGFRA;RPTOR;LRP6;TWIST1;ERBB3;ITGB1;RET;TNFSF11;PRKAA1;BAD;KLF4;MAP2K6;AR;CAV1;ERBB2;CDKN1B;MTOR	MTOR;PDGFRA;ESR1;HDAC4;SMARCA4;MAP2K1;ITGB1;EGFR;RET;KLF4;BRAF;CDKN1B;LRP6;CTNNB1;CDKN1A;TSC2;MAP2K6;MET	ITGB1;MED1;EZH2;TSC2;KLF4;BAK1	13		19	6	11	22
GO_RESPONSE_TO_LIPID	8.105	11.368	5.943	12.914	16.583	17.678	13.23	6.309	19.611	8.875	22.351		6.571	23.607	23.959	8.122	19.102	12.442	4.651	EIF4EBP1;SMARCA4;ANXA1;FOS;PDGFRB;BAD;RELA;MAPK8;MED1;SRC;DNMT3B;PTGS2		BAD;EGFR;CDKN1A;CAV1;FOS;NCOA1;VIM;PRKAA1;ATM;DNMT3B;STAT3;SMAD2;ANXA1;GLDC;RELA	RELA;CAV1;FOS;BAD;CHUK	EGFR;SMAD2;ATM;BAD;NCOA1;GLDC;STAT3;CAV1	NCOA1;ESR1;CLDN1;IDH1;VIM;SMAD2;PRKAA1;RET;PTEN;CDKN1B;FOXO1;CTNNB1;KLF4;NOTCH1;CDKN1A;LRP6;NFKBIA	SMAD2;EIF4EBP1;DNMT3B;NCOA1;VIM;MAPK8;NFKBIA;EGFR;FOXO1;MED1;LRP6;RELA;EZH2;KLF4;STAT3;NCOA3;ATM;CDKN1B;CASP3;CAV1;BAD		CDKN1B;EGFR;PGR;NCOA1;CAV1;PRKAA1;NFKBIA;RELA;RET;PTEN;NOTCH1;FOXO1;BAD;KLF4;LRP6;SMAD2;VIM;ATM;CDKN1A;IDH1;CTNNB1		CASP3;CDKN1B;FOXO1;BAD;CAV1;EGFR;MAPK8;NCOA3;EIF4EBP1;MED1;SMAD2;STAT3;RELA;NCOA1;NFKBIA;ATM;LRP6	ANXA1;VIM;CDKN1A;RELA;PRKAA1;DNMT3B;EGFR;FOS	VIM;RELA;PDGFRB;LRP6;FOXO1;CHUK;NFKBIA;YAP1;EGFR;SMARCA4;NOTCH1;KLF4;STAT3;CASP3;RET;ESR1;MAPK8;NCOA3;DNMT3B;CTNNB1;NCOA1;BAD;CBX3;FOS;CDKN1B;CDKN1A;ANXA1;PTGS2	FOS;CAV1;CHUK;RELA	PTGS2;PDGFRB;FOS;ANXA1;CHUK;CASP3;RELA;MAPK8;BAD;EIF4EBP1;STAT3;SRC;NCOA3;DNMT3B	CLDN1;PDGFRB;NCOA3;NFKBIA;RET;CHUK;CDKN1B;PRKAA1;PTEN;CTNNB1;CASP3;VIM;NCOA1;EIF4EBP1;STAT3;FOS;LRP6;IDH1;NOTCH1;PTGS2;SMAD2;MAPK8;ESR1;BAD;DNMT3B;KLF4;FOXO1;CDKN1A;ANXA1;RELA;SRC		ANXA1;EIF4EBP1;BAD;SRC;MAPK8;FOS;DNMT3B;RET;PTGS2;PDGFRB;CASP3	EP300;LRP6;PDGFRB;PRKAA1;GLDC;ESR1;CDKN1B;AR;SRC;FOXO1;CAV1;HDAC1;CLDN1;MED1;DNMT3B;PTGS2;CASP3;EIF4EBP1;BAD;VIM;CDKN1A;NFKBIA;NCOA1;ANXA1;FOS;MAPK8;SMAD2;IDH1;CTNNB1;RET;KLF4;NOTCH1	DNMT3B;ATM;NCOA1;CTNNB1;FOXO1;SMARCA4;PDGFRB;PRKAA1;EIF4EBP1;CDKN1A;ANXA1;CAV1;FOS;MED1;PGR;NOTCH1;LRP6;IDH1;MAPK8;RELA;SRC;RET;VIM;CDKN1B;PTGS2;EGFR;SMAD2;NFKBIA;BAD;KLF4;PTEN	NCOA3;PDGFRB;FOS;MAPK8;DNMT3B;CHUK;BAD;PTGS2;CASP3;RELA;ANXA1;STAT3;CBX3;RET	ESR1;SMAD2;NCOA1;CTNNB1;GLDC;CDKN1A;NOTCH1;MED1;EP300;NFKBIA;LRP6;RET;FOXO1;PRKAA1;CLDN1;BAD;IDH1;VIM;KLF4;HDAC1;AR;CAV1;CDKN1B	NOTCH1;ESR1;NCOA1;FOXO1;SMARCA4;EGFR;RET;KLF4;VIM;CDKN1B;LRP6;CTNNB1;CDKN1A;YAP1;NFKBIA	SMAD2;MED1;EZH2;DNMT3B;KLF4;VIM	12		15	5	8	17
GO_RESPONSE_TO_REACTIVE_OXYGEN_SPECIES	11.273	11.286	4.132	7.925	11.701	9.239	8.108	8.786	19.194	13.363	21.809		12.303	17.398	18.188	12.589	7.466	7.393	3.368	ANXA1;JUN;FOS;PDGFRB;STAT1;BAD;LDHA;MAPK8;SRC;RELA		BAD;EGFR;PDGFRA;MET;FOS;PRKAA1;ANXA1;JUN;STAT6;RELA	RELA;FOS;CHUK;BAD	EGFR;MET;BAD;PDGFRA	PDGFRA;MET;PRKAA1;MAP1LC3A;FOXO1;BAK1;KLF4;STAT6	KLF4;FOXO1;BAK1;MAPK8;CASP3;EGFR;RELA;MET;STAT6;EZH2;BAD		FOXO1;MAP1LC3A;BAD;RELA;STAT6;EGFR;KLF4;MET;PRKAA1		CASP3;FOXO1;STAT6;MET;EGFR;MAPK8;RELA;BAD	JUN;ANXA1;RELA;PRKAA1;STAT6;EGFR;FOS	KLF4;FOXO1;PDGFRA;BAD;JUN;RELA;MAP1LC3A;CHUK;MET;CASP3;PDGFRB;FOS;EGFR;STAT1;MAPK8;ANXA1;STAT6;LDHA	FOS;CHUK;RELA	PDGFRB;FOS;ANXA1;LDHA;CASP3;CHUK;RELA;MAPK8;BAD;SRC;JUN;STAT1	PDGFRB;CHUK;STAT1;PRKAA1;LDHA;PDGFRA;CASP3;MAP1LC3A;JUN;FOS;STAT6;BAK1;MAPK8;BAD;KLF4;MET;FOXO1;ANXA1;RELA;SRC		LDHA;STAT1;ANXA1;BAD;STAT6;SRC;MAPK8;FOS;PDGFRB;CASP3;JUN	BAD;MAP1LC3A;JUN;SRC;CASP3;FOXO1;ANXA1;FOS;MAPK8;STAT6;PDGFRB;STAT1;KLF4;PDGFRA;LDHA;MET;PRKAA1	ANXA1;MET;FOXO1;STAT6;MAPK8;PDGFRB;PRKAA1;SRC;RELA;JUN;STAT1;BAD;MAP1LC3A;FOS;KLF4;LDHA;EGFR	STAT6;FOS;STAT1;LDHA;MAPK8;PDGFRB;CHUK;BAD;CASP3;RELA;ANXA1;JUN	PDGFRA;MAP1LC3A;FOXO1;PRKAA1;MET;BAD;STAT6;KLF4	PDGFRA;FOXO1;STAT6;KLF4;MAP1LC3A;EGFR;MET	EZH2;KLF4;BAK1	10		10	4	4	8
GO_RESPONSE_TO_PEPTIDE_HORMONE	9.996	11.286	2.324	9.385	10.024	10.537	10.932	9.976	15.495	14.078	22.842		12.078	17.65	19.937	10.684	7.579	6.814		STAT2;SMARCC1;PIK3CA;EIF4EBP1;ANXA1;SRC;STAT1;STAT5A;RELA;PTGS2;KAT2B		STAT6;RPS6KB1;CAV1;SOCS1;PRKAA1;STAT3;MTOR;STAT4;ANXA1;IGF1R;STAT5A;RELA	CAV1;RELA;CHUK	CAV1;RPS6KB1;STAT3	SHC1;PRKAA1;TSC2;PTEN;PRKDC;RPS6KB1;MTOR;CDKN1B;FOXO1;LRP6;STAT6	TSC2;EIF4EBP1;STAT3;PIK3CA;CDKN1B;LRP6;MTOR;RELA;RPS6KB1;STAT6;CAV1;FOXO1		FOXO1;RELA;STAT6;PRKDC;CAV1;CDKN1B;MTOR;RPS6KB1;PTEN;TSC2;LRP6;PRKAA1		RPS6KB1;CDKN1B;FOXO1;STAT6;CAV1;TSC2;MTOR;PIK3CA;EIF4EBP1;STAT3;RELA;LRP6	SOCS1;ANXA1;STAT5A;MTOR;STAT4;RELA;PRKAA1;STAT6;IGF1R	SMARCC1;RELA;KAT2B;STAT5A;LRP6;PRKDC;FOXO1;CHUK;STAT1;STAT6;STAT3;PIK3CA;RPS6KB1;TSC2;STAT2;MTOR;CDKN1B;ANXA1;PTGS2	CAV1;CHUK;RELA	STAT5A;SMARCC1;PTGS2;STAT2;RPS6KB1;ANXA1;CHUK;PIK3CA;RELA;KAT2B;EIF4EBP1;STAT3;SRC;STAT1;STAT4	STAT5A;CHUK;CDKN1B;STAT1;PRKAA1;PTEN;MTOR;STAT2;PRKDC;TSC2;EIF4EBP1;RPS6KB1;STAT3;STAT4;LRP6;STAT6;KAT2B;PTGS2;SHC1;PIK3CA;FOXO1;ANXA1;RELA;SMARCC1;SRC		STAT2;STAT1;ANXA1;EIF4EBP1;PIK3CA;STAT4;STAT6;SMARCC1;SRC;RPS6KB1;KAT2B;PTGS2;STAT5A	RPS6KB1;LRP6;STAT6;PRKAA1;CDKN1B;KAT2B;SRC;TSC2;PIK3CA;FOXO1;CAV1;STAT2;STAT4;PTGS2;PRKDC;STAT5A;EIF4EBP1;MTOR;SMARCC1;ANXA1;STAT1	FOXO1;PRKAA1;EIF4EBP1;TSC2;PRKDC;ANXA1;MTOR;CAV1;KAT2B;STAT2;SMARCC1;PIK3CA;LRP6;STAT6;RELA;SRC;CDKN1B;PTGS2;STAT1;STAT5A;RPS6KB1;PTEN	PIK3CA;STAT6;STAT1;SMARCC1;CHUK;STAT5A;KAT2B;RPS6KB1;PTGS2;RELA;ANXA1;STAT3;STAT2	PRKDC;LRP6;TSC2;RPS6KB1;FOXO1;CAV1;PRKAA1;STAT6;CDKN1B;MTOR	MTOR;FOXO1;STAT6;PRKDC;CDKN1B;LRP6;RPS6KB1;TSC2		11		12	3	3	11
GO_LYMPHOCYTE_ACTIVATION	3.193	11.158	5.363	6.194	8.562	8.109	7.394	5.645	8.632	4.944	11.073		4.456	13.189	10.01	4.49	10.643	5.256	1.435	PIK3CA;TP53;ANXA1;BAD;SRC;ITGA4		BAD;ERBB2;KIT;CDKN1A;CAV1;SOCS1;GATA3;ATM;STAT3;MTOR;ANXA1;TP53;ITGB1;STAT6	CAV1;BAD;TP53;ERBB2	GATA3;ATM;BAD;STAT3;ERBB2;KIT;CAV1	BAX;ERBB2;PRKDC;MTOR;BAK1;CTNNB1;ITGB1;HDAC4;CDKN1A;STAT6	STAT3;PIK3CA;ATM;MTOR;BAK1;CASP3;KIT;ITGB1;HDAC4;ERBB2;STAT6;CAV1;BAD		HDAC4;BAX;BAD;PRKDC;STAT6;ERBB2;MTOR;ATM;CDKN1A;CTNNB1;ITGB1;CAV1		CASP3;ERBB2;KIT;STAT6;CAV1;MTOR;PIK3CA;STAT3;HDAC4;BAD;ATM	SOCS1;ANXA1;MTOR;CDKN1A;STAT6;TP53;ITGB1	PRKDC;HDAC4;CTNNB1;BAD;KIT;STAT3;MTOR;CASP3;ITGB1;PIK3CA;ZEB1;CDKN1A;ANXA1;STAT6;TP53;ITGA4	TP53;ERBB2;CAV1	TP53;ANXA1;CASP3;PIK3CA;ITGA4;BAD;STAT3;SRC;KIT	HDAC4;ITGB1;TP53;CTNNB1;BAX;CASP3;MTOR;PRKDC;ERBB2;STAT3;STAT6;BAK1;PIK3CA;BAD;ITGA4;CDKN1A;ANXA1;KIT;SRC		ANXA1;PIK3CA;BAD;STAT6;TP53;SRC;KIT;CASP3	BAX;EP300;HDAC4;STAT6;TP53;ZEB1;SRC;PIK3CA;CAV1;GATA3;TNFSF11;KIT;CASP3;PRKDC;MTOR;BAD;CDKN1A;ANXA1;CTNNB1;ITGB1;ERBB2	CDKN1A;ERBB2;ANXA1;ATM;CTNNB1;STAT6;MTOR;CAV1;BAX;SRC;ITGA4;HDAC4;BAD;ITGB1;TP53;PRKDC;PIK3CA	PIK3CA;STAT6;TP53;BAD;CASP3;ANXA1;STAT3;ITGA4;KIT	CTNNB1;ZEB1;EP300;PRKDC;ITGB1;CAV1;ERBB2;CDKN1A;TNFSF11;BAX;GATA3;BAD;STAT6;MTOR;HDAC4	MTOR;HDAC4;ITGB1;STAT6;PRKDC;CTNNB1;CDKN1A;ZEB1	ITGB1;BAK1	6		14	4	7	10
GO_RESPONSE_TO_ORGANIC_CYCLIC_COMPOUND	12.422	11.145	5.841	15.002	16.301	17.34	13.035	6.205	23.811	14.188	29.107		9.397	28.047	28.617	10.878	20.006	13.513	4.651	CASP7;EIF4EBP1;SMARCA4;ANXA1;FOS;ATG7;KDM1A;PDGFRB;STAT1;RELA;BAD;LDHA;MED1;SRC;DNMT3B;PTGS2		BAD;EGFR;CDKN1A;CAV1;FOS;NCOA1;PRKAA1;DNMT3B;STAT3;MTOR;SMAD2;ANXA1;GLDC;BCL2L1;RELA	CAV1;FOS;RELA;BAD	EGFR;SMAD2;BAD;NCOA1;GLDC;STAT3;BCL2L1;CAV1	IDH1;MAP1LC3A;CHEK2;BAK1;NCOA1;CLDN1;SMAD2;PRKAA1;PTEN;MTOR;CDKN1B;LRP6;ESR1;FOXO1;NOTCH1;CTNNB1;CDKN1A;KLF4;NFKBIA	SMAD2;EIF4EBP1;DNMT3B;NCOA1;NFKBIA;EGFR;FOXO1;MED1;LRP6;RELA;CHEK2;BAK1;EZH2;KLF4;STAT3;NCOA3;CDKN1B;MTOR;CASP3;CAV1;BAD		MAP1LC3A;CDKN1B;EGFR;PGR;NCOA1;CAV1;PRKAA1;NFKBIA;CHEK2;RELA;MTOR;PTEN;NOTCH1;FOXO1;BAD;KLF4;LRP6;SMAD2;CDKN1A;IDH1;CTNNB1		CASP3;CDKN1B;FOXO1;BAD;CHEK2;CAV1;EGFR;MTOR;NCOA3;EIF4EBP1;MED1;STAT3;RELA;NCOA1;NFKBIA;LRP6;SMAD2	ANXA1;MTOR;CDKN1A;RELA;PRKAA1;DNMT3B;EGFR;FOS	RELA;MAP1LC3A;PDGFRB;LRP6;ATG7;FOXO1;NFKBIA;KDM1A;CHEK2;YAP1;STAT1;EGFR;SMARCA4;NOTCH1;LDHA;KLF4;CASP7;STAT3;CASP3;ESR1;DNMT3B;NCOA3;CTNNB1;NCOA1;BAD;CBX3;MTOR;FOS;CDKN1B;CDKN1A;ANXA1;PTGS2	FOS;CAV1;RELA	KDM1A;CASP3;CASP7;STAT3;SRC;CHEK2;NCOA3;STAT1;DNMT3B;LDHA;RELA;BAD;ATG7;EIF4EBP1;ALK;PDGFRB;FOS;ANXA1;PTGS2	CHEK2;CLDN1;PDGFRB;NCOA3;NFKBIA;KDM1A;CDKN1B;STAT1;PRKAA1;LDHA;PTEN;CTNNB1;CASP3;NCOA1;MTOR;MAP1LC3A;ALK;CASP7;EIF4EBP1;STAT3;FOS;LRP6;ATG7;IDH1;NOTCH1;PTGS2;BAK1;SMAD2;ESR1;BAD;DNMT3B;KLF4;FOXO1;CDKN1A;ANXA1;RELA;SRC		LDHA;STAT1;ANXA1;EIF4EBP1;ATG7;BAD;SRC;CASP7;FOS;DNMT3B;CHEK2;PTGS2;PDGFRB;CASP3	MAP1LC3A;EP300;LRP6;PDGFRB;CHEK2;PRKAA1;GLDC;ESR1;CDKN1B;AR;SRC;FOXO1;CAV1;HDAC1;CLDN1;MED1;DNMT3B;PTGS2;CASP3;EIF4EBP1;MTOR;BAD;ATG7;NFKBIA;CDKN1A;NCOA1;ANXA1;FOS;CTNNB1;SMAD2;IDH1;STAT1;KLF4;LDHA;CASP7;NOTCH1	DNMT3B;NCOA1;CTNNB1;FOXO1;SMARCA4;PDGFRB;PRKAA1;EIF4EBP1;MAP1LC3A;ATG7;CDKN1A;ANXA1;KDM1A;MTOR;CAV1;FOS;MED1;NOTCH1;PGR;LRP6;IDH1;RELA;SRC;KLF4;CASP7;CDKN1B;PTGS2;EGFR;SMAD2;STAT1;NFKBIA;BAD;LDHA;PTEN;CHEK2	ATG7;NCOA3;STAT1;LDHA;DNMT3B;FOS;PDGFRB;KDM1A;BAD;CHEK2;PTGS2;CASP3;RELA;ANXA1;STAT3;CBX3;CASP7	ESR1;SMAD2;NCOA1;CTNNB1;MAP1LC3A;GLDC;CDKN1A;NOTCH1;MED1;EP300;NFKBIA;LRP6;FOXO1;PRKAA1;CLDN1;BAD;CHEK2;IDH1;KLF4;HDAC1;AR;CAV1;CDKN1B;MTOR	MTOR;NOTCH1;ESR1;NCOA1;CHEK2;FOXO1;SMARCA4;EGFR;KLF4;CDKN1B;LRP6;CTNNB1;MAP1LC3A;CDKN1A;YAP1;NFKBIA	SMAD2;MED1;EZH2;DNMT3B;KLF4;BAK1	16		15	4	8	19
GO_GROWTH	10.033	11.077	5.819	9.218	10.499	11.208	9.537	6.177	15.748	7.658	17.262		6.384	18.443	22.104	6.93	11.453	8.583	2.927	PIK3CA;BRCA2;RB1;TP53;SMARCA4;FGFR1;ANXA1;SRC;PDGFRB;AURKA;ULK1;MED1;STAT5A;ITGA4		EGFR;ERBB2;CDKN1A;SOCS1;BCL2L1;GATA3;RPTOR;STAT3;ATM;MTOR;SMAD2;ANXA1;TP53;ITGB1;STAT5A	RPTOR;TP53;ERBB2	EGFR;GATA3;SMAD2;ATM;RPTOR;STAT3;ERBB2;BCL2L1	ESR1;SHC1;SMAD2;ERBB2;PRKDC;PTEN;MTOR;CDKN1B;CTNNB1;ITGB1;NOTCH1;CDKN1A;LRP6;SIRT6	SMAD2;MED1;STAT3;RB1;PIK3CA;ATM;CDKN1B;LRP6;MTOR;EGFR;ILK;ITGB1;RPTOR;ERBB2;SIRT6;EZH2		ILK;SIRT6;ERBB2;PRKDC;RPTOR;MTOR;CDKN1B;EGFR;ATM;CDKN1A;PTEN;CTNNB1;ITGB1;NOTCH1;LRP6;SMAD2		CDKN1B;ERBB2;RPTOR;EGFR;MTOR;PIK3CA;ILK;RB1;MED1;STAT3;SMAD2;SIRT6;ATM;LRP6	SOCS1;ANXA1;STAT5A;MTOR;CDKN1A;TP53;EGFR;ITGB1	PDGFRB;STAT5A;LRP6;TP53;PRKDC;ULK1;YAP1;AURKA;EGFR;SMARCA4;NOTCH1;ITGA4;RB1;BRCA2;STAT3;RPTOR;PIK3CA;ESR1;ITGB1;CTNNB1;FGFR1;MTOR;CDKN1B;CDKN1A;ANXA1	TP53;ERBB2;RPTOR	STAT5A;PDGFRB;TP53;ANXA1;BRCA2;PIK3CA;ITGA4;ULK1;STAT3;SRC;AURKA;FGFR1;RB1	AURKA;BRCA2;PDGFRB;STAT5A;ITGB1;TP53;CDKN1B;PTEN;CTNNB1;MTOR;SIRT6;PRKDC;ERBB2;FGFR1;STAT3;LRP6;NOTCH1;SHC1;PIK3CA;SMAD2;ESR1;RB1;ITGA4;ULK1;CDKN1A;ANXA1;SRC		FGFR1;ANXA1;PIK3CA;TP53;RB1;SRC;ULK1;BRCA2;AURKA;PDGFRB;STAT5A	FGFR1;EP300;LRP6;RB1;TP53;PDGFRB;ESR1;CDKN1B;AR;SRC;PIK3CA;NOTCH1;MED1;GATA3;RPTOR;PRKDC;AURKA;STAT5A;MTOR;CDKN1A;ANXA1;CTNNB1;SMAD2;ITGB1;BRCA2;SIRT6;ERBB2;ULK1	ERBB2;ATM;CTNNB1;ILK;SMARCA4;PDGFRB;ITGA4;SIRT6;ITGB1;FGFR1;PRKDC;CDKN1A;ANXA1;MTOR;MED1;RPTOR;PIK3CA;NOTCH1;LRP6;SRC;AURKA;BRCA2;CDKN1B;EGFR;SMAD2;ULK1;STAT5A;PTEN;TP53;RB1	PIK3CA;RPTOR;PDGFRB;ULK1;FGFR1;STAT5A;TP53;RB1;BRCA2;STAT3;ANXA1;ITGA4;AURKA	CTNNB1;ESR1;EP300;PRKDC;RPTOR;LRP6;ITGB1;AR;ERBB2;CDKN1A;SMAD2;NOTCH1;GATA3;SIRT6;MED1;CDKN1B;MTOR	MTOR;NOTCH1;ESR1;ITGB1;SMARCA4;EGFR;PRKDC;CDKN1B;LRP6;CTNNB1;CDKN1A;YAP1	MED1;EZH2;ITGB1;SMAD2	14		15	3	8	14
GO_REGULATION_OF_CELL_CYCLE	13.393	10.992	5.258	14.64	16.768	16.818	12.752	6.631	25.666	14.86	28.233		13.643	26.047	31.723	15.749	13.232	10.961	5.249	EHMT2;CCNC;BRCA2;RB1;TP53;FGFR1;ANXA1;JUN;RRM2;PDGFRB;AURKA;MKI67;MED1;SRC;EIF4EBP1;PTGS2;MYC;KAT2B		EGFR;RPS6KB1;CDKN1A;PRKAA1;GATA3;RPTOR;STAT3;ATM;MTOR;TP53;ITGB1;ANXA1;CHEK1;JUN;PRKAB1;BCL2L1	RPTOR;CHEK1;ATR;TP53	EGFR;GATA3;ATM;CHEK1;RPS6KB1;RPTOR;STAT3;BCL2L1	BAX;TSC2;ATR;CHEK2;PRKDC;BAK1;ITGB1;PRKAA1;PTEN;MTOR;MAP2K6;CDKN1B;LRP6;NOTCH1;RPS6KB1;CTNNB1;CDKN1A;KLF4;MAP2K1;CHEK1	TSC2;BECN1;EIF4EBP1;EGFR;MED1;LRP6;ITGB1;CHEK2;RPS6KB1;BAK1;ILK;PRKAB1;EZH2;KLF4;CHEK1;STAT3;ATM;CDKN1B;MTOR;CASP3;RPTOR;RB1;MAP2K6		CDKN1B;EGFR;TSC2;ITGB1;PRKAA1;CHEK2;MAP2K6;MTOR;PTEN;CHEK1;NOTCH1;ILK;PRKDC;RPTOR;KLF4;LRP6;BAX;MAP2K1;ATM;RPS6KB1;CDKN1A;CTNNB1		RPS6KB1;CASP3;CDKN1B;CHEK1;MAP2K6;RPTOR;CHEK2;TSC2;EGFR;MTOR;ILK;EIF4EBP1;RB1;STAT3;BECN1;MED1;ATM;LRP6	JUN;ANXA1;MTOR;PRKAB1;CDKN1A;PRKAA1;TP53;EGFR;ITGB1	PDGFRB;MAP2K1;CHEK1;KAT2B;LRP6;TP53;EHMT2;PRKDC;CHEK2;AURKA;EGFR;NOTCH1;RB1;RRM2;KLF4;MYC;JUN;BRCA2;STAT3;CASP3;CCNC;RPTOR;ITGB1;RPS6KB1;CTNNB1;MAP2K6;FGFR1;CBX3;TSC2;MTOR;MKI67;ATR;CDKN1B;CDKN1A;ANXA1;PTGS2	TP53;CHEK1;ATR;RPTOR	RRM2;TP53;MKI67;CASP3;STAT3;SRC;CHEK2;FGFR1;EHMT2;BRCA2;RPS6KB1;EIF4EBP1;CCNC;AURKA;JUN;PDGFRB;ANXA1;KAT2B;RB1;PTGS2;MYC	AURKA;ATR;CHEK2;BRCA2;PDGFRB;CHEK1;ITGB1;TP53;CDKN1B;PRKAA1;PTEN;CTNNB1;CASP3;BAX;MTOR;EHMT2;PRKDC;MAP2K6;MYC;FGFR1;TSC2;EIF4EBP1;RPS6KB1;JUN;STAT3;LRP6;KAT2B;NOTCH1;PTGS2;BAK1;RRM2;MKI67;RB1;KLF4;MAP2K1;CDKN1A;ANXA1;CCNC;SRC		CHEK1;KAT2B;PTGS2;CCNC;CHEK2;CASP3;RPS6KB1;AURKA;FGFR1;PDGFRB;JUN;ANXA1;EIF4EBP1;MKI67;BRCA2;TP53;SRC;RB1;RRM2	RPS6KB1;FGFR1;BAX;EP300;LRP6;CHEK1;RB1;CCNC;PDGFRB;TP53;CHEK2;PRKAA1;MKI67;CDKN1B;KAT2B;SRC;TSC2;MAP2K1;MED1;GATA3;RPTOR;RRM2;PTGS2;CASP3;PRKDC;AURKA;EIF4EBP1;MTOR;JUN;MAP2K6;CDKN1A;ANXA1;CTNNB1;ITGB1;BRCA2;KLF4;NOTCH1	ATM;CTNNB1;ILK;PDGFRB;PRKAA1;EIF4EBP1;TSC2;ITGB1;MYC;FGFR1;PRKDC;CDKN1A;ANXA1;EHMT2;RPS6KB1;MTOR;MED1;KAT2B;RPTOR;NOTCH1;LRP6;SRC;MAP2K1;CCNC;MKI67;BRCA2;MAP2K6;AURKA;CDKN1B;CHEK1;PTGS2;EGFR;RRM2;BAX;CHEK2;JUN;KLF4;PTEN;TP53;RB1	RB1;PTGS2;ANXA1;MKI67;RRM2;CHEK2;CHEK1;ATR;STAT3;JUN;PDGFRB;CCNC;BRCA2;CBX3;RPTOR;FGFR1;KAT2B;TP53;MYC;RPS6KB1;CASP3;AURKA;EHMT2	MAP2K1;CTNNB1;TSC2;CDKN1A;NOTCH1;GATA3;BAX;MED1;EP300;PRKDC;RPTOR;LRP6;ITGB1;PRKAA1;CHEK2;KLF4;MAP2K6;RPS6KB1;CDKN1B;MTOR	MTOR;NOTCH1;CHEK2;ITGB1;MAP2K1;PRKDC;KLF4;CDKN1B;LRP6;CTNNB1;MAP2K6;TSC2;RPS6KB1;EGFR;CDKN1A	ITGB1;MED1;EZH2;TSC2;KLF4;PRKAB1;BAK1	18		16	4	8	20
GO_CELLULAR_RESPONSE_TO_REACTIVE_OXYGEN_SPECIES	7.847	10.974	3.323	7.5	8.548	8.923	6.243	9.713	15.33	8.608	16.576		7.516	13.624	15.762	8.181	7.109	8.274	2.483	ANXA1;FOS;JUN;PDGFRB;MAPK8;SRC;RELA		EGFR;PDGFRA;FOS;MET;PRKAA1;ANXA1;JUN;STAT6;RELA	RELA;FOS;CHUK	EGFR;MET;PDGFRA	PDGFRA;MET;PRKAA1;MAP1LC3A;FOXO1;KLF4;STAT6	KLF4;MAPK8;EGFR;RELA;MET;STAT6;EZH2;FOXO1		FOXO1;MAP1LC3A;RELA;STAT6;EGFR;KLF4;MET;PRKAA1		FOXO1;STAT6;MET;EGFR;MAPK8;RELA	JUN;ANXA1;RELA;PRKAA1;STAT6;EGFR;FOS	KLF4;FOXO1;PDGFRA;JUN;MET;RELA;MAP1LC3A;CHUK;PDGFRB;FOS;EGFR;MAPK8;ANXA1;STAT6	FOS;CHUK;RELA	PDGFRB;FOS;ANXA1;CHUK;RELA;MAPK8;SRC;JUN	MAP1LC3A;STAT6;PDGFRB;KLF4;MET;FOXO1;CHUK;MAPK8;ANXA1;PRKAA1;JUN;RELA;PDGFRA;FOS;SRC		PDGFRB;ANXA1;STAT6;SRC;FOS;MAPK8;JUN	MAP1LC3A;JUN;SRC;FOXO1;ANXA1;FOS;MAPK8;STAT6;PDGFRB;KLF4;PDGFRA;PRKAA1;MET	ANXA1;MET;FOXO1;STAT6;MAPK8;PDGFRB;PRKAA1;SRC;RELA;JUN;MAP1LC3A;FOS;KLF4;EGFR	STAT6;PDGFRB;FOS;MAPK8;CHUK;RELA;ANXA1;JUN	PDGFRA;MAP1LC3A;FOXO1;PRKAA1;MET;STAT6;KLF4	PDGFRA;FOXO1;STAT6;KLF4;MAP1LC3A;EGFR;MET	EZH2;KLF4	7		9	3	3	7
GO_NEURON_DEATH	5.787	10.904	5.875	3.436	8.463	6.498	9.247	4.905	8.608	7.384	10.575		6.614	11.815	11.259	6.871	6.113	2.108		PIK3CA;RB1;TP53;FOS;ATG7;JUN;BAD		BAD;AKT1S1;FOS;ATM;GATA3;STAT3;MTOR;TP53;ERBB3;JUN;BCL2L1	FOS;BAD;TP53	GATA3;ATM;BAD;STAT3;ERBB3;BCL2L1	BAX;MTOR;CTNNB1;AKT1S1;HDAC4	STAT3;RB1;PIK3CA;ATM;MTOR;CASP3;ILK;HDAC4;ERBB3;BAD		ILK;HDAC4;BAX;BAD;MTOR;AKT1S1;ATM;CTNNB1		CASP3;ERBB3;MTOR;PIK3CA;ILK;RB1;STAT3;HDAC4;BAD;ATM	JUN;MTOR;TP53;FOS;AKT1S1	HDAC4;CTNNB1;BAD;JUN;STAT3;MTOR;CASP3;FOS;PIK3CA;TP53;RB1;ATG7	TP53;FOS	TP53;FOS;CASP3;PIK3CA;BAD;ATG7;STAT3;JUN;RB1	MTOR;BAD;RB1;ATG7;BAX;HDAC4;AKT1S1;TP53;CTNNB1;PIK3CA;JUN;STAT3;FOS;CASP3		ATG7;PIK3CA;BAD;TP53;RB1;FOS;CASP3;JUN	BAD;ERBB3;BAX;JUN;ATG7;CASP3;PIK3CA;HDAC4;RB1;FOS;CTNNB1;TP53;AKT1S1;GATA3;MTOR	ATM;CTNNB1;ILK;MTOR;FOS;HDAC4;BAX;JUN;BAD;PIK3CA;ATG7;AKT1S1;TP53;RB1	ATG7;PIK3CA;FOS;BAD;RB1;TP53;CASP3;STAT3;JUN	CTNNB1;ERBB3;AKT1S1;GATA3;BAX;BAD;HDAC4;MTOR	MTOR;HDAC4;CTNNB1		7		11	3	6	5
GO_IMMUNE_SYSTEM_DEVELOPMENT	8.791	10.904	4.714	12.345	11.359	11.015	9.378	6.085	23.252	10.496	23.594		10.264	26.195	19.434	11.632	18.365	13.242	2.907	RB1;BRCA2;TP53;ANXA1;FOS;JUN;STAT1;BAD;ITGA4;MED1;SRC;MYC;KAT2B		BAD;PDGFRA;ERBB2;KIT;FOS;SOCS1;GATA3;ATM;STAT3;MTOR;TP53;ANXA1;JUN;ITGB1;STAT6	FOS;BAD;TP53;ERBB2	PDGFRA;GATA3;ATM;BAD;STAT3;ERBB2;KIT	BAX;CREBBP;PDGFRA;ERBB2;RET;PRKDC;ASH2L;BAK1;MTOR;ITGB1;KLF4;MAP2K1;HDAC4;NOTCH1;CTNNB1;STAT6;NFKBIA	KLF4;MED1;STAT3;ATM;MTOR;CREBBP;NFKBIA;KDR;BAK1;KIT;CASP3;ITGB1;HDAC4;ERBB2;STAT6;RB1;BAD		HDAC4;BAX;BAD;PRKDC;STAT6;ERBB2;MAP2K1;MTOR;CREBBP;ATM;RET;CTNNB1;KLF4;NOTCH1;ITGB1;NFKBIA		CASP3;CREBBP;ERBB2;KIT;STAT6;MTOR;RB1;KDR;STAT3;HDAC4;MED1;BAD;NFKBIA;ATM	JUN;SOCS1;ANXA1;MTOR;STAT6;TP53;FOS;ITGB1	HDAC4;MAP2K1;KAT2B;TP53;PRKDC;NFKBIA;YAP1;CREBBP;STAT1;NOTCH1;STAT6;ITGA4;ZEB1;RB1;KLF4;KDR;MYC;JUN;KIT;BRCA2;STAT3;CASP3;RET;ITGB1;CTNNB1;PDGFRA;SETD1A;BAD;MTOR;FOS;ASH2L;ANXA1	TP53;FOS;ERBB2	TP53;KDR;FOS;ANXA1;BRCA2;CASP3;ITGA4;KAT2B;BAD;MYC;STAT3;SRC;STAT1;JUN;KIT;RB1	BRCA2;HDAC4;NFKBIA;ITGB1;RET;TP53;STAT1;PDGFRA;CTNNB1;CASP3;BAX;MTOR;PRKDC;ERBB2;MYC;CREBBP;JUN;STAT3;KDR;FOS;ASH2L;STAT6;KAT2B;NOTCH1;BAK1;BAD;RB1;KLF4;MAP2K1;ITGA4;ANXA1;KIT;SRC		STAT1;ANXA1;BAD;STAT6;TP53;SRC;KIT;RB1;FOS;BRCA2;KAT2B;KDR;RET;CASP3;JUN	BAX;EP300;HDAC4;RB1;STAT6;TP53;KDR;ZEB1;CREBBP;KAT2B;SRC;MAP2K1;ASH2L;HDAC1;MED1;GATA3;TNFSF11;KIT;CASP3;PRKDC;BRCA2;MTOR;BAD;JUN;NFKBIA;ANXA1;FOS;CTNNB1;ITGB1;STAT1;RET;KLF4;PDGFRA;ERBB2;NOTCH1	ERBB2;ATM;CTNNB1;HDAC4;ITGA4;ITGB1;MYC;PRKDC;ANXA1;MTOR;FOS;MED1;KAT2B;CREBBP;NOTCH1;STAT6;SRC;MAP2K1;BRCA2;RET;STAT1;BAX;JUN;NFKBIA;BAD;KLF4;TP53;RB1	STAT6;FOS;STAT1;KDR;KAT2B;BAD;RB1;BRCA2;TP53;MYC;CASP3;SETD1A;ANXA1;STAT3;ITGA4;RET;KIT;JUN	MAP2K1;CTNNB1;BAX;GATA3;NOTCH1;HDAC4;MED1;ASH2L;EP300;NFKBIA;PDGFRA;PRKDC;ITGB1;RET;TNFSF11;BAD;KLF4;ZEB1;HDAC1;CREBBP;ERBB2;STAT6;MTOR	MTOR;ASH2L;NOTCH1;PDGFRA;HDAC4;STAT6;MAP2K1;CREBBP;ITGB1;RET;PRKDC;KLF4;CTNNB1;YAP1;ZEB1;NFKBIA	MED1;KLF4;BAK1;ITGB1	13		15	4	7	17
GO_POSITIVE_REGULATION_OF_TRANSCRIPTION_BY_RNA_POLYMERASE_II	11.044	10.903	5.214	9.035	13.224	10.883	13.709	6.581	27.811	13.651	23.29		8.199	25.792	21.687	13.406	17.807	14.578	1.896	FOXK2;STAT2;SMARCC1;CCNC;RB1;TP53;SMARCA4;FOS;JUN;KDM1A;STAT1;MED1;STAT5A;RELA;MYC;KAT2B		STAT6;EGFR;HDAC3;FOS;MET;NCOA1;GATA3;ATM;STAT3;SMAD2;TP53;JUN;SQSTM1;STAT4;STAT5A;RELA	RELA;FOS;SQSTM1;CHUK;TP53	EGFR;SMAD2;GATA3;ATM;MET;NCOA1;STAT3;HDAC3	NCOA1;ESR1;MET;CREBBP;SMAD2;PRKDC;ASH2L;FOXO1;CTNNB1;HDAC4;KLF4;NOTCH1;LRP6;STAT6;NFKBIA	SMAD2;NCOA1;CTBP2;NFKBIA;IKBKB;EGFR;HDAC4;MET;FOXO1;MED1;LRP6;CREBBP;RELA;STAT6;KLF4;STAT3;NCOA3;ATM;RB1;HDAC3		FOXO1;HDAC4;RELA;STAT6;PRKDC;EGFR;CREBBP;ATM;PGR;NCOA1;CTNNB1;KLF4;MET;NOTCH1;LRP6;SMAD2;NFKBIA		CTBP2;STAT3;RELA;MED1;CREBBP;LRP6;HDAC3;RB1;STAT6;MET;NCOA3;ATM;FOXO1;EGFR;IKBKB;HDAC4;NCOA1;NFKBIA;SMAD2	JUN;STAT5A;STAT4;RELA;STAT6;TP53;EGFR;FOS;SQSTM1	HDAC4;SMARCC1;RELA;KAT2B;STAT5A;LRP6;TP53;PRKDC;FOXO1;CHUK;NFKBIA;KDM1A;YAP1;CREBBP;STAT1;EGFR;SMARCA4;NOTCH1;STAT6;ZEB1;RB1;KLF4;IKBKB;MYC;JUN;STAT3;CCNC;ESR1;SQSTM1;NCOA3;HDAC3;CTNNB1;NCOA1;MET;STAT2;FOS;ASH2L;FOXK2	FOS;TP53;CHUK;RELA;SQSTM1	STAT5A;KDM1A;TP53;HDAC3;STAT3;NCOA3;STAT1;STAT4;STAT2;RELA;CCNC;JUN;SMARCC1;FOS;FOXK2;KAT2B;RB1;IKBKB;CHUK;MYC	NCOA3;HDAC4;NFKBIA;STAT5A;TP53;CHUK;STAT1;HDAC3;CTNNB1;NCOA1;STAT2;PRKDC;FOXK2;MYC;CREBBP;JUN;STAT3;FOS;STAT4;LRP6;ASH2L;STAT6;IKBKB;KAT2B;NOTCH1;SMAD2;ESR1;RB1;KLF4;MET;FOXO1;RELA;CCNC;SMARCC1;KDM1A		IKBKB;STAT2;STAT1;STAT4;STAT6;FOXK2;SMARCC1;TP53;RB1;FOS;KAT2B;CCNC;STAT5A;JUN	EP300;LRP6;HDAC4;RB1;STAT6;CCNC;TP53;ZEB1;FOXK2;ESR1;CREBBP;KAT2B;AR;SQSTM1;ASH2L;FOXO1;HDAC1;STAT2;MED1;GATA3;MET;STAT4;TNFSF11;PRKDC;STAT5A;SMARCC1;TWIST1;JUN;NFKBIA;NCOA1;FOS;CTNNB1;SMAD2;STAT1;KLF4;IKBKB;NOTCH1	ATM;NCOA1;CTNNB1;FOXO1;SMARCA4;HDAC4;MYC;PRKDC;MET;KDM1A;FOS;MED1;KAT2B;CREBBP;STAT2;SMARCC1;NOTCH1;PGR;LRP6;STAT6;RELA;CCNC;EGFR;FOXK2;SMAD2;STAT1;JUN;NFKBIA;STAT5A;KLF4;TP53;RB1	RB1;RELA;SQSTM1;FOXK2;IKBKB;STAT1;STAT3;JUN;STAT6;NCOA3;FOS;KDM1A;SMARCC1;CCNC;CHUK;STAT5A;KAT2B;TP53;MYC;HDAC3;STAT2	ESR1;SMAD2;NCOA1;SQSTM1;CTNNB1;NOTCH1;GATA3;MET;HDAC4;MED1;ASH2L;EP300;NFKBIA;PRKDC;LRP6;TWIST1;FOXO1;TNFSF11;KLF4;ZEB1;HDAC1;AR;CREBBP;STAT6	ASH2L;NOTCH1;ESR1;NCOA1;FOXO1;HDAC4;STAT6;SMARCA4;CREBBP;PRKDC;KLF4;LRP6;CTNNB1;MET;EGFR;YAP1;ZEB1;NFKBIA	MED1;KLF4;SMAD2	16		16	5	8	15
GO_T_CELL_DIFFERENTIATION	2.27	10.769	5.214	3.984	4.757	5.036	5.172	5.428	7.74	3.811	7.536		4.013	8.73	5.781	4.539	7.062	4.498		BAD;TP53;ANXA1		BAD;ERBB2;KIT;SOCS1;GATA3;STAT3;MTOR;ANXA1;TP53;STAT6	BAD;TP53;ERBB2	GATA3;BAD;STAT3;ERBB2;KIT	ERBB2;PRKDC;MTOR;CTNNB1;STAT6	STAT3;MTOR;KIT;ERBB2;STAT6;BAD		BAD;PRKDC;STAT6;ERBB2;MTOR;CTNNB1		ERBB2;KIT;STAT6;MTOR;STAT3;BAD	SOCS1;ANXA1;MTOR;STAT6;TP53	PRKDC;CTNNB1;BAD;KIT;STAT3;MTOR;ANXA1;STAT6;TP53;ZEB1	TP53;ERBB2	TP53;ANXA1;BAD;STAT3;KIT	MTOR;BAD;PRKDC;STAT6;ERBB2;TP53;ANXA1;STAT3;CTNNB1;KIT		ANXA1;BAD;STAT6;TP53;KIT	BAD;KIT;ANXA1;CTNNB1;PRKDC;STAT6;TP53;ZEB1;ERBB2;GATA3;MTOR	ERBB2;ANXA1;CTNNB1;STAT6;MTOR;BAD;TP53;PRKDC	STAT6;TP53;BAD;STAT3;ANXA1;KIT	CTNNB1;ZEB1;PRKDC;ERBB2;GATA3;BAD;STAT6;MTOR	MTOR;STAT6;PRKDC;CTNNB1;ZEB1		3		10	3	5	5
GO_POSITIVE_REGULATION_OF_CATALYTIC_ACTIVITY	3.15	10.767	6.608	13.011	13.801	13.887	11.276	5.03	13.546	5.711	18.544		4.783	16.758	15.224	5.062	13.662	9.771	3.196	PIK3CA;JUN;PDGFRB;BAD;MAPK8;FGFR1;SRC;MYC		BAD;EGFR;PDGFRA;ERBB2;KIT;CAV1;CDKN1A;MET;SOCS1;PRKAA1;RPTOR;STAT3;MTOR;ERBB3;JUN;ITGB1;IGF1R	RPTOR;CAV1;BAD;ERBB2	EGFR;PDGFRA;MET;BAD;RPTOR;STAT3;ERBB3;ERBB2;KIT;CAV1	BAX;MET;TSC2;ERBB2;BAK1;ITGB1;PDGFRA;PRKAA1;PTEN;MTOR;MAP2K6;CDKN1B;ESR1;BRAF;RET;SHC1;CTNNB1;CDKN1A;KLF4;MAP2K1	TSC2;MAPK8;EGFR;MET;PIK3CA;KDR;ITGB1;BAK1;KIT;ERBB2;ILK;EZH2;KLF4;STAT3;CDKN1B;MTOR;CASP3;RPTOR;ERBB3;CAV1;MAP2K6;BAD		CDKN1B;EGFR;TSC2;ITGB1;PRKAA1;CAV1;MAP2K6;MTOR;RET;PTEN;ILK;BAD;ERBB2;RPTOR;KLF4;MET;BRAF;BAX;MAP2K1;CDKN1A;CTNNB1		CASP3;ERBB3;CDKN1B;ERBB2;MAP2K6;RPTOR;KIT;CAV1;MET;TSC2;MAPK8;EGFR;MTOR;ILK;PIK3CA;KDR;STAT3;BAD	JUN;SOCS1;MTOR;CDKN1A;PRKAA1;EGFR;IGF1R;ITGB1	PDGFRB;MAP2K1;EGFR;KLF4;BRAF;KDR;MYC;JUN;KIT;STAT3;CASP3;RPTOR;PIK3CA;RET;ESR1;MAPK8;ITGB1;CTNNB1;PDGFRA;FGFR1;MAP2K6;BAD;MET;TSC2;MTOR;CDKN1B;CDKN1A	ERBB2;CAV1;RPTOR	PDGFRB;KDR;CASP3;PIK3CA;MAPK8;BAD;MYC;STAT3;SRC;JUN;ALK;KIT;FGFR1	PDGFRB;BRAF;ITGB1;RET;CDKN1B;PRKAA1;PDGFRA;PTEN;CTNNB1;CASP3;BAX;MTOR;MAP2K6;ERBB2;MYC;FGFR1;ALK;TSC2;JUN;KDR;STAT3;SHC1;BAK1;PIK3CA;MAPK8;ESR1;BAD;KLF4;MAP2K1;MET;CDKN1A;KIT;SRC		PIK3CA;BAD;MAPK8;KIT;SRC;CASP3;RET;KDR;PDGFRB;FGFR1;JUN	FGFR1;BAX;PDGFRB;KDR;PRKAA1;ESR1;CDKN1B;SRC;TSC2;PIK3CA;MAP2K1;CAV1;RPTOR;TNFSF11;KIT;CASP3;MTOR;BAD;ERBB3;JUN;MAP2K6;CDKN1A;BRAF;CTNNB1;MAPK8;KLF4;ITGB1;RET;MET;PDGFRA;ERBB2	ERBB2;CTNNB1;ILK;PDGFRB;PRKAA1;BRAF;TSC2;ITGB1;MYC;FGFR1;CDKN1A;MET;MTOR;CAV1;RPTOR;PIK3CA;MAPK8;SRC;MAP2K1;MAP2K6;RET;CDKN1B;EGFR;BAX;JUN;BAD;KLF4;PTEN	PIK3CA;RPTOR;PDGFRB;MAPK8;FGFR1;KDR;BAD;MYC;CASP3;STAT3;RET;KIT;JUN	ESR1;MAP2K1;BRAF;CTNNB1;TSC2;CDKN1A;BAX;MET;PDGFRA;RPTOR;ERBB3;ITGB1;RET;TNFSF11;PRKAA1;BAD;KLF4;MAP2K6;CAV1;ERBB2;CDKN1B;MTOR	MTOR;PDGFRA;ESR1;ITGB1;MAP2K1;EGFR;RET;KLF4;BRAF;CDKN1B;CTNNB1;CDKN1A;TSC2;MAP2K6;MET	ITGB1;EZH2;TSC2;KLF4;BAK1	8		17	4	10	20
GO_PROTEIN_KINASE_B_SIGNALING	3.204	10.753	8.083	10.203	12.511	10.107	10.454	4.146	12.615	4.844	14.931		6.286	17.8	13.005	4.523	12.385	9.84	3.255	PDGFRB;FGFR1;SRC;PIK3CA		EGFR;PDGFRA;ERBB2;KIT;MET;GATA3;MTOR;ERBB3;ITGB1;IGF1R		EGFR;PDGFRA;GATA3;MET;ERBB3;ERBB2;KIT	ESR1;PDGFRA;MET;TSC2;ERBB2;RET;PTEN;MTOR;ITGB1;KLF4	TSC2;KLF4;PIK3CA;MTOR;KDR;EGFR;KIT;ITGB1;ILK;ERBB2;MET;ERBB3		ILK;KLF4;ERBB2;MTOR;EGFR;RET;PTEN;TSC2;ITGB1;MET		ERBB3;ERBB2;MET;EGFR;TSC2;MTOR;PIK3CA;ILK;KDR;KIT	MTOR;EGFR;IGF1R;ITGB1	KLF4;KDR;PDGFRA;FGFR1;KIT;MET;PDGFRB;TSC2;MTOR;PIK3CA;RET;ESR1;EGFR;ITGB1		PDGFRB;KDR;PIK3CA;SRC;KIT;FGFR1	MTOR;PDGFRB;KLF4;MET;ERBB2;RET;ITGB1;FGFR1;TSC2;ESR1;PIK3CA;KDR;PDGFRA;PTEN;KIT;SRC		PIK3CA;SRC;KIT;RET;KDR;PDGFRB;FGFR1	ERBB3;ESR1;TNFSF11;SRC;KIT;TSC2;PIK3CA;PDGFRB;KDR;KLF4;ITGB1;RET;FGFR1;PDGFRA;ERBB2;GATA3;MET;MTOR	ERBB2;MET;ILK;FGFR1;MTOR;PDGFRB;SRC;KLF4;TSC2;ITGB1;RET;PTEN;PIK3CA;EGFR	PIK3CA;PDGFRB;FGFR1;KDR;RET;KIT	ESR1;PDGFRA;ERBB3;ITGB1;TSC2;RET;ERBB2;TNFSF11;GATA3;MET;MTOR;KLF4	MTOR;PDGFRA;ESR1;ITGB1;RET;KLF4;TSC2;EGFR;MET	TSC2;KLF4;ITGB1	4		10		7	10
GO_CELL_ACTIVATION	3.777	10.753	5.609	5.424	7.95	7.802	6.451	5.994	8.485	4.991	10.345		4.775	12.124	10.62	4.41	8.754	5.001	1.694	PIK3CA;TP53;ANXA1;JUN;ATG7;PDGFRB;BAD;SRC;ITGA4		BAD;EGFR;PDGFRA;ERBB2;KIT;CAV1;CDKN1A;SOCS1;GATA3;ATM;STAT3;MTOR;TP53;ANXA1;JUN;ITGB1;STAT6	CAV1;BAD;TP53;ERBB2	EGFR;PDGFRA;GATA3;ATM;BAD;STAT3;ERBB2;KIT;CAV1	BAX;IDH1;PDGFRA;ERBB2;PRKDC;MTOR;BAK1;CTNNB1;ITGB1;HDAC4;CDKN1A;STAT6	STAT3;PIK3CA;ATM;MTOR;BAK1;CASP3;EGFR;KIT;ITGB1;HDAC4;ERBB2;YWHAZ;STAT6;ILK;CAV1;BAD		ILK;HDAC4;BAX;BAD;PRKDC;STAT6;ERBB2;MTOR;EGFR;ATM;CDKN1A;IDH1;CTNNB1;ITGB1;CAV1		CASP3;ERBB2;KIT;STAT6;CAV1;EGFR;MTOR;PIK3CA;ILK;STAT3;HDAC4;BAD;ATM	JUN;SOCS1;ANXA1;MTOR;CDKN1A;STAT6;TP53;EGFR;ITGB1	HDAC4;PDGFRB;TP53;ATG7;PRKDC;EGFR;STAT6;ITGA4;ZEB1;JUN;KIT;STAT3;CASP3;PIK3CA;ITGB1;CTNNB1;PDGFRA;BAD;MTOR;CDKN1A;ANXA1	TP53;ERBB2;CAV1	PDGFRB;TP53;ANXA1;CASP3;PIK3CA;ITGA4;BAD;ATG7;STAT3;SRC;JUN;KIT	PDGFRB;HDAC4;ITGB1;TP53;PDGFRA;CTNNB1;CASP3;BAX;MTOR;PRKDC;ERBB2;JUN;STAT3;ATG7;STAT6;IDH1;BAK1;PIK3CA;BAD;ITGA4;CDKN1A;ANXA1;KIT;SRC		ANXA1;ATG7;PIK3CA;BAD;STAT6;TP53;SRC;KIT;PDGFRB;CASP3;JUN	BAX;EP300;HDAC4;STAT6;PDGFRB;TP53;ZEB1;SRC;PIK3CA;CAV1;GATA3;TNFSF11;KIT;CASP3;PRKDC;MTOR;BAD;ATG7;JUN;CDKN1A;ANXA1;CTNNB1;IDH1;ITGB1;PDGFRA;ERBB2	ERBB2;ATM;CTNNB1;ILK;PDGFRB;HDAC4;ITGA4;ITGB1;ATG7;PRKDC;CDKN1A;ANXA1;MTOR;CAV1;PIK3CA;IDH1;STAT6;SRC;EGFR;BAX;JUN;BAD;TP53	ATG7;STAT6;PIK3CA;PDGFRB;BAD;TP53;CASP3;ANXA1;STAT3;ITGA4;KIT;JUN	CTNNB1;PDGFRA;EP300;PRKDC;ZEB1;ITGB1;CAV1;ERBB2;CDKN1A;TNFSF11;BAX;GATA3;BAD;STAT6;IDH1;MTOR;HDAC4	MTOR;PDGFRA;ITGB1;STAT6;HDAC4;EGFR;PRKDC;CTNNB1;CDKN1A;ZEB1	ITGB1;BAK1;YWHAZ	9		17	4	9	12
GO_NEGATIVE_REGULATION_OF_INTRACELLULAR_SIGNAL_TRANSDUCTION	4.901	10.67	5.155	7.665	8.21	9.896	6.715	5.403	8.946	5.212	12.882		2.16	10.79	13.803	3.951	9.275	5.301	2.687	DEPTOR;KDM1A;STAT1;SRC;RELA;PTGS2;MYC		DEPTOR;AKT1S1;CAV1;HDAC3;MET;PRKAA1;ATM;MTOR;ITGB1;IGF1R;BCL2L1;RELA	CAV1;RELA	ATM;MET;DEPTOR;BCL2L1;CAV1;HDAC3	ESR1;MET;PRKAA1;TSC2;PTEN;MTOR;FOXO1;AKT1S1;ITGB1;KLF4	TSC2;KLF4;DEPTOR;ATM;MTOR;ITGB1;RELA;MET;CAV1;HDAC3;FOXO1		KLF4;FOXO1;RELA;CAV1;MTOR;AKT1S1;ATM;PTEN;TSC2;ITGB1;MET;PRKAA1		FOXO1;CAV1;MET;MTOR;TSC2;DEPTOR;HDAC3;RELA;ATM	MTOR;RELA;PRKAA1;IGF1R;AKT1S1;ITGB1	HDAC3;FOXO1;KLF4;MYC;MET;RELA;TSC2;KDM1A;MTOR;ESR1;STAT1;ITGB1;PTGS2;DEPTOR	CAV1;RELA	PTGS2;KDM1A;HDAC3;RELA;MYC;SRC;DEPTOR;STAT1	MTOR;KLF4;MET;FOXO1;ITGB1;AKT1S1;DEPTOR;MYC;ESR1;PTGS2;STAT1;TSC2;PRKAA1;HDAC3;RELA;KDM1A;PTEN;SRC		PTGS2;STAT1;SRC;DEPTOR	DEPTOR;PTGS2;ESR1;TWIST1;SRC;TSC2;FOXO1;CAV1;HDAC1;AKT1S1;ITGB1;STAT1;KLF4;PRKAA1;MET;MTOR	AKT1S1;ATM;MET;FOXO1;KDM1A;MTOR;DEPTOR;PRKAA1;RELA;SRC;STAT1;CAV1;TSC2;ITGB1;MYC;KLF4;PTEN;PTGS2	STAT1;KDM1A;MYC;PTGS2;HDAC3;RELA;DEPTOR	ESR1;TWIST1;AKT1S1;HDAC1;ITGB1;TSC2;FOXO1;CAV1;PRKAA1;MET;MTOR;KLF4	MTOR;ESR1;FOXO1;ITGB1;KLF4;TSC2;MET	TSC2;KLF4;ITGB1	7		12	2	6	10
GO_CELL_CYCLE	10.699	10.514	5.903	11.531	16.394	13.359	13.035	5.382	23.986	13.669	23.921		12.746	22.035	25.15	16.22	10.154	8.656	4.451	EHMT2;CCNC;BRCA2;RB1;TP53;FGFR1;ANXA1;JUN;RRM2;PDGFRB;AURKA;MKI67;MED1;SRC;EIF4EBP1;PTGS2;MYC;KAT2B		EGFR;RPS6KB1;CDKN1A;HDAC3;PRKAA1;GATA3;RPTOR;STAT3;ATM;MTOR;TP53;ITGB1;ANXA1;CHEK1;JUN;PRKAB1;BCL2L1;PHF8	RPTOR;CHEK1;ATR;TP53	EGFR;GATA3;ATM;CHEK1;RPS6KB1;PHF8;RPTOR;STAT3;BCL2L1;HDAC3	BAX;TSC2;ATR;CHEK2;PRKDC;BAK1;ITGB1;PRKAA1;PTEN;MTOR;MAP2K6;CDKN1B;LRP6;NOTCH1;RPS6KB1;CTNNB1;CDKN1A;KLF4;MAP2K1;CHEK1	TSC2;BECN1;EIF4EBP1;MAP2K6;EGFR;PHF8;MED1;LRP6;ITGB1;CHEK2;RPS6KB1;PIAS1;BAK1;ILK;PRKAB1;EZH2;KLF4;CHEK1;STAT3;ATM;CDKN1B;MTOR;CASP3;RPTOR;RB1;HDAC3		CDKN1B;EGFR;TSC2;ITGB1;PRKAA1;CHEK2;MAP2K6;MTOR;PTEN;CHEK1;NOTCH1;ILK;PRKDC;RPTOR;KLF4;LRP6;BAX;MAP2K1;ATM;RPS6KB1;CDKN1A;CTNNB1		CDKN1B;STAT3;MED1;LRP6;RPS6KB1;CASP3;CHEK2;TSC2;HDAC3;RB1;PHF8;PIAS1;ILK;BECN1;ATM;CHEK1;MAP2K6;RPTOR;EGFR;MTOR;EIF4EBP1	JUN;ANXA1;MTOR;PRKAB1;CDKN1A;PRKAA1;TP53;EGFR;ITGB1	PDGFRB;MAP2K1;CHEK1;KAT2B;LRP6;TP53;EHMT2;PRKDC;CHEK2;AURKA;EGFR;NOTCH1;RB1;RRM2;PHGDH;KLF4;MYC;JUN;BRCA2;STAT3;CASP3;CCNC;RPTOR;CHAF1A;ITGB1;RPS6KB1;HDAC3;CTNNB1;MAP2K6;FGFR1;CBX3;TSC2;MTOR;MKI67;ATR;CDKN1B;CDKN1A;ANXA1;PTGS2;PIAS1	TP53;CHEK1;ATR;RPTOR	RRM2;TP53;MKI67;CASP3;HDAC3;STAT3;SRC;CHEK2;FGFR1;EHMT2;BRCA2;RPS6KB1;EIF4EBP1;CCNC;AURKA;JUN;PDGFRB;ANXA1;KAT2B;PHGDH;RB1;PTGS2;MYC	AURKA;ATR;CHEK2;BRCA2;PDGFRB;CHEK1;ITGB1;TP53;CDKN1B;PRKAA1;HDAC3;PTEN;CTNNB1;CASP3;BAX;MTOR;EHMT2;PRKDC;MAP2K6;MYC;FGFR1;TSC2;EIF4EBP1;RPS6KB1;JUN;STAT3;LRP6;PHGDH;KAT2B;NOTCH1;PTGS2;BAK1;RRM2;MKI67;RB1;KLF4;MAP2K1;CDKN1A;ANXA1;CCNC;SRC		CHEK1;KAT2B;PTGS2;CCNC;CHEK2;CASP3;RPS6KB1;AURKA;FGFR1;PDGFRB;JUN;ANXA1;EIF4EBP1;MKI67;PHGDH;BRCA2;TP53;SRC;RB1;CHAF1A;RRM2	RPS6KB1;FGFR1;BAX;EP300;PHGDH;CHEK1;LRP6;RB1;CCNC;PDGFRB;TP53;CHEK2;CHAF1A;PRKAA1;MKI67;CDKN1B;KAT2B;SRC;TSC2;MAP2K1;MED1;GATA3;RPTOR;RRM2;PTGS2;CASP3;PRKDC;AURKA;EIF4EBP1;MTOR;JUN;MAP2K6;CDKN1A;ANXA1;CTNNB1;ITGB1;BRCA2;KLF4;NOTCH1	ATM;CTNNB1;ILK;PDGFRB;PRKAA1;EIF4EBP1;TSC2;ITGB1;MYC;FGFR1;PRKDC;CDKN1A;ANXA1;EHMT2;RPS6KB1;MTOR;MED1;KAT2B;RPTOR;NOTCH1;LRP6;SRC;MAP2K1;CCNC;MKI67;BRCA2;MAP2K6;AURKA;CDKN1B;CHEK1;PTGS2;EGFR;RRM2;BAX;CHEK2;JUN;KLF4;PTEN;TP53;RB1	PIAS1;RB1;PTGS2;ANXA1;MKI67;RRM2;CHEK2;CHEK1;PHGDH;ATR;STAT3;JUN;PDGFRB;CCNC;BRCA2;CBX3;CHAF1A;RPTOR;FGFR1;KAT2B;TP53;MYC;RPS6KB1;HDAC3;CASP3;AURKA;EHMT2	MAP2K1;CTNNB1;TSC2;CDKN1A;NOTCH1;GATA3;BAX;MED1;EP300;PRKDC;RPTOR;LRP6;ITGB1;PRKAA1;CHEK2;KLF4;MAP2K6;RPS6KB1;CDKN1B;MTOR	MTOR;NOTCH1;CHEK2;ITGB1;MAP2K1;PRKDC;KLF4;CDKN1B;LRP6;CTNNB1;MAP2K6;TSC2;RPS6KB1;EGFR;CDKN1A	ITGB1;MED1;EZH2;TSC2;KLF4;PRKAB1;BAK1	18		18	4	10	20
GO_CELLULAR_RESPONSE_TO_PEPTIDE	9.169	10.494	2.445	8.628	9.312	9.792	7.611	8.811	12.684	10.68	18.555		8.712	13.614	18.316	8.821	6.903	5.959	2.916	SMARCC1;PIK3CA;EIF4EBP1;TP53;SRC;STAT1;STAT5A;RELA;ITGA4;KAT2B		STAT6;RPS6KB1;CAV1;SOCS1;VIM;PRKAA1;STAT3;TP53;IGF1R;STAT5A;RELA	CAV1;RELA;TP53	CAV1;RPS6KB1;STAT3	SHC1;VIM;PRKAA1;TSC2;PTEN;PRKDC;RPS6KB1;FOXO1;KLF4;STAT6	TSC2;KLF4;EIF4EBP1;STAT3;VIM;PIK3CA;RELA;RPS6KB1;STAT6;CAV1;FOXO1		FOXO1;VIM;RELA;STAT6;PRKDC;CAV1;RPS6KB1;PTEN;TSC2;KLF4;PRKAA1		RPS6KB1;FOXO1;STAT6;CAV1;TSC2;PIK3CA;EIF4EBP1;STAT3;RELA	SOCS1;VIM;STAT5A;RELA;PRKAA1;TP53;STAT6;IGF1R	PRKDC;KLF4;FOXO1;VIM;SMARCC1;RELA;TSC2;STAT3;KAT2B;PIK3CA;STAT5A;STAT1;RPS6KB1;STAT6;TP53;ITGA4	TP53;CAV1;RELA	STAT5A;SMARCC1;TP53;RPS6KB1;PIK3CA;ITGA4;RELA;KAT2B;EIF4EBP1;STAT3;SRC;STAT1	STAT5A;TP53;STAT1;PRKAA1;PTEN;VIM;PRKDC;TSC2;EIF4EBP1;RPS6KB1;STAT3;STAT6;KAT2B;SHC1;PIK3CA;KLF4;ITGA4;FOXO1;RELA;SMARCC1;SRC		STAT1;EIF4EBP1;PIK3CA;STAT6;SMARCC1;TP53;SRC;RPS6KB1;KAT2B;STAT5A	RPS6KB1;KAT2B;SMARCC1;SRC;VIM;TSC2;PIK3CA;FOXO1;CAV1;PRKDC;EIF4EBP1;STAT6;TP53;STAT5A;STAT1;KLF4;PRKAA1	FOXO1;PRKAA1;ITGA4;EIF4EBP1;TSC2;PRKDC;CAV1;KAT2B;SMARCC1;PIK3CA;STAT6;RELA;SRC;KLF4;VIM;STAT1;STAT5A;RPS6KB1;PTEN;TP53	PIK3CA;STAT6;STAT1;SMARCC1;STAT5A;KAT2B;TP53;RPS6KB1;RELA;STAT3;ITGA4	PRKDC;TSC2;RPS6KB1;CAV1;FOXO1;PRKAA1;STAT6;VIM;KLF4	FOXO1;STAT6;PRKDC;KLF4;VIM;RPS6KB1;TSC2	TSC2;KLF4;VIM	10		11	3	3	10
GO_POSITIVE_REGULATION_OF_TRANSFERASE_ACTIVITY	3.361	10.434	6.715	12.131	11.272	14.527	10.038	4.796	13.222	5.212	17.167		4.711	16.148	16.024	4.751	13.512	10.015	1.496	PIK3CA;PDGFRB;BAD;FGFR1;SRC;MYC		BAD;EGFR;PDGFRA;ERBB2;KIT;CDKN1A;MET;SOCS1;PRKAA1;RPTOR;MTOR;ERBB3;IGF1R	RPTOR;BAD;ERBB2	EGFR;PDGFRA;MET;BAD;RPTOR;ERBB3;ERBB2;KIT	MET;PDGFRA;SHC1;BRAF;PRKAA1;ERBB2;RET;PTEN;MTOR;MAP2K6;CDKN1B;CTNNB1;KLF4;MAP2K1;CDKN1A	KLF4;PIK3CA;CDKN1B;MTOR;KDR;EGFR;KIT;RPTOR;ILK;ERBB2;MET;ERBB3;EZH2;MAP2K6;BAD		ILK;MAP2K6;BAD;ERBB2;RPTOR;MAP2K1;MTOR;CDKN1B;EGFR;CDKN1A;RET;PTEN;CTNNB1;KLF4;MET;PRKAA1;BRAF		ERBB3;CDKN1B;ERBB2;MAP2K6;RPTOR;KIT;MET;EGFR;MTOR;PIK3CA;ILK;KDR;BAD	SOCS1;MTOR;CDKN1A;PRKAA1;EGFR;IGF1R	PDGFRB;MAP2K1;EGFR;KLF4;BRAF;KDR;MYC;KIT;RPTOR;PIK3CA;RET;CTNNB1;PDGFRA;FGFR1;MAP2K6;BAD;MET;MTOR;CDKN1B;CDKN1A	ERBB2;RPTOR	PDGFRB;KDR;PIK3CA;BAD;MYC;SRC;ALK;KIT;FGFR1	PDGFRB;BRAF;RET;CDKN1B;PRKAA1;PDGFRA;PTEN;CTNNB1;MTOR;MAP2K6;ERBB2;MYC;FGFR1;ALK;KDR;SHC1;PIK3CA;BAD;KLF4;MAP2K1;MET;CDKN1A;KIT;SRC		PIK3CA;BAD;SRC;KIT;RET;KDR;PDGFRB;FGFR1	FGFR1;PDGFRB;KDR;PRKAA1;CDKN1B;SRC;PIK3CA;MAP2K1;MET;RPTOR;TNFSF11;KIT;MTOR;BAD;ERBB3;MAP2K6;CDKN1A;BRAF;CTNNB1;RET;KLF4;PDGFRA;ERBB2	ERBB2;CTNNB1;ILK;PDGFRB;PRKAA1;BRAF;MYC;FGFR1;CDKN1A;MET;MTOR;RPTOR;PIK3CA;SRC;MAP2K1;MAP2K6;RET;CDKN1B;EGFR;BAD;KLF4;PTEN	PIK3CA;RPTOR;PDGFRB;FGFR1;KDR;BAD;MYC;RET;KIT	CTNNB1;PDGFRA;MAP2K1;RPTOR;ERBB3;CDKN1B;MAP2K6;BRAF;RET;ERBB2;CDKN1A;TNFSF11;PRKAA1;MET;BAD;MTOR;KLF4	MTOR;PDGFRA;MAP2K1;EGFR;RET;KLF4;BRAF;CDKN1B;CTNNB1;CDKN1A;MAP2K6;MET	EZH2;KLF4	6		13	3	8	15
GO_RESPONSE_TO_DRUG	10.391	10.37	4.439	9.762	10.461	10.959	8.754	7.247	21.523	14.609	23.723		11.19	15.892	19.421	15.039	7.94	8.322	1.887	TP53;ANXA1;FOS;STAT1;BAD;LDHA;RELA;SRC;DNMT3B;PTGS2;MYC		BAD;EGFR;CDKN1A;FOS;NCOA1;GATA3;DNMT3B;STAT3;ANXA1;TP53;RELA	RELA;ATR;FOS;BAD;CHUK;TP53	EGFR;GATA3;BAD;NCOA1;STAT3	NCOA1;ATR;RET;CHEK2;PTEN;CDKN1B;BAK1;MAP2K6;HDAC4;CTNNB1;CDKN1A	RELA;STAT3;NCOA1;DNMT3B;CDKN1B;BAK1;CASP3;EGFR;CHEK2;HDAC4;MAP2K6;BAD		CHEK2;MAP2K6;HDAC4;BAD;RELA;CDKN1B;EGFR;CDKN1A;NCOA1;RET;PTEN;CTNNB1		CASP3;CDKN1B;MAP2K6;BAD;CHEK2;EGFR;STAT3;RELA;HDAC4;NCOA1	ANXA1;CDKN1A;RELA;DNMT3B;TP53;EGFR;FOS	HDAC4;RELA;TP53;CHUK;CHEK2;STAT1;EGFR;LDHA;MYC;STAT3;CASP3;RET;DNMT3B;CTNNB1;MAP2K6;NCOA1;BAD;FOS;ATR;CDKN1B;CDKN1A;ANXA1;PTGS2	FOS;TP53;CHUK;RELA;ATR	PTGS2;TP53;FOS;ANXA1;LDHA;CASP3;CHUK;RELA;BAD;MYC;STAT3;SRC;CHEK2;STAT1;DNMT3B	ATR;CHEK2;HDAC4;RET;TP53;CDKN1B;STAT1;CHUK;LDHA;PTEN;CTNNB1;CASP3;NCOA1;MAP2K6;MYC;STAT3;FOS;PTGS2;BAK1;BAD;DNMT3B;CDKN1A;ANXA1;RELA;SRC		LDHA;STAT1;ANXA1;BAD;TP53;SRC;FOS;DNMT3B;RET;CHEK2;PTGS2;CASP3	HDAC4;CHEK2;TP53;CDKN1B;SRC;GATA3;DNMT3B;PTGS2;CASP3;BAD;MAP2K6;CDKN1A;NCOA1;ANXA1;FOS;CTNNB1;STAT1;RET;LDHA	DNMT3B;CTNNB1;NCOA1;HDAC4;MYC;CDKN1A;ANXA1;PTEN;FOS;RELA;SRC;MAP2K6;RET;PTGS2;EGFR;STAT1;BAD;LDHA;CDKN1B;TP53;CHEK2	FOS;STAT1;LDHA;DNMT3B;CHUK;BAD;TP53;CHEK2;MYC;PTGS2;CASP3;RELA;ANXA1;ATR;STAT3;RET	CTNNB1;MAP2K6;RET;CDKN1A;GATA3;BAD;CHEK2;HDAC4;NCOA1;CDKN1B	CHEK2;NCOA1;HDAC4;RET;CDKN1B;CTNNB1;MAP2K6;CDKN1A;EGFR	DNMT3B;BAK1	11		11	6	5	11
GO_CELLULAR_RESPONSE_TO_ACID_CHEMICAL		10.279	7.713	2.232	4.695	3.468	4.968	4.355	6.72		1.702			5.228	2.9	2.03	4.709	5.334				EGFR;PDGFRA;SOCS1;DNMT1;RPTOR;MTOR;BCL2L1		EGFR;PDGFRA;RPTOR;BCL2L1;DNMT1	MTOR;PDGFRA	EGFR;DNMT1;MTOR;RPTOR		RPTOR;MTOR;EGFR		EGFR;DNMT1;MTOR;RPTOR	MTOR;EGFR;SOCS1	PDGFRA;MTOR;RPTOR;EGFR;DNMT1;ZEB1			MTOR;PDGFRA			DNMT1;ZEB1;PDGFRA;MTOR;RPTOR	RPTOR;MTOR;EGFR	RPTOR;DNMT1	ZEB1;PDGFRA;MTOR;RPTOR	MTOR;PDGFRA;EGFR;ZEB1				7		5	2
GO_RESPONSE_TO_GROWTH_FACTOR	6.946	10.274	5.508	9.557	7.801	10.577	7.634	5.778	11.949	7.972	16.868		6.498	19.238	16.904	6.349	13.309	6.44	2.387	TP53;FGFR1;ANXA1;JUN;FOS;PDGFRB;MED1;SRC;RELA;MYC		EGFR;PDGFRA;RPS6KB1;ERBB2;AKT1S1;CAV1;FOS;GATA3;SMAD2;TP53;ANXA1;JUN;RELA	RELA;CAV1;FOS;ERBB2;TP53	EGFR;PDGFRA;SMAD2;GATA3;RPS6KB1;ERBB2;CAV1	CLDN1;PDGFRA;CREBBP;SHC1;SMAD2;ERBB2;ITGA5;PTEN;RPS6KB1;AKT1S1;CTNNB1;KLF4;NOTCH1	SMAD2;KLF4;MED1;KDR;CREBBP;CASP3;EGFR;RELA;ERBB2;RPS6KB1;ILK;CAV1		ILK;ITGA5;ERBB2;RELA;CAV1;AKT1S1;CREBBP;EGFR;RPS6KB1;PTEN;CTNNB1;KLF4;NOTCH1;SMAD2		RPS6KB1;CASP3;ERBB2;CAV1;EGFR;ILK;KDR;RELA;MED1;CREBBP;SMAD2	JUN;ANXA1;RELA;TP53;EGFR;FOS;AKT1S1	RELA;PDGFRB;TP53;ITGA5;CREBBP;EGFR;NOTCH1;ZEB1;KLF4;KDR;MYC;JUN;CASP3;RPS6KB1;CTNNB1;PDGFRA;FGFR1;FOS;ANXA1	FOS;ERBB2;TP53;CAV1;RELA	PDGFRB;TP53;KDR;FOS;RPS6KB1;ANXA1;CASP3;RELA;MYC;SRC;JUN;FGFR1	CLDN1;PDGFRB;AKT1S1;TP53;PDGFRA;PTEN;CTNNB1;CASP3;ERBB2;MYC;CREBBP;FGFR1;ITGA5;RPS6KB1;JUN;KDR;FOS;NOTCH1;SHC1;SMAD2;KLF4;ANXA1;RELA;SRC		ANXA1;TP53;SRC;CASP3;RPS6KB1;FOS;KDR;PDGFRB;FGFR1;JUN	RPS6KB1;EP300;PDGFRB;KDR;TP53;ZEB1;CREBBP;SRC;CAV1;CLDN1;AKT1S1;ITGA5;MED1;GATA3;CASP3;TWIST1;JUN;ANXA1;FOS;CTNNB1;SMAD2;KLF4;FGFR1;PDGFRA;ERBB2;NOTCH1	ERBB2;CTNNB1;ILK;PDGFRB;MYC;FGFR1;AKT1S1;ANXA1;ITGA5;RPS6KB1;CAV1;FOS;MED1;CREBBP;NOTCH1;RELA;SRC;EGFR;SMAD2;JUN;KLF4;PTEN;TP53	PDGFRB;FOS;FGFR1;KDR;TP53;MYC;RPS6KB1;CASP3;RELA;ANXA1;JUN	CTNNB1;PDGFRA;ZEB1;EP300;TWIST1;AKT1S1;RPS6KB1;CAV1;CREBBP;ERBB2;SMAD2;GATA3;NOTCH1;CLDN1;MED1;ITGA5;KLF4	NOTCH1;PDGFRA;EGFR;CREBBP;KLF4;CTNNB1;RPS6KB1;ITGA5;ZEB1	MED1;KLF4;SMAD2	10		13	5	7	13
GO_POSITIVE_REGULATION_OF_CELL_DEATH	10.336	10.271	3.503	13.168	12.261	15.625	9.885	6.973	21	11.263	23.926		10.879	21.623	25.562	11.509	13.306	11.122	2.387	TP53;ANXA1;FOS;ATG7;JUN;PDGFRB;BAD;LDHA;ITGA4;MAPK8;SRC;PTGS2;MYC		BAD;CDKN1A;CAV1;FOS;NCOA1;ATM;MTOR;TP53;ANXA1;JUN;SQSTM1;ITGB1;BCL2L1	CAV1;FOS;SQSTM1;BAD;TP53	ATM;BAD;NCOA1;BCL2L1;CAV1	NCOA1;BAX;RET;CHEK2;PRKDC;PTEN;MTOR;BAK1;MAP2K6;ITGB1;CDKN1B;FOXO1;HDAC4;NOTCH1;CTNNB1;CDKN1A	BECN1;NCOA1;FOXO1;ATM;CDKN1B;MTOR;BAK1;MAPK8;CASP3;ITGB1;CHEK2;HDAC4;YWHAZ;CAV1;MAP2K6;BAD		CHEK2;MAP2K6;HDAC4;FOXO1;BAD;BAX;PRKDC;CDKN1B;MTOR;ATM;CDKN1A;NCOA1;RET;PTEN;CTNNB1;ITGB1;NOTCH1;CAV1		CASP3;CDKN1B;MAP2K6;FOXO1;BAD;CHEK2;CAV1;MTOR;MAPK8;BECN1;HDAC4;NCOA1;ATM	JUN;ANXA1;MTOR;CDKN1A;TP53;FOS;SQSTM1;ITGB1	HDAC4;PDGFRB;TP53;ATG7;PRKDC;FOXO1;CHEK2;NOTCH1;ITGA4;LDHA;MYC;JUN;CASP3;RET;SQSTM1;MAPK8;ITGB1;CTNNB1;MAP2K6;NCOA1;BAD;MTOR;FOS;CDKN1B;CDKN1A;ANXA1;PTGS2	TP53;FOS;SQSTM1;CAV1	PTGS2;PDGFRB;TP53;FOS;ANXA1;LDHA;CASP3;ITGA4;MAPK8;BAD;ATG7;MYC;SRC;JUN;CHEK2	CHEK2;PDGFRB;HDAC4;RET;ITGB1;TP53;CDKN1B;LDHA;PTEN;CTNNB1;CASP3;BAX;NCOA1;MTOR;PRKDC;MAP2K6;MYC;JUN;FOS;ATG7;NOTCH1;PTGS2;BAK1;MAPK8;BAD;ITGA4;FOXO1;CDKN1A;ANXA1;SRC		LDHA;ANXA1;ATG7;BAD;TP53;SRC;MAPK8;FOS;RET;CHEK2;PTGS2;PDGFRB;CASP3;JUN	BAX;HDAC4;PDGFRB;TP53;CHEK2;CDKN1B;SRC;SQSTM1;FOXO1;CAV1;PTGS2;CASP3;PRKDC;MTOR;BAD;ATG7;JUN;MAP2K6;CDKN1A;NCOA1;ANXA1;FOS;MAPK8;CTNNB1;ITGB1;RET;LDHA;NOTCH1	ATM;NCOA1;CTNNB1;FOXO1;PDGFRB;HDAC4;ITGA4;ITGB1;ATG7;MYC;PRKDC;CDKN1A;ANXA1;MTOR;CAV1;FOS;NOTCH1;MAPK8;SRC;MAP2K6;RET;CDKN1B;PTGS2;BAX;JUN;BAD;LDHA;PTEN;TP53;CHEK2	ATG7;PDGFRB;FOS;LDHA;MAPK8;BAD;TP53;CHEK2;MYC;PTGS2;CASP3;ANXA1;SQSTM1;ITGA4;RET;JUN	CTNNB1;PRKDC;ITGB1;MAP2K6;NCOA1;RET;FOXO1;CAV1;CDKN1A;NOTCH1;BAX;BAD;CHEK2;HDAC4;SQSTM1;CDKN1B;MTOR	MTOR;NOTCH1;CHEK2;NCOA1;FOXO1;HDAC4;ITGB1;RET;PRKDC;CDKN1B;CTNNB1;CDKN1A;MAP2K6	ITGB1;BAK1;YWHAZ	13		13	5	5	16
GO_REGULATION_OF_CELLULAR_RESPONSE_TO_STRESS	3.274	10.214	7.904	13.102	11.018	16.818	9.828	3.676	12.874	4.254	15.617		3.05	14.627	17.974	6.297	14.473	7.493	1.47	TP53;ATG7;KDM1A;BAD;PTGS2;MYC		BAD;EGFR;AKT1S1;CAV1;HDAC3;MET;RPTOR;ATM;MTOR;TP53;CHEK1;IGF1R;BCL2L1	CHEK1;ATR;CAV1;BAD;RPTOR;TP53	EGFR;ATM;CHEK1;BAD;MET;RPTOR;BCL2L1;CAV1;HDAC3	BAX;CREBBP;MET;ATR;CHEK2;PRKDC;PTEN;MTOR;BAK1;FOXO1;AKT1S1;KLF4;MAP2K1;CTNNB1;SIRT6;CHEK1	KLF4;CHEK1;FOXO1;ATM;MTOR;CREBBP;BAK1;EGFR;RPTOR;CHEK2;MET;SIRT6;CAV1;HDAC3;BAD		SIRT6;AKT1S1;EGFR;CREBBP;CAV1;CHEK2;MTOR;PTEN;CHEK1;FOXO1;BAD;PRKDC;RPTOR;KLF4;MET;BAX;MAP2K1;ATM;CTNNB1		CHEK1;FOXO1;CREBBP;RPTOR;CHEK2;CAV1;MET;EGFR;MTOR;HDAC3;BAD;SIRT6;ATM	MTOR;TP53;EGFR;IGF1R;AKT1S1	MAP2K1;CHEK1;TP53;ATG7;PRKDC;FOXO1;KDM1A;CHEK2;CREBBP;EGFR;KLF4;MYC;RPTOR;HDAC3;CTNNB1;BAD;MET;MTOR;ATR;PTGS2	CHEK1;RPTOR;TP53;CAV1;ATR	PTGS2;KDM1A;TP53;HDAC3;BAD;ATG7;MYC;CHEK2	ATR;CHEK2;CHEK1;AKT1S1;TP53;HDAC3;PTEN;CTNNB1;BAX;MTOR;SIRT6;PRKDC;MYC;CREBBP;ATG7;PTGS2;BAK1;BAD;KLF4;MAP2K1;MET;FOXO1;KDM1A		CHEK1;ATG7;BAD;TP53;CHEK2;PTGS2	BAX;EP300;CHEK1;CHEK2;TP53;CREBBP;MAP2K1;FOXO1;CAV1;AKT1S1;MET;RPTOR;PTGS2;TNFSF11;PRKDC;MTOR;BAD;ATG7;TWIST1;CTNNB1;KLF4;SIRT6	ATM;CTNNB1;FOXO1;SIRT6;ATG7;MYC;AKT1S1;PRKDC;MET;KDM1A;MTOR;CAV1;CREBBP;RPTOR;MAP2K1;CHEK1;PTGS2;EGFR;BAX;BAD;KLF4;PTEN;TP53;CHEK2	ATG7;RPTOR;KDM1A;TP53;BAD;CHEK2;MYC;PTGS2;CHEK1;HDAC3;ATR	EP300;CTNNB1;MAP2K1;PRKDC;RPTOR;TWIST1;AKT1S1;FOXO1;CAV1;CREBBP;TNFSF11;BAX;MET;BAD;CHEK2;SIRT6;MTOR;KLF4	MTOR;CHEK2;FOXO1;MAP2K1;CREBBP;PRKDC;KLF4;CTNNB1;EGFR;MET	KLF4;BAK1	6		13	6	9	16
GO_HEART_DEVELOPMENT	4.643	10.189	6.046	14.64	12.48	15.921	12.327	5.192	14.827	4.06	17.878		4.343	21.679	20.32	3.703	17.706	12.328	3.514	RB1;TP53;FGFR1;JUN;PDGFRB;MED1;KAT2B		EGFR;PDGFRA;ERBB2;CDKN1A;GATA3;ATM;MTOR;SMAD2;TP53;ERBB3;JUN;ITGB1	TP53;ERBB2	EGFR;PDGFRA;SMAD2;GATA3;ATM;ERBB3;ERBB2	PDGFRA;SHC1;LRP6;SMAD2;TSC2;ERBB2;PRKDC;PTEN;MTOR;CDKN1B;CTNNB1;ITGB1;NOTCH1;MAP2K1;CDKN1A;SIRT6	TSC2;SMAD2;MED1;RB1;ATM;CDKN1B;SIRT6;LRP6;MTOR;CASP3;EGFR;ILK;ITGB1;ERBB2;ERBB3		ILK;SIRT6;ERBB2;PRKDC;MAP2K1;CDKN1B;EGFR;MTOR;ATM;TSC2;CDKN1A;PTEN;CTNNB1;ITGB1;NOTCH1;LRP6;SMAD2		CASP3;ERBB3;CDKN1B;ERBB2;TSC2;EGFR;MTOR;ILK;RB1;MED1;SMAD2;SIRT6;ATM;LRP6	JUN;MTOR;CDKN1A;TP53;EGFR;ITGB1	PDGFRB;MAP2K1;KAT2B;LRP6;TP53;PRKDC;YAP1;EGFR;NOTCH1;RB1;JUN;CASP3;ITGB1;CTNNB1;PDGFRA;FGFR1;TSC2;MTOR;CDKN1B;CDKN1A	TP53;ERBB2	PDGFRB;TP53;CASP3;KAT2B;JUN;FGFR1;RB1	PDGFRB;ITGB1;TP53;CDKN1B;PDGFRA;PTEN;CTNNB1;CASP3;MTOR;SIRT6;PRKDC;ERBB2;FGFR1;TSC2;JUN;LRP6;KAT2B;NOTCH1;SHC1;SMAD2;RB1;MAP2K1;CDKN1A		FGFR1;TP53;RB1;KAT2B;PDGFRB;CASP3;JUN	FGFR1;EP300;LRP6;RB1;TP53;PDGFRB;CDKN1B;KAT2B;TSC2;MAP2K1;MED1;GATA3;CASP3;PRKDC;MTOR;ERBB3;TWIST1;JUN;CDKN1A;CTNNB1;SMAD2;ITGB1;SIRT6;PDGFRA;ERBB2;NOTCH1	ERBB2;ATM;CTNNB1;ILK;PDGFRB;SIRT6;TSC2;ITGB1;FGFR1;PRKDC;CDKN1A;MTOR;MED1;KAT2B;NOTCH1;LRP6;MAP2K1;CDKN1B;EGFR;SMAD2;JUN;PTEN;TP53;RB1	PDGFRB;FGFR1;KAT2B;TP53;RB1;CASP3;JUN	MAP2K1;SMAD2;CTNNB1;TSC2;CDKN1A;NOTCH1;GATA3;MED1;EP300;PDGFRA;PRKDC;LRP6;TWIST1;ERBB3;ITGB1;SIRT6;ERBB2;CDKN1B;MTOR	MTOR;NOTCH1;PDGFRA;ITGB1;MAP2K1;EGFR;PRKDC;CDKN1B;LRP6;CTNNB1;TSC2;CDKN1A;YAP1	MED1;ITGB1;SMAD2;TSC2	7		12	2	7	16
GO_NEGATIVE_REGULATION_OF_PHOSPHORUS_METABOLIC_PROCESS	3.752	10.167	3.888	11.988	16.312	14.503	14.963	6.346	14.786	6.832	19.025		4.33	16.758	17.791	7.277	12.298	7.214	2.593	RB1;DEPTOR;TP53;JUN;MYC;KAT2B		DEPTOR;AKT1S1;CAV1;HDAC3;SOCS1;CDKN1A;RPTOR;STAT3;MTOR;TP53;JUN;IGF1R	RPTOR;CAV1;TP53	RPTOR;STAT3;DEPTOR;CAV1;HDAC3	BAX;TSC2;PTEN;PRKDC;MTOR;BAK1;CDKN1B;FOXO1;KLF4;HDAC4;LRP6;AKT1S1;CDKN1A;SIRT6	TSC2;KLF4;STAT3;RB1;DEPTOR;CDKN1B;LRP6;BAK1;MTOR;IKBKB;CASP3;ILK;RPTOR;HDAC4;SIRT6;CAV1;HDAC3;FOXO1		ILK;FOXO1;HDAC4;BAX;SIRT6;PRKDC;RPTOR;AKT1S1;CDKN1B;MTOR;CDKN1A;PTEN;TSC2;KLF4;LRP6;CAV1		CASP3;CDKN1B;FOXO1;RPTOR;CAV1;TSC2;MTOR;ILK;HDAC3;RB1;DEPTOR;STAT3;IKBKB;HDAC4;SIRT6;LRP6	JUN;SOCS1;MTOR;CDKN1A;TP53;IGF1R;AKT1S1	HDAC4;KAT2B;LRP6;TP53;PRKDC;FOXO1;RB1;KLF4;IKBKB;MYC;JUN;STAT3;CASP3;RPTOR;HDAC3;TSC2;MTOR;CDKN1B;CDKN1A;DEPTOR	TP53;CAV1;RPTOR	TP53;CASP3;HDAC3;KAT2B;MYC;STAT3;JUN;DEPTOR;RB1;IKBKB	HDAC4;AKT1S1;TP53;CDKN1B;HDAC3;PTEN;BAX;CASP3;MTOR;SIRT6;PRKDC;MYC;TSC2;JUN;STAT3;LRP6;IKBKB;DEPTOR;KAT2B;BAK1;RB1;KLF4;FOXO1;CDKN1A		IKBKB;TP53;RB1;DEPTOR;KAT2B;CASP3;JUN	BAX;LRP6;HDAC4;RB1;TP53;DEPTOR;CDKN1B;KAT2B;TSC2;FOXO1;CAV1;AKT1S1;RPTOR;CASP3;PRKDC;MTOR;TWIST1;JUN;CDKN1A;KLF4;SIRT6;IKBKB	ILK;FOXO1;HDAC4;SIRT6;TSC2;MYC;AKT1S1;PRKDC;CDKN1A;PTEN;MTOR;DEPTOR;CAV1;KAT2B;RPTOR;LRP6;BAX;JUN;KLF4;CDKN1B;TP53;RB1	RPTOR;IKBKB;KAT2B;TP53;RB1;MYC;HDAC3;CASP3;STAT3;DEPTOR;JUN	PRKDC;RPTOR;LRP6;TWIST1;CDKN1B;AKT1S1;TSC2;FOXO1;CAV1;CDKN1A;BAX;SIRT6;HDAC4;MTOR;KLF4	MTOR;FOXO1;HDAC4;PRKDC;KLF4;CDKN1B;LRP6;TSC2;CDKN1A	KLF4;BAK1;TSC2	6		12	3	5	14
GO_RESPONSE_TO_LIGHT_STIMULUS	7.353	10.037	2.661	8.174	10.303	8.135	8.391	9.542	16.802	9.039	17.737		6.99	12.581	14.571	12.403	5.379	4.168	2.044	BRCA2;TP53;FOS;KDM1A;MAPK8;RELA;PTGS2;MYC		EGFR;KIT;CDKN1A;FOS;PRKAA1;MTOR;ITGB1;TP53;CHEK1;RELA	CHEK1;RELA;ATR;FOS;TP53	EGFR;CHEK1;KIT	BAX;CREBBP;PRKAA1;ATR;MTOR;BAK1;CDKN1A;ITGB1;CHEK1	CHEK1;PIAS1;MTOR;CREBBP;MAPK8;BAK1;CASP3;EGFR;KIT;ITGB1;RELA		BAX;RELA;MTOR;CREBBP;EGFR;CDKN1A;CHEK1;ITGB1;PRKAA1		CASP3;CHEK1;PIAS1;EGFR;MAPK8;MTOR;RELA;KIT;CREBBP	MTOR;CDKN1A;RELA;PRKAA1;TP53;EGFR;FOS;ITGB1	MYC;KIT;RELA;BRCA2;EGFR;KDM1A;CASP3;MTOR;CHEK1;ATR;FOS;CREBBP;CDKN1A;MAPK8;ITGB1;PTGS2;TP53;PIAS1	FOS;CHEK1;TP53;RELA;ATR	PTGS2;KDM1A;TP53;FOS;BRCA2;CASP3;RELA;MAPK8;MYC;KIT	ATR;BRCA2;CHEK1;ITGB1;TP53;PRKAA1;BAX;CASP3;MTOR;MYC;CREBBP;FOS;PTGS2;BAK1;MAPK8;CDKN1A;RELA;KIT;KDM1A		CHEK1;TP53;KIT;FOS;BRCA2;PTGS2;MAPK8;CASP3	PTGS2;BAX;CREBBP;EP300;KIT;CDKN1A;CASP3;CHEK1;FOS;MAPK8;TP53;ITGB1;BRCA2;PRKAA1;MTOR	CDKN1A;KDM1A;MAPK8;MTOR;PRKAA1;RELA;FOS;BAX;TP53;BRCA2;CREBBP;ITGB1;MYC;CHEK1;PTGS2;EGFR	PIAS1;FOS;MAPK8;KDM1A;TP53;BRCA2;MYC;PTGS2;CHEK1;CASP3;RELA;ATR;KIT	EP300;ITGB1;CREBBP;CDKN1A;PRKAA1;BAX;MTOR	MTOR;ITGB1;EGFR;CREBBP;CDKN1A	ITGB1;BAK1	8		10	5	3	9
GO_RESPONSE_TO_OXIDATIVE_STRESS	14.103	9.998	3.274	8.174	10.044	10.556	7.198	8.5	20.754	15.457	24.163		14.765	20.265	21.349	14.517	7.597	6.827	2.811	PDK1;TP53;ANXA1;FOS;ATG7;JUN;PDGFRB;STAT1;BAD;LDHA;MAPK8;SRC;RELA;PTGS2		BAD;EGFR;PDGFRA;MET;FOS;PRKAA1;TP53;ANXA1;JUN;STAT6;RELA	RELA;FOS;BAD;CHUK;TP53	EGFR;MET;BAD;PDGFRA	PDGFRA;IDH1;MET;PRKAA1;MAP1LC3A;FOXO1;BAK1;CTNNB1;KLF4;STAT6	KLF4;PDK1;FOXO1;BAK1;MAPK8;CASP3;EGFR;RELA;MET;STAT6;EZH2;BAD		FOXO1;MAP1LC3A;BAD;RELA;STAT6;EGFR;PDK1;IDH1;CTNNB1;KLF4;MET;PRKAA1		CASP3;PDK1;FOXO1;STAT6;MET;EGFR;MAPK8;RELA;BAD	JUN;ANXA1;RELA;PRKAA1;TP53;STAT6;EGFR;FOS	RELA;MAP1LC3A;PDGFRB;TP53;ATG7;FOXO1;PDK1;CHUK;STAT1;EGFR;STAT6;LDHA;KLF4;JUN;CASP3;MAPK8;CTNNB1;PDGFRA;BAD;MET;FOS;ANXA1;PTGS2	TP53;FOS;CHUK;RELA	PTGS2;PDGFRB;TP53;FOS;ANXA1;LDHA;CASP3;CHUK;PDK1;RELA;MAPK8;BAD;ATG7;SRC;JUN;STAT1	PDGFRB;TP53;CHUK;STAT1;PRKAA1;LDHA;PDGFRA;CTNNB1;CASP3;MAP1LC3A;JUN;FOS;PDK1;ATG7;STAT6;IDH1;PTGS2;BAK1;MAPK8;BAD;KLF4;MET;FOXO1;ANXA1;RELA;SRC		LDHA;STAT1;ANXA1;ATG7;BAD;STAT6;TP53;SRC;MAPK8;FOS;PDK1;PTGS2;PDGFRB;CASP3;JUN	MAP1LC3A;STAT6;PDGFRB;TP53;PRKAA1;SRC;FOXO1;PTGS2;PDK1;CASP3;BAD;ATG7;JUN;ANXA1;FOS;MAPK8;IDH1;CTNNB1;KLF4;STAT1;MET;PDGFRA;LDHA	CTNNB1;FOXO1;PDGFRB;PRKAA1;MAP1LC3A;PDK1;ATG7;ANXA1;MET;FOS;IDH1;MAPK8;STAT6;SRC;RELA;KLF4;PTGS2;EGFR;STAT1;JUN;BAD;LDHA;TP53	ATG7;STAT6;PDK1;STAT1;LDHA;MAPK8;FOS;PDGFRB;CHUK;BAD;TP53;PTGS2;CASP3;RELA;ANXA1;JUN	CTNNB1;PDGFRA;MAP1LC3A;FOXO1;PRKAA1;MET;BAD;STAT6;IDH1;KLF4	PDGFRA;FOXO1;STAT6;KLF4;CTNNB1;MAP1LC3A;EGFR;MET	EZH2;KLF4;BAK1	14		11	5	4	10
GO_RESPONSE_TO_IONIZING_RADIATION	6.814	9.983	3.503	7.991	4.899	6.501	2.831	6.577	13.263	9.157	16.125		6.555	11.602	13.632	10.282	6.216	4.314	2.591	BRCA2;TP53;ANXA1;KDM1A;DNMT3B;MYC		CDKN1A;PRKAA1;ATM;GATA3;DNMT3B;ANXA1;TP53;BCL2L1	ATR;TP53	ATM;BCL2L1;GATA3	BAX;PRKAA1;ATR;CHEK2;PRKDC;BAK1;CDKN1A	DNMT3B;ATM;BAK1;CASP3;CHEK2		CHEK2;BAX;PRKDC;ATM;CDKN1A;PRKAA1		CASP3;CHEK2;ATM	ANXA1;CDKN1A;PRKAA1;TP53;DNMT3B	PRKDC;MYC;BRCA2;KDM1A;CASP3;CHEK2;ATR;YAP1;CDKN1A;ANXA1;TP53;DNMT3B	TP53;ATR	KDM1A;TP53;ANXA1;BRCA2;CASP3;MYC;CHEK2;DNMT3B	ATR;CHEK2;DNMT3B;BRCA2;PRKDC;MYC;CDKN1A;TP53;BAK1;ANXA1;PRKAA1;BAX;CASP3;KDM1A		ANXA1;TP53;DNMT3B;BRCA2;CHEK2;CASP3	DNMT3B;BAX;CASP3;CDKN1A;PRKDC;ANXA1;TP53;CHEK2;BRCA2;PRKAA1;GATA3	CDKN1A;DNMT3B;ANXA1;ATM;KDM1A;PRKAA1;BAX;BRCA2;MYC;TP53;PRKDC;CHEK2	DNMT3B;KDM1A;TP53;BRCA2;CHEK2;MYC;CASP3;ATR;ANXA1	PRKDC;CDKN1A;PRKAA1;BAX;GATA3;CHEK2	CDKN1A;YAP1;CHEK2;PRKDC	DNMT3B;BAK1	6		8	2	3	7
GO_NEGATIVE_REGULATION_OF_PHOSPHORYLATION	3.292	9.867	4.241	13.18	16.454	15.921	14.931	5.636	14.088	5.527	18.565		3.106	16.204	18.421	6.061	13.594	7.95	2.788	RB1;DEPTOR;JUN;MYC;KAT2B		DEPTOR;AKT1S1;HDAC3;CAV1;SOCS1;CDKN1A;RPTOR;STAT3;MTOR;JUN;IGF1R	RPTOR;CAV1	RPTOR;STAT3;DEPTOR;CAV1;HDAC3	BAX;TSC2;PTEN;PRKDC;MTOR;BAK1;CDKN1B;FOXO1;KLF4;HDAC4;LRP6;AKT1S1;CDKN1A;SIRT6	TSC2;KLF4;STAT3;RB1;DEPTOR;CDKN1B;LRP6;BAK1;MTOR;CASP3;ILK;RPTOR;HDAC4;SIRT6;CAV1;HDAC3;FOXO1		ILK;FOXO1;HDAC4;BAX;SIRT6;PRKDC;RPTOR;AKT1S1;CDKN1B;MTOR;CDKN1A;PTEN;TSC2;KLF4;LRP6;CAV1		CASP3;CDKN1B;FOXO1;RPTOR;CAV1;TSC2;MTOR;ILK;HDAC3;RB1;DEPTOR;STAT3;HDAC4;SIRT6;LRP6	JUN;SOCS1;MTOR;CDKN1A;IGF1R;AKT1S1	PRKDC;KLF4;HDAC3;HDAC4;FOXO1;MYC;JUN;TSC2;STAT3;MTOR;CASP3;RPTOR;KAT2B;CDKN1B;LRP6;CDKN1A;DEPTOR;RB1	CAV1;RPTOR	CASP3;HDAC3;KAT2B;MYC;STAT3;JUN;DEPTOR;RB1	HDAC4;AKT1S1;CDKN1B;HDAC3;PTEN;BAX;CASP3;MTOR;SIRT6;PRKDC;MYC;TSC2;JUN;STAT3;LRP6;DEPTOR;KAT2B;BAK1;RB1;KLF4;FOXO1;CDKN1A		RB1;DEPTOR;KAT2B;CASP3;JUN	BAX;LRP6;HDAC4;RB1;DEPTOR;CDKN1B;KAT2B;TSC2;FOXO1;CAV1;AKT1S1;RPTOR;CASP3;PRKDC;MTOR;TWIST1;JUN;CDKN1A;KLF4;SIRT6	ILK;FOXO1;HDAC4;SIRT6;TSC2;MYC;AKT1S1;PRKDC;CDKN1A;PTEN;MTOR;DEPTOR;CAV1;KAT2B;RPTOR;LRP6;BAX;JUN;KLF4;CDKN1B;RB1	RPTOR;KAT2B;MYC;RB1;HDAC3;CASP3;STAT3;DEPTOR;JUN	PRKDC;RPTOR;LRP6;TWIST1;CDKN1B;AKT1S1;TSC2;FOXO1;CAV1;CDKN1A;BAX;SIRT6;HDAC4;MTOR;KLF4	MTOR;FOXO1;HDAC4;PRKDC;KLF4;CDKN1B;LRP6;TSC2;CDKN1A	KLF4;BAK1;TSC2	5		11	2	5	14
GO_REGULATION_OF_PROTEIN_KINASE_ACTIVITY	4.692	9.782	5.26	10.208	12.785	13.658	12.947	5.555	12.227	6.563	17.034		7.11	18.236	18.316	5.965	11.534	7.182	1.406	CCNC;PIK3CA;RB1;DEPTOR;PDGFRB;FGFR1;SRC;KAT2B		EGFR;AKT1S1;ERBB2;KIT;CAV1;SOCS1;DEPTOR;CDKN1A;PRKAA1;RPTOR;MTOR;ERBB3;IGF1R	RPTOR;CAV1;ERBB2	EGFR;RPTOR;ERBB2;ERBB3;DEPTOR;KIT;CAV1	SHC1;BRAF;PRKAA1;TSC2;ERBB2;RET;PTEN;MTOR;MAP2K6;CDKN1B;AKT1S1;CDKN1A;MAP2K1;LRP6	TSC2;RB1;DEPTOR;PIK3CA;CDKN1B;LRP6;MTOR;CASP3;EGFR;KIT;ILK;RPTOR;EZH2;ERBB2;ERBB3;CAV1;MAP2K6		ILK;MAP2K6;ERBB2;RPTOR;MAP2K1;CDKN1B;AKT1S1;EGFR;MTOR;CAV1;CDKN1A;RET;PTEN;TSC2;LRP6;PRKAA1;BRAF		CASP3;ERBB3;CDKN1B;ERBB2;MAP2K6;RPTOR;CAV1;TSC2;EGFR;MTOR;PIK3CA;ILK;DEPTOR;RB1;KIT;LRP6	SOCS1;MTOR;CDKN1A;PRKAA1;EGFR;IGF1R;AKT1S1	PDGFRB;MAP2K1;KAT2B;LRP6;EGFR;RB1;BRAF;KIT;CASP3;CCNC;RPTOR;PIK3CA;RET;MAP2K6;FGFR1;TSC2;MTOR;CDKN1B;CDKN1A;DEPTOR	ERBB2;CAV1;RPTOR	PDGFRB;CASP3;PIK3CA;KAT2B;CCNC;SRC;ALK;DEPTOR;KIT;FGFR1;RB1	PDGFRB;BRAF;RET;AKT1S1;CDKN1B;PRKAA1;PTEN;CASP3;MTOR;MAP2K6;ERBB2;FGFR1;ALK;TSC2;LRP6;DEPTOR;KAT2B;SHC1;PIK3CA;RB1;MAP2K1;CDKN1A;CCNC;KIT;SRC		PIK3CA;SRC;KIT;DEPTOR;RB1;CASP3;RET;KAT2B;CCNC;PDGFRB;FGFR1	LRP6;RB1;CCNC;PDGFRB;PRKAA1;DEPTOR;CDKN1B;KAT2B;SRC;TSC2;PIK3CA;MAP2K1;CAV1;AKT1S1;RPTOR;TNFSF11;KIT;CASP3;MTOR;ERBB3;MAP2K6;CDKN1A;BRAF;RET;FGFR1;ERBB2	ERBB2;ILK;PDGFRB;PRKAA1;BRAF;TSC2;FGFR1;AKT1S1;CDKN1A;MTOR;DEPTOR;CAV1;KAT2B;RPTOR;PIK3CA;LRP6;SRC;MAP2K1;CCNC;MAP2K6;RET;CDKN1B;EGFR;PTEN;RB1	PIK3CA;RPTOR;PDGFRB;FGFR1;CCNC;KAT2B;RB1;CASP3;RET;KIT;DEPTOR	MAP2K1;RPTOR;LRP6;ERBB3;AKT1S1;MAP2K6;BRAF;TSC2;RET;CAV1;ERBB2;CDKN1A;TNFSF11;PRKAA1;CDKN1B;MTOR	MTOR;MAP2K1;RET;BRAF;CDKN1B;LRP6;MAP2K6;TSC2;EGFR;CDKN1A	EZH2;TSC2	8		13	3	7	14
GO_POSITIVE_REGULATION_OF_PRI_MIRNA_TRANSCRIPTION_BY_RNA_POLYMERASE_II	7.678	9.694	3.075		3.889	2.574	2.63	6.728	9.681	7.247	7.822		4.037	6.244	8.123	6.959	2.504	2.828		SMARCA4;TP53;FOS;JUN;RELA		FOS;GATA3;STAT3;TP53;JUN;RELA	FOS;RELA;TP53	STAT3;GATA3		KLF4;STAT3;RELA		KLF4;RELA		STAT3;RELA	RELA;JUN;TP53;FOS	KLF4;JUN;RELA;STAT3;FOS;SMARCA4;TP53	TP53;FOS;RELA	TP53;FOS;RELA;STAT3;JUN	STAT3;KLF4;TP53;JUN;RELA;FOS		TP53;FOS;JUN	JUN;FOS;TP53;KLF4;GATA3	SMARCA4;FOS;RELA;JUN;KLF4;TP53	FOS;TP53;RELA;STAT3;JUN	GATA3;KLF4	KLF4;SMARCA4		5		6	3	2
GO_REGULATION_OF_CATABOLIC_PROCESS	5.74	9.694	4.683	10.02	19.635	16.857	16.373	6.043	17.447	8.374	17.803		7.11	19.011	20.374	10.535	13.309	7.326	3.691	FOXK2;SMARCC1;PIK3CA;TP53;ATG7;BAD;AURKA;ULK1;MAPK8;RELA		BAD;EGFR;CAV1;MET;VIM;PRKAA1;RPTOR;ATM;STAT3;MTOR;ITGB1;TP53;PRKAB1;RELA	RELA;CAV1;BAD;RPTOR;TP53	EGFR;ATM;MET;BAD;RPTOR;STAT3;CAV1	BAX;IDH1;MET;VIM;PRKAA1;TSC2;CHEK2;PTEN;MTOR;CDKN1B;FOXO1;ITGB1;HDAC4;KDM4A;SIRT6	TSC2;VIM;MAPK8;EGFR;HDAC4;MET;SIRT6;FOXO1;PIK3CA;KDR;ITGB1;RELA;CHEK2;YWHAZ;PIAS1;PRKAB1;STAT3;ATM;CDKN1B;MTOR;CASP3;RPTOR;CAV1;BAD		SIRT6;CDKN1B;EGFR;ITGB1;CAV1;PRKAA1;CHEK2;RELA;MTOR;KDM4A;PTEN;FOXO1;BAD;RPTOR;MET;HDAC4;BAX;VIM;ATM;IDH1;TSC2		CDKN1B;STAT3;RELA;BAD;CASP3;CHEK2;TSC2;PIAS1;CAV1;MET;MAPK8;KDR;ATM;FOXO1;RPTOR;EGFR;MTOR;PIK3CA;HDAC4;SIRT6	VIM;MTOR;PRKAB1;RELA;PRKAA1;TP53;EGFR;ITGB1	HDAC4;VIM;SMARCC1;RELA;TP53;ATG7;KDM4A;FOXO1;ULK1;CHEK2;AURKA;EGFR;KDR;STAT3;CASP3;RPTOR;PIK3CA;MAPK8;ITGB1;BAD;MET;TSC2;HK2;MTOR;CDKN1B;FOXK2;PIAS1	TP53;CAV1;RPTOR;RELA	SMARCC1;TP53;KDR;FOXK2;CASP3;PIK3CA;RELA;MAPK8;BAD;ATG7;ULK1;STAT3;AURKA;CHEK2	AURKA;CHEK2;HDAC4;ITGB1;TP53;CDKN1B;PRKAA1;KDM4A;PTEN;BAX;CASP3;VIM;MTOR;SIRT6;FOXK2;TSC2;STAT3;KDR;ATG7;IDH1;PIK3CA;MAPK8;BAD;MET;FOXO1;ULK1;RELA;SMARCC1		ATG7;PIK3CA;BAD;SMARCC1;FOXK2;TP53;KDR;ULK1;AURKA;CHEK2;MAPK8;CASP3	BAX;EP300;HDAC4;TP53;KDR;CHEK2;PRKAA1;FOXK2;CDKN1B;TSC2;PIK3CA;FOXO1;CAV1;MET;RPTOR;CASP3;AURKA;MTOR;BAD;SMARCC1;ATG7;TWIST1;VIM;MAPK8;IDH1;ITGB1;SIRT6;KDM4A;ULK1	ATM;FOXO1;PRKAA1;HDAC4;SIRT6;KDM4A;TSC2;ITGB1;ATG7;MET;MTOR;CAV1;SMARCC1;RPTOR;PIK3CA;IDH1;MAPK8;RELA;AURKA;VIM;CDKN1B;EGFR;FOXK2;ULK1;BAX;BAD;PTEN;TP53;CHEK2	ATG7;PIAS1;HK2;PIK3CA;RPTOR;ULK1;MAPK8;SMARCC1;KDR;BAD;TP53;CHEK2;CASP3;RELA;STAT3;AURKA;FOXK2	TSC2;BAX;MET;HDAC4;EP300;RPTOR;TWIST1;ITGB1;FOXO1;PRKAA1;SIRT6;BAD;CHEK2;IDH1;VIM;CAV1;KDM4A;CDKN1B;MTOR	KDM4A;MTOR;CHEK2;FOXO1;HDAC4;ITGB1;VIM;CDKN1B;TSC2;EGFR;MET	ITGB1;TSC2;PRKAB1;VIM;YWHAZ	10		14	5	7	15
GO_NEGATIVE_REGULATION_OF_NUCLEOBASE_CONTAINING_COMPOUND_METABOLIC_PROCESS	9.82	9.684	4.657	8.856	13.75	9.607	12.299	5.01	21.424	9.053	18.466		5.51	21.677	19.19	10.853	17.086	10.837	3.192	FOXK2;EHMT2;RB1;TP53;SMARCA4;FGFR1;JUN;PHF2;KDM1A;STAT1;RELA;MED1;SRC;DNMT3B;MYC;KAT2B		CAV1;CDKN1A;HDAC3;DNMT1;GATA3;ATM;DNMT3B;STAT3;MTOR;SMAD2;TP53;PHF8;JUN;SQSTM1;STAT6;RELA	CAV1;SQSTM1;RELA;TP53	SMAD2;GATA3;ATM;PHF8;STAT3;DNMT1;CAV1;HDAC3	ESR1;SIRT6;CREBBP;SHC1;SMAD2;MTOR;CDKN1B;FOXO1;HDAC4;KLF4;NOTCH1;CTNNB1;CDKN1A;KDM4A;KDM5C;STAT6	SMAD2;DNMT3B;CTBP2;DNMT1;HDAC4;SIRT6;FOXO1;PHF8;MED1;CREBBP;RELA;PIAS1;STAT6;EZH2;KLF4;STAT3;ATM;CDKN1B;MTOR;RB1;CAV1;HDAC3		FOXO1;HDAC4;KDM5C;SIRT6;RELA;STAT6;CAV1;CDKN1B;CREBBP;MTOR;KDM4A;ATM;CDKN1A;CTNNB1;KLF4;NOTCH1;SMAD2		CDKN1B;CTBP2;STAT3;RELA;MED1;CREBBP;HDAC3;RB1;PHF8;STAT6;PIAS1;CAV1;DNMT1;ATM;FOXO1;MTOR;HDAC4;SIRT6;SMAD2	JUN;MTOR;CDKN1A;RELA;STAT6;TP53;DNMT3B;SQSTM1	HDAC4;RELA;KAT2B;TP53;EHMT2;KDM4A;FOXO1;KDM1A;YAP1;CREBBP;STAT1;SMARCA4;NOTCH1;STAT6;ZEB1;RB1;KLF4;MYC;JUN;KDM5A;STAT3;ESR1;SQSTM1;DNMT1;DNMT3B;HDAC3;CTNNB1;FGFR1;PHF2;CBX3;MTOR;CDKN1B;CDKN1A;FOXK2;PIAS1	TP53;SQSTM1;CAV1;RELA	KDM1A;EHMT2;TP53;PHF2;FOXK2;HDAC3;RELA;KAT2B;MYC;STAT3;SRC;STAT1;JUN;SMARCE1;FGFR1;RB1;DNMT3B	HDAC4;KDM1A;TP53;CDKN1B;STAT1;HDAC3;KDM4A;CTNNB1;MTOR;EHMT2;SIRT6;FOXK2;MYC;CREBBP;FGFR1;SMARCE1;JUN;STAT3;STAT6;KDM5C;KAT2B;NOTCH1;SHC1;SMAD2;ESR1;PHF2;RB1;DNMT3B;KLF4;FOXO1;CDKN1A;RELA;SRC		STAT1;STAT6;TP53;SRC;FOXK2;RB1;DNMT1;DNMT3B;KAT2B;FGFR1;PHF2;JUN	FGFR1;EP300;HDAC4;RB1;STAT6;TP53;ZEB1;FOXK2;DNMT1;ESR1;CDKN1B;CREBBP;KAT2B;AR;SRC;SQSTM1;FOXO1;CAV1;HDAC1;KDM5A;MED1;GATA3;DNMT3B;PHF2;SMARCC2;MTOR;TWIST1;JUN;CDKN1A;CTNNB1;SMAD2;KLF4;STAT1;SIRT6;KDM4A;NOTCH1	DNMT3B;ATM;CTNNB1;PHF2;FOXO1;SMARCA4;HDAC4;SIRT6;KDM4A;MYC;FGFR1;CDKN1A;EHMT2;KDM1A;MTOR;CAV1;MED1;KAT2B;CREBBP;NOTCH1;STAT6;RELA;SRC;FOXK2;KDM5C;SMAD2;STAT1;JUN;KLF4;CDKN1B;TP53;RB1	PIAS1;DNMT3B;RB1;RELA;DNMT1;SQSTM1;FOXK2;STAT1;STAT3;JUN;STAT6;PHF2;KDM1A;CBX3;FGFR1;KAT2B;TP53;MYC;HDAC3;EHMT2	ESR1;SMARCC2;SMAD2;SQSTM1;CTNNB1;KDM5A;CDKN1A;NOTCH1;GATA3;HDAC4;MED1;EP300;TWIST1;FOXO1;SIRT6;KLF4;ZEB1;HDAC1;AR;CAV1;CREBBP;KDM4A;STAT6;CDKN1B;MTOR	KDM4A;MTOR;NOTCH1;ESR1;FOXO1;KDM5A;HDAC4;STAT6;SMARCA4;CREBBP;KLF4;CDKN1B;CTNNB1;CDKN1A;YAP1;ZEB1	SMAD2;MED1;EZH2;DNMT3B;KLF4	16		16	4	8	16
GO_DEFENSE_RESPONSE	6.134	9.636	2.753	5.446	7.768	5.311	6.453	8.73	11.778	8.044	13.641		7.174	13.785	10.754	7.103	6.875	5.191	2.235	STAT2;RB1;TP53;ANXA1;FOS;ATG7;JUN;SRC;STAT1;MED1;STAT5A;RELA;PTGS2		STAT6;EGFR;KIT;FOS;VIM;SOCS1;BCL2L1;GATA3;ATM;STAT3;TP53;ANXA1;JUN;ITGB1;STAT4;STAT5A;RELA	RELA;FOS;CHUK;TP53	EGFR;GATA3;ATM;STAT3;BCL2L1;KIT	ESR1;CLDN1;CREBBP;SHC1;VIM;JAK1;PRKDC;ITGB1;KLF4;HDAC4;NOTCH1;STAT6;NFKBIA	BECN1;KLF4;MED1;STAT3;VIM;PIAS1;ATM;CREBBP;NFKBIA;IKBKB;EGFR;KIT;ITGB1;RELA;HDAC4;STAT6;RB1		HDAC4;VIM;RELA;STAT6;PRKDC;JAK1;EGFR;CREBBP;ATM;KLF4;NOTCH1;ITGB1;NFKBIA		CREBBP;KIT;STAT6;PIAS1;EGFR;RB1;IKBKB;STAT3;RELA;MED1;HDAC4;BECN1;NFKBIA;ATM	JUN;SOCS1;ANXA1;VIM;STAT5A;STAT4;RELA;STAT6;TP53;EGFR;FOS;ITGB1	HDAC4;VIM;RELA;STAT5A;TP53;ATG7;PRKDC;CHUK;NFKBIA;CREBBP;STAT1;EGFR;NOTCH1;STAT6;RB1;KLF4;IKBKB;JUN;KIT;STAT3;ESR1;ITGB1;STAT2;FOS;ANXA1;PTGS2;PIAS1	TP53;FOS;CHUK;RELA	STAT5A;PTGS2;TP53;FOS;STAT2;ANXA1;CHUK;RELA;ATG7;STAT4;STAT3;SRC;STAT1;JUN;KIT;RB1;IKBKB	CLDN1;HDAC4;NFKBIA;ITGB1;STAT5A;JAK1;TP53;STAT1;CHUK;VIM;STAT2;PRKDC;CREBBP;JUN;STAT3;FOS;STAT4;ATG7;STAT6;IKBKB;NOTCH1;PTGS2;SHC1;ESR1;RB1;KLF4;ANXA1;RELA;KIT;SRC		IKBKB;STAT2;STAT1;ANXA1;ATG7;STAT4;STAT6;TP53;SRC;KIT;RB1;FOS;PTGS2;STAT5A;JUN	EP300;HDAC4;RB1;STAT6;TP53;ESR1;CREBBP;SRC;CLDN1;STAT2;MED1;GATA3;STAT4;PTGS2;TNFSF11;KIT;JAK1;PRKDC;STAT5A;ATG7;JUN;VIM;NFKBIA;ANXA1;FOS;ITGB1;STAT1;KLF4;IKBKB;NOTCH1	ATM;HDAC4;ITGB1;JAK1;ATG7;PRKDC;ANXA1;FOS;MED1;CREBBP;STAT2;NOTCH1;STAT6;SRC;RELA;VIM;PTGS2;EGFR;STAT1;JUN;NFKBIA;STAT5A;KLF4;TP53;RB1	ATG7;PIAS1;STAT6;IKBKB;STAT1;FOS;KIT;CHUK;STAT5A;TP53;RB1;PTGS2;RELA;ANXA1;STAT3;STAT2;JUN	ESR1;NFKBIA;EP300;PRKDC;JAK1;ITGB1;CREBBP;TNFSF11;NOTCH1;GATA3;CLDN1;STAT6;MED1;VIM;HDAC4;KLF4	NOTCH1;ESR1;ITGB1;STAT6;HDAC4;CREBBP;PRKDC;KLF4;VIM;EGFR;NFKBIA	MED1;KLF4;VIM;ITGB1	13		17	4	6	13
GO_PROTEIN_AUTOPHOSPHORYLATION	5.511	9.557	6.712	4.106	7.296	5.191	7.903	4.248	10.423	10.015	12.707		9.099	11.496	10.745	8.193	3.838	3.511		JUN;PDGFRB;ULK1;AURKA;FGFR1;SRC		EGFR;PDGFRA;ERBB2;KIT;CAV1;ATM;MTOR;JUN;IGF1R	CAV1;ATR;ERBB2	EGFR;PDGFRA;ATM;ERBB2;KIT;CAV1	PDGFRA;ATR;ERBB2;CHEK2;MTOR	ATM;MTOR;KDR;KIT;EGFR;CHEK2;ERBB2;CAV1		CHEK2;ERBB2;MTOR;EGFR;ATM;CAV1		ERBB2;CHEK2;CAV1;EGFR;MTOR;KDR;KIT;ATM	JUN;EGFR;MTOR;IGF1R	KDR;PDGFRA;FGFR1;JUN;KIT;ULK1;PDGFRB;MTOR;CHEK2;ATR;AURKA;EGFR	ATR;ERBB2;CAV1	PDGFRB;CHEK2;KDR;ULK1;SRC;AURKA;JUN;ALK;KIT;FGFR1	AURKA;ATR;CHEK2;MTOR;PDGFRB;ERBB2;ULK1;FGFR1;ALK;JUN;KDR;PDGFRA;KIT;SRC		SRC;KIT;KDR;ULK1;AURKA;CHEK2;PDGFRB;FGFR1;JUN	JUN;KIT;SRC;CAV1;AURKA;PDGFRB;KDR;CHEK2;FGFR1;PDGFRA;ERBB2;MTOR;ULK1	ERBB2;ATM;ULK1;MTOR;PDGFRB;CAV1;SRC;JUN;AURKA;FGFR1;CHEK2;EGFR	PDGFRB;ULK1;FGFR1;KDR;CHEK2;ATR;AURKA;KIT;JUN	PDGFRA;CAV1;ERBB2;CHEK2;MTOR	MTOR;PDGFRA;EGFR;CHEK2		6		9	3	6	5
GO_T_CELL_ACTIVATION	3.177	9.552	5.224	3.733	6.181	5.575	6.845	4.35	7.192	5.314	8.849		5.681	12.107	7.491	4.893	8.321	3.426		PIK3CA;TP53;ANXA1;BAD;SRC		BAD;ERBB2;KIT;CAV1;SOCS1;GATA3;STAT3;MTOR;ANXA1;TP53;STAT6	CAV1;BAD;TP53;ERBB2	GATA3;BAD;STAT3;ERBB2;KIT;CAV1	BAX;ERBB2;PRKDC;MTOR;CTNNB1;STAT6	STAT3;PIK3CA;MTOR;CASP3;KIT;ERBB2;STAT6;CAV1;BAD		BAX;BAD;PRKDC;STAT6;ERBB2;MTOR;CTNNB1;CAV1		CASP3;ERBB2;KIT;STAT6;CAV1;MTOR;PIK3CA;STAT3;BAD	SOCS1;ANXA1;MTOR;STAT6;TP53	PRKDC;CTNNB1;BAD;KIT;STAT3;MTOR;CASP3;PIK3CA;ANXA1;STAT6;TP53;ZEB1	TP53;ERBB2;CAV1	TP53;ANXA1;CASP3;PIK3CA;BAD;STAT3;SRC;KIT	MTOR;BAD;PRKDC;STAT6;ERBB2;TP53;CTNNB1;ANXA1;PIK3CA;STAT3;KIT;BAX;CASP3;SRC		ANXA1;PIK3CA;BAD;STAT6;TP53;SRC;KIT;CASP3	BAD;BAX;TNFSF11;KIT;SRC;CASP3;PIK3CA;ANXA1;CAV1;PRKDC;STAT6;TP53;CTNNB1;ZEB1;ERBB2;GATA3;MTOR	ERBB2;ANXA1;CTNNB1;STAT6;MTOR;CAV1;BAX;SRC;BAD;TP53;PRKDC;PIK3CA	PIK3CA;STAT6;TP53;BAD;CASP3;STAT3;ANXA1;KIT	CTNNB1;ZEB1;PRKDC;CAV1;ERBB2;TNFSF11;BAX;GATA3;BAD;STAT6;MTOR	MTOR;STAT6;PRKDC;CTNNB1;ZEB1		5		11	4	6	6
GO_REGULATION_OF_ORGANELLE_ORGANIZATION	11.808	9.534	6.028	6.896	11.831	6.752	10.094	3.577	19.132	11.047	18.328		12.078	20.562	17.833	15.117	8.737	3.871	2.629	STAT2;RB1;TP53;ANXA1;PHF2;KDM1A;PDGFRB;BAD;AURKA;ULK1;MAPK8;MKI67;SRC;DNMT3B;ATG3;MYC;KAT2B		BAD;PDGFRA;MET;DNMT1;PRKAA1;GATA3;ATM;DNMT3B;MTOR;TP53;ANXA1;SQSTM1;CHEK1;BCL2L1;PHF8	CHEK1;ATR;SQSTM1;BAD;TP53	PDGFRA;GATA3;ATM;CHEK1;BAD;PHF8;MET;BCL2L1;DNMT1	BAX;MET;PDGFRA;PRKAA1;TSC2;ATR;MTOR;BAK1;CDKN1B;CTNNB1;MAP2K1;SIRT6;CHEK1	TSC2;BECN1;DNMT3B;ATG3;MAPK8;DNMT1;MET;SIRT6;PHF8;KDR;YWHAZ;BAK1;ILK;CHEK1;ATM;CDKN1B;MTOR;RB1;BAD		ILK;BAX;BAD;SIRT6;MAP2K1;MTOR;CDKN1B;ATM;TSC2;CHEK1;CTNNB1;MET;PRKAA1		CDKN1B;CHEK1;BAD;MET;TSC2;MAPK8;DNMT1;MTOR;ILK;ATG3;RB1;KDR;PHF8;BECN1;SIRT6;ATM	ANXA1;MTOR;PRKAA1;TP53;DNMT3B;SQSTM1	PDGFRB;MAP2K1;CHEK1;KAT2B;TP53;ULK1;KDM1A;AURKA;RB1;KDR;MYC;KDM5A;ATG3;SQSTM1;MAPK8;DNMT1;DNMT3B;CTNNB1;PDGFRA;SETD1A;BAD;PHF2;MET;STAT2;TSC2;HK2;MKI67;MTOR;ATR;CDKN1B;ANXA1	TP53;CHEK1;SQSTM1;ATR	KDM1A;PDGFRB;TP53;KDR;MKI67;PHF2;STAT2;ANXA1;ATG3;MAPK8;BAD;KAT2B;ULK1;MYC;SRC;AURKA;RB1;DNMT3B	AURKA;ATR;ATG3;PDGFRB;CHEK1;KDM1A;TP53;CDKN1B;PRKAA1;PDGFRA;CTNNB1;BAX;MTOR;STAT2;SIRT6;MYC;TSC2;KDR;KAT2B;BAK1;MAPK8;MKI67;BAD;PHF2;RB1;DNMT3B;MAP2K1;MET;ULK1;ANXA1;SRC		CHEK1;STAT2;ANXA1;KAT2B;BAD;TP53;SRC;RB1;MAPK8;MKI67;DNMT1;ATG3;DNMT3B;ULK1;AURKA;KDR;PDGFRB;PHF2	BAX;EP300;CHEK1;ATG3;RB1;PDGFRB;KDR;TP53;PRKAA1;MKI67;DNMT1;CDKN1B;KAT2B;SRC;TSC2;MAP2K1;SQSTM1;KDM5A;STAT2;GATA3;MET;DNMT3B;AURKA;PHF2;MTOR;BAD;TWIST1;ANXA1;CTNNB1;MAPK8;SIRT6;PDGFRA;ULK1	DNMT3B;ATM;CTNNB1;PHF2;ILK;PDGFRB;PRKAA1;SIRT6;TSC2;MYC;ANXA1;MET;KDM1A;MTOR;KAT2B;STAT2;ATG3;MAPK8;SRC;MAP2K1;AURKA;MKI67;CHEK1;ULK1;BAX;BAD;CDKN1B;TP53;RB1	DNMT3B;KDR;BAD;RB1;DNMT1;SQSTM1;ANXA1;MKI67;HK2;ATG3;MAPK8;CHEK1;ATR;PDGFRB;ULK1;PHF2;KDM1A;KAT2B;TP53;MYC;SETD1A;AURKA;STAT2	CTNNB1;PDGFRA;MAP2K1;EP300;TWIST1;KDM5A;TSC2;PRKAA1;GATA3;MET;BAX;BAD;SIRT6;SQSTM1;CDKN1B;MTOR	MTOR;PDGFRA;KDM5A;MAP2K1;CDKN1B;CTNNB1;TSC2;MET	DNMT3B;BAK1;TSC2;YWHAZ	17		15	5	9	13
GO_CELLULAR_RESPONSE_TO_EXTRACELLULAR_STIMULUS	9.484	9.488	1.852	5.183	7.229	6.335	6.507	8.56	12.897	7.323	12.585		5.192	12.671	16.102	8.127	7.199	4.584	2.209	EHMT2;TP53;JUN;FOS;ATG7;ULK1;MAPK8;MED1;ITGA4		CDKN1A;FOS;NCOA1;PRKAA1;RPTOR;MTOR;TP53;JUN;MAP1LC3B	RPTOR;FOS;TP53	RPTOR;NCOA1	NCOA1;PRKAA1;MAP1LC3A;MTOR;FOXO1;CDKN1A	MAP1LC3B;BECN1;MED1;NCOA1;MTOR;MAPK8;RPTOR;FOXO1		FOXO1;MAP1LC3A;RPTOR;MTOR;CDKN1A;NCOA1;PRKAA1		FOXO1;RPTOR;MTOR;MAPK8;BECN1;NCOA1;MED1	JUN;MTOR;MAP1LC3B;CDKN1A;PRKAA1;TP53;FOS	FOXO1;NCOA1;JUN;MAP1LC3A;ULK1;MTOR;FOS;RPTOR;CDKN1A;MAPK8;TP53;ITGA4;EHMT2;ATG7	TP53;FOS;RPTOR	EHMT2;TP53;FOS;ITGA4;MAPK8;ATG7;ULK1;JUN	NCOA1;MTOR;EHMT2;ATG7;MAP1LC3A;ITGA4;FOXO1;ULK1;CDKN1A;TP53;MAPK8;PRKAA1;JUN;FOS		ATG7;TP53;FOS;ULK1;MAPK8;JUN	MAP1LC3A;JUN;ATG7;CDKN1A;FOXO1;NCOA1;ULK1;FOS;MAPK8;TP53;MED1;PRKAA1;MTOR;RPTOR	CDKN1A;EHMT2;NCOA1;FOXO1;ULK1;MAPK8;MTOR;PRKAA1;FOS;ITGA4;JUN;MAP1LC3A;MED1;RPTOR;ATG7;TP53	ATG7;JUN;RPTOR;FOS;ULK1;MAPK8;TP53;ITGA4;EHMT2	RPTOR;MAP1LC3A;FOXO1;CDKN1A;PRKAA1;MED1;NCOA1;MTOR	MTOR;NCOA1;FOXO1;MAP1LC3A;CDKN1A	MAP1LC3B;MED1	9		9	3	2	6
GO_PROCESS_UTILIZING_AUTOPHAGIC_MECHANISM	6.97	9.297	4.02	5.469	14.197	8.646	12.811	5.36	16.723	9.372	15.013		8.814	17.534	14.833	12.242	9.195	4.211	2.673	FOXK2;PIK3CA;TP53;ATG7;BAD;ULK1;MAPK8;SRC;ATG3		BAD;MET;PRKAA1;RPTOR;ATM;STAT3;MTOR;TP53;SQSTM1;PRKAB1;MAP1LC3B	RPTOR;SQSTM1;BAD;TP53	ATM;MET;BAD;RPTOR;STAT3	MET;PRKAA1;TSC2;ITGB4;MAP1LC3A;MTOR;FOXO1;KDM4A	TSC2;MAP1LC3B;BECN1;STAT3;FOXO1;ATG3;PIK3CA;ATM;MTOR;KDR;MAPK8;CASP3;RPTOR;MET;PRKAB1;BAD		ATG12;FOXO1;MAP1LC3A;BAD;RPTOR;MTOR;KDM4A;ATM;TSC2;MET;PRKAA1		CASP3;FOXO1;RPTOR;BAD;MET;TSC2;MAPK8;MTOR;PIK3CA;ATG3;KDR;STAT3;BECN1;ATM	MTOR;MAP1LC3B;PRKAB1;PRKAA1;TP53;SQSTM1	MAP1LC3A;ATG12;TP53;ATG7;KDM4A;FOXO1;ULK1;KDR;STAT3;CASP3;RPTOR;PIK3CA;ATG3;SQSTM1;MAPK8;BAD;MET;TSC2;HK2;MTOR;FOXK2	TP53;SQSTM1;RPTOR	TP53;KDR;FOXK2;CASP3;PIK3CA;ATG3;MAPK8;BAD;ATG7;ULK1;STAT3;SRC	ATG3;TP53;PRKAA1;KDM4A;CASP3;MTOR;MAP1LC3A;FOXK2;TSC2;STAT3;KDR;ATG7;PIK3CA;MAPK8;BAD;MET;FOXO1;ULK1;ITGB4;SRC		ATG7;PIK3CA;BAD;FOXK2;TP53;SRC;ATG3;ULK1;KDR;MAPK8;CASP3	MAP1LC3A;EP300;ATG3;TP53;KDR;PRKAA1;ITGB4;FOXK2;SRC;TSC2;PIK3CA;SQSTM1;FOXO1;RPTOR;CASP3;MTOR;BAD;ATG7;MAPK8;MET;KDM4A;ULK1	ATM;FOXO1;PRKAA1;MAP1LC3A;KDM4A;TSC2;ATG7;MET;MTOR;RPTOR;PIK3CA;ATG3;ATG12;MAPK8;SRC;FOXK2;ULK1;BAD;TP53	ATG7;PIK3CA;HK2;RPTOR;ATG3;ULK1;MAPK8;KDR;ATG12;BAD;TP53;CASP3;STAT3;SQSTM1;FOXK2	EP300;ITGB4;RPTOR;MAP1LC3A;TSC2;FOXO1;KDM4A;PRKAA1;MET;BAD;SQSTM1;MTOR	KDM4A;MTOR;FOXO1;MAP1LC3A;TSC2;MET	MAP1LC3B;PRKAB1;TSC2	9		11	4	5	8
GO_REGULATION_OF_IMMUNE_SYSTEM_PROCESS	7.492	9.276	3.682	6.713	10.276	8.299	10.793	5.744	16.503	9.561	16.689		6.86	17.78	14.438	10.385	12.041	6.44		PIK3CA;RB1;ANXA1;FOS;JUN;STAT1;BAD;ITGA4;MAPK8;MED1;SRC;RELA;MYC;KAT2B		BAD;ERBB2;KIT;CDKN1A;CAV1;FOS;SOCS1;GATA3;ATM;STAT3;MTOR;ANXA1;JUN;ITGB1;STAT6;RELA	RELA;CAV1;FOS;BAD;ERBB2;CHUK	GATA3;ATM;BAD;STAT3;ERBB2;KIT;CAV1	BAX;CREBBP;SHC1;JAK1;ERBB2;PRKDC;ASH2L;MTOR;CTNNB1;ITGB1;NOTCH1;CDKN1A;STAT6;NFKBIA	MAPK8;IKBKB;NFKBIA;MED1;PIK3CA;CREBBP;ITGB1;RELA;PIAS1;KIT;ERBB2;STAT6;STAT3;ATM;MTOR;CASP3;RB1;CAV1;BAD		BAX;BAD;RELA;STAT6;PRKDC;ERBB2;MTOR;CREBBP;CAV1;ATM;CDKN1A;CTNNB1;ITGB1;NOTCH1;JAK1;NFKBIA		CASP3;CREBBP;ERBB2;KIT;STAT6;PIAS1;CAV1;MTOR;MAPK8;PIK3CA;RB1;IKBKB;STAT3;RELA;MED1;BAD;NFKBIA;ATM	JUN;SOCS1;ANXA1;MTOR;CDKN1A;RELA;STAT6;FOS;ITGB1	RELA;KAT2B;PRKDC;CHUK;NFKBIA;YAP1;CREBBP;STAT1;NOTCH1;STAT6;ZEB1;ITGA4;RB1;IKBKB;MYC;JUN;KIT;STAT3;CASP3;PIK3CA;MAPK8;ITGB1;CTNNB1;SETD1A;BAD;MTOR;FOS;ASH2L;CDKN1A;ANXA1;PIAS1	FOS;ERBB2;CHUK;CAV1;RELA	FOS;ANXA1;CHUK;CASP3;PIK3CA;ITGA4;RELA;MAPK8;BAD;KAT2B;MYC;STAT3;SRC;STAT1;JUN;KIT;RB1;IKBKB	NFKBIA;ITGB1;JAK1;CHUK;STAT1;CTNNB1;CASP3;BAX;MTOR;PRKDC;ERBB2;MYC;CREBBP;JUN;STAT3;FOS;ASH2L;STAT6;IKBKB;KAT2B;NOTCH1;SHC1;PIK3CA;MAPK8;BAD;RB1;ITGA4;CDKN1A;ANXA1;RELA;KIT;SRC		IKBKB;STAT1;ANXA1;PIK3CA;BAD;STAT6;SRC;KIT;RB1;FOS;KAT2B;MAPK8;CASP3;JUN	BAX;EP300;RB1;STAT6;ZEB1;CREBBP;KAT2B;SRC;PIK3CA;ASH2L;CAV1;HDAC1;MED1;GATA3;TNFSF11;KIT;CASP3;JAK1;PRKDC;MTOR;BAD;JUN;NFKBIA;CDKN1A;ANXA1;FOS;MAPK8;CTNNB1;ITGB1;STAT1;ERBB2;IKBKB;NOTCH1	ERBB2;ATM;CTNNB1;ITGA4;JAK1;ITGB1;MYC;PRKDC;CDKN1A;ANXA1;MTOR;CAV1;FOS;MED1;KAT2B;CREBBP;PIK3CA;NOTCH1;STAT6;MAPK8;RELA;SRC;STAT1;BAX;JUN;NFKBIA;BAD;RB1	PIK3CA;PIAS1;BAD;RB1;RELA;ANXA1;ITGA4;KIT;IKBKB;STAT1;MAPK8;STAT3;JUN;STAT6;FOS;CHUK;KAT2B;MYC;CASP3;SETD1A	CTNNB1;JAK1;CDKN1A;GATA3;NOTCH1;BAX;MED1;ASH2L;EP300;NFKBIA;PRKDC;ITGB1;TNFSF11;BAD;ZEB1;HDAC1;CAV1;CREBBP;ERBB2;STAT6;MTOR	MTOR;ASH2L;NOTCH1;ITGB1;STAT6;CREBBP;PRKDC;CTNNB1;CDKN1A;YAP1;ZEB1;NFKBIA		14		16	6	7	14
GO_EPITHELIUM_DEVELOPMENT	5.609	9.249	4.049	14.856	14.609	20.772	13.038	6.288	20.68	7.873	23.02		7.688	28.959	23.803	7.888	24.394	15.061	4.218	BRCA2;TP53;FGFR1;ANXA1;JUN;STAT1;BAD;MED1;SRC;RELA;MYC		BAD;EGFR;CDKN1A;CAV1;MET;VIM;GATA3;ATM;MTOR;SMAD2;TP53;ANXA1;JUN;STAT6;RELA	CAV1;RELA;BAD;TP53	EGFR;SMAD2;GATA3;ATM;MET;BAD;CAV1	BAX;MET;TSC2;PRKDC;SIRT6;CLDN1;SMAD2;PTEN;MTOR;CDKN1B;LRP6;ESR1;VIM;RET;ITGA5;NOTCH1;STAT6;CTNNB1;CDKN1A;KLF4;MAP2K1	TSC2;SMAD2;VIM;IKBKB;EGFR;MET;SIRT6;MED1;LRP6;KDR;RELA;STAT6;ILK;EZH2;KLF4;NCOA3;ATM;CDKN1B;MTOR;CASP3;CAV1;BAD		ITGA5;SIRT6;STAT6;CDKN1B;EGFR;TSC2;PGR;CAV1;RELA;MTOR;RET;PTEN;NOTCH1;ILK;BAD;PRKDC;KLF4;MET;LRP6;SMAD2;BAX;VIM;MAP2K1;ATM;CDKN1A;CTNNB1		CDKN1B;RELA;BAD;MED1;LRP6;CASP3;TSC2;STAT6;CAV1;MET;NCOA3;ILK;KDR;ATM;EGFR;MTOR;IKBKB;SIRT6;SMAD2	JUN;ANXA1;VIM;MTOR;CDKN1A;RELA;STAT6;TP53;EGFR	VIM;RELA;MAP2K1;LRP6;TP53;PRKDC;ITGA5;YAP1;STAT1;EGFR;NOTCH1;STAT6;ZEB1;PHGDH;KLF4;IKBKB;KDR;MYC;JUN;BRCA2;CASP3;RET;ESR1;NCOA3;CTNNB1;FGFR1;BAD;MET;TSC2;MTOR;CDKN1B;CDKN1A;ANXA1	TP53;CAV1;RELA	TP53;KDR;ANXA1;BRCA2;CASP3;RELA;BAD;PHGDH;MYC;SRC;JUN;NCOA3;FGFR1;STAT1;IKBKB	BRCA2;CLDN1;NCOA3;RET;TP53;CDKN1B;STAT1;PTEN;BAX;CASP3;CTNNB1;VIM;MTOR;SIRT6;PRKDC;MYC;FGFR1;ITGA5;TSC2;JUN;KDR;LRP6;STAT6;PHGDH;IKBKB;NOTCH1;SMAD2;ESR1;BAD;KLF4;MAP2K1;MET;CDKN1A;ANXA1;RELA;SRC		IKBKB;STAT1;ANXA1;BAD;STAT6;TP53;SRC;PHGDH;BRCA2;KDR;RET;FGFR1;CASP3;JUN	BAX;EP300;PHGDH;LRP6;STAT6;TP53;KDR;ZEB1;ESR1;CDKN1B;AR;SRC;TSC2;MAP2K1;CAV1;HDAC1;CLDN1;ITGA5;MED1;SIRT6;GATA3;MET;TNFSF11;CASP3;PRKDC;BRCA2;MTOR;BAD;TWIST1;JUN;VIM;CDKN1A;ANXA1;CTNNB1;SMAD2;KLF4;STAT1;RET;FGFR1;IKBKB;NOTCH1	ATM;CTNNB1;ILK;SIRT6;TSC2;MYC;FGFR1;PRKDC;CDKN1A;ANXA1;MET;ITGA5;MTOR;CAV1;MED1;NOTCH1;PGR;LRP6;STAT6;RELA;MAP2K1;SRC;BRCA2;RET;VIM;CDKN1B;EGFR;SMAD2;STAT1;BAX;JUN;BAD;KLF4;PTEN;TP53	STAT6;NCOA3;IKBKB;STAT1;FGFR1;KDR;BAD;BRCA2;TP53;MYC;PHGDH;CASP3;RELA;ANXA1;RET;JUN	ESR1;MAP2K1;SMAD2;ITGA5;CTNNB1;TSC2;CDKN1A;NOTCH1;GATA3;MET;BAX;MED1;EP300;PRKDC;LRP6;TWIST1;RET;TNFSF11;SIRT6;CLDN1;BAD;VIM;KLF4;ZEB1;HDAC1;AR;CAV1;STAT6;CDKN1B;MTOR	MTOR;NOTCH1;ESR1;RET;CTNNB1;EGFR;CDKN1A;MAP2K1;VIM;TSC2;MET;KLF4;ZEB1;STAT6;PRKDC;CDKN1B;LRP6;ITGA5;YAP1	SMAD2;MED1;EZH2;TSC2;KLF4;VIM	11		15	4	7	21
GO_CELL_CYCLE_PROCESS	8.354	9.23	4.916	9.434	13.492	13.491	10.833	5.272	18.517	9.672	17.709		8.637	16.857	22.598	11.577	9.317	8.134	3.33	EHMT2;BRCA2;RB1;TP53;FGFR1;ANXA1;RRM2;PDGFRB;AURKA;MKI67;MED1;EIF4EBP1;MYC;KAT2B		EGFR;RPS6KB1;CDKN1A;HDAC3;PRKAA1;RPTOR;ATM;MTOR;ITGB1;ANXA1;CHEK1;TP53;PRKAB1;BCL2L1;PHF8	RPTOR;CHEK1;TP53	EGFR;ATM;CHEK1;RPS6KB1;PHF8;RPTOR;BCL2L1;HDAC3	BAX;PRKAA1;CHEK2;PRKDC;PTEN;RPS6KB1;MTOR;MAP2K6;CDKN1B;ITGB1;KLF4;MAP2K1;NOTCH1;CTNNB1;CDKN1A;CHEK1	BECN1;EIF4EBP1;MAP2K6;EGFR;MED1;PHF8;ITGB1;CHEK2;RPS6KB1;PIAS1;ILK;PRKAB1;EZH2;KLF4;CHEK1;ATM;CDKN1B;MTOR;RPTOR;RB1;HDAC3		CDKN1B;EGFR;ITGB1;PRKAA1;CHEK2;MAP2K6;MTOR;PTEN;CHEK1;NOTCH1;ILK;PRKDC;RPTOR;KLF4;BAX;MAP2K1;ATM;RPS6KB1;CDKN1A;CTNNB1		RPS6KB1;CDKN1B;CHEK1;MAP2K6;RPTOR;PIAS1;CHEK2;EGFR;MTOR;ILK;HDAC3;RB1;EIF4EBP1;PHF8;BECN1;MED1;ATM	ANXA1;MTOR;PRKAB1;CDKN1A;PRKAA1;TP53;EGFR;ITGB1	PDGFRB;MAP2K1;CHEK1;KAT2B;TP53;EHMT2;PRKDC;CHEK2;AURKA;EGFR;NOTCH1;RB1;RRM2;PHGDH;KLF4;MYC;BRCA2;RPTOR;ITGB1;RPS6KB1;HDAC3;CTNNB1;MAP2K6;FGFR1;CBX3;MTOR;MKI67;CDKN1B;CDKN1A;ANXA1;PIAS1	TP53;CHEK1;RPTOR	RRM2;EHMT2;PDGFRB;TP53;MKI67;BRCA2;RPS6KB1;ANXA1;HDAC3;KAT2B;EIF4EBP1;PHGDH;MYC;AURKA;CHEK2;FGFR1;RB1	AURKA;CHEK2;BRCA2;PDGFRB;CHEK1;ITGB1;TP53;CDKN1B;PRKAA1;HDAC3;PTEN;CTNNB1;BAX;MTOR;EHMT2;PRKDC;MAP2K6;MYC;FGFR1;EIF4EBP1;RPS6KB1;PHGDH;KAT2B;NOTCH1;RRM2;MKI67;RB1;KLF4;MAP2K1;CDKN1A;ANXA1		CHEK1;ANXA1;EIF4EBP1;TP53;RB1;AURKA;RPS6KB1;MKI67;PHGDH;RRM2;BRCA2;KAT2B;CHEK2;PDGFRB;FGFR1	RPS6KB1;FGFR1;BAX;EP300;PHGDH;CHEK1;RB1;PDGFRB;TP53;CHEK2;PRKAA1;MKI67;CDKN1B;KAT2B;MAP2K1;MED1;RPTOR;RRM2;PRKDC;AURKA;EIF4EBP1;MTOR;MAP2K6;CDKN1A;ANXA1;CTNNB1;ITGB1;BRCA2;KLF4;NOTCH1	ATM;CTNNB1;ILK;PDGFRB;PRKAA1;EIF4EBP1;ITGB1;MYC;FGFR1;PRKDC;CDKN1A;ANXA1;EHMT2;RPS6KB1;MTOR;MED1;KAT2B;RPTOR;NOTCH1;MAP2K1;MAP2K6;MKI67;BRCA2;AURKA;CDKN1B;CHEK1;EGFR;RRM2;BAX;CHEK2;KLF4;PTEN;TP53;RB1	PIAS1;RB1;ANXA1;MKI67;RRM2;CHEK2;CHEK1;PHGDH;PDGFRB;BRCA2;CBX3;RPTOR;FGFR1;KAT2B;TP53;MYC;RPS6KB1;HDAC3;AURKA;EHMT2	CTNNB1;EP300;MAP2K1;PRKDC;RPTOR;CDKN1B;ITGB1;MAP2K6;RPS6KB1;CDKN1A;PRKAA1;BAX;NOTCH1;CHEK2;MED1;MTOR;KLF4	MTOR;NOTCH1;CHEK2;ITGB1;MAP2K1;PRKDC;KLF4;CDKN1B;CTNNB1;MAP2K6;CDKN1A;RPS6KB1;EGFR	ITGB1;MED1;EZH2;KLF4;PRKAB1	14		15	3	8	16
GO_NEUROGENESIS	7.3	9.016	4.381	7.343	11.896	8.947	7.634	5.636	15.06	10.225	18.057		6.655	17.272	15.884	7.467	10.76	8.125	4.619	PIK3CA;RB1;TP53;FGFR1;ANXA1;JUN;KDM1A;RELA;AURKA;ULK1;MED1;SRC;DNMT3B;ITGA4		EGFR;ERBB2;KIT;NCOA1;MET;VIM;GATA3;DNMT3B;STAT3;MTOR;TP53;ANXA1;ERBB3;JUN;ITGB1;RELA	RELA;TP53;ERBB2	EGFR;GATA3;MET;NCOA1;STAT3;ERBB3;ERBB2;KIT	NCOA1;BAX;MET;SHC1;LRP6;VIM;ERBB2;RET;PTEN;MTOR;CTNNB1;ITGB1;KLF4;MAP2K1;NOTCH1	DNMT3B;NCOA1;RB1;VIM;EGFR;MET;MED1;PIK3CA;LRP6;ITGB1;RELA;YWHAZ;KIT;ERBB2;ILK;EZH2;KLF4;STAT3;MTOR;CASP3;ERBB3		ILK;BAX;VIM;ERBB2;RELA;MAP2K1;MTOR;EGFR;NCOA1;RET;PTEN;CTNNB1;KLF4;MET;NOTCH1;LRP6;ITGB1		CASP3;ERBB3;ERBB2;KIT;MET;EGFR;MTOR;PIK3CA;ILK;RB1;STAT3;RELA;NCOA1;MED1;LRP6	JUN;ANXA1;VIM;MTOR;RELA;TP53;DNMT3B;EGFR;ITGB1	VIM;RELA;MAP2K1;LRP6;TP53;ULK1;KDM1A;YAP1;AURKA;EGFR;NOTCH1;ZEB1;ITGA4;RB1;PHGDH;KLF4;JUN;KIT;STAT3;CASP3;PIK3CA;RET;ITGB1;DNMT3B;CTNNB1;FGFR1;NCOA1;MET;MTOR;ANXA1	TP53;ERBB2;RELA	KDM1A;TP53;CASP3;ULK1;STAT3;SRC;SMARCE1;KIT;FGFR1;DNMT3B;ITGA4;RELA;AURKA;JUN;ALK;ANXA1;PHGDH;RB1;PIK3CA	AURKA;ITGB1;RET;KDM1A;TP53;PTEN;BAX;CASP3;CTNNB1;NCOA1;MTOR;VIM;ERBB2;FGFR1;ALK;SMARCE1;JUN;STAT3;LRP6;PHGDH;NOTCH1;SHC1;PIK3CA;RB1;DNMT3B;KLF4;MAP2K1;ITGA4;MET;ULK1;ANXA1;RELA;KIT;SRC		ANXA1;PIK3CA;TP53;SRC;KIT;RB1;PHGDH;DNMT3B;ULK1;RET;AURKA;FGFR1;CASP3;JUN	BAX;EP300;PHGDH;LRP6;RB1;TP53;ZEB1;SRC;PIK3CA;MAP2K1;HDAC1;NOTCH1;MED1;GATA3;MET;DNMT3B;KIT;CASP3;AURKA;MTOR;ERBB3;TWIST1;JUN;VIM;NCOA1;ANXA1;CTNNB1;KLF4;ITGB1;RET;FGFR1;ERBB2;ULK1	ERBB2;DNMT3B;NCOA1;CTNNB1;ILK;ITGA4;ITGB1;FGFR1;ANXA1;MET;KDM1A;MTOR;MED1;PIK3CA;NOTCH1;LRP6;RELA;MAP2K1;SRC;AURKA;RET;VIM;EGFR;ULK1;BAX;JUN;KLF4;PTEN;TP53;RB1	PIK3CA;ULK1;DNMT3B;FGFR1;KDM1A;TP53;RB1;PHGDH;CASP3;RELA;ANXA1;STAT3;ITGA4;AURKA;RET;KIT;JUN	MAP2K1;NCOA1;CTNNB1;GATA3;NOTCH1;MET;BAX;MED1;EP300;LRP6;TWIST1;ERBB3;ITGB1;RET;VIM;KLF4;ZEB1;HDAC1;ERBB2;MTOR	MTOR;NOTCH1;NCOA1;ITGB1;MAP2K1;RET;KLF4;VIM;LRP6;CTNNB1;MET;EGFR;YAP1;ZEB1	ITGB1;MED1;EZH2;DNMT3B;KLF4;VIM;YWHAZ	14		16	3	8	15
GO_RESPONSE_TO_INORGANIC_SUBSTANCE	10.304	8.997	3.924	8.434	12.555	10.676	9.897	6.392	18.594	14.053	23.066		13.502	19.33	19.219	13.086	7.783	6.136	2.613	ANXA1;JUN;FOS;ATG7;PDGFRB;STAT1;BAD;LDHA;MAPK8;SRC;RELA;PTGS2		BAD;EGFR;KIT;CAV1;FOS;MET;PRKAA1;ANXA1;JUN;STAT6;RELA	RELA;CAV1;FOS;BAD;CHUK	EGFR;MET;BAD;KIT;CAV1	CLDN1;MET;BRAF;PRKAA1;MAP1LC3A;PTEN;CDKN1B;BAK1;FOXO1;KLF4;STAT6	KLF4;FOXO1;CDKN1B;KDR;MAPK8;BAK1;CASP3;EGFR;KIT;EZH2;RELA;MET;STAT6;CAV1;BAD		FOXO1;MAP1LC3A;BAD;RELA;STAT6;CAV1;CDKN1B;EGFR;PTEN;KLF4;MET;PRKAA1;BRAF		CASP3;CDKN1B;FOXO1;KIT;STAT6;CAV1;MET;EGFR;MAPK8;KDR;RELA;BAD	JUN;ANXA1;RELA;PRKAA1;STAT6;EGFR;FOS	RELA;MAP1LC3A;PDGFRB;ATG7;FOXO1;CHUK;STAT1;EGFR;STAT6;LDHA;KLF4;BRAF;KDR;JUN;KIT;CASP3;MAPK8;BAD;MET;FOS;CDKN1B;ANXA1;PTGS2	FOS;CAV1;CHUK;RELA	PTGS2;PDGFRB;KDR;FOS;ANXA1;LDHA;CASP3;CHUK;RELA;MAPK8;BAD;ATG7;SRC;JUN;KIT;STAT1	CLDN1;PDGFRB;BRAF;CHUK;CDKN1B;STAT1;PRKAA1;LDHA;PTEN;CASP3;MAP1LC3A;JUN;KDR;FOS;ATG7;STAT6;PTGS2;BAK1;MAPK8;BAD;KLF4;MET;FOXO1;ANXA1;RELA;KIT;SRC		LDHA;STAT1;ANXA1;ATG7;BAD;STAT6;SRC;KIT;MAPK8;FOS;KDR;PTGS2;PDGFRB;CASP3;JUN	MAP1LC3A;STAT6;PDGFRB;KDR;PRKAA1;CDKN1B;SRC;FOXO1;CAV1;CLDN1;PTGS2;KIT;CASP3;BAD;ATG7;JUN;BRAF;ANXA1;FOS;MAPK8;KLF4;STAT1;MET;LDHA	FOXO1;PDGFRB;PRKAA1;MAP1LC3A;BRAF;ATG7;ANXA1;MET;CAV1;FOS;STAT6;MAPK8;RELA;SRC;KLF4;CDKN1B;PTGS2;EGFR;STAT1;JUN;BAD;LDHA;PTEN	ATG7;STAT6;STAT1;LDHA;MAPK8;FOS;PDGFRB;KDR;CHUK;BAD;PTGS2;CASP3;RELA;ANXA1;KIT;JUN	MAP1LC3A;BRAF;CAV1;FOXO1;PRKAA1;MET;CLDN1;BAD;STAT6;CDKN1B;KLF4	FOXO1;STAT6;KLF4;BRAF;CDKN1B;MAP1LC3A;EGFR;MET	EZH2;KLF4;BAK1	12		11	5	5	11
GO_RESPONSE_TO_GAMMA_RADIATION	5.411	8.985	4.42	10.505	3.575	8.658	2.43	4.591	12.293	6.667	15.805		3.741	10.424	14.438	8.09	8.368	5.67		TP53;KDM1A;BRCA2;MYC		CDKN1A;PRKAA1;ATM;GATA3;TP53;BCL2L1	ATR;TP53	ATM;BCL2L1;GATA3	BAX;PRKAA1;ATR;CHEK2;PRKDC;BAK1;CDKN1A	CHEK2;ATM;BAK1		CHEK2;BAX;PRKDC;ATM;CDKN1A;PRKAA1		CHEK2;ATM	CDKN1A;PRKAA1;TP53	PRKDC;MYC;BRCA2;KDM1A;CHEK2;ATR;YAP1;CDKN1A;TP53	TP53;ATR	KDM1A;TP53;BRCA2;MYC;CHEK2	ATR;CHEK2;BRCA2;PRKDC;TP53;MYC;CDKN1A;BAK1;PRKAA1;BAX;KDM1A		CHEK2;TP53;BRCA2	BAX;CDKN1A;PRKDC;TP53;CHEK2;BRCA2;PRKAA1;GATA3	CDKN1A;ATM;KDM1A;BAX;PRKAA1;BRCA2;MYC;TP53;PRKDC;CHEK2	KDM1A;TP53;MYC;CHEK2;BRCA2;ATR	PRKDC;CDKN1A;PRKAA1;BAX;GATA3;CHEK2	CDKN1A;YAP1;CHEK2;PRKDC		4		6	2	3	7
GO_PRI_MIRNA_TRANSCRIPTION_BY_RNA_POLYMERASE_II	7.12	8.985	2.87	2.388	5.034	3.707	3.769	6.33	10.53	6.667	8.694		3.741	7.166	9.061	6.381	3.588	4.041		SMARCA4;TP53;FOS;JUN;RELA		FOS;GATA3;STAT3;TP53;JUN;RELA	FOS;RELA;TP53	STAT3;GATA3	HDAC4;KLF4	HDAC4;KLF4;STAT3;RELA		KLF4;HDAC4;RELA		STAT3;RELA;HDAC4	RELA;JUN;TP53;FOS	KLF4;HDAC4;JUN;RELA;STAT3;FOS;SMARCA4;TP53	TP53;FOS;RELA	TP53;FOS;RELA;STAT3;JUN	STAT3;KLF4;HDAC4;TP53;JUN;RELA;FOS		TP53;FOS;JUN	JUN;HDAC4;FOS;TP53;KLF4;GATA3	SMARCA4;FOS;HDAC4;RELA;JUN;KLF4;TP53	FOS;TP53;RELA;STAT3;JUN	HDAC4;GATA3;KLF4	KLF4;HDAC4;SMARCA4		5		6	3	2	2
GO_CELL_CYCLE_G1_S_PHASE_TRANSITION	6.346	8.982	5.033	8.504	13.478	12.63	10.093	5.272	14.73	8.126	14.364		7.265	14.463	19.428	8.871	9.264	8.125	3.177	RB1;TP53;ANXA1;RRM2;AURKA;EIF4EBP1;MYC		EGFR;RPS6KB1;CDKN1A;ATM;RPTOR;ANXA1;TP53;ITGB1;PHF8	RPTOR;TP53	EGFR;ATM;RPS6KB1;PHF8;RPTOR	BAX;CHEK2;PRKDC;PTEN;RPS6KB1;CDKN1B;CDKN1A;ITGB1;KLF4	KLF4;EIF4EBP1;PHF8;PIAS1;ATM;CDKN1B;EGFR;RPTOR;ITGB1;CHEK2;RPS6KB1;RB1;EZH2		CHEK2;BAX;PRKDC;RPTOR;CDKN1B;EGFR;ATM;RPS6KB1;CDKN1A;PTEN;KLF4;ITGB1		RPS6KB1;CDKN1B;RPTOR;PIAS1;CHEK2;EGFR;EIF4EBP1;RB1;PHF8;ATM	ANXA1;CDKN1A;TP53;EGFR;ITGB1	RRM2;PRKDC;KLF4;MYC;RPTOR;CHEK2;CDKN1B;AURKA;EGFR;CDKN1A;ITGB1;RPS6KB1;TP53;ANXA1;RB1;PIAS1	TP53;RPTOR	RRM2;TP53;ANXA1;RPS6KB1;EIF4EBP1;MYC;AURKA;CHEK2;RB1	AURKA;CHEK2;RB1;PRKDC;KLF4;ITGB1;MYC;CDKN1B;CDKN1A;TP53;ANXA1;RPS6KB1;EIF4EBP1;RRM2;PTEN;BAX		ANXA1;EIF4EBP1;TP53;RB1;RPS6KB1;RRM2;AURKA;CHEK2	RRM2;RPS6KB1;CDKN1B;BAX;EP300;CDKN1A;ANXA1;RB1;PRKDC;AURKA;TP53;CHEK2;ITGB1;EIF4EBP1;KLF4;RPTOR	ATM;EIF4EBP1;ITGB1;MYC;PRKDC;CDKN1A;ANXA1;RPTOR;KLF4;AURKA;CDKN1B;EGFR;RRM2;BAX;CHEK2;RPS6KB1;PTEN;TP53;RB1	PIAS1;RPTOR;RRM2;TP53;RB1;CHEK2;MYC;RPS6KB1;ANXA1;AURKA	EP300;PRKDC;RPTOR;ITGB1;RPS6KB1;CDKN1A;BAX;CHEK2;CDKN1B;KLF4	CHEK2;ITGB1;PRKDC;KLF4;CDKN1B;RPS6KB1;CDKN1A;EGFR	EZH2;KLF4;ITGB1	7		9	2	5	9
GO_CELL_MOTILITY	3.412	8.893	6.085	9.011	6.382	8.812	5.843	3.802	8.945	4.476	13.215		4.293	14.244	11.978	3.902	10.597	6.169		PIK3CA;ANXA1;JUN;PDGFRB;STAT5A;FGFR1;SRC;PTGS2;ITGA4		EGFR;PDGFRA;ERBB2;KIT;CAV1;MET;GATA3;ATM;STAT3;MTOR;ANXA1;ERBB3;JUN;ITGB1;IGF1R;STAT5A		EGFR;PDGFRA;GATA3;ATM;MET;STAT3;ERBB3;ERBB2;KIT;CAV1	CLDN1;BAX;MET;SHC1;PDGFRA;ITGB4;ERBB2;RET;ITGA5;PTEN;MTOR;CTNNB1;ITGB1;KLF4;MAP2K1;HDAC4;NOTCH1	KLF4;STAT3;PIK3CA;ATM;MTOR;KDR;EGFR;KIT;ITGB1;ILK;HDAC4;ERBB2;MET;ERBB3;CAV1		ILK;HDAC4;BAX;ITGA5;ERBB2;MAP2K1;CAV1;MTOR;EGFR;ATM;RET;PTEN;CTNNB1;KLF4;MET;NOTCH1;ITGB1		ERBB3;ERBB2;CAV1;MET;EGFR;MTOR;PIK3CA;ILK;KDR;STAT3;HDAC4;KIT;ATM	JUN;ANXA1;STAT5A;MTOR;EGFR;IGF1R;ITGB1	HDAC4;PDGFRB;MAP2K1;STAT5A;ITGA5;EGFR;NOTCH1;ITGA4;KLF4;KDR;JUN;KIT;STAT3;PIK3CA;RET;ITGB1;CTNNB1;PDGFRA;FGFR1;MET;MTOR;ANXA1;PTGS2		STAT5A;PTGS2;PDGFRB;KDR;ANXA1;PIK3CA;ITGA4;STAT3;SRC;JUN;KIT;FGFR1	CLDN1;PDGFRB;HDAC4;RET;STAT5A;ITGB1;PDGFRA;PTEN;CTNNB1;BAX;MTOR;ERBB2;FGFR1;ITGA5;JUN;STAT3;KDR;NOTCH1;PTGS2;SHC1;PIK3CA;KLF4;MAP2K1;ITGA4;MET;ITGB4;ANXA1;KIT;SRC		FGFR1;ANXA1;PIK3CA;SRC;KIT;RET;KDR;PTGS2;PDGFRB;STAT5A;JUN	FGFR1;BAX;HDAC4;PDGFRB;KDR;ITGB4;SRC;PIK3CA;MAP2K1;CAV1;CLDN1;ITGA5;GATA3;PTGS2;TNFSF11;KIT;STAT5A;MTOR;ERBB3;TWIST1;JUN;ANXA1;CTNNB1;KLF4;ITGB1;RET;MET;PDGFRA;ERBB2;NOTCH1	ERBB2;ATM;CTNNB1;ILK;PDGFRB;HDAC4;ITGA4;ITGB1;FGFR1;ANXA1;MET;ITGA5;MTOR;CAV1;PIK3CA;NOTCH1;SRC;MAP2K1;RET;PTGS2;EGFR;BAX;JUN;STAT5A;KLF4;PTEN	PIK3CA;PDGFRB;FGFR1;KDR;STAT5A;PTGS2;ANXA1;STAT3;ITGA4;RET;KIT;JUN	MAP2K1;ITGA5;CTNNB1;GATA3;NOTCH1;MET;BAX;HDAC4;PDGFRA;TWIST1;ERBB3;ITGB1;RET;TNFSF11;CLDN1;KLF4;ITGB4;CAV1;ERBB2;MTOR	MTOR;NOTCH1;PDGFRA;HDAC4;ITGB1;MAP2K1;EGFR;RET;KLF4;CTNNB1;ITGA5;MET		9		16		10	17
GO_INOSITOL_LIPID_MEDIATED_SIGNALING	3.606	8.808	8.84	5.703	10.864	5.691	10.063	2.083	8.834	6.706	11.219		7.044	14.06	9.14	5.129	7.949	5.041	2.366	PDGFRB;FGFR1;SRC;PIK3CA		EGFR;PDGFRA;RPS6KB1;ERBB2;KIT;GATA3;ERBB3;IGF1R		EGFR;PDGFRA;GATA3;RPS6KB1;ERBB3;ERBB2;KIT	PDGFRA;TSC2;ERBB2;PTEN;RPS6KB1;KLF4	TSC2;BECN1;KLF4;PIK3CA;KDR;EGFR;KIT;ERBB2;ERBB3;RPS6KB1		ERBB2;EGFR;RPS6KB1;PTEN;TSC2;KLF4		RPS6KB1;ERBB3;ERBB2;KIT;TSC2;EGFR;PIK3CA;KDR;BECN1	EGFR;IGF1R	KLF4;KDR;PDGFRA;FGFR1;KIT;TSC2;PDGFRB;PIK3CA;EGFR;RPS6KB1		PDGFRB;KDR;RPS6KB1;PIK3CA;SRC;KIT;FGFR1	PDGFRB;KLF4;ERBB2;FGFR1;TSC2;PIK3CA;RPS6KB1;KDR;PDGFRA;PTEN;KIT;SRC		PIK3CA;SRC;KIT;RPS6KB1;KDR;PDGFRB;FGFR1	ERBB3;RPS6KB1;FGFR1;TWIST1;KIT;SRC;TSC2;PIK3CA;PDGFRB;KDR;KLF4;PDGFRA;ERBB2;GATA3	ERBB2;FGFR1;PDGFRB;SRC;KLF4;TSC2;RPS6KB1;PTEN;PIK3CA;EGFR	PIK3CA;PDGFRB;FGFR1;KDR;RPS6KB1;KIT	PDGFRA;TWIST1;ERBB3;TSC2;RPS6KB1;ERBB2;GATA3;KLF4	PDGFRA;KLF4;RPS6KB1;TSC2;EGFR	KLF4;TSC2	4		8		7	6
GO_SYMBIOTIC_PROCESS	7.808	8.759	5.775	10.203	12.573	12.274	10.55	4.102	18.888	8.544	19.224		7.246	19.355	18.488	8.717	12.4	9.661	2.916	STAT2;RB1;SMARCA4;TP53;JUN;ATG7;STAT1;BAD;ULK1;SRC;RELA;KAT2B		BAD;EGFR;PDGFRA;CAV1;MET;VIM;RPTOR;STAT3;TP53;JUN;ITGB1;BCL2L1;RELA	RELA;CAV1;BAD;RPTOR;TP53	EGFR;PDGFRA;MET;BAD;RPTOR;STAT3;BCL2L1;CAV1	CLDN1;BAX;CREBBP;MET;PDGFRA;VIM;SHC1;TSC2;ITGA5;BAK1;CTNNB1;ITGB1;NOTCH1;KDM4A;NFKBIA	TSC2;BECN1;STAT3;VIM;CTBP2;NFKBIA;IKBKB;CREBBP;EGFR;KDR;ITGB1;BAK1;RELA;RPTOR;MET;RB1;CAV1;BAD		ATG12;BAX;BAD;ITGA5;RELA;VIM;RPTOR;CREBBP;EGFR;KDM4A;TSC2;CTNNB1;ITGB1;MET;NOTCH1;CAV1;NFKBIA		RPTOR;BAD;CAV1;MET;EGFR;TSC2;CTBP2;RB1;STAT3;RELA;KDR;IKBKB;BECN1;NFKBIA;CREBBP	JUN;VIM;RELA;TP53;EGFR;ITGB1	VIM;RELA;KAT2B;ATG12;TP53;ATG7;KDM4A;ITGA5;ULK1;NFKBIA;CREBBP;STAT1;EGFR;SMARCA4;NOTCH1;RB1;IKBKB;KDR;JUN;STAT3;RPTOR;ITGB1;CTNNB1;PDGFRA;BAD;MET;TSC2;STAT2	TP53;CAV1;RPTOR;RELA	TP53;KDR;STAT2;RELA;KAT2B;BAD;ATG7;ULK1;STAT3;SRC;STAT1;JUN;RB1;IKBKB	CLDN1;NFKBIA;ITGB1;TP53;STAT1;KDM4A;PDGFRA;BAX;CTNNB1;VIM;STAT2;CREBBP;ITGA5;TSC2;JUN;STAT3;KDR;ATG7;IKBKB;KAT2B;NOTCH1;SHC1;BAK1;BAD;RB1;MET;ULK1;RELA;SRC		IKBKB;STAT2;STAT1;ATG7;BAD;TP53;SRC;RB1;ULK1;KAT2B;KDR;JUN	BAX;EP300;RB1;TP53;KDR;CREBBP;KAT2B;SRC;TSC2;CAV1;HDAC1;CLDN1;NOTCH1;STAT2;ITGA5;RPTOR;BAD;ATG7;JUN;VIM;NFKBIA;CTNNB1;ITGB1;STAT1;MET;PDGFRA;IKBKB;KDM4A;ULK1	CTNNB1;SMARCA4;TSC2;KDM4A;ITGB1;ATG7;MET;ITGA5;CAV1;KAT2B;CREBBP;STAT2;RPTOR;NOTCH1;ATG12;RELA;SRC;VIM;EGFR;ULK1;STAT1;BAX;JUN;NFKBIA;BAD;TP53;RB1	ATG7;RPTOR;IKBKB;STAT1;ULK1;KDR;ATG12;KAT2B;BAD;RB1;TP53;RELA;STAT3;STAT2;JUN	CTNNB1;PDGFRA;NFKBIA;EP300;RPTOR;HDAC1;ITGB1;TSC2;CAV1;CREBBP;KDM4A;NOTCH1;MET;BAX;CLDN1;BAD;VIM;ITGA5	KDM4A;NOTCH1;PDGFRA;SMARCA4;ITGB1;EGFR;CREBBP;VIM;CTNNB1;TSC2;ITGA5;MET;NFKBIA	TSC2;ITGB1;BAK1;VIM	12		13	5	8	15
GO_NEGATIVE_REGULATION_OF_CELL_CYCLE	5.44	8.661	4.768	12.94	10.885	16.816	8.356	5.071	19.083	6.612	18.466		6.082	17.398	22.25	10.274	11.966	9.397	2.537	EHMT2;RB1;TP53;RRM2;AURKA;PTGS2;MYC;KAT2B		EGFR;CDKN1A;PRKAA1;PRKAB1;GATA3;RPTOR;ATM;MTOR;TP53;CHEK1;BCL2L1	RPTOR;CHEK1;ATR;TP53	EGFR;GATA3;ATM;CHEK1;RPTOR;BCL2L1	BAX;PRKAA1;ATR;CHEK2;PRKDC;PTEN;MTOR;MAP2K6;CDKN1B;KLF4;NOTCH1;MAP2K1;CTNNB1;CDKN1A;CHEK1	KLF4;CHEK1;RB1;ATM;CDKN1B;MTOR;CASP3;EGFR;RPTOR;EZH2;CHEK2;ILK;PRKAB1;MAP2K6		CHEK2;MAP2K6;ILK;BAX;PRKDC;RPTOR;MAP2K1;CDKN1B;EGFR;MTOR;ATM;CDKN1A;PTEN;CTNNB1;KLF4;NOTCH1;CHEK1;PRKAA1		CASP3;CDKN1B;CHEK1;MAP2K6;RPTOR;CHEK2;EGFR;MTOR;ILK;RB1;ATM	MTOR;PRKAB1;CDKN1A;PRKAA1;TP53;EGFR	MAP2K1;CHEK1;KAT2B;TP53;EHMT2;PRKDC;CHEK2;AURKA;EGFR;NOTCH1;RB1;RRM2;KLF4;MYC;CASP3;RPTOR;CTNNB1;MAP2K6;CBX3;MTOR;ATR;CDKN1B;CDKN1A;PTGS2	TP53;CHEK1;ATR;RPTOR	RRM2;EHMT2;PTGS2;TP53;CASP3;KAT2B;MYC;AURKA;CHEK2;RB1	AURKA;ATR;CHEK2;CHEK1;TP53;CDKN1B;PRKAA1;PTEN;CTNNB1;CASP3;BAX;MTOR;EHMT2;PRKDC;MAP2K6;MYC;KAT2B;NOTCH1;PTGS2;RRM2;RB1;KLF4;MAP2K1;CDKN1A		CHEK1;TP53;RB1;AURKA;RRM2;KAT2B;CHEK2;PTGS2;CASP3	BAX;EP300;CHEK1;RB1;TP53;CHEK2;PRKAA1;CDKN1B;KAT2B;MAP2K1;GATA3;RPTOR;RRM2;PTGS2;CASP3;PRKDC;AURKA;MTOR;MAP2K6;CDKN1A;CTNNB1;KLF4;NOTCH1	ATM;CTNNB1;ILK;PRKAA1;MYC;PRKDC;CDKN1A;EHMT2;MTOR;KAT2B;RPTOR;NOTCH1;MAP2K1;MAP2K6;AURKA;CDKN1B;CHEK1;PTGS2;EGFR;RRM2;BAX;CHEK2;KLF4;PTEN;TP53;RB1	RPTOR;RRM2;KAT2B;TP53;RB1;CHEK2;MYC;PTGS2;CHEK1;CASP3;ATR;CBX3;AURKA;EHMT2	CTNNB1;EP300;MAP2K1;PRKDC;RPTOR;CDKN1B;MAP2K6;CDKN1A;PRKAA1;GATA3;NOTCH1;BAX;CHEK2;MTOR;KLF4	MTOR;NOTCH1;CHEK2;MAP2K1;PRKDC;KLF4;CDKN1B;CTNNB1;MAP2K6;CDKN1A;EGFR	EZH2;KLF4;PRKAB1	8		11	4	6	15
GO_POSITIVE_REGULATION_OF_EPITHELIAL_CELL_PROLIFERATION	7.247	8.661	5.637	5.599	9.226	8.217	9.905	4.49	14.011	7.917	13.71		4.423	15.212	14.431	8.803	12.058	4.95		FGFR1;JUN;BAD;ITGA4;MED1;STAT5A;MYC		BAD;EGFR;ERBB2;RPTOR;STAT3;MTOR;JUN;STAT5A	RPTOR;BAD;ERBB2	EGFR;BAD;RPTOR;STAT3;ERBB2	CLDN1;ERBB2;MTOR;CTNNB1;NOTCH1;SIRT6	MED1;STAT3;MTOR;KDR;EGFR;RPTOR;ERBB2;SIRT6;BAD		BAD;SIRT6;ERBB2;RPTOR;MTOR;EGFR;CTNNB1;NOTCH1		ERBB2;RPTOR;EGFR;MTOR;MED1;KDR;STAT3;BAD;SIRT6	JUN;EGFR;MTOR;STAT5A	KDR;CTNNB1;MYC;FGFR1;BAD;JUN;STAT3;MTOR;RPTOR;YAP1;STAT5A;EGFR;NOTCH1;ITGA4	ERBB2;RPTOR	STAT5A;KDR;ITGA4;BAD;MYC;STAT3;JUN;FGFR1	MTOR;BAD;SIRT6;CLDN1;ERBB2;ITGA4;STAT5A;KDR;MYC;FGFR1;NOTCH1;JUN;STAT3;CTNNB1		BAD;KDR;FGFR1;STAT5A;JUN	BAD;FGFR1;JUN;TWIST1;AR;CLDN1;CTNNB1;STAT5A;KDR;MED1;RPTOR;SIRT6;ERBB2;MTOR;NOTCH1	ERBB2;CTNNB1;NOTCH1;MTOR;ITGA4;SIRT6;JUN;BAD;MED1;STAT5A;MYC;RPTOR;FGFR1;EGFR	RPTOR;FGFR1;KDR;STAT5A;BAD;MYC;STAT3;ITGA4;JUN	CTNNB1;RPTOR;TWIST1;AR;ERBB2;NOTCH1;CLDN1;BAD;SIRT6;MED1;MTOR	MTOR;NOTCH1;CTNNB1;EGFR;YAP1		7		8	3	5	6
GO_POSITIVE_REGULATION_OF_CELL_DIFFERENTIATION	8.776	8.661	3.817	4.454	9.24	6.92	8.296	5.031	15.407	11.549	15.851		8.153	18.068	14.006	11.61	11.221	4.498	2.904	RB1;FGFR1;ANXA1;FOS;JUN;KDM1A;STAT1;BAD;RELA;AURKA;MED1;DNMT3B;PTGS2		BAD;KIT;FOS;NCOA1;SOCS1;GATA3;DNMT3B;STAT3;MTOR;SMAD2;ANXA1;JUN;RELA	FOS;RELA;BAD	SMAD2;GATA3;BAD;NCOA1;STAT3;KIT	NCOA1;SMAD2;RET;PRKDC;PTEN;MTOR;CTNNB1;NOTCH1;MAP2K1	SMAD2;MED1;STAT3;DNMT3B;NCOA1;NCOA3;PIAS1;RB1;MTOR;KDR;KIT;RELA;ILK;EZH2;BAD		ILK;BAD;PRKDC;RELA;MAP2K1;MTOR;NCOA1;RET;PTEN;CTNNB1;NOTCH1;SMAD2		KIT;PIAS1;NCOA1;MTOR;NCOA3;ILK;RB1;KDR;STAT3;RELA;BAD;MED1;SMAD2	JUN;SOCS1;ANXA1;MTOR;RELA;DNMT3B;FOS	RELA;MAP2K1;PRKDC;KDM1A;AURKA;STAT1;NOTCH1;ZEB1;RB1;KDR;JUN;KIT;STAT3;RET;NCOA3;DNMT3B;CTNNB1;FGFR1;NCOA1;BAD;MTOR;FOS;ANXA1;PTGS2;PIAS1	FOS;RELA	PTGS2;KDM1A;KDR;FOS;ANXA1;RELA;BAD;STAT3;STAT1;AURKA;JUN;ALK;KIT;NCOA3;FGFR1;RB1;DNMT3B	AURKA;NCOA3;RET;STAT1;PTEN;CTNNB1;NCOA1;MTOR;PRKDC;FGFR1;ALK;JUN;STAT3;KDR;FOS;NOTCH1;PTGS2;SMAD2;BAD;RB1;DNMT3B;MAP2K1;ANXA1;RELA;KIT;KDM1A		STAT1;ANXA1;BAD;RB1;KIT;FOS;DNMT3B;RET;AURKA;KDR;PTGS2;FGFR1;JUN	EP300;RB1;KDR;ZEB1;AR;MAP2K1;HDAC1;MED1;GATA3;DNMT3B;PTGS2;TNFSF11;KIT;PRKDC;AURKA;MTOR;BAD;TWIST1;JUN;NCOA1;ANXA1;FOS;CTNNB1;SMAD2;STAT1;RET;FGFR1;NOTCH1	DNMT3B;NCOA1;CTNNB1;ILK;FGFR1;PRKDC;ANXA1;KDM1A;MTOR;FOS;MED1;NOTCH1;RELA;MAP2K1;AURKA;RET;PTGS2;SMAD2;STAT1;JUN;BAD;PTEN;RB1	PIAS1;NCOA3;FOS;STAT1;DNMT3B;FGFR1;KDM1A;KDR;BAD;RB1;PTGS2;RELA;ANXA1;STAT3;AURKA;RET;KIT;JUN	CTNNB1;EP300;MAP2K1;PRKDC;ZEB1;TWIST1;HDAC1;AR;RET;TNFSF11;SMAD2;NOTCH1;GATA3;BAD;MED1;NCOA1;MTOR	MTOR;NOTCH1;NCOA1;MAP2K1;RET;PRKDC;CTNNB1;ZEB1	MED1;EZH2;DNMT3B;SMAD2	13		13	3	6	9
GO_AGING	7.36	8.661	2.664	9.493	6.519	9.419	5.906	6.409	14.136	9.047	17.759		8.251	12.599	15.956	11.077	5.387	4.168		BRCA2;TP53;FOS;JUN;ATG7;PDGFRB;RELA;PTGS2		CDKN1A;FOS;ATM;STAT3;MTOR;TP53;JUN;CHEK1;RELA	CHEK1;RELA;ATR;FOS;TP53	ATM;CHEK1;STAT3	CLDN1;ATR;CHEK2;PTEN;PRKDC;MTOR;BAK1;CDKN1A;MAP2K1;CHEK1	CHEK2;CHEK1;STAT3;ATM;MTOR;BAK1;RELA;ILK		CHEK2;ILK;PRKDC;RELA;MAP2K1;MTOR;ATM;CDKN1A;PTEN;CHEK1		CHEK1;CHEK2;MTOR;ILK;STAT3;RELA;ATM	JUN;MTOR;CDKN1A;RELA;TP53;FOS	PRKDC;JUN;RELA;BRCA2;STAT3;PDGFRB;MAP2K1;MTOR;CHEK1;CHEK2;ATR;FOS;CDKN1A;PTGS2;TP53;ATG7	FOS;CHEK1;TP53;RELA;ATR	PTGS2;PDGFRB;TP53;FOS;BRCA2;RELA;ATG7;STAT3;JUN;CHEK2	ATR;CHEK2;CLDN1;PDGFRB;BRCA2;CHEK1;TP53;PTEN;MTOR;PRKDC;JUN;STAT3;FOS;ATG7;PTGS2;BAK1;MAP2K1;CDKN1A;RELA		CHEK1;ATG7;TP53;FOS;BRCA2;CHEK2;PTGS2;PDGFRB;JUN	PTGS2;TWIST1;JUN;ATG7;CDKN1A;MAP2K1;CHEK1;PRKDC;FOS;CLDN1;PDGFRB;TP53;CHEK2;BRCA2;MTOR	CDKN1A;ATM;ILK;MTOR;PDGFRB;FOS;RELA;MAP2K1;JUN;CHEK2;TP53;BRCA2;ATG7;PTEN;CHEK1;PRKDC;PTGS2	ATG7;PDGFRB;FOS;TP53;BRCA2;CHEK2;PTGS2;CHEK1;RELA;ATR;STAT3;JUN	MAP2K1;PRKDC;TWIST1;CDKN1A;CLDN1;CHEK2;MTOR	MTOR;CHEK2;MAP2K1;PRKDC;CDKN1A		8		9	5	3	10
GO_COVALENT_CHROMATIN_MODIFICATION	7.383	8.56	6.608	9.26	11.113	9.168	9.531	2.401	19.102	8.784	18.541		6.981	19.93	17.081	11.712	12.267	6.719	1.799	EHMT2;BRCA2;TP53;PHF2;KDM1A;AURKA;MAPK8;DNMT3B;KAT2B		HDAC3;NCOA1;PRKAA1;DNMT1;GATA3;ATM;DNMT3B;TP53;CHEK1;PHF8	CHEK1;TP53	GATA3;ATM;CHEK1;NCOA1;PHF8;DNMT1;HDAC3	NCOA1;CREBBP;PRKAA1;KDM4B;ASH2L;CTNNB1;KDM4A;HDAC4;KDM5C;SIRT6;CHEK1	CHEK1;NCOA3;PHF8;DNMT3B;NCOA1;ATM;CREBBP;MAPK8;DNMT1;HDAC4;SIRT6;EZH2;HDAC3		HDAC4;KDM5C;SIRT6;CREBBP;KDM4A;ATM;KDM4B;NCOA1;CHEK1;CTNNB1;PRKAA1		CHEK1;CREBBP;MAPK8;NCOA3;DNMT1;HDAC3;PHF8;HDAC4;NCOA1;SIRT6;ATM	PRKAA1;TP53;DNMT3B	HDAC4;CHEK1;KAT2B;TP53;EHMT2;KDM4A;KDM4B;KDM1A;CREBBP;AURKA;KDM5A;BRCA2;MAPK8;DNMT1;NCOA3;DNMT3B;HDAC3;CTNNB1;SETD1A;NCOA1;PHF2;ASH2L	TP53;CHEK1	KDM1A;EHMT2;TP53;BRCA2;PHF2;HDAC3;MAPK8;KAT2B;AURKA;NCOA3;DNMT3B	AURKA;BRCA2;NCOA3;CHEK1;HDAC4;TP53;HDAC3;PRKAA1;KDM4A;CTNNB1;NCOA1;EHMT2;SIRT6;CREBBP;ASH2L;KDM5C;KDM4B;KAT2B;MAPK8;PHF2;DNMT3B;KDM1A		CHEK1;KAT2B;TP53;DNMT1;DNMT3B;BRCA2;AURKA;MAPK8;PHF2	EP300;CHEK1;HDAC4;TP53;PRKAA1;DNMT1;CREBBP;KAT2B;ASH2L;HDAC1;KDM5A;GATA3;DNMT3B;AURKA;PHF2;KDM4B;TWIST1;NCOA1;CTNNB1;MAPK8;BRCA2;SIRT6;KDM4A	DNMT3B;ATM;NCOA1;CTNNB1;PHF2;PRKAA1;HDAC4;SIRT6;KDM4A;EHMT2;KDM1A;KAT2B;CREBBP;MAPK8;AURKA;KDM4B;BRCA2;CHEK1;KDM5C;TP53	NCOA3;DNMT3B;MAPK8;KDM1A;PHF2;KAT2B;TP53;BRCA2;CHEK1;HDAC3;SETD1A;DNMT1;AURKA;EHMT2	ASH2L;CTNNB1;EP300;TWIST1;HDAC1;KDM5A;KDM4B;CREBBP;KDM4A;PRKAA1;GATA3;SIRT6;HDAC4;NCOA1	KDM4A;ASH2L;NCOA1;KDM5A;HDAC4;KDM4B;CREBBP;CTNNB1	EZH2;DNMT3B	9		10	2	7	11
GO_CELLULAR_RESPONSE_TO_PEPTIDE_HORMONE_STIMULUS	7.247	8.506	2.621	6.829	7.569	8.003	8.267	6.33	9.018	8.901	14.777		8.124	11.141	14.341	7.166	5.279	4.103		SMARCC1;PIK3CA;EIF4EBP1;STAT1;STAT5A;SRC;RELA;KAT2B		STAT6;RPS6KB1;CAV1;SOCS1;PRKAA1;STAT3;IGF1R;STAT5A;RELA	CAV1;RELA	CAV1;RPS6KB1;STAT3	SHC1;PRKAA1;TSC2;PRKDC;PTEN;RPS6KB1;FOXO1;STAT6	TSC2;EIF4EBP1;STAT3;PIK3CA;RELA;RPS6KB1;STAT6;CAV1;FOXO1		FOXO1;RELA;STAT6;PRKDC;CAV1;RPS6KB1;PTEN;TSC2;PRKAA1		RPS6KB1;FOXO1;STAT6;CAV1;TSC2;PIK3CA;EIF4EBP1;STAT3;RELA	SOCS1;STAT5A;RELA;PRKAA1;STAT6;IGF1R	PRKDC;FOXO1;SMARCC1;TSC2;RELA;STAT3;KAT2B;PIK3CA;STAT5A;STAT1;RPS6KB1;STAT6	CAV1;RELA	STAT5A;SMARCC1;RPS6KB1;PIK3CA;RELA;KAT2B;EIF4EBP1;STAT3;SRC;STAT1	PRKDC;STAT6;STAT3;FOXO1;STAT5A;KAT2B;STAT1;SHC1;TSC2;PRKAA1;PIK3CA;RELA;RPS6KB1;EIF4EBP1;SMARCC1;PTEN;SRC		STAT1;EIF4EBP1;PIK3CA;STAT6;SMARCC1;SRC;RPS6KB1;KAT2B;STAT5A	RPS6KB1;KAT2B;SMARCC1;SRC;TSC2;PIK3CA;FOXO1;CAV1;PRKDC;STAT6;STAT5A;STAT1;EIF4EBP1;PRKAA1	FOXO1;STAT6;STAT1;PRKAA1;RELA;SRC;EIF4EBP1;CAV1;KAT2B;TSC2;STAT5A;SMARCC1;RPS6KB1;PTEN;PRKDC;PIK3CA	PIK3CA;STAT6;STAT1;SMARCC1;STAT5A;KAT2B;RPS6KB1;RELA;STAT3	PRKDC;TSC2;RPS6KB1;CAV1;FOXO1;PRKAA1;STAT6	FOXO1;STAT6;PRKDC;RPS6KB1;TSC2		8		9	2	3	8
GO_RESPONSE_TO_WOUNDING	4.358	8.409	5.773	8.99	9.411	8.881	6.999	3.885	8.685	5.461	14.472		4.932	16.866	13.279	4.195	11.623	4.731	3.368	PIK3CA;ANXA1;JUN;KDM1A;PDGFRB;AURKA;SRC		EGFR;PDGFRA;ERBB2;CAV1;GATA3;MTOR;SMAD2;ANXA1;ERBB3;JUN;ITGB1	CAV1;ERBB2	EGFR;PDGFRA;SMAD2;GATA3;ERBB3;ERBB2;CAV1	CLDN1;BAX;PDGFRA;SMAD2;ITGB4;ERBB2;ITGA5;PTEN;MTOR;ITGB1;KLF4;MAP2K1	SMAD2;KLF4;PIK3CA;MTOR;KDR;CASP3;EGFR;ILK;ITGB1;ERBB2;YWHAZ;ERBB3;CAV1		ILK;ITGB1;BAX;ITGA5;ERBB2;MAP2K1;CAV1;MTOR;EGFR;PTEN;KLF4;SMAD2		CASP3;ERBB3;ERBB2;CAV1;EGFR;MTOR;PIK3CA;ILK;KDR;SMAD2	JUN;ANXA1;MTOR;EGFR;ITGB1	KLF4;KDR;PDGFRA;JUN;ITGA5;PDGFRB;KDM1A;MAP2K1;CASP3;MTOR;PIK3CA;AURKA;EGFR;ITGB1;ANXA1	ERBB2;CAV1	KDM1A;PDGFRB;KDR;ANXA1;CASP3;PIK3CA;SRC;AURKA;JUN	AURKA;CLDN1;PDGFRB;ITGB1;PDGFRA;PTEN;BAX;CASP3;MTOR;SRC;ERBB2;ITGA5;JUN;KDR;PIK3CA;SMAD2;KLF4;MAP2K1;ITGB4;ANXA1;KDM1A		ANXA1;PIK3CA;SRC;AURKA;KDR;PDGFRB;CASP3;JUN	BAX;PDGFRB;KDR;ITGB4;SRC;PIK3CA;MAP2K1;CAV1;HDAC1;CLDN1;ITGA5;GATA3;CASP3;AURKA;MTOR;ERBB3;JUN;ANXA1;SMAD2;ITGB1;KLF4;PDGFRA;ERBB2	ERBB2;ILK;PDGFRB;ITGB1;ANXA1;ITGA5;KDM1A;MTOR;CAV1;PIK3CA;SRC;MAP2K1;AURKA;EGFR;SMAD2;BAX;JUN;KLF4;PTEN	PIK3CA;PDGFRB;KDM1A;KDR;CASP3;ANXA1;AURKA;JUN	PDGFRA;MAP2K1;ITGB4;ERBB3;HDAC1;ITGB1;CAV1;ERBB2;SMAD2;BAX;GATA3;CLDN1;MTOR;ITGA5;KLF4	MTOR;PDGFRA;ITGB1;MAP2K1;EGFR;KLF4;ITGA5	KLF4;SMAD2;ITGB1;YWHAZ	7		11	2	7	12
GO_REGULATION_OF_AUTOPHAGY	5.895	8.335	4.714	4.487	12.591	7.847	12.162	3.768	14.839	8.729	13.21		7.962	14.557	12.74	10.686	7.37	4.02	1.988	FOXK2;PIK3CA;TP53;ATG7;BAD;ULK1;MAPK8		BAD;MET;PRKAA1;ATM;RPTOR;STAT3;MTOR;TP53;PRKAB1	RPTOR;BAD;TP53	ATM;MET;BAD;RPTOR;STAT3	MET;PRKAA1;TSC2;MTOR;FOXO1;KDM4A	TSC2;STAT3;FOXO1;PIK3CA;ATM;MTOR;KDR;MAPK8;CASP3;RPTOR;MET;PRKAB1;BAD		FOXO1;BAD;RPTOR;MTOR;KDM4A;ATM;TSC2;MET;PRKAA1		CASP3;FOXO1;RPTOR;MET;TSC2;MAPK8;MTOR;PIK3CA;KDR;STAT3;BAD;ATM	MTOR;PRKAA1;TP53;PRKAB1	KDM4A;FOXO1;KDR;BAD;MET;ULK1;TSC2;STAT3;HK2;CASP3;RPTOR;MTOR;PIK3CA;MAPK8;FOXK2;TP53;ATG7	TP53;RPTOR	TP53;KDR;FOXK2;CASP3;PIK3CA;MAPK8;BAD;ATG7;ULK1;STAT3	MTOR;BAD;ATG7;FOXK2;MET;FOXO1;ULK1;KDR;TP53;TSC2;KDM4A;PIK3CA;PRKAA1;STAT3;MAPK8;CASP3		ATG7;PIK3CA;BAD;FOXK2;TP53;ULK1;KDR;MAPK8;CASP3	BAD;EP300;ATG7;TSC2;PIK3CA;FOXO1;CASP3;ULK1;MAPK8;TP53;KDR;RPTOR;KDM4A;MET;PRKAA1;MTOR;FOXK2	FOXK2;ATM;MET;FOXO1;ULK1;MAPK8;MTOR;PRKAA1;BAD;KDM4A;TSC2;RPTOR;ATG7;TP53;PIK3CA	ATG7;PIK3CA;HK2;RPTOR;ULK1;MAPK8;KDR;BAD;TP53;CASP3;STAT3;FOXK2	EP300;RPTOR;TSC2;KDM4A;FOXO1;PRKAA1;MET;BAD;MTOR	KDM4A;MTOR;FOXO1;TSC2;MET	PRKAB1;TSC2	7		9	3	5	6
GO_RESPONSE_TO_STEROID_HORMONE	9.676	8.292	3.594	5.516	8.576	9.049	8.062	6.221	13.491	7.482	13.134		6.702	18.392	16.587	5.87	12.4	7.55	1.981	EIF4EBP1;SMARCA4;ANXA1;FOS;BAD;RELA;MED1;SRC;DNMT3B;PTGS2		BAD;EGFR;CDKN1A;CAV1;FOS;NCOA1;DNMT3B;ANXA1;RELA	CAV1;FOS;RELA;BAD	EGFR;BAD;CAV1;NCOA1	NCOA1;ESR1;CLDN1;IDH1;FOXO1;CDKN1A;NOTCH1	MED1;EIF4EBP1;DNMT3B;NCOA1;FOXO1;CASP3;EGFR;RELA;CAV1;BAD		FOXO1;BAD;RELA;EGFR;PGR;CDKN1A;NCOA1;IDH1;NOTCH1;CAV1		CASP3;FOXO1;BAD;CAV1;EGFR;EIF4EBP1;RELA;NCOA1;MED1	ANXA1;CDKN1A;RELA;DNMT3B;EGFR;FOS	FOXO1;NCOA1;BAD;CBX3;RELA;FOS;CASP3;YAP1;ESR1;CDKN1A;EGFR;SMARCA4;ANXA1;PTGS2;DNMT3B;NOTCH1	FOS;CAV1;RELA	PTGS2;FOS;ANXA1;CASP3;RELA;BAD;EIF4EBP1;SRC;DNMT3B	NCOA1;BAD;DNMT3B;CLDN1;FOXO1;IDH1;CDKN1A;PTGS2;EIF4EBP1;ANXA1;NOTCH1;ESR1;RELA;FOS;CASP3;SRC		ANXA1;EIF4EBP1;BAD;SRC;FOS;DNMT3B;PTGS2;CASP3	EP300;ESR1;AR;SRC;FOXO1;CAV1;HDAC1;CLDN1;MED1;DNMT3B;PTGS2;CASP3;EIF4EBP1;BAD;CDKN1A;NCOA1;ANXA1;FOS;IDH1;NOTCH1	CDKN1A;DNMT3B;ANXA1;NCOA1;FOXO1;IDH1;SMARCA4;CAV1;FOS;RELA;SRC;EIF4EBP1;MED1;BAD;EGFR;PGR;PTGS2;NOTCH1	FOS;DNMT3B;BAD;PTGS2;CASP3;RELA;ANXA1;CBX3	ESR1;EP300;HDAC1;AR;FOXO1;CAV1;CDKN1A;NOTCH1;CLDN1;BAD;MED1;NCOA1;IDH1	NOTCH1;ESR1;NCOA1;FOXO1;SMARCA4;CDKN1A;EGFR;YAP1	MED1;DNMT3B	10		9	4	4	7
GO_TUBE_DEVELOPMENT	7.383	8.284	6.59	16.573	15.255	16.421	12.226	3.046	21.132	9.999	27.259		9.796	29.941	24.335	9.121	20.108	12.75	5.389	PIK3CA;RB1;FGFR1;ANXA1;JUN;PDGFRB;STAT1;MED1;SRC;EIF4EBP1;PTGS2;MYC		EGFR;PDGFRA;ERBB2;KIT;CAV1;CDKN1A;MET;GATA3;STAT3;SMAD2;ANXA1;JUN;ITGB1		EGFR;PDGFRA;SMAD2;GATA3;MET;STAT3;ERBB2;KIT;CAV1	BAX;MET;TSC2;ERBB2;BAK1;ITGB1;SIRT6;PDGFRA;SMAD2;PTEN;LRP6;ESR1;RET;ITGA5;NOTCH1;SHC1;JAK1;CTNNB1;CDKN1A;KLF4;MAP2K1	TSC2;SMAD2;EIF4EBP1;EGFR;MET;SIRT6;MED1;PIK3CA;LRP6;KDR;ITGB1;YWHAZ;BAK1;KIT;ERBB2;ILK;KLF4;STAT3;CASP3;RB1;CAV1		ITGA5;SIRT6;EGFR;TSC2;PGR;ITGB1;CAV1;RET;PTEN;NOTCH1;JAK1;ILK;ERBB2;KLF4;MET;LRP6;SMAD2;BAX;MAP2K1;CDKN1A;CTNNB1		CASP3;ERBB2;CAV1;MET;TSC2;EGFR;PIK3CA;ILK;EIF4EBP1;RB1;KDR;STAT3;MED1;KIT;SIRT6;LRP6;SMAD2	JUN;ANXA1;CDKN1A;EGFR;ITGB1	PDGFRB;MAP2K1;LRP6;ITGA5;YAP1;STAT1;EGFR;NOTCH1;ZEB1;RB1;PHGDH;KLF4;KDR;MYC;JUN;KIT;STAT3;CASP3;PIK3CA;RET;ESR1;ITGB1;CTNNB1;PDGFRA;FGFR1;MET;TSC2;HK2;CDKN1A;ANXA1;PTGS2	ERBB2;CAV1	PTGS2;PDGFRB;KDR;ANXA1;CASP3;PIK3CA;EIF4EBP1;PHGDH;MYC;STAT3;SRC;JUN;KIT;FGFR1;STAT1;RB1	PDGFRB;ITGB1;RET;JAK1;STAT1;PDGFRA;PTEN;CTNNB1;CASP3;BAX;SIRT6;ERBB2;MYC;FGFR1;ITGA5;TSC2;EIF4EBP1;JUN;KDR;STAT3;LRP6;PHGDH;NOTCH1;PTGS2;SHC1;BAK1;PIK3CA;SMAD2;ESR1;RB1;KLF4;MAP2K1;MET;CDKN1A;ANXA1;KIT;SRC		STAT1;ANXA1;EIF4EBP1;PIK3CA;SRC;KIT;RB1;CASP3;PHGDH;RET;KDR;PTGS2;PDGFRB;FGFR1;JUN	FGFR1;BAX;EP300;PHGDH;LRP6;RB1;PDGFRB;KDR;ZEB1;ESR1;AR;SRC;TSC2;PIK3CA;MAP2K1;CAV1;ITGA5;MED1;GATA3;MET;PTGS2;KIT;CASP3;JAK1;EIF4EBP1;TWIST1;JUN;CDKN1A;ANXA1;CTNNB1;SMAD2;KLF4;ITGB1;STAT1;RET;SIRT6;PDGFRA;ERBB2;NOTCH1	ERBB2;CTNNB1;ILK;PDGFRB;EIF4EBP1;SIRT6;TSC2;JAK1;ITGB1;MYC;FGFR1;CDKN1A;ANXA1;MET;ITGA5;CAV1;MED1;PIK3CA;PGR;NOTCH1;LRP6;SRC;MAP2K1;RET;PTGS2;EGFR;SMAD2;STAT1;BAX;JUN;KLF4;PTEN;RB1	PIK3CA;HK2;PDGFRB;STAT1;FGFR1;KDR;MYC;RB1;PTGS2;PHGDH;CASP3;ANXA1;STAT3;RET;KIT;JUN	ESR1;MAP2K1;SMAD2;ITGA5;CTNNB1;JAK1;TSC2;CDKN1A;NOTCH1;GATA3;MET;BAX;MED1;EP300;PDGFRA;LRP6;TWIST1;ITGB1;RET;SIRT6;KLF4;ZEB1;AR;CAV1;ERBB2	NOTCH1;ESR1;PDGFRA;ITGB1;MAP2K1;EGFR;RET;KLF4;LRP6;CTNNB1;CDKN1A;TSC2;MET;ITGA5;YAP1;ZEB1	ITGB1;SMAD2;MED1;TSC2;KLF4;BAK1;YWHAZ	12		13		9	21
GO_RESPONSE_TO_HYDROGEN_PEROXIDE	9.83	8.262	2.243	7.922	10.601	9.384	6.573	6.519	14.66	10.629	19.115		11.08	16.024	16.641	10.181	7.527	5.652	3.779	ANXA1;JUN;PDGFRB;BAD;STAT1;LDHA;SRC;RELA		BAD;MET;PRKAA1;ANXA1;JUN;STAT6;RELA	RELA;BAD	MET;BAD	MET;PRKAA1;MAP1LC3A;FOXO1;BAK1;KLF4;STAT6	KLF4;FOXO1;BAK1;CASP3;RELA;MET;STAT6;EZH2;BAD		FOXO1;MAP1LC3A;BAD;RELA;STAT6;KLF4;MET;PRKAA1		CASP3;FOXO1;STAT6;MET;RELA;BAD	JUN;ANXA1;RELA;PRKAA1;STAT6	KLF4;FOXO1;BAD;JUN;RELA;MAP1LC3A;MET;PDGFRB;CASP3;STAT1;ANXA1;STAT6;LDHA		PDGFRB;ANXA1;LDHA;CASP3;RELA;BAD;SRC;JUN;STAT1	BAD;MAP1LC3A;STAT6;PDGFRB;KLF4;MET;FOXO1;STAT1;BAK1;ANXA1;PRKAA1;JUN;RELA;LDHA;CASP3;SRC		LDHA;STAT1;ANXA1;BAD;STAT6;SRC;PDGFRB;CASP3;JUN	BAD;MAP1LC3A;JUN;SRC;CASP3;FOXO1;ANXA1;STAT6;PDGFRB;STAT1;KLF4;LDHA;MET;PRKAA1	ANXA1;MET;FOXO1;STAT6;PDGFRB;PRKAA1;SRC;RELA;JUN;STAT1;BAD;MAP1LC3A;KLF4;LDHA	STAT6;PDGFRB;STAT1;LDHA;BAD;CASP3;RELA;ANXA1;JUN	MAP1LC3A;FOXO1;PRKAA1;MET;BAD;STAT6;KLF4	FOXO1;STAT6;KLF4;MAP1LC3A;MET	EZH2;KLF4;BAK1	8		7	2	2	7
GO_RESPONSE_TO_X_RAY	4.459	8.236	3.257		2.665	2.757	2.81	5.161	6.833	5.893	6.733		6.079	8.519	6.965	5.668	2.687			TP53;ANXA1;BRCA2		CDKN1A;ATM;GATA3;ANXA1;TP53		ATM;GATA3		ATM;CASP3		ATM;CDKN1A		CASP3;ATM	CDKN1A;TP53;ANXA1	BRCA2;CASP3;CDKN1A;ANXA1;TP53		CASP3;TP53;BRCA2;ANXA1	BRCA2;TP53;CDKN1A;ANXA1;CASP3		TP53;CASP3;BRCA2;ANXA1	CASP3;CDKN1A;ANXA1;TP53;BRCA2;GATA3	CDKN1A;ANXA1;ATM;BRCA2;TP53	BRCA2;CASP3;TP53;ANXA1	CDKN1A;GATA3			3		5		2
GO_NEGATIVE_REGULATION_OF_BIOSYNTHETIC_PROCESS	11.368	8.196	3.646	10.253	13.065	9.108	11.695	4.797	22.367	11.407	21.438		7.63	23.65	20.179	13.104	17.407	10.336	3.082	FOXK2;EHMT2;BRCA2;RB1;EIF4EBP1;TP53;SMARCA4;FGFR1;JUN;PHF2;ATG7;KDM1A;STAT1;RELA;MED1;SRC;DNMT3B;MYC		HDAC3;CDKN1A;CAV1;DNMT1;PRKAA1;GATA3;DNMT3B;STAT3;SMAD2;TP53;PHF8;JUN;SQSTM1;STAT6;RELA	RELA;ATR;CAV1;SQSTM1;TP53	SMAD2;GATA3;PHF8;STAT3;DNMT1;CAV1;HDAC3	ESR1;SIRT6;CREBBP;SHC1;SMAD2;PRKAA1;ATR;CHEK2;CDKN1B;FOXO1;CTNNB1;HDAC4;KLF4;NOTCH1;CDKN1A;KDM4A;KDM5C;STAT6	SMAD2;EIF4EBP1;DNMT3B;CTBP2;DNMT1;HDAC4;SIRT6;FOXO1;PHF8;MED1;CREBBP;RELA;CHEK2;PIAS1;STAT6;EZH2;KLF4;STAT3;CDKN1B;RB1;CAV1;HDAC3		CHEK2;FOXO1;HDAC4;KDM5C;SIRT6;RELA;STAT6;CAV1;CDKN1B;CREBBP;KDM4A;SMAD2;CDKN1A;CTNNB1;KLF4;NOTCH1;PRKAA1		CDKN1B;CTBP2;STAT3;RELA;MED1;CREBBP;CHEK2;HDAC3;RB1;PHF8;STAT6;PIAS1;CAV1;DNMT1;FOXO1;EIF4EBP1;HDAC4;SIRT6;SMAD2	JUN;CDKN1A;RELA;PRKAA1;TP53;DNMT3B;STAT6;SQSTM1	HDAC4;RELA;TP53;EHMT2;ATG7;KDM4A;FOXO1;KDM1A;CHEK2;YAP1;CREBBP;STAT1;SMARCA4;NOTCH1;STAT6;ZEB1;RB1;KLF4;MYC;JUN;KDM5A;BRCA2;STAT3;ESR1;SQSTM1;DNMT1;DNMT3B;HDAC3;CTNNB1;FGFR1;PHF2;CBX3;ATR;CDKN1B;CDKN1A;FOXK2;PIAS1	TP53;CAV1;RELA;ATR;SQSTM1	KDM1A;TP53;PHF2;HDAC3;STAT3;SRC;CHEK2;SMARCE1;FGFR1;STAT1;DNMT3B;EHMT2;BRCA2;RELA;ATG7;EIF4EBP1;JUN;FOXK2;RB1;MYC	ATR;CHEK2;BRCA2;HDAC4;KDM1A;TP53;CDKN1B;STAT1;PRKAA1;HDAC3;KDM4A;CTNNB1;EHMT2;SIRT6;FOXK2;MYC;CREBBP;FGFR1;EIF4EBP1;SMARCE1;JUN;STAT3;ATG7;STAT6;KDM5C;NOTCH1;SHC1;SMAD2;ESR1;PHF2;RB1;DNMT3B;KLF4;FOXO1;CDKN1A;RELA;SRC		STAT1;EIF4EBP1;ATG7;STAT6;FOXK2;TP53;SRC;RB1;DNMT1;DNMT3B;BRCA2;CHEK2;FGFR1;PHF2;JUN	FGFR1;EP300;HDAC4;RB1;STAT6;TP53;CHEK2;ZEB1;PRKAA1;FOXK2;DNMT1;ESR1;CDKN1B;CREBBP;AR;SRC;SQSTM1;FOXO1;CAV1;HDAC1;KDM5A;MED1;GATA3;DNMT3B;EIF4EBP1;PHF2;SMARCC2;ATG7;TWIST1;JUN;CDKN1A;CTNNB1;SMAD2;KLF4;STAT1;BRCA2;SIRT6;KDM4A;NOTCH1	DNMT3B;CTNNB1;PHF2;FOXO1;SMARCA4;PRKAA1;HDAC4;EIF4EBP1;SIRT6;KDM4A;ATG7;MYC;FGFR1;CDKN1A;EHMT2;KDM1A;CAV1;MED1;CREBBP;NOTCH1;STAT6;RELA;SRC;BRCA2;FOXK2;KDM5C;SMAD2;STAT1;CHEK2;JUN;KLF4;CDKN1B;TP53;RB1	ATG7;PIAS1;DNMT3B;RB1;RELA;DNMT1;SQSTM1;FOXK2;STAT1;CHEK2;ATR;STAT3;JUN;STAT6;PHF2;KDM1A;BRCA2;CBX3;FGFR1;TP53;MYC;HDAC3;EHMT2	ESR1;SMARCC2;SMAD2;SQSTM1;CTNNB1;KDM5A;CDKN1A;NOTCH1;GATA3;HDAC4;MED1;EP300;TWIST1;FOXO1;PRKAA1;SIRT6;CHEK2;KLF4;ZEB1;HDAC1;AR;CAV1;CREBBP;KDM4A;STAT6;CDKN1B	KDM4A;NOTCH1;ESR1;CHEK2;FOXO1;KDM5A;HDAC4;STAT6;SMARCA4;CREBBP;KLF4;CDKN1B;CTNNB1;CDKN1A;YAP1;ZEB1	SMAD2;MED1;EZH2;DNMT3B;KLF4	18		15	5	7	18
GO_RESPONSE_TO_ALCOHOL	2.358	8.166	5.363	9.131	6.093	7.736	4.204	3.046	4.84	2.981	11.51		2.228	9.09	8.342	1.919	8.631	3.533	3.33	BAD;EIF4EBP1;FOS		BAD;CDKN1A;FOS;PRKAA1;GATA3;STAT3;SMAD2;BCL2L1	FOS;BAD	SMAD2;GATA3;BAD;STAT3;BCL2L1	CLDN1;SMAD2;PRKAA1;PTEN;BAK1;CTNNB1;CDKN1A;KLF4;LRP6	SMAD2;KLF4;EIF4EBP1;STAT3;LRP6;BAK1;BAD		BAD;PRKAA1;CDKN1A;PTEN;CTNNB1;KLF4;LRP6;SMAD2		EIF4EBP1;STAT3;BAD;LRP6;SMAD2	CDKN1A;PRKAA1;FOS	KLF4;CTNNB1;BAD;STAT3;FOS;LRP6;CDKN1A		BAD;EIF4EBP1;STAT3;FOS	BAD;CLDN1;KLF4;CDKN1A;CTNNB1;EIF4EBP1;BAK1;SMAD2;PRKAA1;STAT3;PTEN;FOS;LRP6		BAD;FOS;EIF4EBP1	BAD;CDKN1A;LRP6;EIF4EBP1;FOS;CLDN1;SMAD2;CTNNB1;KLF4;PRKAA1;GATA3	CDKN1A;CTNNB1;LRP6;SMAD2;PRKAA1;FOS;EIF4EBP1;BAD;KLF4;PTEN	FOS;STAT3;BAD	CTNNB1;LRP6;CDKN1A;PRKAA1;SMAD2;GATA3;CLDN1;BAD;KLF4	KLF4;CDKN1A;LRP6;CTNNB1	KLF4;BAK1;SMAD2	3		8	2	5	9
GO_HOMEOSTATIC_PROCESS	7.405	8.141	5.69	10.048	13.589	9.793	11.464	3.517	17.023	8.359	18.914		6.727	16.321	16.018	8.979	10.573	8.292	2.844	FOXK2;PDK1;PIK3CA;RB1;BRCA2;SMARCA4;ANXA1;KDM1A;PDGFRB;STAT1;BAD;MED1;SRC;PTGS2;MYC		BAD;STAT6;EGFR;PDGFRA;KIT;HDAC3;CAV1;MET;PRKAA1;GATA3;ATM;STAT3;ITGB1;ANXA1;PRKAB1;IGF1R	CAV1;ATR;BAD	EGFR;PDGFRA;GATA3;ATM;MET;BAD;STAT3;KIT;CAV1;HDAC3	BAX;MET;ATR;PRKDC;BAK1;ITGB1;SIRT6;CLDN1;PDGFRA;PRKAA1;MAP2K6;LRP6;ESR1;CREBBP;GLS;FOXO1;NOTCH1;STAT6;CTNNB1	PDK1;MAP2K6;EGFR;MET;SIRT6;FOXO1;MED1;PIK3CA;LRP6;CREBBP;KDR;ITGB1;BAK1;KIT;STAT6;EZH2;PRKAB1;STAT3;ATM;CASP3;RB1;CAV1;HDAC3;BAD		SIRT6;STAT6;EGFR;CREBBP;ITGB1;CAV1;PRKAA1;MAP2K6;NOTCH1;GLS;FOXO1;BAD;PRKDC;PDK1;MET;LRP6;BAX;ATM;CTNNB1		STAT3;KIT;BAD;MED1;CREBBP;LRP6;CASP3;PDK1;HDAC3;RB1;STAT6;CAV1;MET;KDR;ATM;FOXO1;MAP2K6;EGFR;PIK3CA;SIRT6	ANXA1;PRKAB1;PRKAA1;STAT6;EGFR;IGF1R;ITGB1	PDGFRB;LRP6;PRKDC;FOXO1;PDK1;KDM1A;YAP1;CREBBP;STAT1;EGFR;SMARCA4;NOTCH1;STAT6;RB1;KDR;MYC;KIT;BRCA2;STAT3;CASP3;PIK3CA;ESR1;ITGB1;HDAC3;CTNNB1;PDGFRA;MAP2K6;BAD;MET;HK2;ATR;FOXK2;ANXA1;PTGS2		PTGS2;KDM1A;PDGFRB;KDR;BRCA2;ANXA1;FOXK2;CASP3;PIK3CA;PDK1;HDAC3;BAD;MYC;STAT3;SRC;STAT1;KIT;RB1	ATR;BRCA2;CLDN1;PDGFRB;ITGB1;KDM1A;STAT1;PRKAA1;HDAC3;PDGFRA;CTNNB1;CASP3;BAX;SIRT6;PRKDC;FOXK2;MAP2K6;MYC;CREBBP;KDR;STAT3;PDK1;LRP6;STAT6;GLS;NOTCH1;PTGS2;BAK1;PIK3CA;ESR1;BAD;RB1;MET;FOXO1;ANXA1;KIT;SRC		STAT1;ANXA1;PIK3CA;BAD;STAT6;FOXK2;SRC;KIT;RB1;PDK1;BRCA2;KDR;PTGS2;PDGFRB;CASP3	BAX;LRP6;RB1;STAT6;PDGFRB;KDR;PRKAA1;FOXK2;ESR1;CREBBP;SRC;PIK3CA;FOXO1;CAV1;CLDN1;MED1;GATA3;MET;PTGS2;PDK1;TNFSF11;KIT;CASP3;PRKDC;BAD;MAP2K6;ANXA1;CTNNB1;ITGB1;STAT1;BRCA2;SIRT6;PDGFRA;NOTCH1	ATM;CTNNB1;FOXO1;SMARCA4;PDGFRB;PRKAA1;SIRT6;PDK1;ITGB1;MYC;PRKDC;ANXA1;MET;KDM1A;CAV1;MED1;CREBBP;PIK3CA;NOTCH1;LRP6;GLS;STAT6;SRC;MAP2K6;BRCA2;PTGS2;EGFR;FOXK2;STAT1;BAX;BAD;RB1	PIK3CA;KDR;BAD;RB1;PTGS2;ANXA1;KIT;FOXK2;HK2;STAT1;ATR;STAT3;STAT6;PDGFRB;KDM1A;BRCA2;PDK1;MYC;HDAC3;CASP3	ESR1;CTNNB1;NOTCH1;MET;GATA3;BAX;MED1;PDGFRA;PRKDC;LRP6;ITGB1;FOXO1;TNFSF11;PRKAA1;CLDN1;BAD;SIRT6;MAP2K6;CAV1;CREBBP;STAT6	NOTCH1;ESR1;PDGFRA;FOXO1;STAT6;SMARCA4;ITGB1;CREBBP;EGFR;PRKDC;LRP6;CTNNB1;MET;MAP2K6;YAP1	ITGB1;MED1;EZH2;BAK1;PRKAB1	15		16	3	10	19
GO_WOUND_HEALING	3.08	8.054	6.253	5.464	9.263	6.404	7.785	3.19	6.044	4.254	9.538		3.678	11.721	9.213	3.131	8.065	3.33	2.673	PIK3CA;ANXA1;KDM1A;PDGFRB;SRC		EGFR;PDGFRA;ERBB2;CAV1;GATA3;MTOR;SMAD2;ANXA1;ERBB3;ITGB1	CAV1;ERBB2	EGFR;PDGFRA;SMAD2;GATA3;ERBB3;ERBB2;CAV1	CLDN1;PDGFRA;SMAD2;ERBB2;ITGA5;PTEN;MTOR;ITGB1	SMAD2;PIK3CA;MTOR;KDR;CASP3;EGFR;ILK;ITGB1;ERBB2;YWHAZ;ERBB3;CAV1		ILK;ITGA5;ERBB2;CAV1;MTOR;EGFR;PTEN;ITGB1;SMAD2		CASP3;ERBB3;ERBB2;CAV1;EGFR;MTOR;PIK3CA;ILK;KDR;SMAD2	MTOR;EGFR;ANXA1;ITGB1	KDR;PDGFRA;ITGA5;PDGFRB;KDM1A;CASP3;MTOR;PIK3CA;EGFR;ITGB1;ANXA1	ERBB2;CAV1	KDM1A;PDGFRB;KDR;ANXA1;CASP3;PIK3CA;SRC	MTOR;CLDN1;PDGFRB;ERBB2;ITGB1;KDR;KDM1A;ITGA5;ANXA1;PIK3CA;SMAD2;PDGFRA;PTEN;CASP3;SRC		ANXA1;PIK3CA;SRC;KDR;PDGFRB;CASP3	ERBB3;SRC;CASP3;PIK3CA;CAV1;ANXA1;HDAC1;SMAD2;PDGFRB;KDR;CLDN1;ITGA5;ITGB1;PDGFRA;ERBB2;GATA3;MTOR	ERBB2;ANXA1;ITGA5;ILK;KDM1A;SMAD2;MTOR;PDGFRB;CAV1;SRC;ITGB1;PTEN;PIK3CA;EGFR	PIK3CA;PDGFRB;KDM1A;KDR;CASP3;ANXA1	PDGFRA;ERBB3;HDAC1;ITGB1;CAV1;ERBB2;SMAD2;GATA3;CLDN1;MTOR;ITGA5	MTOR;PDGFRA;ITGB1;EGFR;ITGA5	ITGB1;SMAD2;YWHAZ	5		10	2	7	8
GO_PHOSPHATIDYLINOSITOL_3_KINASE_SIGNALING	3.949	8.043	7.86	4.971	10.327	4.927	9.398	2.263	8.517	6.022	11.036		6.319	14.025	8.782	4.511	7.312	4.16	2.523	PDGFRB;FGFR1;SRC;PIK3CA		EGFR;PDGFRA;ERBB2;KIT;GATA3;ERBB3;IGF1R		EGFR;PDGFRA;GATA3;ERBB3;ERBB2;KIT	PDGFRA;TSC2;ERBB2;PTEN;KLF4	TSC2;BECN1;KLF4;PIK3CA;KDR;EGFR;KIT;ERBB2;ERBB3		ERBB2;EGFR;PTEN;TSC2;KLF4		ERBB3;ERBB2;KIT;EGFR;TSC2;PIK3CA;KDR;BECN1	EGFR;IGF1R	KLF4;KDR;PDGFRA;FGFR1;KIT;TSC2;PDGFRB;PIK3CA;EGFR		PDGFRB;KDR;PIK3CA;SRC;KIT;FGFR1	PDGFRB;KLF4;ERBB2;FGFR1;TSC2;PIK3CA;KDR;PDGFRA;PTEN;KIT;SRC		PIK3CA;SRC;KIT;KDR;PDGFRB;FGFR1	ERBB3;FGFR1;TWIST1;KIT;SRC;TSC2;PIK3CA;PDGFRB;KDR;KLF4;PDGFRA;ERBB2;GATA3	ERBB2;FGFR1;PDGFRB;SRC;TSC2;KLF4;PTEN;PIK3CA;EGFR	PIK3CA;PDGFRB;FGFR1;KDR;KIT	PDGFRA;TWIST1;ERBB3;TSC2;ERBB2;GATA3;KLF4	KLF4;PDGFRA;TSC2;EGFR	KLF4;TSC2	4		7		6	5
GO_CD4_POSITIVE_ALPHA_BETA_T_CELL_DIFFERENTIATION		8.029	2.614	2.115	3.156	2.102	3.361	5.758	3.747	2.028	3.677		2.128	3.696	2.717	3.058	3.172	2.348				SOCS1;GATA3;STAT3;MTOR;ANXA1;STAT6		STAT3;GATA3	MTOR;STAT6	STAT6;STAT3;MTOR		STAT6;MTOR		STAT6;STAT3;MTOR	MTOR;STAT6;SOCS1;ANXA1	ANXA1;STAT6;STAT3;MTOR		STAT3;ANXA1	STAT3;MTOR;STAT6;ANXA1		STAT6;ANXA1	STAT6;GATA3;MTOR;ANXA1	STAT6;MTOR;ANXA1	STAT6;STAT3;ANXA1	STAT6;GATA3;MTOR	MTOR;STAT6				6		2	2
GO_CHROMATIN_ORGANIZATION	12.833	8.017	5.549	8.546	11.184	8.459	9.973	2.801	26.317	13.825	22.982		9.766	23.068	20.646	17.756	12.226	7.592	1.488	EHMT2;SMARCC1;BRCA2;RB1;TP53;SMARCA4;PHF2;KDM1A;RELA;AURKA;MAPK8;MKI67;DNMT3B;MYC;KAT2B		HDAC3;NCOA1;PRKAA1;DNMT1;GATA3;ATM;DNMT3B;PHF8;TP53;CHEK1;RELA	CHEK1;RELA;TP53	GATA3;ATM;CHEK1;NCOA1;PHF8;DNMT1;HDAC3	NCOA1;ESR1;CREBBP;PRKAA1;KDM4B;ASH2L;CTNNB1;KDM4A;HDAC4;KDM5C;SIRT6;CHEK1	CHEK1;NCOA3;PHF8;DNMT3B;NCOA1;ATM;RB1;CREBBP;MAPK8;DNMT1;RELA;HDAC4;SIRT6;EZH2;HDAC3		HDAC4;KDM5C;SIRT6;RELA;CREBBP;KDM4A;ATM;KDM4B;NCOA1;CHEK1;CTNNB1;PRKAA1		CHEK1;CREBBP;MAPK8;NCOA3;DNMT1;HDAC3;RB1;RELA;PHF8;HDAC4;NCOA1;SIRT6;ATM	RELA;PRKAA1;TP53;DNMT3B	HDAC4;SMARCC1;RELA;CHEK1;KAT2B;TP53;EHMT2;KDM4A;KDM4B;KDM1A;CREBBP;AURKA;SMARCA4;RB1;MYC;KDM5A;BRCA2;CHAF1A;ESR1;MAPK8;DNMT1;DNMT3B;NCOA3;HDAC3;CTNNB1;SETD1A;NCOA1;PHF2;CBX3;MKI67;ASH2L	TP53;CHEK1;RELA	SMARCC1;KDM1A;EHMT2;TP53;MKI67;PHF2;BRCA2;HDAC3;RELA;MAPK8;KAT2B;MYC;AURKA;SMARCE1;NCOA3;RB1;DNMT3B	AURKA;BRCA2;NCOA3;CHEK1;HDAC4;TP53;HDAC3;PRKAA1;KDM4A;CTNNB1;NCOA1;EHMT2;SIRT6;MYC;CREBBP;SMARCE1;ASH2L;KDM5C;KDM4B;KAT2B;MAPK8;ESR1;MKI67;PHF2;RB1;DNMT3B;RELA;SMARCC1;KDM1A		CHEK1;KAT2B;SMARCC1;TP53;RB1;MKI67;CHAF1A;DNMT1;DNMT3B;BRCA2;AURKA;MAPK8;PHF2	EP300;CHEK1;HDAC4;RB1;TP53;CHAF1A;PRKAA1;MKI67;DNMT1;ESR1;CREBBP;KAT2B;ASH2L;HDAC1;KDM5A;GATA3;DNMT3B;AURKA;PHF2;SMARCC2;KDM4B;SMARCC1;TWIST1;NCOA1;CTNNB1;MAPK8;BRCA2;SIRT6;KDM4A	DNMT3B;ATM;NCOA1;CTNNB1;PHF2;SMARCA4;PRKAA1;HDAC4;SIRT6;KDM4A;MYC;EHMT2;KDM1A;KAT2B;CREBBP;SMARCC1;MAPK8;RELA;AURKA;MKI67;KDM4B;BRCA2;CHEK1;KDM5C;TP53;RB1	DNMT3B;RB1;RELA;DNMT1;MKI67;MAPK8;CHEK1;NCOA3;PHF2;KDM1A;SMARCC1;BRCA2;CBX3;CHAF1A;KAT2B;TP53;MYC;HDAC3;SETD1A;AURKA;EHMT2	ASH2L;ESR1;EP300;CTNNB1;SMARCC2;TWIST1;HDAC1;KDM5A;KDM4B;CREBBP;KDM4A;PRKAA1;GATA3;SIRT6;HDAC4;NCOA1	KDM4A;ASH2L;ESR1;NCOA1;KDM5A;HDAC4;SMARCA4;KDM4B;CREBBP;CTNNB1	EZH2;DNMT3B	15		11	3	7	12
GO_MULTICELLULAR_ORGANISMAL_HOMEOSTASIS	3.898	8.017	4.002	8.666	10.416	9.743	8.917	5.336	10.852	5.119	13.77		3.655	12.735	13.558	4.7	10.301	7.468	1.696	PIK3CA;RB1;KDM1A;PDGFRB;SRC;PTGS2		STAT6;EGFR;HDAC3;CAV1;MET;PRKAA1;STAT3;ITGB1;PRKAB1;IGF1R		EGFR;MET;STAT3;CAV1;HDAC3	CLDN1;BAX;MET;SIRT6;PRKAA1;FOXO1;MAP2K6;CTNNB1;ITGB1;NOTCH1;STAT6	PRKAB1;STAT3;RB1;PIK3CA;MAP2K6;EGFR;ITGB1;MET;STAT6;SIRT6;CAV1;HDAC3;FOXO1		FOXO1;MAP2K6;BAX;SIRT6;STAT6;CAV1;EGFR;CTNNB1;ITGB1;MET;NOTCH1;PRKAA1		FOXO1;MAP2K6;STAT6;CAV1;MET;EGFR;PIK3CA;HDAC3;RB1;STAT3;SIRT6	PRKAB1;PRKAA1;STAT6;EGFR;IGF1R;ITGB1	HDAC3;FOXO1;CTNNB1;MAP2K6;MET;PDGFRB;STAT3;KDM1A;PIK3CA;YAP1;EGFR;NOTCH1;ITGB1;PTGS2;STAT6;RB1		PTGS2;KDM1A;PDGFRB;PIK3CA;HDAC3;STAT3;SRC;RB1	CLDN1;PDGFRB;ITGB1;KDM1A;PRKAA1;HDAC3;CTNNB1;BAX;SIRT6;MAP2K6;STAT3;STAT6;NOTCH1;PTGS2;PIK3CA;RB1;MET;FOXO1;SRC		PIK3CA;STAT6;SRC;RB1;PTGS2;PDGFRB	PTGS2;BAX;TNFSF11;SRC;MAP2K6;PIK3CA;FOXO1;CAV1;RB1;CLDN1;STAT6;PDGFRB;CTNNB1;ITGB1;SIRT6;PRKAA1;MET;NOTCH1	MET;CTNNB1;FOXO1;KDM1A;NOTCH1;STAT6;PDGFRB;PRKAA1;SRC;CAV1;SIRT6;BAX;MAP2K6;PTGS2;ITGB1;PIK3CA;RB1;EGFR	PIK3CA;STAT6;PDGFRB;KDM1A;RB1;PTGS2;HDAC3;STAT3	CTNNB1;ITGB1;MAP2K6;FOXO1;CAV1;TNFSF11;BAX;NOTCH1;MET;PRKAA1;CLDN1;STAT6;SIRT6	NOTCH1;FOXO1;ITGB1;STAT6;CTNNB1;MAP2K6;MET;EGFR;YAP1	ITGB1;PRKAB1	6		10		5	11
GO_NEGATIVE_REGULATION_OF_CELL_DIFFERENTIATION	3.31	7.976	4.45	5.479	8.902	7.34	6.605	4.744	9.992	2.821	7.803		2.384	10.665	10.423	3.202	8.817	7.561	3.261	RB1;TP53;ANXA1;STAT1;MED1;MYC		EGFR;ERBB2;CAV1;SOCS1;VIM;DNMT1;GATA3;STAT3;ANXA1;TP53;ITGB1	CAV1;TP53;ERBB2	EGFR;GATA3;CAV1;STAT3;ERBB2;DNMT1	VIM;ERBB2;PTEN;FOXO1;CTNNB1;ITGB1;HDAC4;NOTCH1;NFKBIA	MED1;STAT3;VIM;NFKBIA;EGFR;DNMT1;ITGB1;EZH2;HDAC4;ERBB2;RB1;CAV1;FOXO1		FOXO1;HDAC4;VIM;ERBB2;EGFR;PTEN;CTNNB1;ITGB1;NOTCH1;CAV1;NFKBIA		FOXO1;ERBB2;CAV1;EGFR;DNMT1;RB1;MED1;STAT3;HDAC4;NFKBIA	SOCS1;VIM;ANXA1;TP53;EGFR;ITGB1	FOXO1;HDAC4;CTNNB1;MYC;VIM;STAT3;NFKBIA;ITGB1;YAP1;STAT1;EGFR;DNMT1;ANXA1;TP53;RB1;ZEB1;NOTCH1	TP53;ERBB2;CAV1	TP53;ANXA1;MYC;STAT3;STAT1;RB1	RB1;ERBB2;HDAC4;NFKBIA;FOXO1;ITGB1;MYC;TP53;STAT1;NOTCH1;ANXA1;STAT3;PTEN;CTNNB1;VIM		STAT1;ANXA1;TP53;RB1;DNMT1	DNMT1;TWIST1;VIM;NFKBIA;FOXO1;HDAC4;ANXA1;RB1;CAV1;CTNNB1;TP53;MED1;ITGB1;STAT1;ZEB1;ERBB2;GATA3;NOTCH1	ERBB2;ANXA1;CTNNB1;FOXO1;NOTCH1;STAT1;CAV1;HDAC4;MED1;NFKBIA;VIM;ITGB1;MYC;PTEN;TP53;RB1;EGFR	STAT1;MYC;TP53;RB1;STAT3;ANXA1;DNMT1	CTNNB1;ZEB1;NFKBIA;TWIST1;ITGB1;FOXO1;CAV1;ERBB2;NOTCH1;GATA3;HDAC4;MED1;VIM	NOTCH1;FOXO1;ITGB1;HDAC4;VIM;CTNNB1;EGFR;YAP1;ZEB1;NFKBIA	MED1;EZH2;ITGB1;VIM	6		11	3	6	9
GO_NEGATIVE_REGULATION_OF_TRANSCRIPTION_BY_RNA_POLYMERASE_II	9.147	7.976	3.972	5.542	12.946	6.338	10.882	4.224	18.441	7.873	13.548		4.772	18.944	14.698	11.08	15.24	7.684	3.828	FOXK2;EHMT2;RB1;TP53;SMARCA4;FGFR1;JUN;KDM1A;STAT1;RELA;MED1;DNMT3B;MYC		HDAC3;CAV1;DNMT1;GATA3;DNMT3B;STAT3;SMAD2;TP53;JUN;SQSTM1;STAT6;RELA	CAV1;SQSTM1;RELA;TP53	SMAD2;GATA3;STAT3;DNMT1;CAV1;HDAC3	ESR1;SIRT6;CREBBP;SMAD2;FOXO1;CTNNB1;HDAC4;KLF4;NOTCH1;STAT6	SMAD2;KLF4;MED1;STAT3;DNMT3B;RB1;PIAS1;CTBP2;CREBBP;DNMT1;EZH2;RELA;HDAC4;STAT6;SIRT6;CAV1;HDAC3;FOXO1		FOXO1;HDAC4;SIRT6;RELA;STAT6;CAV1;CREBBP;CTNNB1;KLF4;NOTCH1;SMAD2		FOXO1;STAT6;PIAS1;CAV1;DNMT1;HDAC3;CTBP2;RB1;STAT3;RELA;HDAC4;MED1;SIRT6;CREBBP;SMAD2	JUN;RELA;STAT6;TP53;DNMT3B;SQSTM1	HDAC4;RELA;TP53;EHMT2;FOXO1;KDM1A;CREBBP;STAT1;SMARCA4;NOTCH1;STAT6;ZEB1;RB1;KLF4;MYC;JUN;KDM5A;STAT3;ESR1;SQSTM1;DNMT1;DNMT3B;HDAC3;CTNNB1;FGFR1;FOXK2;PIAS1	TP53;SQSTM1;CAV1;RELA	KDM1A;EHMT2;TP53;FOXK2;HDAC3;RELA;MYC;STAT3;STAT1;JUN;FGFR1;RB1;DNMT3B	HDAC4;TP53;STAT1;HDAC3;CTNNB1;EHMT2;SIRT6;FOXK2;MYC;CREBBP;FGFR1;JUN;STAT3;STAT6;NOTCH1;SMAD2;ESR1;RB1;DNMT3B;KLF4;FOXO1;RELA;KDM1A		STAT1;STAT6;TP53;RB1;FOXK2;DNMT1;DNMT3B;FGFR1;JUN	FGFR1;EP300;HDAC4;RB1;STAT6;TP53;ZEB1;FOXK2;DNMT1;ESR1;CREBBP;AR;SQSTM1;FOXO1;CAV1;HDAC1;KDM5A;MED1;GATA3;DNMT3B;TWIST1;JUN;CTNNB1;SMAD2;KLF4;STAT1;SIRT6;NOTCH1	DNMT3B;CTNNB1;FOXO1;SMARCA4;HDAC4;SIRT6;MYC;FGFR1;EHMT2;KDM1A;CAV1;MED1;CREBBP;NOTCH1;STAT6;RELA;FOXK2;SMAD2;STAT1;JUN;KLF4;TP53;RB1	PIAS1;STAT6;SQSTM1;STAT1;DNMT3B;FGFR1;KDM1A;FOXK2;TP53;RB1;MYC;HDAC3;RELA;DNMT1;EHMT2;STAT3;JUN	ESR1;SMAD2;SQSTM1;CTNNB1;KDM5A;NOTCH1;GATA3;HDAC4;MED1;EP300;TWIST1;FOXO1;SIRT6;KLF4;ZEB1;HDAC1;AR;CAV1;CREBBP;STAT6	NOTCH1;ESR1;FOXO1;KDM5A;HDAC4;STAT6;SMARCA4;CREBBP;KLF4;CTNNB1;ZEB1	SMAD2;MED1;EZH2;DNMT3B;KLF4	13		12	4	6	10
GO_CELLULAR_RESPONSE_TO_STARVATION	5.119	7.96		4.909	5.877	6.184	4.979	8.013	9.727	4.719	9.528		3.728	9.581	11.429	5.614	5.889	4.115		EHMT2;TP53;JUN;ATG7;MAPK8		CDKN1A;PRKAA1;RPTOR;MTOR;TP53;JUN;MAP1LC3B	RPTOR;TP53		PRKAA1;MAP1LC3A;MTOR;FOXO1;CDKN1A	MAP1LC3B;BECN1;MTOR;MAPK8;RPTOR;FOXO1		FOXO1;MAP1LC3A;RPTOR;MTOR;CDKN1A;PRKAA1		FOXO1;RPTOR;MTOR;MAPK8;BECN1	JUN;MTOR;MAP1LC3B;CDKN1A;PRKAA1;TP53	FOXO1;JUN;MAP1LC3A;MTOR;RPTOR;CDKN1A;MAPK8;TP53;EHMT2;ATG7	TP53;RPTOR	EHMT2;TP53;MAPK8;ATG7;JUN	MTOR;EHMT2;ATG7;MAP1LC3A;FOXO1;CDKN1A;TP53;PRKAA1;JUN;MAPK8		ATG7;MAPK8;TP53;JUN	MAP1LC3A;JUN;ATG7;CDKN1A;FOXO1;MAPK8;TP53;PRKAA1;MTOR;RPTOR	CDKN1A;EHMT2;FOXO1;MAPK8;MTOR;PRKAA1;JUN;MAP1LC3A;RPTOR;ATG7;TP53	ATG7;JUN;RPTOR;MAPK8;TP53;EHMT2	RPTOR;MAP1LC3A;FOXO1;CDKN1A;PRKAA1;MTOR	MTOR;CDKN1A;MAP1LC3A;FOXO1		5		7	2		5
GO_REGULATION_OF_PEPTIDYL_TYROSINE_PHOSPHORYLATION	2.263	7.885	5.204	2.107	4.74	2.955	5.154	4.146	4.607	3.8	5.415		3.046	5.452	4.76	2.656	2.803	2.431		PDGFRB;TP53;SRC		EGFR;KIT;CAV1;SOCS1;STAT3;MTOR;ERBB3;TP53	CAV1;TP53	EGFR;STAT3;ERBB3;KIT;CAV1	MTOR;ITGA5;SHC1	STAT3;MTOR;KIT;EGFR;ERBB3;CAV1		ITGA5;MTOR;CAV1;EGFR		ERBB3;CAV1;MTOR;EGFR;STAT3;KIT	MTOR;EGFR;TP53;SOCS1	KIT;ITGA5;PDGFRB;STAT3;MTOR;EGFR;TP53	TP53;CAV1	PDGFRB;TP53;STAT3;SRC;KIT	MTOR;PDGFRB;TP53;ITGA5;SHC1;STAT3;KIT;SRC		PDGFRB;TP53;SRC;KIT	ERBB3;KIT;SRC;CAV1;PDGFRB;TP53;ITGA5;MTOR	ITGA5;MTOR;PDGFRB;CAV1;SRC;TP53;EGFR	STAT3;KIT;PDGFRB;TP53	ERBB3;MTOR;ITGA5;CAV1	MTOR;EGFR;ITGA5		3		8	2	5	3
GO_POSITIVE_REGULATION_OF_CELLULAR_COMPONENT_ORGANIZATION	6.97	7.816	4.321	8.13	12.317	8.005	9.466	3.714	12.799	8.492	17.091		9.264	18.232	14.431	9.486	10.089	4.043	2.694	RB1;TP53;ANXA1;KDM1A;PDGFRB;BAD;AURKA;ULK1;MAPK8;FGFR1;SRC;DNMT3B		BAD;KIT;CAV1;MET;DNMT1;PRKAA1;GATA3;ATM;DNMT3B;MTOR;ANXA1;TP53;IGF1R	CAV1;ATR;BAD;TP53	GATA3;CAV1;ATM;MET;BAD;KIT;DNMT1	ESR1;CLDN1;BAX;MET;PRKAA1;ATR;RET;MTOR;BAK1;CDKN1B;HDAC4;CTNNB1;MAP2K1;SIRT6	BECN1;DNMT3B;MAPK8;DNMT1;HDAC4;MET;SIRT6;KDR;YWHAZ;BAK1;KIT;ILK;EZH2;ATM;CDKN1B;MTOR;RB1;CAV1;BAD		ILK;HDAC4;BAD;BAX;SIRT6;MAP2K1;CAV1;MTOR;CDKN1B;ATM;RET;CTNNB1;MET;PRKAA1		CDKN1B;KIT;CAV1;MET;MTOR;MAPK8;DNMT1;ILK;RB1;KDR;BECN1;HDAC4;BAD;SIRT6;ATM	ANXA1;MTOR;PRKAA1;TP53;DNMT3B;IGF1R	HDAC4;PDGFRB;MAP2K1;TP53;ULK1;KDM1A;AURKA;RB1;KDR;KIT;RET;ESR1;MAPK8;DNMT1;DNMT3B;CTNNB1;FGFR1;BAD;MET;HK2;MTOR;ATR;CDKN1B;ANXA1	TP53;CAV1;ATR	KDM1A;PDGFRB;TP53;KDR;ANXA1;MAPK8;BAD;ULK1;SRC;AURKA;ALK;KIT;FGFR1;RB1;DNMT3B	AURKA;ATR;CLDN1;PDGFRB;HDAC4;RET;KDM1A;TP53;CDKN1B;PRKAA1;CTNNB1;BAX;MTOR;SIRT6;FGFR1;ALK;KDR;BAK1;MAPK8;ESR1;BAD;RB1;DNMT3B;MAP2K1;MET;ULK1;ANXA1;KIT;SRC		ANXA1;BAD;TP53;SRC;KIT;RB1;MAPK8;DNMT1;DNMT3B;ULK1;RET;AURKA;KDR;PDGFRB;FGFR1	FGFR1;BAX;EP300;HDAC4;RB1;PDGFRB;KDR;TP53;PRKAA1;DNMT1;ESR1;CDKN1B;AR;SRC;MAP2K1;CAV1;CLDN1;GATA3;MET;DNMT3B;KIT;AURKA;MTOR;BAD;ANXA1;CTNNB1;MAPK8;RET;SIRT6;ULK1	DNMT3B;ATM;CTNNB1;ILK;PDGFRB;PRKAA1;HDAC4;SIRT6;FGFR1;ANXA1;MET;KDM1A;MTOR;CAV1;MAPK8;SRC;MAP2K1;AURKA;RET;ULK1;BAX;BAD;CDKN1B;TP53;RB1	HK2;PDGFRB;ULK1;MAPK8;DNMT3B;KDM1A;FGFR1;KDR;BAD;RB1;TP53;ATR;DNMT1;ANXA1;AURKA;RET;KIT	ESR1;EP300;MAP2K1;CTNNB1;AR;RET;CAV1;PRKAA1;GATA3;MET;BAX;CLDN1;BAD;HDAC4;SIRT6;CDKN1B;MTOR	MTOR;ESR1;HDAC4;MAP2K1;RET;CDKN1B;CTNNB1;MET	EZH2;DNMT3B;BAK1;YWHAZ	12		13	4	7	14
GO_RECEPTOR_SIGNALING_PATHWAY_VIA_STAT	2.733	7.793	3.304	2.567	4.529	3.584	4.871	4.793	8.195	5.815	7.997		7.468	8.072	5.948	8.127	3.419	2.905		STAT1;STAT5A;STAT2		STAT6;KIT;CAV1;SOCS1;STAT3;STAT4;STAT5A		CAV1;STAT3;KIT	RET;STAT6;NOTCH1	STAT3;PIAS1;KIT;STAT6;CAV1		STAT6;CAV1;NOTCH1;RET		STAT6;PIAS1;CAV1;STAT3;KIT	STAT4;STAT6;SOCS1;STAT5A	KIT;STAT2;STAT3;RET;STAT5A;STAT1;NOTCH1;STAT6;PIAS1		STAT5A;STAT2;STAT3;KIT;STAT1;STAT4	STAT2;STAT6;RET;STAT5A;NOTCH1;STAT1;STAT3;KIT;STAT4		STAT2;STAT1;STAT4;STAT6;KIT;RET;STAT5A	STAT4;KIT;CAV1;STAT6;STAT5A;STAT2;STAT1;RET;NOTCH1	STAT6;STAT1;CAV1;STAT5A;STAT2;RET;NOTCH1	STAT6;PIAS1;STAT1;KIT;STAT5A;STAT3;RET;STAT2	STAT6;NOTCH1;RET;CAV1	NOTCH1;STAT6;RET		3		7		3	3
GO_REGULATION_OF_PROTEIN_LOCALIZATION	4.2	7.775	3.891	1.312	4.1	2.404	3.199	5.12	5.102	5.029	5.523		3.186	4.888	5.357	4.523	2.762			RB1;TP53;ANXA1;KDM1A;BAD;MAPK8;SRC;PTGS2		BAD;EGFR;ERBB2;HDAC3;SOCS1;PRKAA1;STAT3;TP53;ANXA1;SQSTM1;ITGB1;BCL2L1	SQSTM1;BAD;TP53;ERBB2	EGFR;BAD;STAT3;ERBB2;BCL2L1;HDAC3	PRKAA1;ERBB2;ITGB1;CTNNB1	STAT3;MAPK8;EGFR;ITGB1;ERBB2;YWHAZ;RB1;HDAC3;BAD		BAD;ERBB2;EGFR;CTNNB1;ITGB1;PRKAA1		ERBB2;EGFR;MAPK8;HDAC3;RB1;STAT3;BAD	SOCS1;ANXA1;PRKAA1;TP53;EGFR;SQSTM1;ITGB1	HDAC3;CTNNB1;BAD;EGFR;STAT3;KDM1A;SQSTM1;MAPK8;ITGB1;PTGS2;TP53;ANXA1;RB1	TP53;SQSTM1;ERBB2	PTGS2;KDM1A;TP53;ANXA1;HDAC3;MAPK8;BAD;STAT3;SRC;RB1	BAD;RB1;ERBB2;ITGB1;KDM1A;TP53;PTGS2;MAPK8;ANXA1;PRKAA1;HDAC3;STAT3;CTNNB1;SRC		ANXA1;BAD;TP53;SRC;RB1;PTGS2;MAPK8	BAD;PTGS2;AR;SRC;SQSTM1;ANXA1;RB1;MAPK8;CTNNB1;TP53;ITGB1;ERBB2;PRKAA1	ERBB2;ANXA1;CTNNB1;KDM1A;MAPK8;PRKAA1;SRC;BAD;PTGS2;ITGB1;TP53;RB1;EGFR	MAPK8;KDM1A;TP53;RB1;BAD;PTGS2;HDAC3;ANXA1;SQSTM1;STAT3	CTNNB1;ITGB1;AR;ERBB2;PRKAA1;BAD;SQSTM1			8		12	4	6	4
GO_REGULATION_OF_TOR_SIGNALING	2.142	7.772	5.44	3.19	7.175	5.917	7.61	2.621	4.772	3.092	5.933		2.047	5.967	7.618	4.139	4.285			PIK3CA;DEPTOR		DEPTOR;AKT1S1;HDAC3;PRKAA1;RPTOR;ATM		RPTOR;ATM;DEPTOR;HDAC3	PRKAA1;TSC2;AKT1S1	TSC2;DEPTOR;PIK3CA;ATM;RPTOR;HDAC3		RPTOR;AKT1S1;ATM;TSC2;PRKAA1		RPTOR;TSC2;PIK3CA;DEPTOR;HDAC3;ATM	PRKAA1;AKT1S1	HDAC3;TSC2;RPTOR;PIK3CA;DEPTOR		DEPTOR;PIK3CA;HDAC3	DEPTOR;AKT1S1;TSC2;PRKAA1;PIK3CA;HDAC3		PIK3CA;DEPTOR	DEPTOR;TSC2;PIK3CA;AKT1S1;PRKAA1;RPTOR	ATM;DEPTOR;PRKAA1;TSC2;RPTOR;AKT1S1;PIK3CA	PIK3CA;RPTOR;HDAC3;DEPTOR	AKT1S1;PRKAA1;RPTOR;TSC2			2		6		4	3
GO_NEGATIVE_REGULATION_OF_DEVELOPMENTAL_PROCESS	3.426	7.724	3.868	8.125	9.371	10.044	6.426	5.089	12.615	2.86	10.257		2.512	13.173	13.183	3.14	11.382	10.855	3.759	BRCA2;RB1;TP53;ANXA1;STAT1;MED1;MYC		EGFR;ERBB2;CDKN1A;CAV1;SOCS1;VIM;DNMT1;GATA3;STAT3;ANXA1;TP53;ITGB1	CAV1;TP53;ERBB2	EGFR;GATA3;CAV1;STAT3;ERBB2;DNMT1	VIM;ERBB2;PRKDC;PTEN;CDKN1B;FOXO1;CTNNB1;ITGB1;KLF4;HDAC4;NOTCH1;CDKN1A;NFKBIA	KLF4;MED1;STAT3;VIM;CDKN1B;NFKBIA;EGFR;DNMT1;ITGB1;EZH2;HDAC4;ERBB2;RB1;CAV1;FOXO1		FOXO1;HDAC4;VIM;PRKDC;ERBB2;CAV1;CDKN1B;EGFR;CDKN1A;PTEN;CTNNB1;KLF4;NOTCH1;ITGB1;NFKBIA		CDKN1B;ERBB2;FOXO1;CAV1;EGFR;DNMT1;RB1;MED1;STAT3;HDAC4;NFKBIA	SOCS1;VIM;ANXA1;CDKN1A;TP53;EGFR;ITGB1	HDAC4;VIM;TP53;PRKDC;FOXO1;NFKBIA;YAP1;STAT1;EGFR;NOTCH1;ZEB1;RB1;KLF4;MYC;BRCA2;STAT3;DNMT1;ITGB1;CTNNB1;CDKN1B;CDKN1A;ANXA1	TP53;ERBB2;CAV1	TP53;BRCA2;ANXA1;MYC;STAT3;STAT1;RB1	BRCA2;HDAC4;NFKBIA;ITGB1;TP53;CDKN1B;STAT1;PTEN;CTNNB1;VIM;PRKDC;ERBB2;MYC;STAT3;NOTCH1;RB1;KLF4;FOXO1;CDKN1A;ANXA1		STAT1;ANXA1;TP53;RB1;DNMT1;BRCA2	HDAC4;RB1;TP53;ZEB1;DNMT1;CDKN1B;FOXO1;CAV1;MED1;GATA3;PRKDC;TWIST1;VIM;CDKN1A;NFKBIA;ANXA1;CTNNB1;ITGB1;STAT1;BRCA2;KLF4;ERBB2;NOTCH1	ERBB2;CTNNB1;FOXO1;HDAC4;ITGB1;MYC;PRKDC;CDKN1A;ANXA1;CAV1;MED1;NOTCH1;BRCA2;VIM;CDKN1B;EGFR;STAT1;NFKBIA;KLF4;PTEN;TP53;RB1	STAT1;MYC;BRCA2;TP53;RB1;STAT3;ANXA1;DNMT1	CTNNB1;ZEB1;NFKBIA;PRKDC;TWIST1;ITGB1;FOXO1;CAV1;CDKN1A;ERBB2;GATA3;NOTCH1;HDAC4;MED1;CDKN1B;VIM;KLF4	NOTCH1;FOXO1;ITGB1;HDAC4;PRKDC;KLF4;VIM;CDKN1B;CTNNB1;CDKN1A;EGFR;YAP1;ZEB1;NFKBIA	ITGB1;MED1;EZH2;KLF4;VIM	7		12	3	6	13
GO_NEGATIVE_REGULATION_OF_TRANSFERASE_ACTIVITY	4.095	7.668	2.769	4.914	8.092	8.523	8.785	5.303	7.445	4.696	9.487		4.934	10.748	12.606	4.382	5.667	3.324		RB1;DEPTOR;TP53;SRC;KAT2B		DEPTOR;AKT1S1;CDKN1A;CAV1;SOCS1;RPTOR;TP53;IGF1R	RPTOR;CAV1;TP53	RPTOR;CAV1;DEPTOR	TSC2;PTEN;AKT1S1;CDKN1B;CDKN1A;LRP6	TSC2;DEPTOR;CDKN1B;LRP6;CASP3;ILK;RPTOR;RB1;CAV1		ILK;RPTOR;AKT1S1;CDKN1B;CDKN1A;PTEN;TSC2;LRP6;CAV1		CASP3;CDKN1B;RPTOR;CAV1;TSC2;ILK;DEPTOR;RB1;LRP6	SOCS1;CDKN1A;TP53;IGF1R;AKT1S1	TSC2;CASP3;RPTOR;KAT2B;CDKN1B;LRP6;CDKN1A;TP53;DEPTOR;RB1	TP53;CAV1;RPTOR	TP53;CASP3;KAT2B;SRC;DEPTOR;RB1	RB1;AKT1S1;DEPTOR;KAT2B;CDKN1B;CDKN1A;TP53;TSC2;LRP6;PTEN;CASP3;SRC		TP53;SRC;RB1;DEPTOR;KAT2B;CASP3	DEPTOR;CDKN1B;KAT2B;SRC;TSC2;CDKN1A;LRP6;CAV1;RB1;CASP3;TP53;AKT1S1;RPTOR	CDKN1A;ILK;PTEN;LRP6;CDKN1B;DEPTOR;CAV1;SRC;KAT2B;TSC2;RPTOR;AKT1S1;TP53;RB1	RPTOR;KAT2B;TP53;RB1;CASP3;DEPTOR	RPTOR;LRP6;AKT1S1;TSC2;CAV1;CDKN1A;CDKN1B	TSC2;CDKN1A;LRP6;CDKN1B		5		8	3	3	6
GO_REGULATION_OF_LIPID_METABOLIC_PROCESS	5.381	7.639	4.384	5.036	7.839	6.031	7.392	3.488	7.893	5.748	10.789		5.062	13.175	10.38	4.422	7.801	3.681	1.863	PDK1;RB1;ANXA1;PDGFRB;MED1;SRC;PTGS2		PDGFRA;KIT;CAV1;HDAC3;NCOA1;SOCS1;PRKAA1;MTOR;ANXA1		PDGFRA;NCOA1;KIT;CAV1;HDAC3	NCOA1;PDGFRA;IDH1;CREBBP;PRKAA1;MTOR;KLF4	KLF4;MED1;NCOA1;PDK1;MTOR;CREBBP;KIT;RB1;CAV1;HDAC3		CAV1;MTOR;PDK1;CREBBP;NCOA1;IDH1;KLF4;PRKAA1		PDK1;KIT;CAV1;MTOR;HDAC3;RB1;NCOA1;MED1;CREBBP	MTOR;PRKAA1;SOCS1;ANXA1	KLF4;HDAC3;PDGFRA;NCOA1;KIT;PDK1;PDGFRB;MTOR;CREBBP;ANXA1;PTGS2;RB1		PTGS2;PDGFRB;ANXA1;PDK1;HDAC3;SRC;KIT;RB1	NCOA1;MTOR;RB1;PDGFRB;KLF4;KIT;IDH1;CREBBP;PTGS2;ANXA1;PRKAA1;HDAC3;PDGFRA;PDK1;SRC		ANXA1;SRC;KIT;RB1;PDK1;PTGS2;PDGFRB	PDK1;PTGS2;CREBBP;TWIST1;SRC;KIT;NCOA1;CAV1;RB1;ANXA1;IDH1;PDGFRB;MED1;KLF4;PDGFRA;PRKAA1;MTOR	ANXA1;NCOA1;IDH1;MTOR;PDGFRB;PRKAA1;SRC;CAV1;MED1;PDK1;PTGS2;CREBBP;KLF4;RB1	PDK1;PDGFRB;RB1;PTGS2;HDAC3;ANXA1;KIT	PDGFRA;TWIST1;CAV1;CREBBP;PRKAA1;MED1;NCOA1;MTOR;IDH1;KLF4	MTOR;PDGFRA;NCOA1;CREBBP;KLF4	MED1;KLF4	7		9		5	7
GO_REPLICATIVE_SENESCENCE		7.605	3.804	7.4	5.121	7.413	5.32	3.903	8.561	3.282	8.469		5.231	6.471	8.748	6.996	3.267	3.571				CDKN1A;TP53;CHEK1;ATM	CHEK1;ATR;TP53	ATM;CHEK1	ATR;CDKN1A;CHEK2;CHEK1	ATM;CHEK1;CHEK2		ATM;CHEK2;CDKN1A;CHEK1		ATM;CHEK1;CHEK2	CDKN1A;TP53	CHEK1;CHEK2;ATR;CDKN1A;TP53	TP53;CHEK1;ATR	CHEK2;TP53	ATR;CHEK2;CHEK1;CDKN1A;TP53		CHEK2;CHEK1;TP53	CHEK2;TP53;CDKN1A;CHEK1	CDKN1A;ATM;CHEK1;TP53;CHEK2	CHEK2;CHEK1;ATR;TP53	CDKN1A;CHEK2	CDKN1A;CHEK2				4	3	2	4
GO_REGULATION_OF_LEUKOCYTE_DIFFERENTIATION	5.101	7.541	2.731	2.85	2.643	3.737	2.916	5.232	7.297	4.609	7.092		3.814	9.367	7.557	4.299	6.714	3.275		RB1;ANXA1;FOS;JUN;BAD;MYC		BAD;ERBB2;FOS;SOCS1;GATA3;MTOR;ANXA1;JUN	FOS;BAD;ERBB2	BAD;ERBB2;GATA3	ERBB2;MTOR;CTNNB1;PRKDC	ERBB2;RB1;MTOR;BAD		BAD;PRKDC;ERBB2;MTOR;CTNNB1		BAD;RB1;ERBB2;MTOR	JUN;SOCS1;ANXA1;MTOR;FOS	PRKDC;CTNNB1;MYC;BAD;JUN;MTOR;FOS;ANXA1;ZEB1;RB1	FOS;ERBB2	FOS;ANXA1;BAD;MYC;JUN;RB1	MTOR;BAD;RB1;PRKDC;ERBB2;MYC;CTNNB1;ANXA1;JUN;FOS		ANXA1;BAD;RB1;FOS;JUN	BAD;JUN;TNFSF11;PRKDC;RB1;ANXA1;FOS;CTNNB1;ZEB1;ERBB2;GATA3;MTOR	ERBB2;ANXA1;CTNNB1;MTOR;FOS;JUN;BAD;MYC;PRKDC;RB1	FOS;MYC;BAD;RB1;ANXA1;JUN	CTNNB1;ZEB1;PRKDC;ERBB2;TNFSF11;GATA3;BAD;MTOR	MTOR;CTNNB1;ZEB1;PRKDC		6		8	3	3	4
GO_CD4_POSITIVE_ALPHA_BETA_T_CELL_ACTIVATION		7.534	2.478	1.967	2.936	1.952	3.146	5.474	3.447	1.874	3.374		1.971	3.392	2.494	2.834	2.951	2.191				SOCS1;GATA3;STAT3;MTOR;ANXA1;STAT6		STAT3;GATA3	MTOR;STAT6	STAT6;STAT3;MTOR		STAT6;MTOR		STAT6;STAT3;MTOR	MTOR;STAT6;SOCS1;ANXA1	ANXA1;STAT6;STAT3;MTOR		STAT3;ANXA1	STAT3;MTOR;STAT6;ANXA1		STAT6;ANXA1	STAT6;GATA3;MTOR;ANXA1	STAT6;MTOR;ANXA1	STAT6;STAT3;ANXA1	STAT6;GATA3;MTOR	MTOR;STAT6				6		2	2
GO_POSITIVE_REGULATION_OF_NEURON_DEATH	4.531	7.534	2.478	4.349	5.477	7.216	5.843	5.474	8.542	5.529	9.838		5.742	9.892	10.298	5.246	5.47	3.42		FOS;BAD;TP53;JUN		BAD;FOS;ATM;MTOR;JUN;TP53	FOS;BAD;TP53	ATM;BAD	BAX;MTOR;CTNNB1;HDAC4	ATM;MTOR;CASP3;HDAC4;BAD		HDAC4;BAD;BAX;MTOR;ATM;CTNNB1		CASP3;MTOR;HDAC4;BAD;ATM	JUN;MTOR;TP53;FOS	HDAC4;CTNNB1;BAD;JUN;FOS;CASP3;MTOR;TP53	TP53;FOS	TP53;FOS;CASP3;BAD;JUN	MTOR;BAD;BAX;HDAC4;TP53;CTNNB1;JUN;FOS;CASP3		BAD;TP53;FOS;CASP3;JUN	BAD;BAX;JUN;CASP3;HDAC4;FOS;CTNNB1;TP53;MTOR	ATM;CTNNB1;MTOR;FOS;HDAC4;BAX;JUN;BAD;TP53	FOS;TP53;BAD;CASP3;JUN	CTNNB1;BAX;BAD;HDAC4;MTOR	MTOR;HDAC4;CTNNB1		4		6	3	2	4
GO_REGULATION_OF_CHROMATIN_ORGANIZATION	6.14	7.534	5.826	2.469	6.829	3.453	5.974	2.127	10.436	5.603	7.673		7.215	11.613	9.405	9.189	4.348	1.738		TP53;KDM1A;PHF2;MAPK8;MKI67;DNMT3B		DNMT1;ATM;GATA3;DNMT3B;TP53;CHEK1;PHF8	CHEK1;TP53	GATA3;ATM;CHEK1;PHF8;DNMT1	CTNNB1;SIRT6;CHEK1	CHEK1;PHF8;DNMT3B;ATM;MAPK8;DNMT1;SIRT6		SIRT6;ATM;CTNNB1;CHEK1		CHEK1;ATM;MAPK8;DNMT1;SIRT6;PHF8	TP53;DNMT3B	CTNNB1;SETD1A;PHF2;KDM5A;KDM1A;MKI67;CHEK1;MAPK8;DNMT1;DNMT3B;TP53	TP53;CHEK1	KDM1A;TP53;MKI67;PHF2;MAPK8;DNMT3B	MKI67;SIRT6;DNMT3B;PHF2;CHEK1;TP53;MAPK8;CTNNB1;KDM1A		CHEK1;TP53;MKI67;DNMT1;DNMT3B;MAPK8;PHF2	PHF2;DNMT1;DNMT3B;TWIST1;CHEK1;CTNNB1;KDM5A;MAPK8;TP53;SIRT6;GATA3;MKI67	DNMT3B;ATM;CTNNB1;PHF2;KDM1A;MAPK8;SIRT6;TP53;MKI67;CHEK1	MKI67;DNMT3B;MAPK8;PHF2;KDM1A;TP53;CHEK1;SETD1A;DNMT1	CTNNB1;TWIST1;KDM5A;SIRT6;GATA3	KDM5A;CTNNB1		6		7	2	5	3
GO_RESPONSE_TO_PROGESTERONE	5.693	7.518	4.609		5.322	5.533	5.602	3.087	6.107	5.357	6.004		3.932	6.038	7.873	3.672	3.795	2.761		BAD;SRC;RELA;FOS		BAD;CAV1;FOS;NCOA1;RELA	CAV1;FOS;RELA;BAD	BAD;CAV1;NCOA1		NCOA1;BAD;CAV1;RELA		RELA;NCOA1;CAV1;BAD		BAD;CAV1;RELA;NCOA1	RELA;FOS	NCOA1;BAD;RELA;FOS;YAP1	FOS;CAV1;RELA	BAD;RELA;FOS;SRC	NCOA1;BAD;RELA;FOS;SRC		BAD;SRC;FOS	BAD;SRC;NCOA1;CAV1;FOS	NCOA1;CAV1;FOS;SRC;RELA;BAD	RELA;FOS;BAD	NCOA1;BAD;CAV1	YAP1;NCOA1		4		5	4	3
GO_APOPTOTIC_SIGNALING_PATHWAY	11.183	7.514	4.769	5.045	10.891	9.143	9.537	3.013	13.203	12.294	16.141		11.791	17.408	17.263	11.392	8.539	3.924	1.599	PDK1;RB1;DEPTOR;BRCA2;TP53;JUN;KDM1A;BAD;MAPK8;FGFR1;SRC;RELA;PTGS2		BAD;DEPTOR;CDKN1A;CAV1;ATM;TP53;ERBB3;JUN;BCL2L1;RELA	CAV1;RELA;BAD;TP53	ATM;BAD;BCL2L1;ERBB3;DEPTOR;CAV1	BAX;RET;CHEK2;PRKDC;PTEN;BAK1;CTNNB1;CDKN1A	RELA;BECN1;PDK1;RB1;DEPTOR;ATM;BAK1;MAPK8;CASP3;CHEK2;YWHAZ;ERBB3;CAV1;BAD		CHEK2;BAX;BAD;PRKDC;RELA;PDK1;ATM;CDKN1A;RET;PTEN;CTNNB1;CAV1		CASP3;PDK1;ERBB3;BAD;CHEK2;CAV1;MAPK8;DEPTOR;RB1;RELA;BECN1;ATM	CDKN1A;JUN;TP53;RELA	RELA;TP53;PRKDC;PDK1;KDM1A;CHEK2;YAP1;RB1;JUN;BRCA2;CASP3;RET;MAPK8;CTNNB1;FGFR1;BAD;CDKN1A;PTGS2;DEPTOR	TP53;CAV1;RELA	PTGS2;KDM1A;TP53;BRCA2;CASP3;PDK1;RELA;MAPK8;BAD;SRC;JUN;CHEK2;DEPTOR;FGFR1;RB1	CHEK2;BRCA2;RET;TP53;PTEN;CTNNB1;BAX;CASP3;PRKDC;SRC;FGFR1;JUN;PDK1;DEPTOR;PTGS2;BAK1;MAPK8;BAD;RB1;CDKN1A;RELA;KDM1A		BAD;TP53;SRC;RB1;DEPTOR;MAPK8;PDK1;BRCA2;CHEK2;PTGS2;RET;FGFR1;CASP3;JUN	BAX;EP300;RB1;TP53;CHEK2;DEPTOR;AR;SRC;CAV1;HDAC1;PTGS2;PDK1;CASP3;PRKDC;BRCA2;BAD;ERBB3;JUN;CDKN1A;CTNNB1;MAPK8;RET;FGFR1	ATM;CTNNB1;PDK1;FGFR1;PRKDC;CDKN1A;KDM1A;DEPTOR;CAV1;MAPK8;RELA;SRC;BRCA2;RET;PTGS2;BAX;JUN;BAD;CHEK2;PTEN;TP53;RB1	PDK1;MAPK8;FGFR1;KDM1A;BAD;RB1;CHEK2;BRCA2;PTGS2;TP53;CASP3;RELA;RET;DEPTOR;JUN	CTNNB1;EP300;PRKDC;ERBB3;HDAC1;AR;RET;CAV1;CDKN1A;BAX;BAD;CHEK2	CHEK2;RET;PRKDC;CTNNB1;CDKN1A;YAP1	BAK1;YWHAZ	13		10	4	6	8
GO_BEHAVIOR	2.089	7.475	2.845	5.024	5.484	5.909	5.14	6.205	8.034	4.73	9.615		3.388	6.922	7.443	4.328	3.752	3.904		FOS;TP53;JUN;PTGS2		EGFR;KIT;FOS;NCOA1;PRKAA1;STAT3;MTOR;TP53;JUN;ITGB1	FOS;TP53	EGFR;NCOA1;STAT3;KIT	NCOA1;GLS;PRKAA1;ITGA5;PTEN;MTOR;ITGB1;HDAC4	STAT3;NCOA1;PIAS1;MTOR;CASP3;EGFR;KIT;ITGB1;HDAC4		HDAC4;ITGA5;MTOR;EGFR;NCOA1;PTEN;ITGB1;GLS;PRKAA1		CASP3;KIT;PIAS1;MTOR;EGFR;STAT3;HDAC4;NCOA1	JUN;MTOR;PRKAA1;TP53;EGFR;FOS;ITGB1	HDAC4;NCOA1;JUN;KIT;ITGA5;STAT3;MTOR;CASP3;FOS;EGFR;ITGB1;PTGS2;TP53;PIAS1	TP53;FOS	PTGS2;TP53;FOS;CASP3;STAT3;JUN;ALK;KIT	NCOA1;MTOR;HDAC4;GLS;ITGB1;TP53;ALK;PTGS2;ITGA5;PRKAA1;JUN;STAT3;KIT;PTEN;FOS;CASP3		TP53;KIT;FOS;PTGS2;CASP3;JUN	PTGS2;EP300;JUN;KIT;CASP3;NCOA1;HDAC4;FOS;TP53;ITGA5;ITGB1;PRKAA1;MTOR	ITGA5;NCOA1;GLS;MTOR;PRKAA1;HDAC4;FOS;JUN;ITGB1;PTEN;TP53;PTGS2;EGFR	PIAS1;FOS;TP53;PTGS2;CASP3;STAT3;KIT;JUN	EP300;ITGB1;PRKAA1;HDAC4;NCOA1;MTOR;ITGA5	MTOR;NCOA1;HDAC4;ITGB1;EGFR;ITGA5		4		10	2	4	8
GO_REGULATION_OF_PROTEIN_LOCALIZATION_TO_MEMBRANE	2.602	7.444	4.4	1.5	5.466	3.408	3.499	4.601	4.401	2.333	3.34		2.477	5.329	4.537	3.105	4.288	1.714	2.387	BAD;TP53;MAPK8		BAD;EGFR;ERBB2;TP53;SQSTM1;ITGB1;BCL2L1	SQSTM1;BAD;TP53;ERBB2	EGFR;BAD;ERBB2;BCL2L1	ERBB2;ITGB1	MAPK8;EGFR;ITGB1;ERBB2;YWHAZ;BAD		ITGB1;ERBB2;BAD;EGFR		BAD;ERBB2;MAPK8;EGFR	EGFR;TP53;SQSTM1;ITGB1	BAD;EGFR;SQSTM1;MAPK8;ITGB1;TP53	TP53;SQSTM1;ERBB2	BAD;TP53;MAPK8	BAD;ERBB2;ITGB1;TP53;MAPK8		BAD;MAPK8;TP53	BAD;AR;SQSTM1;MAPK8;TP53;ITGB1;ERBB2	ERBB2;MAPK8;BAD;ITGB1;TP53;EGFR	BAD;SQSTM1;TP53;MAPK8	ITGB1;AR;ERBB2;BAD;SQSTM1	ITGB1;EGFR	ITGB1;YWHAZ	3		7	4	4	2
GO_CELL_CYCLE_PHASE_TRANSITION	4.45	7.431	4.733	6.956	10.775	10.181	8.273	3.948	10.911	5.573	10.532		6.018	10.629	14.698	6.959	6.379	5.854	2.523	RB1;TP53;ANXA1;RRM2;AURKA;EIF4EBP1;MYC		EGFR;RPS6KB1;CDKN1A;ATM;RPTOR;ITGB1;ANXA1;TP53;CHEK1;PHF8	RPTOR;CHEK1;TP53	EGFR;ATM;CHEK1;RPS6KB1;PHF8;RPTOR	BAX;CHEK2;PRKDC;PTEN;RPS6KB1;CDKN1B;CDKN1A;ITGB1;KLF4;CHEK1	KLF4;CHEK1;EIF4EBP1;PHF8;PIAS1;ATM;CDKN1B;EGFR;RPTOR;ITGB1;CHEK2;RPS6KB1;RB1;EZH2		CHEK2;BAX;PRKDC;RPTOR;CDKN1B;EGFR;ATM;RPS6KB1;CDKN1A;PTEN;KLF4;CHEK1;ITGB1		RPS6KB1;CDKN1B;CHEK1;RPTOR;PIAS1;CHEK2;EGFR;EIF4EBP1;RB1;PHF8;ATM	ANXA1;CDKN1A;TP53;EGFR;ITGB1	RRM2;PRKDC;KLF4;MYC;RPTOR;CHEK1;CHEK2;CDKN1B;AURKA;EGFR;CDKN1A;ITGB1;RPS6KB1;TP53;ANXA1;RB1;PIAS1	TP53;CHEK1;RPTOR	RRM2;TP53;ANXA1;RPS6KB1;EIF4EBP1;MYC;AURKA;CHEK2;RB1	AURKA;CHEK2;RB1;PRKDC;KLF4;CHEK1;ITGB1;MYC;CDKN1B;CDKN1A;TP53;ANXA1;RPS6KB1;EIF4EBP1;RRM2;PTEN;BAX		CHEK1;ANXA1;EIF4EBP1;TP53;RB1;RPS6KB1;RRM2;AURKA;CHEK2	RRM2;RPS6KB1;CDKN1B;BAX;EP300;CDKN1A;CHEK1;ANXA1;RB1;PRKDC;AURKA;TP53;CHEK2;ITGB1;EIF4EBP1;KLF4;RPTOR	ATM;EIF4EBP1;ITGB1;MYC;PRKDC;CDKN1A;ANXA1;RPTOR;KLF4;AURKA;CDKN1B;CHEK1;EGFR;RRM2;BAX;CHEK2;RPS6KB1;PTEN;TP53;RB1	PIAS1;RPTOR;RRM2;TP53;RB1;CHEK2;MYC;CHEK1;RPS6KB1;ANXA1;AURKA	EP300;PRKDC;RPTOR;ITGB1;RPS6KB1;CDKN1A;BAX;CHEK2;CDKN1B;KLF4	CHEK2;ITGB1;PRKDC;KLF4;CDKN1B;RPS6KB1;CDKN1A;EGFR	EZH2;KLF4;ITGB1	7		10	3	6	10
GO_POSITIVE_REGULATION_OF_ORGANELLE_ORGANIZATION	8.631	7.42	3.745	5.922	10.76	5.861	8.264	3.946	11.949	8.617	14.766		9.225	13.77	13.545	10.159	5.414	2.274	2.521	RB1;TP53;ANXA1;KDM1A;PDGFRB;BAD;AURKA;ULK1;MAPK8;SRC;DNMT3B		BAD;MET;PRKAA1;DNMT1;GATA3;ATM;DNMT3B;MTOR;ANXA1;TP53	ATR;BAD;TP53	GATA3;ATM;MET;BAD;DNMT1	BAX;MET;PRKAA1;ATR;MTOR;BAK1;CDKN1B;CTNNB1;SIRT6	BECN1;DNMT3B;RB1;CDKN1B;ATM;MTOR;KDR;MAPK8;BAK1;DNMT1;MET;YWHAZ;SIRT6;BAD		BAX;BAD;SIRT6;MTOR;CDKN1B;ATM;CTNNB1;MET;PRKAA1		CDKN1B;BAD;MET;MTOR;MAPK8;DNMT1;RB1;KDR;BECN1;SIRT6;ATM	ANXA1;MTOR;PRKAA1;TP53;DNMT3B	KDR;CTNNB1;BAD;MET;ULK1;PDGFRB;HK2;KDM1A;MTOR;ATR;CDKN1B;AURKA;MAPK8;DNMT1;ANXA1;DNMT3B;TP53;RB1	TP53;ATR	KDM1A;PDGFRB;TP53;KDR;ANXA1;MAPK8;BAD;ULK1;SRC;AURKA;RB1;DNMT3B	AURKA;ATR;PDGFRB;TP53;CDKN1B;PRKAA1;CTNNB1;BAX;MTOR;SIRT6;SRC;KDR;BAK1;MAPK8;BAD;RB1;DNMT3B;MET;ULK1;ANXA1;KDM1A		PDGFRB;ANXA1;BAD;TP53;SRC;RB1;DNMT1;DNMT3B;ULK1;AURKA;KDR;MAPK8	BAX;RB1;TP53;PDGFRB;KDR;PRKAA1;DNMT1;CDKN1B;SRC;GATA3;MET;DNMT3B;AURKA;MTOR;BAD;ANXA1;CTNNB1;MAPK8;SIRT6;ULK1	DNMT3B;ATM;CTNNB1;PDGFRB;PRKAA1;SIRT6;ANXA1;MET;KDM1A;MTOR;MAPK8;SRC;AURKA;ULK1;BAX;BAD;CDKN1B;TP53;RB1	HK2;PDGFRB;ULK1;MAPK8;DNMT3B;KDM1A;KDR;BAD;RB1;TP53;ATR;DNMT1;ANXA1;AURKA	CTNNB1;PRKAA1;BAX;MET;GATA3;BAD;SIRT6;CDKN1B;MTOR	MTOR;CDKN1B;MET;CTNNB1	DNMT3B;BAK1;YWHAZ	11		10	3	5	9
GO_NEGATIVE_REGULATION_OF_RNA_BIOSYNTHETIC_PROCESS	9.547	7.411	4.108	7.7	12.719	7.56	11.032	3.537	19.94	8.922	17.103		5.231	20.304	16.567	10.853	15.948	9.371	3.368	FOXK2;EHMT2;RB1;TP53;SMARCA4;FGFR1;JUN;PHF2;KDM1A;STAT1;RELA;MED1;SRC;DNMT3B;MYC		HDAC3;CAV1;DNMT1;GATA3;DNMT3B;STAT3;SMAD2;TP53;PHF8;JUN;SQSTM1;STAT6;RELA	CAV1;SQSTM1;RELA;TP53	SMAD2;GATA3;PHF8;STAT3;DNMT1;CAV1;HDAC3	ESR1;SIRT6;CREBBP;SHC1;SMAD2;CDKN1B;FOXO1;CTNNB1;HDAC4;KLF4;NOTCH1;KDM4A;KDM5C;STAT6	SMAD2;DNMT3B;CTBP2;DNMT1;HDAC4;SIRT6;FOXO1;PHF8;MED1;CREBBP;RELA;PIAS1;STAT6;EZH2;KLF4;STAT3;CDKN1B;RB1;CAV1;HDAC3		FOXO1;HDAC4;KDM5C;SIRT6;RELA;STAT6;CAV1;CDKN1B;CREBBP;KDM4A;CTNNB1;KLF4;NOTCH1;SMAD2		CDKN1B;FOXO1;CREBBP;STAT6;PIAS1;CAV1;DNMT1;HDAC3;CTBP2;RB1;STAT3;RELA;HDAC4;MED1;SIRT6;PHF8;SMAD2	JUN;RELA;STAT6;TP53;DNMT3B;SQSTM1	HDAC4;RELA;TP53;EHMT2;KDM4A;FOXO1;KDM1A;YAP1;CREBBP;STAT1;SMARCA4;NOTCH1;STAT6;ZEB1;RB1;KLF4;MYC;JUN;KDM5A;STAT3;ESR1;SQSTM1;DNMT1;DNMT3B;HDAC3;CTNNB1;FGFR1;PHF2;CBX3;CDKN1B;FOXK2;PIAS1	TP53;SQSTM1;CAV1;RELA	KDM1A;EHMT2;TP53;PHF2;FOXK2;HDAC3;RELA;MYC;STAT3;SRC;STAT1;JUN;SMARCE1;FGFR1;RB1;DNMT3B	HDAC4;KDM1A;TP53;CDKN1B;STAT1;HDAC3;KDM4A;CTNNB1;EHMT2;SIRT6;FOXK2;MYC;CREBBP;FGFR1;SMARCE1;JUN;STAT3;STAT6;KDM5C;NOTCH1;SHC1;SMAD2;ESR1;PHF2;RB1;DNMT3B;KLF4;FOXO1;RELA;SRC		STAT1;STAT6;TP53;SRC;FOXK2;RB1;DNMT1;DNMT3B;FGFR1;PHF2;JUN	FGFR1;EP300;HDAC4;RB1;STAT6;TP53;ZEB1;FOXK2;DNMT1;ESR1;CDKN1B;CREBBP;AR;SRC;SQSTM1;FOXO1;CAV1;HDAC1;KDM5A;MED1;GATA3;DNMT3B;PHF2;SMARCC2;TWIST1;JUN;CTNNB1;SMAD2;KLF4;STAT1;SIRT6;KDM4A;NOTCH1	DNMT3B;CTNNB1;PHF2;FOXO1;SMARCA4;HDAC4;SIRT6;KDM4A;MYC;FGFR1;EHMT2;KDM1A;CAV1;MED1;CREBBP;NOTCH1;STAT6;RELA;SRC;FOXK2;KDM5C;SMAD2;STAT1;JUN;KLF4;CDKN1B;TP53;RB1	PIAS1;DNMT3B;RB1;RELA;DNMT1;SQSTM1;FOXK2;STAT1;STAT3;JUN;STAT6;PHF2;KDM1A;CBX3;FGFR1;TP53;MYC;HDAC3;EHMT2	ESR1;SMARCC2;SMAD2;SQSTM1;CTNNB1;KDM5A;NOTCH1;GATA3;HDAC4;MED1;EP300;TWIST1;FOXO1;SIRT6;KLF4;ZEB1;HDAC1;AR;CAV1;CREBBP;KDM4A;STAT6;CDKN1B	KDM4A;NOTCH1;ESR1;FOXO1;KDM5A;HDAC4;STAT6;SMARCA4;CREBBP;KLF4;CDKN1B;CTNNB1;YAP1;ZEB1	SMAD2;MED1;EZH2;DNMT3B;KLF4	15		13	4	7	14
GO_GLIOGENESIS		7.407	3.749	5.82	7.783	9.498	5.957	5.153	7.117	2.647	7.952			6.964	8.497	2.439	6.562	5.356	2.057			EGFR;ERBB2;VIM;STAT3;MTOR;ANXA1;ERBB3;RELA	RELA;ERBB2	EGFR;ERBB3;STAT3;ERBB2	VIM;ERBB2;PTEN;MTOR;CTNNB1;NOTCH1;MAP2K1	STAT3;VIM;MTOR;EGFR;ILK;RELA;ERBB2;ERBB3;EZH2		ILK;VIM;ERBB2;RELA;MAP2K1;MTOR;EGFR;PTEN;CTNNB1;NOTCH1		ERBB3;ERBB2;EGFR;MTOR;ILK;STAT3;RELA	VIM;ANXA1;MTOR;RELA;EGFR	PHGDH;CTNNB1;VIM;RELA;STAT3;MTOR;MAP2K1;EGFR;NOTCH1;ANXA1	ERBB2;RELA	PHGDH;STAT3;RELA;ANXA1	RELA;MTOR;MAP2K1;ERBB2;PHGDH;NOTCH1;ANXA1;STAT3;PTEN;CTNNB1;VIM			ERBB3;PHGDH;VIM;MAP2K1;HDAC1;ANXA1;CTNNB1;ERBB2;MTOR;NOTCH1	ERBB2;ANXA1;CTNNB1;ILK;NOTCH1;MTOR;RELA;MAP2K1;VIM;PTEN;EGFR	PHGDH;RELA;STAT3;ANXA1	CTNNB1;MAP2K1;ERBB3;HDAC1;ERBB2;NOTCH1;MTOR;VIM	MTOR;NOTCH1;MAP2K1;VIM;CTNNB1;EGFR	EZH2;VIM			8	2	4	7
GO_RHYTHMIC_PROCESS	4.992	7.387	3.741	9.54	7.765	9.472	7.15	5.144	15.546	6.652	16.526		5.85	17.943	14.682	6.2	11.623	9.278		TP53;JUN;ATG7;MAPK8;SRC;KAT2B		EGFR;PDGFRA;HDAC3;NCOA1;PRKAA1;MTOR;TP53;JUN		EGFR;NCOA1;PDGFRA;HDAC3	NCOA1;ESR1;PDGFRA;CREBBP;PRKAA1;PTEN;PRKDC;MTOR;MAP2K6;KDM5C	NCOA1;MTOR;CREBBP;MAPK8;MAP2K6;CASP3;EGFR;EZH2;HDAC3		MAP2K6;KDM5C;PRKDC;MTOR;EGFR;CREBBP;PGR;NCOA1;PTEN;PRKAA1		CASP3;MAP2K6;EGFR;MTOR;MAPK8;HDAC3;NCOA1;CREBBP	JUN;MTOR;PRKAA1;TP53;EGFR	PRKDC;HDAC3;MAP2K6;PDGFRA;NCOA1;JUN;CBX3;EGFR;KDM5A;MTOR;CASP3;KAT2B;CREBBP;ESR1;MAPK8;TP53;ATG7		TP53;CASP3;HDAC3;MAPK8;ATG7;KAT2B;SRC;JUN	NCOA1;MTOR;ATG7;PRKDC;KDM5C;MAP2K6;KAT2B;CREBBP;TP53;ESR1;PRKAA1;JUN;HDAC3;PDGFRA;PTEN;MAPK8;CASP3;SRC		ATG7;TP53;SRC;KAT2B;MAPK8;CASP3;JUN	EP300;TP53;PRKAA1;ESR1;CREBBP;KAT2B;SRC;HDAC1;KDM5A;CASP3;PRKDC;MTOR;ATG7;TWIST1;JUN;MAP2K6;NCOA1;MAPK8;PDGFRA	PGR;NCOA1;KDM5C;MTOR;MAPK8;PRKAA1;SRC;JUN;KAT2B;MAP2K6;CREBBP;ATG7;PTEN;TP53;PRKDC;EGFR	ATG7;MAPK8;KAT2B;TP53;HDAC3;CASP3;CBX3;JUN	EP300;ESR1;PDGFRA;PRKDC;TWIST1;HDAC1;MAP2K6;KDM5A;CREBBP;PRKAA1;NCOA1;MTOR	MTOR;PDGFRA;ESR1;NCOA1;KDM5A;EGFR;CREBBP;PRKDC;MAP2K6		6		8		4	10
GO_REGULATION_OF_CELL_ACTIVATION	2.769	7.335	4.686	3.228	3.677	4.831	4.134	2.947	5.293	3.042	5.851		4.09	9.471	6.359	2.759	7.256	3.831		PIK3CA;ANXA1;PDGFRB;BAD;SRC		BAD;PDGFRA;ERBB2;CDKN1A;CAV1;SOCS1;GATA3;ATM;ANXA1;STAT6	CAV1;BAD;ERBB2	PDGFRA;GATA3;ATM;BAD;ERBB2;CAV1	PDGFRA;ERBB2;PRKDC;CTNNB1;CDKN1A;STAT6	PIK3CA;ATM;CASP3;ERBB2;STAT6;CAV1;BAD		BAD;PRKDC;STAT6;ERBB2;ATM;CDKN1A;CTNNB1;CAV1		CASP3;ERBB2;STAT6;CAV1;PIK3CA;BAD;ATM	CDKN1A;STAT6;SOCS1;ANXA1	PRKDC;CTNNB1;PDGFRA;BAD;PDGFRB;CASP3;PIK3CA;CDKN1A;ANXA1;STAT6;ZEB1	ERBB2;CAV1	PDGFRB;ANXA1;CASP3;PIK3CA;BAD;SRC	BAD;PRKDC;STAT6;PDGFRB;ERBB2;CDKN1A;ANXA1;PIK3CA;PDGFRA;CTNNB1;CASP3;SRC		ANXA1;PIK3CA;BAD;STAT6;SRC;PDGFRB;CASP3	BAD;TNFSF11;SRC;CDKN1A;PIK3CA;CASP3;CAV1;ANXA1;PRKDC;STAT6;PDGFRB;CTNNB1;ZEB1;PDGFRA;ERBB2;GATA3	CDKN1A;ERBB2;ANXA1;ATM;CTNNB1;STAT6;PDGFRB;CAV1;SRC;BAD;PRKDC;PIK3CA	PIK3CA;STAT6;PDGFRB;BAD;CASP3;ANXA1	CTNNB1;PDGFRA;ZEB1;PRKDC;CAV1;ERBB2;CDKN1A;TNFSF11;GATA3;BAD;STAT6	PDGFRA;STAT6;PRKDC;CTNNB1;CDKN1A;ZEB1		5		10	3	6	6
GO_ALPHA_BETA_T_CELL_DIFFERENTIATION		7.308	2.412	1.894	2.833	1.879	3.044	5.336	3.3	1.803	3.229		1.901	3.247	2.387	2.725	2.85	2.121				SOCS1;GATA3;STAT3;MTOR;ANXA1;STAT6		STAT3;GATA3	MTOR;STAT6	STAT6;STAT3;MTOR		STAT6;MTOR		STAT6;STAT3;MTOR	MTOR;STAT6;SOCS1;ANXA1	ANXA1;STAT6;STAT3;MTOR		STAT3;ANXA1	STAT3;MTOR;STAT6;ANXA1		STAT6;ANXA1	STAT6;GATA3;MTOR;ANXA1	STAT6;MTOR;ANXA1	STAT6;STAT3;ANXA1	STAT6;GATA3;MTOR	MTOR;STAT6				6		2	2
GO_REGULATION_OF_HEMOPOIESIS	7.338	7.297	3.209	5.78	5.351	5.733	5.932	4.442	15.143	6.491	12.38		4.819	17.272	12.06	7.022	13.479	7.89		RB1;ANXA1;FOS;JUN;STAT1;BAD;MED1;MYC;KAT2B		BAD;ERBB2;FOS;SOCS1;GATA3;STAT3;MTOR;ANXA1;JUN	FOS;BAD;ERBB2	BAD;STAT3;ERBB2;GATA3	CREBBP;ERBB2;PRKDC;ASH2L;MTOR;CTNNB1;NOTCH1;NFKBIA	MED1;STAT3;MTOR;CREBBP;NFKBIA;ERBB2;RB1;BAD		BAD;PRKDC;ERBB2;MTOR;CREBBP;CTNNB1;NOTCH1;NFKBIA		ERBB2;MTOR;RB1;MED1;STAT3;BAD;NFKBIA;CREBBP	JUN;SOCS1;ANXA1;MTOR;FOS	KAT2B;PRKDC;NFKBIA;CREBBP;YAP1;STAT1;NOTCH1;ZEB1;RB1;MYC;JUN;STAT3;CTNNB1;SETD1A;BAD;MTOR;FOS;ASH2L;ANXA1	FOS;ERBB2	FOS;ANXA1;KAT2B;BAD;MYC;STAT3;STAT1;JUN;RB1	ASH2L;BAD;MTOR;RB1;PRKDC;ERBB2;NFKBIA;KAT2B;CREBBP;STAT1;MYC;ANXA1;NOTCH1;JUN;STAT3;CTNNB1;FOS		STAT1;ANXA1;BAD;RB1;FOS;KAT2B;JUN	EP300;RB1;ZEB1;CREBBP;KAT2B;ASH2L;HDAC1;MED1;GATA3;TNFSF11;PRKDC;MTOR;BAD;JUN;NFKBIA;ANXA1;FOS;CTNNB1;STAT1;ERBB2;NOTCH1	ERBB2;ANXA1;CTNNB1;MTOR;STAT1;FOS;JUN;NFKBIA;KAT2B;BAD;MED1;CREBBP;MYC;PRKDC;RB1;NOTCH1	FOS;STAT1;KAT2B;BAD;RB1;MYC;SETD1A;STAT3;ANXA1;JUN	ASH2L;CTNNB1;NFKBIA;EP300;PRKDC;ZEB1;HDAC1;CREBBP;ERBB2;TNFSF11;NOTCH1;GATA3;BAD;MED1;MTOR	MTOR;ASH2L;NOTCH1;CREBBP;PRKDC;CTNNB1;YAP1;ZEB1;NFKBIA		9		9	3	4	8
GO_RESPONSE_TO_STARVATION	8.734	7.292		4.451	6.568	5.629	5.769	7.421	11.355	7.972	12.426		6.979	12.505	14.535	7.516	5.327	3.774		FOXK2;EHMT2;TP53;JUN;ATG7;ULK1;MAPK8;EIF4EBP1		CDKN1A;PRKAA1;RPTOR;MTOR;TP53;JUN;MAP1LC3B	RPTOR;TP53		PRKAA1;MAP1LC3A;MTOR;FOXO1;CDKN1A	MAP1LC3B;BECN1;EIF4EBP1;MTOR;MAPK8;RPTOR;FOXO1		FOXO1;MAP1LC3A;RPTOR;MTOR;CDKN1A;PRKAA1		FOXO1;RPTOR;MTOR;MAPK8;EIF4EBP1;BECN1	JUN;MTOR;MAP1LC3B;CDKN1A;PRKAA1;TP53	FOXO1;JUN;MAP1LC3A;ULK1;MTOR;RPTOR;CDKN1A;MAPK8;FOXK2;TP53;EHMT2;ATG7	TP53;RPTOR	EHMT2;TP53;FOXK2;MAPK8;ATG7;EIF4EBP1;ULK1;JUN	MTOR;EHMT2;ATG7;MAP1LC3A;FOXK2;FOXO1;ULK1;CDKN1A;TP53;EIF4EBP1;PRKAA1;JUN;MAPK8		EIF4EBP1;ATG7;FOXK2;TP53;ULK1;MAPK8;JUN	MAP1LC3A;JUN;ATG7;CDKN1A;FOXO1;ULK1;MAPK8;TP53;RPTOR;EIF4EBP1;PRKAA1;MTOR;FOXK2	CDKN1A;FOXK2;EHMT2;FOXO1;ULK1;MAPK8;MTOR;PRKAA1;EIF4EBP1;JUN;MAP1LC3A;RPTOR;ATG7;TP53	ATG7;JUN;RPTOR;ULK1;MAPK8;TP53;EHMT2;FOXK2	RPTOR;MAP1LC3A;FOXO1;CDKN1A;PRKAA1;MTOR	MTOR;CDKN1A;MAP1LC3A;FOXO1		8		7	2		5
GO_TISSUE_MIGRATION	6.052	7.269	2.64	4.629	5.329	4.563	3.69	5.075	10.265	7.74	12.359		8.162	12.443	10.611	6.095	4.289	4.128	2.03	PIK3CA;ANXA1;JUN;STAT5A;FGFR1;SRC;PTGS2		KIT;MET;GATA3;MTOR;ANXA1;JUN;ITGB1;STAT5A		MET;GATA3;KIT	MET;PTEN;MTOR;ITGB1;KLF4;NOTCH1	KLF4;PIK3CA;MTOR;KDR;KIT;ITGB1;MET		MTOR;PTEN;KLF4;MET;NOTCH1;ITGB1		MET;MTOR;PIK3CA;KDR;KIT	JUN;ANXA1;STAT5A;MTOR;ITGB1	KLF4;KDR;FGFR1;JUN;KIT;MET;MTOR;PIK3CA;STAT5A;NOTCH1;ITGB1;PTGS2;ANXA1		STAT5A;PTGS2;KDR;ANXA1;PIK3CA;SRC;JUN;KIT;FGFR1	MTOR;KLF4;MET;ITGB1;STAT5A;NOTCH1;FGFR1;PTGS2;ANXA1;PIK3CA;JUN;KDR;PTEN;KIT;SRC		ANXA1;PIK3CA;SRC;KIT;KDR;PTGS2;FGFR1;STAT5A;JUN	PTGS2;JUN;KIT;SRC;PIK3CA;ANXA1;KDR;STAT5A;KLF4;ITGB1;FGFR1;GATA3;MET;MTOR;NOTCH1	ANXA1;MET;FGFR1;MTOR;SRC;JUN;STAT5A;ITGB1;PIK3CA;KLF4;PTEN;PTGS2;NOTCH1	PIK3CA;FGFR1;KDR;STAT5A;PTGS2;ANXA1;KIT;JUN	ITGB1;NOTCH1;MET;GATA3;MTOR;KLF4	MTOR;NOTCH1;ITGB1;KLF4;MET	KLF4;ITGB1	7		8		3	6
GO_T_CELL_ACTIVATION_INVOLVED_IN_IMMUNE_RESPONSE	1.986	7.269	2.398	1.881	2.813	1.865	3.023	5.31	4.368	2.871	4.27		3.012	4.29	3.37	3.819	2.833	2.107		TP53;ANXA1		GATA3;STAT3;MTOR;ANXA1;TP53;STAT6		STAT3;GATA3	MTOR;STAT6	STAT6;STAT3;MTOR		STAT6;MTOR		STAT6;STAT3;MTOR	MTOR;STAT6;TP53;ANXA1	STAT3;MTOR;ANXA1;TP53;STAT6		TP53;STAT3;ANXA1	MTOR;STAT6;TP53;ANXA1;STAT3		STAT6;TP53;ANXA1	ANXA1;STAT6;TP53;GATA3;MTOR	TP53;STAT6;MTOR;ANXA1	STAT6;TP53;STAT3;ANXA1	STAT6;GATA3;MTOR	MTOR;STAT6		2		6		2	2
GO_POSITIVE_REGULATION_OF_CELLULAR_PROTEIN_LOCALIZATION	3.868	7.263	3.682	1.895	5.322	3.564	3.684	5.071	4.98	4.405	5.741		3.661	5.786	6.134	4.092	3.358	1.316	2.029	TP53;BAD;MAPK8;SRC;PTGS2		BAD;EGFR;ERBB2;HDAC3;PRKAA1;TP53;SQSTM1;ITGB1	SQSTM1;BAD;TP53;ERBB2	EGFR;HDAC3;BAD;ERBB2	PRKAA1;ERBB2;ITGB1	MAPK8;EGFR;ITGB1;ERBB2;YWHAZ;HDAC3;BAD		BAD;ERBB2;EGFR;ITGB1;PRKAA1		ERBB2;EGFR;MAPK8;HDAC3;BAD	PRKAA1;TP53;EGFR;SQSTM1;ITGB1	HDAC3;BAD;EGFR;SQSTM1;MAPK8;ITGB1;PTGS2;TP53	TP53;SQSTM1;ERBB2	PTGS2;TP53;HDAC3;MAPK8;BAD;SRC	BAD;ERBB2;ITGB1;TP53;PTGS2;PRKAA1;HDAC3;MAPK8;SRC		BAD;TP53;SRC;PTGS2;MAPK8	BAD;PTGS2;SRC;SQSTM1;MAPK8;TP53;ITGB1;ERBB2;PRKAA1	ERBB2;MAPK8;PRKAA1;SRC;BAD;ITGB1;TP53;PTGS2;EGFR	MAPK8;BAD;TP53;PTGS2;HDAC3;SQSTM1	ITGB1;ERBB2;PRKAA1;BAD;SQSTM1	ITGB1;EGFR	ITGB1;YWHAZ	5		8	4	4	3
GO_REGULATION_OF_CELLULAR_CATABOLIC_PROCESS	5.381	7.263	4.099	6.736	13.46	10.77	11.297	3.41	12.673	7.236	14.204		6.833	16.437	15.368	9.453	9.991	3.275	3.073	FOXK2;SMARCC1;PIK3CA;TP53;ATG7;BAD;AURKA;ULK1;MAPK8		BAD;CAV1;MET;VIM;PRKAA1;RPTOR;ATM;STAT3;MTOR;TP53;PRKAB1	RPTOR;CAV1;BAD;TP53	ATM;MET;BAD;RPTOR;STAT3;CAV1	BAX;IDH1;MET;VIM;PRKAA1;TSC2;PTEN;MTOR;FOXO1;KDM4A;SIRT6	PRKAB1;TSC2;STAT3;FOXO1;VIM;PIK3CA;PIAS1;ATM;MTOR;KDR;MAPK8;CASP3;RPTOR;MET;YWHAZ;SIRT6;CAV1;BAD		FOXO1;BAX;BAD;SIRT6;VIM;PTEN;RPTOR;CAV1;MTOR;KDM4A;ATM;IDH1;TSC2;MET;PRKAA1		CASP3;FOXO1;RPTOR;PIAS1;CAV1;MET;TSC2;MAPK8;MTOR;PIK3CA;KDR;STAT3;BAD;SIRT6;ATM	VIM;MTOR;PRKAB1;PRKAA1;TP53	VIM;SMARCC1;TP53;ATG7;KDM4A;FOXO1;ULK1;AURKA;KDR;STAT3;CASP3;RPTOR;PIK3CA;MAPK8;BAD;MET;TSC2;HK2;MTOR;FOXK2;PIAS1	TP53;CAV1;RPTOR	SMARCC1;TP53;KDR;FOXK2;CASP3;PIK3CA;MAPK8;BAD;ATG7;ULK1;STAT3;AURKA	AURKA;TP53;PRKAA1;KDM4A;PTEN;BAX;CASP3;VIM;MTOR;SIRT6;FOXK2;TSC2;STAT3;KDR;ATG7;IDH1;PIK3CA;MAPK8;BAD;MET;FOXO1;ULK1;SMARCC1		ATG7;PIK3CA;BAD;SMARCC1;FOXK2;TP53;ULK1;AURKA;KDR;MAPK8;CASP3	BAX;EP300;TP53;KDR;PRKAA1;FOXK2;TSC2;PIK3CA;FOXO1;CAV1;MET;RPTOR;CASP3;AURKA;MTOR;BAD;SMARCC1;ATG7;TWIST1;VIM;MAPK8;IDH1;SIRT6;KDM4A;ULK1	ATM;FOXO1;PRKAA1;SIRT6;KDM4A;TSC2;ATG7;MET;MTOR;CAV1;SMARCC1;RPTOR;PIK3CA;IDH1;MAPK8;AURKA;VIM;FOXK2;ULK1;BAX;BAD;PTEN;TP53	ATG7;PIAS1;HK2;PIK3CA;RPTOR;ULK1;MAPK8;SMARCC1;KDR;BAD;TP53;CASP3;STAT3;AURKA;FOXK2	EP300;RPTOR;TWIST1;TSC2;FOXO1;CAV1;KDM4A;PRKAA1;BAX;MET;BAD;SIRT6;IDH1;MTOR;VIM	KDM4A;MTOR;FOXO1;VIM;TSC2;MET	TSC2;PRKAB1;VIM;YWHAZ	9		11	4	6	11
GO_CELLULAR_RESPONSE_TO_ABIOTIC_STIMULUS	4.893	7.246	6.055	8.071	8.845	9.28	8.284	2.74	12.648	6.512	13.553		5.72	9.993	13.062	8.389	6.4	5.25		TP53;KDM1A;BAD;MAPK8;PTGS2;MYC		BAD;EGFR;CDKN1A;ATM;GATA3;TP53;CHEK1;BCL2L1	CHEK1;ATR;TP53;BAD	EGFR;GATA3;ATM;CHEK1;BAD;BCL2L1	BAX;CREBBP;ATR;CHEK2;PTEN;BAK1;CDKN1A;HDAC4;CHEK1	CHEK1;ATM;BAK1;MAPK8;CREBBP;CASP3;EGFR;CHEK2;HDAC4;BAD		CHEK2;HDAC4;BAX;BAD;EGFR;CREBBP;ATM;CDKN1A;PTEN;CHEK1		CASP3;CHEK1;CREBBP;CHEK2;EGFR;MAPK8;HDAC4;BAD;ATM	CDKN1A;EGFR;TP53	HDAC4;MYC;BAD;EGFR;KDM1A;CASP3;CHEK1;CHEK2;ATR;YAP1;CREBBP;CDKN1A;MAPK8;PTGS2;TP53	TP53;CHEK1;ATR	PTGS2;KDM1A;TP53;CASP3;MAPK8;BAD;MYC;CHEK2	ATR;BAD;CHEK2;CHEK1;BAX;HDAC4;MYC;CREBBP;PTGS2;CDKN1A;TP53;BAK1;PTEN;MAPK8;CASP3;KDM1A		CHEK1;BAD;TP53;CHEK2;PTGS2;MAPK8;CASP3	BAD;PTGS2;CREBBP;BAX;EP300;CDKN1A;CASP3;HDAC4;CHEK1;MAPK8;TP53;CHEK2;GATA3	CDKN1A;ATM;KDM1A;MAPK8;BAX;HDAC4;CHEK2;BAD;TP53;CREBBP;MYC;PTEN;CHEK1;PTGS2;EGFR	MAPK8;KDM1A;TP53;BAD;CHEK2;MYC;PTGS2;CHEK1;CASP3;ATR	EP300;CREBBP;CDKN1A;BAX;GATA3;BAD;CHEK2;HDAC4	CHEK2;HDAC4;EGFR;CREBBP;CDKN1A;YAP1		6		8	4	6	9
GO_POSITIVE_REGULATION_OF_HEMOPOIESIS	7.247	7.246	3.093		3.123	1.417	3.388	4.49	6.321	6.586	6.152		5.629	8.519	6.503	6.188	4.142			RB1;ANXA1;FOS;JUN;STAT1;BAD;MED1		BAD;FOS;SOCS1;GATA3;STAT3;ANXA1;JUN	FOS;BAD	BAD;STAT3;GATA3		RB1;MED1;STAT3;BAD		PRKDC;BAD		BAD;MED1;RB1;STAT3	JUN;FOS;ANXA1;SOCS1	PRKDC;BAD;JUN;STAT3;FOS;STAT1;ANXA1;RB1		FOS;ANXA1;BAD;STAT3;STAT1;JUN;RB1	BAD;RB1;PRKDC;STAT1;ANXA1;JUN;STAT3;FOS		STAT1;ANXA1;BAD;RB1;FOS;JUN	BAD;JUN;TNFSF11;PRKDC;RB1;ANXA1;FOS;MED1;STAT1;GATA3	ANXA1;STAT1;FOS;JUN;MED1;BAD;PRKDC;RB1	FOS;STAT1;BAD;RB1;STAT3;ANXA1;JUN	PRKDC;TNFSF11;GATA3;BAD;MED1			7		7	2	3
GO_DEVELOPMENTAL_GROWTH	8.417	7.242	2.761	8.906	8.233	9.908	6.937	4.917	14.827	7.352	16.609		5.831	17.853	19.006	6.733	11.534	7.893	3.359	PIK3CA;BRCA2;TP53;FGFR1;ANXA1;PDGFRB;AURKA;ULK1;MED1;STAT5A;ITGA4		CDKN1A;ATM;GATA3;STAT3;MTOR;SMAD2;ANXA1;TP53;ITGB1;STAT5A		ATM;SMAD2;STAT3;GATA3	ESR1;SMAD2;PRKDC;PTEN;MTOR;CDKN1B;CTNNB1;ITGB1;NOTCH1;CDKN1A;LRP6;SIRT6	SMAD2;MED1;STAT3;PIK3CA;ATM;CDKN1B;SIRT6;LRP6;MTOR;ITGB1;ILK;EZH2		ILK;SIRT6;PRKDC;CDKN1B;MTOR;ATM;CDKN1A;PTEN;CTNNB1;ITGB1;NOTCH1;LRP6;SMAD2		CDKN1B;MTOR;PIK3CA;ILK;MED1;SMAD2;STAT3;SIRT6;ATM;LRP6	ANXA1;STAT5A;MTOR;CDKN1A;TP53;ITGB1	PDGFRB;STAT5A;LRP6;TP53;PRKDC;ULK1;YAP1;AURKA;NOTCH1;ITGA4;BRCA2;STAT3;PIK3CA;ESR1;ITGB1;CTNNB1;FGFR1;MTOR;CDKN1B;CDKN1A;ANXA1		STAT5A;PDGFRB;TP53;ANXA1;BRCA2;PIK3CA;ITGA4;ULK1;STAT3;AURKA;FGFR1	AURKA;BRCA2;PDGFRB;STAT5A;ITGB1;TP53;CDKN1B;PTEN;CTNNB1;MTOR;SIRT6;PRKDC;FGFR1;STAT3;LRP6;NOTCH1;PIK3CA;SMAD2;ESR1;ITGA4;ULK1;CDKN1A;ANXA1		FGFR1;ANXA1;PIK3CA;TP53;ULK1;BRCA2;AURKA;PDGFRB;STAT5A	FGFR1;EP300;LRP6;PDGFRB;TP53;ESR1;CDKN1B;AR;PIK3CA;NOTCH1;MED1;GATA3;PRKDC;AURKA;STAT5A;MTOR;CDKN1A;ANXA1;CTNNB1;SMAD2;ITGB1;BRCA2;SIRT6;ULK1	ATM;CTNNB1;ILK;PDGFRB;ITGA4;SIRT6;ITGB1;FGFR1;PRKDC;CDKN1A;ANXA1;MTOR;MED1;PIK3CA;NOTCH1;LRP6;AURKA;BRCA2;CDKN1B;SMAD2;ULK1;STAT5A;PTEN;TP53	PIK3CA;PDGFRB;ULK1;FGFR1;STAT5A;TP53;BRCA2;STAT3;ANXA1;ITGA4;AURKA	CTNNB1;ESR1;EP300;PRKDC;LRP6;ITGB1;AR;CDKN1A;SMAD2;NOTCH1;GATA3;SIRT6;MED1;CDKN1B;MTOR	MTOR;NOTCH1;ESR1;ITGB1;PRKDC;CDKN1B;LRP6;CTNNB1;CDKN1A;YAP1	MED1;EZH2;ITGB1;SMAD2	11		10		4	12
GO_RESPONSE_TO_MECHANICAL_STIMULUS	8.596	7.176	4.25	3.289	9.138	5.525	8.36	4.451	11.132	9.166	12.193		9.604	9.653	11.458	8.715	2.183	2.665		JUN;FOS;BAD;STAT1;MAPK8;SRC;RELA;PTGS2		BAD;EGFR;KIT;FOS;JUN;CHEK1;RELA	FOS;CHEK1;RELA;BAD	EGFR;CHEK1;BAD;KIT	NFKBIA;BAK1;HDAC4;CHEK1	CHEK1;BAK1;MAPK8;NFKBIA;EGFR;KIT;RELA;HDAC4;BAD		HDAC4;BAD;RELA;EGFR;CHEK1;NFKBIA		CHEK1;KIT;EGFR;MAPK8;RELA;HDAC4;BAD;NFKBIA	RELA;JUN;EGFR;FOS	HDAC4;BAD;KIT;RELA;JUN;EGFR;NFKBIA;FOS;CHEK1;STAT1;MAPK8;PTGS2	FOS;CHEK1;RELA	PTGS2;FOS;RELA;MAPK8;BAD;SRC;JUN;KIT;STAT1	BAD;CHEK1;HDAC4;NFKBIA;PTGS2;STAT1;BAK1;MAPK8;JUN;RELA;FOS;KIT;SRC		CHEK1;STAT1;BAD;SRC;KIT;FOS;PTGS2;MAPK8;JUN	BAD;PTGS2;JUN;KIT;SRC;NFKBIA;HDAC4;CHEK1;FOS;MAPK8;STAT1	MAPK8;STAT1;FOS;RELA;SRC;JUN;NFKBIA;BAD;HDAC4;CHEK1;PTGS2;EGFR	FOS;STAT1;MAPK8;BAD;PTGS2;CHEK1;RELA;KIT;JUN	HDAC4;NFKBIA;BAD	HDAC4;EGFR;NFKBIA		8		7	4	4	4
GO_REGULATION_OF_GROWTH	3.447	7.163	3.629	4.786	5.208	6.585	5.855	4.879	8.488	2.949	7.294		2.496	6.511	9.857	3.351	4.327	5.632		PIK3CA;RB1;SMARCA4;TP53;FGFR1;STAT5A		EGFR;ERBB2;CDKN1A;SOCS1;BCL2L1;RPTOR;STAT3;MTOR;TP53;STAT5A	RPTOR;TP53;ERBB2	EGFR;RPTOR;STAT3;ERBB2;BCL2L1	SHC1;ERBB2;PRKDC;PTEN;MTOR;CDKN1B;CDKN1A;NOTCH1	STAT3;RB1;PIK3CA;CDKN1B;MTOR;EGFR;RPTOR;ERBB2;ILK		ILK;ERBB2;PRKDC;RPTOR;MTOR;CDKN1B;EGFR;CDKN1A;PTEN;NOTCH1		CDKN1B;ERBB2;RPTOR;EGFR;MTOR;PIK3CA;ILK;RB1;STAT3	SOCS1;STAT5A;MTOR;CDKN1A;TP53;EGFR	PRKDC;FGFR1;STAT3;MTOR;RPTOR;PIK3CA;CDKN1B;YAP1;STAT5A;CDKN1A;EGFR;SMARCA4;TP53;RB1;NOTCH1	TP53;ERBB2;RPTOR	STAT5A;TP53;PIK3CA;STAT3;FGFR1;RB1	MTOR;RB1;PRKDC;ERBB2;STAT5A;CDKN1A;CDKN1B;FGFR1;TP53;SHC1;PIK3CA;NOTCH1;STAT3;PTEN		PIK3CA;TP53;RB1;FGFR1;STAT5A	CDKN1B;AR;CDKN1A;PIK3CA;PRKDC;RB1;NOTCH1;TP53;STAT5A;FGFR1;ERBB2;MTOR;RPTOR	CDKN1A;ERBB2;NOTCH1;ILK;MTOR;SMARCA4;CDKN1B;STAT5A;PIK3CA;RPTOR;FGFR1;PTEN;TP53;PRKDC;RB1;EGFR	PIK3CA;RPTOR;FGFR1;STAT5A;TP53;RB1;STAT3	PRKDC;RPTOR;AR;ERBB2;CDKN1A;NOTCH1;CDKN1B;MTOR	MTOR;NOTCH1;SMARCA4;PRKDC;CDKN1B;CDKN1A;EGFR;YAP1		6		10	3	5	8
GO_TUBE_MORPHOGENESIS	6.227	7.154	6.046	15.576	13.261	15.504	10.009	2.528	17.797	7.118	22.842		6.721	24.113	21.978	7.346	18.179	11.385	5.389	PIK3CA;FGFR1;ANXA1;JUN;PDGFRB;STAT1;MED1;SRC;PTGS2;MYC		EGFR;PDGFRA;ERBB2;CAV1;MET;GATA3;STAT3;SMAD2;ANXA1;JUN;ITGB1	CAV1;ERBB2	EGFR;PDGFRA;SMAD2;GATA3;MET;STAT3;ERBB2;CAV1	BAX;MET;TSC2;ERBB2;BAK1;ITGB1;SIRT6;PDGFRA;SMAD2;PTEN;LRP6;ESR1;RET;ITGA5;NOTCH1;SHC1;JAK1;CTNNB1;KLF4	TSC2;SMAD2;KLF4;MED1;STAT3;PIK3CA;SIRT6;LRP6;KDR;BAK1;CASP3;EGFR;ITGB1;MET;ERBB2;YWHAZ;ILK;CAV1		ITGA5;SIRT6;EGFR;TSC2;PGR;ITGB1;CAV1;RET;PTEN;NOTCH1;JAK1;ILK;ERBB2;KLF4;MET;LRP6;SMAD2;BAX;CTNNB1		CASP3;ERBB2;CAV1;MET;TSC2;EGFR;PIK3CA;ILK;MED1;KDR;STAT3;SIRT6;LRP6;SMAD2	JUN;EGFR;ANXA1;ITGB1	PDGFRB;LRP6;ITGA5;YAP1;STAT1;EGFR;NOTCH1;ZEB1;KLF4;KDR;MYC;JUN;STAT3;CASP3;PIK3CA;RET;ESR1;ITGB1;CTNNB1;PDGFRA;FGFR1;MET;TSC2;HK2;ANXA1;PTGS2	ERBB2;CAV1	PTGS2;PDGFRB;KDR;ANXA1;CASP3;PIK3CA;MYC;STAT3;SRC;JUN;FGFR1;STAT1	PDGFRB;ITGB1;RET;JAK1;STAT1;PDGFRA;PTEN;CTNNB1;CASP3;BAX;SIRT6;ERBB2;MYC;FGFR1;ITGA5;TSC2;JUN;STAT3;KDR;LRP6;NOTCH1;PTGS2;SHC1;BAK1;PIK3CA;SMAD2;ESR1;KLF4;MET;ANXA1;SRC		STAT1;ANXA1;PIK3CA;SRC;CASP3;RET;KDR;PTGS2;PDGFRB;FGFR1;JUN	FGFR1;BAX;LRP6;PDGFRB;KDR;ZEB1;ESR1;AR;SRC;TSC2;PIK3CA;CAV1;ITGA5;MED1;GATA3;MET;PTGS2;CASP3;JAK1;TWIST1;JUN;ANXA1;CTNNB1;SMAD2;KLF4;ITGB1;STAT1;RET;SIRT6;PDGFRA;ERBB2;NOTCH1	ERBB2;CTNNB1;ILK;PDGFRB;SIRT6;TSC2;JAK1;ITGB1;MYC;FGFR1;ANXA1;MET;ITGA5;CAV1;MED1;PIK3CA;PGR;NOTCH1;LRP6;SRC;RET;PTGS2;EGFR;SMAD2;STAT1;BAX;JUN;KLF4;PTEN	PIK3CA;HK2;PDGFRB;STAT1;FGFR1;KDR;MYC;PTGS2;CASP3;ANXA1;STAT3;RET;JUN	ESR1;SMAD2;ITGA5;CTNNB1;JAK1;TSC2;NOTCH1;GATA3;MET;BAX;MED1;PDGFRA;LRP6;TWIST1;ITGB1;RET;SIRT6;KLF4;ZEB1;AR;CAV1;ERBB2	NOTCH1;ESR1;PDGFRA;ITGB1;EGFR;RET;KLF4;LRP6;CTNNB1;TSC2;MET;ITGA5;YAP1;ZEB1	ITGB1;SMAD2;MED1;TSC2;KLF4;BAK1;YWHAZ	10		11	2	8	19
GO_POSITIVE_REGULATION_OF_PROTEIN_LOCALIZATION_TO_MEMBRANE	3.066	7.132	3.629	1.835	6.506	4.058	4.141	5.227	5.406	2.801	4.156		2.945	5.314	5.543	3.723	3.876	2.06	2.668	BAD;TP53;MAPK8		BAD;EGFR;ERBB2;TP53;SQSTM1;ITGB1	SQSTM1;BAD;TP53;ERBB2	EGFR;BAD;ERBB2	ERBB2;ITGB1	MAPK8;EGFR;ITGB1;ERBB2;YWHAZ;BAD		ITGB1;ERBB2;BAD;EGFR		BAD;ERBB2;MAPK8;EGFR	EGFR;TP53;SQSTM1;ITGB1	BAD;EGFR;SQSTM1;MAPK8;ITGB1;TP53	TP53;SQSTM1;ERBB2	BAD;TP53;MAPK8	BAD;ERBB2;ITGB1;TP53;MAPK8		BAD;MAPK8;TP53	BAD;SQSTM1;MAPK8;TP53;ITGB1;ERBB2	ERBB2;MAPK8;BAD;ITGB1;TP53;EGFR	BAD;SQSTM1;TP53;MAPK8	ERBB2;SQSTM1;ITGB1;BAD	ITGB1;EGFR	ITGB1;YWHAZ	3		6	4	3	2
GO_CELL_CELL_ADHESION	2.916	7.132	4.998	7.574	6.903	9.499	5.858	3.358	7.804	3.748	10.966		3.376	11.072	10.011	3.372	9.802	5.79	1.327	PIK3CA;ANXA1;BAD;SRC;RELA;ITGA4		BAD;EGFR;PDGFRA;ERBB2;KIT;CAV1;SOCS1;GATA3;ANXA1;ITGB1;RELA	CAV1;RELA;BAD;ERBB2	EGFR;PDGFRA;GATA3;BAD;ERBB2;KIT;CAV1	CLDN1;PDGFRA;SHC1;JAK1;ERBB2;RET;ITGA5;CTNNB1;ITGB1;KLF4;NOTCH1;LRP6	KLF4;PIK3CA;LRP6;CASP3;EGFR;KIT;ITGB1;RELA;ERBB2;ILK;CAV1;BAD		ILK;ITGB1;BAD;ITGA5;RELA;ERBB2;CAV1;EGFR;RET;CTNNB1;KLF4;NOTCH1;LRP6;JAK1		CASP3;ERBB2;KIT;CAV1;EGFR;PIK3CA;ILK;RELA;BAD;LRP6	SOCS1;ANXA1;RELA;EGFR;ITGB1	KLF4;CTNNB1;PDGFRA;BAD;KIT;RELA;ITGA5;ITGB1;CASP3;PIK3CA;RET;LRP6;EGFR;NOTCH1;ANXA1;ITGA4	ERBB2;CAV1;RELA	ANXA1;CASP3;PIK3CA;ITGA4;RELA;BAD;SRC;KIT	CLDN1;ITGB1;RET;JAK1;PDGFRA;CTNNB1;CASP3;ERBB2;ITGA5;LRP6;NOTCH1;SHC1;PIK3CA;BAD;KLF4;ITGA4;ANXA1;RELA;KIT;SRC		ANXA1;PIK3CA;BAD;SRC;KIT;RET;CASP3	LRP6;SRC;PIK3CA;CAV1;CLDN1;ITGA5;GATA3;TNFSF11;KIT;CASP3;JAK1;BAD;ANXA1;CTNNB1;ITGB1;RET;KLF4;PDGFRA;ERBB2;NOTCH1	ERBB2;ANXA1;CTNNB1;ITGA5;ILK;LRP6;NOTCH1;CAV1;RELA;ITGA4;SRC;KLF4;BAD;JAK1;ITGB1;RET;PIK3CA;EGFR	PIK3CA;BAD;CASP3;RELA;ANXA1;ITGA4;RET;KIT	CTNNB1;PDGFRA;LRP6;JAK1;ITGB1;RET;CAV1;ERBB2;TNFSF11;NOTCH1;GATA3;CLDN1;BAD;ITGA5;KLF4	NOTCH1;PDGFRA;ITGB1;EGFR;RET;KLF4;LRP6;CTNNB1;ITGA5	KLF4;ITGB1	6		11	4	7	12
GO_CHROMOSOME_ORGANIZATION	12.541	7.116	4.439	8.418	9.549	7.321	8.725	2.978	23.986	13.049	22.024		9.569	21.011	19.21	16.22	10.449	6.894		EHMT2;SMARCC1;BRCA2;RB1;TP53;SMARCA4;ANXA1;PHF2;KDM1A;RELA;AURKA;MAPK8;MKI67;SRC;DNMT3B;MYC;KAT2B		HDAC3;NCOA1;PRKAA1;DNMT1;GATA3;ATM;DNMT3B;PHF8;ANXA1;TP53;CHEK1;RELA	CHEK1;RELA;ATR;TP53	GATA3;ATM;CHEK1;NCOA1;PHF8;DNMT1;HDAC3	NCOA1;ESR1;CREBBP;PRKAA1;ATR;PRKDC;KDM4B;ASH2L;CTNNB1;KDM4A;HDAC4;KDM5C;SIRT6;CHEK1	BECN1;CHEK1;PHF8;DNMT3B;NCOA1;NCOA3;ATM;RB1;CREBBP;MAPK8;DNMT1;RELA;HDAC4;SIRT6;EZH2;HDAC3		HDAC4;KDM5C;SIRT6;RELA;PRKDC;CREBBP;KDM4A;ATM;KDM4B;NCOA1;CHEK1;CTNNB1;PRKAA1		CHEK1;CREBBP;MAPK8;DNMT1;NCOA3;HDAC3;RB1;BECN1;RELA;PHF8;HDAC4;NCOA1;SIRT6;ATM	ANXA1;RELA;PRKAA1;TP53;DNMT3B	HDAC4;SMARCC1;RELA;CHEK1;KAT2B;TP53;EHMT2;KDM4A;PRKDC;KDM4B;KDM1A;CREBBP;AURKA;SMARCA4;RB1;MYC;KDM5A;BRCA2;CHAF1A;ESR1;MAPK8;DNMT1;DNMT3B;NCOA3;HDAC3;CTNNB1;SETD1A;NCOA1;PHF2;CBX3;MKI67;ATR;ASH2L;ANXA1	TP53;CHEK1;ATR;RELA	KDM1A;TP53;MKI67;PHF2;HDAC3;SRC;SMARCE1;NCOA3;DNMT3B;EHMT2;BRCA2;RELA;MAPK8;AURKA;SMARCC1;ANXA1;KAT2B;RB1;MYC	AURKA;ATR;BRCA2;NCOA3;CHEK1;HDAC4;KDM1A;TP53;HDAC3;PRKAA1;KDM4A;CTNNB1;NCOA1;EHMT2;SIRT6;PRKDC;MYC;CREBBP;SMARCE1;ASH2L;KDM5C;KDM4B;KAT2B;MAPK8;ESR1;MKI67;PHF2;RB1;DNMT3B;ANXA1;RELA;SMARCC1;SRC		CHEK1;ANXA1;KAT2B;SMARCC1;TP53;SRC;RB1;MKI67;CHAF1A;DNMT1;DNMT3B;BRCA2;AURKA;MAPK8;PHF2	EP300;CHEK1;HDAC4;RB1;TP53;CHAF1A;PRKAA1;MKI67;DNMT1;ESR1;CREBBP;KAT2B;SRC;ASH2L;HDAC1;KDM5A;GATA3;DNMT3B;PRKDC;AURKA;PHF2;SMARCC2;KDM4B;SMARCC1;TWIST1;NCOA1;ANXA1;CTNNB1;MAPK8;BRCA2;SIRT6;KDM4A	DNMT3B;ATM;NCOA1;CTNNB1;PHF2;SMARCA4;PRKAA1;HDAC4;SIRT6;KDM4A;MYC;PRKDC;ANXA1;EHMT2;KDM1A;KAT2B;CREBBP;SMARCC1;MAPK8;RELA;SRC;AURKA;MKI67;KDM4B;BRCA2;CHEK1;KDM5C;TP53;RB1	DNMT3B;RB1;RELA;DNMT1;ANXA1;MKI67;MAPK8;CHEK1;ATR;NCOA3;PHF2;KDM1A;SMARCC1;BRCA2;CBX3;CHAF1A;KAT2B;TP53;MYC;HDAC3;SETD1A;AURKA;EHMT2	ASH2L;ESR1;EP300;CTNNB1;PRKDC;SMARCC2;TWIST1;HDAC1;KDM5A;KDM4B;CREBBP;KDM4A;PRKAA1;GATA3;SIRT6;HDAC4;NCOA1	KDM4A;ASH2L;ESR1;NCOA1;KDM5A;HDAC4;SMARCA4;KDM4B;CREBBP;PRKDC;CTNNB1		17		12	4	7	14
GO_REGULATION_OF_LYMPHOCYTE_ACTIVATION	2.332	7.015	4.058	2.869	4.205	5.484	4.68	3.225	4.493	2.701	5.093		3.728	8.772	6.396	2.454	7.089	3.378		BAD;SRC;ANXA1;PIK3CA		BAD;ERBB2;CDKN1A;CAV1;SOCS1;GATA3;ATM;ANXA1;STAT6	CAV1;BAD;ERBB2	GATA3;ATM;BAD;ERBB2;CAV1	ERBB2;PRKDC;CTNNB1;CDKN1A;STAT6	PIK3CA;ATM;CASP3;ERBB2;STAT6;CAV1;BAD		BAD;PRKDC;STAT6;ERBB2;ATM;CDKN1A;CTNNB1;CAV1		CASP3;ERBB2;STAT6;CAV1;PIK3CA;BAD;ATM	CDKN1A;STAT6;SOCS1;ANXA1	PRKDC;CTNNB1;BAD;CASP3;PIK3CA;CDKN1A;ANXA1;STAT6;ZEB1	ERBB2;CAV1	ANXA1;CASP3;PIK3CA;BAD;SRC	BAD;PRKDC;STAT6;ERBB2;CDKN1A;ANXA1;PIK3CA;CTNNB1;CASP3;SRC		ANXA1;PIK3CA;BAD;STAT6;SRC;CASP3	BAD;TNFSF11;SRC;CDKN1A;PIK3CA;CASP3;CAV1;PRKDC;ANXA1;STAT6;CTNNB1;ZEB1;ERBB2;GATA3	CDKN1A;ERBB2;ANXA1;ATM;CTNNB1;STAT6;CAV1;SRC;BAD;PRKDC;PIK3CA	PIK3CA;STAT6;BAD;CASP3;ANXA1	CTNNB1;ZEB1;PRKDC;CAV1;ERBB2;CDKN1A;TNFSF11;GATA3;BAD;STAT6	STAT6;PRKDC;CTNNB1;CDKN1A;ZEB1		4		9	3	5	5
GO_CELL_CYCLE_ARREST	4.453	6.928	1.91	9.268	8.814	13.708	8.08	5.645	12.009	5.118	13.043		4.231	14.492	18.125	5.89	11.566	7.369		RB1;TP53;AURKA;MYC;KAT2B		CDKN1A;PRKAA1;ATM;RPTOR;MTOR;TP53;PRKAB1	RPTOR;TP53	RPTOR;ATM	BAX;PRKAA1;CHEK2;MTOR;MAP2K6;CDKN1B;CDKN1A;NOTCH1;MAP2K1	ATM;CDKN1B;MTOR;ILK;RPTOR;CHEK2;RB1;PRKAB1;MAP2K6		CHEK2;MAP2K6;ILK;BAX;RPTOR;MAP2K1;MTOR;CDKN1B;ATM;CDKN1A;NOTCH1;PRKAA1		CDKN1B;MAP2K6;RPTOR;CHEK2;MTOR;ILK;RB1;ATM	MTOR;PRKAB1;CDKN1A;PRKAA1;TP53	MAP2K6;MYC;MTOR;MAP2K1;RPTOR;CHEK2;KAT2B;CDKN1B;AURKA;CDKN1A;NOTCH1;TP53;RB1	TP53;RPTOR	TP53;KAT2B;MYC;AURKA;CHEK2;RB1	AURKA;MTOR;CHEK2;RB1;MAP2K1;MAP2K6;KAT2B;CDKN1B;MYC;CDKN1A;TP53;PRKAA1;NOTCH1;BAX		TP53;RB1;AURKA;KAT2B;CHEK2	CDKN1B;BAX;KAT2B;EP300;MAP2K6;CDKN1A;MAP2K1;AURKA;RB1;NOTCH1;TP53;CHEK2;PRKAA1;MTOR;RPTOR	CDKN1A;ATM;ILK;MTOR;PRKAA1;BAX;MAP2K1;CHEK2;KAT2B;MAP2K6;AURKA;RPTOR;MYC;CDKN1B;TP53;RB1;NOTCH1	RPTOR;KAT2B;TP53;RB1;CHEK2;MYC;AURKA	EP300;MAP2K1;RPTOR;MAP2K6;CDKN1A;PRKAA1;BAX;NOTCH1;CHEK2;CDKN1B;MTOR	MTOR;NOTCH1;CHEK2;MAP2K1;CDKN1B;CDKN1A;MAP2K6		5		7	2	2	9
GO_REPRODUCTION	4.556	6.928	5.675	11.012	8.092	11.847	7.452	2.585	14.709	5.085	15.906		4.861	17.017	15.456	4.499	12.777	10.978	1.716	SMARCC1;BRCA2;ANXA1;FOS;PDGFRB;BAD;AURKA;MED1;SRC;PTGS2		BAD;EGFR;PDGFRA;KIT;FOS;NCOA1;GATA3;ATM;STAT3;MTOR;ANXA1;ITGB1;BCL2L1		EGFR;PDGFRA;GATA3;ATM;BAD;NCOA1;STAT3;BCL2L1;KIT	NCOA1;ESR1;BAX;IDH1;PDGFRA;LRP6;ITGA5;PRKDC;PTEN;MTOR;BAK1;MAP2K6;ITGB1;CDKN1B;MAP2K1;HDAC4;NOTCH1;CTNNB1	MED1;STAT3;NCOA1;PIAS1;ATM;CDKN1B;LRP6;BAK1;MTOR;CASP3;EGFR;KIT;ITGB1;HDAC4;MAP2K6;BAD		ITGA5;CDKN1B;EGFR;PGR;NCOA1;ITGB1;MAP2K6;MTOR;PTEN;NOTCH1;BAD;PRKDC;LRP6;HDAC4;BAX;MAP2K1;ATM;IDH1;CTNNB1		CASP3;CDKN1B;MAP2K6;KIT;PIAS1;EGFR;MTOR;NCOA1;STAT3;HDAC4;BAD;MED1;ATM;LRP6	ANXA1;MTOR;EGFR;FOS;ITGB1	HDAC4;SMARCC1;PDGFRB;MAP2K1;LRP6;PRKDC;ITGA5;AURKA;EGFR;NOTCH1;KIT;KDM5A;BRCA2;STAT3;CASP3;ESR1;ITGB1;CTNNB1;PDGFRA;NCOA1;MAP2K6;BAD;MTOR;FOS;CDKN1B;ANXA1;PTGS2;PIAS1		SMARCC1;PTGS2;PDGFRB;FOS;BRCA2;ANXA1;CASP3;BAD;STAT3;SRC;AURKA;KIT	AURKA;BRCA2;PDGFRB;HDAC4;ITGB1;CDKN1B;PDGFRA;PTEN;CTNNB1;CASP3;BAX;NCOA1;MTOR;PRKDC;MAP2K6;ITGA5;STAT3;FOS;LRP6;IDH1;NOTCH1;PTGS2;BAK1;ESR1;BAD;MAP2K1;ANXA1;SMARCC1;KIT;SRC		ANXA1;BAD;SMARCC1;SRC;KIT;FOS;BRCA2;AURKA;PTGS2;PDGFRB;CASP3	BAX;LRP6;HDAC4;PDGFRB;ESR1;CDKN1B;AR;SRC;MAP2K1;KDM5A;ITGA5;MED1;GATA3;PTGS2;KIT;CASP3;PRKDC;AURKA;MTOR;BAD;SMARCC1;MAP2K6;NCOA1;ANXA1;FOS;CTNNB1;IDH1;ITGB1;BRCA2;PDGFRA;NOTCH1	ATM;CTNNB1;NCOA1;PDGFRB;HDAC4;ITGB1;PRKDC;ANXA1;ITGA5;MTOR;FOS;MED1;SMARCC1;PGR;NOTCH1;LRP6;IDH1;SRC;MAP2K1;MAP2K6;BRCA2;AURKA;CDKN1B;PTGS2;EGFR;BAX;BAD;PTEN	PIAS1;PDGFRB;FOS;SMARCC1;BAD;BRCA2;PTGS2;CASP3;ANXA1;STAT3;AURKA;KIT	ESR1;MAP2K1;NCOA1;ITGA5;CTNNB1;KDM5A;NOTCH1;GATA3;BAX;HDAC4;MED1;PDGFRA;PRKDC;LRP6;ITGB1;BAD;IDH1;MAP2K6;AR;CDKN1B;MTOR	MTOR;NOTCH1;ESR1;NCOA1;PDGFRA;KDM5A;HDAC4;ITGB1;MAP2K1;EGFR;PRKDC;CDKN1B;LRP6;CTNNB1;MAP2K6;ITGA5	MED1;ITGB1;BAK1	10		13		9	18
GO_RESPONSE_TO_TEMPERATURE_STIMULUS	1.465	6.928	1.91	7.904	5.032	9.207	5.452	5.645	7.073		7.997		1.376	9.264	9.747	2.835	8.765	4.734		FOS;PTGS2		AKT1S1;CDKN1A;FOS;PRKAA1;RPTOR;ATM;MTOR	RPTOR;FOS;ATR	RPTOR;ATM	CREBBP;PRKAA1;ATR;MTOR;FOXO1;AKT1S1;CDKN1A;NFKBIA	ATM;MTOR;CREBBP;NFKBIA;RPTOR;FOXO1		FOXO1;RPTOR;AKT1S1;MTOR;CREBBP;ATM;CDKN1A;PRKAA1;NFKBIA		FOXO1;CREBBP;RPTOR;MTOR;NFKBIA;ATM	MTOR;CDKN1A;PRKAA1;FOS;AKT1S1	FOXO1;MTOR;NFKBIA;FOS;RPTOR;ATR;CREBBP;CDKN1A;PTGS2	ATR;FOS;RPTOR		MTOR;ATR;FOXO1;NFKBIA;AKT1S1;CDKN1A;CREBBP;PTGS2;PRKAA1;FOS		PTGS2;FOS	PTGS2;CREBBP;EP300;NFKBIA;CDKN1A;FOXO1;FOS;AKT1S1;PRKAA1;MTOR;RPTOR	CDKN1A;ATM;FOXO1;MTOR;PRKAA1;FOS;NFKBIA;CREBBP;RPTOR;AKT1S1;PTGS2	RPTOR;PTGS2;ATR;FOS	NFKBIA;EP300;RPTOR;AKT1S1;FOXO1;CREBBP;CDKN1A;PRKAA1;MTOR	MTOR;FOXO1;CREBBP;CDKN1A;NFKBIA		2		7	3	2	8
GO_NEGATIVE_REGULATION_OF_CELLULAR_COMPONENT_ORGANIZATION	4.993	6.924	5.537	3.011	6.85	4.51	5.648	1.952	7.268	5.147	7.822		6.542	11.687	9.479	4.687	4.986	2.84	2.397	EIF4EBP1;TP53;KDM1A;PHF2;ULK1;SRC;DNMT3B;KAT2B		CAV1;MET;VIM;DNMT1;ATM;DNMT3B;TP53;CHEK1;BCL2L1;PHF8	CAV1;CHEK1;TP53	ATM;CHEK1;MET;PHF8;BCL2L1;DNMT1;CAV1	MET;VIM;TSC2;PTEN;NOTCH1;CHEK1	TSC2;CHEK1;EIF4EBP1;DNMT3B;PHF8;VIM;ATM;IKBKB;DNMT1;MET;CAV1		VIM;ATM;PTEN;TSC2;MET;NOTCH1;CHEK1;CAV1		CHEK1;CAV1;MET;TSC2;DNMT1;EIF4EBP1;IKBKB;PHF8;ATM	DNMT3B;TP53;VIM	IKBKB;VIM;PHF2;ULK1;KDM5A;MET;KDM1A;TSC2;CHEK1;KAT2B;DNMT3B;DNMT1;TP53;NOTCH1	TP53;CHEK1;CAV1	KDM1A;TP53;PHF2;KAT2B;EIF4EBP1;ULK1;SRC;DNMT3B;IKBKB	DNMT3B;PHF2;CHEK1;MET;ULK1;IKBKB;KDM1A;KAT2B;TP53;TSC2;EIF4EBP1;NOTCH1;PTEN;VIM;SRC		CHEK1;IKBKB;EIF4EBP1;TP53;SRC;DNMT1;DNMT3B;ULK1;KAT2B;PHF2	EP300;CHEK1;TP53;DNMT1;KAT2B;AR;SRC;TSC2;CAV1;KDM5A;DNMT3B;ULK1;EIF4EBP1;PHF2;TWIST1;VIM;MET;IKBKB;NOTCH1	DNMT3B;ATM;MET;PHF2;KDM1A;ULK1;CAV1;SRC;EIF4EBP1;VIM;KAT2B;TSC2;TP53;PTEN;CHEK1;NOTCH1	IKBKB;ULK1;DNMT3B;PHF2;KDM1A;KAT2B;TP53;CHEK1;DNMT1	EP300;TWIST1;AR;KDM5A;TSC2;CAV1;NOTCH1;MET;VIM	NOTCH1;KDM5A;VIM;TSC2;MET	TSC2;DNMT3B;VIM	8		10	3	7	6
GO_GLIAL_CELL_DIFFERENTIATION		6.906	4.108	6.569	7.442	10.587	6.683	4.322	7.045	2.117	7.967			6.906	8.468	1.95	7.412	5.985				EGFR;ERBB2;VIM;STAT3;MTOR;ERBB3;RELA	RELA;ERBB2	EGFR;ERBB3;STAT3;ERBB2	VIM;ERBB2;PTEN;MTOR;CTNNB1;NOTCH1;MAP2K1	STAT3;VIM;MTOR;EGFR;ILK;RELA;ERBB2;ERBB3		ILK;VIM;ERBB2;RELA;MAP2K1;MTOR;EGFR;PTEN;CTNNB1;NOTCH1		ERBB3;ERBB2;EGFR;MTOR;ILK;STAT3;RELA	RELA;MTOR;EGFR;VIM	PHGDH;CTNNB1;VIM;RELA;STAT3;MTOR;MAP2K1;EGFR;NOTCH1	ERBB2;RELA	PHGDH;STAT3;RELA	RELA;MTOR;MAP2K1;ERBB2;PHGDH;NOTCH1;STAT3;PTEN;CTNNB1;VIM			ERBB3;PHGDH;VIM;MAP2K1;HDAC1;CTNNB1;ERBB2;MTOR;NOTCH1	ERBB2;CTNNB1;ILK;NOTCH1;MTOR;RELA;MAP2K1;VIM;PTEN;EGFR	PHGDH;RELA;STAT3	CTNNB1;MAP2K1;ERBB3;HDAC1;ERBB2;NOTCH1;MTOR;VIM	MTOR;NOTCH1;MAP2K1;VIM;CTNNB1;EGFR				7	2	4	7
GO_LEUKOCYTE_CELL_CELL_ADHESION	4.632	6.877	3.51	2.545	6.039	5.329	4.434	3.676	5.51	5.108	7.231		3.463	8.329	7.733	3.823	6.036	2.08	1.949	PIK3CA;ANXA1;BAD;SRC;RELA;ITGA4		BAD;ERBB2;CAV1;SOCS1;GATA3;ANXA1;ITGB1;RELA	CAV1;RELA;BAD;ERBB2	BAD;CAV1;ERBB2;GATA3	ITGA5;ERBB2;ITGB1;KLF4	KLF4;PIK3CA;CASP3;ITGB1;RELA;ERBB2;CAV1;BAD		BAD;ITGA5;RELA;ERBB2;CAV1;KLF4;ITGB1		CASP3;ERBB2;CAV1;PIK3CA;RELA;BAD	RELA;SOCS1;ANXA1;ITGB1	KLF4;BAD;ITGA5;RELA;ITGB1;CASP3;PIK3CA;ANXA1;ITGA4	ERBB2;CAV1;RELA	ANXA1;CASP3;PIK3CA;ITGA4;RELA;BAD;SRC	BAD;KLF4;ERBB2;ITGA4;ITGB1;ITGA5;ANXA1;PIK3CA;RELA;CASP3;SRC		ANXA1;PIK3CA;BAD;SRC;CASP3	BAD;TNFSF11;SRC;CASP3;PIK3CA;CAV1;ANXA1;ITGA5;ITGB1;KLF4;ERBB2;GATA3	ERBB2;ANXA1;ITGA5;CAV1;SRC;ITGA4;RELA;BAD;ITGB1;KLF4;PIK3CA	PIK3CA;BAD;CASP3;RELA;ANXA1;ITGA4	ITGB1;CAV1;ERBB2;TNFSF11;GATA3;BAD;ITGA5;KLF4	KLF4;ITGB1;ITGA5	KLF4;ITGB1	6		8	4	4	4
GO_SIGNAL_TRANSDUCTION_BY_PROTEIN_PHOSPHORYLATION	3.504	6.877	5.875	10.408	11.728	11.357	9.662	2.447	11.928	6.811	17.518		4.706	16.566	14.516	5.326	12.66	7.596	2.955	FGFR1;JUN;PDGFRB;MAPK8;MED1;SRC;MYC		EGFR;PDGFRA;ERBB2;KIT;HDAC3;CAV1;MET;PRKAA1;ERBB3;JUN;IGF1R	CAV1;CHUK;ERBB2	EGFR;PDGFRA;MET;ERBB2;ERBB3;KIT;CAV1;HDAC3	MET;PDGFRA;SHC1;BRAF;JAK1;PRKAA1;ERBB2;RET;PTEN;FOXO1;MAP2K6;CTNNB1;KLF4;NOTCH1;MAP2K1	KLF4;MED1;MAP2K6;KDR;MAPK8;IKBKB;EGFR;KIT;ILK;EZH2;MET;ERBB2;YWHAZ;ERBB3;CAV1;HDAC3;FOXO1		ILK;MAP2K6;FOXO1;PRKAA1;ERBB2;MAP2K1;CAV1;EGFR;RET;PTEN;CTNNB1;KLF4;MET;NOTCH1;JAK1;BRAF		ERBB3;FOXO1;ERBB2;MAP2K6;CAV1;MET;EGFR;MAPK8;ILK;HDAC3;IKBKB;KDR;KIT;MED1	JUN;EGFR;PRKAA1;IGF1R	PDGFRB;MAP2K1;FOXO1;CHUK;EGFR;NOTCH1;KLF4;IKBKB;BRAF;KDR;MYC;JUN;KIT;RET;MAPK8;HDAC3;CTNNB1;PDGFRA;FGFR1;MAP2K6;MET	ERBB2;CHUK;CAV1	PDGFRB;KDR;CHUK;HDAC3;MAPK8;MYC;SRC;JUN;ALK;KIT;FGFR1;IKBKB	PDGFRB;BRAF;RET;JAK1;CHUK;HDAC3;PRKAA1;PDGFRA;PTEN;CTNNB1;MAP2K6;ERBB2;MYC;FGFR1;ALK;JUN;KDR;IKBKB;NOTCH1;SHC1;MAPK8;KLF4;MAP2K1;MET;FOXO1;KIT;SRC		PDGFRB;IKBKB;SRC;KIT;RET;KDR;MAPK8;FGFR1;JUN	FGFR1;PDGFRB;KDR;PRKAA1;AR;SRC;MAP2K1;FOXO1;CAV1;MED1;TNFSF11;KIT;JAK1;ERBB3;JUN;MAP2K6;BRAF;CTNNB1;MAPK8;KLF4;RET;MET;PDGFRA;ERBB2;IKBKB;NOTCH1	ERBB2;CTNNB1;ILK;FOXO1;PDGFRB;PRKAA1;BRAF;JAK1;MYC;FGFR1;MET;CAV1;MED1;NOTCH1;MAPK8;SRC;MAP2K1;MAP2K6;RET;EGFR;JUN;KLF4;PTEN	IKBKB;PDGFRB;MAPK8;FGFR1;KDR;CHUK;MYC;HDAC3;RET;KIT;JUN	CTNNB1;PDGFRA;MAP2K1;ERBB3;JAK1;MAP2K6;BRAF;AR;RET;FOXO1;CAV1;ERBB2;TNFSF11;NOTCH1;MET;PRKAA1;MED1;KLF4	NOTCH1;PDGFRA;FOXO1;MAP2K1;EGFR;RET;KLF4;BRAF;CTNNB1;MAP2K6;MET	MED1;EZH2;KLF4;YWHAZ	7		11	3	8	15
GO_RESPONSE_TO_UV	8.367	6.857	2.275	8.011	7.657	8	6.66	6.581	14.847	9.172	17.76		6.571	11.635	15.248	11.83	4.918	3.119		BRCA2;TP53;KDM1A;MAPK8;RELA;PTGS2;MYC		EGFR;CDKN1A;PRKAA1;TP53;CHEK1;RELA	CHEK1;RELA;ATR;TP53	EGFR;CHEK1	BAX;CREBBP;PRKAA1;ATR;BAK1;CDKN1A;CHEK1	CHEK1;CREBBP;MAPK8;BAK1;CASP3;EGFR;RELA		BAX;RELA;CREBBP;EGFR;CDKN1A;CHEK1;PRKAA1		CASP3;CHEK1;EGFR;MAPK8;RELA;CREBBP	CDKN1A;RELA;PRKAA1;TP53;EGFR	MYC;EGFR;RELA;BRCA2;KDM1A;CASP3;CHEK1;ATR;CREBBP;CDKN1A;MAPK8;PTGS2;TP53	TP53;CHEK1;ATR;RELA	PTGS2;KDM1A;TP53;BRCA2;CASP3;RELA;MAPK8;MYC	ATR;BRCA2;CHEK1;BAX;MYC;CREBBP;PTGS2;CDKN1A;TP53;PRKAA1;BAK1;RELA;MAPK8;CASP3;KDM1A		CHEK1;TP53;BRCA2;PTGS2;MAPK8;CASP3	PTGS2;BAX;CREBBP;EP300;CDKN1A;CASP3;CHEK1;MAPK8;TP53;BRCA2;PRKAA1	CDKN1A;KDM1A;MAPK8;PRKAA1;RELA;BAX;TP53;BRCA2;CREBBP;MYC;CHEK1;PTGS2;EGFR	MAPK8;KDM1A;MYC;BRCA2;TP53;PTGS2;CHEK1;CASP3;ATR;RELA	EP300;CREBBP;CDKN1A;PRKAA1;BAX	CDKN1A;EGFR;CREBBP		7		6	4	2	7
GO_BIOLOGICAL_ADHESION	1.997	6.854	5.626	7.102	7.142	8.745	6.478	2.558	5.723	3.078	9.61		2.872	9.709	8.26	2.687	8.794	4.21		PIK3CA;ANXA1;BAD;SRC;RELA;ITGA4		BAD;EGFR;PDGFRA;ERBB2;KIT;CAV1;SOCS1;GATA3;ATM;ANXA1;ERBB3;ITGB1;RELA	CAV1;RELA;BAD;ERBB2	EGFR;PDGFRA;GATA3;ATM;BAD;ERBB3;ERBB2;KIT;CAV1	CLDN1;PDGFRA;SHC1;JAK1;ITGB4;ERBB2;RET;ITGA5;PTEN;CTNNB1;ITGB1;KLF4;NOTCH1;LRP6	KLF4;PIK3CA;ATM;LRP6;KDR;CASP3;EGFR;KIT;ITGB1;ILK;RELA;ERBB2;ERBB3;CAV1;BAD		ILK;ITGB1;BAD;ITGA5;RELA;ERBB2;CAV1;EGFR;ATM;RET;PTEN;CTNNB1;KLF4;NOTCH1;LRP6;JAK1		CASP3;ERBB3;ERBB2;KIT;CAV1;EGFR;PIK3CA;ILK;KDR;RELA;BAD;ATM;LRP6	SOCS1;ANXA1;RELA;EGFR;ITGB1	KLF4;KDR;PDGFRA;CTNNB1;BAD;KIT;RELA;ITGA5;ITGB1;CASP3;PIK3CA;RET;LRP6;EGFR;NOTCH1;ANXA1;ITGA4	ERBB2;CAV1;RELA	KDR;ANXA1;CASP3;PIK3CA;ITGA4;RELA;BAD;SRC;KIT	CLDN1;ITGB1;RET;JAK1;PDGFRA;PTEN;CTNNB1;CASP3;ERBB2;ITGA5;KDR;LRP6;NOTCH1;SHC1;PIK3CA;BAD;KLF4;ITGA4;ITGB4;ANXA1;RELA;KIT;SRC		ANXA1;PIK3CA;BAD;SRC;KIT;RET;KDR;CASP3	LRP6;KDR;ITGB4;SRC;PIK3CA;CAV1;CLDN1;ITGA5;GATA3;TNFSF11;KIT;CASP3;JAK1;BAD;ERBB3;ANXA1;CTNNB1;ITGB1;RET;KLF4;PDGFRA;ERBB2;NOTCH1	ERBB2;ATM;CTNNB1;ILK;ITGA4;JAK1;ITGB1;ANXA1;ITGA5;CAV1;PIK3CA;NOTCH1;LRP6;RELA;SRC;RET;EGFR;BAD;KLF4;PTEN	PIK3CA;KDR;BAD;CASP3;RELA;ANXA1;ITGA4;RET;KIT	CTNNB1;PDGFRA;ITGB4;LRP6;ERBB3;JAK1;ITGB1;RET;CAV1;ERBB2;TNFSF11;NOTCH1;GATA3;CLDN1;BAD;ITGA5;KLF4	NOTCH1;PDGFRA;ITGB1;EGFR;RET;KLF4;LRP6;CTNNB1;ITGA5		6		13	4	9	14
GO_POSITIVE_REGULATION_OF_PROTEIN_KINASE_ACTIVITY	2.252	6.811	3.972	7.452	7.97	9.643	7.652	4.192	7.703	3.35	10.361		3.617	11.505	11.137	3.071	9.038	6.24		PDGFRB;FGFR1;SRC;PIK3CA		EGFR;ERBB2;KIT;CDKN1A;SOCS1;PRKAA1;RPTOR;MTOR;ERBB3	RPTOR;ERBB2	EGFR;RPTOR;ERBB3;ERBB2;KIT	SHC1;BRAF;PRKAA1;ERBB2;RET;MTOR;CDKN1B;MAP2K6;CDKN1A;MAP2K1	PIK3CA;CDKN1B;MTOR;KIT;EGFR;RPTOR;ILK;ERBB2;ERBB3;EZH2;MAP2K6		ILK;MAP2K6;ERBB2;RPTOR;MAP2K1;MTOR;CDKN1B;EGFR;CDKN1A;RET;PRKAA1;BRAF		ERBB3;CDKN1B;ERBB2;MAP2K6;RPTOR;EGFR;MTOR;PIK3CA;ILK;KIT	SOCS1;MTOR;CDKN1A;PRKAA1;EGFR	BRAF;MAP2K6;FGFR1;KIT;PDGFRB;MTOR;MAP2K1;RPTOR;PIK3CA;RET;CDKN1B;CDKN1A;EGFR	ERBB2;RPTOR	PDGFRB;PIK3CA;SRC;ALK;KIT;FGFR1	MTOR;PDGFRB;MAP2K1;MAP2K6;ERBB2;BRAF;RET;CDKN1A;CDKN1B;FGFR1;ALK;SHC1;PRKAA1;PIK3CA;KIT;SRC		PIK3CA;SRC;KIT;RET;PDGFRB;FGFR1	ERBB3;CDKN1B;TNFSF11;SRC;KIT;CDKN1A;PIK3CA;BRAF;MAP2K1;MAP2K6;ERBB2;PDGFRB;RET;FGFR1;PRKAA1;MTOR;RPTOR	CDKN1A;ERBB2;ILK;FGFR1;MTOR;PDGFRB;PRKAA1;SRC;MAP2K1;BRAF;MAP2K6;RPTOR;RET;CDKN1B;PIK3CA;EGFR	PIK3CA;RPTOR;PDGFRB;FGFR1;RET;KIT	MAP2K1;RPTOR;ERBB3;MAP2K6;BRAF;RET;ERBB2;CDKN1A;TNFSF11;PRKAA1;CDKN1B;MTOR	MTOR;MAP2K1;RET;BRAF;CDKN1B;MAP2K6;CDKN1A;EGFR		4		9	2	5	10
GO_ALPHA_BETA_T_CELL_ACTIVATION_INVOLVED_IN_IMMUNE_RESPONSE		6.811	2.758	2.265	3.386	2.258	3.586	4.405	4.066	2.184	3.994		2.281	4.018	2.951	3.285	3.399	2.502				GATA3;STAT3;MTOR;ANXA1;STAT6		STAT3;GATA3	MTOR;STAT6	STAT6;STAT3;MTOR		STAT6;MTOR		STAT6;STAT3;MTOR	MTOR;STAT6;ANXA1	ANXA1;STAT6;STAT3;MTOR		STAT3;ANXA1	STAT3;MTOR;STAT6;ANXA1		STAT6;ANXA1	STAT6;GATA3;MTOR;ANXA1	STAT6;MTOR;ANXA1	STAT6;STAT3;ANXA1	STAT6;GATA3;MTOR	MTOR;STAT6				5		2	2
GO_REGULATION_OF_CELLULAR_PROTEIN_LOCALIZATION	4.744	6.784	3.958	2.042	4.908	3.473	3.62	4.178	5.882	5.048	6.505		3.608	6.563	7.035	4.63	4.017	1.658	1.676	RB1;TP53;KDM1A;BAD;MAPK8;SRC;PTGS2		BAD;EGFR;ERBB2;HDAC3;PRKAA1;TP53;SQSTM1;ITGB1;BCL2L1	SQSTM1;BAD;TP53;ERBB2	EGFR;BAD;ERBB2;BCL2L1;HDAC3	PRKAA1;ERBB2;ITGB1;CTNNB1	MAPK8;EGFR;ITGB1;ERBB2;YWHAZ;RB1;HDAC3;BAD		BAD;ERBB2;EGFR;CTNNB1;ITGB1;PRKAA1		ERBB2;EGFR;MAPK8;HDAC3;RB1;BAD	PRKAA1;TP53;EGFR;SQSTM1;ITGB1	HDAC3;CTNNB1;BAD;EGFR;KDM1A;SQSTM1;MAPK8;ITGB1;PTGS2;TP53;RB1	TP53;SQSTM1;ERBB2	PTGS2;KDM1A;TP53;HDAC3;MAPK8;BAD;SRC;RB1	BAD;RB1;ERBB2;ITGB1;KDM1A;TP53;PTGS2;MAPK8;PRKAA1;HDAC3;CTNNB1;SRC		BAD;TP53;SRC;RB1;PTGS2;MAPK8	BAD;PTGS2;AR;SRC;SQSTM1;RB1;MAPK8;CTNNB1;TP53;ITGB1;ERBB2;PRKAA1	ERBB2;CTNNB1;KDM1A;MAPK8;PRKAA1;SRC;BAD;PTGS2;ITGB1;TP53;RB1;EGFR	MAPK8;KDM1A;TP53;RB1;BAD;PTGS2;HDAC3;SQSTM1	CTNNB1;ITGB1;AR;ERBB2;PRKAA1;BAD;SQSTM1	ITGB1;EGFR;CTNNB1	ITGB1;YWHAZ	7		9	4	5	4
GO_CELLULAR_RESPONSE_TO_IONIZING_RADIATION	2.363	6.783	4.219	3.514	2.147	3.501	2.294	2.83	6.794	3.423	5.26		2.272	3.992	5.475	4.583	3.383	3.838		TP53;KDM1A		CDKN1A;ATM;GATA3;TP53;BCL2L1	ATR;TP53	ATM;BCL2L1;GATA3	ATR;CDKN1A;CHEK2	ATM;CHEK2		ATM;CHEK2;CDKN1A		CHEK2;ATM	CDKN1A;TP53	KDM1A;CHEK2;ATR;YAP1;CDKN1A;TP53	TP53;ATR	KDM1A;CHEK2;TP53	ATR;CHEK2;CDKN1A;TP53;KDM1A		CHEK2;TP53	CHEK2;CDKN1A;GATA3;TP53	CDKN1A;ATM;KDM1A;TP53;CHEK2	CHEK2;KDM1A;ATR;TP53	CDKN1A;GATA3;CHEK2	CDKN1A;YAP1;CHEK2		2		5	2	3	3
GO_NEURON_APOPTOTIC_PROCESS	3.288	6.758	4.035	3.074	6.021	5.172	6.542	3.023	4.772	3.915	6.656		4.117	8.98	8.24	3.66	4.878	1.52		TP53;PIK3CA;JUN;RB1		AKT1S1;ATM;GATA3;ERBB3;JUN;TP53;BCL2L1		ATM;BCL2L1;ERBB3;GATA3	BAX;AKT1S1;CTNNB1;HDAC4	RB1;PIK3CA;ATM;CASP3;ILK;HDAC4;ERBB3		ILK;HDAC4;BAX;AKT1S1;ATM;CTNNB1		CASP3;ERBB3;PIK3CA;ILK;RB1;HDAC4;ATM	JUN;TP53;AKT1S1	HDAC4;CTNNB1;JUN;CASP3;PIK3CA;TP53;RB1		TP53;CASP3;PIK3CA;JUN;RB1	RB1;BAX;HDAC4;AKT1S1;TP53;PIK3CA;JUN;CTNNB1;CASP3		PIK3CA;TP53;RB1;CASP3;JUN	ERBB3;BAX;JUN;CASP3;PIK3CA;HDAC4;RB1;CTNNB1;TP53;AKT1S1;GATA3	ATM;CTNNB1;ILK;BAX;HDAC4;JUN;PIK3CA;AKT1S1;TP53;RB1	PIK3CA;TP53;RB1;CASP3;JUN	CTNNB1;ERBB3;AKT1S1;GATA3;BAX;HDAC4	HDAC4;CTNNB1		4		7		4	4
GO_CELL_CELL_SIGNALING	2.142	6.758	3.417	6.11	6.843	10.254	6.357	4.501	7.097	2.067	7.317		1.428	8.808	9.797	1.739	9.246	6.8	2.211	SMARCA4;ANXA1;BAD;FGFR1;SRC;RELA;PTGS2		BAD;EGFR;KIT;CAV1;SOCS1;PRKAA1;GATA3;STAT3;MTOR;SMAD2;ANXA1;SQSTM1;ITGB1;RELA	CAV1;SQSTM1;RELA;BAD	EGFR;SMAD2;GATA3;BAD;STAT3;KIT;CAV1	ESR1;SMAD2;PRKAA1;TSC2;GLS;PTEN;MTOR;MAP2K6;FOXO1;ITGB1;KLF4;NOTCH1;LRP6;CTNNB1	TSC2;SMAD2;KLF4;STAT3;FOXO1;LRP6;CTBP2;MTOR;EGFR;KIT;ITGB1;RELA;ILK;CAV1;MAP2K6;BAD		EGFR;TSC2;PGR;ITGB1;CAV1;PRKAA1;MAP2K6;RELA;MTOR;PTEN;NOTCH1;GLS;ILK;FOXO1;BAD;KLF4;LRP6;SMAD2;CTNNB1		FOXO1;MAP2K6;KIT;CAV1;TSC2;EGFR;MTOR;ILK;CTBP2;STAT3;RELA;BAD;LRP6;SMAD2	SOCS1;ANXA1;MTOR;RELA;PRKAA1;EGFR;SQSTM1;ITGB1	RELA;LRP6;FOXO1;YAP1;EGFR;SMARCA4;NOTCH1;KLF4;KIT;STAT3;ESR1;SQSTM1;ITGB1;CTNNB1;MAP2K6;FGFR1;BAD;TSC2;MTOR;ANXA1;PTGS2	SQSTM1;CAV1;RELA	PTGS2;ANXA1;RELA;BAD;STAT3;SRC;KIT;FGFR1	ITGB1;PRKAA1;PTEN;CTNNB1;MTOR;MAP2K6;FGFR1;TSC2;STAT3;LRP6;GLS;NOTCH1;PTGS2;SMAD2;ESR1;BAD;KLF4;FOXO1;ANXA1;RELA;KIT;SRC		ANXA1;BAD;SRC;KIT;PTGS2;FGFR1	LRP6;PRKAA1;ESR1;AR;SRC;TSC2;SQSTM1;FOXO1;CAV1;HDAC1;GATA3;PTGS2;TNFSF11;KIT;MTOR;BAD;MAP2K6;ANXA1;CTNNB1;SMAD2;ITGB1;KLF4;FGFR1;NOTCH1	CTNNB1;ILK;FOXO1;SMARCA4;PRKAA1;TSC2;ITGB1;FGFR1;ANXA1;MTOR;CAV1;PGR;NOTCH1;LRP6;GLS;SRC;RELA;MAP2K6;PTGS2;EGFR;SMAD2;BAD;KLF4;PTEN	FGFR1;BAD;PTGS2;RELA;ANXA1;SQSTM1;STAT3;KIT	ESR1;SMAD2;SQSTM1;CTNNB1;TSC2;NOTCH1;GATA3;LRP6;ITGB1;FOXO1;TNFSF11;PRKAA1;BAD;KLF4;HDAC1;MAP2K6;AR;CAV1;MTOR	MTOR;NOTCH1;ESR1;FOXO1;SMARCA4;ITGB1;EGFR;KLF4;LRP6;CTNNB1;TSC2;MAP2K6;YAP1	TSC2;KLF4;SMAD2;ITGB1	7		14	4	7	14
GO_POSITIVE_REGULATION_OF_CELL_CYCLE	9.24	6.722	4.515	5.252	11.988	8.641	11.574	3.598	11.623	9.47	12.43		11.408	16.248	18.456	8.889	6.967	4.866	1.917	BRCA2;RB1;TP53;FGFR1;ANXA1;PDGFRB;AURKA;MED1;SRC;EIF4EBP1		EGFR;RPS6KB1;CDKN1A;ATM;RPTOR;ANXA1;TP53;CHEK1	RPTOR;CHEK1;TP53	EGFR;ATM;CHEK1;RPS6KB1;RPTOR	BAX;CHEK2;RPS6KB1;CDKN1B;CDKN1A;LRP6;CHEK1	BECN1;CHEK1;MED1;EIF4EBP1;ATM;CDKN1B;LRP6;EGFR;RPTOR;CHEK2;RPS6KB1;RB1;EZH2		CHEK2;BAX;RPTOR;CDKN1B;EGFR;ATM;RPS6KB1;CDKN1A;CHEK1;LRP6		RPS6KB1;CDKN1B;CHEK1;RPTOR;CHEK2;EGFR;EIF4EBP1;RB1;BECN1;MED1;ATM;LRP6	CDKN1A;EGFR;TP53;ANXA1	FGFR1;BRCA2;PDGFRB;RPTOR;CHEK1;CHEK2;CDKN1B;LRP6;AURKA;EGFR;CDKN1A;ANXA1;RPS6KB1;TP53;RB1	TP53;CHEK1;RPTOR	PDGFRB;TP53;RPS6KB1;ANXA1;BRCA2;EIF4EBP1;SRC;AURKA;CHEK2;FGFR1;RB1	AURKA;CHEK2;RB1;BRCA2;PDGFRB;CHEK1;CDKN1A;CDKN1B;FGFR1;TP53;ANXA1;RPS6KB1;EIF4EBP1;LRP6;BAX;SRC		CHEK1;ANXA1;EIF4EBP1;TP53;SRC;RB1;RPS6KB1;BRCA2;AURKA;CHEK2;PDGFRB;FGFR1	RPS6KB1;BAX;EP300;LRP6;CHEK1;RB1;PDGFRB;TP53;CHEK2;CDKN1B;SRC;MED1;RPTOR;AURKA;EIF4EBP1;CDKN1A;ANXA1;BRCA2;FGFR1	ATM;PDGFRB;EIF4EBP1;FGFR1;CDKN1A;ANXA1;MED1;RPTOR;LRP6;SRC;AURKA;BRCA2;CHEK1;EGFR;BAX;CHEK2;RPS6KB1;CDKN1B;TP53;RB1	RPTOR;PDGFRB;FGFR1;TP53;RB1;CHEK2;BRCA2;CHEK1;RPS6KB1;ANXA1;AURKA	EP300;RPTOR;LRP6;RPS6KB1;CDKN1A;BAX;CHEK2;MED1;CDKN1B	CHEK2;CDKN1B;LRP6;RPS6KB1;CDKN1A;EGFR	MED1;EZH2	10		8	3	5	7
GO_RESPONSE_TO_ESTRADIOL	5.297	6.722	4.762	5.07	10.531	6.384	8.024	3.577	14.536	8.997	14.256		6.443	9.945	10.385	8.585	4.803	5.617	2.558	ANXA1;PDGFRB;BAD;DNMT3B;PTGS2		BAD;EGFR;NCOA1;DNMT3B;STAT3;ANXA1		EGFR;BAD;STAT3;NCOA1	NCOA1;ESR1;PTEN;CDKN1B;CTNNB1	NCOA3;DNMT3B;STAT3;NCOA1;CDKN1B;CASP3;EGFR;EZH2;BAD		BAD;CDKN1B;EGFR;NCOA1;PTEN;CTNNB1		CASP3;CDKN1B;BAD;EGFR;NCOA3;STAT3;NCOA1	EGFR;DNMT3B;ANXA1	CTNNB1;NCOA1;BAD;PDGFRB;STAT3;CASP3;CDKN1B;ESR1;EGFR;ANXA1;PTGS2;NCOA3;DNMT3B		PTGS2;PDGFRB;ANXA1;CASP3;BAD;STAT3;NCOA3;DNMT3B	NCOA1;BAD;DNMT3B;PDGFRB;NCOA3;CDKN1B;PTGS2;ANXA1;STAT3;PTEN;CTNNB1;CASP3;ESR1		ANXA1;BAD;DNMT3B;PTGS2;PDGFRB;CASP3	BAD;PTGS2;CDKN1B;DNMT3B;ESR1;CASP3;NCOA1;ANXA1;CTNNB1;PDGFRB	DNMT3B;ANXA1;CTNNB1;NCOA1;CDKN1B;PDGFRB;BAD;PTEN;PTGS2;EGFR	NCOA3;PDGFRB;DNMT3B;BAD;PTGS2;CASP3;STAT3;ANXA1	ESR1;CTNNB1;BAD;NCOA1;CDKN1B	ESR1;NCOA1;CDKN1B;CTNNB1;EGFR	EZH2;DNMT3B	5		6		4	5
GO_IN_UTERO_EMBRYONIC_DEVELOPMENT	3.565	6.708	5.711	5.239	3.049	5.182	2.54	2.56	7.22	2.34	6.996		2.52	11.334	8.565	2.13	9.281	5.991	2.917	BRCA2;TP53;FGFR1;PDGFRB;MED1		EGFR;PDGFRA;NCOA1;GATA3;SMAD2;TP53;ITGB1;BCL2L1		EGFR;PDGFRA;SMAD2;GATA3;NCOA1;BCL2L1	NCOA1;PDGFRA;SMAD2;CTNNB1;ITGB1;NOTCH1;MAP2K1	SMAD2;MED1;NCOA1;EGFR;ITGB1		MAP2K1;EGFR;NCOA1;CTNNB1;ITGB1;NOTCH1;SMAD2		NCOA1;MED1;EGFR;SMAD2	EGFR;TP53;ITGB1	CTNNB1;PDGFRA;NCOA1;FGFR1;BRCA2;PDGFRB;MAP2K1;EGFR;NOTCH1;ITGB1;TP53		PDGFRB;TP53;FGFR1;BRCA2	NCOA1;BRCA2;PDGFRB;MAP2K1;ITGB1;TP53;FGFR1;NOTCH1;SMAD2;PDGFRA;CTNNB1		PDGFRB;TP53;FGFR1;BRCA2	TWIST1;AR;MAP2K1;NCOA1;CTNNB1;SMAD2;PDGFRB;TP53;MED1;ITGB1;BRCA2;FGFR1;PDGFRA;GATA3;NOTCH1	CTNNB1;NCOA1;NOTCH1;SMAD2;PDGFRB;MAP2K1;MED1;BRCA2;ITGB1;FGFR1;TP53;EGFR	FGFR1;PDGFRB;TP53;BRCA2	CTNNB1;PDGFRA;MAP2K1;TWIST1;ITGB1;AR;SMAD2;NOTCH1;GATA3;MED1;NCOA1	NOTCH1;PDGFRA;NCOA1;ITGB1;MAP2K1;CTNNB1;EGFR	MED1;ITGB1;SMAD2	5		8		6	7
GO_RESPONSE_TO_OXYGEN_LEVELS	10.54	6.694	2.452	6.3	9.346	11.136	8.897	4.75	13.955	10.712	17.355		9.998	18.747	19.703	8.849	9.265	4.843		PDK1;EIF4EBP1;TP53;ATG7;PDGFRB;BAD;LDHA;SRC;DNMT3B;PTGS2;MYC		BAD;CDKN1A;CAV1;PRKAA1;ATM;DNMT3B;MTOR;TP53	CAV1;BAD;TP53	ATM;BAD;CAV1	CREBBP;PRKAA1;PTEN;MTOR;CDKN1B;FOXO1;CDKN1A;NOTCH1	EIF4EBP1;DNMT3B;PDK1;FOXO1;ATM;CDKN1B;MTOR;CREBBP;CASP3;CAV1;BAD		FOXO1;BAD;CAV1;CDKN1B;MTOR;CREBBP;PDK1;ATM;CDKN1A;PTEN;NOTCH1;PRKAA1		CASP3;PDK1;CDKN1B;FOXO1;CREBBP;CAV1;MTOR;EIF4EBP1;BAD;ATM	MTOR;CDKN1A;PRKAA1;TP53;DNMT3B	FOXO1;MYC;BAD;PDK1;PDGFRB;HK2;MTOR;CASP3;CDKN1B;CREBBP;CDKN1A;NOTCH1;PTGS2;TP53;ATG7;DNMT3B;LDHA	TP53;CAV1	PTGS2;PDGFRB;TP53;LDHA;CASP3;PDK1;BAD;ATG7;EIF4EBP1;MYC;SRC;DNMT3B	PDGFRB;TP53;CDKN1B;PRKAA1;LDHA;PTEN;CASP3;MTOR;MYC;CREBBP;EIF4EBP1;PDK1;ATG7;NOTCH1;PTGS2;BAD;DNMT3B;FOXO1;CDKN1A;SRC		LDHA;EIF4EBP1;ATG7;BAD;TP53;SRC;PDK1;DNMT3B;PTGS2;PDGFRB;CASP3	EP300;PDGFRB;TP53;PRKAA1;CDKN1B;CREBBP;SRC;FOXO1;CAV1;DNMT3B;PTGS2;PDK1;CASP3;EIF4EBP1;MTOR;BAD;ATG7;TWIST1;CDKN1A;LDHA;NOTCH1	DNMT3B;ATM;FOXO1;PDGFRB;PRKAA1;EIF4EBP1;PDK1;ATG7;MYC;CDKN1A;MTOR;CAV1;CREBBP;NOTCH1;SRC;CDKN1B;PTGS2;BAD;LDHA;PTEN;TP53	ATG7;PDK1;HK2;PDGFRB;LDHA;DNMT3B;BAD;TP53;MYC;PTGS2;CASP3	EP300;TWIST1;CAV1;FOXO1;CDKN1A;PRKAA1;NOTCH1;CREBBP;BAD;CDKN1B;MTOR	MTOR;NOTCH1;FOXO1;CREBBP;CDKN1B;CDKN1A		11		8	3	3	8
GO_NEGATIVE_REGULATION_OF_KINASE_ACTIVITY	2.303	6.694	2.874	5.155	8.476	8.905	9.176	4.203	6.767	2.914	7.66		3.103	8.871	10.587	3.613	5.96	3.47		RB1;DEPTOR;KAT2B		DEPTOR;AKT1S1;CDKN1A;CAV1;SOCS1;RPTOR;IGF1R	RPTOR;CAV1	RPTOR;CAV1;DEPTOR	TSC2;PTEN;AKT1S1;CDKN1B;CDKN1A;LRP6	TSC2;DEPTOR;CDKN1B;LRP6;CASP3;ILK;RPTOR;RB1;CAV1		ILK;RPTOR;AKT1S1;CDKN1B;CDKN1A;PTEN;TSC2;LRP6;CAV1		CASP3;CDKN1B;RPTOR;CAV1;TSC2;ILK;DEPTOR;RB1;LRP6	CDKN1A;IGF1R;AKT1S1;SOCS1	TSC2;CASP3;RPTOR;KAT2B;CDKN1B;LRP6;CDKN1A;DEPTOR;RB1	CAV1;RPTOR	CASP3;DEPTOR;RB1;KAT2B	RB1;DEPTOR;AKT1S1;KAT2B;CDKN1B;CDKN1A;TSC2;PTEN;CASP3;LRP6		KAT2B;RB1;CASP3;DEPTOR	DEPTOR;CDKN1B;KAT2B;CDKN1A;TSC2;LRP6;CAV1;RB1;CASP3;AKT1S1;RPTOR	CDKN1A;ILK;PTEN;LRP6;CDKN1B;DEPTOR;CAV1;KAT2B;TSC2;RPTOR;AKT1S1;RB1	RPTOR;KAT2B;RB1;CASP3;DEPTOR	RPTOR;LRP6;AKT1S1;TSC2;CAV1;CDKN1A;CDKN1B	TSC2;CDKN1A;LRP6;CDKN1B		3		7	2	3	6
GO_REGULATION_OF_HISTONE_MODIFICATION	3.989	6.675	4.733	1.687	4.762	2.671	3.855	2.287	7.349	3.659	4.844		5.023	8.519	6.283	5.769	3.599	1.907		TP53;DNMT3B;KDM1A;MAPK8		DNMT1;ATM;GATA3;DNMT3B;TP53;CHEK1	CHEK1;TP53	ATM;CHEK1;DNMT1;GATA3	CTNNB1;CHEK1	CHEK1;DNMT3B;ATM;MAPK8;DNMT1		ATM;CTNNB1;CHEK1		ATM;CHEK1;MAPK8;DNMT1	TP53;DNMT3B	CTNNB1;KDM5A;KDM1A;CHEK1;MAPK8;DNMT1;DNMT3B;TP53	TP53;CHEK1	KDM1A;TP53;DNMT3B;MAPK8	DNMT3B;CHEK1;TP53;MAPK8;CTNNB1;KDM1A		CHEK1;TP53;DNMT1;DNMT3B;MAPK8	DNMT1;DNMT3B;TWIST1;CHEK1;CTNNB1;MAPK8;KDM5A;TP53;GATA3	DNMT3B;ATM;CTNNB1;KDM1A;MAPK8;TP53;CHEK1	DNMT3B;MAPK8;KDM1A;TP53;CHEK1;DNMT1	CTNNB1;GATA3;KDM5A;TWIST1	KDM5A;CTNNB1		4		6	2	4	2
GO_NEGATIVE_REGULATION_OF_ORGANELLE_ORGANIZATION	4.489	6.672	5.688	1.687	4.818	2.418	4.277	1.579	6.201	3.985	5.098		5.227	6.998	6.425	4.569	2.259	2.002	1.905	TP53;KDM1A;PHF2;SRC;DNMT3B;KAT2B		MET;DNMT1;ATM;DNMT3B;TP53;CHEK1;BCL2L1;PHF8	CHEK1;TP53	ATM;CHEK1;MET;PHF8;BCL2L1;DNMT1	TSC2;MET;CHEK1	TSC2;CHEK1;PHF8;DNMT3B;ATM;DNMT1;MET		TSC2;ATM;MET;CHEK1		CHEK1;MET;TSC2;DNMT1;PHF8;ATM	TP53;DNMT3B	PHF2;MET;TSC2;KDM5A;KDM1A;CHEK1;KAT2B;DNMT1;DNMT3B;TP53	TP53;CHEK1	KDM1A;TP53;PHF2;KAT2B;SRC;DNMT3B	PHF2;DNMT3B;CHEK1;MET;KDM1A;KAT2B;TP53;TSC2;SRC		CHEK1;TP53;SRC;DNMT1;DNMT3B;KAT2B;PHF2	DNMT1;DNMT3B;TWIST1;KAT2B;SRC;TSC2;CHEK1;KDM5A;TP53;PHF2;MET	DNMT3B;ATM;MET;PHF2;KDM1A;SRC;KAT2B;TSC2;TP53;CHEK1	DNMT3B;PHF2;KDM1A;KAT2B;TP53;CHEK1;DNMT1	KDM5A;TSC2;MET;TWIST1	KDM5A;TSC2;MET	DNMT3B;TSC2	6		8	2	6	3
GO_RESPONSE_TO_CALCIUM_ION	2.848	6.642	3.417	1.677	2.532	4.97	2.744	4.942	3.861	2.583	3.767		2.726	4.835	6.252	2.418	3.578	1.898		FOS;BAD;JUN		BAD;EGFR;CAV1;FOS;PRKAA1;JUN	CAV1;FOS;BAD	EGFR;BAD;CAV1	BRAF;PRKAA1	EGFR;CAV1;BAD		BAD;PRKAA1;EGFR;CAV1;BRAF		BAD;CAV1;EGFR	JUN;EGFR;PRKAA1;FOS	BRAF;BAD;JUN;FOS;EGFR	FOS;CAV1	BAD;JUN;FOS	BAD;BRAF;PRKAA1;JUN;FOS		BAD;FOS;JUN	BAD;JUN;BRAF;CAV1;FOS;PRKAA1	CAV1;FOS;PRKAA1;JUN;BAD;BRAF;EGFR	FOS;BAD;JUN	PRKAA1;BRAF;BAD;CAV1	BRAF;EGFR		3		6	3	3	2
GO_POSITIVE_REGULATION_OF_HYDROLASE_ACTIVITY	3.158	6.612	5.321	4.358	7.458	4.271	5.363	2.684	6.839	4.083	8.188		2.933	6.604	6.305	3.697	4.712	3.447	3.166	JUN;PDGFRB;BAD;MAPK8;FGFR1;MYC		BAD;EGFR;PDGFRA;ERBB2;KIT;CAV1;STAT3;MTOR;JUN;ITGB1	CAV1;BAD;ERBB2	EGFR;PDGFRA;BAD;STAT3;ERBB2;KIT;CAV1	ESR1;BAX;PDGFRA;TSC2;ERBB2;MTOR;BAK1;ITGB1	TSC2;STAT3;MTOR;BAK1;MAPK8;EGFR;KIT;ITGB1;EZH2;ERBB2;CAV1;BAD		BAX;BAD;ERBB2;MTOR;EGFR;TSC2;ITGB1;CAV1		ERBB2;KIT;CAV1;TSC2;MAPK8;EGFR;MTOR;STAT3;BAD	JUN;EGFR;MTOR;ITGB1	PDGFRA;MYC;FGFR1;BAD;KIT;JUN;PDGFRB;STAT3;TSC2;MTOR;EGFR;ESR1;MAPK8;ITGB1	ERBB2;CAV1	PDGFRB;MAPK8;BAD;MYC;STAT3;JUN;KIT;FGFR1	MTOR;BAD;PDGFRB;ERBB2;ITGB1;MYC;FGFR1;TSC2;BAK1;MAPK8;JUN;STAT3;PDGFRA;BAX;KIT;ESR1		BAD;MAPK8;KIT;PDGFRB;FGFR1;JUN	BAD;ESR1;BAX;JUN;KIT;TSC2;CAV1;MAPK8;PDGFRB;ITGB1;FGFR1;PDGFRA;ERBB2;MTOR	ERBB2;MAPK8;MTOR;PDGFRB;CAV1;BAX;JUN;BAD;TSC2;ITGB1;MYC;FGFR1;EGFR	PDGFRB;MAPK8;FGFR1;MYC;BAD;STAT3;KIT;JUN	ESR1;PDGFRA;ITGB1;TSC2;CAV1;ERBB2;BAX;BAD;MTOR	MTOR;PDGFRA;ESR1;ITGB1;TSC2;EGFR	EZH2;ITGB1;BAK1;TSC2	6		10	3	7	8
GO_T_CELL_DIFFERENTIATION_INVOLVED_IN_IMMUNE_RESPONSE		6.612	2.687	2.186	3.27	2.179	3.474	4.298	3.908	2.109	3.834		2.207	3.858	2.835	3.171	3.286	2.425				GATA3;STAT3;MTOR;ANXA1;STAT6		STAT3;GATA3	MTOR;STAT6	STAT6;STAT3;MTOR		STAT6;MTOR		STAT6;STAT3;MTOR	MTOR;STAT6;ANXA1	ANXA1;STAT6;STAT3;MTOR		STAT3;ANXA1	STAT3;MTOR;STAT6;ANXA1		STAT6;ANXA1	STAT6;GATA3;MTOR;ANXA1	STAT6;MTOR;ANXA1	STAT6;STAT3;ANXA1	STAT6;GATA3;MTOR	MTOR;STAT6				5		2	2
GO_ALPHA_BETA_T_CELL_ACTIVATION		6.595	2.192	1.663	2.509	1.642	2.723	4.915	2.863	1.571	2.785		1.669	2.808	2.053	2.398	2.525	1.882				SOCS1;GATA3;STAT3;MTOR;ANXA1;STAT6		STAT3;GATA3	MTOR;STAT6	STAT6;STAT3;MTOR		STAT6;MTOR		STAT6;STAT3;MTOR	MTOR;STAT6;SOCS1;ANXA1	ANXA1;STAT6;STAT3;MTOR		STAT3;ANXA1	STAT3;MTOR;STAT6;ANXA1		STAT6;ANXA1	STAT6;GATA3;MTOR;ANXA1	STAT6;MTOR;ANXA1	STAT6;STAT3;ANXA1	STAT6;GATA3;MTOR	MTOR;STAT6				6		2	2
GO_MITOTIC_CELL_CYCLE	6.636	6.571	4.666	6.045	9.131	8.791	7.184	3.13	12.236	7.389	11.725		8.06	11.824	15.908	8.494	5.416	5.335	2.048	RB1;BRCA2;TP53;ANXA1;RRM2;PDGFRB;AURKA;MKI67;FGFR1;EIF4EBP1;MYC		EGFR;RPS6KB1;CDKN1A;ATM;RPTOR;ITGB1;ANXA1;TP53;CHEK1;BCL2L1;PHF8	RPTOR;CHEK1;TP53	EGFR;ATM;CHEK1;RPS6KB1;PHF8;RPTOR;BCL2L1	BAX;CHEK2;PRKDC;PTEN;RPS6KB1;CDKN1B;CTNNB1;CDKN1A;ITGB1;KLF4;CHEK1	BECN1;KLF4;PHF8;CHEK1;EIF4EBP1;PIAS1;ATM;CDKN1B;EGFR;RPTOR;ITGB1;CHEK2;RPS6KB1;RB1;EZH2		CHEK2;BAX;PRKDC;RPTOR;CDKN1B;EGFR;ATM;RPS6KB1;CDKN1A;PTEN;CTNNB1;KLF4;CHEK1;ITGB1		RPS6KB1;CDKN1B;CHEK1;RPTOR;PIAS1;CHEK2;EGFR;EIF4EBP1;RB1;PHF8;BECN1;ATM	ANXA1;CDKN1A;TP53;EGFR;ITGB1	PDGFRB;CHEK1;TP53;PRKDC;CHEK2;AURKA;EGFR;RB1;RRM2;KLF4;MYC;BRCA2;RPTOR;ITGB1;RPS6KB1;CTNNB1;FGFR1;MKI67;CDKN1B;CDKN1A;ANXA1;PIAS1	TP53;CHEK1;RPTOR	RRM2;PDGFRB;TP53;MKI67;BRCA2;RPS6KB1;ANXA1;EIF4EBP1;MYC;AURKA;CHEK2;FGFR1;RB1	AURKA;CHEK2;BRCA2;PDGFRB;CHEK1;ITGB1;TP53;CDKN1B;PTEN;CTNNB1;BAX;PRKDC;MYC;FGFR1;EIF4EBP1;RPS6KB1;RRM2;MKI67;RB1;KLF4;CDKN1A;ANXA1		CHEK1;ANXA1;EIF4EBP1;TP53;RB1;RPS6KB1;MKI67;RRM2;BRCA2;AURKA;CHEK2;PDGFRB;FGFR1	RPS6KB1;FGFR1;BAX;EP300;CHEK1;RB1;PDGFRB;TP53;CHEK2;MKI67;CDKN1B;RPTOR;RRM2;PRKDC;AURKA;EIF4EBP1;CDKN1A;ANXA1;CTNNB1;ITGB1;BRCA2;KLF4	ATM;CTNNB1;PDGFRB;EIF4EBP1;ITGB1;MYC;FGFR1;PRKDC;CDKN1A;ANXA1;RPS6KB1;RPTOR;AURKA;MKI67;BRCA2;CDKN1B;CHEK1;EGFR;RRM2;BAX;CHEK2;KLF4;PTEN;TP53;RB1	MKI67;PIAS1;RPTOR;PDGFRB;RRM2;FGFR1;TP53;RB1;CHEK2;BRCA2;CHEK1;MYC;RPS6KB1;ANXA1;AURKA	CTNNB1;EP300;PRKDC;RPTOR;ITGB1;RPS6KB1;CDKN1A;BAX;CHEK2;CDKN1B;KLF4	CHEK2;ITGB1;PRKDC;KLF4;CDKN1B;CTNNB1;RPS6KB1;CDKN1A;EGFR	EZH2;KLF4;ITGB1	11		11	3	7	11
GO_REGULATION_OF_HYDROLASE_ACTIVITY	4.907	6.518	4.117	3.698	6.929	3.602	4.552	3.544	8.645	6.293	9.807		5.238	9.91	7.548	4.893	5.272	3.831	3.368	TP53;ANXA1;JUN;PDGFRB;BAD;MAPK8;FGFR1;SRC;PTGS2;MYC		BAD;EGFR;PDGFRA;ERBB2;KIT;CAV1;STAT3;MTOR;TP53;ANXA1;JUN;ITGB1	CAV1;BAD;TP53;ERBB2	EGFR;PDGFRA;BAD;STAT3;ERBB2;KIT;CAV1	ESR1;BAX;PDGFRA;TSC2;ERBB2;MTOR;BAK1;ITGB1;KLF4	TSC2;KLF4;STAT3;MTOR;BAK1;MAPK8;IKBKB;EGFR;KIT;ITGB1;EZH2;ERBB2;CAV1;BAD		BAX;BAD;ERBB2;MTOR;EGFR;TSC2;ITGB1;KLF4;CAV1		ERBB2;KIT;CAV1;TSC2;MAPK8;EGFR;MTOR;IKBKB;STAT3;BAD	JUN;ANXA1;MTOR;TP53;EGFR;ITGB1	PDGFRB;TP53;EGFR;KLF4;IKBKB;MYC;JUN;KIT;KDM5A;STAT3;ESR1;MAPK8;ITGB1;PDGFRA;FGFR1;BAD;TSC2;MTOR;ANXA1;PTGS2	TP53;ERBB2;CAV1	PTGS2;PDGFRB;TP53;ANXA1;MAPK8;BAD;MYC;STAT3;SRC;JUN;KIT;FGFR1;IKBKB	PDGFRB;ITGB1;TP53;PDGFRA;BAX;MTOR;ERBB2;MYC;FGFR1;TSC2;JUN;STAT3;IKBKB;PTGS2;BAK1;MAPK8;ESR1;BAD;KLF4;ANXA1;KIT;SRC		IKBKB;ANXA1;BAD;TP53;SRC;KIT;MAPK8;PTGS2;PDGFRB;FGFR1;JUN	FGFR1;BAX;PDGFRB;TP53;ESR1;SRC;TSC2;CAV1;HDAC1;KDM5A;PTGS2;KIT;MTOR;BAD;JUN;ANXA1;MAPK8;ITGB1;KLF4;PDGFRA;ERBB2;IKBKB	ERBB2;ANXA1;MAPK8;MTOR;PDGFRB;CAV1;SRC;BAX;JUN;KLF4;BAD;TSC2;ITGB1;MYC;FGFR1;TP53;PTGS2;EGFR	IKBKB;PDGFRB;MAPK8;FGFR1;BAD;TP53;MYC;PTGS2;ANXA1;STAT3;KIT;JUN	ESR1;PDGFRA;HDAC1;ITGB1;KDM5A;TSC2;CAV1;ERBB2;BAX;BAD;MTOR;KLF4	MTOR;PDGFRA;ESR1;KDM5A;ITGB1;KLF4;TSC2;EGFR	ITGB1;EZH2;TSC2;KLF4;BAK1	10		12	4	7	9
GO_POSITIVE_REGULATION_OF_EPITHELIAL_CELL_MIGRATION	6.461	6.496	2.167	1.634	2.467	1.614	2.682	4.859	7.117	7.299	8.182		7.6	9.562	7.331	5.601	2.483	1.852		ANXA1;JUN;SRC;FGFR1;STAT5A;PTGS2		MET;GATA3;MTOR;ANXA1;JUN;STAT5A		MET;GATA3	MTOR;MET	MET;MTOR;KDR		MET;MTOR		MET;MTOR;KDR	JUN;MTOR;ANXA1;STAT5A	KDR;FGFR1;JUN;MET;MTOR;STAT5A;ANXA1;PTGS2		STAT5A;PTGS2;KDR;ANXA1;SRC;JUN;FGFR1	MTOR;MET;STAT5A;FGFR1;PTGS2;ANXA1;JUN;KDR;SRC		ANXA1;SRC;KDR;PTGS2;FGFR1;STAT5A;JUN	PTGS2;JUN;SRC;ANXA1;STAT5A;KDR;FGFR1;GATA3;MET;MTOR	ANXA1;MET;MTOR;SRC;JUN;STAT5A;FGFR1;PTGS2	FGFR1;KDR;STAT5A;PTGS2;ANXA1;JUN	GATA3;MET;MTOR	MTOR;MET		6		6		2	2
GO_CENTRAL_NERVOUS_SYSTEM_DEVELOPMENT	3.268	6.461	4.601	7.799	8.976	9.645	6.151	3.087	9.291	4.742	12.421		3.013	10.707	11.607	2.965	8.868	7.187	3.658	BRCA2;TP53;FGFR1;KDM1A;BAD;MED1;SRC		BAD;EGFR;ERBB2;NCOA1;VIM;ATM;STAT3;MTOR;TP53;ITGB1;PHF8	BAD;TP53;ERBB2	EGFR;ATM;BAD;PHF8;NCOA1;STAT3;ERBB2	NCOA1;BAX;VIM;ERBB2;PRKDC;PTEN;MTOR;BAK1;CTNNB1;ITGB1;NOTCH1;MAP2K1;LRP6	MED1;STAT3;NCOA1;PHF8;VIM;ATM;LRP6;BAK1;MTOR;CASP3;EGFR;ITGB1;ERBB2;EZH2;BAD		BAX;BAD;VIM;PRKDC;ERBB2;MAP2K1;MTOR;EGFR;ATM;NCOA1;PTEN;CTNNB1;ITGB1;NOTCH1;LRP6		CASP3;ERBB2;BAD;EGFR;MTOR;STAT3;PHF8;NCOA1;MED1;ATM;LRP6	VIM;MTOR;TP53;EGFR;ITGB1	VIM;MAP2K1;LRP6;TP53;PRKDC;KDM1A;EGFR;NOTCH1;ZEB1;PHGDH;BRCA2;STAT3;CASP3;ITGB1;CTNNB1;FGFR1;NCOA1;BAD;MTOR	TP53;ERBB2	KDM1A;TP53;BRCA2;CASP3;BAD;PHGDH;STAT3;SRC;ALK;FGFR1	BRCA2;ITGB1;TP53;PTEN;CTNNB1;VIM;BAX;NCOA1;MTOR;CASP3;PRKDC;SRC;ERBB2;FGFR1;ALK;STAT3;LRP6;PHGDH;NOTCH1;BAK1;BAD;MAP2K1;KDM1A		BAD;TP53;SRC;PHGDH;BRCA2;FGFR1;CASP3	BAX;PHGDH;LRP6;TP53;ZEB1;SRC;MAP2K1;HDAC1;MED1;CASP3;PRKDC;MTOR;BAD;VIM;NCOA1;CTNNB1;ITGB1;BRCA2;FGFR1;ERBB2;NOTCH1	ERBB2;ATM;CTNNB1;NCOA1;ITGB1;FGFR1;PRKDC;KDM1A;MTOR;MED1;NOTCH1;LRP6;SRC;MAP2K1;BRCA2;VIM;EGFR;BAX;BAD;PTEN;TP53	FGFR1;KDM1A;TP53;BAD;BRCA2;PHGDH;CASP3;STAT3	CTNNB1;ZEB1;MAP2K1;PRKDC;LRP6;HDAC1;ITGB1;ERBB2;BAX;NOTCH1;BAD;MED1;NCOA1;MTOR;VIM	MTOR;NOTCH1;NCOA1;ITGB1;MAP2K1;PRKDC;VIM;LRP6;CTNNB1;EGFR;ZEB1	ITGB1;MED1;EZH2;BAK1;VIM	7		11	3	7	13
GO_T_CELL_LINEAGE_COMMITMENT		6.461		4.449	4.298	4.429	4.493	5.272	7.045	2.774	6.95		2.872	5.285	5.433	4.18	4.301	4.763				STAT3;TP53;MTOR;STAT6			MTOR;STAT6;PRKDC	STAT6;STAT3;MTOR		PRKDC;STAT6;MTOR		STAT6;STAT3;MTOR	MTOR;STAT6;TP53	PRKDC;STAT3;MTOR;TP53;STAT6		TP53;STAT3	MTOR;PRKDC;STAT6;TP53;STAT3		STAT6;TP53	STAT6;TP53;MTOR;PRKDC	STAT6;MTOR;TP53;PRKDC	STAT3;STAT6;TP53	STAT6;MTOR;PRKDC	MTOR;STAT6;PRKDC				4			3
GO_CELLULAR_RESPONSE_TO_GAMMA_RADIATION	2.948	6.461	3.323	4.449	2.737	4.429	2.885	3.404	8.834	4.341	6.95		2.872	3.74	7.186	5.837	2.762	4.763		TP53;KDM1A		CDKN1A;TP53;BCL2L1;ATM	ATR;TP53	ATM;BCL2L1	ATR;CDKN1A;CHEK2	ATM;CHEK2		ATM;CHEK2;CDKN1A		CHEK2;ATM	CDKN1A;TP53	KDM1A;CHEK2;ATR;YAP1;CDKN1A;TP53	TP53;ATR	KDM1A;CHEK2;TP53	ATR;CHEK2;CDKN1A;TP53;KDM1A		CHEK2;TP53	CHEK2;CDKN1A;TP53	CDKN1A;ATM;KDM1A;TP53;CHEK2	CHEK2;KDM1A;ATR;TP53	CDKN1A;CHEK2	CDKN1A;YAP1;CHEK2		2		4	2	2	3
GO_POSITIVE_REGULATION_OF_LEUKOCYTE_DIFFERENTIATION	5.067	6.437	2.15		1.496	1.594	1.644	4.817	4.736	4.664	4.614		4.854	6.921	4.869	4.395	3.453			RB1;ANXA1;FOS;JUN;BAD		BAD;FOS;SOCS1;GATA3;ANXA1;JUN	FOS;BAD	BAD;GATA3		RB1;BAD		PRKDC;BAD		BAD;RB1	JUN;FOS;ANXA1;SOCS1	PRKDC;BAD;JUN;FOS;ANXA1;RB1		FOS;ANXA1;BAD;JUN;RB1	BAD;RB1;PRKDC;ANXA1;JUN;FOS		ANXA1;BAD;RB1;FOS;JUN	BAD;JUN;TNFSF11;PRKDC;RB1;ANXA1;FOS;GATA3	ANXA1;FOS;JUN;BAD;PRKDC;RB1	FOS;BAD;RB1;ANXA1;JUN	TNFSF11;GATA3;PRKDC;BAD			5		6	2	2
GO_CELL_FATE_COMMITMENT	1.32	6.423	2.776	7.306	5.696	7.246	3.934	4.055	8.585	2.775	9.521		2.965	10.787	7.733	3.438	9.353	6.853	3.196	FGFR1;TP53		GATA3;STAT3;MTOR;SMAD2;TP53;ITGB1;STAT6		SMAD2;STAT3;GATA3	SMAD2;PRKDC;MTOR;CTNNB1;ITGB1;KLF4;NOTCH1;STAT6	SMAD2;KLF4;STAT3;MTOR;CASP3;ITGB1;STAT6		PRKDC;STAT6;MTOR;SMAD2;CTNNB1;KLF4;NOTCH1;ITGB1		CASP3;STAT6;MTOR;STAT3;SMAD2	MTOR;STAT6;TP53;ITGB1	PRKDC;KLF4;CTNNB1;FGFR1;STAT3;MTOR;CASP3;NOTCH1;ITGB1;TP53;STAT6		CASP3;TP53;FGFR1;STAT3	MTOR;PRKDC;STAT6;KLF4;ITGB1;TP53;FGFR1;NOTCH1;SMAD2;STAT3;CTNNB1;CASP3		FGFR1;TP53;STAT6;CASP3	FGFR1;AR;CASP3;PRKDC;CTNNB1;STAT6;TP53;SMAD2;ITGB1;KLF4;GATA3;MTOR;NOTCH1	CTNNB1;FGFR1;SMAD2;STAT6;MTOR;ITGB1;KLF4;TP53;PRKDC;NOTCH1	STAT6;FGFR1;TP53;CASP3;STAT3	CTNNB1;PRKDC;ITGB1;AR;SMAD2;GATA3;NOTCH1;STAT6;MTOR;KLF4	MTOR;NOTCH1;ITGB1;STAT6;PRKDC;KLF4;CTNNB1	KLF4;SMAD2;ITGB1	2		7		3	8
GO_AMEBOIDAL_TYPE_CELL_MIGRATION	6.422	6.42	2.361	4.994	5.598	5.974	4.107	4.59	11.011	7.906	12.948		8.384	13.046	12.593	7.333	5.573	4.638	1.848	PIK3CA;ANXA1;JUN;STAT5A;FGFR1;SRC;PTGS2;ITGA4		KIT;MET;GATA3;MTOR;ANXA1;JUN;ITGB1;STAT5A		MET;GATA3;KIT	MET;RET;PTEN;MTOR;ITGB1;KLF4;NOTCH1	KLF4;PIK3CA;MTOR;KDR;KIT;ITGB1;MET;ILK		ILK;MTOR;RET;PTEN;KLF4;MET;NOTCH1;ITGB1		MET;MTOR;PIK3CA;ILK;KDR;KIT	JUN;ANXA1;STAT5A;MTOR;ITGB1	KLF4;KDR;FGFR1;JUN;KIT;MET;ITGB1;MTOR;PIK3CA;RET;STAT5A;NOTCH1;ANXA1;PTGS2;ITGA4		STAT5A;PTGS2;KDR;ANXA1;PIK3CA;ITGA4;SRC;JUN;KIT;FGFR1	MTOR;KLF4;MET;ITGA4;RET;STAT5A;ITGB1;NOTCH1;FGFR1;PTGS2;ANXA1;PIK3CA;JUN;KDR;PTEN;KIT;SRC		ANXA1;PIK3CA;SRC;KIT;RET;KDR;PTGS2;FGFR1;STAT5A;JUN	PTGS2;JUN;TWIST1;SRC;KIT;PIK3CA;ANXA1;KDR;STAT5A;KLF4;RET;FGFR1;ITGB1;GATA3;MET;MTOR;NOTCH1	ANXA1;MET;ILK;FGFR1;MTOR;SRC;ITGA4;JUN;RET;STAT5A;ITGB1;PIK3CA;KLF4;PTEN;PTGS2;NOTCH1	PIK3CA;FGFR1;KDR;STAT5A;PTGS2;ANXA1;ITGA4;RET;KIT;JUN	TWIST1;ITGB1;RET;NOTCH1;MET;GATA3;MTOR;KLF4	MTOR;NOTCH1;ITGB1;RET;KLF4;MET	KLF4;ITGB1	8		8		3	7
GO_REGULATION_OF_RESPONSE_TO_EXTERNAL_STIMULUS	4.725	6.418	4.57	6.8	8.907	8.594	9.028	3.068	12.859	6.307	13.269		4.345	14.378	12.482	5.668	9.789	7.141		RB1;FGFR1;ANXA1;PDGFRB;STAT1;MED1;SRC;RELA;PTGS2		EGFR;PDGFRA;CAV1;SOCS1;MET;GATA3;ATM;STAT3;MTOR;ANXA1;RELA	CAV1;RELA;CHUK	EGFR;PDGFRA;GATA3;ATM;MET;STAT3;CAV1	ESR1;MET;CREBBP;PDGFRA;JAK1;PTEN;PRKDC;MTOR;KLF4;NOTCH1;MAP2K1;NFKBIA	KLF4;MED1;STAT3;PIAS1;ATM;MTOR;CREBBP;NFKBIA;IKBKB;KDR;EGFR;RELA;MET;RB1;CAV1		RELA;PRKDC;MAP2K1;CAV1;MTOR;EGFR;CREBBP;ATM;PTEN;KLF4;MET;NOTCH1;JAK1;NFKBIA		CREBBP;PIAS1;CAV1;MET;EGFR;MTOR;RB1;KDR;STAT3;RELA;IKBKB;MED1;NFKBIA;ATM	SOCS1;ANXA1;MTOR;RELA;EGFR	RELA;PDGFRB;MAP2K1;PRKDC;CHUK;NFKBIA;CREBBP;STAT1;EGFR;NOTCH1;RB1;KLF4;IKBKB;KDR;STAT3;ESR1;PDGFRA;FGFR1;MET;MTOR;ANXA1;PTGS2;PIAS1	CAV1;CHUK;RELA	PTGS2;PDGFRB;KDR;ANXA1;CHUK;RELA;STAT3;SRC;FGFR1;STAT1;RB1;IKBKB	PDGFRB;NFKBIA;JAK1;CHUK;STAT1;PDGFRA;PTEN;MTOR;PRKDC;CREBBP;FGFR1;STAT3;KDR;IKBKB;NOTCH1;PTGS2;ESR1;RB1;KLF4;MAP2K1;MET;ANXA1;RELA;SRC		IKBKB;STAT1;ANXA1;SRC;RB1;KDR;PTGS2;PDGFRB;FGFR1	FGFR1;EP300;RB1;PDGFRB;KDR;ESR1;CREBBP;SRC;MAP2K1;CAV1;MED1;GATA3;PTGS2;TNFSF11;JAK1;PRKDC;MTOR;NFKBIA;ANXA1;KLF4;STAT1;MET;PDGFRA;IKBKB;NOTCH1	ATM;PDGFRB;JAK1;FGFR1;PRKDC;ANXA1;MET;MTOR;CAV1;MED1;CREBBP;NOTCH1;RELA;MAP2K1;SRC;PTGS2;EGFR;STAT1;NFKBIA;KLF4;PTEN;RB1	PIAS1;IKBKB;PDGFRB;STAT1;FGFR1;KDR;CHUK;RB1;PTGS2;RELA;ANXA1;STAT3	ESR1;PDGFRA;MAP2K1;EP300;NFKBIA;PRKDC;JAK1;CAV1;CREBBP;TNFSF11;GATA3;NOTCH1;MET;MED1;MTOR;KLF4	MTOR;NOTCH1;ESR1;PDGFRA;MAP2K1;CREBBP;PRKDC;KLF4;EGFR;MET;NFKBIA		9		11	3	7	12
GO_REGULATION_OF_CELLULAR_AMIDE_METABOLIC_PROCESS	2.537	6.38	2.345	3.985	6.601	5.932	6.149	4.564	4.972	4.7	7.493		3.181	5.686	6.07	3.481	3.674	2.75		TP53;PDK1;EIF4EBP1;RELA		RPS6KB1;ERBB2;VIM;PRKAA1;STAT3;MTOR;TP53;RELA	RELA;TP53;ERBB2	RPS6KB1;ERBB2;STAT3	VIM;PRKAA1;ERBB2;PRKDC;RPS6KB1;MTOR	EIF4EBP1;STAT3;PDK1;VIM;MTOR;CASP3;RELA;ERBB2;RPS6KB1		VIM;RELA;PRKDC;ERBB2;MTOR;PDK1;RPS6KB1;PRKAA1		RPS6KB1;CASP3;PDK1;ERBB2;MTOR;EIF4EBP1;STAT3;RELA	VIM;MTOR;RELA;PRKAA1;TP53	PRKDC;VIM;PDK1;RELA;STAT3;MTOR;CASP3;RPS6KB1;TP53	TP53;ERBB2;RELA	TP53;RPS6KB1;CASP3;PDK1;RELA;EIF4EBP1;STAT3	RELA;MTOR;PRKDC;ERBB2;TP53;CASP3;EIF4EBP1;RPS6KB1;PRKAA1;STAT3;PDK1;VIM		EIF4EBP1;TP53;RPS6KB1;PDK1;CASP3	RPS6KB1;PDK1;VIM;CASP3;PRKDC;TP53;EIF4EBP1;ERBB2;MTOR;PRKAA1	ERBB2;MTOR;PRKAA1;RELA;EIF4EBP1;PDK1;RPS6KB1;VIM;TP53;PRKDC	PDK1;RPS6KB1;TP53;CASP3;RELA;STAT3	PRKDC;RPS6KB1;ERBB2;PRKAA1;MTOR;VIM	MTOR;RPS6KB1;VIM;PRKDC		4		8	3	3	6
GO_POSITIVE_REGULATION_OF_CELL_ADHESION	4.284	6.38	4.326	2.326	5.556	7.013	6.149	2.453	4.149	4.7	6.537		4.029	7.55	9.107	4.34	5.53			PIK3CA;ANXA1;BAD;SRC;RELA;ITGA4		BAD;ERBB2;CAV1;SOCS1;GATA3;ATM;ANXA1;RELA	CAV1;RELA;BAD;ERBB2	GATA3;ATM;BAD;ERBB2;CAV1	JAK1;RET;ERBB2;ITGA5	PIK3CA;ATM;KDR;RELA;ERBB2;ILK;CAV1;BAD		ILK;BAD;ITGA5;JAK1;ERBB2;RELA;ATM;RET;CAV1		ERBB2;CAV1;PIK3CA;ILK;KDR;RELA;BAD;ATM	RELA;SOCS1;ANXA1	KDR;BAD;ITGA5;RELA;RET;PIK3CA;ANXA1;ITGA4	ERBB2;CAV1;RELA	KDR;ANXA1;PIK3CA;ITGA4;RELA;BAD;SRC	BAD;ERBB2;ITGA4;RET;KDR;JAK1;ITGA5;ANXA1;PIK3CA;RELA;SRC		ANXA1;PIK3CA;BAD;SRC;RET;KDR	BAD;TNFSF11;SRC;JAK1;PIK3CA;CAV1;ANXA1;KDR;ITGA5;RET;ERBB2;GATA3	ERBB2;ANXA1;ATM;ITGA5;ILK;CAV1;RELA;ITGA4;SRC;BAD;JAK1;RET;PIK3CA	PIK3CA;KDR;BAD;RELA;ANXA1;ITGA4;RET	JAK1;RET;CAV1;ERBB2;TNFSF11;GATA3;BAD;ITGA5			6		8	4	5	4
GO_ENDOTHELIAL_CELL_PROLIFERATION	5.018	6.38	3.304	1.595	5.755	3.584	6.2	3.413	8.195	7.162	7.997		4.809	8.072	8.458	8.127	3.419			JUN;STAT1;FGFR1;STAT5A;ITGA4		CAV1;RPTOR;STAT3;MTOR;JUN;STAT5A	RPTOR;CAV1	RPTOR;STAT3;CAV1	MTOR;SIRT6	STAT3;MTOR;KDR;RPTOR;SIRT6;CAV1		SIRT6;RPTOR;MTOR;CAV1		RPTOR;CAV1;MTOR;KDR;STAT3;SIRT6	JUN;MTOR;STAT5A	KDR;FGFR1;JUN;STAT3;MTOR;RPTOR;STAT5A;STAT1;ITGA4	CAV1;RPTOR	STAT5A;KDR;ITGA4;STAT3;JUN;FGFR1;STAT1	MTOR;SIRT6;ITGA4;STAT5A;KDR;FGFR1;STAT1;JUN;STAT3		STAT1;KDR;FGFR1;STAT5A;JUN	FGFR1;JUN;CAV1;STAT5A;KDR;STAT1;SIRT6;MTOR;RPTOR	MTOR;STAT1;CAV1;ITGA4;SIRT6;JUN;STAT5A;RPTOR;FGFR1	RPTOR;STAT1;FGFR1;KDR;STAT5A;STAT3;ITGA4;JUN	SIRT6;MTOR;RPTOR;CAV1			5		6	2	3	2
GO_EMBRYO_DEVELOPMENT	2.563	6.374	6.6	10.749	7.863	10.566	6.963	1.533	15.748	3.938	14.143		5.092	21.623	12.384	4.879	17.705	12.766	3.637	BRCA2;TP53;FGFR1;PDGFRB;MED1;ITGA4		EGFR;PDGFRA;KIT;NCOA1;DNMT1;GATA3;ATM;SMAD2;TP53;ITGB1;BCL2L1		EGFR;PDGFRA;GATA3;SMAD2;ATM;NCOA1;BCL2L1;KIT;DNMT1	NCOA1;BAX;CREBBP;PDGFRA;LRP6;SMAD2;ITGB4;TSC2;RET;ITGA5;PRKDC;CTNNB1;ITGB1;KLF4;MAP2K1;NOTCH1	TSC2;SMAD2;KLF4;MED1;NCOA1;ATM;LRP6;CREBBP;KDR;CASP3;EGFR;DNMT1;ITGB1;KIT		BAX;ITGA5;PRKDC;MAP2K1;CREBBP;EGFR;ATM;TSC2;NCOA1;RET;CTNNB1;ITGB1;KLF4;NOTCH1;LRP6;SMAD2		CASP3;CREBBP;KIT;EGFR;TSC2;DNMT1;KDR;NCOA1;MED1;ATM;LRP6;SMAD2	EGFR;TP53;ITGB1	PDGFRB;MAP2K1;LRP6;TP53;PRKDC;ITGA5;YAP1;CREBBP;EGFR;NOTCH1;ZEB1;ITGA4;PHGDH;KLF4;KDR;KIT;BRCA2;CASP3;RET;DNMT1;ITGB1;CTNNB1;PDGFRA;FGFR1;NCOA1;TSC2		PDGFRB;TP53;KDR;BRCA2;CASP3;ITGA4;PHGDH;KIT;FGFR1	BRCA2;PDGFRB;RET;ITGB1;TP53;PDGFRA;CTNNB1;CASP3;BAX;NCOA1;PRKDC;CREBBP;FGFR1;ITGA5;TSC2;KDR;LRP6;PHGDH;NOTCH1;SMAD2;KLF4;MAP2K1;ITGA4;ITGB4;KIT		FGFR1;TP53;KIT;PHGDH;DNMT1;BRCA2;KDR;RET;PDGFRB;CASP3	FGFR1;BAX;EP300;PHGDH;LRP6;PDGFRB;KDR;TP53;ZEB1;ITGB4;DNMT1;CREBBP;AR;TSC2;MAP2K1;HDAC1;ITGA5;MED1;GATA3;KIT;CASP3;PRKDC;BRCA2;TWIST1;NCOA1;CTNNB1;SMAD2;ITGB1;RET;KLF4;PDGFRA;NOTCH1	ATM;CTNNB1;NCOA1;PDGFRB;ITGA4;TSC2;ITGB1;FGFR1;PRKDC;ITGA5;MED1;CREBBP;NOTCH1;LRP6;MAP2K1;BRCA2;RET;EGFR;SMAD2;BAX;KLF4;TP53	PDGFRB;FGFR1;KDR;TP53;BRCA2;PHGDH;CASP3;DNMT1;ITGA4;RET;KIT	MAP2K1;SMAD2;NCOA1;ITGA5;CTNNB1;TSC2;NOTCH1;GATA3;BAX;MED1;EP300;PDGFRA;PRKDC;LRP6;TWIST1;ITGB1;RET;KLF4;ZEB1;ITGB4;HDAC1;AR;CREBBP	NOTCH1;PDGFRA;NCOA1;ITGB1;MAP2K1;CREBBP;EGFR;RET;PRKDC;KLF4;LRP6;CTNNB1;TSC2;ITGA5;YAP1;ZEB1	ITGB1;SMAD2;MED1;TSC2;KLF4	6		11		9	16
GO_RESPONSE_TO_CORTICOSTEROID	7.782	6.372	2.129	3.603	5.741	4.748	4.859	6.221	10.835	8.54	11.987		8.903	12.046	11.138	6.736	4.523	4.022		EIF4EBP1;ANXA1;FOS;BAD;SRC;DNMT3B;PTGS2		BAD;EGFR;CDKN1A;FOS;DNMT3B;ANXA1	FOS;BAD	EGFR;BAD	CLDN1;CDKN1A;FOXO1;NOTCH1	EIF4EBP1;DNMT3B;FOXO1;CASP3;EGFR;BAD		FOXO1;BAD;EGFR;CDKN1A;NOTCH1		CASP3;FOXO1;EGFR;EIF4EBP1;BAD	ANXA1;CDKN1A;DNMT3B;EGFR;FOS	FOXO1;BAD;CBX3;FOS;CASP3;CDKN1A;EGFR;NOTCH1;ANXA1;PTGS2;DNMT3B		PTGS2;FOS;ANXA1;CASP3;BAD;EIF4EBP1;SRC;DNMT3B	BAD;DNMT3B;CLDN1;FOXO1;CDKN1A;NOTCH1;PTGS2;EIF4EBP1;ANXA1;FOS;CASP3;SRC		ANXA1;EIF4EBP1;BAD;SRC;FOS;DNMT3B;PTGS2;CASP3	BAD;PTGS2;DNMT3B;SRC;CDKN1A;FOXO1;CASP3;ANXA1;FOS;CLDN1;EIF4EBP1;NOTCH1	CDKN1A;DNMT3B;ANXA1;NOTCH1;FOXO1;FOS;SRC;EIF4EBP1;BAD;PTGS2;EGFR	FOS;DNMT3B;BAD;PTGS2;CASP3;CBX3;ANXA1	FOXO1;CDKN1A;NOTCH1;CLDN1;BAD	NOTCH1;CDKN1A;EGFR;FOXO1		7		6	2	2	4
GO_REGULATION_OF_MEMBRANE_PERMEABILITY	3.444	6.354	3.994	3.28	7.368	3.268	4.683	2.678	6.253	4.476	7.523		3.324	4.85	5.043	5.587	3.147		2.888	BAD;TP53;MAPK8		BAD;STAT3;MTOR;TP53;BCL2L1	BAD;TP53	BAD;STAT3;BCL2L1	MTOR;BAX;BAK1	STAT3;MTOR;BAK1;MAPK8;YWHAZ;BAD		MTOR;BAX;BAD		BAD;STAT3;MTOR;MAPK8	MTOR;TP53	BAD;STAT3;MTOR;HK2;MAPK8;TP53		BAD;TP53;STAT3;MAPK8	MTOR;BAD;TP53;BAK1;STAT3;MAPK8;BAX		BAD;MAPK8;TP53	BAD;BAX;MAPK8;TP53;MTOR	MAPK8;MTOR;BAX;BAD;TP53	HK2;MAPK8;BAD;TP53;STAT3	BAX;BAD;MTOR		BAK1;YWHAZ	3		5	2	3	3
GO_FIBROBLAST_PROLIFERATION	4.778	6.329	2.585	9.3	1.972	7.629	2.122	5.712	12.283	4.46	13.734		3.312	12.124	12.584	4.246	8.934	8.283		PDGFRB;TP53;JUN;MYC		EGFR;PDGFRA;CDKN1A;TP53;JUN		EGFR;PDGFRA	ESR1;BAX;PDGFRA;PRKDC;CTNNB1;CDKN1A;SIRT6	EGFR;SIRT6		BAX;SIRT6;PRKDC;EGFR;CDKN1A;CTNNB1		SIRT6;EGFR	CDKN1A;JUN;EGFR;TP53	PRKDC;CTNNB1;PDGFRA;MYC;JUN;PDGFRB;ESR1;CDKN1A;EGFR;TP53		JUN;PDGFRB;TP53;MYC	SIRT6;PDGFRB;PRKDC;CDKN1A;MYC;TP53;JUN;PDGFRA;CTNNB1;BAX;ESR1		PDGFRB;TP53;JUN	ESR1;BAX;JUN;CDKN1A;PRKDC;CTNNB1;PDGFRB;TP53;SIRT6;PDGFRA	CDKN1A;CTNNB1;PDGFRB;BAX;SIRT6;JUN;MYC;TP53;PRKDC;EGFR	TP53;PDGFRB;MYC;JUN	ESR1;PDGFRA;CTNNB1;PRKDC;CDKN1A;BAX;SIRT6	PDGFRA;ESR1;PRKDC;CTNNB1;CDKN1A;EGFR		4		5		2	7
GO_REGULATION_OF_SMALL_MOLECULE_METABOLIC_PROCESS	6.327	6.319	3.272	3.074	6.529	5.875	7.191	3.41	7.642	7.768	10.466		7.086	12.793	10.085	6.143	6.507	1.873		FOXK2;PDK1;TP53;ANXA1;BAD;SRC;PTGS2;KAT2B		BAD;KIT;CAV1;PRKAA1;STAT3;MTOR;ANXA1;TP53	CAV1;BAD;TP53	CAV1;BAD;STAT3;KIT	PRKAA1;MTOR;FOXO1;HDAC4;SIRT6	STAT3;PDK1;FOXO1;MTOR;KIT;HDAC4;SIRT6;CAV1;BAD		FOXO1;HDAC4;BAD;SIRT6;CAV1;MTOR;PDK1;PRKAA1		PDK1;FOXO1;KIT;CAV1;MTOR;STAT3;HDAC4;BAD;SIRT6	MTOR;PRKAA1;TP53;ANXA1	FOXO1;HDAC4;BAD;KIT;PDK1;STAT3;MTOR;KAT2B;FOXK2;ANXA1;PTGS2;TP53	TP53;CAV1	PTGS2;TP53;ANXA1;FOXK2;PDK1;KAT2B;BAD;STAT3;SRC;KIT	MTOR;BAD;SIRT6;FOXK2;HDAC4;FOXO1;KAT2B;TP53;PTGS2;ANXA1;PRKAA1;STAT3;KIT;PDK1;SRC		ANXA1;BAD;TP53;FOXK2;KIT;SRC;PDK1;KAT2B;PTGS2	BAD;PTGS2;EP300;TWIST1;KAT2B;PDK1;SRC;KIT;FOXO1;HDAC4;CAV1;ANXA1;TP53;SIRT6;PRKAA1;MTOR;FOXK2	FOXK2;ANXA1;FOXO1;MTOR;CAV1;PRKAA1;SRC;HDAC4;SIRT6;KAT2B;BAD;PDK1;TP53;PTGS2	PDK1;KAT2B;TP53;BAD;PTGS2;ANXA1;STAT3;KIT;FOXK2	EP300;TWIST1;CAV1;FOXO1;PRKAA1;SIRT6;BAD;HDAC4;MTOR	MTOR;HDAC4;FOXO1		8		8	3	4	5
GO_POSITIVE_REGULATION_OF_IMMUNE_SYSTEM_PROCESS	6.346	6.283	2.118	1.673	4.425	3.388	5.094	4.816	6.622	7.052	7.775		5.014	8.661	7.757	6.328	5.142	1.517		PIK3CA;RB1;ANXA1;FOS;JUN;STAT1;BAD;MED1;SRC;RELA;ITGA4		BAD;CDKN1A;CAV1;FOS;SOCS1;GATA3;STAT3;ANXA1;JUN;STAT6;RELA	RELA;CAV1;FOS;BAD;CHUK	GATA3;BAD;CAV1;STAT3	BAX;CREBBP;PRKDC;CDKN1A;STAT6	MED1;STAT3;PIK3CA;CREBBP;IKBKB;RELA;STAT6;RB1;CAV1;BAD		BAX;BAD;RELA;STAT6;PRKDC;CREBBP;CDKN1A;CAV1		STAT6;CAV1;PIK3CA;RB1;IKBKB;STAT3;RELA;BAD;MED1;CREBBP	JUN;SOCS1;ANXA1;CDKN1A;RELA;STAT6;FOS	PRKDC;IKBKB;BAD;JUN;RELA;CHUK;STAT3;FOS;PIK3CA;CREBBP;CDKN1A;STAT1;ANXA1;STAT6;ITGA4;RB1	FOS;CAV1;CHUK;RELA	FOS;ANXA1;CHUK;PIK3CA;ITGA4;RELA;BAD;STAT3;SRC;STAT1;JUN;RB1;IKBKB	RELA;BAD;RB1;STAT6;PRKDC;ITGA4;IKBKB;CDKN1A;CREBBP;STAT1;CHUK;ANXA1;PIK3CA;JUN;STAT3;FOS;BAX;SRC		IKBKB;STAT1;ANXA1;PIK3CA;BAD;STAT6;SRC;RB1;FOS;JUN	BAX;EP300;RB1;STAT6;CREBBP;SRC;PIK3CA;CAV1;MED1;GATA3;TNFSF11;PRKDC;BAD;JUN;CDKN1A;ANXA1;FOS;STAT1;IKBKB	CDKN1A;ANXA1;STAT6;STAT1;CAV1;RELA;ITGA4;SRC;JUN;BAD;FOS;MED1;CREBBP;BAX;PIK3CA;PRKDC;RB1	PIK3CA;STAT6;IKBKB;FOS;STAT1;CHUK;BAD;RB1;RELA;ANXA1;STAT3;ITGA4;JUN	EP300;PRKDC;CAV1;CREBBP;CDKN1A;TNFSF11;BAX;GATA3;BAD;STAT6;MED1	STAT6;CDKN1A;CREBBP;PRKDC		11		11	5	4	5
GO_ANIMAL_ORGAN_MORPHOGENESIS	5.44	6.264	3.629	10.573	6.83	11.488	6.845	3.855	11.6	4.579	14.84		3.556	19.086	16.171	4.094	17.458	9.073	1.978	SMARCC1;TP53;FGFR1;JUN;PDGFRB;STAT1;MED1;SRC;RELA;MYC		EGFR;PDGFRA;CAV1;GATA3;STAT3;MTOR;SMAD2;TP53;JUN;STAT6;RELA	CAV1;RELA;TP53	EGFR;PDGFRA;SMAD2;GATA3;STAT3;CAV1	ESR1;SIRT6;BAX;PDGFRA;BRAF;SMAD2;ITGB4;PTEN;MTOR;BAK1;FOXO1;CTNNB1;NOTCH1;MAP2K1;LRP6;STAT6	SMAD2;MED1;STAT3;SIRT6;LRP6;BAK1;MTOR;EGFR;RELA;STAT6;ILK;CAV1;FOXO1		ILK;FOXO1;BAX;SIRT6;RELA;STAT6;MAP2K1;CAV1;MTOR;EGFR;PGR;PTEN;CTNNB1;NOTCH1;LRP6;SMAD2;BRAF		FOXO1;STAT6;CAV1;MTOR;EGFR;ILK;MED1;STAT3;RELA;SIRT6;LRP6;SMAD2	JUN;MTOR;RELA;STAT6;TP53;EGFR	SMARCC1;RELA;PDGFRB;MAP2K1;LRP6;TP53;FOXO1;YAP1;STAT1;EGFR;NOTCH1;STAT6;ZEB1;BRAF;MYC;JUN;STAT3;ESR1;CTNNB1;PDGFRA;FGFR1;MTOR	TP53;CAV1;RELA	SMARCC1;PDGFRB;TP53;RELA;MYC;STAT3;SRC;JUN;FGFR1;STAT1	PDGFRB;BRAF;TP53;STAT1;PDGFRA;PTEN;CTNNB1;BAX;MTOR;SIRT6;MYC;FGFR1;JUN;STAT3;LRP6;STAT6;NOTCH1;BAK1;SMAD2;ESR1;MAP2K1;FOXO1;ITGB4;RELA;SMARCC1;SRC		STAT1;STAT6;TP53;SRC;SMARCC1;PDGFRB;FGFR1;JUN	FGFR1;BAX;EP300;LRP6;STAT6;PDGFRB;TP53;ZEB1;ITGB4;ESR1;AR;SRC;MAP2K1;FOXO1;CAV1;HDAC1;MED1;GATA3;TNFSF11;MTOR;SMARCC1;TWIST1;JUN;BRAF;CTNNB1;SMAD2;STAT1;SIRT6;PDGFRA;NOTCH1	CTNNB1;ILK;FOXO1;PDGFRB;SIRT6;BRAF;MYC;FGFR1;MTOR;CAV1;MED1;SMARCC1;PGR;NOTCH1;LRP6;STAT6;RELA;MAP2K1;SRC;EGFR;SMAD2;STAT1;BAX;JUN;PTEN;TP53	STAT6;PDGFRB;STAT1;FGFR1;SMARCC1;TP53;MYC;RELA;STAT3;JUN	ESR1;MAP2K1;BRAF;SMAD2;CTNNB1;NOTCH1;GATA3;BAX;MED1;EP300;PDGFRA;LRP6;TWIST1;FOXO1;TNFSF11;SIRT6;ZEB1;ITGB4;HDAC1;AR;CAV1;STAT6;MTOR	MTOR;NOTCH1;ESR1;PDGFRA;FOXO1;STAT6;MAP2K1;BRAF;LRP6;CTNNB1;EGFR;YAP1;ZEB1	MED1;BAK1;SMAD2	10		11	3	6	16
GO_REPRODUCTIVE_SYSTEM_DEVELOPMENT	5.187	6.263	6.633	10.565	6.473	10.464	6.02	1.474	12.963	5.553	16.171		5.936	18.776	15.922	4.247	12.338	9.275	1.807	SMARCC1;BRCA2;ANXA1;PDGFRB;MED1;SRC;PTGS2		EGFR;PDGFRA;KIT;NCOA1;GATA3;ATM;ANXA1;BCL2L1		EGFR;PDGFRA;GATA3;ATM;NCOA1;BCL2L1;KIT	NCOA1;ESR1;BAX;PDGFRA;IDH1;PTEN;CDKN1B;BAK1;CTNNB1;NOTCH1;MAP2K1;LRP6	MED1;NCOA1;ATM;CDKN1B;LRP6;BAK1;CASP3;EGFR;KIT		BAX;PTEN;MAP2K1;CDKN1B;EGFR;ATM;PGR;NCOA1;IDH1;CTNNB1;NOTCH1;LRP6		CASP3;CDKN1B;KIT;EGFR;NCOA1;MED1;ATM;LRP6	EGFR;ANXA1	CTNNB1;PDGFRA;NCOA1;SMARCC1;KIT;KDM5A;BRCA2;PDGFRB;MAP2K1;CASP3;CDKN1B;LRP6;ESR1;EGFR;NOTCH1;ANXA1;PTGS2		SMARCC1;PTGS2;PDGFRB;ANXA1;BRCA2;CASP3;SRC;KIT	BRCA2;PDGFRB;CDKN1B;PDGFRA;PTEN;CTNNB1;BAX;CASP3;NCOA1;LRP6;IDH1;NOTCH1;PTGS2;BAK1;ESR1;MAP2K1;ANXA1;SMARCC1;KIT;SRC		ANXA1;SMARCC1;SRC;KIT;BRCA2;PTGS2;PDGFRB;CASP3	BAX;LRP6;PDGFRB;CDKN1B;ESR1;AR;SRC;MAP2K1;KDM5A;MED1;GATA3;PTGS2;KIT;CASP3;SMARCC1;NCOA1;ANXA1;CTNNB1;IDH1;BRCA2;PDGFRA;NOTCH1	ATM;CTNNB1;NCOA1;PDGFRB;ANXA1;MED1;SMARCC1;PGR;NOTCH1;LRP6;IDH1;SRC;MAP2K1;BRCA2;CDKN1B;PTGS2;EGFR;BAX;PTEN	PDGFRB;SMARCC1;BRCA2;PTGS2;CASP3;ANXA1;KIT	ESR1;PDGFRA;MAP2K1;CTNNB1;LRP6;AR;KDM5A;NOTCH1;GATA3;BAX;MED1;NCOA1;CDKN1B;IDH1	NOTCH1;ESR1;NCOA1;PDGFRA;KDM5A;MAP2K1;CDKN1B;LRP6;CTNNB1;EGFR	MED1;BAK1	7		8		7	12
GO_REGULATION_OF_MITOTIC_CELL_CYCLE	6.292	6.26	4.672	6.829	8.319	10.012	7.01	2.937	11.733	7.433	12.347		9.092	13.529	16.762	7.822	6.25	5.75	1.559	BRCA2;RB1;TP53;ANXA1;PDGFRB;AURKA;MKI67;FGFR1;EIF4EBP1		EGFR;RPS6KB1;CDKN1A;ATM;RPTOR;ANXA1;TP53;CHEK1;BCL2L1	RPTOR;CHEK1;TP53	EGFR;ATM;CHEK1;RPS6KB1;RPTOR;BCL2L1	BAX;CHEK2;PRKDC;PTEN;RPS6KB1;CDKN1B;CTNNB1;CDKN1A;KLF4;CHEK1	BECN1;KLF4;CHEK1;EIF4EBP1;ATM;CDKN1B;EGFR;RPTOR;CHEK2;RPS6KB1;RB1;EZH2		CHEK2;BAX;PRKDC;RPTOR;CDKN1B;EGFR;ATM;RPS6KB1;CDKN1A;PTEN;CTNNB1;KLF4;CHEK1		RPS6KB1;CDKN1B;CHEK1;RPTOR;CHEK2;EGFR;EIF4EBP1;RB1;BECN1;ATM	CDKN1A;EGFR;TP53;ANXA1	PRKDC;KLF4;CTNNB1;FGFR1;BRCA2;PDGFRB;MKI67;RPTOR;CHEK1;CHEK2;CDKN1B;AURKA;EGFR;CDKN1A;ANXA1;RPS6KB1;TP53;RB1	TP53;CHEK1;RPTOR	PDGFRB;TP53;MKI67;RPS6KB1;BRCA2;ANXA1;EIF4EBP1;AURKA;CHEK2;FGFR1;RB1	AURKA;CHEK2;BRCA2;PDGFRB;CHEK1;TP53;CDKN1B;PTEN;CTNNB1;BAX;PRKDC;FGFR1;EIF4EBP1;RPS6KB1;MKI67;RB1;KLF4;CDKN1A;ANXA1		CHEK1;ANXA1;EIF4EBP1;TP53;RB1;RPS6KB1;MKI67;BRCA2;AURKA;CHEK2;PDGFRB;FGFR1	RPS6KB1;FGFR1;BAX;EP300;CHEK1;RB1;PDGFRB;TP53;CHEK2;MKI67;CDKN1B;RPTOR;PRKDC;AURKA;EIF4EBP1;CDKN1A;ANXA1;CTNNB1;BRCA2;KLF4	ATM;CTNNB1;PDGFRB;EIF4EBP1;FGFR1;PRKDC;CDKN1A;ANXA1;RPTOR;KLF4;AURKA;MKI67;BRCA2;CDKN1B;CHEK1;EGFR;BAX;CHEK2;RPS6KB1;PTEN;TP53;RB1	MKI67;RPTOR;PDGFRB;FGFR1;TP53;RB1;CHEK2;BRCA2;CHEK1;RPS6KB1;ANXA1;AURKA	CTNNB1;EP300;PRKDC;RPTOR;RPS6KB1;CDKN1A;BAX;CHEK2;CDKN1B;KLF4	CHEK2;PRKDC;KLF4;CDKN1B;CTNNB1;RPS6KB1;CDKN1A;EGFR	EZH2;KLF4	9		9	3	6	10
GO_NEGATIVE_REGULATION_OF_CELLULAR_RESPONSE_TO_INSULIN_STIMULUS		6.252		4.296	4.142	6.034	4.335	5.132	3.619	2.677	5.046			3.586	5.217	2.563	4.144	2.986				SOCS1;PRKAA1;RPS6KB1;RELA			PRKAA1;TSC2;RPS6KB1	TSC2;RPS6KB1;RELA		TSC2;RELA;RPS6KB1;PRKAA1		RPS6KB1;RELA;TSC2	RELA;PRKAA1;SOCS1	TSC2;RELA;RPS6KB1		RELA;RPS6KB1	RELA;TSC2;RPS6KB1;PRKAA1			PRKAA1;RPS6KB1;TSC2	RPS6KB1;TSC2;PRKAA1;RELA	RELA;RPS6KB1	PRKAA1;TSC2;RPS6KB1	RPS6KB1;TSC2				4			3
GO_MUSCLE_STRUCTURE_DEVELOPMENT	3.515	6.246	3.682	5.804	10.565	6.72	9.25	2.93	11.703	4.589	10.279		4.057	14.58	10.079	5.852	10.456	5.736	2.489	RB1;FGFR1;FOS;KDM1A;PDGFRB;MED1		PDGFRA;KIT;CAV1;FOS;DNMT1;PRKAA1;MTOR;ERBB3;ITGB1	CAV1;FOS;CHUK	PDGFRA;CAV1;ERBB3;KIT;DNMT1	PDGFRA;PRKAA1;PTEN;MTOR;CTNNB1;ITGB1;HDAC4;NOTCH1;SIRT6	MED1;ERBB3;RB1;PIAS1;MTOR;CASP3;KIT;DNMT1;ITGB1;ILK;EZH2;HDAC4;SIRT6;CAV1		ILK;HDAC4;SIRT6;CAV1;MTOR;PTEN;CTNNB1;ITGB1;NOTCH1;PRKAA1		CASP3;ERBB3;PIAS1;CAV1;MTOR;DNMT1;ILK;RB1;MED1;HDAC4;KIT;SIRT6	MTOR;PRKAA1;FOS;ITGB1	HDAC4;PDGFRA;FGFR1;CTNNB1;KIT;CHUK;PDGFRB;KDM1A;CASP3;MTOR;FOS;YAP1;DNMT1;ITGB1;RB1;ZEB1;NOTCH1;PIAS1	FOS;CAV1;CHUK	KDM1A;PDGFRB;FOS;CHUK;CASP3;KIT;FGFR1;RB1	MTOR;RB1;SIRT6;PDGFRB;HDAC4;KIT;ITGB1;CHUK;FGFR1;NOTCH1;CTNNB1;PRKAA1;PDGFRA;PTEN;FOS;CASP3;KDM1A		FGFR1;RB1;KIT;DNMT1;FOS;PDGFRB;CASP3	EP300;HDAC4;RB1;PDGFRB;ZEB1;PRKAA1;DNMT1;CAV1;MED1;SIRT6;KIT;CASP3;MTOR;ERBB3;TWIST1;FOS;CTNNB1;ITGB1;FGFR1;PDGFRA;NOTCH1	CTNNB1;ILK;KDM1A;MTOR;PDGFRB;PRKAA1;HDAC4;CAV1;SIRT6;FOS;MED1;ITGB1;FGFR1;PTEN;RB1;NOTCH1	PIAS1;PDGFRB;FOS;FGFR1;KDM1A;CHUK;RB1;CASP3;DNMT1;KIT	CTNNB1;PDGFRA;ZEB1;EP300;TWIST1;ERBB3;ITGB1;CAV1;PRKAA1;NOTCH1;SIRT6;HDAC4;MED1;MTOR	MTOR;NOTCH1;PDGFRA;HDAC4;ITGB1;CTNNB1;YAP1;ZEB1	MED1;EZH2;ITGB1	6		9	3	5	9
GO_POSTTRANSCRIPTIONAL_REGULATION_OF_GENE_EXPRESSION		6.23	4.657	4.871	6.236	5.729	4.979	2.925	3.767	1.67	5.003			5.042	5.449		5.284	4.714	2.486			EGFR;RPS6KB1;ERBB2;CAV1;VIM;STAT3;MTOR;SMAD2;TP53	CAV1;TP53;ERBB2	EGFR;SMAD2;RPS6KB1;STAT3;ERBB2;CAV1	ESR1;VIM;SMAD2;ERBB2;PRKDC;RPS6KB1;MTOR;MAP2K1	SMAD2;EIF4EBP1;STAT3;VIM;MTOR;EGFR;RPS6KB1;ERBB2;YWHAZ;CAV1		VIM;PRKDC;ERBB2;MAP2K1;CAV1;MTOR;EGFR;RPS6KB1;SMAD2		RPS6KB1;ERBB2;CAV1;MTOR;EGFR;EIF4EBP1;STAT3;SMAD2	MTOR;EGFR;TP53;VIM	PRKDC;VIM;STAT3;MTOR;MAP2K1;ESR1;EGFR;RPS6KB1;TP53	TP53;ERBB2;CAV1	EIF4EBP1;TP53;STAT3;RPS6KB1	MTOR;PRKDC;MAP2K1;ERBB2;TP53;EIF4EBP1;SMAD2;RPS6KB1;STAT3;VIM;ESR1			RPS6KB1;ESR1;VIM;MAP2K1;CAV1;PRKDC;SMAD2;TP53;EIF4EBP1;ERBB2;MTOR	ERBB2;SMAD2;MTOR;CAV1;MAP2K1;EIF4EBP1;RPS6KB1;VIM;TP53;PRKDC;EGFR		ESR1;MAP2K1;PRKDC;RPS6KB1;CAV1;ERBB2;SMAD2;MTOR;VIM	MTOR;ESR1;MAP2K1;PRKDC;VIM;RPS6KB1;EGFR	SMAD2;VIM;YWHAZ			9	3	6	8
GO_DNA_METABOLIC_PROCESS	6.264	6.216	3.213	5.729	6.979	6.559	5.004	4.342	12.545	7.162	12.054		8.803	13.152	13.088	10.417	6.027	4.006	2.209	EHMT2;PIK3CA;BRCA2;TP53;FOS;KDM1A;PDGFRB;SRC;DNMT3B;MYC		EGFR;CDKN1A;FOS;DNMT1;GATA3;ATM;DNMT3B;TP53;CHEK1;STAT6	FOS;CHEK1;ATR;TP53	EGFR;GATA3;ATM;CHEK1;DNMT1	SIRT6;BAX;ATR;CHEK2;PRKDC;CTNNB1;CDKN1A;KLF4;STAT6;CHEK1	KLF4;CHEK1;DNMT3B;PIK3CA;ATM;CASP3;EGFR;DNMT1;CHEK2;STAT6;SIRT6;EZH2		CHEK2;BAX;SIRT6;PRKDC;STAT6;EGFR;ATM;CDKN1A;CHEK1;CTNNB1;KLF4		CASP3;CHEK1;STAT6;CHEK2;EGFR;DNMT1;PIK3CA;SIRT6;ATM	CDKN1A;STAT6;TP53;DNMT3B;EGFR;FOS	PDGFRB;CHEK1;TP53;EHMT2;PRKDC;KDM1A;CHEK2;EGFR;STAT6;KLF4;MYC;BRCA2;CASP3;CHAF1A;PIK3CA;DNMT1;DNMT3B;CTNNB1;FOS;ATR;CDKN1A	TP53;FOS;CHEK1;ATR	KDM1A;PDGFRB;TP53;EHMT2;FOS;BRCA2;CASP3;PIK3CA;MYC;SRC;CHEK2;DNMT3B	ATR;CHEK2;BRCA2;PDGFRB;CHEK1;TP53;CTNNB1;CASP3;BAX;EHMT2;SIRT6;PRKDC;SRC;MYC;FOS;STAT6;PIK3CA;DNMT3B;KLF4;CDKN1A;KDM1A		CHEK1;PIK3CA;STAT6;TP53;SRC;CHAF1A;DNMT1;FOS;DNMT3B;BRCA2;CHEK2;PDGFRB;CASP3	BAX;EP300;CHEK1;STAT6;PDGFRB;TP53;CHEK2;DNMT1;SRC;PIK3CA;GATA3;DNMT3B;CASP3;PRKDC;BRCA2;TWIST1;CDKN1A;FOS;CTNNB1;KLF4;CHAF1A;SIRT6	DNMT3B;ATM;CTNNB1;PDGFRB;SIRT6;MYC;PRKDC;CDKN1A;EHMT2;KDM1A;FOS;PIK3CA;STAT6;SRC;BRCA2;CHEK1;EGFR;BAX;KLF4;TP53;CHEK2	PIK3CA;STAT6;CHAF1A;PDGFRB;FOS;DNMT3B;KDM1A;TP53;BRCA2;CHEK2;MYC;CHEK1;CASP3;ATR;DNMT1;EHMT2	CTNNB1;EP300;PRKDC;TWIST1;CDKN1A;BAX;GATA3;CHEK2;SIRT6;STAT6;KLF4	CHEK2;STAT6;PRKDC;KLF4;CTNNB1;CDKN1A;EGFR	EZH2;KLF4;DNMT3B	10		10	4	5	10
GO_TEMPERATURE_HOMEOSTASIS	2.651	6.211	3.23	4.662	9.692	5.878	8.85	3.339	7.917	4.476	8.964		2.522	7.787	8.169	5.309	6.854	3.92		PTGS2;KDM1A;RB1		STAT6;HDAC3;CAV1;STAT3;PRKAB1;IGF1R		STAT3;HDAC3;CAV1	SIRT6;FOXO1;MAP2K6;NOTCH1;STAT6	PRKAB1;STAT3;RB1;MAP2K6;STAT6;SIRT6;CAV1;HDAC3;FOXO1		FOXO1;MAP2K6;SIRT6;STAT6;NOTCH1;CAV1		FOXO1;MAP2K6;STAT6;CAV1;HDAC3;RB1;STAT3;SIRT6	STAT6;IGF1R;PRKAB1	HDAC3;FOXO1;MAP2K6;STAT3;KDM1A;NOTCH1;PTGS2;STAT6;RB1		PTGS2;KDM1A;HDAC3;STAT3;RB1	RB1;SIRT6;STAT6;MAP2K6;FOXO1;NOTCH1;PTGS2;HDAC3;STAT3;KDM1A		PTGS2;STAT6;RB1	PTGS2;TNFSF11;MAP2K6;FOXO1;CAV1;RB1;STAT6;SIRT6;NOTCH1	FOXO1;KDM1A;STAT6;CAV1;SIRT6;MAP2K6;PTGS2;RB1;NOTCH1	STAT6;KDM1A;RB1;PTGS2;HDAC3;STAT3	MAP2K6;CAV1;FOXO1;TNFSF11;SIRT6;NOTCH1;STAT6	NOTCH1;MAP2K6;FOXO1;STAT6		3		6		3	5
GO_REGULATION_OF_CELL_CYCLE_G1_S_PHASE_TRANSITION	3.724	6.211	3.23	7.245	8.237	11.624	6.016	4.679	10.511	4.476	10.279		4.664	11.696	15.189	5.309	8.216	6.552	2.421	TP53;AURKA;RB1;ANXA1		EGFR;CDKN1A;ATM;RPTOR;ANXA1;TP53	RPTOR;TP53	EGFR;ATM;RPTOR	BAX;CHEK2;PRKDC;PTEN;CDKN1B;CDKN1A;KLF4	KLF4;ATM;CDKN1B;EGFR;RPTOR;CHEK2;RB1;EZH2		CHEK2;BAX;PRKDC;RPTOR;CDKN1B;EGFR;ATM;CDKN1A;PTEN;KLF4		CDKN1B;RPTOR;CHEK2;EGFR;RB1;ATM	CDKN1A;EGFR;TP53;ANXA1	PRKDC;KLF4;RPTOR;CHEK2;CDKN1B;AURKA;EGFR;CDKN1A;ANXA1;TP53;RB1	TP53;RPTOR	TP53;ANXA1;AURKA;CHEK2;RB1	AURKA;CHEK2;RB1;PRKDC;KLF4;CDKN1A;CDKN1B;TP53;ANXA1;PTEN;BAX		ANXA1;TP53;RB1;AURKA;CHEK2	CDKN1B;BAX;EP300;CDKN1A;ANXA1;RB1;PRKDC;AURKA;TP53;CHEK2;KLF4;RPTOR	CDKN1A;ANXA1;ATM;CDKN1B;BAX;CHEK2;AURKA;RPTOR;KLF4;PTEN;TP53;PRKDC;RB1;EGFR	RPTOR;TP53;RB1;CHEK2;ANXA1;AURKA	EP300;PRKDC;RPTOR;CDKN1A;BAX;CHEK2;CDKN1B;KLF4	CHEK2;PRKDC;KLF4;CDKN1B;CDKN1A;EGFR	EZH2;KLF4	4		6	2	3	7
GO_MACROAUTOPHAGY	6.19	6.204		2.794	10.433	4.681	8.5	6.471	11.768	7.917	10.256		8.349	12.761	10.885	9.927	4.407	2.273	3.13	PIK3CA;TP53;ATG7;ULK1;MAPK8;SRC;ATG3		PRKAA1;RPTOR;MTOR;TP53;SQSTM1;PRKAB1;MAP1LC3B	RPTOR;SQSTM1;TP53		TSC2;PRKAA1;MTOR;MAP1LC3A	TSC2;MAP1LC3B;BECN1;ATG3;PIK3CA;MTOR;KDR;MAPK8;CASP3;RPTOR;PRKAB1		ATG12;MAP1LC3A;RPTOR;MTOR;TSC2;PRKAA1		CASP3;RPTOR;MTOR;TSC2;MAPK8;PIK3CA;ATG3;KDR;BECN1	MTOR;MAP1LC3B;PRKAB1;PRKAA1;TP53;SQSTM1	KDR;ULK1;MAP1LC3A;TSC2;MTOR;CASP3;RPTOR;PIK3CA;ATG3;SQSTM1;MAPK8;ATG12;TP53;ATG7	TP53;SQSTM1;RPTOR	TP53;KDR;CASP3;PIK3CA;ATG3;MAPK8;ATG7;ULK1;SRC	MTOR;ATG3;ATG7;MAP1LC3A;ULK1;TP53;TSC2;PIK3CA;PRKAA1;KDR;MAPK8;CASP3;SRC		ATG7;PIK3CA;TP53;SRC;ATG3;ULK1;KDR;MAPK8;CASP3	MAP1LC3A;ATG7;SRC;TSC2;PIK3CA;ATG3;SQSTM1;CASP3;MAPK8;ULK1;TP53;KDR;PRKAA1;MTOR;RPTOR	ATG3;ULK1;ATG12;MAPK8;MTOR;PRKAA1;SRC;MAP1LC3A;TSC2;RPTOR;ATG7;TP53;PIK3CA	ATG7;PIK3CA;RPTOR;ATG3;ULK1;MAPK8;KDR;ATG12;TP53;CASP3;SQSTM1	RPTOR;MAP1LC3A;TSC2;PRKAA1;SQSTM1;MTOR	MTOR;TSC2;MAP1LC3A	MAP1LC3B;PRKAB1;TSC2	7		7	3		4
GO_ANATOMICAL_STRUCTURE_FORMATION_INVOLVED_IN_MORPHOGENESIS	5.381	6.204	4.44	13.855	10.589	13.67	8.732	2.208	14.286	6.058	19.805		5.78	23.275	19.219	7.072	18.481	7.922	4.437	PIK3CA;TP53;FGFR1;ANXA1;JUN;PDGFRB;STAT1;MED1;PTGS2;ITGA4		PDGFRA;ERBB2;CAV1;ATM;GATA3;STAT3;SMAD2;TP53;ANXA1;JUN;ITGB1	CAV1;TP53;ERBB2	PDGFRA;SMAD2;GATA3;ATM;STAT3;ERBB2;CAV1	TSC2;ERBB2;PRKDC;ITGB1;SIRT6;PDGFRA;SMAD2;PTEN;LRP6;ITGB4;RET;ITGA5;FOXO1;NOTCH1;SHC1;JAK1;CTNNB1;KLF4;MAP2K1	TSC2;SMAD2;KLF4;MED1;STAT3;PIK3CA;ATM;SIRT6;LRP6;KDR;CASP3;ITGB1;ERBB2;YWHAZ;ILK;CAV1;FOXO1		ITGA5;SIRT6;TSC2;ITGB1;CAV1;RET;PTEN;NOTCH1;JAK1;ILK;FOXO1;PRKDC;ERBB2;KLF4;LRP6;SMAD2;MAP2K1;ATM;CTNNB1		CASP3;FOXO1;ERBB2;CAV1;TSC2;PIK3CA;ILK;MED1;KDR;STAT3;SMAD2;SIRT6;ATM;LRP6	JUN;TP53;ANXA1;ITGB1	PDGFRB;MAP2K1;LRP6;TP53;PRKDC;FOXO1;ITGA5;STAT1;NOTCH1;ITGA4;KLF4;KDR;JUN;STAT3;CASP3;PIK3CA;RET;ITGB1;CTNNB1;PDGFRA;FGFR1;TSC2;HK2;ANXA1;PTGS2	TP53;ERBB2;CAV1	PTGS2;PDGFRB;TP53;KDR;ANXA1;CASP3;PIK3CA;ITGA4;STAT3;JUN;FGFR1;STAT1	PDGFRB;ITGB1;RET;JAK1;TP53;STAT1;PDGFRA;PTEN;CTNNB1;CASP3;SIRT6;PRKDC;ERBB2;FGFR1;ITGA5;TSC2;JUN;STAT3;KDR;LRP6;NOTCH1;PTGS2;SHC1;PIK3CA;SMAD2;KLF4;MAP2K1;ITGA4;FOXO1;ITGB4;ANXA1		STAT1;ANXA1;PIK3CA;TP53;CASP3;RET;KDR;PTGS2;PDGFRB;FGFR1;JUN	FGFR1;EP300;LRP6;PDGFRB;TP53;KDR;ITGB4;AR;TSC2;PIK3CA;MAP2K1;CAV1;HDAC1;FOXO1;ITGA5;MED1;GATA3;PTGS2;CASP3;JAK1;PRKDC;TWIST1;JUN;ANXA1;CTNNB1;SMAD2;KLF4;ITGB1;STAT1;RET;SIRT6;PDGFRA;ERBB2;NOTCH1	ERBB2;ATM;CTNNB1;ILK;FOXO1;PDGFRB;ITGA4;SIRT6;TSC2;JAK1;ITGB1;FGFR1;PRKDC;ANXA1;ITGA5;CAV1;MED1;PIK3CA;NOTCH1;LRP6;MAP2K1;RET;PTGS2;SMAD2;STAT1;JUN;KLF4;PTEN;TP53	PIK3CA;HK2;PDGFRB;STAT1;FGFR1;KDR;TP53;PTGS2;CASP3;ANXA1;STAT3;ITGA4;RET;JUN	MAP2K1;SMAD2;ITGA5;CTNNB1;JAK1;TSC2;NOTCH1;GATA3;MED1;EP300;PDGFRA;PRKDC;LRP6;TWIST1;ITGB1;RET;FOXO1;SIRT6;KLF4;ITGB4;HDAC1;AR;CAV1;ERBB2	NOTCH1;PDGFRA;FOXO1;ITGB1;MAP2K1;RET;PRKDC;KLF4;LRP6;CTNNB1;TSC2;ITGA5	ITGB1;SMAD2;MED1;TSC2;KLF4;YWHAZ	10		11	3	7	19
GO_NEGATIVE_REGULATION_OF_CATABOLIC_PROCESS	5.018	6.204	2.688	5.836	7.804	8.243	8.5	5.161	10.532	5.556	11.452		3.749	9.166	12.141	5.172	5.453	5.37		FOXK2;SMARCC1;PIK3CA;TP53;ATG7;RELA		EGFR;MET;PRKAA1;STAT3;MTOR;TP53;RELA	RELA;TP53	EGFR;MET;STAT3	MET;PRKAA1;TSC2;MTOR;KDM4A;HDAC4;SIRT6	TSC2;STAT3;PIK3CA;MTOR;EGFR;RELA;HDAC4;MET;SIRT6		HDAC4;SIRT6;RELA;MTOR;EGFR;KDM4A;TSC2;MET;PRKAA1		MET;MTOR;EGFR;TSC2;PIK3CA;STAT3;RELA;HDAC4;SIRT6	MTOR;RELA;PRKAA1;TP53;EGFR	KDM4A;HDAC4;SMARCC1;RELA;MET;STAT3;TSC2;MTOR;PIK3CA;EGFR;FOXK2;TP53;ATG7	TP53;RELA	SMARCC1;TP53;FOXK2;PIK3CA;RELA;ATG7;STAT3	RELA;MTOR;SIRT6;ATG7;FOXK2;MET;HDAC4;TP53;TSC2;KDM4A;PIK3CA;PRKAA1;STAT3;SMARCC1		ATG7;PIK3CA;SMARCC1;FOXK2;TP53	ATG7;SMARCC1;TSC2;PIK3CA;HDAC4;TP53;KDM4A;SIRT6;PRKAA1;MET;MTOR;FOXK2	FOXK2;MET;MTOR;PRKAA1;RELA;HDAC4;SIRT6;KDM4A;TSC2;SMARCC1;ATG7;TP53;PIK3CA;EGFR	ATG7;PIK3CA;SMARCC1;TP53;RELA;STAT3;FOXK2	TSC2;KDM4A;PRKAA1;SIRT6;MET;HDAC4;MTOR	KDM4A;MTOR;HDAC4;TSC2;EGFR;MET		6		7	2	3	7
GO_LIPID_METABOLIC_PROCESS	3.913	6.173	3.947	4.13	6.509	5.501	5.827	3.375	5.303	3.799	7.645		3.578	8.478	8.545	2.794	4.932	2.968	1.738	PDK1;PIK3CA;RB1;FGFR1;ANXA1;PDGFRB;MED1;SRC;PTGS2		EGFR;PDGFRA;KIT;CAV1;HDAC3;NCOA1;SOCS1;PRKAA1;ATM;MTOR;ANXA1;PRKAB1		EGFR;PDGFRA;ATM;NCOA1;KIT;CAV1;HDAC3	NCOA1;ESR1;BAX;IDH1;PDGFRA;CREBBP;PRKAA1;PTEN;MTOR;KLF4	PRKAB1;KLF4;MED1;NCOA1;PDK1;PIK3CA;ATM;MTOR;CREBBP;EGFR;KIT;RB1;CAV1;HDAC3		BAX;PRKAA1;PTEN;MTOR;EGFR;CREBBP;PDK1;ATM;NCOA1;IDH1;KLF4;CAV1		PDK1;CREBBP;KIT;CAV1;MTOR;EGFR;PIK3CA;HDAC3;RB1;NCOA1;MED1;ATM	SOCS1;ANXA1;MTOR;PRKAB1;PRKAA1;EGFR	KLF4;HDAC3;PDGFRA;NCOA1;FGFR1;KIT;PDK1;PDGFRB;MTOR;PIK3CA;CREBBP;ESR1;EGFR;ANXA1;PTGS2;RB1		PTGS2;PDGFRB;ANXA1;PIK3CA;PDK1;HDAC3;SRC;KIT;FGFR1;RB1	PDGFRB;PRKAA1;HDAC3;PDGFRA;PTEN;BAX;NCOA1;MTOR;CREBBP;FGFR1;PDK1;IDH1;PTGS2;PIK3CA;ESR1;RB1;KLF4;ANXA1;KIT;SRC		ANXA1;PIK3CA;SRC;KIT;RB1;PDK1;PTGS2;PDGFRB;FGFR1	BAX;RB1;PDGFRB;PRKAA1;ESR1;CREBBP;SRC;PIK3CA;CAV1;MED1;PTGS2;PDK1;KIT;MTOR;TWIST1;NCOA1;ANXA1;IDH1;KLF4;FGFR1;PDGFRA	ATM;NCOA1;PDGFRB;PRKAA1;PDK1;FGFR1;ANXA1;MTOR;CAV1;MED1;CREBBP;PIK3CA;IDH1;SRC;PTGS2;EGFR;BAX;KLF4;PTEN;RB1	PIK3CA;PDK1;PDGFRB;FGFR1;RB1;PTGS2;HDAC3;ANXA1;KIT	ESR1;PDGFRA;TWIST1;CAV1;CREBBP;PRKAA1;BAX;MED1;NCOA1;MTOR;IDH1;KLF4	MTOR;PDGFRA;ESR1;NCOA1;CREBBP;KLF4;EGFR	MED1;KLF4;PRKAB1	9		12		7	10
GO_NEGATIVE_REGULATION_OF_MOLECULAR_FUNCTION	8.168	6.171	2.08	7.428	10.54	10.234	9.735	4.747	16.222	9.698	17.622		7.546	17.749	18.045	8.84	9.378	6.872	1.955	PDK1;RB1;DEPTOR;TP53;ANXA1;JUN;KDM1A;AURKA;MAPK8;SRC;PTGS2;ITGA4;KAT2B		DEPTOR;AKT1S1;CDKN1A;CAV1;MET;SOCS1;RPTOR;TP53;ANXA1;JUN;IGF1R	RPTOR;CAV1;CHUK;TP53	RPTOR;MET;CAV1;DEPTOR	ESR1;BAX;MET;TSC2;PTEN;CDKN1B;AKT1S1;CDKN1A;HDAC4;KLF4;NOTCH1;LRP6;NFKBIA	TSC2;KLF4;PDK1;RB1;DEPTOR;CDKN1B;LRP6;MAPK8;IKBKB;NFKBIA;CASP3;RPTOR;EZH2;HDAC4;MET;ILK;CAV1		ILK;HDAC4;BAX;RPTOR;CDKN1B;AKT1S1;PDK1;CDKN1A;PTEN;TSC2;KLF4;MET;NOTCH1;LRP6;CAV1;NFKBIA		CASP3;PDK1;CDKN1B;RPTOR;CAV1;MET;TSC2;MAPK8;ILK;DEPTOR;RB1;IKBKB;HDAC4;NFKBIA;LRP6	JUN;SOCS1;ANXA1;CDKN1A;TP53;IGF1R;AKT1S1	HDAC4;KAT2B;LRP6;TP53;PDK1;CHUK;NFKBIA;KDM1A;AURKA;NOTCH1;ITGA4;RB1;KLF4;IKBKB;JUN;KDM5A;CASP3;RPTOR;ESR1;MAPK8;MET;TSC2;CDKN1B;CDKN1A;ANXA1;PTGS2;DEPTOR	TP53;CAV1;RPTOR;CHUK	PTGS2;KDM1A;TP53;ANXA1;CHUK;CASP3;ITGA4;PDK1;MAPK8;KAT2B;SRC;AURKA;JUN;DEPTOR;RB1;IKBKB	AURKA;HDAC4;NFKBIA;AKT1S1;KDM1A;TP53;CDKN1B;CHUK;PTEN;BAX;CASP3;TSC2;JUN;PDK1;LRP6;IKBKB;DEPTOR;KAT2B;NOTCH1;PTGS2;MAPK8;ESR1;RB1;KLF4;MET;ITGA4;CDKN1A;ANXA1;SRC		IKBKB;ANXA1;KAT2B;TP53;SRC;RB1;DEPTOR;PDK1;AURKA;PTGS2;MAPK8;CASP3;JUN	BAX;LRP6;HDAC4;RB1;TP53;DEPTOR;ESR1;CDKN1B;KAT2B;SRC;TSC2;CAV1;KDM5A;AKT1S1;MET;RPTOR;PTGS2;PDK1;CASP3;AURKA;TWIST1;JUN;NFKBIA;CDKN1A;ANXA1;MAPK8;KLF4;IKBKB;NOTCH1	ILK;HDAC4;ITGA4;TSC2;PDK1;AKT1S1;CDKN1A;ANXA1;MET;KDM1A;DEPTOR;CAV1;KAT2B;RPTOR;NOTCH1;LRP6;MAPK8;SRC;AURKA;CDKN1B;PTGS2;BAX;JUN;NFKBIA;KLF4;PTEN;TP53;RB1	PDK1;RPTOR;IKBKB;MAPK8;KDM1A;CHUK;KAT2B;TP53;RB1;PTGS2;CASP3;ANXA1;ITGA4;AURKA;DEPTOR;JUN	ESR1;NFKBIA;RPTOR;LRP6;TWIST1;AKT1S1;KDM5A;TSC2;CAV1;CDKN1A;NOTCH1;MET;BAX;HDAC4;CDKN1B;KLF4	NOTCH1;ESR1;KDM5A;HDAC4;KLF4;CDKN1B;LRP6;TSC2;CDKN1A;MET;NFKBIA	EZH2;KLF4;TSC2	13		11	4	4	13
GO_CELLULAR_RESPONSE_TO_RADIATION	3.692	6.164	4.434	7.181	4.348	5.83	3.54	2.125	9.083	4.433	10.178		3.532	7.705	9.384	6.476	5.519	3.891		TP53;KDM1A;PTGS2;MYC		CDKN1A;ATM;GATA3;TP53;CHEK1;BCL2L1	CHEK1;ATR;TP53	ATM;CHEK1;BCL2L1;GATA3	BAX;CREBBP;ATR;CHEK2;BAK1;CDKN1A;CHEK1	CHEK1;ATM;CREBBP;BAK1;CHEK2		CHEK2;BAX;CREBBP;ATM;CDKN1A;CHEK1		CREBBP;CHEK1;CHEK2;ATM	CDKN1A;TP53	MYC;KDM1A;CHEK1;CHEK2;ATR;YAP1;CREBBP;CDKN1A;PTGS2;TP53	TP53;CHEK1;ATR	PTGS2;KDM1A;TP53;MYC;CHEK2	ATR;CHEK2;CHEK1;MYC;CREBBP;PTGS2;CDKN1A;TP53;BAK1;BAX;KDM1A		CHEK2;CHEK1;PTGS2;TP53	PTGS2;CREBBP;BAX;EP300;CDKN1A;CHEK1;CHEK2;TP53;GATA3	CDKN1A;ATM;KDM1A;BAX;CHEK2;TP53;CREBBP;MYC;CHEK1;PTGS2	KDM1A;MYC;TP53;CHEK2;PTGS2;CHEK1;ATR	EP300;CREBBP;CDKN1A;BAX;GATA3;CHEK2	CDKN1A;YAP1;CREBBP;CHEK2		4		6	3	4	7
GO_CELLULAR_RESPONSE_TO_HYDROGEN_PEROXIDE	4.621	6.133		7.391	7.093	8.99	4.504	5.565	8.74	4.298	11.635		4.436	10.135	12.13	4.089	7.071	6.405	2.811	PDGFRB;SRC;RELA;ANXA1		MET;PRKAA1;ANXA1;STAT6;RELA			MET;PRKAA1;MAP1LC3A;FOXO1;KLF4;STAT6	KLF4;RELA;MET;STAT6;EZH2;FOXO1		FOXO1;MAP1LC3A;RELA;STAT6;KLF4;MET;PRKAA1		STAT6;MET;RELA;FOXO1	RELA;PRKAA1;ANXA1;STAT6	KLF4;FOXO1;MET;MAP1LC3A;RELA;PDGFRB;ANXA1;STAT6		ANXA1;PDGFRB;RELA;SRC	MAP1LC3A;STAT6;PDGFRB;KLF4;MET;FOXO1;ANXA1;PRKAA1;RELA;SRC		SRC;PDGFRB;ANXA1;STAT6	MAP1LC3A;SRC;FOXO1;ANXA1;STAT6;PDGFRB;KLF4;PRKAA1;MET	ANXA1;MET;FOXO1;STAT6;PDGFRB;PRKAA1;SRC;RELA;MAP1LC3A;KLF4	STAT6;RELA;PDGFRB;ANXA1	MAP1LC3A;FOXO1;PRKAA1;MET;STAT6;KLF4	FOXO1;STAT6;KLF4;MAP1LC3A;MET	EZH2;KLF4	4		5			6
GO_LYMPHOCYTE_ACTIVATION_INVOLVED_IN_IMMUNE_RESPONSE	1.612	6.124	2.054	1.508	2.292	1.485	2.502	4.613	3.452	2.344	3.358		2.487	3.379	2.666	3.118	2.305	1.723		TP53;ANXA1		GATA3;STAT3;MTOR;ANXA1;TP53;STAT6		STAT3;GATA3	MTOR;STAT6	STAT6;STAT3;MTOR		STAT6;MTOR		STAT6;STAT3;MTOR	MTOR;STAT6;TP53;ANXA1	STAT3;MTOR;ANXA1;TP53;STAT6		TP53;STAT3;ANXA1	MTOR;STAT6;TP53;ANXA1;STAT3		STAT6;TP53;ANXA1	ANXA1;STAT6;TP53;GATA3;MTOR	TP53;STAT6;MTOR;ANXA1	STAT6;TP53;STAT3;ANXA1	STAT6;GATA3;MTOR	MTOR;STAT6		2		6		2	2
GO_REGULATION_OF_REACTIVE_OXYGEN_SPECIES_METABOLIC_PROCESS	2.603	6.112	3.181	4.571	6.748	7.071	5.909	4.608	10.31	3.311	7.573		2.482	7.625	9.293	4.13	5.464	6.449		PDGFRB;TP53;PTGS2		EGFR;CAV1;CDKN1A;STAT3;MTOR;TP53	CAV1;TP53	EGFR;STAT3;CAV1	MTOR;FOXO1;CDKN1A;HDAC4;KLF4	KLF4;STAT3;MTOR;EGFR;HDAC4;CAV1;FOXO1		FOXO1;HDAC4;MTOR;EGFR;CDKN1A;KLF4;CAV1		FOXO1;CAV1;MTOR;EGFR;STAT3;HDAC4	CDKN1A;MTOR;EGFR;TP53	KLF4;FOXO1;HDAC4;PDGFRB;STAT3;HK2;MTOR;CDKN1A;EGFR;PTGS2;TP53	TP53;CAV1	PTGS2;PDGFRB;TP53;STAT3	MTOR;PDGFRB;KLF4;HDAC4;FOXO1;CDKN1A;TP53;PTGS2;STAT3		PTGS2;PDGFRB;TP53	PTGS2;CDKN1A;FOXO1;HDAC4;CAV1;PDGFRB;TP53;KLF4;MTOR	CDKN1A;FOXO1;MTOR;PDGFRB;CAV1;HDAC4;KLF4;TP53;PTGS2;EGFR	HK2;PDGFRB;TP53;PTGS2;STAT3	FOXO1;CAV1;CDKN1A;HDAC4;MTOR;KLF4	MTOR;FOXO1;HDAC4;KLF4;CDKN1A;EGFR		3		6	2	3	5
GO_EMBRYO_DEVELOPMENT_ENDING_IN_BIRTH_OR_EGG_HATCHING	2.669	6.092	5.652	6.641	5.169	7.574	4.859	2.004	10.343	2.924	9.005		3.189	15.288	9.784	2.641	12.482	8.924	3.327	BRCA2;TP53;FGFR1;PDGFRB;MED1		EGFR;PDGFRA;NCOA1;ATM;GATA3;SMAD2;TP53;ITGB1;BCL2L1		EGFR;PDGFRA;SMAD2;GATA3;ATM;NCOA1;BCL2L1	NCOA1;PDGFRA;SMAD2;TSC2;PRKDC;CTNNB1;ITGB1;NOTCH1;MAP2K1;LRP6	TSC2;SMAD2;MED1;NCOA1;ATM;LRP6;CASP3;EGFR;ITGB1		PRKDC;MAP2K1;EGFR;ATM;TSC2;NCOA1;CTNNB1;ITGB1;NOTCH1;LRP6;SMAD2		CASP3;EGFR;TSC2;SMAD2;NCOA1;MED1;ATM;LRP6	EGFR;TP53;ITGB1	PHGDH;PRKDC;CTNNB1;PDGFRA;FGFR1;NCOA1;TSC2;BRCA2;PDGFRB;MAP2K1;CASP3;LRP6;EGFR;NOTCH1;ITGB1;TP53;ZEB1		PDGFRB;TP53;BRCA2;CASP3;PHGDH;FGFR1	NCOA1;BRCA2;PRKDC;PDGFRB;MAP2K1;PHGDH;ITGB1;TP53;FGFR1;TSC2;NOTCH1;SMAD2;PDGFRA;CTNNB1;CASP3;LRP6		FGFR1;TP53;PHGDH;BRCA2;PDGFRB;CASP3	EP300;PHGDH;LRP6;PDGFRB;TP53;ZEB1;AR;TSC2;MAP2K1;MED1;GATA3;CASP3;PRKDC;TWIST1;NCOA1;CTNNB1;SMAD2;ITGB1;BRCA2;FGFR1;PDGFRA;NOTCH1	ATM;CTNNB1;NCOA1;NOTCH1;LRP6;SMAD2;PDGFRB;MAP2K1;MED1;TSC2;BRCA2;ITGB1;FGFR1;TP53;PRKDC;EGFR	PDGFRB;FGFR1;TP53;BRCA2;PHGDH;CASP3	CTNNB1;PDGFRA;MAP2K1;EP300;PRKDC;LRP6;TWIST1;ZEB1;ITGB1;AR;TSC2;SMAD2;NOTCH1;GATA3;MED1;NCOA1	NOTCH1;PDGFRA;NCOA1;ITGB1;MAP2K1;PRKDC;LRP6;CTNNB1;TSC2;EGFR;ZEB1	MED1;ITGB1;SMAD2;TSC2	5		9		7	10
GO_B_CELL_ACTIVATION	2.061	6.091	2.65	5.723	6.474	6.842	4.737	3.863	6.988	3.47	8.885		3.683	7.872	7.231	4.12	6.453	4.145	2.036	BAD;TP53;ITGA4		BAD;KIT;CDKN1A;ATM;TP53;ITGB1;STAT6	BAD;TP53	ATM;BAD;KIT	BAX;PRKDC;BAK1;CDKN1A;HDAC4;ITGB1;STAT6	ATM;BAK1;CASP3;KIT;ITGB1;HDAC4;STAT6;BAD		HDAC4;BAX;BAD;PRKDC;STAT6;ATM;CDKN1A;ITGB1		CASP3;KIT;STAT6;HDAC4;BAD;ATM	CDKN1A;STAT6;TP53;ITGB1	PRKDC;HDAC4;BAD;KIT;CASP3;CDKN1A;ITGB1;STAT6;TP53;ITGA4		TP53;CASP3;ITGA4;BAD;KIT	BAD;PRKDC;STAT6;ITGA4;HDAC4;ITGB1;CDKN1A;TP53;BAK1;KIT;BAX;CASP3		BAD;STAT6;TP53;KIT;CASP3	BAD;BAX;EP300;KIT;CDKN1A;CASP3;HDAC4;PRKDC;STAT6;TP53;ITGB1	CDKN1A;ATM;STAT6;BAX;HDAC4;ITGA4;BAD;ITGB1;TP53;PRKDC	STAT6;TP53;BAD;CASP3;ITGA4;KIT	EP300;PRKDC;ITGB1;CDKN1A;BAX;BAD;STAT6;HDAC4	HDAC4;ITGB1;STAT6;PRKDC;CDKN1A	ITGB1;BAK1	3		7	2	3	7
GO_MITOCHONDRION_ORGANIZATION	5.018	6.063	2.232	2.936	7.299	3.7	4.786	4.37	9.221	6.347	8.914		5.72	9.001	7.548	9.053	4.289		3.67	STAT2;TP53;JUN;ATG7;BAD;MAPK8;ATG3		BAD;PRKAA1;STAT3;TP53;JUN;SQSTM1;MAP1LC3B;BCL2L1	SQSTM1;BAD;TP53	BAD;STAT3;BCL2L1	BAX;PRKAA1;TSC2;MAP1LC3A;BAK1	TSC2;MAP1LC3B;BECN1;STAT3;ATG3;KDR;MAPK8;BAK1;YWHAZ;BAD		ATG12;MAP1LC3A;BAX;BAD;TSC2;PRKAA1		BAD;TSC2;MAPK8;ATG3;KDR;STAT3;BECN1	JUN;MAP1LC3B;PRKAA1;TP53;SQSTM1	KDR;BAD;JUN;MAP1LC3A;STAT2;STAT3;TSC2;HK2;ATG3;SQSTM1;MAPK8;ATG12;TP53;ATG7	TP53;SQSTM1	TP53;KDR;STAT2;ATG3;MAPK8;BAD;ATG7;STAT3;JUN	BAD;STAT2;ATG3;ATG7;MAP1LC3A;KDR;TP53;TSC2;BAK1;PRKAA1;JUN;STAT3;MAPK8;BAX		STAT2;ATG7;BAD;TP53;ATG3;KDR;MAPK8;JUN	BAD;MAP1LC3A;BAX;EP300;ATG7;JUN;TSC2;SQSTM1;ATG3;MAPK8;TP53;STAT2;KDR;PRKAA1	ATG3;ATG12;MAPK8;BAX;PRKAA1;JUN;MAP1LC3A;BAD;TSC2;STAT2;ATG7;TP53	ATG7;HK2;ATG3;MAPK8;KDR;ATG12;BAD;TP53;STAT3;SQSTM1;STAT2;JUN	EP300;MAP1LC3A;TSC2;PRKAA1;BAX;BAD;SQSTM1		MAP1LC3B;BAK1;TSC2;YWHAZ	7		8	3	3	5
GO_REGULATION_OF_PEPTIDE_TRANSPORT	3.401	6.058	3.594		3.509	1.704	3.184	3.785	2.985	4.433	4.104		3.173	3.481	3.782	3.299	1.528			TP53;ANXA1;BAD;MAPK8;SRC;PTGS2		BAD;EGFR;ERBB2;HDAC3;SOCS1;PRKAA1;STAT3;ANXA1;TP53	BAD;TP53;ERBB2	EGFR;BAD;STAT3;ERBB2;HDAC3		STAT3;MAPK8;EGFR;ERBB2;YWHAZ;HDAC3;BAD		ERBB2;PRKAA1;BAD;EGFR		ERBB2;EGFR;MAPK8;HDAC3;STAT3;BAD	SOCS1;ANXA1;PRKAA1;TP53;EGFR	HDAC3;BAD;EGFR;STAT3;MAPK8;ANXA1;PTGS2;TP53	TP53;ERBB2	PTGS2;TP53;ANXA1;HDAC3;MAPK8;BAD;STAT3;SRC	BAD;ERBB2;TP53;PTGS2;ANXA1;PRKAA1;HDAC3;STAT3;MAPK8;SRC		ANXA1;BAD;TP53;SRC;PTGS2;MAPK8	BAD;PTGS2;TNFSF11;SRC;ANXA1;MAPK8;TP53;ERBB2;PRKAA1	ERBB2;ANXA1;MAPK8;PRKAA1;SRC;BAD;TP53;PTGS2;EGFR	MAPK8;TP53;BAD;PTGS2;HDAC3;STAT3;ANXA1	ERBB2;TNFSF11;PRKAA1;BAD			6		9	3	5
GO_POSITIVE_REGULATION_OF_COLD_INDUCED_THERMOGENESIS		6.005	2.478	1.967	5.477	3.068	4.407	3.946	2.418	1.874	3.374			2.377	3.536	2.834	2.951					HDAC3;CAV1;IGF1R;PRKAB1;STAT6		CAV1;HDAC3	SIRT6;STAT6	PRKAB1;STAT6;SIRT6;CAV1;HDAC3		SIRT6;STAT6;CAV1		STAT6;HDAC3;CAV1;SIRT6	STAT6;IGF1R;PRKAB1	HDAC3;STAT6;KDM1A		KDM1A;HDAC3	SIRT6;STAT6;HDAC3;KDM1A			SIRT6;STAT6;CAV1	SIRT6;STAT6;CAV1;KDM1A	STAT6;HDAC3;KDM1A	STAT6;SIRT6;CAV1					5		2	2
GO_INTRINSIC_APOPTOTIC_SIGNALING_PATHWAY_IN_RESPONSE_TO_DNA_DAMAGE	4.517	5.985	3.802	5.708	4.124	7.194	3.133	2.545	7.118	5.515	9.8		4.33	8.409	10.258	5.227	6.897	3.409		BAD;TP53;BRCA2;KDM1A		BAD;CDKN1A;ATM;TP53;BCL2L1	BAD;TP53	ATM;BAD;BCL2L1	BAX;CHEK2;PRKDC;BAK1;CDKN1A	CHEK2;ATM;BAD;BAK1		CHEK2;BAD;BAX;PRKDC;ATM;CDKN1A		BAD;CHEK2;ATM	CDKN1A;TP53	PRKDC;BAD;BRCA2;KDM1A;CHEK2;CDKN1A;TP53		KDM1A;TP53;BRCA2;BAD;CHEK2	BAD;CHEK2;BRCA2;PRKDC;CDKN1A;TP53;BAK1;BAX;KDM1A		CHEK2;BAD;TP53;BRCA2	BAD;BAX;EP300;CDKN1A;PRKDC;CHEK2;TP53;BRCA2	CDKN1A;ATM;KDM1A;BAX;BAD;BRCA2;TP53;PRKDC;CHEK2	KDM1A;TP53;BRCA2;CHEK2;BAD	EP300;PRKDC;CDKN1A;BAX;BAD;CHEK2	CDKN1A;CHEK2;PRKDC		4		5	2	3	5
GO_NEGATIVE_REGULATION_OF_TOR_SIGNALING		5.982	3.112	4.1	3.949	5.768	4.141	3.188	2.164		4.776			4.79	6.53		3.951					PRKAA1;AKT1S1;DEPTOR;ATM		ATM;DEPTOR	PRKAA1;TSC2;AKT1S1	TSC2;ATM;DEPTOR		ATM;TSC2;AKT1S1;PRKAA1		DEPTOR;ATM;TSC2	PRKAA1;AKT1S1	TSC2;DEPTOR			AKT1S1;TSC2;PRKAA1;DEPTOR			DEPTOR;PRKAA1;TSC2;AKT1S1	ATM;DEPTOR;PRKAA1;TSC2;AKT1S1		AKT1S1;PRKAA1;TSC2					4		2	3
GO_POSITIVE_REGULATION_OF_TRANSPORT	4.276	5.971	3.947	3.878	6.673	5.408	4.795	3.266	5.963	5.123	8.804		3.947	8.069	8.763	3.904	4.933	2.407	2.133	TP53;ANXA1;PDGFRB;BAD;MAPK8;FGFR1;SRC;PTGS2		BAD;EGFR;ERBB2;CAV1;HDAC3;PRKAA1;STAT3;ANXA1;TP53;ITGB1	CAV1;BAD;TP53;ERBB2	EGFR;BAD;STAT3;ERBB2;CAV1;HDAC3	BAX;BRAF;PRKAA1;ERBB2;BAK1;MAP2K6;ITGB1;NFKBIA	STAT3;MAP2K6;BAK1;MAPK8;NFKBIA;EGFR;ITGB1;ERBB2;YWHAZ;CAV1;HDAC3;BAD		MAP2K6;BAX;BAD;ERBB2;CAV1;EGFR;ITGB1;NFKBIA;PRKAA1;BRAF		ERBB2;MAP2K6;CAV1;EGFR;MAPK8;HDAC3;STAT3;BAD;NFKBIA	ANXA1;PRKAA1;TP53;EGFR;ITGB1	HDAC3;BRAF;MAP2K6;FGFR1;BAD;MAPK8;PDGFRB;STAT3;NFKBIA;EGFR;ITGB1;PTGS2;TP53;ANXA1	TP53;ERBB2;CAV1	PTGS2;PDGFRB;TP53;ANXA1;HDAC3;MAPK8;BAD;STAT3;SRC;FGFR1	BAD;PDGFRB;ERBB2;MAP2K6;BRAF;NFKBIA;ITGB1;TP53;FGFR1;PTGS2;BAK1;ANXA1;PRKAA1;HDAC3;STAT3;MAPK8;BAX;SRC		ANXA1;BAD;TP53;SRC;MAPK8;PTGS2;PDGFRB;FGFR1	BAD;PTGS2;BAX;TNFSF11;SRC;MAP2K6;NFKBIA;BRAF;ANXA1;CAV1;MAPK8;PDGFRB;TP53;ITGB1;FGFR1;ERBB2;PRKAA1	ERBB2;ANXA1;MAPK8;PDGFRB;PRKAA1;SRC;CAV1;BAX;NFKBIA;BAD;BRAF;MAP2K6;ITGB1;FGFR1;TP53;PTGS2;EGFR	PDGFRB;MAPK8;FGFR1;TP53;BAD;PTGS2;HDAC3;STAT3;ANXA1	NFKBIA;ITGB1;BRAF;MAP2K6;CAV1;ERBB2;TNFSF11;BAX;PRKAA1;BAD	ITGB1;EGFR;BRAF;MAP2K6;NFKBIA	ITGB1;BAK1;YWHAZ	8		10	4	6	8
GO_POSITIVE_REGULATION_OF_CHROMATIN_ORGANIZATION	3.232	5.969	3.793	1.952	4.111	3.048	3.127	2.539	4.547	2.966	4.45		3.112	5.687	5.92	3.956	2.931			TP53;DNMT3B;KDM1A		DNMT1;GATA3;ATM;DNMT3B;TP53		ATM;DNMT1;GATA3	CTNNB1;SIRT6	ATM;DNMT1;SIRT6;DNMT3B		SIRT6;ATM;CTNNB1		SIRT6;ATM;DNMT1	TP53;DNMT3B	CTNNB1;KDM1A;DNMT1;TP53;DNMT3B		KDM1A;TP53;DNMT3B	SIRT6;DNMT3B;TP53;CTNNB1;KDM1A		DNMT1;TP53;DNMT3B	DNMT1;DNMT3B;CTNNB1;TP53;SIRT6;GATA3	DNMT3B;ATM;CTNNB1;KDM1A;SIRT6;TP53	DNMT3B;KDM1A;TP53;DNMT1	CTNNB1;SIRT6;GATA3			3		5		3	2
GO_POSITIVE_REGULATION_OF_ENDOTHELIAL_CELL_PROLIFERATION	4.501	5.969	2.464	1.952	5.438	3.048	5.802	3.923	8.482	6.936	8.304		4.319	6.998	7.285	8.105	2.931			FGFR1;STAT5A;JUN;ITGA4		RPTOR;STAT3;MTOR;JUN;STAT5A		RPTOR;STAT3	MTOR;SIRT6	STAT3;MTOR;KDR;RPTOR;SIRT6		SIRT6;RPTOR;MTOR		RPTOR;MTOR;KDR;STAT3;SIRT6	JUN;MTOR;STAT5A	KDR;FGFR1;JUN;STAT3;MTOR;RPTOR;STAT5A;ITGA4		STAT5A;KDR;ITGA4;STAT3;JUN;FGFR1	MTOR;SIRT6;ITGA4;STAT5A;KDR;FGFR1;JUN;STAT3		KDR;FGFR1;STAT5A;JUN	FGFR1;JUN;STAT5A;KDR;SIRT6;MTOR;RPTOR	MTOR;ITGA4;SIRT6;JUN;STAT5A;RPTOR;FGFR1	RPTOR;FGFR1;KDR;STAT5A;STAT3;ITGA4;JUN	SIRT6;RPTOR;MTOR			4		5		2	2
GO_REGULATION_OF_DNA_METABOLIC_PROCESS	4.83	5.966	3.634	7.98	5.235	9.182	4.632	3.8	10.067	4.326	12.14		4.568	11.021	14.199	5.975	7.455	5.191		PIK3CA;TP53;KDM1A;PDGFRB;SRC;MYC		EGFR;CDKN1A;ATM;GATA3;TP53;CHEK1;STAT6	CHEK1;ATR;TP53	EGFR;ATM;CHEK1;GATA3	SIRT6;BAX;ATR;PRKDC;CTNNB1;CDKN1A;KLF4;STAT6;CHEK1	KLF4;CHEK1;PIK3CA;ATM;EGFR;STAT6;SIRT6		BAX;SIRT6;PRKDC;STAT6;EGFR;ATM;CDKN1A;CHEK1;CTNNB1;KLF4		CHEK1;STAT6;EGFR;PIK3CA;SIRT6;ATM	CDKN1A;EGFR;STAT6;TP53	PRKDC;KLF4;CTNNB1;MYC;PDGFRB;KDM1A;CHEK1;ATR;PIK3CA;CDKN1A;EGFR;TP53;STAT6	TP53;CHEK1;ATR	KDM1A;PDGFRB;TP53;PIK3CA;MYC;SRC	ATR;SIRT6;STAT6;PDGFRB;PRKDC;KLF4;CHEK1;KDM1A;MYC;CDKN1A;TP53;PIK3CA;CTNNB1;BAX;SRC		CHEK1;PIK3CA;STAT6;TP53;SRC;PDGFRB	BAX;TWIST1;SRC;CDKN1A;PIK3CA;CHEK1;PRKDC;CTNNB1;STAT6;PDGFRB;TP53;KLF4;SIRT6;GATA3	CDKN1A;ATM;CTNNB1;KDM1A;STAT6;PDGFRB;BAX;SRC;SIRT6;TP53;MYC;KLF4;CHEK1;PRKDC;PIK3CA;EGFR	PIK3CA;STAT6;PDGFRB;KDM1A;TP53;MYC;CHEK1;ATR	CTNNB1;PRKDC;TWIST1;CDKN1A;BAX;GATA3;SIRT6;STAT6;KLF4	STAT6;PRKDC;KLF4;CTNNB1;CDKN1A;EGFR		6		7	3	4	9
GO_PEPTIDYL_SERINE_MODIFICATION	4.826	5.959	4.742	10.565	11.332	14.824	10.846	2.707	13.708	8.81	17.251		9.289	14.696	19.597	10.782	8.673	6.37		PIK3CA;ULK1;AURKA;MAPK8;SRC;PTGS2		EGFR;RPS6KB1;CAV1;PRKAA1;RPTOR;ATM;MTOR	RPTOR;CAV1;CHUK;ATR	EGFR;ATM;RPS6KB1;RPTOR;CAV1	BAX;BRAF;PRKAA1;ATR;RET;CHEK2;PRKDC;PTEN;RPS6KB1;MTOR;BAK1	PIK3CA;ATM;MTOR;BAK1;MAPK8;IKBKB;EGFR;RPTOR;CHEK2;RPS6KB1;ILK;CAV1		CHEK2;ILK;BAX;PRKDC;RPTOR;CAV1;MTOR;EGFR;ATM;RPS6KB1;RET;PTEN;PRKAA1;BRAF		RPS6KB1;RPTOR;CAV1;CHEK2;EGFR;MAPK8;MTOR;PIK3CA;ILK;IKBKB;ATM	MTOR;EGFR;PRKAA1	PRKDC;IKBKB;BRAF;EGFR;ULK1;CHUK;MTOR;RPTOR;CHEK2;PIK3CA;RET;ATR;AURKA;MAPK8;PTGS2;RPS6KB1	ATR;CAV1;CHUK;RPTOR	PTGS2;RPS6KB1;CHUK;PIK3CA;MAPK8;ULK1;SRC;AURKA;CHEK2;IKBKB	AURKA;ATR;CHEK2;BRAF;RET;CHUK;PRKAA1;PTEN;BAX;MTOR;PRKDC;RPS6KB1;IKBKB;PTGS2;BAK1;PIK3CA;MAPK8;ULK1;SRC		IKBKB;PIK3CA;SRC;RPS6KB1;ULK1;RET;AURKA;CHEK2;PTGS2;MAPK8	RPS6KB1;PTGS2;BAX;SRC;PIK3CA;BRAF;CAV1;PRKDC;AURKA;MAPK8;CHEK2;ULK1;RET;PRKAA1;IKBKB;MTOR;RPTOR	ATM;ILK;PRKAA1;BRAF;PRKDC;MTOR;CAV1;RPTOR;PIK3CA;MAPK8;SRC;AURKA;RET;PTGS2;EGFR;ULK1;BAX;RPS6KB1;PTEN;CHEK2	PIK3CA;RPTOR;IKBKB;ULK1;MAPK8;CHUK;RPS6KB1;CHEK2;PTGS2;ATR;AURKA;RET	PRKDC;RPTOR;BRAF;RPS6KB1;RET;CAV1;PRKAA1;BAX;CHEK2;MTOR	MTOR;CHEK2;PRKDC;RET;BRAF;RPS6KB1;EGFR		6		7	4	5	11
GO_REGULATION_OF_CHROMOSOME_ORGANIZATION	8.417	5.937	4.733	2.653	7.45	2.614	6.87	1.687	11.187	7.57	9.722		8.003	10.956	10.36	10.742	3.28			RB1;TP53;KDM1A;PHF2;MAPK8;MKI67;SRC;DNMT3B;MYC		DNMT1;ATM;GATA3;DNMT3B;TP53;CHEK1;PHF8	CHEK1;ATR;TP53	GATA3;ATM;CHEK1;PHF8;DNMT1	ATR;CTNNB1;SIRT6;CHEK1	BECN1;CHEK1;PHF8;DNMT3B;RB1;ATM;MAPK8;DNMT1;SIRT6		SIRT6;ATM;CTNNB1;CHEK1		CHEK1;MAPK8;DNMT1;RB1;PHF8;BECN1;SIRT6;ATM	TP53;DNMT3B	CTNNB1;SETD1A;MYC;PHF2;KDM5A;KDM1A;MKI67;CHEK1;ATR;MAPK8;DNMT1;DNMT3B;TP53;RB1	TP53;CHEK1;ATR	KDM1A;TP53;MKI67;PHF2;MAPK8;MYC;SRC;RB1;DNMT3B	MKI67;ATR;SIRT6;PHF2;RB1;DNMT3B;CHEK1;KDM1A;MYC;TP53;MAPK8;CTNNB1;SRC		CHEK1;TP53;SRC;RB1;MKI67;DNMT1;DNMT3B;MAPK8;PHF2	PHF2;DNMT1;DNMT3B;TWIST1;SRC;CHEK1;RB1;KDM5A;MAPK8;TP53;CTNNB1;SIRT6;GATA3;MKI67	DNMT3B;ATM;CTNNB1;PHF2;KDM1A;MAPK8;SRC;SIRT6;TP53;MKI67;MYC;CHEK1;RB1	MKI67;DNMT3B;MAPK8;PHF2;KDM1A;TP53;RB1;MYC;CHEK1;SETD1A;ATR;DNMT1	CTNNB1;TWIST1;KDM5A;SIRT6;GATA3			9		7	3	5	4
GO_REGULATION_OF_TRANSPORT	3.241	5.937	3.41	6.896	7.627	8.434	6.344	3.661	7.074	3.619	10.151		2.924	10.265	10.551	3.143	8.378	4.322	2.21	TP53;ANXA1;PDGFRB;BAD;MAPK8;FGFR1;SRC;ATG3;PTGS2		BAD;EGFR;ERBB2;CAV1;HDAC3;SOCS1;PRKAA1;STAT3;MTOR;ANXA1;ERBB3;TP53;ITGB1	CAV1;BAD;TP53;ERBB2	EGFR;BAD;STAT3;ERBB2;ERBB3;CAV1;HDAC3	BAX;BRAF;PRKAA1;TSC2;ERBB2;PTEN;MTOR;BAK1;MAP2K6;ITGB1;NOTCH1;MAP2K1;CTNNB1;SIRT6;NFKBIA	TSC2;STAT3;ATG3;SIRT6;MTOR;BAK1;MAPK8;NFKBIA;MAP2K6;EGFR;ITGB1;ERBB2;YWHAZ;ERBB3;CAV1;HDAC3;BAD		NFKBIA;MAP2K6;BAD;BAX;SIRT6;ERBB2;MAP2K1;CAV1;MTOR;EGFR;TSC2;PTEN;CTNNB1;ITGB1;NOTCH1;PRKAA1;BRAF		ERBB3;ERBB2;MAP2K6;CAV1;TSC2;MAPK8;EGFR;MTOR;HDAC3;ATG3;STAT3;NFKBIA;BAD;SIRT6	SOCS1;ANXA1;MTOR;PRKAA1;TP53;EGFR;ITGB1	PDGFRB;MAP2K1;TP53;NFKBIA;EGFR;NOTCH1;BRAF;STAT3;ATG3;MAPK8;ITGB1;HDAC3;CTNNB1;MAP2K6;FGFR1;BAD;TSC2;HK2;MTOR;ANXA1;PTGS2	TP53;ERBB2;CAV1	PTGS2;PDGFRB;TP53;ANXA1;ATG3;HDAC3;MAPK8;BAD;STAT3;SRC;FGFR1	ATG3;PDGFRB;NFKBIA;BRAF;ITGB1;TP53;PRKAA1;HDAC3;PTEN;CTNNB1;BAX;MTOR;SIRT6;MAP2K6;ERBB2;FGFR1;TSC2;STAT3;NOTCH1;PTGS2;BAK1;MAPK8;BAD;MAP2K1;ANXA1;SRC		ANXA1;BAD;TP53;SRC;MAPK8;ATG3;PTGS2;PDGFRB;FGFR1	FGFR1;BAX;ATG3;PDGFRB;TP53;PRKAA1;SRC;TSC2;MAP2K1;CAV1;PTGS2;TNFSF11;MTOR;BAD;ERBB3;TWIST1;MAP2K6;NFKBIA;BRAF;ANXA1;CTNNB1;MAPK8;ITGB1;SIRT6;ERBB2;NOTCH1	ERBB2;CTNNB1;PDGFRB;PRKAA1;SIRT6;BRAF;TSC2;ITGB1;FGFR1;ANXA1;MTOR;CAV1;NOTCH1;ATG3;MAPK8;SRC;MAP2K1;MAP2K6;PTGS2;EGFR;BAX;NFKBIA;BAD;PTEN;TP53	HK2;PDGFRB;ATG3;MAPK8;FGFR1;BAD;TP53;PTGS2;HDAC3;ANXA1;STAT3	CTNNB1;NFKBIA;MAP2K1;ERBB3;TWIST1;ITGB1;BRAF;TSC2;MAP2K6;CAV1;ERBB2;TNFSF11;NOTCH1;BAX;PRKAA1;BAD;SIRT6;MTOR	MTOR;NOTCH1;ITGB1;MAP2K1;EGFR;BRAF;CTNNB1;TSC2;MAP2K6;NFKBIA	ITGB1;BAK1;TSC2;YWHAZ	9		13	4	7	15
GO_NEGATIVE_REGULATION_OF_CELL_POPULATION_PROLIFERATION	5.961	5.937	4.465	10.801	12.357	13.131	11.136	1.955	12.05	6.044	17.008		4.664	18.236	19.421	5.511	13.399	6.482	4.259	RB1;BRCA2;TP53;JUN;STAT1;MED1;PTGS2;MYC;KAT2B		ERBB2;CDKN1A;CAV1;ATM;GATA3;STAT3;SMAD2;TP53;JUN	CAV1;TP53;ERBB2	SMAD2;GATA3;ATM;STAT3;ERBB2;CAV1	BAX;SMAD2;TSC2;ERBB2;PTEN;CDKN1B;BAK1;CTNNB1;HDAC4;KLF4;MAP2K1;NOTCH1;CDKN1A;SIRT6	TSC2;SMAD2;KLF4;MED1;STAT3;RB1;ATM;CDKN1B;CTBP2;BAK1;CASP3;ILK;HDAC4;ERBB2;SIRT6;CAV1		ILK;HDAC4;BAX;SIRT6;ERBB2;MAP2K1;CAV1;CDKN1B;ATM;TSC2;CDKN1A;PTEN;CTNNB1;KLF4;NOTCH1;SMAD2		CASP3;CDKN1B;ERBB2;CAV1;TSC2;ILK;CTBP2;RB1;STAT3;HDAC4;MED1;SIRT6;ATM;SMAD2	CDKN1A;JUN;TP53	HDAC4;MAP2K1;KAT2B;TP53;STAT1;NOTCH1;ZEB1;RB1;KLF4;MYC;JUN;BRCA2;STAT3;CASP3;CTNNB1;TSC2;CDKN1B;CDKN1A;PTGS2	TP53;ERBB2;CAV1	PTGS2;TP53;BRCA2;CASP3;KAT2B;MYC;STAT3;STAT1;JUN;RB1	BRCA2;HDAC4;TP53;CDKN1B;STAT1;PTEN;BAX;CTNNB1;CASP3;SIRT6;ERBB2;MYC;TSC2;JUN;STAT3;KAT2B;NOTCH1;PTGS2;BAK1;SMAD2;RB1;KLF4;MAP2K1;CDKN1A		STAT1;TP53;RB1;BRCA2;KAT2B;PTGS2;CASP3;JUN	BAX;HDAC4;RB1;TP53;ZEB1;CDKN1B;KAT2B;AR;TSC2;MAP2K1;CAV1;MED1;GATA3;PTGS2;CASP3;JUN;CDKN1A;CTNNB1;SMAD2;KLF4;STAT1;BRCA2;SIRT6;ERBB2;NOTCH1	ERBB2;ATM;CTNNB1;ILK;HDAC4;SIRT6;TSC2;MYC;CDKN1A;CAV1;MED1;KAT2B;NOTCH1;MAP2K1;BRCA2;CDKN1B;PTGS2;SMAD2;STAT1;BAX;JUN;KLF4;PTEN;TP53;RB1	STAT1;KAT2B;TP53;BRCA2;RB1;MYC;PTGS2;CASP3;STAT3;JUN	CTNNB1;ZEB1;MAP2K1;AR;TSC2;CAV1;ERBB2;CDKN1A;SMAD2;NOTCH1;GATA3;BAX;SIRT6;HDAC4;MED1;CDKN1B;KLF4	NOTCH1;HDAC4;MAP2K1;KLF4;CDKN1B;CTNNB1;TSC2;CDKN1A;ZEB1	SMAD2;MED1;TSC2;KLF4;BAK1	9		9	3	6	14
GO_RESPONSE_TO_ALKALOID	4.475	5.936		3.045	4.079	4.256	3.106	5.416	7.045	5.455	8.243		4.292	6.941	7.229	5.165	2.907	2.16		CASP7;RELA;DNMT3B;ATG7		PRKAA1;DNMT3B;MTOR;BCL2L1;RELA			PRKAA1;MTOR;MAP1LC3A	CASP3;DNMT3B;MTOR;RELA		RELA;MAP1LC3A;MTOR;PRKAA1		CASP3;MTOR;RELA	RELA;MTOR;PRKAA1;DNMT3B	CASP7;RELA;MAP1LC3A;MTOR;CASP3;DNMT3B;ATG7		CASP3;CASP7;RELA;ATG7;DNMT3B	MTOR;DNMT3B;MAP1LC3A;ATG7;CASP7;PRKAA1;RELA;CASP3		CASP7;ATG7;DNMT3B;CASP3	MAP1LC3A;DNMT3B;ATG7;CASP3;PRKAA1;CASP7;MTOR	DNMT3B;MTOR;PRKAA1;RELA;MAP1LC3A;CASP7;ATG7	ATG7;DNMT3B;CASP3;RELA;CASP7	PRKAA1;MTOR;MAP1LC3A	MTOR;MAP1LC3A		4		5			3
GO_REGULATION_OF_CELL_DEVELOPMENT	4.215	5.885	3.061	6.3	8.457	9.112	5.578	3.221	12.753	5.847	12.246		3.879	13.329	11.344	5.275	11.497	8.6	3.779	TP53;FGFR1;KDM1A;BAD;RELA;AURKA;MED1;DNMT3B		BAD;KIT;NCOA1;VIM;GATA3;DNMT3B;STAT3;MTOR;TP53;RELA	RELA;BAD;TP53	GATA3;BAD;NCOA1;STAT3;KIT	NCOA1;VIM;RET;PTEN;PRKDC;MTOR;CTNNB1;HDAC4;KLF4;MAP2K1;NOTCH1	KLF4;MED1;STAT3;DNMT3B;NCOA1;VIM;MTOR;IKBKB;KIT;RELA;HDAC4;ILK;EZH2;BAD		ILK;HDAC4;BAD;VIM;RELA;PRKDC;MAP2K1;MTOR;NCOA1;RET;PTEN;CTNNB1;KLF4;NOTCH1		KIT;NCOA1;MTOR;ILK;IKBKB;STAT3;RELA;HDAC4;BAD;MED1	VIM;MTOR;RELA;DNMT3B;TP53	HDAC4;VIM;RELA;MAP2K1;TP53;PRKDC;KDM1A;YAP1;AURKA;NOTCH1;ZEB1;KLF4;IKBKB;KIT;STAT3;RET;DNMT3B;CTNNB1;FGFR1;NCOA1;BAD;MTOR	TP53;RELA	KDM1A;TP53;RELA;BAD;STAT3;AURKA;ALK;KIT;FGFR1;DNMT3B;IKBKB	AURKA;HDAC4;RET;TP53;PTEN;CTNNB1;VIM;NCOA1;MTOR;PRKDC;FGFR1;ALK;STAT3;IKBKB;NOTCH1;BAD;DNMT3B;KLF4;MAP2K1;RELA;KIT;KDM1A		IKBKB;BAD;TP53;KIT;DNMT3B;RET;AURKA;FGFR1	EP300;HDAC4;TP53;ZEB1;MAP2K1;HDAC1;MED1;GATA3;DNMT3B;TNFSF11;KIT;PRKDC;AURKA;MTOR;BAD;VIM;NCOA1;CTNNB1;KLF4;RET;FGFR1;IKBKB;NOTCH1	DNMT3B;NCOA1;CTNNB1;ILK;HDAC4;FGFR1;PRKDC;KDM1A;MTOR;MED1;NOTCH1;RELA;MAP2K1;AURKA;RET;VIM;BAD;KLF4;PTEN;TP53	IKBKB;DNMT3B;FGFR1;KDM1A;BAD;TP53;RELA;STAT3;AURKA;RET;KIT	CTNNB1;EP300;MAP2K1;PRKDC;ZEB1;HDAC1;RET;TNFSF11;GATA3;NOTCH1;BAD;HDAC4;MED1;NCOA1;MTOR;VIM;KLF4	MTOR;NOTCH1;NCOA1;HDAC4;MAP2K1;RET;PRKDC;KLF4;VIM;CTNNB1;YAP1;ZEB1	MED1;EZH2;DNMT3B;KLF4;VIM	8		10	3	5	11
GO_DEVELOPMENTAL_PROCESS_INVOLVED_IN_REPRODUCTION	5.021	5.883	5.829	9.251	6.559	10.142	6.488	1.649	12.747	5.046	14.204		5.482	16.391	14.375	4.539	11.494	8.6		SMARCC1;BRCA2;ANXA1;PDGFRB;BAD;AURKA;MED1;SRC;PTGS2		BAD;EGFR;PDGFRA;KIT;NCOA1;GATA3;ATM;MTOR;ANXA1;BCL2L1		EGFR;PDGFRA;GATA3;ATM;BAD;NCOA1;BCL2L1;KIT	NCOA1;ESR1;BAX;IDH1;PDGFRA;PRKDC;PTEN;MTOR;BAK1;CDKN1B;CTNNB1;NOTCH1;MAP2K1;LRP6	MED1;NCOA1;PIAS1;CDKN1B;ATM;LRP6;BAK1;MTOR;CASP3;EGFR;KIT;BAD		BAX;BAD;PRKDC;PTEN;MAP2K1;MTOR;CDKN1B;EGFR;ATM;PGR;NCOA1;IDH1;CTNNB1;NOTCH1;LRP6		CASP3;CDKN1B;KIT;PIAS1;EGFR;MTOR;NCOA1;BAD;MED1;ATM;LRP6	MTOR;EGFR;ANXA1	SMARCC1;PDGFRB;MAP2K1;LRP6;PRKDC;AURKA;EGFR;NOTCH1;KIT;KDM5A;BRCA2;CASP3;ESR1;CTNNB1;PDGFRA;NCOA1;BAD;MTOR;CDKN1B;ANXA1;PTGS2;PIAS1		SMARCC1;PTGS2;PDGFRB;ANXA1;BRCA2;CASP3;BAD;SRC;AURKA;KIT	AURKA;BRCA2;PDGFRB;CDKN1B;PDGFRA;PTEN;CTNNB1;BAX;CASP3;NCOA1;MTOR;PRKDC;LRP6;IDH1;NOTCH1;PTGS2;BAK1;ESR1;BAD;MAP2K1;ANXA1;SMARCC1;KIT;SRC		ANXA1;BAD;SMARCC1;SRC;KIT;BRCA2;AURKA;PTGS2;PDGFRB;CASP3	BAX;LRP6;PDGFRB;CDKN1B;ESR1;AR;SRC;MAP2K1;KDM5A;MED1;GATA3;PTGS2;KIT;CASP3;PRKDC;AURKA;MTOR;BAD;SMARCC1;NCOA1;ANXA1;CTNNB1;IDH1;BRCA2;PDGFRA;NOTCH1	ATM;CTNNB1;NCOA1;PDGFRB;PRKDC;ANXA1;MTOR;MED1;SMARCC1;PGR;NOTCH1;LRP6;IDH1;SRC;MAP2K1;AURKA;BRCA2;CDKN1B;PTGS2;EGFR;BAX;BAD;PTEN	PIAS1;PDGFRB;SMARCC1;BAD;BRCA2;PTGS2;CASP3;ANXA1;AURKA;KIT	ESR1;PDGFRA;MAP2K1;PRKDC;CTNNB1;LRP6;AR;KDM5A;NOTCH1;GATA3;BAX;BAD;MED1;NCOA1;CDKN1B;IDH1;MTOR	MTOR;NOTCH1;ESR1;NCOA1;PDGFRA;KDM5A;MAP2K1;PRKDC;CDKN1B;LRP6;CTNNB1;EGFR		9		10		8	14
GO_NEGATIVE_REGULATION_OF_CELL_SIZE		5.871		5.679	3.504	5.712	3.629	4.164	3.171		7.055			4.993	7.247		3.525					MTOR;DEPTOR;AKT1S1			MTOR;AKT1S1;PTEN	DEPTOR;MTOR		MTOR;AKT1S1;PTEN		DEPTOR;MTOR	MTOR;AKT1S1	DEPTOR;MTOR			MTOR;DEPTOR;PTEN;AKT1S1			DEPTOR;AKT1S1;MTOR	AKT1S1;PTEN;MTOR;DEPTOR		AKT1S1;MTOR					3			3
GO_RAS_PROTEIN_SIGNAL_TRANSDUCTION	2.829	5.865	1.599	3.475	2.415	2.576	1.864	4.944	7.67	3.319	6.443		3.553	6.496	4.937	4.864	3.232	3.041		PDGFRB;TP53;JUN;RB1		CDKN1A;MET;DNMT1;TP53;JUN;SQSTM1;ITGB1	SQSTM1;CHUK;TP53	MET;DNMT1	MET;SHC1;CDKN1A;ITGB1;NOTCH1	RB1;MET;DNMT1;ITGB1		ITGB1;MET;CDKN1A;NOTCH1		RB1;MET;DNMT1	JUN;CDKN1A;TP53;SQSTM1;ITGB1	JUN;MET;CHUK;PDGFRB;SQSTM1;CDKN1A;DNMT1;ITGB1;TP53;RB1;NOTCH1	TP53;SQSTM1;CHUK	PDGFRB;TP53;CHUK;JUN;RB1	RB1;PDGFRB;MET;ITGB1;CDKN1A;TP53;CHUK;SHC1;NOTCH1;JUN		TP53;RB1;DNMT1;PDGFRB;JUN	DNMT1;JUN;CDKN1A;SQSTM1;RB1;PDGFRB;TP53;ITGB1;MET;NOTCH1	CDKN1A;MET;PDGFRB;JUN;ITGB1;TP53;RB1;NOTCH1	PDGFRB;CHUK;TP53;RB1;DNMT1;SQSTM1;JUN	ITGB1;CDKN1A;NOTCH1;MET;SQSTM1	NOTCH1;CDKN1A;MET;ITGB1		4		7	3	2	5
GO_POSITIVE_REGULATION_OF_LYMPHOCYTE_ACTIVATION	2.826	5.858	2.558	1.815	2.413	3.437	2.686	3.743	3.121	2.481	3.77		3.55	6.486	4.93	2.274	5.113	2.13		BAD;SRC;ANXA1;PIK3CA		BAD;CDKN1A;CAV1;SOCS1;GATA3;ANXA1;STAT6	CAV1;BAD	BAD;CAV1;GATA3	CDKN1A;STAT6;PRKDC	PIK3CA;STAT6;CAV1;BAD		BAD;PRKDC;STAT6;CDKN1A;CAV1		BAD;CAV1;STAT6;PIK3CA	CDKN1A;STAT6;SOCS1;ANXA1	PRKDC;BAD;PIK3CA;CDKN1A;ANXA1;STAT6		BAD;PIK3CA;SRC;ANXA1	BAD;PRKDC;STAT6;CDKN1A;ANXA1;PIK3CA;SRC		ANXA1;PIK3CA;BAD;STAT6;SRC	BAD;TNFSF11;SRC;CDKN1A;PIK3CA;CAV1;PRKDC;ANXA1;STAT6;GATA3	CDKN1A;ANXA1;STAT6;CAV1;SRC;BAD;PRKDC;PIK3CA	PIK3CA;STAT6;BAD;ANXA1	PRKDC;CAV1;CDKN1A;TNFSF11;GATA3;BAD;STAT6	STAT6;CDKN1A;PRKDC		4		7	2	3	3
GO_MUSCLE_CELL_PROLIFERATION	4.6	5.855	3.063	9.549	7.738	12.513	6.942	4.445	18.286	5.3	14.928		5.554	13.614	17.199	6.116	7.706	12.21		JUN;PDGFRB;STAT1;FGFR1;PTGS2		EGFR;CDKN1A;DNMT1;STAT3;MTOR;JUN		EGFR;DNMT1;STAT3	PRKDC;PTEN;MTOR;CTNNB1;CDKN1B;HDAC4;KLF4;NOTCH1;CDKN1A	KLF4;STAT3;CDKN1B;MTOR;EGFR;DNMT1;HDAC4;ILK		ILK;HDAC4;PRKDC;CDKN1B;MTOR;EGFR;CDKN1A;PTEN;CTNNB1;KLF4;NOTCH1		CDKN1B;MTOR;EGFR;DNMT1;ILK;STAT3;HDAC4	CDKN1A;JUN;EGFR;MTOR	PRKDC;KLF4;HDAC4;CTNNB1;FGFR1;JUN;PDGFRB;STAT3;MTOR;CDKN1B;YAP1;CDKN1A;EGFR;DNMT1;STAT1;PTGS2;NOTCH1		PTGS2;PDGFRB;STAT3;JUN;FGFR1;STAT1	MTOR;PRKDC;PDGFRB;KLF4;HDAC4;CDKN1A;CDKN1B;STAT1;PTGS2;FGFR1;NOTCH1;JUN;STAT3;PTEN;CTNNB1		STAT1;DNMT1;PTGS2;PDGFRB;FGFR1;JUN	DNMT1;PTGS2;CDKN1B;JUN;FGFR1;CDKN1A;HDAC4;PRKDC;CTNNB1;PDGFRB;STAT1;KLF4;MTOR;NOTCH1	CDKN1A;CTNNB1;ILK;FGFR1;NOTCH1;MTOR;CDKN1B;PDGFRB;STAT1;HDAC4;JUN;KLF4;PTEN;PRKDC;PTGS2;EGFR	PDGFRB;STAT1;FGFR1;PTGS2;STAT3;DNMT1;JUN	CTNNB1;PRKDC;CDKN1B;CDKN1A;NOTCH1;HDAC4;MTOR;KLF4	MTOR;NOTCH1;HDAC4;EGFR;PRKDC;KLF4;CDKN1B;CTNNB1;CDKN1A;YAP1		5		6		3	9
GO_REGULATION_OF_CELL_ADHESION	3.274	5.853	4.42	3.708	6.755	8.321	6.542	1.926	4.783	4.254	7.692		3.774	8.655	9.329	3.852	6.716	2.06		PIK3CA;ANXA1;BAD;SRC;RELA;ITGA4		BAD;ERBB2;CAV1;SOCS1;GATA3;ATM;ANXA1;ERBB3;RELA	CAV1;RELA;BAD;ERBB2	GATA3;ATM;BAD;ERBB2;ERBB3;CAV1	JAK1;ERBB2;RET;ITGA5;PTEN;KLF4;NOTCH1	KLF4;PIK3CA;ATM;KDR;CASP3;ILK;RELA;ERBB2;ERBB3;CAV1;BAD		ILK;BAD;ITGA5;RELA;ERBB2;CAV1;ATM;RET;PTEN;KLF4;NOTCH1;JAK1		CASP3;ERBB3;ERBB2;CAV1;PIK3CA;ILK;KDR;RELA;BAD;ATM	RELA;SOCS1;ANXA1	KLF4;KDR;BAD;ITGA5;RELA;CASP3;PIK3CA;RET;NOTCH1;ANXA1;ITGA4	ERBB2;CAV1;RELA	KDR;ANXA1;CASP3;PIK3CA;ITGA4;RELA;BAD;SRC	BAD;KLF4;ERBB2;ITGA4;RET;KDR;JAK1;ITGA5;NOTCH1;ANXA1;PIK3CA;RELA;PTEN;CASP3;SRC		ANXA1;PIK3CA;BAD;SRC;RET;KDR;CASP3	BAD;ERBB3;TNFSF11;SRC;CASP3;PIK3CA;JAK1;CAV1;ANXA1;KDR;ITGA5;RET;KLF4;ERBB2;GATA3;NOTCH1	ERBB2;ANXA1;ATM;ITGA5;ILK;CAV1;RELA;ITGA4;SRC;KLF4;BAD;JAK1;RET;PTEN;PIK3CA;NOTCH1	PIK3CA;KDR;BAD;CASP3;RELA;ANXA1;ITGA4;RET	ERBB3;JAK1;RET;CAV1;ERBB2;TNFSF11;NOTCH1;GATA3;BAD;ITGA5;KLF4	KLF4;NOTCH1;ITGA5;RET		6		9	4	6	7
GO_REGULATION_OF_PROTEIN_SERINE_THREONINE_KINASE_ACTIVITY	3.913	5.847	4.014	8.698	9.246	12.305	8.95	3.188	10.899	6.088	14.971		6.544	15.091	16.01	5.613	9.168	6.325		CCNC;RB1;PDGFRB;FGFR1;SRC;KAT2B		EGFR;ERBB2;KIT;CDKN1A;CAV1;PRKAA1;RPTOR;IGF1R	RPTOR;CAV1;ERBB2	EGFR;RPTOR;ERBB2;KIT;CAV1	SHC1;BRAF;PRKAA1;ERBB2;RET;PTEN;CDKN1B;MAP2K6;CDKN1A;MAP2K1;LRP6	RB1;CDKN1B;LRP6;CASP3;KIT;EGFR;RPTOR;EZH2;ERBB2;ILK;CAV1;MAP2K6		ILK;MAP2K6;ERBB2;RPTOR;MAP2K1;CDKN1B;EGFR;CAV1;CDKN1A;RET;PTEN;LRP6;PRKAA1;BRAF		CASP3;CDKN1B;ERBB2;MAP2K6;RPTOR;CAV1;EGFR;ILK;RB1;KIT;LRP6	CDKN1A;EGFR;PRKAA1;IGF1R	BRAF;MAP2K6;FGFR1;KIT;PDGFRB;MAP2K1;CASP3;CCNC;KAT2B;RET;CDKN1B;RPTOR;LRP6;CDKN1A;EGFR;RB1	ERBB2;CAV1;RPTOR	PDGFRB;CASP3;KAT2B;CCNC;SRC;ALK;KIT;FGFR1;RB1	PDGFRB;BRAF;RET;CDKN1B;PRKAA1;PTEN;CASP3;MAP2K6;ERBB2;FGFR1;ALK;LRP6;KAT2B;SHC1;RB1;MAP2K1;CDKN1A;CCNC;KIT;SRC		SRC;KIT;RB1;CASP3;RET;KAT2B;CCNC;PDGFRB;FGFR1	LRP6;RB1;CCNC;PDGFRB;PRKAA1;CDKN1B;KAT2B;SRC;MAP2K1;CAV1;RPTOR;TNFSF11;KIT;CASP3;MAP2K6;CDKN1A;BRAF;RET;FGFR1;ERBB2	ERBB2;ILK;PDGFRB;PRKAA1;BRAF;FGFR1;CDKN1A;CAV1;KAT2B;RPTOR;LRP6;SRC;MAP2K1;CCNC;MAP2K6;RET;CDKN1B;EGFR;PTEN;RB1	RPTOR;PDGFRB;FGFR1;CCNC;KAT2B;RB1;CASP3;RET;KIT	MAP2K1;RPTOR;LRP6;MAP2K6;BRAF;RET;CAV1;ERBB2;CDKN1A;TNFSF11;PRKAA1;CDKN1B	MAP2K1;RET;BRAF;CDKN1B;LRP6;MAP2K6;CDKN1A;EGFR		6		8	3	5	11
GO_CELL_AGING	2.004	5.845	2.418	10.208	5.304	11.878	5.659	3.855	9.694	2.896	10.98		4.225	9.566	13.072	5.078	6.716	6.112		TP53;BRCA2		CDKN1A;ATM;MTOR;TP53;CHEK1	CHEK1;ATR;TP53	ATM;CHEK1	ATR;CHEK2;PRKDC;PTEN;MTOR;CDKN1A;MAP2K1;CHEK1	CHEK1;ATM;MTOR;CHEK2;ILK		CHEK2;ILK;PRKDC;MAP2K1;MTOR;ATM;CDKN1A;PTEN;CHEK1		CHEK1;CHEK2;MTOR;ILK;ATM	CDKN1A;MTOR;TP53	PRKDC;BRCA2;MTOR;MAP2K1;CHEK1;CHEK2;ATR;CDKN1A;TP53	TP53;CHEK1;ATR	CHEK2;TP53;BRCA2	MTOR;ATR;CHEK2;BRCA2;PRKDC;CHEK1;MAP2K1;CDKN1A;TP53;PTEN		CHEK2;CHEK1;TP53;BRCA2	TWIST1;CDKN1A;MAP2K1;CHEK1;PRKDC;CHEK2;TP53;BRCA2;MTOR	CDKN1A;ATM;ILK;MTOR;MAP2K1;TP53;BRCA2;PTEN;CHEK1;PRKDC;CHEK2	TP53;BRCA2;CHEK2;CHEK1;ATR	MAP2K1;PRKDC;TWIST1;CDKN1A;CHEK2;MTOR	MTOR;CHEK2;MAP2K1;PRKDC;CDKN1A		2		5	3	2	8
GO_REGULATION_OF_MAPK_CASCADE	2.54	5.843	4.415	9.491	7.732	10.495	5.552	2.76	9.83	5.069	14.471		3.765	12.484	12.313	3.843	9.758	7.479	2.37	JUN;PDGFRB;FGFR1;SRC;MYC		EGFR;PDGFRA;ERBB2;KIT;HDAC3;CAV1;PRKAA1;JUN;IGF1R	CAV1;ERBB2	EGFR;PDGFRA;ERBB2;KIT;CAV1;HDAC3	PDGFRA;SHC1;BRAF;PRKAA1;ERBB2;RET;PTEN;FOXO1;MAP2K6;CTNNB1;KLF4;NOTCH1;MAP2K1	KLF4;MAP2K6;KDR;EGFR;KIT;EZH2;ERBB2;YWHAZ;ILK;CAV1;HDAC3;FOXO1		ILK;MAP2K6;FOXO1;ERBB2;MAP2K1;CAV1;EGFR;RET;PTEN;CTNNB1;KLF4;NOTCH1;PRKAA1;BRAF		FOXO1;ERBB2;MAP2K6;CAV1;EGFR;ILK;HDAC3;KDR;KIT	JUN;EGFR;PRKAA1;IGF1R	KLF4;FOXO1;HDAC3;PDGFRA;FGFR1;MYC;JUN;KIT;BRAF;PDGFRB;KDR;CTNNB1;MAP2K1;RET;MAP2K6;EGFR;NOTCH1	ERBB2;CAV1	PDGFRB;KDR;HDAC3;MYC;SRC;JUN;ALK;KIT;FGFR1	PDGFRB;BRAF;RET;PRKAA1;HDAC3;PDGFRA;PTEN;CTNNB1;MAP2K6;ERBB2;MYC;FGFR1;ALK;JUN;KDR;NOTCH1;SHC1;KLF4;MAP2K1;FOXO1;KIT;SRC		SRC;KIT;RET;KDR;PDGFRB;FGFR1;JUN	FGFR1;PDGFRB;KDR;PRKAA1;AR;SRC;MAP2K1;FOXO1;CAV1;TNFSF11;KIT;JUN;MAP2K6;BRAF;CTNNB1;RET;KLF4;PDGFRA;ERBB2;NOTCH1	ERBB2;CTNNB1;ILK;FOXO1;PDGFRB;PRKAA1;BRAF;MYC;FGFR1;CAV1;NOTCH1;SRC;MAP2K1;MAP2K6;RET;EGFR;JUN;KLF4;PTEN	PDGFRB;FGFR1;KDR;MYC;HDAC3;RET;KIT;JUN	CTNNB1;PDGFRA;MAP2K1;MAP2K6;BRAF;AR;RET;FOXO1;CAV1;ERBB2;TNFSF11;NOTCH1;PRKAA1;KLF4	NOTCH1;PDGFRA;FOXO1;MAP2K1;EGFR;RET;KLF4;BRAF;CTNNB1;MAP2K6	EZH2;KLF4;YWHAZ	5		9	2	6	13
GO_NEGATIVE_REGULATION_OF_MULTICELLULAR_ORGANISMAL_PROCESS	4.271	5.835	3.41	7.018	7.151	6.872	6.354	3.626	10.643	3.532	10.153		3.271	11.114	11.191	3.72	7.957	7.499	1.874	BRCA2;RB1;TP53;FGFR1;ANXA1;STAT1;MED1;PTGS2;MYC		EGFR;PDGFRA;ERBB2;SOCS1;VIM;DNMT1;GATA3;STAT3;MTOR;ANXA1;TP53		EGFR;PDGFRA;GATA3;STAT3;ERBB2;DNMT1	PDGFRA;VIM;ERBB2;PTEN;MTOR;MAP2K6;CDKN1B;FOXO1;KLF4;HDAC4;NOTCH1;CTNNB1;NFKBIA	KLF4;MED1;STAT3;VIM;CDKN1B;MTOR;NFKBIA;EGFR;DNMT1;HDAC4;ERBB2;RB1;MAP2K6;FOXO1		FOXO1;MAP2K6;HDAC4;VIM;ERBB2;MTOR;CDKN1B;EGFR;PTEN;CTNNB1;KLF4;NOTCH1;NFKBIA		CDKN1B;ERBB2;MAP2K6;FOXO1;EGFR;MTOR;DNMT1;RB1;MED1;STAT3;HDAC4;NFKBIA	SOCS1;VIM;ANXA1;MTOR;TP53;EGFR	HDAC4;VIM;TP53;FOXO1;NFKBIA;STAT1;EGFR;NOTCH1;RB1;KLF4;MYC;BRCA2;STAT3;DNMT1;CTNNB1;PDGFRA;FGFR1;MAP2K6;MTOR;CDKN1B;ANXA1;PTGS2	TP53;ERBB2	PTGS2;TP53;ANXA1;BRCA2;MYC;STAT3;FGFR1;STAT1;RB1	BRCA2;HDAC4;NFKBIA;TP53;CDKN1B;STAT1;PDGFRA;PTEN;CTNNB1;VIM;MTOR;MAP2K6;ERBB2;MYC;FGFR1;STAT3;NOTCH1;PTGS2;RB1;KLF4;FOXO1;ANXA1		STAT1;ANXA1;TP53;RB1;DNMT1;BRCA2;PTGS2;FGFR1	HDAC4;RB1;TP53;DNMT1;CDKN1B;FOXO1;MED1;GATA3;PTGS2;MTOR;TWIST1;MAP2K6;VIM;NFKBIA;ANXA1;CTNNB1;KLF4;STAT1;BRCA2;FGFR1;PDGFRA;ERBB2;NOTCH1	ERBB2;CTNNB1;FOXO1;HDAC4;MYC;FGFR1;ANXA1;MTOR;MED1;NOTCH1;MAP2K6;BRCA2;VIM;CDKN1B;PTGS2;EGFR;STAT1;NFKBIA;KLF4;PTEN;TP53;RB1	STAT1;FGFR1;TP53;BRCA2;RB1;MYC;PTGS2;ANXA1;DNMT1;STAT3	CTNNB1;PDGFRA;NFKBIA;TWIST1;CDKN1B;MAP2K6;FOXO1;ERBB2;NOTCH1;GATA3;HDAC4;MED1;MTOR;VIM;KLF4	MTOR;NOTCH1;PDGFRA;FOXO1;HDAC4;EGFR;KLF4;VIM;CDKN1B;CTNNB1;MAP2K6;NFKBIA	MED1;KLF4;VIM	9		11		6	13
GO_INTERACTION_WITH_HOST	3.478	5.828	5.561	4.336	4.071	6.725	3.332	2.017	6.185	3.134	7.125		3.323	8.353	8.775	2.033	6.39	4.866		BAD;SRC;ULK1;ATG7		BAD;EGFR;CAV1;MET;ITGB1;BCL2L1	CAV1;BAD	EGFR;MET;BAD;BCL2L1;CAV1	CLDN1;MET;ITGA5;CTNNB1;ITGB1	EGFR;ITGB1;MET;CAV1;BAD		BAD;ITGA5;EGFR;CTNNB1;ITGB1;MET;CAV1		BAD;CAV1;MET;EGFR	EGFR;ITGB1	CTNNB1;BAD;MET;ULK1;ITGA5;EGFR;ITGB1;ATG7		BAD;ULK1;ATG7;SRC	BAD;CLDN1;ATG7;MET;ULK1;ITGB1;ITGA5;CTNNB1;SRC		ATG7;BAD;SRC;ULK1	BAD;ATG7;SRC;CAV1;CLDN1;CTNNB1;ITGA5;ITGB1;MET;ULK1	MET;ITGA5;CTNNB1;ULK1;CAV1;SRC;BAD;ITGB1;ATG7;EGFR	ATG7;ULK1;BAD	CTNNB1;ITGB1;CAV1;CLDN1;MET;BAD;ITGA5	ITGB1;EGFR;CTNNB1;ITGA5;MET		4		6	2	5	5
GO_VASCULATURE_DEVELOPMENT	4.875	5.786	4.381	11.741	9.775	9.278	6.465	1.905	13.768	5.872	17.658		6.384	17.765	14.358	7.154	10.781	6.331	4.184	PIK3CA;FGFR1;ANXA1;JUN;PDGFRB;STAT1;MED1;PTGS2		PDGFRA;ERBB2;KIT;CAV1;DNMT1;STAT3;ANXA1;JUN;ITGB1	CAV1;ERBB2	PDGFRA;CAV1;STAT3;ERBB2;KIT;DNMT1	BAX;PDGFRA;SHC1;JAK1;ERBB2;ITGA5;PTEN;FOXO1;BAK1;CTNNB1;ITGB1;KLF4;MAP2K1;NOTCH1;SIRT6	KLF4;MED1;STAT3;PIK3CA;KDR;BAK1;KIT;DNMT1;ITGB1;ERBB2;YWHAZ;SIRT6;CAV1;FOXO1		FOXO1;ITGB1;BAX;ITGA5;SIRT6;ERBB2;MAP2K1;CAV1;PTEN;CTNNB1;KLF4;NOTCH1;JAK1		FOXO1;ERBB2;CAV1;DNMT1;PIK3CA;MED1;KDR;STAT3;KIT;SIRT6	JUN;ANXA1;ITGB1	PDGFRB;MAP2K1;FOXO1;ITGA5;YAP1;STAT1;NOTCH1;KLF4;KDR;JUN;KIT;STAT3;PIK3CA;DNMT1;ITGB1;CTNNB1;PDGFRA;FGFR1;HK2;ANXA1;PTGS2	ERBB2;CAV1	PTGS2;PDGFRB;KDR;ANXA1;PIK3CA;STAT3;JUN;KIT;FGFR1;STAT1	PDGFRB;ITGB1;JAK1;STAT1;PDGFRA;PTEN;CTNNB1;BAX;SIRT6;ERBB2;FGFR1;ITGA5;JUN;STAT3;KDR;NOTCH1;PTGS2;SHC1;BAK1;PIK3CA;KLF4;MAP2K1;FOXO1;ANXA1;KIT		STAT1;ANXA1;PIK3CA;KIT;DNMT1;KDR;PTGS2;PDGFRB;FGFR1;JUN	FGFR1;BAX;PDGFRB;KDR;DNMT1;PIK3CA;MAP2K1;CAV1;FOXO1;ITGA5;MED1;PTGS2;KIT;JAK1;TWIST1;JUN;ANXA1;CTNNB1;ITGB1;KLF4;STAT1;SIRT6;PDGFRA;ERBB2;NOTCH1	ERBB2;CTNNB1;FOXO1;PDGFRB;SIRT6;JAK1;ITGB1;FGFR1;ANXA1;ITGA5;CAV1;MED1;PIK3CA;NOTCH1;MAP2K1;PTGS2;STAT1;BAX;JUN;KLF4;PTEN	PIK3CA;HK2;PDGFRB;STAT1;FGFR1;KDR;PTGS2;DNMT1;ANXA1;STAT3;KIT;JUN	CTNNB1;PDGFRA;MAP2K1;TWIST1;JAK1;ITGB1;FOXO1;CAV1;ERBB2;NOTCH1;BAX;SIRT6;MED1;ITGA5;KLF4	NOTCH1;PDGFRA;FOXO1;ITGB1;MAP2K1;KLF4;CTNNB1;ITGA5;YAP1	ITGB1;MED1;KLF4;BAK1;YWHAZ	8		9	2	6	15
GO_REGULATION_OF_CELLULAR_LOCALIZATION	3.398	5.783	3.841	3.731	5.579	5.215	3.845	3.179	4.344	3.475	6.87		2.493	6.194	7.569	3.111	4.74	1.654	2.08	RB1;TP53;KDM1A;BAD;MAPK8;SRC;PTGS2		BAD;EGFR;ERBB2;CAV1;HDAC3;PRKAA1;TP53;SQSTM1;ITGB1;BCL2L1	CAV1;SQSTM1;BAD;ERBB2;TP53	EGFR;BAD;ERBB2;BCL2L1;CAV1;HDAC3	BAX;PRKAA1;ERBB2;PTEN;BAK1;CTNNB1;ITGB1;MAP2K1	BECN1;BAK1;MAPK8;EGFR;ITGB1;ERBB2;YWHAZ;RB1;CAV1;HDAC3;BAD		BAX;BAD;ERBB2;MAP2K1;CAV1;EGFR;PTEN;CTNNB1;ITGB1;PRKAA1		ERBB2;BAD;CAV1;EGFR;MAPK8;HDAC3;RB1;BECN1	PRKAA1;TP53;EGFR;SQSTM1;ITGB1	HDAC3;CTNNB1;BAD;EGFR;KDM1A;MAP2K1;SQSTM1;MAPK8;ITGB1;PTGS2;TP53;RB1	TP53;SQSTM1;ERBB2;CAV1	PTGS2;KDM1A;TP53;HDAC3;MAPK8;BAD;SRC;RB1	BAD;RB1;MAP2K1;ERBB2;ITGB1;KDM1A;TP53;PTGS2;BAK1;MAPK8;PRKAA1;HDAC3;PTEN;CTNNB1;BAX;SRC		BAD;TP53;SRC;RB1;PTGS2;MAPK8	BAD;PTGS2;BAX;AR;SRC;SQSTM1;MAP2K1;CAV1;RB1;MAPK8;CTNNB1;TP53;ITGB1;ERBB2;PRKAA1	ERBB2;CTNNB1;KDM1A;MAPK8;CAV1;PRKAA1;SRC;MAP2K1;BAX;BAD;PTGS2;ITGB1;PTEN;TP53;RB1;EGFR	MAPK8;KDM1A;TP53;RB1;BAD;PTGS2;HDAC3;SQSTM1	CTNNB1;MAP2K1;AR;ITGB1;CAV1;ERBB2;PRKAA1;BAX;BAD;SQSTM1	ITGB1;EGFR;MAP2K1;CTNNB1	ITGB1;BAK1;YWHAZ	7		10	5	6	8
GO_CIRCADIAN_RHYTHM	3.446	5.771	1.939	3.228	4.031	4.246	3.298	5.721	7.222	4.114	7.041		3.285	8.261	7.464	3.847	5.127	3.651		TP53;JUN;ATG7;MAPK8		EGFR;HDAC3;PRKAA1;MTOR;JUN;TP53		EGFR;HDAC3	PRKDC;PRKAA1;MTOR;PTEN	MTOR;MAPK8;EGFR;EZH2;HDAC3		PRKDC;MTOR;EGFR;PTEN;PRKAA1		EGFR;HDAC3;MTOR;MAPK8	JUN;MTOR;PRKAA1;TP53;EGFR	PRKDC;HDAC3;JUN;EGFR;KDM5A;MTOR;MAPK8;TP53;ATG7		TP53;HDAC3;MAPK8;ATG7;JUN	MTOR;ATG7;PRKDC;TP53;PRKAA1;JUN;HDAC3;PTEN;MAPK8		ATG7;MAPK8;TP53;JUN	EP300;JUN;ATG7;PRKDC;HDAC1;KDM5A;MAPK8;TP53;PRKAA1;MTOR	MAPK8;MTOR;PRKAA1;JUN;ATG7;PTEN;TP53;PRKDC;EGFR	ATG7;MAPK8;TP53;HDAC3;JUN	EP300;PRKDC;HDAC1;KDM5A;PRKAA1;MTOR	MTOR;KDM5A;EGFR;PRKDC		4		6		2	4
GO_RESPONSE_TO_METAL_ION	3.653	5.714	3.506	4.334	4.986	6.404	5.478	3.668	8.481	6.123	10.401		5.386	9.369	8.801	5.692	4.976	2.965		FOS;JUN;BAD;MAPK8;PTGS2		BAD;EGFR;KIT;CAV1;FOS;PRKAA1;JUN	CAV1;FOS;CHUK;BAD	EGFR;BAD;CAV1;KIT	CLDN1;BRAF;PRKAA1;MAP1LC3A;PTEN;CDKN1B	CDKN1B;MAPK8;CASP3;EGFR;KIT;CAV1;BAD		MAP1LC3A;BAD;CAV1;CDKN1B;EGFR;PTEN;PRKAA1;BRAF		CASP3;CDKN1B;KIT;CAV1;EGFR;MAPK8;BAD	JUN;EGFR;PRKAA1;FOS	BRAF;BAD;KIT;MAP1LC3A;JUN;CHUK;FOS;CASP3;EGFR;CDKN1B;MAPK8;PTGS2	FOS;CAV1;CHUK	PTGS2;FOS;CHUK;CASP3;MAPK8;BAD;JUN;KIT	BAD;MAP1LC3A;CLDN1;BRAF;CHUK;CDKN1B;PTGS2;MAPK8;PRKAA1;JUN;KIT;PTEN;FOS;CASP3		BAD;KIT;FOS;PTGS2;MAPK8;CASP3;JUN	BAD;MAP1LC3A;PTGS2;CDKN1B;JUN;KIT;CASP3;BRAF;CAV1;FOS;MAPK8;CLDN1;PRKAA1	MAPK8;CDKN1B;CAV1;FOS;PRKAA1;JUN;MAP1LC3A;BAD;BRAF;PTEN;PTGS2;EGFR	FOS;MAPK8;CHUK;BAD;PTGS2;CASP3;KIT;JUN	MAP1LC3A;BRAF;CAV1;PRKAA1;CLDN1;BAD;CDKN1B	MAP1LC3A;BRAF;EGFR;CDKN1B		5		7	4	4	6
GO_SECRETION	2.399	5.683	5.386	1.585	3.866	3.051	4.581	1.762	2.683	2.355	3.389		2.144	5.031	4.431	2.005	3.829			FGFR1;ANXA1;ATG7;BAD;STAT5A;MED1;SRC		BAD;EGFR;KIT;CAV1;NCOA1;SOCS1;GATA3;STAT3;SMAD2;ANXA1;ERBB3;STAT5A		EGFR;SMAD2;GATA3;BAD;NCOA1;STAT3;ERBB3;KIT;CAV1	NCOA1;IDH1;SMAD2;GLS;MAP2K6;NOTCH1	SMAD2;MED1;STAT3;NCOA1;CTBP2;EGFR;KIT;ERBB3;CAV1;MAP2K6;BAD		MAP2K6;BAD;CAV1;EGFR;NCOA1;IDH1;NOTCH1;GLS;SMAD2		ERBB3;MAP2K6;KIT;CAV1;EGFR;NCOA1;CTBP2;STAT3;BAD;MED1;SMAD2	EGFR;SOCS1;ANXA1;STAT5A	MAP2K6;NCOA1;FGFR1;BAD;KIT;STAT3;HK2;STAT5A;EGFR;NOTCH1;ANXA1;ATG7		STAT5A;ANXA1;BAD;ATG7;STAT3;SRC;KIT;FGFR1	NCOA1;BAD;ATG7;MAP2K6;GLS;STAT5A;IDH1;FGFR1;NOTCH1;SMAD2;ANXA1;STAT3;KIT;SRC		ANXA1;ATG7;BAD;SRC;KIT;FGFR1;STAT5A	BAD;ERBB3;ATG7;TNFSF11;SRC;KIT;MAP2K6;NCOA1;CAV1;ANXA1;SMAD2;IDH1;STAT5A;MED1;FGFR1;GATA3;NOTCH1	ANXA1;NCOA1;NOTCH1;SMAD2;IDH1;GLS;CAV1;SRC;MED1;BAD;MAP2K6;STAT5A;ATG7;FGFR1;EGFR	ATG7;HK2;FGFR1;STAT5A;BAD;ANXA1;STAT3;KIT	ERBB3;MAP2K6;CAV1;TNFSF11;NOTCH1;SMAD2;GATA3;BAD;MED1;NCOA1;IDH1			7		12		9	6
GO_INFLAMMATORY_RESPONSE	3.177	5.674	3.402	2.211	5.621	3.515	5.39	3.582	8.585	5.754	7.405		3.663	6.651	5.551	5.239	3.232	3.467		RB1;ANXA1;FOS;JUN;RELA;PTGS2		EGFR;KIT;FOS;ATM;GATA3;STAT3;ANXA1;JUN;RELA	RELA;FOS;CHUK	EGFR;GATA3;ATM;STAT3;KIT	ESR1;KLF4;HDAC4;NOTCH1;NFKBIA	KLF4;STAT3;ATM;NFKBIA;IKBKB;EGFR;KIT;RELA;HDAC4;RB1		HDAC4;RELA;EGFR;ATM;KLF4;NOTCH1;NFKBIA		EGFR;RB1;IKBKB;STAT3;RELA;HDAC4;KIT;NFKBIA;ATM	JUN;ANXA1;RELA;EGFR;FOS	KLF4;IKBKB;HDAC4;JUN;KIT;RELA;CHUK;STAT3;NFKBIA;FOS;ESR1;EGFR;NOTCH1;ANXA1;PTGS2;RB1	FOS;CHUK;RELA	PTGS2;FOS;ANXA1;CHUK;RELA;STAT3;JUN;KIT;RB1;IKBKB	RELA;RB1;KLF4;HDAC4;NFKBIA;IKBKB;CHUK;NOTCH1;PTGS2;ANXA1;JUN;STAT3;FOS;KIT;ESR1		IKBKB;ANXA1;RB1;KIT;FOS;PTGS2;JUN	PTGS2;ESR1;JUN;TNFSF11;KIT;NFKBIA;HDAC4;ANXA1;RB1;FOS;KLF4;GATA3;IKBKB;NOTCH1	ANXA1;ATM;NOTCH1;FOS;RELA;HDAC4;JUN;NFKBIA;PTGS2;KLF4;RB1;EGFR	IKBKB;FOS;CHUK;RB1;PTGS2;RELA;ANXA1;STAT3;KIT;JUN	ESR1;NFKBIA;TNFSF11;NOTCH1;GATA3;HDAC4;KLF4	NOTCH1;ESR1;HDAC4;KLF4;EGFR;NFKBIA		6		9	3	5	5
GO_PEPTIDYL_LYSINE_MODIFICATION	4.588	5.662	3.481	5.316	8.262	5.269	6.554	2.592	12.966	5.052	10.297		3.423	10.37	8.718	9	7.059	3.863	1.931	EHMT2;BRCA2;KDM1A;RELA;DNMT3B;KAT2B		NCOA1;PRKAA1;DNMT1;GATA3;DNMT3B;CHEK1;RELA	CHEK1;RELA	CHEK1;NCOA1;DNMT1;GATA3	NCOA1;CREBBP;PRKAA1;ASH2L;CTNNB1;HDAC4;CHEK1	CHEK1;NCOA3;DNMT3B;NCOA1;PIAS1;CREBBP;DNMT1;RELA;HDAC4;EZH2		HDAC4;RELA;CREBBP;NCOA1;CHEK1;CTNNB1;PRKAA1		CHEK1;PIAS1;NCOA3;DNMT1;RELA;HDAC4;NCOA1;CREBBP	RELA;PRKAA1;DNMT3B	SETD1A;HDAC4;NCOA1;CTNNB1;RELA;BRCA2;KDM1A;CHEK1;KAT2B;CREBBP;ASH2L;DNMT1;NCOA3;EHMT2;DNMT3B;PIAS1	CHEK1;RELA	KDM1A;EHMT2;BRCA2;RELA;KAT2B;NCOA3;DNMT3B	NCOA1;ASH2L;EHMT2;BRCA2;DNMT3B;NCOA3;CHEK1;HDAC4;KAT2B;CREBBP;PRKAA1;RELA;CTNNB1;KDM1A		CHEK1;DNMT1;DNMT3B;BRCA2;KAT2B	DNMT1;DNMT3B;CREBBP;EP300;KAT2B;TWIST1;ASH2L;NCOA1;HDAC4;CHEK1;CTNNB1;BRCA2;PRKAA1;GATA3	DNMT3B;EHMT2;CTNNB1;NCOA1;KDM1A;PRKAA1;RELA;HDAC4;KAT2B;BRCA2;CREBBP;CHEK1	PIAS1;NCOA3;DNMT3B;KDM1A;KAT2B;BRCA2;CHEK1;SETD1A;RELA;DNMT1;EHMT2	ASH2L;CTNNB1;EP300;TWIST1;CREBBP;PRKAA1;GATA3;HDAC4;NCOA1	ASH2L;NCOA1;HDAC4;CREBBP;CTNNB1	EZH2;DNMT3B	6		7	2	4	7
GO_HISTONE_H3_K9_MODIFICATION	5.598	5.654	4.541	2.47	5.223	2.459	3.903		7.526	5.26	7.423		5.403	7.462	7.71	8.372	2.385			EHMT2;DNMT3B;KDM1A;KAT2B		DNMT3B;CHEK1;DNMT1;GATA3		CHEK1;DNMT1;GATA3	SIRT6;CHEK1	DNMT1;SIRT6;DNMT3B;CHEK1		SIRT6;CHEK1		SIRT6;CHEK1;DNMT1		KDM1A;CHEK1;KAT2B;DNMT1;DNMT3B;EHMT2		KDM1A;EHMT2;DNMT3B;KAT2B	EHMT2;SIRT6;DNMT3B;CHEK1;KAT2B;KDM1A		KAT2B;CHEK1;DNMT1;DNMT3B	DNMT1;DNMT3B;KAT2B;CHEK1;SIRT6;GATA3	DNMT3B;EHMT2;KDM1A;SIRT6;KAT2B;CHEK1	DNMT3B;KDM1A;KAT2B;CHEK1;DNMT1;EHMT2	SIRT6;GATA3			4		4		3	2
GO_CELLULAR_RESPONSE_TO_OXYGEN_LEVELS	9.736	5.654	1.906	5.346	7.453	9.192	6.694	4.328	9.402	8.861	14.372		7.93	15.887	16.597	5.879	8.753	3.586		PDK1;EIF4EBP1;TP53;ATG7;BAD;SRC;DNMT3B;PTGS2;MYC		BAD;CAV1;PRKAA1;DNMT3B;MTOR;TP53	CAV1;BAD;TP53	BAD;CAV1	CREBBP;PRKAA1;PTEN;MTOR;FOXO1;NOTCH1	EIF4EBP1;DNMT3B;PDK1;FOXO1;MTOR;CREBBP;CAV1;BAD		FOXO1;BAD;CAV1;MTOR;CREBBP;PDK1;PTEN;NOTCH1;PRKAA1		PDK1;FOXO1;CAV1;MTOR;EIF4EBP1;BAD;CREBBP	MTOR;PRKAA1;TP53;DNMT3B	FOXO1;MYC;BAD;PDK1;MTOR;CREBBP;NOTCH1;PTGS2;DNMT3B;TP53;ATG7	TP53;CAV1	PTGS2;TP53;PDK1;BAD;ATG7;EIF4EBP1;MYC;SRC;DNMT3B	MTOR;BAD;DNMT3B;ATG7;FOXO1;MYC;CREBBP;PTGS2;TP53;EIF4EBP1;PRKAA1;NOTCH1;PTEN;PDK1;SRC		EIF4EBP1;ATG7;BAD;TP53;SRC;PDK1;DNMT3B;PTGS2	BAD;DNMT3B;CREBBP;EP300;ATG7;TWIST1;SRC;PTGS2;PDK1;FOXO1;CAV1;TP53;EIF4EBP1;PRKAA1;MTOR;NOTCH1	DNMT3B;FOXO1;MTOR;CAV1;PRKAA1;SRC;EIF4EBP1;BAD;PDK1;ATG7;CREBBP;MYC;PTEN;TP53;PTGS2;NOTCH1	ATG7;PDK1;DNMT3B;TP53;BAD;MYC;PTGS2	EP300;TWIST1;CAV1;CREBBP;FOXO1;PRKAA1;NOTCH1;BAD;MTOR	MTOR;NOTCH1;CREBBP;FOXO1		9		6	3	2	6
GO_PRODUCTION_OF_SMALL_RNA_INVOLVED_IN_GENE_SILENCING_BY_RNA		5.654	4.541	3.862	3.711	3.848	3.903	3.046	5.975	2.405	5.876			4.462	4.623	2.281	3.72	4.168				STAT3;TP53;SMAD2;EGFR		EGFR;STAT3;SMAD2	MAP2K1;SMAD2;ESR1	SMAD2;EGFR;STAT3		MAP2K1;SMAD2;EGFR		STAT3;EGFR;SMAD2	EGFR;TP53	STAT3;MAP2K1;ESR1;EGFR;TP53		TP53;STAT3	STAT3;MAP2K1;TP53;SMAD2;ESR1			SMAD2;TP53;ESR1;MAP2K1	MAP2K1;SMAD2;TP53;EGFR	STAT3;TP53	ESR1;SMAD2;MAP2K1	ESR1;EGFR;MAP2K1				4		3	3
GO_DEVELOPMENT_OF_PRIMARY_SEXUAL_CHARACTERISTICS	2.395	5.654	6.831	4.198	2.958	4.154	3.227		5.961	4.024	7.98		4.225	11.765	6.145	2.83	7.425	3.586		PDGFRB;SRC;BRCA2		PDGFRA;KIT;NCOA1;ATM;GATA3;BCL2L1		PDGFRA;GATA3;ATM;NCOA1;BCL2L1;KIT	NCOA1;ESR1;BAX;IDH1;PDGFRA	ATM;KIT;CASP3;NCOA1		BAX;ATM;PGR;NCOA1;IDH1		KIT;CASP3;ATM;NCOA1		PDGFRA;NCOA1;KIT;KDM5A;BRCA2;PDGFRB;CASP3;ESR1		PDGFRB;BRCA2;CASP3;SRC;KIT	NCOA1;BRCA2;PDGFRB;KIT;IDH1;ESR1;PDGFRA;BAX;CASP3;SRC		SRC;KIT;BRCA2;PDGFRB;CASP3	ESR1;BAX;KIT;AR;SRC;CASP3;NCOA1;KDM5A;IDH1;PDGFRB;BRCA2;PDGFRA;GATA3	ATM;NCOA1;IDH1;PDGFRB;BAX;SRC;BRCA2;PGR	CASP3;KIT;PDGFRB;BRCA2	ESR1;PDGFRA;AR;KDM5A;GATA3;BAX;IDH1;NCOA1	KDM5A;PDGFRA;ESR1;NCOA1		3		6		6	5
GO_EXTRINSIC_APOPTOTIC_SIGNALING_PATHWAY	4.422	5.622	5.399	3.141	6.149	5.281	5.412		4.895	5.083	7.936		5.32	8.006	7.237	4.753	4.986	1.556		DEPTOR;BAD;FGFR1;SRC;RELA		BAD;DEPTOR;CAV1;ERBB3;BCL2L1;RELA	CAV1;RELA;BAD	BAD;BCL2L1;ERBB3;DEPTOR;CAV1	BAX;RET;BAK1;PTEN	DEPTOR;BAK1;CASP3;RELA;ERBB3;CAV1;BAD		BAX;BAD;RELA;RET;PTEN;CAV1		CASP3;ERBB3;CAV1;DEPTOR;RELA;BAD		FGFR1;BAD;RELA;CASP3;RET;YAP1;DEPTOR	CAV1;RELA	CASP3;RELA;BAD;SRC;DEPTOR;FGFR1	BAD;RET;DEPTOR;FGFR1;BAK1;RELA;PTEN;BAX;CASP3;SRC		BAD;SRC;DEPTOR;RET;FGFR1;CASP3	DEPTOR;BAD;ERBB3;BAX;AR;SRC;CASP3;CAV1;RET;FGFR1	FGFR1;DEPTOR;CAV1;SRC;RELA;BAX;BAD;RET;PTEN	FGFR1;BAD;CASP3;RELA;RET;DEPTOR	ERBB3;AR;RET;CAV1;BAX;BAD	YAP1;RET		5		6	3	5	4
GO_CELLULAR_RESPONSE_TO_HEAT		5.62	2.334	5.353	3.838	6.728	4.106	3.733	5.345		5.225			6.484	6.761	2.614	6.444	3.215				AKT1S1;CDKN1A;ATM;RPTOR;MTOR	RPTOR;ATR	RPTOR;ATM	CREBBP;ATR;MTOR;AKT1S1;CDKN1A	ATM;RPTOR;MTOR;CREBBP		RPTOR;AKT1S1;MTOR;CREBBP;ATM;CDKN1A		CREBBP;MTOR;ATM;RPTOR	CDKN1A;MTOR;AKT1S1	MTOR;RPTOR;ATR;CREBBP;CDKN1A;PTGS2	ATR;RPTOR		MTOR;ATR;AKT1S1;CDKN1A;CREBBP;PTGS2			PTGS2;CREBBP;EP300;CDKN1A;AKT1S1;MTOR;RPTOR	CDKN1A;ATM;MTOR;CREBBP;RPTOR;AKT1S1;PTGS2	RPTOR;PTGS2;ATR	EP300;RPTOR;AKT1S1;CREBBP;CDKN1A;MTOR	MTOR;CDKN1A;CREBBP				5	2	2	5
GO_CELLULAR_MACROMOLECULE_LOCALIZATION	4.963	5.62	3.973	5.036	8.001	6.352	6.782	2.776	9.311	5.235	10.239		3.278	9.608	10.691	5.839	7.106	3.454	2.831	BRCA2;RB1;TP53;KDM1A;BAD;AURKA;MAPK8;MED1;SRC;ATG3;PTGS2;ITGA4		BAD;EGFR;ERBB2;CAV1;HDAC3;CDKN1A;PRKAA1;ATM;STAT3;TP53;SQSTM1;ITGB1;BCL2L1	ATR;CAV1;SQSTM1;BAD;ERBB2;TP53	EGFR;ATM;BAD;STAT3;ERBB2;BCL2L1;CAV1;HDAC3	ESR1;BAX;IDH1;BRAF;PRKAA1;TSC2;ERBB2;ATR;CTNNB1;CDKN1A;ITGB1;LRP6;NFKBIA	TSC2;MED1;STAT3;ATG3;ATM;LRP6;MAPK8;IKBKB;NFKBIA;EGFR;EZH2;ITGB1;ERBB2;YWHAZ;RB1;CAV1;HDAC3;BAD		BAX;BAD;ERBB2;CAV1;EGFR;ATM;TSC2;CDKN1A;IDH1;CTNNB1;ITGB1;NFKBIA;LRP6;PRKAA1;BRAF		ERBB2;CAV1;TSC2;MAPK8;EGFR;HDAC3;RB1;ATG3;STAT3;IKBKB;MED1;BAD;NFKBIA;ATM;LRP6	CDKN1A;PRKAA1;TP53;EGFR;SQSTM1;ITGB1	LRP6;TP53;NFKBIA;KDM1A;AURKA;EGFR;ITGA4;RB1;IKBKB;BRAF;BRCA2;STAT3;ATG3;ESR1;SQSTM1;MAPK8;ITGB1;HDAC3;CTNNB1;BAD;TSC2;HK2;ATR;CDKN1A;PTGS2	ERBB2;TP53;CAV1;ATR;SQSTM1	PTGS2;KDM1A;TP53;BRCA2;ITGA4;ATG3;HDAC3;MAPK8;BAD;STAT3;SRC;AURKA;RB1;IKBKB	AURKA;ATR;BRCA2;ATG3;NFKBIA;BRAF;ITGB1;KDM1A;TP53;PRKAA1;HDAC3;CTNNB1;BAX;ERBB2;TSC2;STAT3;LRP6;IKBKB;IDH1;PTGS2;MAPK8;ESR1;BAD;RB1;ITGA4;CDKN1A;SRC		IKBKB;BAD;TP53;SRC;RB1;ATG3;BRCA2;AURKA;PTGS2;MAPK8	BAX;LRP6;ATG3;RB1;TP53;PRKAA1;ESR1;AR;SRC;TSC2;SQSTM1;CAV1;MED1;PTGS2;AURKA;BAD;NFKBIA;CDKN1A;BRAF;CTNNB1;MAPK8;IDH1;ITGB1;BRCA2;ERBB2;IKBKB	ERBB2;ATM;CTNNB1;PRKAA1;ITGA4;BRAF;TSC2;ITGB1;CDKN1A;KDM1A;CAV1;MED1;ATG3;LRP6;IDH1;MAPK8;SRC;AURKA;BRCA2;PTGS2;EGFR;BAX;NFKBIA;BAD;TP53;RB1	HK2;IKBKB;ATG3;MAPK8;KDM1A;BAD;RB1;BRCA2;TP53;PTGS2;HDAC3;ATR;STAT3;SQSTM1;ITGA4;AURKA	ESR1;NFKBIA;CTNNB1;LRP6;ITGB1;BRAF;TSC2;AR;CAV1;ERBB2;CDKN1A;PRKAA1;BAX;BAD;MED1;SQSTM1;IDH1	ESR1;ITGB1;BRAF;LRP6;CTNNB1;CDKN1A;TSC2;EGFR;NFKBIA	ITGB1;MED1;EZH2;TSC2;YWHAZ	12		13	6	8	13
GO_T_CELL_SELECTION		5.591	2.927	2.444	3.665	2.43	3.855	3.02	3.149		3.096			3.112	2.023	2.251	3.674	2.684				STAT3;MTOR;STAT6;GATA3		STAT3;GATA3	MTOR;STAT6	STAT6;STAT3;MTOR		STAT6;MTOR		STAT6;STAT3;MTOR	MTOR;STAT6	STAT6;STAT3;MTOR			STAT3;MTOR;STAT6			STAT6;GATA3;MTOR	STAT6;MTOR	STAT6;STAT3	STAT6;GATA3;MTOR	MTOR;STAT6				4		2	2
GO_POSITIVE_REGULATION_OF_FIBROBLAST_PROLIFERATION	3.959	5.591	2.927	7.054	2.338	5.362	2.486	4.679	10.807	3.708	10.643		2.47	8.989	9.293	3.546	6.807	7.592		PDGFRB;JUN;MYC		JUN;EGFR;PDGFRA;CDKN1A		EGFR;PDGFRA	ESR1;PDGFRA;PRKDC;CDKN1A;SIRT6	EGFR;SIRT6		SIRT6;PRKDC;CDKN1A;EGFR		SIRT6;EGFR	CDKN1A;JUN;EGFR	PRKDC;PDGFRA;MYC;JUN;PDGFRB;ESR1;CDKN1A;EGFR		JUN;PDGFRB;MYC	SIRT6;PDGFRB;PRKDC;CDKN1A;MYC;JUN;PDGFRA;ESR1		PDGFRB;JUN	ESR1;JUN;CDKN1A;PRKDC;PDGFRB;SIRT6;PDGFRA	CDKN1A;PDGFRB;SIRT6;JUN;MYC;PRKDC;EGFR	PDGFRB;MYC;JUN	ESR1;PDGFRA;PRKDC;CDKN1A;SIRT6	PDGFRA;ESR1;EGFR;PRKDC;CDKN1A		3		4		2	5
GO_REGULATION_OF_PHOSPHATIDYLINOSITOL_3_KINASE_SIGNALING	4.215	5.589	4.969	4.016	9.395	3.994	8.384	2.401	9.199	6.462	10.429		6.727	11.959	8.06	4.845	5.052	4.428	2.639	PDGFRB;FGFR1;SRC;PIK3CA		EGFR;PDGFRA;KIT;ERBB3;IGF1R		EGFR;PDGFRA;ERBB3;KIT	TSC2;PDGFRA;PTEN;KLF4	TSC2;BECN1;KLF4;PIK3CA;KDR;EGFR;KIT;ERBB3		TSC2;KLF4;EGFR;PTEN		ERBB3;KIT;EGFR;TSC2;PIK3CA;KDR;BECN1	EGFR;IGF1R	KLF4;KDR;PDGFRA;FGFR1;KIT;TSC2;PDGFRB;PIK3CA;EGFR		PDGFRB;KDR;PIK3CA;SRC;KIT;FGFR1	PDGFRB;KLF4;FGFR1;TSC2;PIK3CA;KDR;PDGFRA;PTEN;KIT;SRC		PIK3CA;SRC;KIT;KDR;PDGFRB;FGFR1	ERBB3;FGFR1;TWIST1;KIT;SRC;TSC2;PIK3CA;PDGFRB;KDR;KLF4;PDGFRA	PDGFRB;SRC;KLF4;TSC2;FGFR1;PTEN;PIK3CA;EGFR	PIK3CA;PDGFRB;FGFR1;KDR;KIT	PDGFRA;TWIST1;ERBB3;TSC2;KLF4	KLF4;PDGFRA;TSC2;EGFR	KLF4;TSC2	4		5		4	4
GO_MUSCLE_TISSUE_DEVELOPMENT	3.565	5.584	2.457	7.468	5.872	7.4	5.346	3.592	7.22	2.34	9.02		2.52	13.7	10.793	2.13	11.847	5.991	1.914	RB1;FGFR1;FOS;PDGFRB;MED1		PDGFRA;CAV1;FOS;PRKAA1;MTOR;ERBB3;ITGB1	CAV1;FOS	PDGFRA;ERBB3;CAV1	PDGFRA;PRKAA1;PTEN;MTOR;CTNNB1;ITGB1;HDAC4;NOTCH1;SIRT6	MED1;ERBB3;RB1;MTOR;ITGB1;HDAC4;SIRT6;CAV1		HDAC4;SIRT6;CAV1;MTOR;PTEN;CTNNB1;ITGB1;NOTCH1;PRKAA1		ERBB3;CAV1;MTOR;RB1;MED1;HDAC4;SIRT6	MTOR;PRKAA1;FOS;ITGB1	HDAC4;PDGFRA;FGFR1;CTNNB1;PDGFRB;MTOR;FOS;YAP1;NOTCH1;ITGB1;RB1	FOS;CAV1	PDGFRB;FGFR1;RB1;FOS	MTOR;RB1;SIRT6;PDGFRB;HDAC4;ITGB1;NOTCH1;FGFR1;CTNNB1;PRKAA1;PDGFRA;PTEN;FOS		RB1;PDGFRB;FGFR1;FOS	ERBB3;FGFR1;EP300;TWIST1;HDAC4;CAV1;RB1;FOS;CTNNB1;PDGFRB;MED1;ITGB1;SIRT6;PDGFRA;PRKAA1;MTOR;NOTCH1	CTNNB1;MTOR;PDGFRB;PRKAA1;HDAC4;CAV1;SIRT6;FOS;MED1;ITGB1;FGFR1;PTEN;RB1;NOTCH1	FGFR1;FOS;PDGFRB;RB1	CTNNB1;PDGFRA;EP300;ERBB3;TWIST1;ITGB1;CAV1;PRKAA1;NOTCH1;SIRT6;HDAC4;MED1;MTOR	MTOR;NOTCH1;PDGFRA;HDAC4;ITGB1;CTNNB1;YAP1	MED1;ITGB1	5		7	2	3	9
GO_POSITIVE_REGULATION_OF_ESTABLISHMENT_OF_PROTEIN_LOCALIZATION	3.556	5.57	4.498		4.838	2.428	4.294	2.557	3.631	4.958	5.122		3.361	3.532	4.621	3.697	1.524			TP53;BAD;MAPK8;SRC;PTGS2		BAD;EGFR;ERBB2;HDAC3;PRKAA1;STAT3;TP53	BAD;TP53;ERBB2	EGFR;BAD;STAT3;ERBB2;HDAC3		STAT3;MAPK8;EGFR;ERBB2;YWHAZ;HDAC3;BAD		ERBB2;PRKAA1;BAD;EGFR		ERBB2;EGFR;MAPK8;HDAC3;STAT3;BAD	EGFR;PRKAA1;TP53	HDAC3;BAD;EGFR;STAT3;MAPK8;PTGS2;TP53	TP53;ERBB2	PTGS2;TP53;HDAC3;MAPK8;BAD;STAT3;SRC	BAD;ERBB2;TP53;PTGS2;PRKAA1;HDAC3;STAT3;MAPK8;SRC		BAD;TP53;SRC;PTGS2;MAPK8	BAD;PTGS2;SRC;MAPK8;TP53;ERBB2;PRKAA1	ERBB2;MAPK8;PRKAA1;SRC;BAD;TP53;PTGS2;EGFR	MAPK8;BAD;TP53;PTGS2;HDAC3;STAT3	ERBB2;PRKAA1;BAD			5		7	3	5
GO_POSITIVE_REGULATION_OF_LEUKOCYTE_CELL_CELL_ADHESION	5.539	5.567	2.925		2.905	2.169	3.175	3.046	3.021	5.031	3.767		3.162	4.71	4.978	3.697	2.914			PIK3CA;ANXA1;BAD;SRC;RELA;ITGA4		BAD;CAV1;SOCS1;GATA3;ANXA1;RELA	CAV1;RELA;BAD	BAD;CAV1;GATA3		RELA;PIK3CA;CAV1;BAD		RELA;CAV1;BAD		BAD;CAV1;RELA;PIK3CA	RELA;SOCS1;ANXA1	BAD;RELA;PIK3CA;ANXA1;ITGA4	CAV1;RELA	ANXA1;PIK3CA;ITGA4;RELA;BAD;SRC	BAD;ITGA4;ANXA1;PIK3CA;RELA;SRC		PIK3CA;BAD;ANXA1;SRC	BAD;TNFSF11;SRC;PIK3CA;CAV1;ANXA1;GATA3	ANXA1;CAV1;RELA;ITGA4;SRC;BAD;PIK3CA	PIK3CA;BAD;RELA;ANXA1;ITGA4	TNFSF11;GATA3;BAD;CAV1			6		6	3	3
GO_NEGATIVE_REGULATION_OF_CATALYTIC_ACTIVITY	4.662	5.544	1.737	4.27	7.32	7.89	7.183	4.496	9.243	5.613	9.781		6.111	11.781	11.633	5.095	5.439	4.181	1.399	PDK1;RB1;DEPTOR;TP53;ANXA1;SRC;PTGS2;KAT2B		DEPTOR;AKT1S1;CDKN1A;CAV1;SOCS1;RPTOR;ANXA1;TP53;IGF1R	RPTOR;CAV1;TP53	RPTOR;CAV1;DEPTOR	TSC2;PTEN;AKT1S1;CDKN1B;CDKN1A;KLF4;NOTCH1;LRP6	TSC2;KLF4;PDK1;RB1;DEPTOR;CDKN1B;LRP6;IKBKB;CASP3;RPTOR;ILK;CAV1		ILK;RPTOR;AKT1S1;CDKN1B;PDK1;CDKN1A;PTEN;TSC2;KLF4;NOTCH1;LRP6;CAV1		CASP3;PDK1;CDKN1B;RPTOR;CAV1;TSC2;ILK;DEPTOR;RB1;IKBKB;LRP6	SOCS1;ANXA1;CDKN1A;TP53;IGF1R;AKT1S1	KLF4;IKBKB;PDK1;TSC2;KDM5A;CASP3;RPTOR;KAT2B;CDKN1B;LRP6;CDKN1A;NOTCH1;ANXA1;PTGS2;TP53;DEPTOR;RB1	TP53;CAV1;RPTOR	PTGS2;TP53;ANXA1;CASP3;PDK1;KAT2B;SRC;DEPTOR;RB1;IKBKB	PDK1;RB1;KLF4;IKBKB;AKT1S1;DEPTOR;KAT2B;CDKN1B;PTGS2;CDKN1A;ANXA1;TP53;TSC2;NOTCH1;LRP6;PTEN;CASP3;SRC		IKBKB;ANXA1;TP53;SRC;RB1;DEPTOR;PDK1;KAT2B;PTGS2;CASP3	LRP6;RB1;TP53;DEPTOR;CDKN1B;KAT2B;SRC;TSC2;CAV1;KDM5A;AKT1S1;RPTOR;PTGS2;PDK1;CASP3;CDKN1A;ANXA1;KLF4;IKBKB;NOTCH1	ILK;TSC2;PDK1;CDKN1A;ANXA1;PTEN;DEPTOR;CAV1;KAT2B;RPTOR;NOTCH1;LRP6;SRC;CDKN1B;PTGS2;KLF4;AKT1S1;TP53;RB1	PDK1;RPTOR;IKBKB;KAT2B;TP53;RB1;PTGS2;CASP3;ANXA1;DEPTOR	RPTOR;LRP6;AKT1S1;KDM5A;TSC2;CAV1;CDKN1A;NOTCH1;CDKN1B;KLF4	NOTCH1;KDM5A;KLF4;CDKN1B;LRP6;TSC2;CDKN1A	KLF4;TSC2	8		9	3	3	8
GO_CELLULAR_RESPONSE_TO_LIPID	6.583	5.536	2.061	6.121	11.082	9.285	8.5	5.144	11.292	4.857	10.904		4.28	13.135	14.001	4.447	10.982	8.287	3.479	EIF4EBP1;SMARCA4;ANXA1;SRC;BAD;MAPK8;MED1;DNMT3B;RELA		BAD;EGFR;VIM;PRKAA1;ATM;DNMT3B;ANXA1;RELA	RELA;BAD	EGFR;ATM;BAD	ESR1;CLDN1;VIM;PRKAA1;RET;FOXO1;KLF4;LRP6;NFKBIA	KLF4;MED1;NCOA3;EIF4EBP1;DNMT3B;VIM;ATM;FOXO1;LRP6;MAPK8;NFKBIA;EGFR;RELA;BAD		FOXO1;BAD;VIM;RELA;EGFR;ATM;PGR;RET;KLF4;LRP6;PRKAA1;NFKBIA		FOXO1;EGFR;MAPK8;NCOA3;EIF4EBP1;MED1;RELA;BAD;NFKBIA;ATM;LRP6	VIM;ANXA1;RELA;PRKAA1;DNMT3B;EGFR	KLF4;FOXO1;VIM;BAD;RELA;CBX3;EGFR;NFKBIA;RET;YAP1;LRP6;ESR1;MAPK8;SMARCA4;ANXA1;NCOA3;DNMT3B		ANXA1;RELA;MAPK8;BAD;EIF4EBP1;SRC;NCOA3;DNMT3B	BAD;DNMT3B;CLDN1;NCOA3;KLF4;FOXO1;NFKBIA;RET;LRP6;ESR1;EIF4EBP1;ANXA1;PRKAA1;RELA;MAPK8;VIM;SRC		ANXA1;EIF4EBP1;BAD;SRC;DNMT3B;RET;MAPK8	EP300;LRP6;PRKAA1;ESR1;AR;SRC;FOXO1;HDAC1;CLDN1;MED1;DNMT3B;EIF4EBP1;BAD;VIM;NFKBIA;ANXA1;MAPK8;RET;KLF4	DNMT3B;ATM;FOXO1;SMARCA4;PRKAA1;EIF4EBP1;ANXA1;MED1;PGR;LRP6;MAPK8;RELA;SRC;RET;VIM;EGFR;NFKBIA;BAD;KLF4	NCOA3;DNMT3B;MAPK8;BAD;RELA;ANXA1;CBX3;RET	ESR1;NFKBIA;EP300;LRP6;HDAC1;AR;RET;FOXO1;PRKAA1;CLDN1;BAD;MED1;VIM;KLF4	ESR1;FOXO1;SMARCA4;RET;KLF4;VIM;LRP6;EGFR;YAP1;NFKBIA	MED1;KLF4;VIM;DNMT3B	9		8	2	3	9
GO_HEAD_DEVELOPMENT	3.836	5.533	4.219	7.976	7.303	8.912	5.245	2.635	9.221	4.777	12.633		3.574	11.755	11.607	2.939	9.252	7.13	3.13	BRCA2;TP53;FGFR1;KDM1A;BAD;MED1;SRC		BAD;EGFR;PDGFRA;NCOA1;ATM;MTOR;TP53;ITGB1;PHF8	BAD;TP53	EGFR;PDGFRA;ATM;BAD;PHF8;NCOA1	NCOA1;BAX;PDGFRA;PTEN;PRKDC;MTOR;BAK1;CTNNB1;ITGB1;NOTCH1;MAP2K1;LRP6	MED1;PHF8;NCOA1;ATM;LRP6;BAK1;MTOR;CASP3;EGFR;ITGB1;EZH2;BAD		BAX;BAD;PRKDC;MAP2K1;MTOR;EGFR;ATM;NCOA1;PTEN;CTNNB1;ITGB1;NOTCH1;LRP6		CASP3;BAD;MTOR;EGFR;PHF8;NCOA1;MED1;ATM;LRP6	MTOR;EGFR;TP53;ITGB1	PHGDH;PRKDC;CTNNB1;PDGFRA;FGFR1;NCOA1;BAD;BRCA2;KDM1A;MAP2K1;CASP3;MTOR;LRP6;EGFR;NOTCH1;ITGB1;TP53		KDM1A;TP53;BRCA2;CASP3;BAD;PHGDH;SRC;ALK;FGFR1	BRCA2;ITGB1;TP53;PDGFRA;PTEN;BAX;CTNNB1;CASP3;NCOA1;MTOR;PRKDC;SRC;FGFR1;ALK;LRP6;PHGDH;NOTCH1;BAK1;BAD;MAP2K1;KDM1A		BAD;TP53;SRC;PHGDH;BRCA2;FGFR1;CASP3	EP300;BAX;PHGDH;LRP6;TP53;SRC;MAP2K1;HDAC1;MED1;CASP3;PRKDC;MTOR;BAD;NCOA1;CTNNB1;ITGB1;BRCA2;FGFR1;PDGFRA;NOTCH1	ATM;CTNNB1;NCOA1;ITGB1;FGFR1;PRKDC;KDM1A;MTOR;MED1;NOTCH1;LRP6;SRC;MAP2K1;BRCA2;EGFR;BAX;BAD;PTEN;TP53	FGFR1;KDM1A;TP53;BAD;BRCA2;PHGDH;CASP3	CTNNB1;PDGFRA;MAP2K1;EP300;PRKDC;LRP6;HDAC1;ITGB1;BAX;NOTCH1;BAD;MED1;NCOA1;MTOR	MTOR;NOTCH1;PDGFRA;NCOA1;ITGB1;MAP2K1;PRKDC;LRP6;CTNNB1;EGFR	MED1;EZH2;ITGB1;BAK1	7		9	2	6	12
GO_ENDOCRINE_SYSTEM_DEVELOPMENT	2.975	5.511	4.906	5.25	3.758	3.933	2.872		5.22	2.713	7.544		2.86	7.592	5.351	2.554	6.312	3.152	2.614	PDGFRB;BAD;ANXA1		BAD;PDGFRA;GATA3;SMAD2;ANXA1		SMAD2;BAD;PDGFRA;GATA3	PDGFRA;SMAD2;FOXO1;BAK1;MAP2K1	FOXO1;SMAD2;BAD;BAK1		FOXO1;MAP2K1;BAD;SMAD2		BAD;FOXO1;SMAD2		FOXO1;PDGFRA;BAD;PDGFRB;MAP2K1;ANXA1		BAD;PDGFRB;ANXA1	BAD;PDGFRB;MAP2K1;FOXO1;BAK1;ANXA1;SMAD2;PDGFRA		BAD;PDGFRB;ANXA1	BAD;MAP2K1;FOXO1;ANXA1;SMAD2;PDGFRB;PDGFRA;GATA3	ANXA1;FOXO1;SMAD2;PDGFRB;MAP2K1;BAD	PDGFRB;BAD;ANXA1	PDGFRA;MAP2K1;FOXO1;SMAD2;GATA3;BAD	PDGFRA;MAP2K1;FOXO1	BAK1;SMAD2	3		5		4	5
GO_MULTI_ORGANISM_PROCESS	3.227	5.501	4.548	5.036	5.275	7.573	5.186	1.536	7.516	3.278	7.935		2.966	9.67	9.635	2.914	7.811	5.197		BRCA2;FOS;BAD;AURKA;MED1;SRC;PTGS2		BAD;KIT;CAV1;FOS;NCOA1;ATM;STAT3;MTOR;ITGB1;BCL2L1	CAV1;FOS;BAD	ATM;BAD;NCOA1;STAT3;BCL2L1;KIT;CAV1	NCOA1;ESR1;BAX;ITGA5;PTEN;MTOR;CTNNB1;ITGB1;HDAC4;NOTCH1	MED1;STAT3;NCOA1;PIAS1;ATM;MTOR;KIT;ITGB1;HDAC4;CAV1;BAD		HDAC4;BAX;BAD;ITGA5;MTOR;ATM;PGR;NCOA1;PTEN;CTNNB1;ITGB1;NOTCH1;CAV1		KIT;PIAS1;CAV1;MTOR;NCOA1;STAT3;HDAC4;BAD;MED1;ATM	MTOR;FOS;ITGB1	HDAC4;CTNNB1;NCOA1;BAD;KIT;ITGA5;KDM5A;BRCA2;STAT3;MTOR;FOS;ESR1;AURKA;NOTCH1;ITGB1;PTGS2;PIAS1	FOS;CAV1	PTGS2;FOS;BRCA2;BAD;STAT3;SRC;AURKA;KIT	NCOA1;AURKA;BAD;BRCA2;MTOR;HDAC4;FOS;ITGB1;NOTCH1;ITGA5;PTGS2;CTNNB1;ESR1;STAT3;PTEN;BAX;KIT;SRC		BAD;SRC;KIT;FOS;BRCA2;AURKA;PTGS2	BAX;HDAC4;ESR1;AR;SRC;CAV1;KDM5A;ITGA5;MED1;PTGS2;KIT;AURKA;MTOR;BAD;NCOA1;FOS;CTNNB1;ITGB1;BRCA2;NOTCH1	ATM;CTNNB1;NCOA1;HDAC4;ITGB1;ITGA5;MTOR;CAV1;FOS;MED1;PGR;NOTCH1;SRC;AURKA;BRCA2;PTGS2;BAX;BAD;PTEN	PIAS1;FOS;BAD;BRCA2;PTGS2;STAT3;AURKA;KIT	ESR1;CTNNB1;ITGB1;KDM5A;AR;CAV1;NOTCH1;BAX;BAD;HDAC4;MED1;NCOA1;MTOR;ITGA5	MTOR;NOTCH1;ESR1;NCOA1;KDM5A;HDAC4;ITGB1;CTNNB1;ITGA5		7		10	3	7	10
[truncated: 2,096 more rows]
[truncated: 18 more columns]
