# Supplementary material for: SOD1 is a synthetic-lethal target in PPM1D-mutant leukemia cells
Source: eLife journal article supplement (doi:10.7554/elife.91611), 2023-10-04
Supplement: figures [file elife-91611-figures-v1.pdf]

---

## Figures and figure supplements

*SOD1* is a synthetic-lethal target in *PPM1D*-mutant leukemia cells

**Linda Zhang et al.**

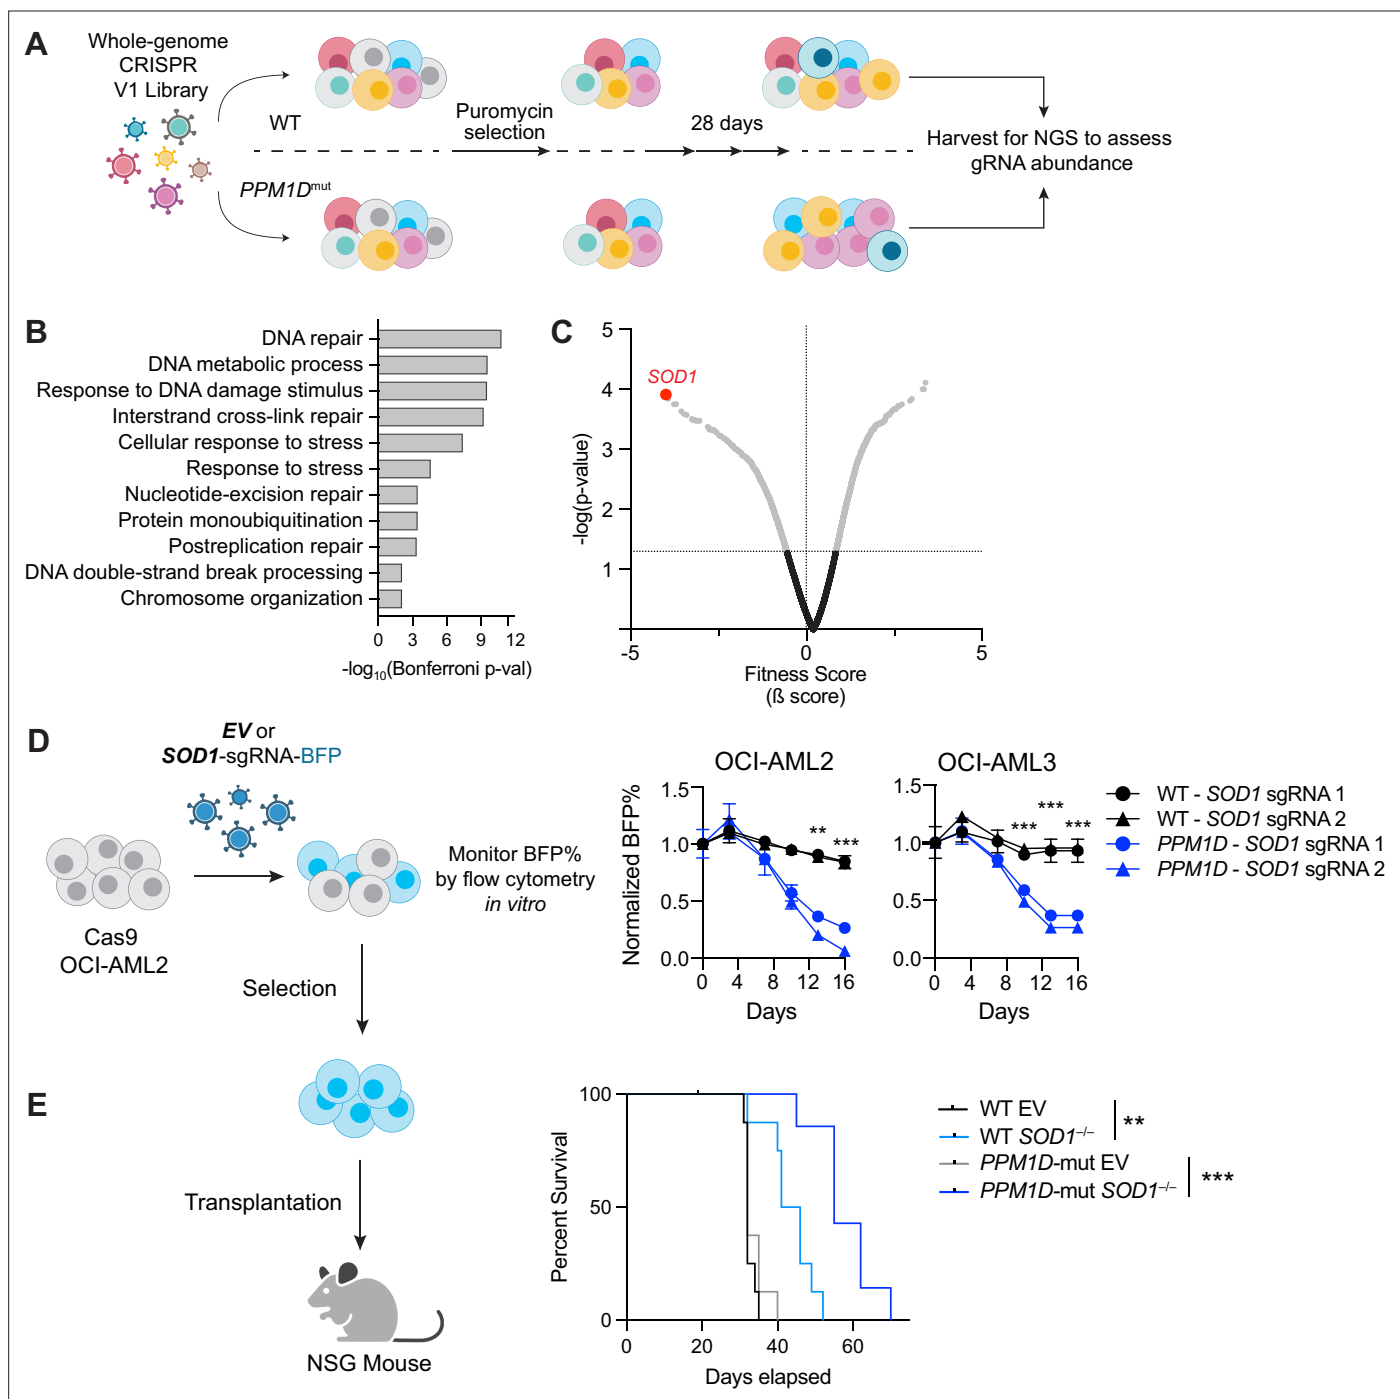

**Figure 1.** *SOD1* is a synthetic-lethal vulnerability of *PPM1D*-mutant leukemia cells. **(A)** Schematic of whole-genome CRISPR dropout screen. Wild-type (WT) Cas9-expressing OCI-AML2 and two isogenic *PPM1D*-mutant lines were transduced with the Human Improved Whole Genome Knockout CRISPR library V1 containing 90,709 guide RNAs (gRNAs) targeting 18,010 human genes at low multiplicity of infection (MOI~0.3). Each condition was performed in technical triplicates. Three days post-transduction, cells underwent puromycin selection for 3 days. Cells were harvested at day 10 as the initial timepoint and then harvested every 3 days afterward. sgRNA-sequencing was performed on cells collected on day 28. **(B)** Top biological processes based on gene ontology analysis of the top 37 genes essential for *PPM1D*-mutant cell survival. Enrichment and depletion of guides and genes were analyzed using MAGeCK-VISPR by comparing read counts from each *PPM1D*-mutant cell line replicate with counts from the initial starting population at day 10. **(C)** Volcano plot of synthetic-lethal hits ranked by fitness score with a negative score indicating genes for which their knockout leads to decreased growth or survival. *SOD1* (highlighted) was the top hit from the screen. **(D)** Left: Schematic of competitive proliferation assays used for validation of CRISPR targets. Right: WT and *PPM1D*-mutant Cas9-OCI-AML2 and Cas9-OCI-AML3 cells were transduced with lentiviruses containing a single *SOD1*-gRNA with a blue fluorescent protein (BFP) reporter. Cells were assayed by flow cytometry every 3–4 days and normalized

Figure 1 continued on next page

## Figure 1 continued

to the BFP percentage at day 3 post-transduction. Two unique gRNAs against *SOD1* were used per cell line and each condition was performed in technical duplicates; multiple unpaired t-tests, \*\* $p < 0.01$ , \*\*\* $p < 0.001$ . (E) Left: Cas9-expressing WT and *PPM1D*-mutant cells were transduced with control or sg*SOD1*-containing lentiviruses and underwent puromycin (3  $\mu\text{g/mL}$ ) selection for 3 days prior to transplantation. Sublethally irradiated (250 cGy) NSG mice were intravenously transplanted with  $3 \times 10^6$  cells. Right: Kaplan-Meier survival curve of mice transplanted with WT or *PPM1D*-mutant (gray) leukemia cells with or without *SOD1* deletion. The median survival of mice transplanted with WT, WT/*SOD1*<sup>-/-</sup>, *PPM1D*<sup>mut</sup>, and *PPM1D*<sup>mut</sup>/*SOD1*<sup>-/-</sup> leukemia cells was 32, 43, 32, and 55 days, respectively; Mantel-Cox test, \*\* $p < 0.01$ , \*\*\* $p < 0.001$ .

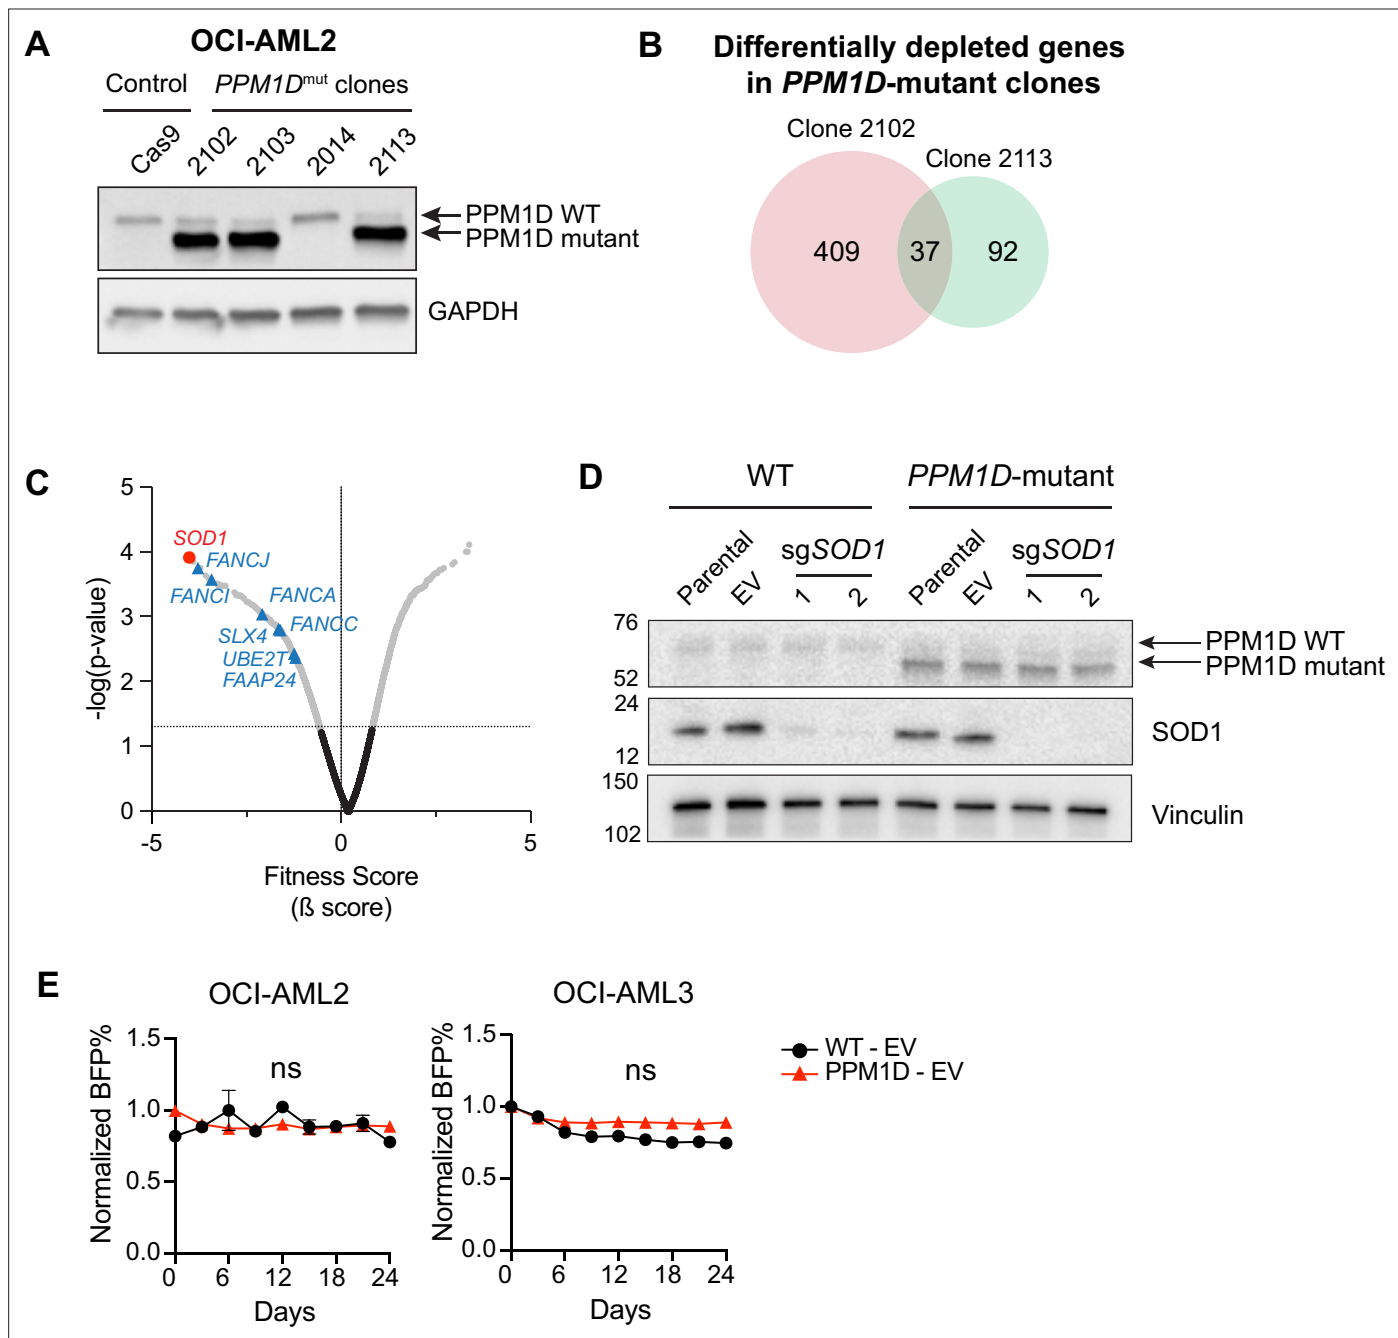

**Figure 1—figure supplement 1.** *SOD1* is a synthetic-lethal vulnerability of *PPM1D*-mutant leukemia cells. **(A)** Immunoblot validation of *PPM1D*-mutant Cas9-expressing OCI-AML2 cells generated and used for CRISPR screening. Blots were probed with anti-PPM1D (1:1000) and GAPDH (1:1000). Clones 2102 and 2113 were selected for the dropout screen. **(B)** Venn diagram of genes that were depleted from the two *PPM1D*-mutant clones (#2102, 2113) used in the dropout screen, but not depleted in the wild-type (WT) control lines. 37 genes were found to be depleted in both mutant clones. For a full list of genes, see **Figure 1—source data 1**. **(C)** Volcano plot of synthetic-lethal hits ranked by fitness score with the Fanconi anemia pathway genes highlighted in blue. **(D)** Immunoblot validation of *SOD1* deletion. WT and *PPM1D*-mutant Cas9-OCI-AML2 cells were transduced with control (empty vector [EV]) or sg*SOD1* lentiviruses. Two sgRNAs targeting *SOD1* were tested. Three days post-transduction, the cells underwent puromycin selection (3 $\mu$ g/mL) for 3 days after which they were harvested for western blot. Blots were probed with anti-PPM1D (1:1000), anti-SOD1 (1:500), and anti-vinculin (1:2500). **(E)** Cas9-OCI-AML2 and Cas9-OCI-AML3 WT or *PPM1D*-mutant cells were transduced with the empty vector control backbone tagged with a blue fluorescent protein (BFP) reporter. Cells were assayed by flow cytometry between 3 and 24 days post-transduction and normalized to the BFP percentage at day 3. Data shown are mean  $\pm$  SD (n=2 per condition).

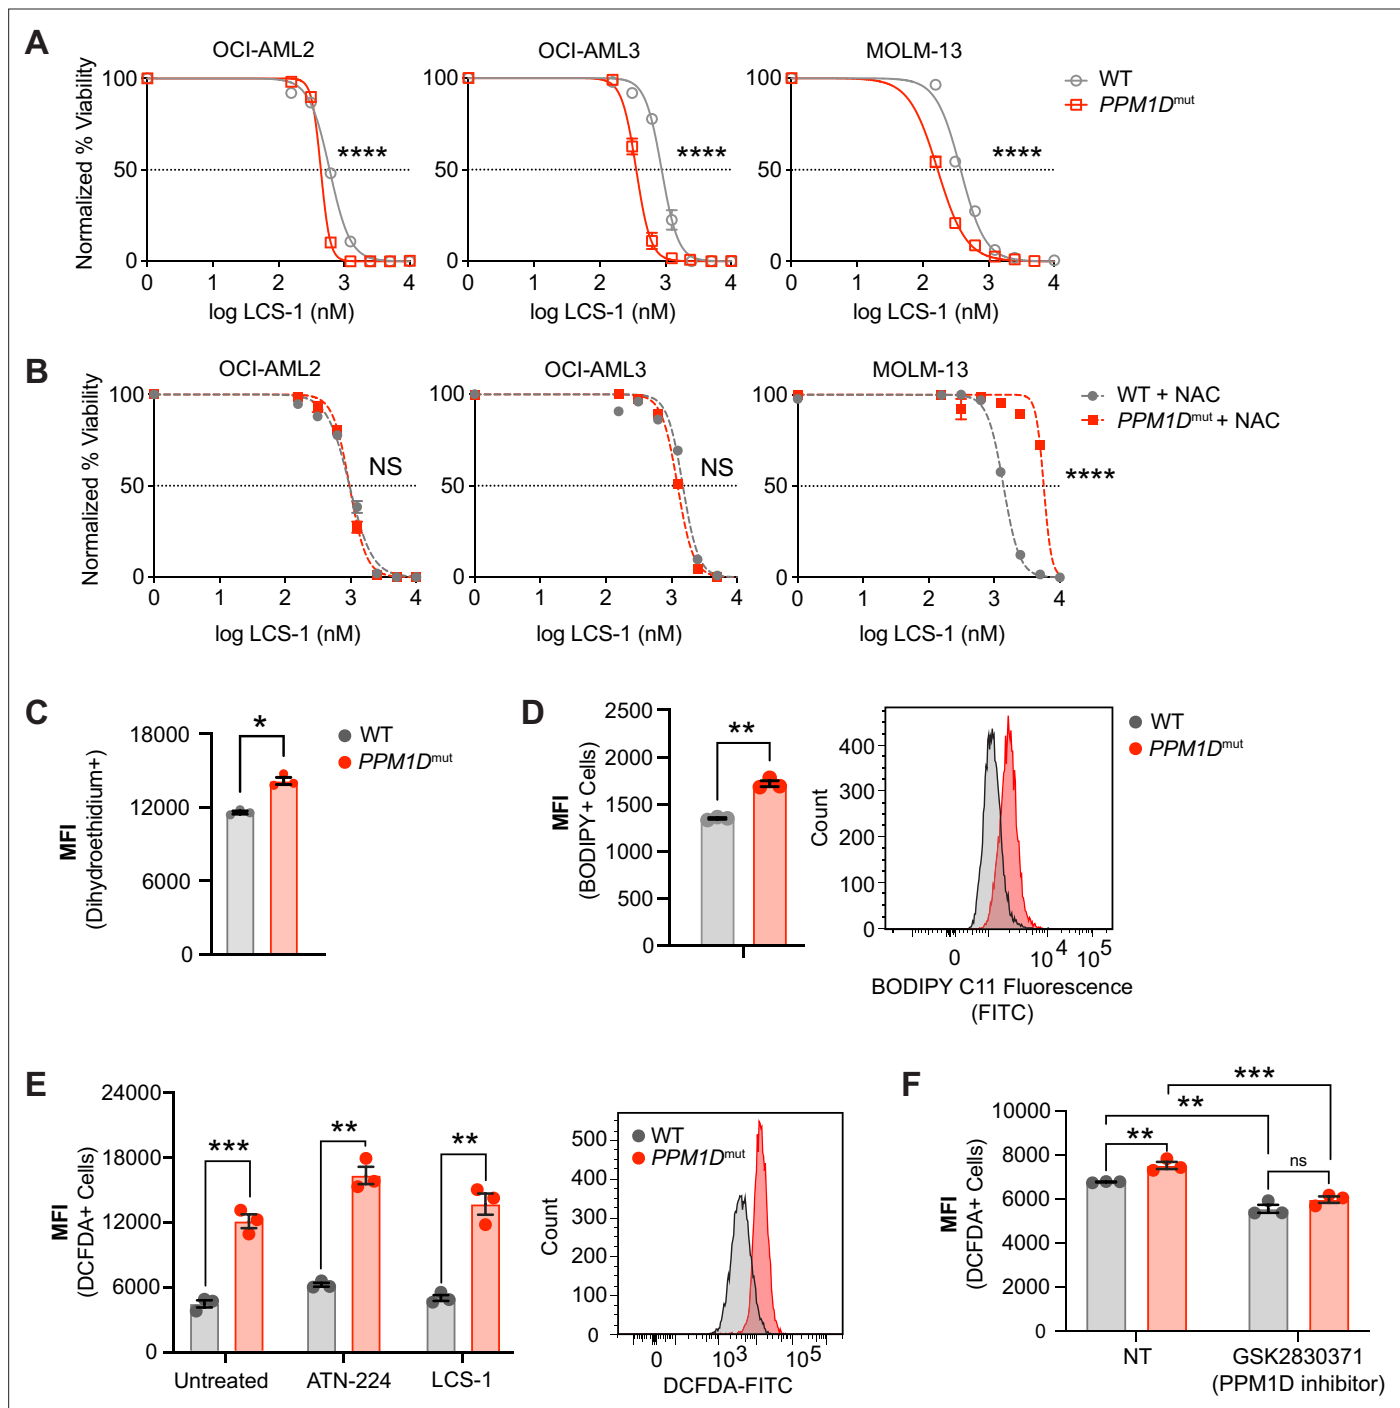

**Figure 2.** *PPM1D*-mutant cells are sensitive to SOD1 inhibition and have increased oxidative stress. (A,B) Dose response curves for cell viability with SOD1-inhibitor (LCS-1) (A) or LCS-1 in combination with 0.25  $\mu$ M NAC (B) in WT and *PPM1D*-mutant leukemia cell lines after 24-hours. Mean  $\pm$  SD (n=3) is shown with a non-linear regression curve. All values are normalized to the baseline cell viability with vehicle, as measured by MTT assay. (C) Endogenous cytoplasmic superoxide levels of WT and *PPM1D*-mutant leukemia cell lines were measured using dihydroethidium (5  $\mu$ M). The mean fluorescence intensity (MFI) of dihydroethidium was measured by flow cytometry. Mean  $\pm$  SD (n=3) is shown. (D) Lipid peroxidation measured using BODIPY 581/591 staining (2.5  $\mu$ M) of WT and *PPM1D*-mutant OCI-AML2 cells. The MFI was measured by flow cytometry. Mean  $\pm$  SD (n=3) is shown. (E-F) Measure of total reactive oxygen species using 2',7'-dichlorofluorescein diacetate (DCFDA) staining (10  $\mu$ M) measured by flow cytometry. WT and *PPM1D*-mutant OCI-AML2 cells were measured at baseline and 24-hrs after SOD1 inhibition (ATN-224 12.5  $\mu$ M, LCS-1 0.625  $\mu$ M) (E) or 24-hrs after pharmacologic *PPM1D* inhibition (GSK2830371, 5  $\mu$ M) (F); unpaired t-tests were used for statistical analyses, ns=non-significant (p>0.05), \*\*p<0.01, \*\*\*p<0.001, \*\*\*\*p<0.0001.

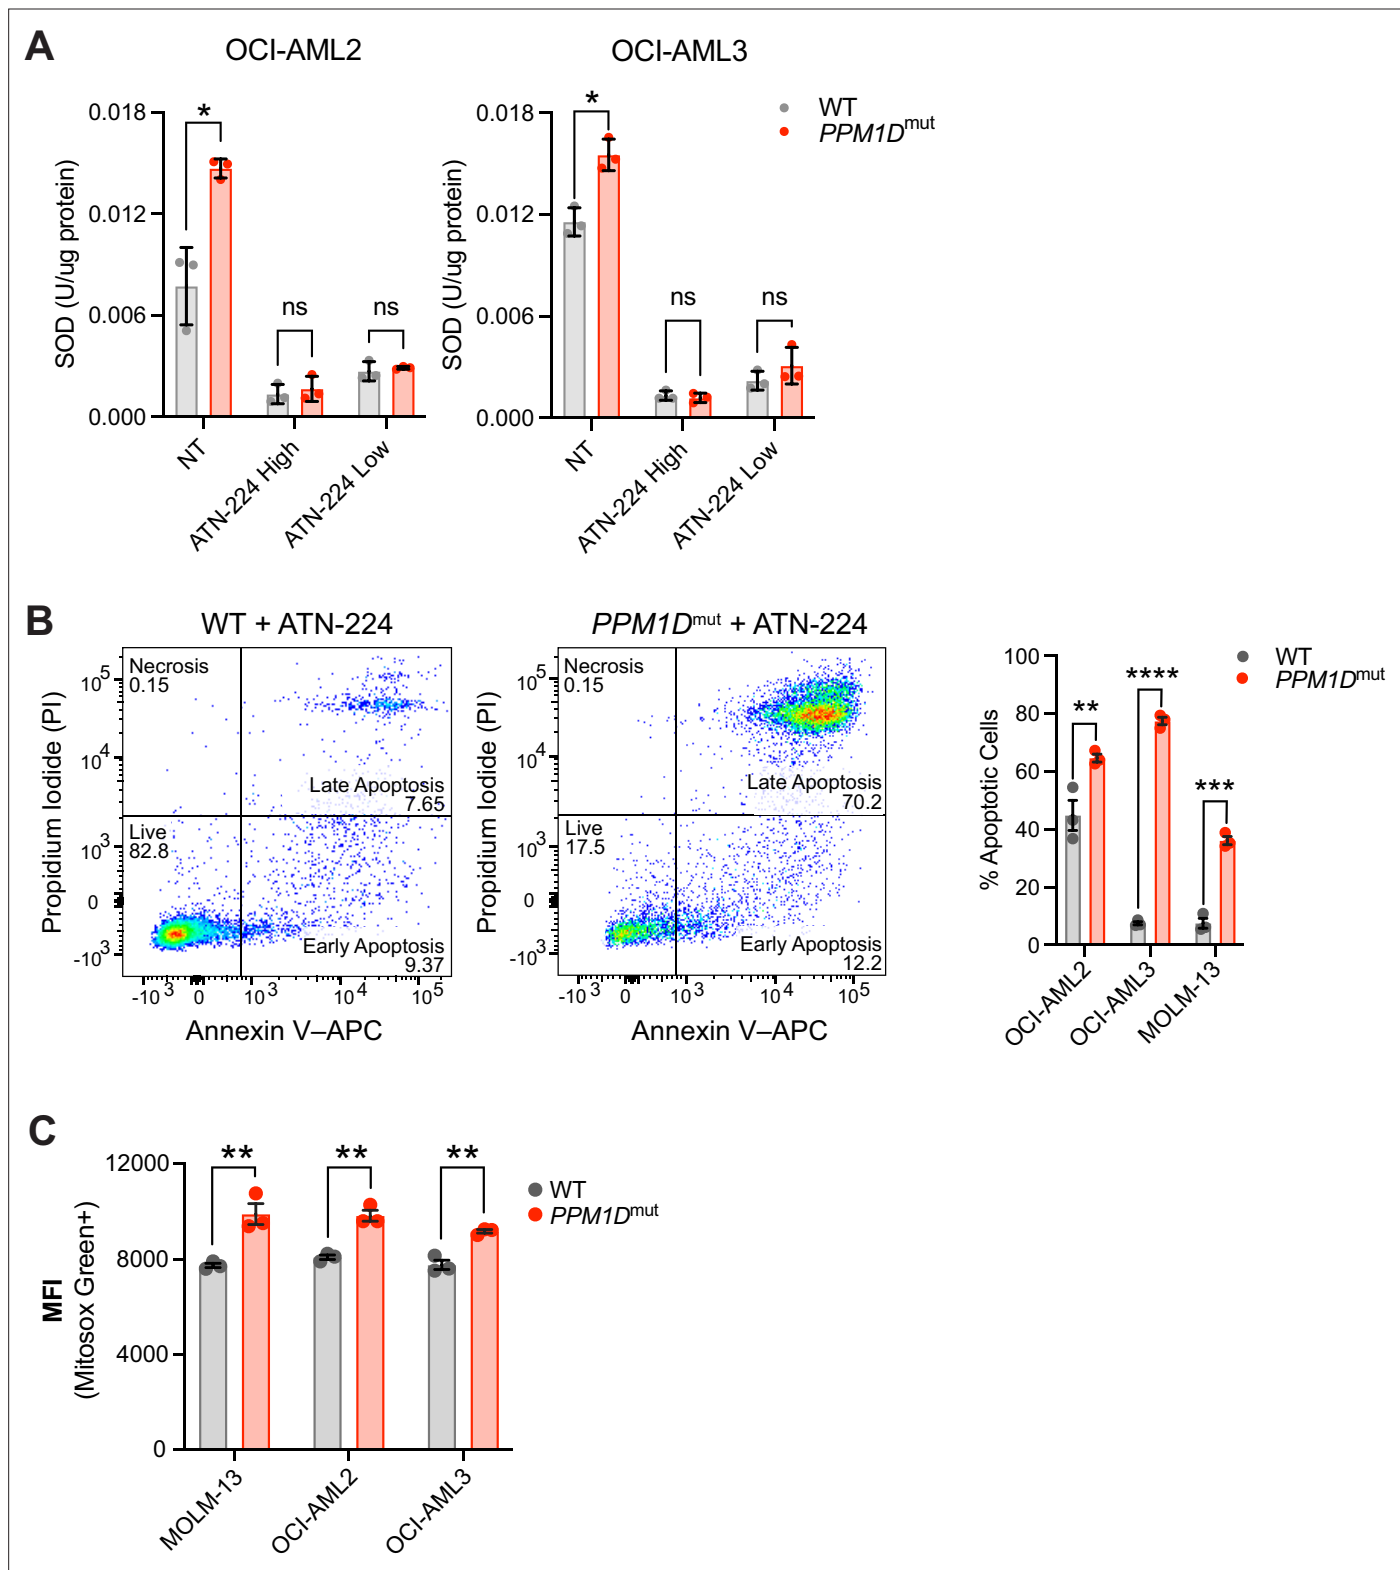

**Figure 2—figure supplement 1.** *PPM1D*-mutant cells have increased oxidative stress. **(A)** Superoxide dismutase (SOD) activity assays in OCI-AML2 and OCI-AML3 cells at baseline (NT), or treated with high (12.5  $\mu$ M) or low (6.25  $\mu$ M) doses of ATN-224 for 16 hr. **(B)** Left: Representative flow cytometry plots of wild-type (WT) and *PPM1D*-mutant cells treated with ATN-224 (25  $\mu$ M for 24 hr) and stained for Annexin V-APC and PI for apoptosis; multiple unpaired t-tests, ns = non-significant, \* $p < 0.05$ , \*\* $p < 0.01$ , \*\*\* $p < 0.001$ , \*\*\*\* $p < 0.0001$ . **(C)** Endogenous mitochondrial superoxide levels of WT and *PPM1D*-mutant leukemia cell lines were measured using MitoSOX Green staining (1  $\mu$ M). The mean fluorescence intensity (MFI) of MitoSOX Green was measured by flow cytometry. Mean  $\pm$  SD ( $n = 3$ ) is shown.

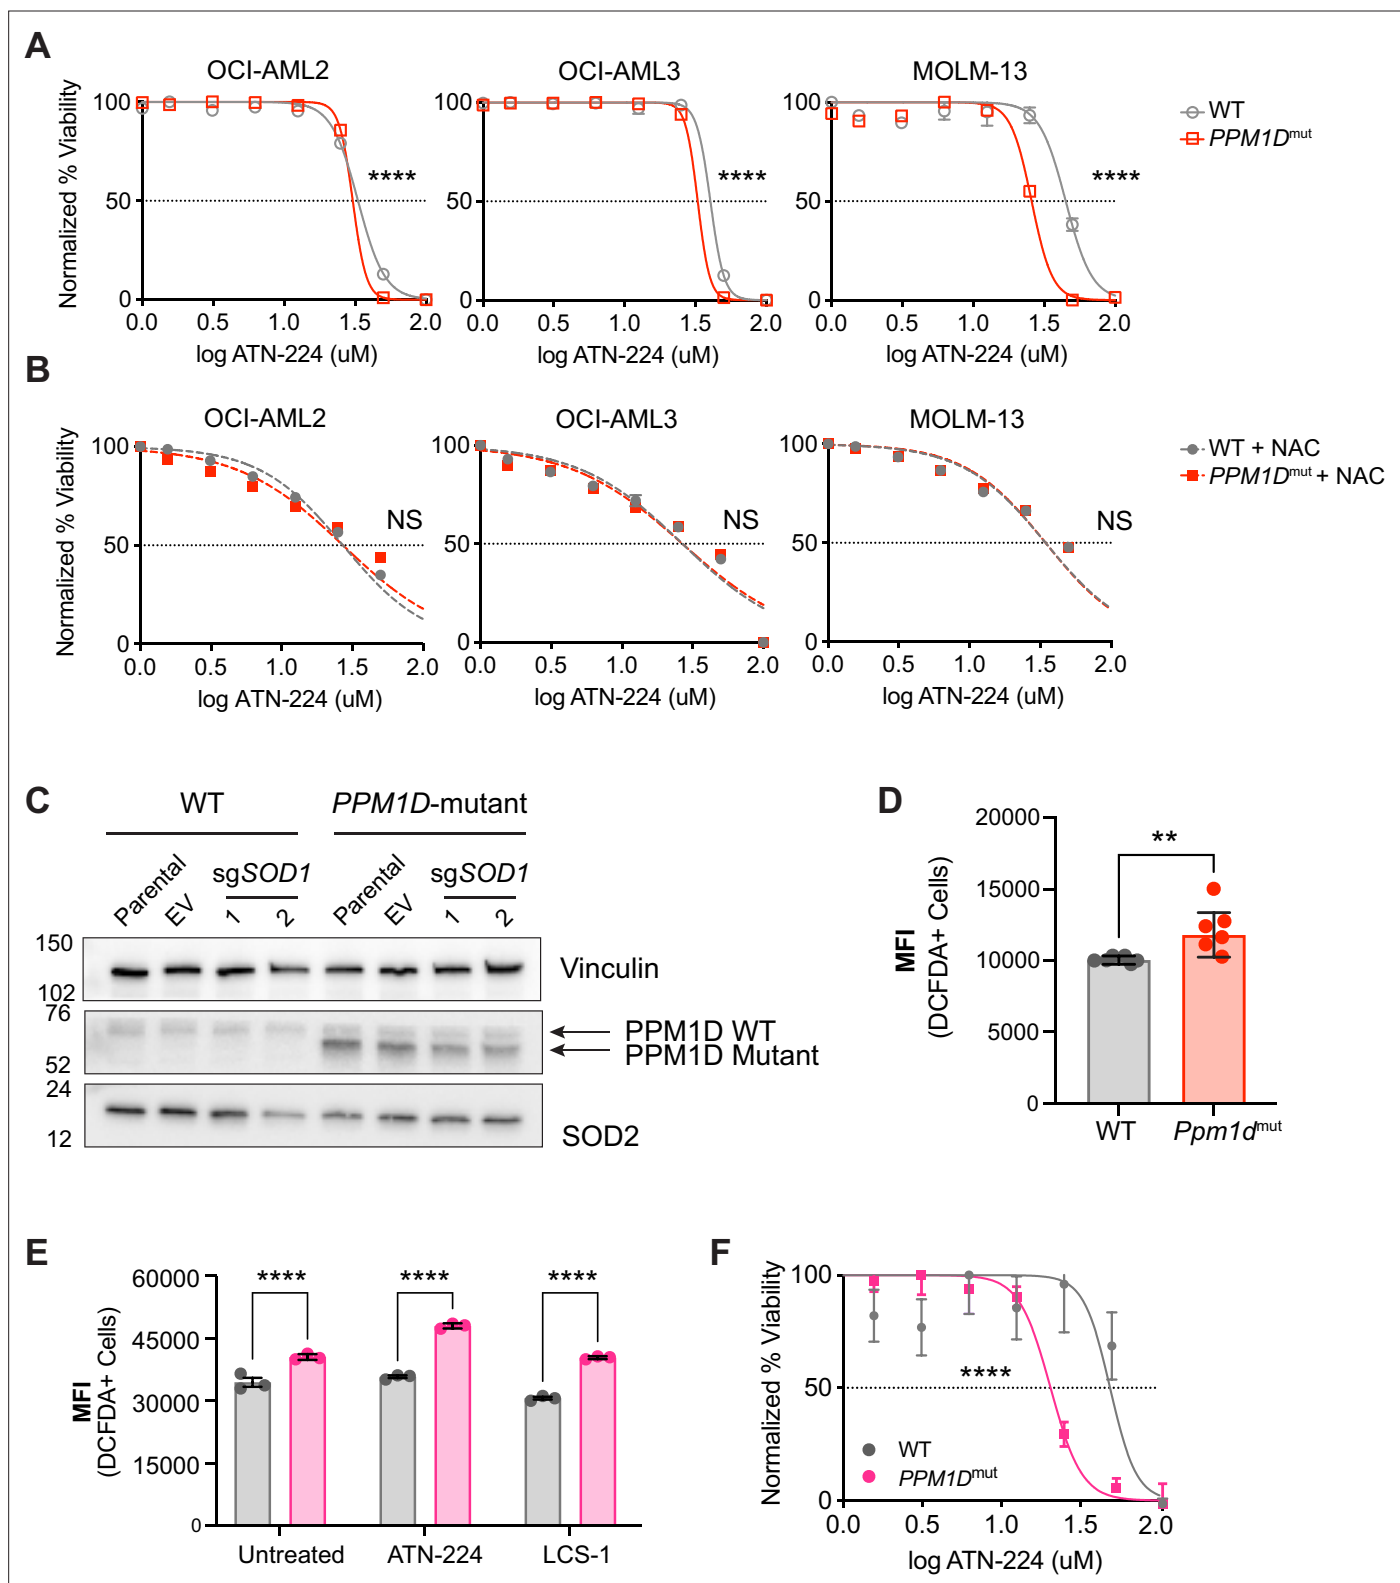

**Figure 2—figure supplement 2.** *PPM1D*-mutant cells have increased oxidative stress. (A,B) Dose-response curves for cell viability with SOD1 inhibitor (ATN-224) (A) or ATN-224 in combination with 0.25μM N-acetylcysteine (NAC) (B) in wild-type (WT) and *PPM1D*-mutant leukemia cell lines after 24hr. Mean ± SD (n=3) is shown along with a non-linear regression curve. All values are normalized to the baseline cell viability with vehicle, as measured by MTT assay. (C) Immunoblot of SOD2 expression in WT and *PPM1D*-mutant cells at baseline and after SOD1 deletion. WT and *PPM1D*-mutant Cas9-OCI-AML2 cells were transduced with control (empty vector [EV]) or sgSOD1 lentiviruses. Two sgRNAs targeting SOD1 were tested. Three days

Figure 2—figure supplement 2 continued on next page

*Figure 2—figure supplement 2 continued*

post-transduction, the cells underwent puromycin selection (3  $\mu\text{g}/\text{mL}$ ) for days after which they were harvested for western blot. Blots were probed with anti-PPM1D (1:1000), anti-SOD2 (1:1000), and anti-vinculin (1:2500). **(D)** Total reactive oxygen species (ROS) of WT and Ppm1d-mutant mouse embryonic fibroblasts (MEFs) measured by 2',7'-dichlorofluorescein diacetate (DCFDA) (10  $\mu\text{M}$ ) staining. Mean fluorescence intensity (MFI) was determined by flow cytometry.  $n=6$  biological replicates were used for each genotype. Data shown are the mean of each biological replicate; unpaired t-test. **(E)** Total ROS of WT GM12878 (gray) and PPM1D-mutant (pink) patient lymphoblastoid cell lines (LCLs) at baseline and after 24 hr of SOD1 inhibition measured by DCFDA (10  $\mu\text{M}$ ) staining. MFI was determined by flow cytometry; multiple unpaired t-tests. **(F)** Dose-response curve of WT and PPM1D-mutant LCLs after ATN-224 treatment. IC50s of WT and PPM1D-mutant LCLs were 48.8  $\mu\text{M}$  and 20.51  $\mu\text{M}$ , respectively, as measured by MTT assay; non-linear regression analysis, ns = non-significant ( $p>0.05$ ), \*\* $p<0.01$ , \*\*\* $p<0.001$ , \*\*\*\* $p<0.0001$ .



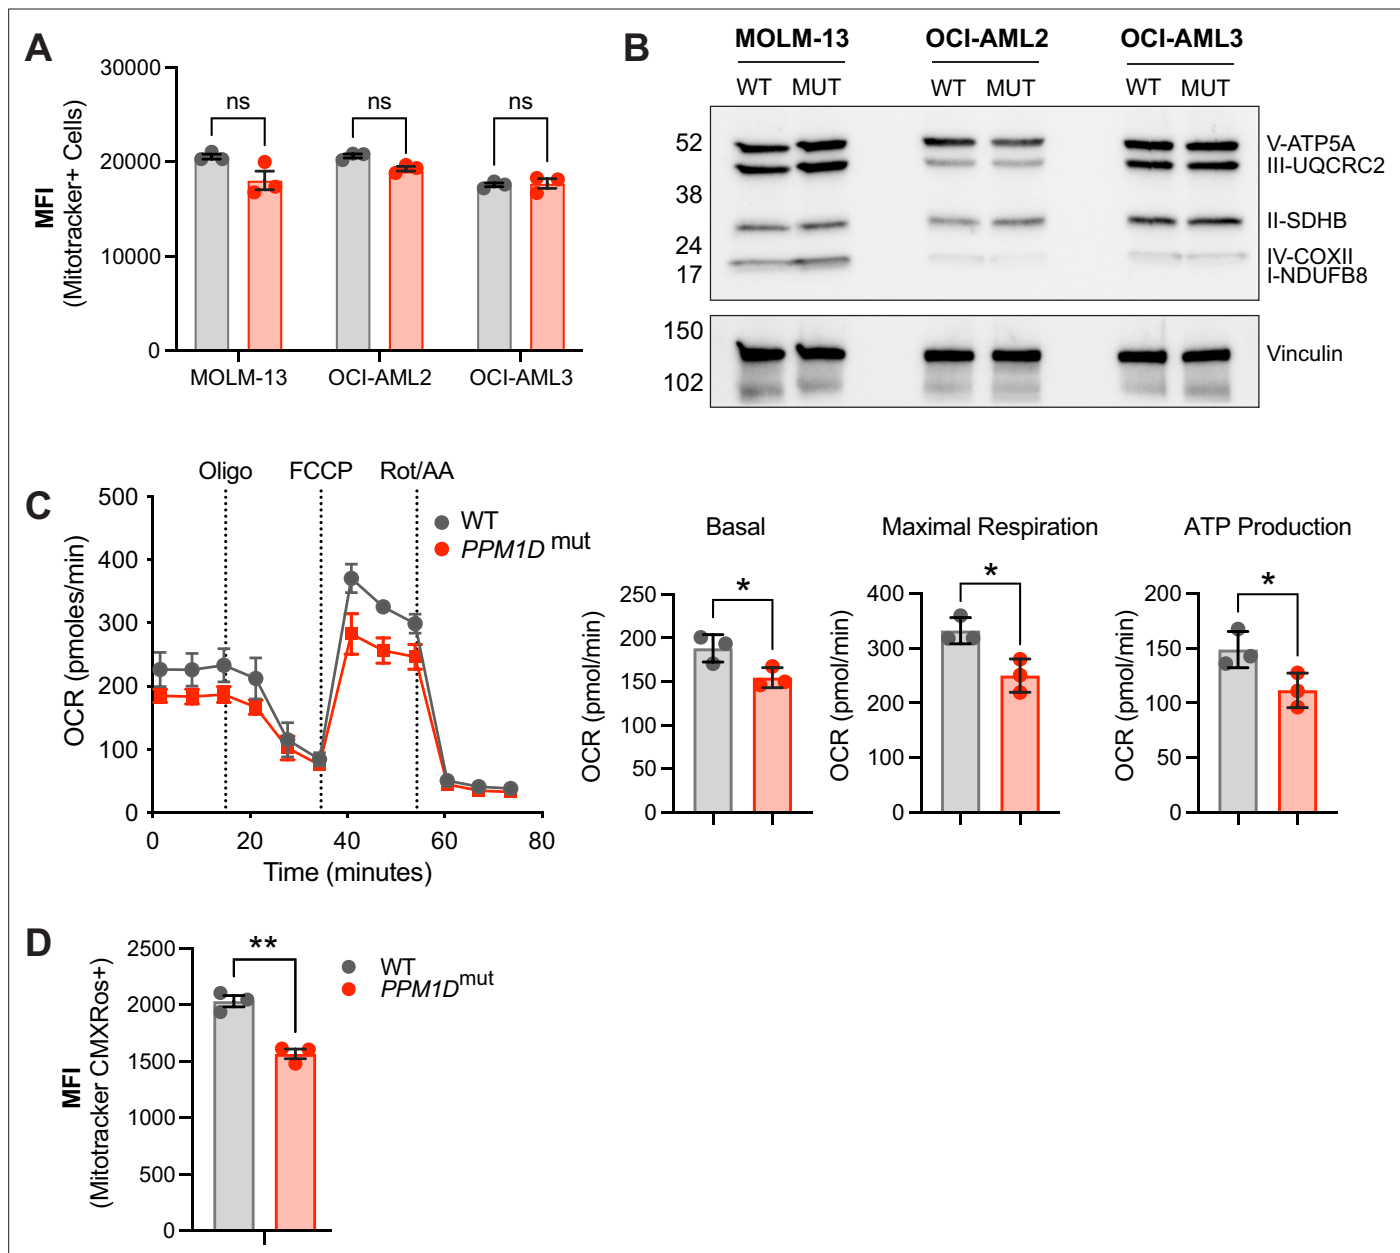

**Figure 3.** *PPM1D*-mutant cells have altered mitochondrial function. **(A)** Mitochondrial mass of wild-type (WT) and *PPM1D*-mutant leukemia cells was determined using MitoTracker Green (100 nM) and the mean fluorescence intensity was analyzed by flow cytometry. Data represents mean  $\pm$  SD of triplicates. At least three independent experiments were conducted with similar findings; unpaired t-tests. **(B)** Immunoblot of WT and *PPM1D*-mutant cell lysates probed with the human OXPHOS antibody cocktail (1:1000) and vinculin (1:2000). **(C)** Measurement of mitochondrial oxygen consumption rate (OCR) by seahorse assay in WT and *PPM1D*-mutant OCI-AML2 cells after treatment with oligomycin (1.5  $\mu$ M), FCCP (0.5  $\mu$ M), and rot/AA (0.5  $\mu$ M). Quantification of basal, maximal, and ATP-linked respiration are shown. Data shown are the mean  $\pm$  SD of technical triplicates. **(D)** Mitochondrial membrane potential of WT and *PPM1D*-mutant OCI-AML2 cells was measured using MitoTracker CMXRos (400 nM). The mean fluorescence intensity (MFI) was measured and analyzed by flow cytometry. Data represents mean  $\pm$  SD of triplicates, unpaired t-test, ns = non-significant ( $p > 0.05$ ), \* $p < 0.05$ , \*\* $p < 0.01$ .

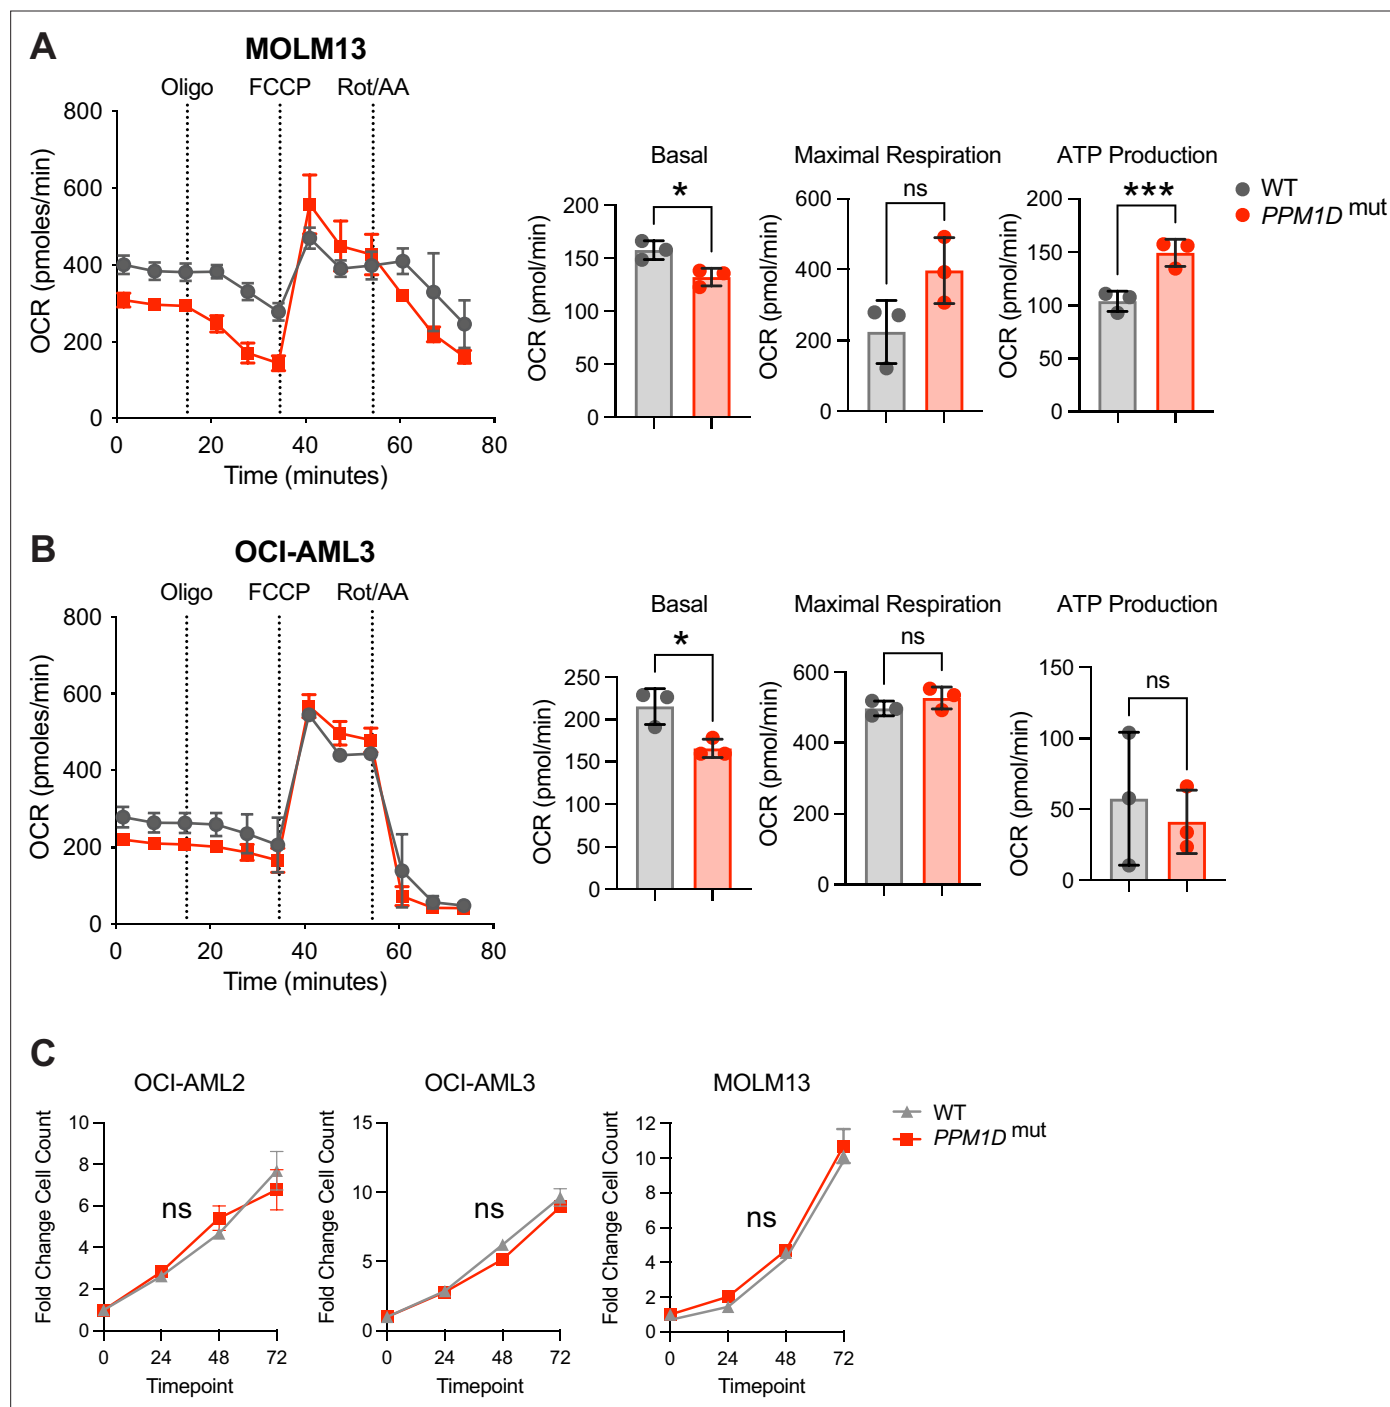

**Figure 3—figure supplement 1.** *PPM1D*-mutant cells have altered mitochondrial function. (A,B) Measurement of mitochondrial oxygen consumption rate (OCR) by seahorse assay in wild-type (WT) vs. *PPM1D*-mutant MOLM-13 (A) and OCI-AML3 (B) cells after treatment with oligomycin (1.5  $\mu$ M), FCCP (0.5  $\mu$ M), and rot/AA (0.5  $\mu$ M). Quantification of basal, maximal, and ATP-linked respiration shown. Each cell line was performed in technical triplicates, Student's t-test. (C) Growth curves of WT and *PPM1D*-mutant leukemia cell lines at 24, 48, and 72 hr. Cell counts were normalized to day 0. ns = non-significant ( $p > 0.05$ ), \* $p < 0.05$ , \*\*\* $p < 0.001$ .

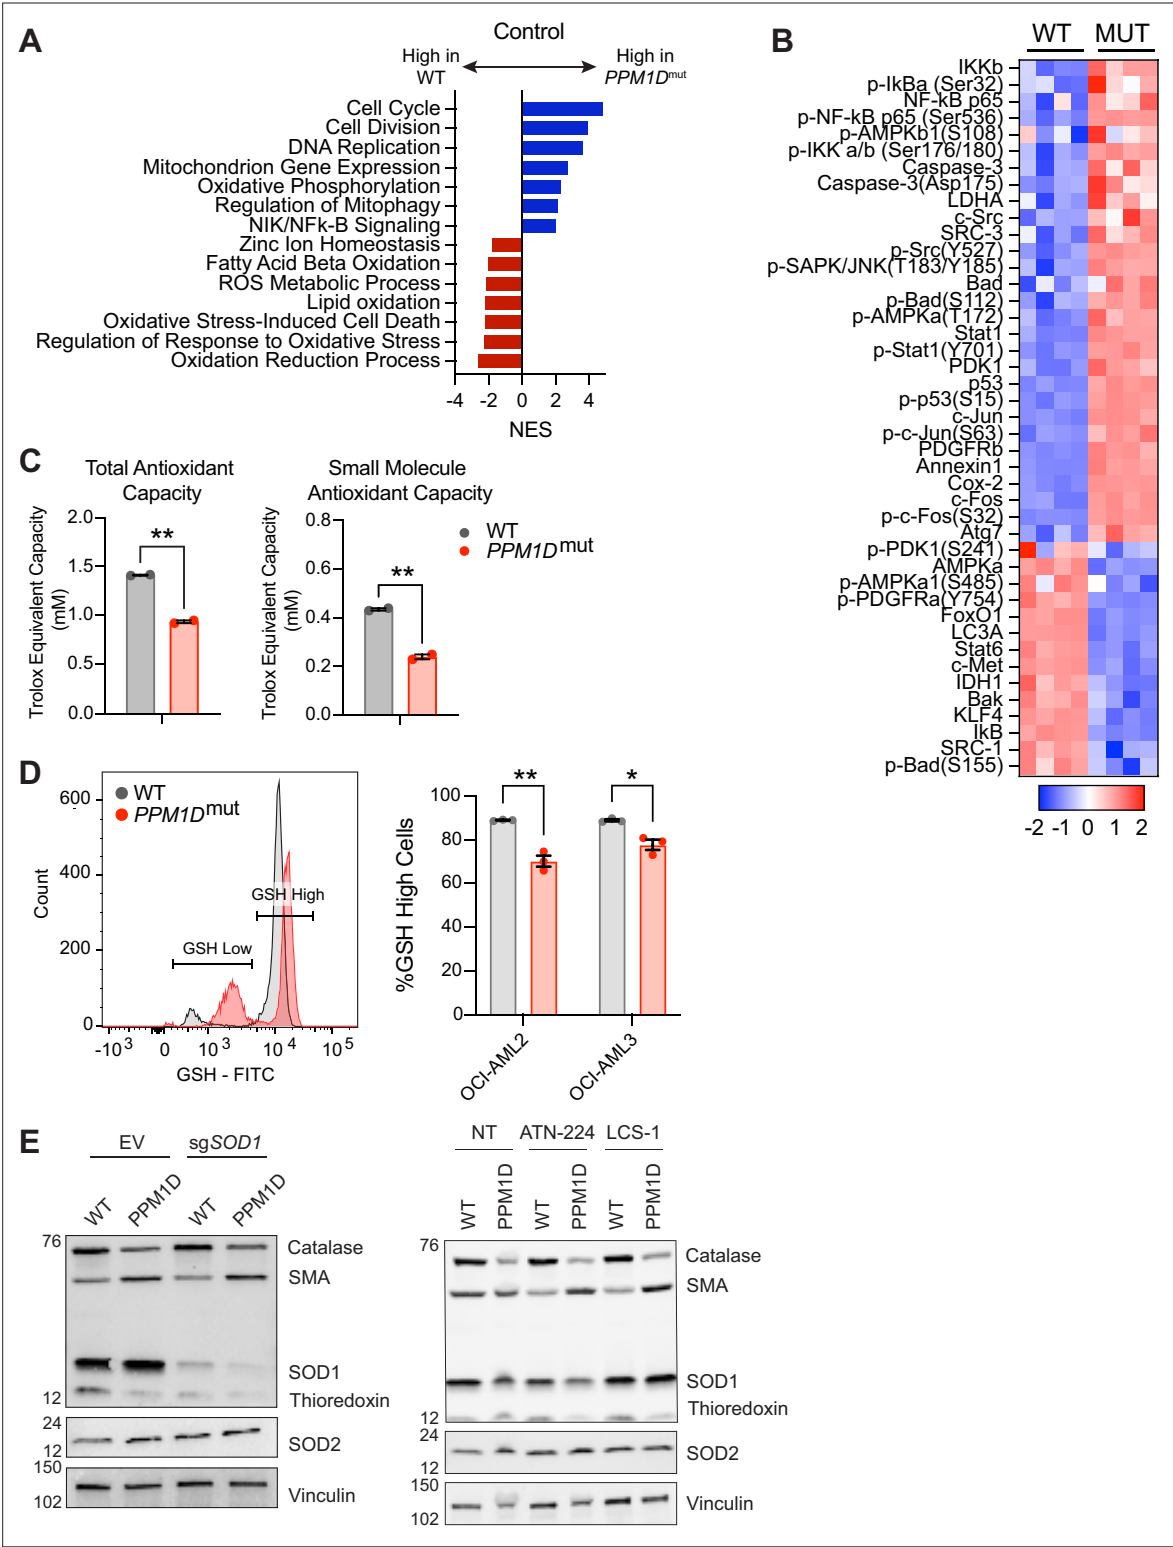

**Figure 4.** *PPM1D*-mutant cells have a reduced oxidative stress response. **(A)** RNA-sequencing (RNA-seq) gene set enrichment analysis (GSEA) of *PPM1D*-mutant cells compared to wild-type (WT) Cas9-OCI-AML2 cells. Significantly up- and downregulated pathways are indicated by the blue and red bars, respectively. Normalized enrichment scores (NES) are shown with false discovery rate (FDR) < 0.25. **(B)** Reverse-phase protein array (RPPA) profiling of WT and *PPM1D*-mutant OCI-AML2 cells. Proteins from the ‘Response to Oxidative Stress’ pathway have been selected for the heatmap. Each column represents a technical replicate. See **Figure 4—source data 2** for the raw data. **(C)** Total- and small-molecule antioxidant capacity of WT and *PPM1D*-mutant cells performed in technical duplicates. **(D)** Intracellular glutathione (GSH) levels measured by flow cytometry using the Intracellular

Figure 4 continued on next page

## Figure 4 continued

GSH Detection Assay Kit (Abcam). Left: Representative flow cytometry plot demonstrating the gating for GSH-high and GSH-low populations. Right: Quantification of the percentage of GSH-high cells for each cell line. Mean  $\pm$  SEM (n=3) are shown. **(E)** Immunoblot of WT and *PPM1D*-mutant OCI-AML2 after transduction with the empty vector (EV) control and after *SOD1* deletion (left) or after treatment with SOD1 inhibitors for 16 hr (right, ATN-224 12.5  $\mu$ M, lung cancer screen-1 [LCS-1] 1.25  $\mu$ M). Lysates were probed with an anti-oxidative stress defense cocktail (1:250), SOD2 (1:1000), and vinculin (1:2000). SMA = smooth muscle actin. Student's t-tests were used for statistical analysis; \*\*p<0.01, \*p<0.05.

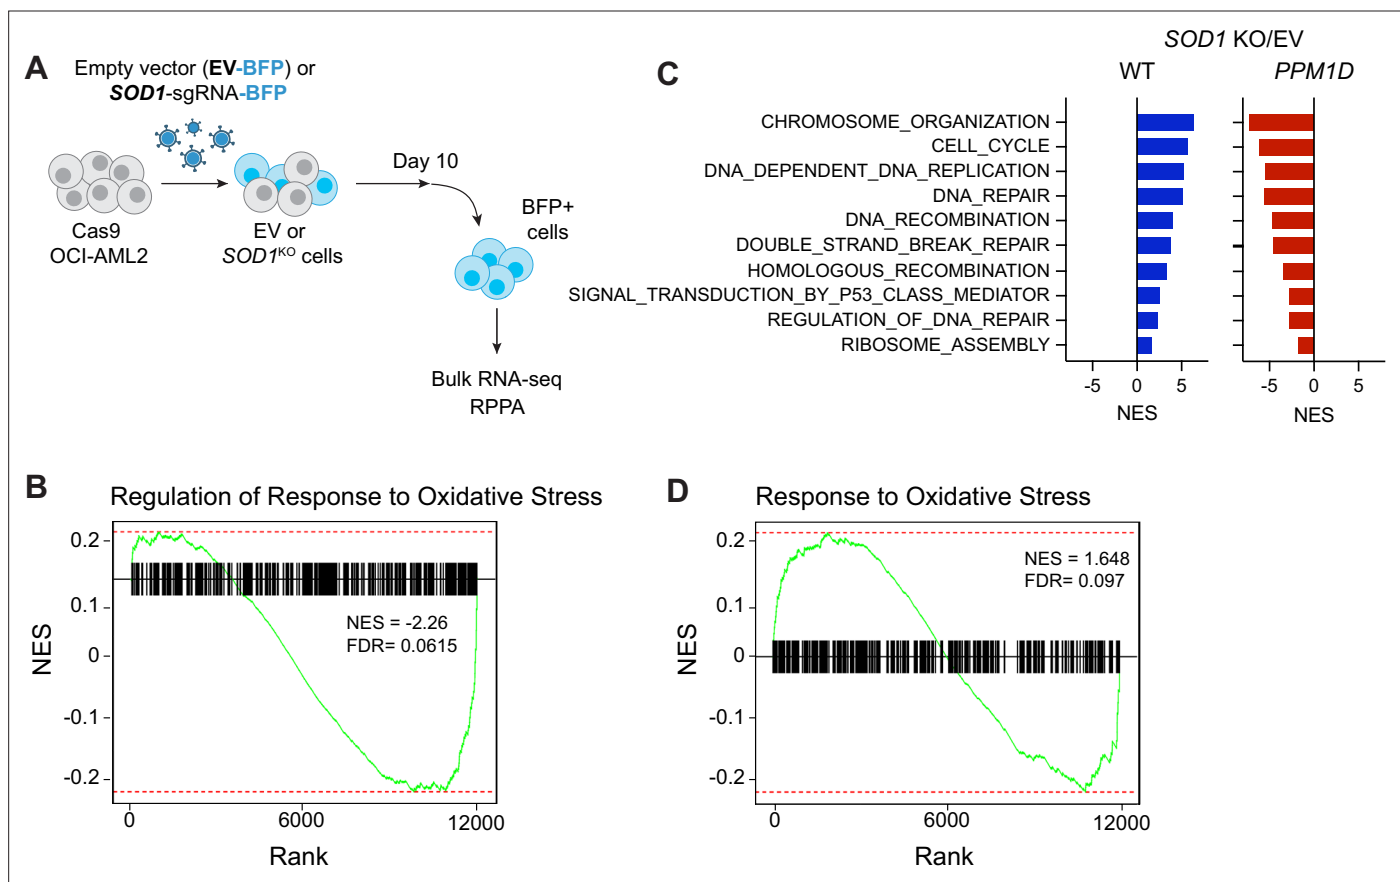

**Figure 4—figure supplement 1.** *PPM1D*-mutant cells have reduced oxidative stress response. **(A)** Schematic of the experimental setup for the bulk RNA-sequencing and reverse-phase protein array. Wild-type (WT) and *PPM1D*-mutant Cas9 OCI-AML2 cells were transduced with either empty vector (EV)-blue fluorescent protein (BFP) or *SOD1*-sgRNA-BFP. Cells were passaged for 10 days and then sorted for BFP expression for downstream analysis. **(B, D)** Gene set enrichment analysis (GSEA) enrichment plots for *PPM1D*-mutant cells compared to WT after transduction with EV **(B)** or after *SOD1*-knockout **(D)** for the 'Regulation of Response to Oxidative Stress' (GO:1902882) and 'Response to Oxidative Stress' (GO:0006979). Normalized enrichment scores (NES) are shown with false discovery rate (FDR) < 0.25. **(C)** GSEA of RNA-sequencing of *SOD1*-deleted cells compared to EV control in WT and *PPM1D*-mutant cells. Blue and red bars indicate significantly up- and downregulated pathways, respectively. NES are indicated. All pathways filtered for FDR < 0.25. See **Figure 4—source data 1** for raw data.

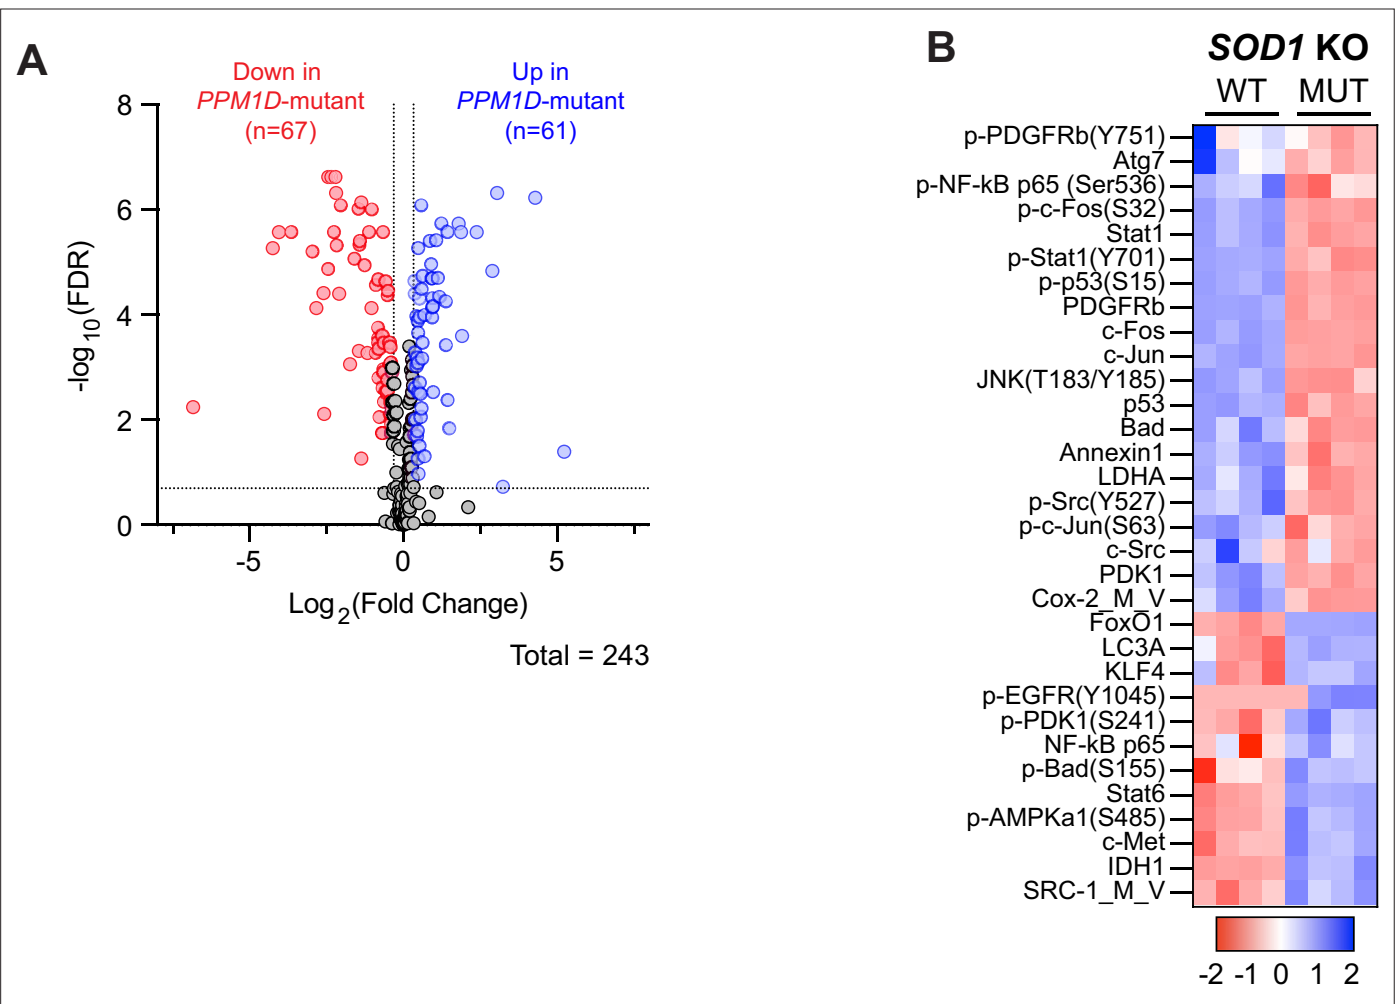

**Figure 4—figure supplement 2.** *PPM1D*-mutant cells have reduced oxidative stress response. **(A)** Volcano plot of the differentially expressed proteins from the reverse-phase protein array (RPPA) in *PPM1D*-mutant OCI-AML2 cells compared to wild-type (WT). Red and blue dots indicate significantly up- and downregulated proteins, respectively, with a cutoff false discovery rate (FDR) < 0.2 and linear fold change > |1.2|. **(B)** RPPA profiling of WT and *PPM1D*-mutant cells after *SOD1* deletion. Proteins from the ‘Response to Oxidative Stress’ pathway have been selected for the heatmap. Each column represents a technical replicate. See **Figure 4—source data 2** for the raw data.

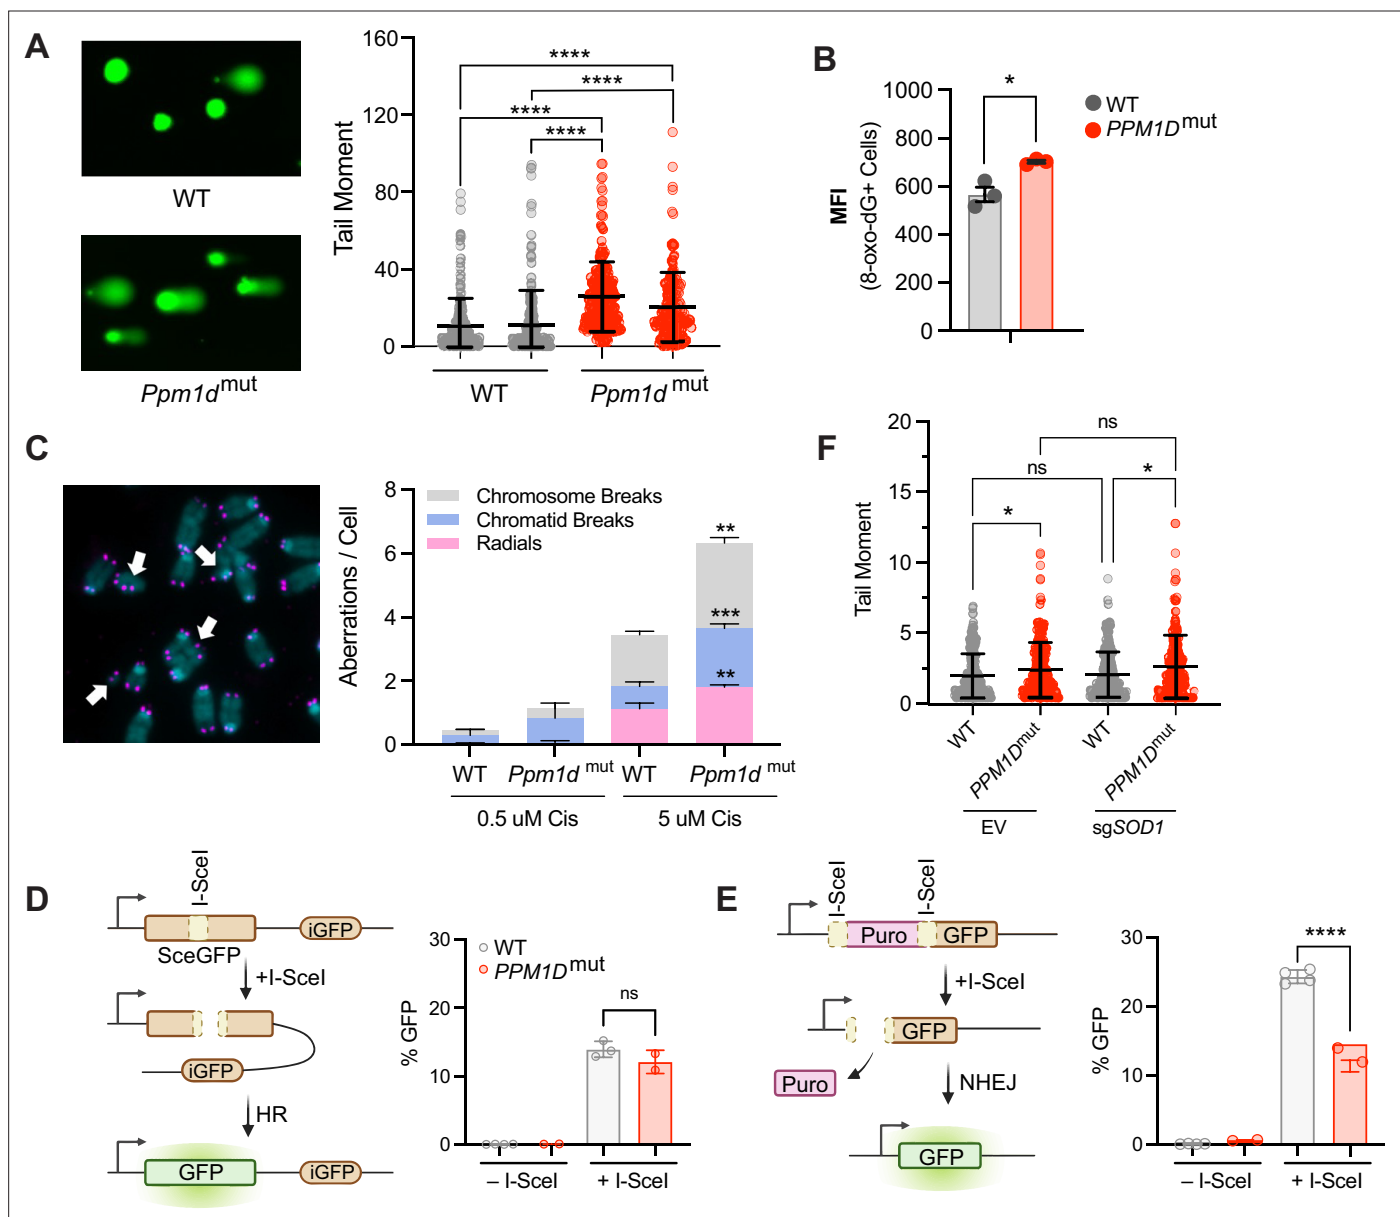

**Figure 5.** *PPM1D* mutations increase genomic instability and impair non-homologous end-joining. (A) Left: Representative images of comet assays of mouse embryonic fibroblasts (MEFs). Two biological replicates were assessed for each genotype. Right: Quantification of  $n \geq 150$  comets per experimental group with the Comet IV software; two-way ANOVA. (B) Mean fluorescent intensity (MFI) of 8-oxo-2'-deoxyguanosine (8-oxo-dG) lesions within wild-type (WT) and *PPM1D*-mutant OCI-AML2 cells as measured by flow cytometry; Student's t-test. (C) Left: Representative images of metaphase spreads of WT and *Ppm1d*-mutant mouse primary B-cells treated with low (0.5  $\mu\text{M}$ ) or high (5  $\mu\text{M}$ ) doses of cisplatin. Right:  $n \geq 50$  metaphase cells were quantified in each experimental condition for chromosomal aberrations (white arrows).  $n = 2$  biological replicates used for each genotype. Student's t-test was used for statistical analysis. (D–E) Left: Schematic of the homologous recombination (D) or non-homologous end-joining (E) U2OS DNA damage repair cassettes. Right: Quantification of GFP% analyzed by flow cytometry 48 hr after induction of DNA damage by I-SceI transduction; Student's t-test. (F) Comet assay quantification of WT and *PPM1D*-mutant Cas9-OCI-AML2 cells 6 days after lentiviral transduction with the empty vector (EV) control, or *sgSOD1* to induce *SOD1* deletion. Quantification and analyses of tail moments were performed using the Comet IV software.  $n \geq 150$  comets were scored per experimental group; two-way ANOVA. Data are mean  $\pm$  SD ( $n = 3$ ), ns = non-significant ( $p > 0.05$ ), \* $p < 0.05$ , \*\* $p < 0.01$ , \*\*\* $p < 0.001$ , \*\*\*\* $p < 0.0001$ .

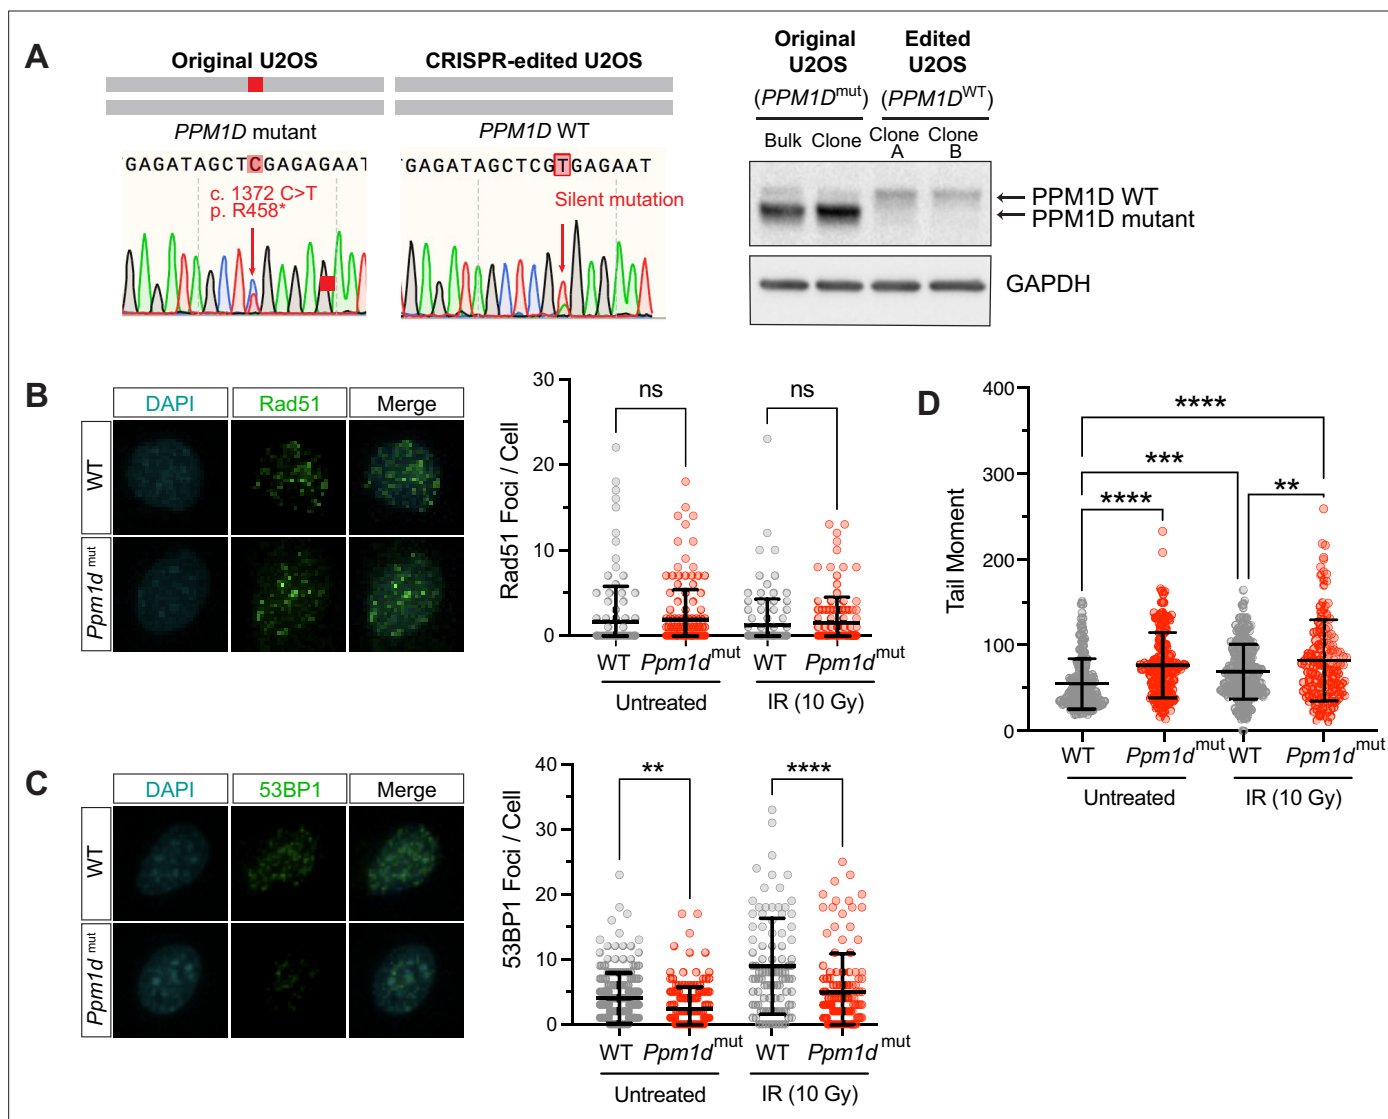

**Figure 5—figure supplement 1.** *PPM1D*-mutations increase genomic instability and impairs non-homologous end-joining repair. **(A)** Left: Sanger sequencing traces of the parental U2OS cell line harboring a c.1372 C>T mutation in *PPM1D* and the CRISPR-edited U2OS cell line with mutation corrected to wild-type (WT) *PPM1D*. Right: Immunoblot validation of these clones are shown. Lysates were probed with anti-*PPM1D* (1:1000) and anti-GAPDH (1:1000). **(B,C)** Left: Representative images of Rad51 and 53BP1 immunofluorescence microscopy. Mouse embryonic fibroblasts were treated with 10 Gy irradiation, harvested 1 hr post-irradiation and stained for the indicated markers. Right: Quantification of the number of foci per cell is shown. Analysis was performed using CellProfiler.  $n > 100$  cells for each condition; Student's t-test. **(D)** Comet assay quantification of mouse embryonic fibroblasts at baseline and after 1 hr post-irradiation (10 Gy). Quantification and analyses of tail moments were performed using the Comet IV software.  $n \geq 150$  comets were scored per experimental group; two-way ANOVA, ns = non-significant ( $p > 0.05$ ), \* $p < 0.05$ , \*\* $p < 0.01$ , \*\*\* $p < 0.001$ , \*\*\*\* $p < 0.0001$ .
